# Supplementary material for: Identification of mental health and quality of life outcomes in primary care databases in the UK: a systematic review
Source: PubMed Central journal article supplement (PMC6609128; doi:10.1136/bmjopen-2019-029227), 2019-07-02
Supplement: bmjopen-2019-029227.draft_revisions.pdf [file bmjopen-2019-029227.draft_revisions.pdf]

# BMJ Open

BMJ Open is committed to open peer review. As part of this commitment we make the peer review history of every article we publish publicly available.

When an article is published we post the peer reviewers' comments and the authors' responses online. We also post the versions of the paper that were used during peer review. These are the versions that the peer review comments apply to.

The versions of the paper that follow are the versions that were submitted during the peer review process. They are not the versions of record or the final published versions. They should not be cited or distributed as the published version of this manuscript.

BMJ Open is an open access journal and the full, final, typeset and author-corrected version of record of the manuscript is available on our site with no access controls, subscription charges or pay-per-view fees (<http://bmjopen.bmj.com>).

If you have any questions on BMJ Open's open peer review process please email [info.bmjopen@bmj.com](mailto:info.bmjopen@bmj.com)

# BMJ Open

## Identification of mental health and quality of life outcomes in primary care databases in the United Kingdom: a systematic review

|                               |                                                                                                                                                                                                                                                                                                                                                                                             |
|-------------------------------|---------------------------------------------------------------------------------------------------------------------------------------------------------------------------------------------------------------------------------------------------------------------------------------------------------------------------------------------------------------------------------------------|
| Journal:                      | <i>BMJ Open</i>                                                                                                                                                                                                                                                                                                                                                                             |
| Manuscript ID                 | bmjopen-2019-029227                                                                                                                                                                                                                                                                                                                                                                         |
| Article Type:                 | Research                                                                                                                                                                                                                                                                                                                                                                                    |
| Date Submitted by the Author: | 17-Jan-2019                                                                                                                                                                                                                                                                                                                                                                                 |
| Complete List of Authors:     | Carreira, Helena; London School of Hygiene and Tropical Medicine Faculty of Epidemiology and Population Health, Department of Non-communicable Disease Epidemiology<br>Williams, Rachael; Clinical Practice Research Datalink,<br>Strongman, Helen; London School of Hygiene and Tropical Medicine, Department of Non-communicable Disease Epidemiology<br>Bhaskaran, Krishnan; LSHTM, NCDE |
| Keywords:                     | PRIMARY CARE, MENTAL HEALTH, Electronic health records databases                                                                                                                                                                                                                                                                                                                            |
|                               |                                                                                                                                                                                                                                                                                                                                                                                             |

SCHOLARONE™  
Manuscripts

1  
2  
3 **Identification of mental health and quality of life outcomes in primary care databases**  
4 **in the United Kingdom: a systematic review**  
5  
6  
7

8 Helena Carreira<sup>1</sup>, Rachael Williams<sup>2</sup>, Helen Strongman<sup>1</sup>, Krishnan Bhaskaran<sup>1</sup>  
9

10  
11  
12 <sup>1</sup> Department of Non-Communicable Disease Epidemiology, Faculty of Epidemiology and  
13 Population Health, London School of Hygiene & Tropical Medicine, Keppel street, London  
14 WC1E 7HT, United Kingdom.  
15  
16

17  
18 <sup>2</sup> Clinical Practice Research Datalink (CPRD), Medicines and Healthcare products Regulatory  
19 Agency, 10th Floor, 10 South Colonnade, Canary Wharf, London E14 4PU, United Kingdom.  
20  
21

22  
23  
24  
25 **Correspondence to:**

26 Helena Carreira

27  
28 Department of Non-communicable Disease Epidemiology

29 Faculty of Epidemiology and Population Health

30 London School of Hygiene & Tropical Medicine

31 Keppel Street, London WC1E 7HT, United Kingdom.  
32  
33

34 [helena.carreira@lshtm.ac.uk](mailto:helena.carreira@lshtm.ac.uk)  
35  
36  
37  
38  
39  
40  
41  
42  
43  
44  
45  
46  
47  
48  
49  
50  
51  
52  
53  
54  
55  
56  
57  
58  
59  
60

## Abstract

*Objectives:* To summarise the methods used to identify outcomes of anxiety, depression, fatigue, dementia/mild cognitive dysfunction, sexual dysfunction, pain, sleep disorders, and fatal and non-fatal self-harm in studies using electronic health records from primary care databases in the United Kingdom (UK).

*Design:* Systematic review of the literature. Medline and Embase were searched up to June 2018 to identify eligible studies. Two researchers appraised the studies applying pre-defined criteria. When necessary, authors were contacted to request the list of Read codes used in the original studies.

*Results:* 120 studies were eligible. Codelists were available for 17/42 studies of depression; 21/41 studies of fatal and non-fatal self-harm; 17/27 studies of dementia/cognitive dysfunction; 5/12 studies of anxiety; 4/8 studies of pain; 3/6 studies of fatigue and sexual dysfunction; 1/2 studies of sleep disorders. Depression was most often defined using codes for diagnoses (37/42 studies) and/or antidepressants prescriptions (21/42 studies); 6 studies reported including symptoms in their definition. Anxiety was defined with codes for diagnoses (12/12 studies); 4 studies also reported including symptoms. Fatal/non-fatal self-harm was ascertained in primary care data linked to the Office for National Statistics mortality database in 9 studies. Most studies of dementia included Alzheimer's disease, and vascular and frontotemporal dementias; 3 studies evaluated domains of cognitive function. Fatigue definitions varied little, including chronic fatigue syndrome, neurasthenia, and post viral fatigue syndrome. All studies of sexual dysfunction focused on male conditions, principally erectile dysfunction. Sleep disorders included insomnia and hypersomnia. There was substantial variability in the codes used to identify outcomes; validation of codelists was carried out for 21/120 studies.

*Conclusions:* Detailed information about codes used to identify mental health and quality of life outcomes in UK primary care databases was unavailable for around half of studies of these outcomes; where available, definitions and codelists were heterogeneous and rarely validated.

### Strengths and limitations of this study

- Comprehensive systematic review of the literature aiming at describing the methods used to identify outcomes of mental health and quality of life in electronic health records databases in the UK;
- Potential for error in the selection of the eligible studies minimised by duplication of the screening;
- The authors of the original studies were contacted to obtain the list of Read codes used when these were not publicly available;
- We only considered definitions of study outcomes, and did not consider studies where mental health or quality of life variables were covariates or exposure variables, limiting the generalisability of our results to these other contexts.

### Funding

This work was supported by the Medical Research Council (MRC) and the Clinical Practice Research Datalink (CPRD) at the Medicines and Healthcare products Regulatory Agency (MHRA) (grant number MR/M016234/1 to H.C.); and the Wellcome Trust and the Royal Society (grant number 107731/Z/15/Z to K.B.).

### Acknowledgements

We would like to thank the authors of the original studies who kindly provided the list of codes used in their studies. We would also like to thank Daniel Dedman (CPRD/LSHTM) for helpful comments on the search expressions.

The copyright of the morbidity definitions/categorisations lists (©2014) obtained from the authors for the studies by Roddy et al, 2013, Abdul Sultan et al, 2017, and Mansfield et al, 2018, are owned by Keele University, the development of which was supported by the Primary Care Research Consortium. The authors would like to acknowledge Keele University's Prognosis and Consultation Epidemiology Research Group who have given us permission to utilise the morbidity definitions/categorisations lists (©2014); for access/details relating to the morbidity definitions/categorisation lists (©2014) please go to [www.keele.ac.uk/mrr](http://www.keele.ac.uk/mrr).

### Conflict of interest

Dr Bhaskaran reports grants from Wellcome Trust, the Royal Society, Medical Research Council, and British Heart Foundation, outside the submitted work. Dr Williams reports that

1  
2  
3 CPRD has financial relationships with its clients, including the London School of Hygiene and  
4 Tropical Medicine, in relation to providing access to research data and services outside the  
5 submitted work. The other authors in this report have no conflict of interest to disclose.  
6  
7  
8  
9  
10  
11  
12  
13  
14  
15  
16  
17  
18  
19  
20  
21  
22  
23  
24  
25  
26  
27  
28  
29  
30  
31  
32  
33  
34  
35  
36  
37  
38  
39  
40  
41  
42  
43  
44  
45  
46  
47  
48  
49  
50  
51  
52  
53  
54  
55  
56  
57  
58  
59  
60

For peer review only

## Introduction

Primary care databases of electronic health records (EHR) in the United Kingdom (UK) such as The Clinical Practice Research Datalink (CPRD), QResearch or The Health Improvement Network (THIN) have been widely used to study mental health outcomes such as depression [1, 2], and other key aspects of quality of life, such as fatigue and pain [3, 4], even though the identification of patients with these conditions is not straightforward.

Strategies to identify patients with a given condition in the EHRs typically include generating lists of relevant codes, then searching the patients' record for these codes to identify symptoms, diagnoses, referrals, appointments for disease management and monitoring, and/or prescriptions of interest [5]. The process of developing a list of codes of interest, and deciding how to apply them, may be subjective. For example, a study on the selection of codes for stroke, a relatively well-defined clinical outcome, showed that researchers with clinical and epidemiological experience may have differing interpretations of the relevance of each code [6]. A systematic review on the identification of patients with cancer in UK primary care databases described several combinations of Read codes used across studies [7]. Estimates of validity of diagnoses in these databases have been generally high across disease types [8, 9], but the heterogeneity in the codelists raises issues of misclassification, and hampers the comparability of studies using the same data to assess the same outcome [10]. The pattern of use of the codes by the general practitioners (GPs) also needs consideration. For example, in recording depression, it has been shown that GPs have switched from diagnostic to symptom codes in recent years [11]; this may have a large impact on outcome definitions based around diagnostic codes. In addition, outcome definitions using prescription data may lead to misclassification where drugs have multiple indications: for example, sertraline, paroxetine, or escitalopram, amongst the most commonly used antidepressants, are also first-line treatments for generalised anxiety disorder [12]; and amitriptyline, a tricyclic antidepressant, is also a first-line treatment for neuropathic pain [13].

Given the broad interest in mental health and quality of life outcomes, and the strong potential for primary care data to contribute to studying these outcomes, our aim was to systematically review and summarise the strategies used to define such outcomes in previous studies, and the extent to which case definitions have been validated.

## Methods

### Outcomes of interest

The outcomes of interest for this review were: anxiety, depression, fatigue, dementia and mild cognitive impairment, pain, sexual dysfunction, sleep disorder and fatal and non-fatal self-harm. We considered that a study provided data for mild cognitive impairment when domains of cognitive function were studied (i.e. attention, executive function, memory, language, motor, and social). Composite outcomes of two or more of these outcomes (e.g. psychological impairment defined by anxiety or depression) were also eligible.

### Information sources and search strategy

We searched MEDLINE and Embase via Ovid®, from inception up to 28 June 2018, to identify studies that involved EHRs from primary care databases and studied one of the outcomes of interest (see above). The search expressions are provided in appendix 1, and combined terms to identify primary care databases, terms to identify mental health and quality of life outcomes, and terms indicating UK-based research. The CPRD, THIN and QResearch list of publications, available in their websites, were manually revised to identify additional studies. The lists of bibliographic references of the studies considered eligible for the review were also screened by hand to identify additional studies.

### Studies eligibility

We considered eligible the studies that used data from a primary care database that routinely gathers EHR data from primary care practices in the UK, and in which the outcome of interest was one of those of interest for this study (see list above). This included purely descriptive studies on the incidence/prevalence of the outcome and analytical studies where the condition of interest was one of the main outcomes of the study. Studies of primary care data linked to other sources of data, such as the Hospital Episode Statistics (HES) or the Office for National Statistics (ONS) mortality data, were also considered eligible.

Abstracts from conferences were excluded, as it was unlikely that the methods section would provide sufficiently detailed information on the definition of the outcomes. Studies of pain caused by infectious agents (e.g. herpes zoster) were excluded; similarly, studies of sleep apnoea and narcolepsy were excluded due to their unlikely psychological origin [14, 15]. Studies reporting only on patterns of treatment of the conditions of interest were excluded, unless pharmacological treatment was clearly used as a proxy for the definition of the



1  
2  
3 condition. Studies where the outcome of interest was comorbidity were also excluded. Where  
4 there were multiple studies from the same group of authors, we considered these separately,  
5 since the definition of the same outcomes could have been updated over time.  
6  
7

8 The eligibility of the studies was determined by two authors (HC and HS) reviewing all  
9 records retrieved from the publications databases. First, the title of each study was read to  
10 determine the eligibility for the review; when the information provided in the title was  
11 insufficient for a clear exclusion of the study, the study was considered for further  
12 assessment. Secondly, the full text of each study not previously excluded was read, in order  
13 to determine the eligibility. Disagreements over study eligibility between the two reviewers  
14 were resolved by discussion, including with a third researcher (KB or RW) where needed.  
15  
16  
17  
18  
19  
20

### 21 Data acquisition and extraction

22  
23 We abstracted data on study characteristics (title, study design), the primary care database  
24 used, any database(s) linked to the primary care data, outcome(s) reported, definition of the  
25 outcome(s) (i.e. Read codes, drug prescriptions, International Classification of Diseases  
26 (ICD) codes, etc.) and any codelist available. When there were two or more definitions of the  
27 outcome (e.g. used in sensitivity analyses), we abstracted all information but considered only  
28 the main outcome for data analysis in this review. We also abstracted data on whether the  
29 codelist had been validated, and any description related to the handling of past or prevalent  
30 episodes of these outcomes. We considered that the study had attempted to validate the list  
31 of codes when the results were compared to data from another source, or when outcomes  
32 were confirmed by enquiring the patients' GP or by reviewing the patients' medical record.  
33 The data extraction process was repeated by a second author (HS) for 10% of the papers  
34 included for each outcome, to check for reliability in the extraction process.  
35  
36  
37  
38  
39  
40  
41

42 When a study did not provide the codelist for the definition of the outcome in the original  
43 publication or in a publicly available repository, we contacted the corresponding author of the  
44 study by email seeking this information (appendix 2). In the case of emails that could not be  
45 delivered to the corresponding author, we searched the contact of another study author,  
46 usually the first or the last author, and addressed the email to her/him; if this failed to be  
47 delivered, no further attempt of contact was made. For all delivered emails, if no response  
48 was received within two weeks, a follow up email was sent.  
49  
50  
51  
52  
53  
54

### 55 Data analysis

56 We produced descriptive tables showing the number and proportion of studies eligible for  
57 each outcome, by primary care database and codelist availability. We described, for each  
58  
59  
60

1  
2  
3 outcome, the types of codes used in the definition of the outcomes (e.g. diagnosis codes,  
4 symptom codes, prescription codes). The lists of codes were also reviewed to assess the  
5 clinical characteristics of the disorders included (e.g. whether mixed anxiety and depression  
6 was included in the definition of anxiety or depression); this was done by manually reviewing  
7 the list of codes to identify codes related to different clinical characteristics of the specific  
8 outcome. To describe the Read codes most commonly used to identify these outcomes in  
9 the data, we produced a list of Read codes sorted by number of studies that used the code.  
10  
11 The results of the validation studies described in the original papers were reported  
12 descriptively.  
13  
14  
15  
16  
17  
18  
19  
20  
21  
22  
23  
24  
25  
26  
27  
28  
29  
30  
31  
32  
33  
34  
35  
36  
37  
38  
39  
40  
41  
42  
43  
44  
45  
46  
47  
48  
49  
50  
51  
52  
53  
54  
55  
56  
57  
58  
59  
60

For peer review only

## Results

Of 5,946 records initially identified in the bibliographic references search, 2,979 were discarded as being duplicated, which left 2,967 records to be assessed for eligibility (Figure 1). The title assessment resulted in the exclusion of 2,485 records, and 482 studies were considered for full text assessment. Of these, 368 studies were excluded, mostly because they were abstracts from conferences or did not evaluate relevant outcomes. Six papers were identified from the screening of the references. A total of 120 studies were eligible for the systematic review. The results for each outcome are provided below.

### *Anxiety*

12 studies had anxiety as an outcome (Table 1, appendix table 3); of these, two studied panic only [2, 16]. The list of codes used to identify outcomes of anxiety was available for 5 of the 12 studies (41.7%); in one study, the cases of anxiety were identified in CPRD data linked to HES. All 12 studies included codes for diagnosis of anxiety, and 4 (33.3%) included also codes for anxiety symptoms. Prescriptions were considered in the definition of the outcome in 1 study only (8.3%).

Of the 5 studies for which codelists were available, 5 included codes for generalized anxiety disorder (100%), 4 for phobia (80.0%), 4 for panic disorder/attacks (80.0%), 3 for mixed anxiety and depression (60.0%), and 2 for stress-related disorders (40.0%) (Table 2). Codes for post-traumatic stress disorder and obsession-compulsion were less often included (1 study each, 20.0%).

Only one study reported including drugs prescriptions in the definition of the outcome [17]; this considered diazepam and lorazepam only (Table 3).

Two studies [2, 18] assessed the validity of the codelists (Table 4). The proportion of cases confirmed was reported in one study: 73.5% for cases treated with anxiolytics, antidepressants and hypnotics, and 89.6% in those not pharmacologically treated [18].

Appendix 11 provides the list of Read codes used to identify patients with anxiety in the eligible studies; appendix 20 provides the list of ICD-10 codes.

### *Depression*

42 studies identified outcomes of depression (Table 1, appendix table 4). The list of codes used to identify outcomes of depression was available for 17 of the 42 studies (40.5%); 2 studies identified cases of depression in primary care data linked to HES data, using ICD-10

1  
2  
3 codes. Six studies defined depression by proxy of antidepressants intake only; the remaining  
4 36 studies described to have included codes for diagnoses of depression and 6 (14.3%)  
5 studies also considered symptoms of depression in the definition of the outcome. 15 studies  
6 (35.7%) reported having excluded patients with history of depression.  
7  
8

9  
10 Of the 17 studies for which the codelists were available, 10 included codes for mixed anxiety  
11 and depression (58.8%), 4 for bipolar disorder (23.5%) and 3 for depression in dementia  
12 (17.6%) (Table 2).  
13

14 Antidepressant prescriptions, in isolation or combination with diagnostic/symptoms Read  
15 codes, were considered in the identification of patients with depression in 21 studies (50.0%);  
16 in 6 studies, depression was solely defined by the prescription of antidepressants (Table 3).  
17 The list of antidepressant categories was seldom provided; of the studies that reported this  
18 information, selective serotonin re-uptake inhibitors were the group most often considered (6  
19 studies), followed by monoamine-oxidase inhibitors and tricyclic and related antidepressants  
20 drugs (3 studies each).  
21

22 Five studies (11.9%) assessed the performance of the list of codes to identify patients with  
23 depression (Table 4). The proportion of cases confirmed was reported by two studies only:  
24 83.3% [19] and 89.6% [20].  
25

26 The list of Read codes used to identify patients with depression is provided in appendix 12;  
27 appendix 21 provides the list of ICD-10 codes.  
28  
29  
30  
31  
32  
33  
34  
35  
36

### 37 *Composite outcome of anxiety and depression*

38 Two studies provided data for composite outcomes of anxiety and depression (Table 1 and  
39 appendix table 5). The codelist was available for the two studies. The studies reported  
40 including codes for symptoms as well as diagnosis of anxiety and depression, and included  
41 prescriptions of antidepressants and antianxiety drugs in the definition of the outcome.  
42  
43

44 John et al. [21] compared the performance of 12 different algorithms to identify patients with  
45 anxiety and depression in the Secure Anonymised Information Linkage Databank (SAIL); the  
46 positive predictive value of the Read codes for anxiety and depression diagnoses, symptoms  
47 and treatments, against the five-item Mental Health Inventory (gold-standard), varied  
48 between 61% and 76% [21] (Table 4). The list of Read codes used to identify patients with  
49 composite outcomes of anxiety and depression is provided in appendix 13.  
50  
51  
52  
53  
54  
55  
56  
57  
58  
59  
60

### *Dementia and cognitive impairment*

27 studies reported outcomes of dementia or cognitive function (Table 1, appendix table 6). The codelists were available for 17 studies (63.0%); in two studies dementia was ascertained in primary care data linked to other sources of data. All studies included codes for diagnosis of dementia or cognitive impairment, and 6 studies (22.2%) reported to have included also codes for symptoms of dementia. 21 studies (77.8%) referred to have excluded patients with prior diagnoses of dementia from longitudinal analyses.

Of the 17 studies for which the codelists were available, 13 reported codes for Alzheimer's disease (81.3%), 13 for vascular dementia (81.3%), 12 for frontotemporal dementia (75.0%), and 11 for Lewy bodies disease (68.8%) (Table 2). Three studies reported data for cognitive impairment without dementia (17.6%).

Four studies (14.8%) used prescriptions in the identification of patients with dementia; all four included anticholinesterases and dopaminergic agents (Table 3).

Five studies [22-26] involved validation of the list of codes; the proportion of cases confirmed varied between 74% and 100% (Table 4).

The list of Read codes used in the studies is provided in appendix 14; the list of ICD-10 codes is provided in appendix 22.

### *Fatigue*

Six studies had fatigue as the outcome (Table 1, appendix table 7). All studies considered codes for diagnoses of fatigue, and 5 studies also described including codes for symptoms of fatigue. The list of codes use to identify patients with fatigue was provided in 3 studies (50.0%).

The three studies for which the codelist was available included codes for chronic fatigue syndrome, neurasthenia and post-viral fatigue syndrome (Table 2). Fibromyalgia was included in two studies (66.7%). None of the studies involved methods to assess the validity of the list of the codes. The list of Read codes used in the studies of fatigue is available in appendix 15.

### *Pain*

8 studies had pain as the outcome (Table 1, appendix table 8). The list of codes was available for 4 of the 8 studies. Of these 4 studies, three looked at pain by body site (i.e. chest, abdominal, musculoskeletal pain), one study studied widespread body pain (Table 2). Two studies included drugs in the identification of patients with pain; all considered anti-

1  
2  
3 epileptics (in the absence of codes for an epilepsy diagnosis), anaesthetics, antidepressants  
4 and analgesics (Table 3).

5  
6 Three studies validated the list of selection of the codes (Table 4). The proportion of cases  
7 confirmed varied between 56% and 86.4%. One study compared pain recorded in the EHR  
8 with pain reported in a survey; in 97% of the self-reported cases of pain, there was an entry  
9 in the EHR [27].  
10  
11

12  
13 Appendix 16 provides the list of codes used in the original studies.  
14  
15

### 16 17 *Sexual dysfunction*

18  
19 Six studies had sexual dysfunction as an outcome, all of which focused on male sexual  
20 dysfunction (Table 1, appendix table 9). Three studies provided codelists (50.0%). Of these,  
21 all included codes for erectile dysfunction and one study included codes for other male  
22 sexual dysfunctions (Table 2). Three studies included considered the prescription of drugs  
23 sufficient to ascertain the outcome; two studies considered phosphodiesterase type-5  
24 inhibitors (Table 3). No study involved methods to validate the list of codes used. The list of  
25 Read codes used in the original studies are available in appendix 17.  
26  
27  
28  
29  
30  
31

### 32 33 *Sleep disorders*

34  
35 Two studies were eligible for sleep disorders (Table 1, supplementary table 10); the two  
36 studies included diagnoses of insomnia, and one included hypersomnia as well (50%) (Table  
37 2). The list of codes was available for one study. No validation was reported. Appendix 18  
38 provides the list of Read codes used in the original study.  
39  
40  
41

### 42 43 *Fatal and non-fatal self-harm*

44  
45 41 studies had outcomes related to fatal and non-fatal self-harm (Table 1 and supplementary  
46 table 11). The list of codes used to defined the outcomes was available for 21 studies  
47 (51.2%); 9 studies reported using ICD-10 codes.  
48

49  
50 Of the 21 studies for which the codelist was available, 17 studies (80.9%) included  
51 completed suicide, while 4 studies focused on attempted suicide only (19.1%). Of the 17  
52 studies including completed suicide as an outcome, 8 reported only completed suicides, 6  
53 considered completed and attempted suicides and 4 included complete and attempted  
54 suicide, as well as self-harm (Table 2). All studies where outcomes were identified using  
55  
56  
57  
58  
59  
60

1  
2  
3 primary care data linked to ONS mortality data (gold-standard) considered deaths recorded  
4 as of undetermined intent in the definition of suicide.  
5

6  
7 Nine studies involved some method of validation of the list of cases identified via code  
8 search (Table 4). Four studies referred to have revised the clinical record of the patient to  
9 determine the final outcome and two studies asked the GPs to confirm the events. The  
10 proportion of cases confirmed varied between 21.2% and 97%. Hall et al [28] assessed the  
11 validity of cause of death recording in the THIN primary care database through search of the  
12 free text and death certificate review; the underlying cause of death registered in the death  
13 certificate was listed as the cause of death in the EHR in 70% of the cases. Thomas et al [29]  
14 compared the ascertainment of cases of suicide and self-harm using Read codes in CPRD,  
15 with those ascertained when data from HES and ONS mortality data were available. 26.1%  
16 of the cases of suicide identified in the ONS mortality data were registered in the CPRD  
17 primary care database. HES was considered the gold-standard for self-harm; 68.4% of the  
18 cases of self-harm in HES were identified as such in CPRD.  
19

20  
21 Appendix 19 provides the list of Read codes used to identify outcomes of fatal and non-fatal  
22 self-harm in primary care data; appendix 23 includes the lists of ICD-10 codes using in  
23 studies of linked data.  
24  
25  
26  
27  
28  
29  
30  
31  
32  
33  
34  
35  
36  
37  
38  
39  
40  
41  
42  
43  
44  
45  
46  
47  
48  
49  
50  
51  
52  
53  
54  
55  
56  
57  
58  
59  
60

## Discussion

### *Results overview*

This review summarised the definitions and combinations of codes used to identify outcomes of anxiety, depression, dementia and cognitive impairment, fatigue, pain, sexual dysfunction, sleep disorder and self-injurious behaviour in primary care databases of patients in the UK. The list of codes used in the original studies was obtained for approximately half of the papers. In the studies where the codelist was available, for all outcomes, there was substantial heterogeneity in the type of codes included (e.g. diagnoses and symptoms) and drugs selected to identify outcomes; for the remaining studies, the details provided in the original publications suggest a similar pattern. We also noted considerable variability in the clinical definition of some outcomes (e.g. inclusion/exclusion of bipolar disorders in studies of depression). Validation of methods used to identify these outcomes was rarely carried out; where done, positive predictive values of case definitions were variable but mostly above 80%.

### *Strengths and limitations*

This review is based on an extensive search of the studies involving EHRs in the UK. Errors in study selection and data extraction were minimized by the independent assessment of the studies by two investigators. We contacted the authors of all original studies where the list of codes had not been provided in the original publication to seek this information; this largely improved the number of studies for which lists of codes were available, and contributed to a more detailed characterisation of the methods used to defined mental health outcomes in primary care databases of EHR in the UK.

However, this review has limitations. Some relevant studies may have been missed due to imperfect search terms, as there is no MESH term for the primary care databases, and studies could be potentially missed if the keywords didn't appear in the title and abstract, or due to inaccurate indexing in the publications database. We attempted to minimise the risk of missing potential eligible studies by using broad search terms incorporating both indexing terms and keywords, two databases with different indexing systems, and an additional manual check of the eligible studies and list of bibliographic references from the main EHR databases. We only considered studies where mental health or quality of life variables were the outcomes of interest, limiting generalisability to other contexts. For example, we excluded studies where these variables were covariates because we expected that detailed



1  
2  
3 information about covariate definitions would rarely be available. We also excluded studies  
4 where the mental health or quality of life variable was used to define the patient population  
5 (e.g. a study of risk of stroke in depressed patients), on the basis that decisions about how to  
6 define cases may have had quite different motivations in this context, compared with studies  
7 where the condition was the outcome of the study, making case definitions difficult to  
8 meaningfully compare. We included studies that explicitly referred to using prescription data  
9 as a proxy for the definition of the condition (e.g. treated depression assessed by proxy of  
10 antidepressant intake), but we acknowledge that it was not always clear to decide whether  
11 treatment of the condition was being used to define the condition. This could have resulted in  
12 a few studies erroneously excluded, even though this should have been minimised by the  
13 duplication of the search and study selection process by two researchers working  
14 independently, with discussion of all discordant results. It is unclear if the list of codes that  
15 could not be obtained differ in any systematic way to the ones obtained. Some authors  
16 expressed concerns over intellectual property when sharing the list of codes, and this may  
17 have been a bigger concern among those who put a lot of time and thought into their  
18 codelists; on the other hand, authors who have concerns about the quality of their codelist  
19 may have been less willing to share them. Lastly, we summarised the types of codes used to  
20 define the outcome based on what was stated in individual studies' methods sections  
21 (because code lists were not available for all studies), but this may have been inaccurate: for  
22 example, some studies that reported in their methods only including diagnosis codes then  
23 provided code lists that appeared to also contain symptom codes.  
24  
25  
26  
27  
28  
29  
30  
31  
32  
33  
34  
35  
36  
37  
38  
39

#### 40 *Availability of the list of codes*

41 The list of codes was provided in the original publications for just over a quarter of the  
42 studies. Contacting the authors resulted in codelists being made available for approximately  
43 half of the studies. For the remaining studies, the authors either could not be contacted (e.g.  
44 moved institutions, retired) or could not locate the relevant codelist (including for some  
45 studies where the paper had stated that the codelist would be available on request).  
46 Provision of codelists within the publication or in a web repository would eliminate the  
47 difficulties of authors having to be contacted and archived codelists retrieved. Most journals  
48 currently accept codelists in supplementary appendices. Codelists were hardly ever obtained  
49 for older studies, especially those published before 2000, when email addresses were not  
50 routinely included in the details of the corresponding authors. We searched for alternative  
51 contacts in these cases, but not always successfully.  
52  
53  
54  
55  
56  
57  
58  
59  
60

### *Variability in the definition of cases and codelists*

#### Anxiety and depression

Anxiety was often defined with diagnostic and symptoms codes, and in a few studies by the prescription of anxiolytics and hypnotics. Even though the sensitivity of symptoms codes for anxiety is expected to be high, the positive predictive value is unknown. Anxiolytics may also result in misclassification of the outcomes, as they are currently discouraged as first line of treatment for anxiety [12] and are often prescribed for management of other conditions such as insomnia. No study considered antidepressants in the definition of anxiety even though these are currently used to manage anxiety [12]; this may have resulted in cases of anxiety treated with antidepressants, and where no Read code was available, being missed.

The inclusion/exclusion of codes for symptoms may have a larger impact in the definition of depression, as it has been shown that GPs switched from diagnostic to symptoms codes after the introduction of performance indicators in the GP contract quality and outcomes framework in 2006 [11] and under claims that depression was being over diagnosed [30, 31]. Codelists solely relying on Read codes for diagnosis of depression are therefore likely to have low sensitivity, but the impact of including/excluding a specific code will be variable, depending on how often that code is used by GPs at the point of providing care. In a few studies, depression was defined by proxy of antidepressant prescribing, alone or in combination with Read codes for symptoms/diagnosis. Considering antidepressant prescribing in the definition of depression has several issues. Certain types of antidepressants are currently used as first line of treatment for other conditions, such as pain and anxiety, and the studies relying solely on this information will be affected by misclassification of the outcome; some studies took this into account by excluding low dose tricyclic antidepressants, usually prescribed for pain, from their list of codes used to define depression [32-34]. Amongst the studies that did include antidepressants in their definition, there was heterogeneity in the group of antidepressants included, with some studies selecting only a few specific drugs commonly used for the treatment of depression. Studies defining depression by proxy of antidepressant prescribing only are likely also to be affected by changes in the behaviour of antidepressant prescribing. In 2004, the National Institute for Clinical Excellence (NICE) issue guidelines discouraging antidepressants for mild depression [35], and in 2006 a performance indicator in the UK GP Quality and Outcomes Framework (QOF) pay for performance [36] was introduced for depression severity assessed with validated symptoms questionnaires. Following this measure, the proportion of new cases of pharmacologically treated depression decreased (from 73% in 2003 to 61% in 2012 [37]), but the proportion of recurrent episodes pharmacologically treated increased from 74.3% to

1  
2  
3 77.8% [37]. Treatment duration times with antidepressants also increased over time [38]; this  
4 may affect the number of new episodes of depression identified in the studies. In several  
5 studies, the authors chose to report separate results for antidepressant prescribing, without  
6 using this information to ascertain the outcome of depression [39, 40]; this may partially be  
7 due to the difficulties of ascertaining the indications for which antidepressants were  
8 described. John et al, 2016 explored the indications of antidepressants; more than half of the  
9 new antidepressant prescriptions were for depression, with increasing but low incidence of  
10 prescriptions for pain and anxiety, but the authors could not identify the indication for  
11 antidepressants in 17% of the new prescriptions [41].

12  
13  
14  
15  
16  
17  
18  
19  
20  
21  
22  
23  
24  
25  
26  
27  
28  
29  
30  
31  
32  
33  
34  
35  
36  
37  
38  
39  
40  
41  
42  
43  
44  
45  
46  
47  
48  
49  
50  
51  
52  
53  
54  
55  
56  
57  
58  
59  
60  
Regardless of the type of codes included, authors will need to often choose the  
inclusion/exclusion of codes relating to the clinical profile of the patients. This may have a  
particular impact for conditions that are highly co-morbid. For example, the code for 'mixed  
anxiety and depression' was sometimes used in the definition of anxiety and in the definition  
of depression; anxiety and depression are highly co-morbid and the inclusion/exclusion of  
these patients may have an impact on the results. In addition, for depression, the inclusion of  
codes related to depression in the context of bipolar disease, dementia and schizophrenia  
may raise issues as to whether it represents a primary depressive episode.

Part of the heterogeneity in the list of codes used to identify these outcomes may be  
explained by the complexity of these conditions and by the purpose for which these data are  
collected. Electronic health care data are primarily collected to provide patients with  
treatment, and distinctions between diagnosis and symptoms may have less weight at the  
point of care than when researchers aim to define these conditions using data routinely  
collected.

#### Fatal and non-fatal self-harm

Routinely collected primary care data was shown to have low sensitivity to detect cases of  
suicide [29]. Thus, record linkage to ONS mortality data is of interest; this has the advantage  
of including causes of death other than suicide. Ascertainment of the cause of death is not  
always straightforward when the death is non-natural, and several studies have included  
cases of accidents and open verdicts in their case definition. Open verdicts have been shown  
to include many similarities with suicides, and several are later registered as suicides; these  
are recommended to be included in studies of suicide [42]. Studies varied on whether cases  
of self-harm without suicidal ideation were included (e.g. Rubino et al reviewed free text to  
exclude those who did not seem to have attempted suicide [43]). For self-harm, linkage to  
HES data will allow for more cases to be identified [29], even though authors must consider

1  
2  
3 the balance between reduction of sample size and ascertainment of the outcome, as linkage  
4 is only available for a subset of patients.  
5

### 6 Pain

7  
8  
9 The aetiology and location of pain in the studies involved in this review varied due to our  
10 broad inclusion criteria. When pharmacological treatment was included in the definition of  
11 pain, this was most often done with prescriptions of antidepressants and anti-epileptics.  
12 Antidepressants such as first generation tricyclic antidepressants have been used for over 30  
13 years to manage neuropathic pain (e.g. amitriptyline, doxepin, clomipramine and dosulepin)  
14 [44]. The dosages needed to treat pain are generally lower than the ones to treat depression  
15 [44]. Antiepileptic drugs reduce neuronal excitability and alleviate pain through several  
16 mechanisms [44].  
17  
18  
19  
20  
21

### 22 Other outcomes

23  
24 We considered cognitive impairment and dementia as a composite outcome; 10% and 20%  
25 of all patients with mild cognitive impairment are expected to convert to dementia [45, 46].  
26 Fewer studies had fatigue, sexual dysfunction and sleep disorders as the outcome, and no  
27 study was eligible for female sexual dysfunction. The definition of these outcomes varied little  
28 across the studies but the small numbers preclude firm conclusions. It has been reported that  
29 chronic fatigue increased prior to 2001 [3], but decreased during 2001 and 2013, possibly  
30 due to the introduction of diagnostic criteria from NICE [47]; increases were noted in the  
31 diagnoses of fibromyalgia [48]. This may reflect the complexity of diagnosing fatigue, which is  
32 done by exclusion of other causes only [47].  
33  
34  
35  
36  
37  
38  
39  
40  
41

### 42 *Validation*

43 Information on outcomes identified in EHRs may be affected by lack of validity: a person  
44 meeting the operational definition for the outcome based on specific codes may not have the  
45 diagnosis or vice-versa. Only a small number of studies assessed validity in their studies,  
46 and this was almost always about assessing positive predictive value of the case definition,  
47 with sensitivity and specificity rarely explored. Of these, some studies only stated that  
48 validation had been carried out, but did not report the results, which makes the performance  
49 of the case definition unclear. However, the studies that reported results tended to show a  
50 high proportion of cases confirmed by their primary care physician or by further investigations  
51 (i.e. a high positive predictive value). This is in accordance with the results of two systematic  
52 reviews that assessed the validity of the diagnostic coding within the CPRD primary care  
53 database [8, 9]. Studies in which identified cases were validated by the GP did not usually  
54  
55  
56  
57  
58  
59  
60

1  
2  
3 specify how this validation was done – i.e. whether the GPs confirmed cases by consulting  
4 the EHR, referring to additional information, relying on memory, or using other methods. If  
5 GPs simply checked the same EHR used to identify the case in the first place, resulting  
6 estimates of positive predictive value would be expected to be high, but may be misleadingly  
7 optimistic.  
8  
9  
10

### 11 12 13 14 *Implications*

15 Mental health and quality of life-related outcomes are difficult to identify in EHR databases  
16 and thus extra care needs to be used when defining these outcomes. The use of a particular  
17 code varies between GP practices; for example, a study on the inter-practice use of Read  
18 codes for diabetes showed that the most generic code was used in 14% to 98% of the  
19 patients with diabetes in the practice [49]; it is reasonable that this pattern applies to other  
20 conditions. GPs can derive Read codes for their practice; this may raise issues with new  
21 codes being added over time [50], and codelists that need to be updated. It is important that  
22 authors clearly document the process of selection of the codes, so that these are available  
23 with clear rationale if needed [5]. Some studies of depression and dementia referred to using  
24 the Read codes recommended by the QOF [36]; these are likely to be highly specific. It is  
25 also important to better understand the patterns of recording of some of these conditions, as  
26 changes in the patterns of use of the codes may have impact in the list of codes chosen. The  
27 inclusion of codes for symptoms and prescriptions must consider what is known about the  
28 use of codes by GPs at the point of patient providing care, as data recording in this setting is  
29 primarily intended to support clinical care.  
30  
31  
32  
33  
34  
35  
36  
37  
38

39 Validation of the outcomes appears to be essential to understand the validity of case  
40 definitions. A balance between sensitivity and specificity may be considered depending on  
41 the aim of the study [5]; for depression, for example, the inclusion of terms such as ‘Low  
42 mood’ may increase sensitivity, at the expense of decreased specificity, as some individuals  
43 who would not fit more stringent criteria for a diagnosis will be incorrectly classified as  
44 depressed [5]. Studies might consider to use internal validation strategies, by assessing the  
45 proportion of patients referred for treatment or prescribed a relevant pharmacological agent.  
46  
47  
48  
49

50 Despite the difficulties of assessing each separate outcome, we must take into account that  
51 mental health disorder symptoms often overlap, and is difficult to disentangle what is  
52 attributable to each condition. Lastly, these conditions have a long period of exposure to  
53 medication after symptoms have disappeared, besides a high probability of relapse and  
54 recurrence [51], which may raise issues on whether the condition is incident or prevalent.  
55  
56  
57  
58  
59  
60

## Conclusions

Detailed information about codes used to identify mental health and quality of life outcomes in UK primary care databases was unavailable for around half of studies of these outcomes. Where available, there was substantial heterogeneity in the list of codes used to ascertain cases. Most studies did not validate case definitions, though when this was done, positive predictive values were generally high. Future studies should fully report outcomes definitions and seek to validate the list of codes used to identify these outcomes.

For peer review only

1  
2  
3 **Authors' contributions**

4 HC, RW and KB designed the study. HC and HS screened the bibliographic references and  
5 performed data extraction. HC wrote the first draft of the article. All authors revised the article  
6 for important intellectual content and agreed with the final version.  
7  
8  
9

10  
11  
12  
13  
14  
15  
16  
17  
18  
19  
20  
21  
22  
23  
24  
25  
26  
27  
28  
29  
30  
31  
32  
33  
34  
35  
36  
37  
38  
39  
40  
41  
42  
43  
44  
45  
46  
47  
48  
49  
50  
51  
52  
53  
54  
55  
56  
57  
58  
59  
60

For peer review only

## References

1. Jick SS, HM Kremers, and C Vasilakis-Scaramozza. Isotretinoin use and risk of depression, psychotic symptoms, suicide, and attempted suicide. *Arch Dermatol* 2000;136:1231-6.
2. Meier CR, K Wilcock, and SS Jick. The risk of severe depression, psychosis or panic attacks with prophylactic antimalarials. *Drug Saf* 2004;27:203-13.
3. Gallagher AM, JM Thomas, WT Hamilton, and PD White. Incidence of fatigue symptoms and diagnoses presenting in UK primary care from 1990 to 2001. *J R Soc Med* 2004;97:571-5.
4. Hall GC, SV Morant, D Carroll, ZL Gabriel, et al. An observational descriptive study of the epidemiology and treatment of neuropathic pain in a UK general population. *BMC Fam Pract* 2013;14:28.
5. Dave S and I Petersen. Creating medical and drug code lists to identify cases in primary care databases. *Pharmacoepidemiol Drug Saf* 2009;18:704-7.
6. Gulliford MC, J Charlton, M Ashworth, AG Rudd, et al. Selection of medical diagnostic codes for analysis of electronic patient records. Application to stroke in a primary care database. *PLoS One* 2009;4:e7168.
7. Ranopa M, I Douglas, T van Staa, L Smeeth, et al. The identification of incident cancers in UK primary care databases: a systematic review. *Pharmacoepidemiol Drug Saf* 2015;24:11-8.
8. Herrett E, SL Thomas, WM Schoonen, L Smeeth, et al. Validation and validity of diagnoses in the General Practice Research Database: a systematic review. *Br J Clin Pharmacol* 2010;69:4-14.
9. Khan NF, SE Harrison, and PW Rose. Validity of diagnostic coding within the General Practice Research Database: a systematic review. *Br J Gen Pract* 2010;60:e128-36.
10. Herrett E, AM Gallagher, K Bhaskaran, H Forbes, et al. Data Resource Profile: Clinical Practice Research Datalink (CPRD). *Int J Epidemiol* 2015;44:827-36.
11. Kendrick T, B Stuart, C Newell, AW Geraghty, et al. Changes in rates of recorded depression in English primary care 2003-2013: Time trend analyses of effects of the economic recession, and the GP contract quality outcomes framework (QOF). *J Affect Disord* 2015;180:68-78.
12. National Institute for Health and Care Excellence (NICE), *Generalised anxiety disorder and panic disorder in adults: management (CG113)*, 2011.
13. Moore RA, S Derry, D Aldington, P Cole, et al. Amitriptyline for neuropathic pain in adults. *Cochrane Database Syst Rev* 2015:CD008242.
14. Lurie A. Obstructive sleep apnea in adults: epidemiology, clinical presentation, and treatment options. *Adv Cardiol* 2011;46:1-42.



15. Szabo ST, MJ Thorpy, G Mayer, JH Peever, et al. Neurobiological and immunogenetic aspects of narcolepsy: Implications for pharmacotherapy. *Sleep Med Rev* 2018;43:23-36.
16. Fardet L, I Petersen, and I Nazareth. Suicidal behavior and severe neuropsychiatric disorders following glucocorticoid therapy in primary care. *Am J Psychiatry* 2012;169:491-7.
17. Bouras G, SR Markar, EM Burns, HA Mackenzie, et al. Linked Hospital and Primary Care Database Analysis of the Incidence and Impact of Psychiatric Morbidity Following Gastrointestinal Cancer Surgery in England. *Ann Surg* 2016;264:93-9.
18. Martin-Merino E, A Ruigomez, MA Wallander, S Johansson, et al. Prevalence, incidence, morbidity and treatment patterns in a cohort of patients diagnosed with anxiety in UK primary care. *Fam Pract* 2010;27:9-16.
19. Yang CC, SS Jick, and H Jick. Lipid-lowering drugs and the risk of depression and suicidal behavior. *Arch Intern Med* 2003;163:1926-32.
20. Martin-Merino E, A Ruigomez, S Johansson, MA Wallander, et al. Study of a cohort of patients newly diagnosed with depression in general practice: prevalence, incidence, comorbidity, and treatment patterns. *Prim Care Companion J Clin Psychiatry* 2010;12:PCC 08m00764.
21. John A, J McGregor, D Fone, F Dunstan, et al. Case-finding for common mental disorders of anxiety and depression in primary care: an external validation of routinely collected data. *BMC Med Inform Decis Mak* 2016;16:35.
22. Imfeld P, YB Brauchli Pernus, SS Jick, and CR Meier. Epidemiology, co-morbidities, and medication use of patients with Alzheimer's disease or vascular dementia in the UK. *J Alzheimers Dis* 2013;35:565-73.
23. Imfeld P, M Bodmer, SS Jick, and CR Meier. Benzodiazepine Use and Risk of Developing Alzheimer's Disease or Vascular Dementia: A Case-Control Analysis. *Drug Saf* 2015;38:909-19.
24. Dunn N, C Holmes, and M Mullee. Does lithium therapy protect against the onset of dementia? *Alzheimer Dis Assoc Disord* 2005;19:20-2.
25. Strom BL, R Schinnar, J Karlawish, S Hennessy, et al. Statin Therapy and Risk of Acute Memory Impairment. *JAMA Intern Med* 2015;175:1399-405.
26. Dunn N, M Mullee, VH Perry, and C Holmes. Association between dementia and infectious disease: evidence from a case-control study. *Alzheimer Dis Assoc Disord* 2005;19:91-4.
27. Mansfield KE, J Sim, P Croft, and KP Jordan. Identifying patients with chronic widespread pain in primary care. *Pain* 2017;158:110-119.
28. Hall GC. Validation of death and suicide recording on the THIN UK primary care database. *Pharmacoepidemiol Drug Saf* 2009;18:120-31.
29. Thomas KH, N Davies, C Metcalfe, F Windmeijer, et al. Validation of suicide and self-harm records in the Clinical Practice Research Datalink. *Br J Clin Pharmacol* 2013;76:145-57.

- 1
- 2
- 3 30. Dowrick C and A Frances. Medicalising unhappiness: new classification of depression
- 4 risks more patients being put on drug treatment from which they will not benefit. *BMJ*
- 5 2013;347:f7140.
- 6
- 7 31. Spence D. Are antidepressants overprescribed? Yes. *BMJ* 2013;346:f191.
- 8
- 9 32. Smith DJ, H Court, G McLean, D Martin, et al. Depression and multimorbidity: a
- 10 cross-sectional study of 1,751,841 patients in primary care. *J Clin Psychiatry*
- 11 2014;75:1202-8; quiz 1208.
- 12
- 13 33. Agur K, G McLean, K Hunt, B Guthrie, et al. How Does Sex Influence Multimorbidity?
- 14 Secondary Analysis of a Large Nationally Representative Dataset. *Int J Environ Res*
- 15 *Public Health* 2016;13:391.
- 16
- 17 34. Cooper SA, G McLean, B Guthrie, A McConnachie, et al. Multiple physical and
- 18 mental health comorbidity in adults with intellectual disabilities: population-based
- 19 cross-sectional analysis. *BMC Fam Pract* 2015;16:110.
- 20
- 21 35. National Institute for Health and Care Excellence (NICE), *Depression - Management*
- 22 *of depression in primary and secondary care. Clinical Guideline 23, 2004.*
- 23
- 24 36. BMA and NHS Employers, *Revisions to the GMS contract 2006/07. Delivering*
- 25 *investment in general practice.*
- 26
- 27 37. Kendrick T, B Stuart, C Newell, AW Geraghty, et al. Did NICE guidelines and the
- 28 Quality Outcomes Framework change GP antidepressant prescribing in England?
- 29 Observational study with time trend analyses 2003-2013. *J Affect Disord*
- 30 2015;186:171-7.
- 31
- 32 38. Moore M, HM Yuen, N Dunn, MA Mullee, et al. Explaining the rise in antidepressant
- 33 prescribing: a descriptive study using the general practice research database. *BMJ*
- 34 2009;339:b3999.
- 35
- 36 39. Khan NF, AM Ward, E Watson, and PW Rose. Consulting and prescribing behaviour
- 37 for anxiety and depression in long-term survivors of cancer in the UK. *Eur J Cancer*
- 38 2010;46:3339-44.
- 39
- 40 40. Sheehan R, A Hassiotis, K Walters, D Osborn, et al. Mental illness, challenging
- 41 behaviour, and psychotropic drug prescribing in people with intellectual disability: UK
- 42 population based cohort study. *BMJ* 2015;351:h4326.
- 43
- 44 41. John A, AL Marchant, DL Fone, JI McGregor, et al. Recent trends in primary-care
- 45 antidepressant prescribing to children and young people: an e-cohort study. *Psychol*
- 46 *Med* 2016;46:3315-3327.
- 47
- 48 42. Linsley KR, K Schapira, and TP Kelly. Open verdict v. suicide - importance to
- 49 research. *Br J Psychiatry* 2001;178:465-8.
- 50
- 51 43. Rubino A, N Roskell, P Tennis, D Mines, et al. Risk of suicide during treatment with
- 52 venlafaxine, citalopram, fluoxetine, and dothiepin: retrospective cohort study. *BMJ*
- 53 2007;334:242.
- 54
- 55 44. Ryder S and Stannard C. Treatment of chronic pain: antidepressant, antiepileptic and
- 56 antiarrhythmic drugs. *Continuing Education in Anaesthesia Critical Care & Pain*
- 57 2005;5:18-21.
- 58
- 59
- 60

- 1  
2  
3 45. Alegret M, G Cuberas-Borros, G Vinyes-Junque, A Espinosa, et al. A two-year follow-  
4 up of cognitive deficits and brain perfusion in mild cognitive impairment and mild  
5 Alzheimer's disease. *J Alzheimers Dis* 2012;30:109-20.  
6  
7 46. Morris JC and J Cummings. Mild cognitive impairment (MCI) represents early-stage  
8 Alzheimer's disease. *J Alzheimers Dis* 2005;7:235-9; discussion 255-62.  
9  
10 47. National Institute for Health and Care Excellence (NICE), *Chronic fatigue*  
11 *syndrome/myalgic encephalomyelitis (or encephalopathy): diagnosis and treatment*  
12 *(CG53)*, 2007.  
13  
14 48. Collin SM, IJ Bakken, I Nazareth, E Crawley, et al. Trends in the incidence of chronic  
15 fatigue syndrome and fibromyalgia in the UK, 2001-2013: a Clinical Practice  
16 Research Datalink study. *J R Soc Med* 2017;110:231-244.  
17  
18 49. Gray J, D Orr, and A Majeed. Use of Read codes in diabetes management in a south  
19 London primary care group: implications for establishing disease registers. *BMJ*  
20 2003;326:1130.  
21  
22 50. Shephard E, S Stapley, and W Hamilton. The use of electronic databases in primary  
23 care research. *Fam Pract* 2011;28:352-4.  
24  
25 51. National Institute for Health and Care Excellence (NICE), *Depression in adults with a*  
26 *chronic physical health problem: recognition and management (CG91)*, 2009.  
27  
28  
29  
30  
31  
32  
33  
34  
35  
36  
37  
38  
39  
40  
41  
42  
43  
44  
45  
46  
47  
48  
49  
50  
51  
52  
53  
54  
55  
56  
57  
58  
59  
60

**Table 1. Characteristics of the studies included in the systematic review.**

|                                                           | Anxiety |       | Depression |       | Anxiety and depression (composite outcome) |       | Dementia/ cognitive impairment |       | Fatigue |       | Pain |       | Sexual dysfunction (male) |       | Sleep disorders |       | Fatal and non-fatal self-harm |       |
|-----------------------------------------------------------|---------|-------|------------|-------|--------------------------------------------|-------|--------------------------------|-------|---------|-------|------|-------|---------------------------|-------|-----------------|-------|-------------------------------|-------|
|                                                           | N       | %     | N          | %     | N                                          | %     | N                              | %     | N       | %     | N    | %     | N                         | %     | N               | %     | N                             | %     |
| <b>Total number of studies</b>                            | 12      | 100.0 | 42         | 100.0 | 2                                          | 100.0 | 27                             | 100.0 | 6       | 100.0 | 8    | 100.0 | 6                         | 100.0 | 2               | 100.0 | 41                            | 100.0 |
| <b>Main primary care database</b>                         |         |       |            |       |                                            |       |                                |       |         |       |      |       |                           |       |                 |       |                               |       |
| CPRD                                                      | 7       | 58.3  | 24         | 57.1  | 0                                          | 0.0   | 21                             | 77.8  | 5       | 83.3  | 5    | 62.5  | 4                         | 66.7  | 1               | 50.0  | 31                            | 75.6  |
| PCCIU                                                     | 0       | 0.0   | 1          | 2.4   | 0                                          | 0.0   | 0                              | 0.0   | 0       | 0.0   | 0    | 0.0   | 0                         | 0.0   | 0               | 0.0   | 0                             | 0.0   |
| THIN                                                      | 5       | 41.7  | 10         | 23.8  | 1                                          | 50.0  | 5                              | 18.5  | 1       | 16.7  | 0    | 0.0   | 2                         | 33.3  | 0               | 0.0   | 6                             | 14.6  |
| Other                                                     | 0       | 0.0   | 7          | 16.7  | 1                                          | 50.0  | 1                              | 3.7   | 0       | 0.0   | 3    | 37.5  | 0                         | 0.0   | 1               | 50.0  | 4                             | 9.8   |
| <b>Outcome ascertained using linked data (HES or ONS)</b> |         |       |            |       |                                            |       |                                |       |         |       |      |       |                           |       |                 |       |                               |       |
| Yes                                                       | 1       | 8.3   | 2          | 4.8   | 0                                          | 0.0   | 2                              | 7.4   | 0       | 0.0   | 0    | 0.0   | 0                         | 0.0   | 0               | 0.0   | 9                             | 22.0  |
| No                                                        | 11      | 91.7  | 40         | 95.2  | 2                                          | 100.0 | 25                             | 92.6  | 6       | 100.0 | 8    | 100.0 | 6                         | 100.0 | 2               | 100.0 | 32                            | 78.0  |
| <b>Code list availability</b>                             |         |       |            |       |                                            |       |                                |       |         |       |      |       |                           |       |                 |       |                               |       |
| Total number of studies with code lists available         | 5       | 41.7  | 17         | 40.5  | 2                                          | 100.0 | 17                             | 63.0  | 3       | 50.0  | 4    | 50.0  | 3                         | 50.0  | 1               | 50.0  | 21                            | 51.2  |
| Stated in publication                                     | 2       | 16.7  | 7          | 16.7  | 1                                          | 50.0  | 10                             | 37.0  | 1       | 16.7  | 2    | 25.0  | 2                         | 33.3  | 1               | 50.0  | 17                            | 41.5  |
| Cited another paper or web repository                     | 0       | 0.0   | 0          | 0.0   | 0                                          | 0.0   | 0                              | 0.0   | 0       | 0.0   | 1    | 12.5  | 0                         | 0.0   | 0               | 0.0   | 0                             | 0.0   |
| Obtained from authors                                     | 3       | 25.0  | 10         | 23.8  | 1                                          | 50.0  | 7                              | 25.9  | 2       | 33.3  | 1    | 12.5  | 1                         | 16.7  | 0               | 0.0   | 4                             | 9.8   |
| Total number of studies with code lists not available     | 7       | 58.3  | 25         | 59.5  | 0                                          | 0.0   | 10                             | 37.0  | 3       | 50.0  | 4    | 50.0  | 3                         | 50.0  | 1               | 50.0  | 20                            | 48.8  |
| Cited another paper or web repository but couldn't obtain | 1       | 8.3   | 1          | 2.4   | 0                                          | 0.0   | 1                              | 3.7   | 1       | 16.7  | 0    | 0.0   | 0                         | 0.0   | 0               | 0.0   | 3                             | 7.3   |
| Stated available on request but didn't provide            | 2       | 16.7  | 4          | 9.5   | 0                                          | 0.0   | 3                              | 11.1  | 2       | 33.3  | 0    | 0.0   | 1                         | 16.7  | 1               | 50.0  | 0                             | 0.0   |
| Not mentioned in the paper and didn't provide             | 4       | 33.3  | 19         | 45.2  | 0                                          | 0.0   | 6                              | 22.2  | 0       | 0.0   | 4    | 50.0  | 2                         | 33.3  | 0               | 0.0   | 17                            | 41.5  |
| <b>Type of codes available †</b>                          |         |       |            |       |                                            |       |                                |       |         |       |      |       |                           |       |                 |       |                               |       |
| Read/medical codes                                        | 5       | 100.0 | 14         | 82.4  | 2                                          | 100.0 | 17                             | 100.0 | 3       | 100.0 | 4    | 100.0 | 3                         | 100.0 | 1               | 100.0 | 8                             | 42.1  |
| OXMIS codes                                               | 0       | 0.0   | 3          | 17.6  | 0                                          | 0.0   | 0                              | 0.0   | 0       | 0.0   | 2    | 50.0  | 0                         | 0.0   | 0               | 0.0   | 8                             | 42.1  |
| ICD codes                                                 | 1       | 20.0  | 2          | 4.8   | 0                                          | 0.0   | 2                              | 11.7  | 0       | 0.0   | 0    | 0.0   | 0                         | 0.0   | 0               | 0.0   | 9                             | 47.4  |

|                                                             | Anxiety |       | Depression |    | Anxiety and depression (composite outcome) |      | Dementia/cognitive impairment |       | Fatigue |    | Pain  |      | Sexual dysfunction (male) |       | Sleep disorders |   | Fatal and non-fatal self-harm |     |      |       |     |       |       |     |    |      |
|-------------------------------------------------------------|---------|-------|------------|----|--------------------------------------------|------|-------------------------------|-------|---------|----|-------|------|---------------------------|-------|-----------------|---|-------------------------------|-----|------|-------|-----|-------|-------|-----|----|------|
|                                                             | N       | %     | N          | %  | N                                          | %    | N                             | %     | N       | %  | N     | %    | N                         | %     | N               | % | N                             | %   |      |       |     |       |       |     |    |      |
| <b>Definition of the outcome †</b>                          |         |       |            |    |                                            |      |                               |       |         |    |       |      |                           |       |                 |   |                               |     |      |       |     |       |       |     |    |      |
| Study described that codes for diagnosis were included      |         |       |            |    |                                            |      |                               |       |         |    |       |      |                           |       |                 |   |                               |     |      |       |     |       |       |     |    |      |
| Yes [in isolation*]                                         | 12      | 100.0 | [5]        | 37 | 88.1                                       | [14] | 2                             | 100.0 | [0]     | 27 | 100.0 | [19] | 6                         | 100.0 | [1]             | - | -                             | 5   | 83.3 | [2]   | 2   | 100.0 | [2]   | -   | -  |      |
| No                                                          | 0       | 0.0   |            | 5  | 11.9                                       |      | 0                             | 0.0   |         | 0  | 0.0   |      | 0                         | 0.0   |                 | - | -                             | 1   | 16.7 |       | 0   | 0.0   |       | -   | -  |      |
| Unclear                                                     | 0       | 0.0   |            | 0  | 0.0                                        |      | 0                             | 0.0   |         | 0  | 0.0   |      | 0                         | 0.0   |                 | - | -                             | 0   | 0.0  |       | 0   | 0.0   |       | -   | -  |      |
| Study described that codes for symptoms were included       |         |       |            |    |                                            |      |                               |       |         |    |       |      |                           |       |                 |   |                               |     |      |       |     |       |       |     |    |      |
| Yes [in isolation*]                                         | 4       | 33.3  | [0]        | 6  | 14.3                                       | [0]  | 2                             | 100.0 | [0]     | 6  | 22.2  | [0]  | 5                         | 83.3  | [0]             | 8 | 100.0                         | [6] | 0    | 0.0   | [0] | 0     | 0.0   | [0] | -  | -    |
| No                                                          | 6       | 50.0  |            | 33 | 78.6                                       |      | 0                             | 0.0   |         | 20 | 74.1  |      | 1                         | 16.7  |                 | 0 | 0.0                           |     | 4    | 66.7  |     | 2     | 100.0 |     | -  | -    |
| Unclear                                                     | 2       | 16.7  |            | 3  | 7.1                                        |      | 0                             | 0.0   |         | 1  | 3.7   |      | 0                         | 0.0   |                 | 0 | 0.0                           |     | 2    | 33.3  |     | 0     | 0.0   |     | -  | -    |
| Study described that prescriptions were included            |         |       |            |    |                                            |      |                               |       |         |    |       |      |                           |       |                 |   |                               |     |      |       |     |       |       |     |    |      |
| Yes [in isolation*]                                         | 1       | 8.3   | [0]        | 21 | 50.0                                       | [6]  | 2                             | 100.0 | [0]     | 4  | 14.8  | [0]  | 0                         | 0.0   | [0]             | 2 | 25.0                          | [0] | 3    | 50.0  | [1] | 0     | 0.0   | [0] | -  | -    |
| No                                                          | 11      | 91.7  |            | 21 | 50.0                                       |      | 0                             | 0.0   |         | 23 | 85.2  |      | 6                         | 100.0 |                 | 6 | 75.0                          |     | 3    | 50.0  |     | 2     | 100.0 |     | -  | -    |
| Unclear                                                     | 0       | 0.0   |            | 0  | 0.0                                        |      | 0                             | 0.0   |         | 0  | 0.0   |      | 0                         | 0.0   |                 | 0 | 0.0                           |     | 0    | 0.0   |     | 0     | 0.0   |     | -  | -    |
| <b>Handling of outcomes occurring prior to study period</b> |         |       |            |    |                                            |      |                               |       |         |    |       |      |                           |       |                 |   |                               |     |      |       |     |       |       |     |    |      |
| Excluded                                                    | 5       | 41.7  |            | 15 | 35.7                                       |      | 0                             | 0.0   |         | 21 | 77.8  |      | 3                         | 50.0  |                 | 3 | 37.5                          |     | 1    | 16.7  |     | 1     | 50.0  |     | 7  | 17.1 |
| Adjusted/matched for                                        | 2       | 16.7  |            | 8  | 19.0                                       |      | 0                             | 0.0   |         | 1  | 3.7   |      | 1                         | 16.7  |                 | 0 | 0.0                           |     | 3    | 50.0  |     | 0     | 0.0   |     | 10 | 24.4 |
| Stratified results                                          | 1       | 8.3   |            | 3  | 7.1                                        |      | 2                             | 100.0 |         | 0  | 0.0   |      | 1                         | 16.7  |                 | 0 | 0.0                           |     | 3    | 50.0  |     | 0     | 0.0   |     | 4  | 9.8  |
| Not stated                                                  | 3       | 25.0  |            | 11 | 26.2                                       |      | 0                             | 0.0   |         | 1  | 3.7   |      | 0                         | 0.0   |                 | 3 | 37.5                          |     | 0    | 0.0   |     | 1     | 50.0  |     | 15 | 36.6 |
| Not applicable **                                           | 2       | 16.7  |            | 8  | 19.0                                       |      | 0                             | 0.0   |         | 4  | 14.8  |      | 2                         | 33.3  |                 | 2 | 25.0                          |     | 0    | 0.0   |     | 0     | 0.0   |     | 9  | 22.0 |
| <b>Validation of list of codes</b>                          |         |       |            |    |                                            |      |                               |       |         |    |       |      |                           |       |                 |   |                               |     |      |       |     |       |       |     |    |      |
| Yes                                                         | 2       | 16.7  |            | 5  | 11.9                                       |      | 1                             | 50.0  |         | 5  | 18.5  |      | 0                         | 0.0   |                 | 3 | 37.5                          |     | 0    | 0.0   |     | 0     | 0.0   |     | 9  | 22.0 |
| None stated                                                 | 10      | 83.3  |            | 37 | 88.1                                       |      | 1                             | 50.0  |         | 22 | 81.5  |      | 6                         | 100.0 |                 | 5 | 62.5                          |     | 6    | 100.0 |     | 2     | 100.0 |     | 32 | 78.0 |
| Study aiming at validating the outcome                      | 0       | 0.0   |            | 0  | 0.0                                        |      | 1                             | 50.0  |         | 0  | 0.0   |      | 0                         | 0.0   |                 | 0 | 0.0                           |     | 0    | 0.0   |     | 0     | 0.0   |     | 3  | 7.3  |

1 † Defined based on the description of the outcome provided in the original studies. Studies were considered to have included symptoms in the definition of the  
2 outcomes when this information was explicitly stated by the authors. Pain was considered a symptomatic outcome, regardless of how it was described in the  
3 original publications.  
4

5 \* The number of studies where the definition of the outcome included only this category of codes is provided in squared brackets.  
6

7 ‡ Refers only to studies providing codelists. A study may include more than one type of codes.  
8

9 \*\* Depends on study design and outcome. For example, it includes studies describing the epidemiology of first ever diagnoses or focusing on completed  
10 suicide only.  
11

12 CPRD – The Clinical Practice Research Datalink; HES – Hospital Episodes Statistics; ICD – International Classification of Diseases; ONS – Office for National  
13 Statistics; OXMIS – Oxford Medical Information System; PCCIU – Primary Care Clinical Informatics Unit Research Data Set; THIN – The Health Improvement  
14 Network.  
15  
16  
17  
18  
19  
20  
21  
22  
23  
24  
25  
26  
27  
28  
29  
30  
31  
32  
33  
34  
35  
36  
37  
38  
39  
40  
41  
42  
43  
44  
45  
46

**Table 2.** Clinical characteristics of the outcomes of interest in the studies for which the list of codes was available.

| Study included codes for:                      | N         | (% of total with code lists available) |
|------------------------------------------------|-----------|----------------------------------------|
| <b>Anxiety</b>                                 | <b>5</b>  | <b>100.0</b>                           |
| Generalized anxiety disorder                   | 5         | 100.0                                  |
| Panic disorder/attacks                         | 4         | 80.0                                   |
| Phobia                                         | 4         | 80.0                                   |
| Mixed anxiety and depression                   | 3         | 60.0                                   |
| Stress-related disorders                       | 2         | 40.0                                   |
| Obsession-compulsion                           | 1         | 20.0                                   |
| Post-traumatic stress disorder                 | 1         | 20.0                                   |
| <b>Depression</b>                              | <b>17</b> | <b>100.0</b>                           |
| Unipolar depression                            | 17        | 100.0                                  |
| Depression with psychotic symptoms             | 14        | 82.4                                   |
| Mixed anxiety and depression                   | 10        | 58.8                                   |
| Bipolar disorder                               | 4         | 23.5                                   |
| Depression in dementia                         | 3         | 17.6                                   |
| <b>Dementia / cognitive impairment</b>         | <b>17</b> | <b>100.0</b>                           |
| Alzheimer's disease                            | 13        | 81.3                                   |
| Vascular dementia                              | 13        | 81.3                                   |
| Frontotemporal dementia                        | 12        | 75.0                                   |
| Lewy Bodies disease                            | 11        | 68.8                                   |
| Mild cognitive impairment only                 | 3         | 17.6                                   |
| <b>Fatigue</b>                                 | <b>3</b>  | <b>100.0</b>                           |
| Chronic fatigue syndrome/ myalgic encephalitis | 3         | 100.0                                  |
| Neurasthenia                                   | 3         | 100.0                                  |
| Post viral fatigue syndrome                    | 3         | 100.0                                  |
| Fibromyalgia                                   | 2         | 66.7                                   |
| <b>Pain</b>                                    | <b>4</b>  | <b>100.0</b>                           |
| Chest pain                                     | 1         | 25.0                                   |
| Chronic widespread pain                        | 1         | 25.0                                   |
| Musculoskeletal pain                           | 1         | 25.0                                   |
| Unspecified abdominal pain                     | 1         | 25.0                                   |
| <b>Sexual dysfunction (male)</b>               | <b>3</b>  | <b>100.0</b>                           |
| Erectile dysfunction                           | 3         | 100.0                                  |
| Other male sexual dysfunctions                 | 1         | 33.3                                   |
| <b>Sleep disorder</b>                          | <b>1</b>  | <b>100.0</b>                           |
| Insomnia                                       | 1         | 100.0                                  |
| Hypersomnia                                    | 1         | 100.0                                  |
| <b>Fatal and non-fatal self-harm</b>           | <b>21</b> | <b>100.0</b>                           |
| <b>Completed suicide</b>                       | <b>17</b> | <b>80.9</b>                            |
| Completed suicide only                         | 8         | 38.1                                   |
| Completed and attempted suicide only           | 6         | 28.6                                   |
| Completed and attempted suicide, and self-harm | 4         | 19.1                                   |
| Included deaths of undetermined intent         | 7         | 33.3                                   |
| <b>Attempted suicide / self-harm</b>           | <b>4</b>  | <b>19.1</b>                            |

**Table 3.** Pharmacological categories used in the studies that used drug prescriptions to identify patients with the outcome of interest.

| <b>Outcome</b>                                                                                           | <b>Number of studies</b> | <b>%</b>     |
|----------------------------------------------------------------------------------------------------------|--------------------------|--------------|
| <b>Anxiety</b>                                                                                           | <b>12</b>                | <b>100.0</b> |
| Studies of anxiety that used drugs prescriptions only                                                    | 0                        | 0.0          |
| Studies of anxiety that used drugs prescriptions<br>Diazepam and lorazepam                               | 1                        | 8.3          |
|                                                                                                          | 1                        | 8.3          |
| <b>Depression</b>                                                                                        | <b>42</b>                | <b>100.0</b> |
| Studies of depression that used drugs prescriptions only                                                 | 6                        | 14.3         |
| Studies of depression that used drugs prescriptions<br>Antidepressants, categories not further specified | 21                       | 50.0         |
| Antidepressants, categories further specified                                                            | 15                       | 35.7         |
| Tricyclic and related antidepressant drugs                                                               | 6                        | 14.3         |
| Monoamine-oxidase inhibitors                                                                             | 3                        | 7.1          |
| Selective serotonin re-uptake inhibitors                                                                 | 3                        | 7.1          |
| Other antidepressant drugs                                                                               | 6                        | 14.3         |
|                                                                                                          | 3                        | 7.1          |
| <b>Dementia</b>                                                                                          | <b>27</b>                | <b>100.0</b> |
| Studies of dementia that used drugs prescriptions only                                                   | 0                        | 0.0          |
| Studies of dementia that used drugs prescriptions<br>Anticholinesterases                                 | 4                        | 14.8         |
| Dopaminergic drugs                                                                                       | 4                        | 14.8         |
|                                                                                                          | 4                        | 14.8         |
| <b>Pain</b>                                                                                              | <b>8</b>                 | <b>100.0</b> |
| Studies of pain that used drugs prescriptions only                                                       | 2                        | 25.0         |
| Studies of pain that used drugs prescriptions<br>Analgesics, not otherwise specified                     | 2                        | 25.0         |
| Antidepressants                                                                                          | 2                        | 25.0         |
| Anti-epileptics                                                                                          | 2                        | 25.0         |
| Anaesthetics                                                                                             | 2                        | 25.0         |
| <b>Sexual dysfunction (male)</b>                                                                         | <b>6</b>                 | <b>100.0</b> |
| Studies of sexual dysfunction that used drugs prescriptions only                                         | 1                        | 16.7         |
| Studies of sexual dysfunction that used drugs prescriptions<br>Phosphodiesterase type-5 inhibitors       | 3                        | 50.0         |
| Prostaglandin analogues and prostamides                                                                  | 2                        | 33.3         |
|                                                                                                          | 1                        | 16.7         |



**Table 4.** Methods and results of the validation of the outcomes reported in the original studies.

| Outcome and study authors                         | Validation method                                                                                 | # case validations completed/<br># case validations attempted | % of cases confirmed                                                                                                                                                  |
|---------------------------------------------------|---------------------------------------------------------------------------------------------------|---------------------------------------------------------------|-----------------------------------------------------------------------------------------------------------------------------------------------------------------------|
| <b>Anxiety</b>                                    |                                                                                                   |                                                               |                                                                                                                                                                       |
| Martin-Merino 2010                                | GP Questionnaire                                                                                  | 135/140                                                       | Among pharmacologically treated: 73.5%;<br>Among not pharmacologically treated: 89.6%.                                                                                |
| Meier 2004                                        | Record review                                                                                     | nr/nr                                                         | nr                                                                                                                                                                    |
| <b>Depression</b>                                 |                                                                                                   |                                                               |                                                                                                                                                                       |
| Becker, 2011                                      | Sensitivity analysis with different definitions                                                   | nr/nr                                                         | nr                                                                                                                                                                    |
| Hagberg, 2016                                     | Record review                                                                                     | nr/nr                                                         | nr                                                                                                                                                                    |
| Martin-Merino, 2010                               | GP questionnaire                                                                                  | 135/140                                                       | 89.6%                                                                                                                                                                 |
| Meier, 2004                                       | Record review                                                                                     | nr/nr                                                         | nr                                                                                                                                                                    |
| Yang, 2003                                        | Record review                                                                                     | 30/nr                                                         | 83.3%                                                                                                                                                                 |
| <b>Anxiety and depression (composite outcome)</b> |                                                                                                   |                                                               |                                                                                                                                                                       |
| John, 2016                                        | Compared 12 EHR algorithms to results of the Mental Health Inventory (MHI-5), a subscale of SF-36 | 2,799*                                                        | Between 61% and 76%, depending on the algorithm.                                                                                                                      |
| <b>Dementia/ cognitive impairment</b>             |                                                                                                   |                                                               |                                                                                                                                                                       |
| Imfeld, 2015 & Imfeld, 2013                       | GP questionnaire                                                                                  | nr/120                                                        | Alzheimer's disease: 79%;<br>Vascular dementia: 74%.                                                                                                                  |
| Dunn, 2005                                        | GP asked to confirm diagnosis                                                                     | 50/200                                                        | 100%                                                                                                                                                                  |
| Dunn, 2005                                        | GP questionnaire                                                                                  | 95/~100                                                       | 83%                                                                                                                                                                   |
| Strom, 2015                                       | GP questionnaire                                                                                  | 86/100                                                        | 88.4%                                                                                                                                                                 |
| Strom, 2015                                       | Review of free text                                                                               | 1047/1048                                                     | 1.5% patients excluded as not having the diagnosis; 42.4% confirmed as having definite memory loss, 36.8% possible memory loss, 3.2% undetermined, and 16.0% unknown. |
| <b>Pain</b>                                       |                                                                                                   |                                                               |                                                                                                                                                                       |
| Hall, 2013                                        | GP questionnaire                                                                                  | 48/54                                                         | 56%                                                                                                                                                                   |
| Mansfield, 2017                                   | EHR data linked to self-reported pain status collected by postal questionnaire                    | 1780*                                                         | 97%                                                                                                                                                                   |
| Becker, 2008                                      | GP questionnaire                                                                                  | 176/200                                                       | 86.4%                                                                                                                                                                 |

| Outcome and study authors                | Validation method                                                                                                                                                                   | # case validations completed/<br># case validations attempted | % of cases confirmed                                                                                  |
|------------------------------------------|-------------------------------------------------------------------------------------------------------------------------------------------------------------------------------------|---------------------------------------------------------------|-------------------------------------------------------------------------------------------------------|
| <b>Self-harm</b>                         |                                                                                                                                                                                     |                                                               |                                                                                                       |
| Thomas, 2012                             | Comparison of cases of suicide and self-harm identified in CPRD with Read codes, with the cases identified in CPRD data linked to HES data, and published self-harm incidence data. | 74236*                                                        | 68.4%                                                                                                 |
| <b>Suicide (attempted and completed)</b> |                                                                                                                                                                                     |                                                               |                                                                                                       |
| Hagberg, 2016                            | Record review                                                                                                                                                                       | nr/nr                                                         | nr                                                                                                    |
| Haste, 1998                              | GP asked to confirm suicides                                                                                                                                                        | 77% of uncertain deaths/nr                                    | 82%                                                                                                   |
| Jick, 1995                               | Record review                                                                                                                                                                       | nr/nr                                                         | nr                                                                                                    |
| Meier, 2004                              | Record review                                                                                                                                                                       | nr/nr                                                         | nr                                                                                                    |
| Schuerch, 2016                           | Outcomes identified in CPRD were compared to those identified in CPRD linked to HES and ONS data.                                                                                   | nr/nr                                                         | Compared to CPRD data, the frequency of the outcomes in linked data was approximately 3 times higher. |
| Yang, 2003                               | Record review                                                                                                                                                                       | 30/nr                                                         | 83.3%                                                                                                 |
| <b>Suicide (completed)</b>               |                                                                                                                                                                                     |                                                               |                                                                                                       |
| Arana, 2010                              | GP questionnaire and record review                                                                                                                                                  | nr/132                                                        | 97%                                                                                                   |
| Arana, 2010                              | GP questionnaire and record review                                                                                                                                                  | nr/86                                                         | 87%                                                                                                   |
| Hall, 2009                               | GP questionnaire and record review                                                                                                                                                  | 33/33                                                         | 21.2%                                                                                                 |
| Thomas, 2012                             | Comparison of cases of suicide and self-harm identified in CPRD with Read codes, with the cases identified in CPRD data linked to ONS mortality data, and national suicide rates.   | 1767*                                                         | 59.7% for men;<br>46.0% for women.                                                                    |

CPRD – Clinical Practice Research Datalink; EHR – electronic health records; GP – general practitioner; HES – Hospital Episode Statistics; nr – not reported; MHI-5 - Mental Health Inventory 5 items; ONS – Office for National Statistics; SF-36 – 36-item Short Form Health Survey.

\* Validation attempted and completed for all patients identified in electronic health records database.

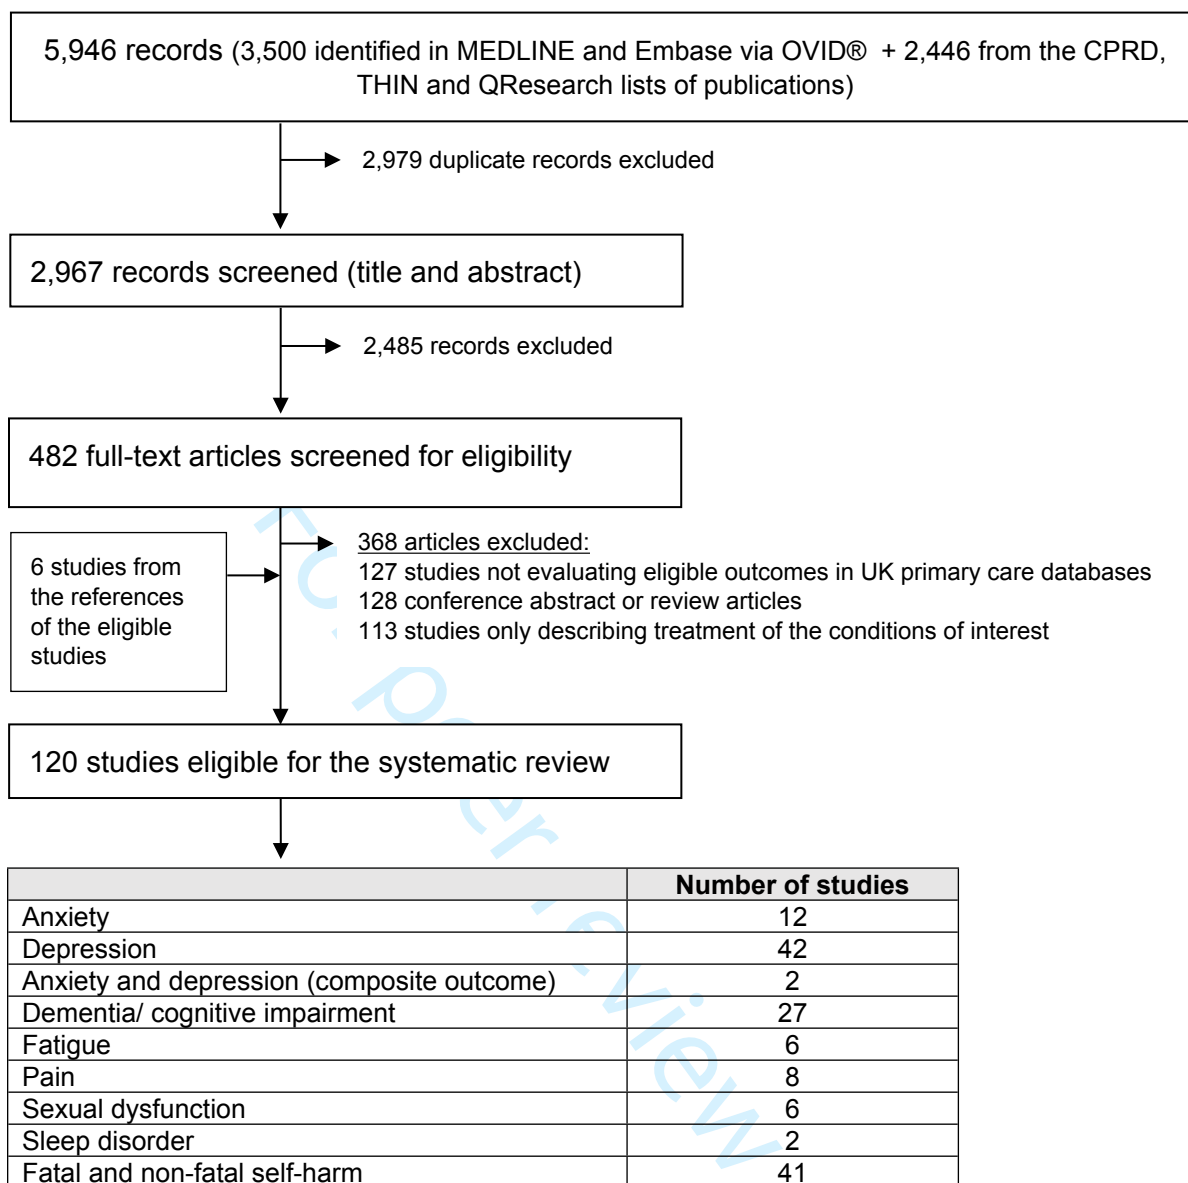

Figure 1.

## Systematic review flowchart.

## Appendix 1.

### MEDLINE search expression, applied via OVID, 28 June 2018

1. CPRD.mp.
2. Clinical Practice Research.mp.
3. GPRD.mp.
4. General Practice Research Database.mp.
5. The Health Improvement Network.mp.
6. QRESEARCH.mp.
7. DIN-LINK.mp.
8. VAMP.mp.
9. Value Added Information Medical.mp.
10. (THIN adj1 (database or dataset or data)).mp.
11. (Read adj1 (term\* or code# or codification)).mp.
12. (diagnostic adj1 (term\* or code#)).mp.
13. Disease Analyzer.mp.
14. Primary care clinical informatics unit.mp.
15. PCCIU.mp.
16. (optimum patient care adj4 data\*).mp. [mp=title, abstract, original title, name of substance word, subject heading word, floating sub-heading word, keyword heading word, protocol supplementary concept word, rare disease supplementary concept word, unique identifier, synonyms]
17. OPCRD.mp.
18. health information network.mp.
19. health improvement network.mp.
20. Q research.mp.
21. (ResearchOne or (Research One adj2 data\*)).mp. [mp=title, abstract, original title, name of substance word, subject heading word, floating sub-heading word, keyword heading word, protocol supplementary concept word, rare disease supplementary concept word, unique identifier, synonyms]
22. Doctors Independent Network.mp.
23. SAIL.mp.
24. (SAIL adj4 data\*).mp. [mp=title, abstract, original title, name of substance word, subject heading word, floating sub-heading word, keyword heading word, protocol supplementary concept word, rare disease supplementary concept word, unique identifier, synonyms]
25. mediplus.mp.
26. ((general practice or primary care or primary health care) adj4 data\*).mp.
27. longitudinal patient database.mp.
28. ((EHR or electronic health record\*) adj4 data\*).mp. [mp=title, abstract, original title, name of substance word, subject heading word, floating sub-heading word, keyword heading word, protocol supplementary concept word, rare disease supplementary concept word, unique identifier, synonyms]
29. health care database\*.mp.
30. exp "mental disorders"/
31. exp "behavior and behavior mechanisms"/
32. exp "behavioral disciplines and activities"/
33. exp Psychological Phenomena/
34. exp fatigue/
35. exp pain/
36. exp "Sleep Wake Disorders"/
37. exp central nervous system depressants/
38. exp muscle relaxants, central/
39. exp psychotropic drugs/
40. exp sleep aids, pharmaceutical/

41. (anxiety or anxious\* or panic or anxiolytic\* or (stress not oxidat\*) or depressi\* or dysthymia or antidepress\* or sexual or erectile or suicid\* or self-harm or hopeless\* or sleep or insomnia or hypnotic\* or cognit\* or chemo-fog or chemo-brain or pain or fatigue or (mental adj1 (disorder or disorders)) or antipsychotic).mp.
42. 30 or 31 or 32 or 33 or 34 or 35 or 36 or 37 or 38 or 39 or 40 or 41
43. exp United Kingdom/
44. (UK or Britain or British or England or English or Scotland or Scottish or Wales or Welsh Ireland).mp.
45. 43 or 44
46. or/1-29
47. 42 and 45 and 46

### EMBASE search expression, applied via OVID, 28 June 2018

1. CPRD.mp.
2. Clinical Practice Research.mp.
3. GPRD.mp.
4. General Practice Research Database.mp.
5. The Health Improvement Network.mp.
6. QRESEARCH.mp.
7. DIN-LINK.mp.
8. VAMP.mp.
9. Value Added Information Medical.mp.
10. (THIN adj1 (database or dataset or data)).mp.
11. (Read adj1 (term\* or code# or codification)).mp.
12. (diagnostic adj1 (term\* or code#)).mp.
13. Disease Analyzer.mp.
14. Primary care clinical informatics unit.mp.
15. PCCIU.mp.
16. (optimum patient care adj4 data\*).mp.
17. OPCRd.mp.
18. health information network.mp.
19. health improvement network.mp.
20. Q research.mp.
21. (ResearchOne or (Research One adj2 data\*)).mp.
22. Doctors Independent Network.mp.
23. SAIL.mp.
24. (SAIL adj4 data\*).mp.
25. mediplus.mp.
26. ((general practice or primary care or primary health care) adj4 data\*).mp.
27. longitudinal patient database.mp.
28. ((EHR or electronic health record\*) adj4 data\*).mp.
29. health care database\*.mp.
30. or/1-29
31. UK.mp.
32. United Kingdom.mp.
33. England.mp.
34. Wales.mp.
35. Scotland.mp.
36. Northern Ireland.mp.
37. 31 or 32 or 33 or 34 or 35 or 36

- 1
- 2
- 3 38. exp central depressant agent/
- 4 39. exp central muscle relaxant/
- 5 40. exp psychotropic agent/
- 6 41. antidepress\*.mp.
- 7 42. antipsychotic.mp.
- 8 43. anxiolytic.mp.
- 9 44. exp mental capacity/ or exp mental compliance/ or exp mental concentration/ or exp
- 10 mental deficiency/ or exp mental deterioration/ or exp mental development/ or exp mental
- 11 development assessment/ or exp mental disease/ or exp mental disease assessment/ or exp
- 12 mental dissociation/ or mental function/ or exp mental health/ or exp mental health care/ or
- 13 exp mental health center/ or exp mental health organization/ or exp mental health research/
- 14 or exp mental health service/ or exp mental hospital/ or exp mental stress/
- 15 45. depressi\*.mp.
- 16 46. dysthymia.mp.
- 17 47. catatonia.mp.
- 18 48. self-injur\*.mp.
- 19 49. self injury.mp.
- 20 50. self mutilation.mp.
- 21 51. suicid\*.mp.
- 22 52. self-harm.mp.
- 23 53. anxious\*.mp.
- 24 54. anxiety.mp.
- 25 55. panic.mp.
- 26 56. catastroph\*.mp.
- 27 57. phobia.mp.
- 28 58. phobic.mp.
- 29 59. neurotic.mp.
- 30 60. compulsive.mp.
- 31 61. bipolar.mp.
- 32 62. neurotic.mp.
- 33 63. personality.mp.
- 34 64. psychotic.mp.
- 35 65. psychosis.mp.
- 36 66. paranoid.mp.
- 37 67. delusional.mp.
- 38 68. sexual.mp.
- 39 69. insomnia.mp.
- 40 70. exp insomnia/
- 41 71. exp sleep/ or exp sleep disorder/
- 42 72. exp somatoform disorder/
- 43 73. exp substance abuse/ or exp "substance use"/
- 44 74. exp stress/
- 45 75. or/38-74
- 46 76. 30 and 37 and 75
- 47
- 48
- 49
- 50
- 51
- 52
- 53
- 54
- 55
- 56
- 57
- 58
- 59
- 60

1  
2  
3 **Appendix 2. Template email sent to corresponding authors of the studies for which a**  
4 **list of codes wasn't provided in the publication.**  
5  
6  
7  
8  
9

10 Dear [corresponding author],  
11  
12

13 I'm currently doing a PhD about mental health and quality of life in breast cancer survivors.  
14 As part of my PhD, I'm conducting a systematic review of the studies that assessed mental  
15 health outcomes using electronic health records. The aim of the review is to summarise how  
16 studies have identified these outcomes in primary care databases in the UK; the review will  
17 be part of my PhD thesis and we are also planning to publish it in a peer-reviewed journal in  
18 due course.  
19  
20  
21  
22

23 I'm writing to you because a study in which you are the corresponding author was identified  
24 as eligible (please see title below), and I would kindly ask if you could be of assistance with  
25 the issues described below.  
26  
27  
28

29 [title]

30 [description of the list of codes needed]  
31  
32  
33

34 I look forward to hearing from you and thank you in advance for your help.  
35  
36

37 Best wishes,  
38

39 Helena  
40  
41  
42  
43  
44  
45  
46  
47  
48  
49  
50  
51  
52  
53  
54  
55  
56  
57  
58  
59  
60

Appendix table 3. Main characteristics of the eligible studies: anxiety.

| Author, year of publication | Study title                                                                                                                                                        | Type of study        | Database(s) | Study period (years) | Outcome description                                                                                                                                                                     | List of codes available | Validation of list of codes | EHR-related eligibility criteria for the study // Follow up requirements                                                                                                                           | Handling of outcomes occurring prior to exposure                                                                     | Notes                                                                               |
|-----------------------------|--------------------------------------------------------------------------------------------------------------------------------------------------------------------|----------------------|-------------|----------------------|-----------------------------------------------------------------------------------------------------------------------------------------------------------------------------------------|-------------------------|-----------------------------|----------------------------------------------------------------------------------------------------------------------------------------------------------------------------------------------------|----------------------------------------------------------------------------------------------------------------------|-------------------------------------------------------------------------------------|
| Bouras, 2016 [1]            | Linked and primary care database analysis of the incidence and impact of psychiatric morbidity following gastrointestinal cancer surgery in England                | Cohort study         | CPRD, HES   | 1997-2012            | "Diagnosis code [for anxiety] in CPRD or HES, or a prescription code [for Diazepam or Lorazepam] between 36 months before and 12 months after surgery."                                 | Yes                     | None stated                 | Data available for >3 years before the index date // Follow up duration: 1 year after index date                                                                                                   | Study quantified the psychiatric morbidity before and after the index date.                                          | -                                                                                   |
| Fardet, 2012 [2]            | Suicidal behavior and severe neuropsychiatric disorders following glucocorticoid therapy in primary care                                                           | Cohort study         | THIN        | 1990-2008            | Read and Multilex list of codes for diagnoses of panic disorder or panic attack <u>excluding</u> c odes for anxiety                                                                     | No                      | None stated                 | ≥6 months of registration with the primary care practice                                                                                                                                           | Hazards ratios adjusted for past history of neuropsychiatric disorders (yes/no)                                      | Outcome was eligible if there was no record of the outcome in the previous 6 months |
| Granerod, 2016 [3]          | Increased rates of sequelae post-encephalitis in individuals attending primary care practices in the United Kingdom: a population-based retrospective cohort study | Cohort study         | CPRD        | 1998-2012            | "Anxiety disorders (including both symptom codes and diagnoses such as generalised anxiety disorder, panic disorder, post-traumatic stress disorder and obsessive compulsive disorder)" | Yes                     | None stated                 | None stated // At least one contact with the GP practice in the two years after the index date                                                                                                     | Analysis restricted to those at risk of a new-onset outcome, defined as no code in the year prior to the index date. | -                                                                                   |
| Hesdorffer, 2012 [4]        | Epilepsy, suicidality, and psychiatric disorders: a bidirectional association                                                                                      | Matched cohort study | CPRD        | 1990-2008            | Anxiety, not further specified                                                                                                                                                          | No                      | None stated                 | At least 3 years of data before the index date, 1 year after the index date, and at least 1 code for a medical or drug code in the 6 months before the index // Follow up 3 years after index date | Excluded subjects with a record of the outcome before the study date.                                                | -                                                                                   |



| Author, year of publication | Study title                                                                                                               | Type of study             | Database(s) | Study period (years) | Outcome description                                                                                                                                                                                                        | List of codes available                                 | Validation of list of codes         | EHR-related eligibility criteria for the study // Follow up requirements                                                                                                                                            | Handling of outcomes occurring prior to exposure                                                                                                         | Notes                                                                      |
|-----------------------------|---------------------------------------------------------------------------------------------------------------------------|---------------------------|-------------|----------------------|----------------------------------------------------------------------------------------------------------------------------------------------------------------------------------------------------------------------------|---------------------------------------------------------|-------------------------------------|---------------------------------------------------------------------------------------------------------------------------------------------------------------------------------------------------------------------|----------------------------------------------------------------------------------------------------------------------------------------------------------|----------------------------------------------------------------------------|
| Khan, 2010 [5]              | Consulting and prescribing behaviour for anxiety and depression in long-term survivors of cancer in the UK                | Cohort study              | CPRD        | 2003-2006            | Consultations for anxiety and prescriptions of benzodiazepines and Buspirone                                                                                                                                               | No                                                      | None stated                         | None stated                                                                                                                                                                                                         | History of anxiety prior to the analysis period included in the models                                                                                   | Outcomes occurred within a 3-year period chosen for the study              |
| Kurd, 2005 [6]              | The risk of depression, anxiety, and suicidality in patients with psoriasis: A population-based cohort study              | Cohort study              | CPRD        | 1987-2002            | "clinician diagnosis of anxiety and related disorders in which anxiety symptoms are common"                                                                                                                                | No<br>(refers using the same codes of previous studies) | None stated                         | None stated                                                                                                                                                                                                         | Patients with history of anxiety in the 6 months before the index date were excluded in a sensitivity analysis.                                          | -                                                                          |
| Lurie, 2015 [7]             | Antibiotic exposure and the risk for depression, anxiety, or psychosis: A nested case-control study                       | Nested case control study | THIN        | 1995-2013            | Anxiety, including codes for diagnosis of generalised anxiety disorder and phobic anxiety                                                                                                                                  | Yes                                                     | None stated                         | Only records from patients that had been registered with the GP for more than 183 days // Outcomes were considered incident if occurring at more than 183 days after the index date.                                | Patients who had pharmacological treatment for a specific psychiatric diagnosis more than 90 days before the diagnosis was first recorded were excluded. | Patients with mixed anxiety and depression were excluded from the analysis |
| Martin-Merino, 2010 [8]     | Prevalence, incidence, morbidity and treatment patterns in a cohort of patients diagnosed with anxiety in UK primary care | Cohort study              | THIN        | 2002-2004            | "Identification codes included all Read codes describing anxiety. These included codes ranging from mild anxiousness symptoms to other disorders such as phobia, panic attack and generalized and mixed anxiety disorders" | Yes                                                     | Yes<br>Record review/questionnaires | Enrolled for at least 2 years with the practice and have received one prescription in the previous year; patients aged $\geq 70$ years had to have at least 2 visits registered in the follow up period of >1 year. | Patients with previous anxiety diagnoses were excluded, as well as those who had 5 or more prescriptions of anxiolytics before the diagnosis.            | -                                                                          |

| Author, year of publication | Study title                                                                                                                                       | Type of study             | Database(s) | Study period (years) | Outcome description                                                                                                 | List of codes available | Validation of list of codes                                                | EHR-related eligibility criteria for the study // Follow up requirements                                                                                                                      | Handling of outcomes occurring prior to exposure                                                                                | Notes                                          |
|-----------------------------|---------------------------------------------------------------------------------------------------------------------------------------------------|---------------------------|-------------|----------------------|---------------------------------------------------------------------------------------------------------------------|-------------------------|----------------------------------------------------------------------------|-----------------------------------------------------------------------------------------------------------------------------------------------------------------------------------------------|---------------------------------------------------------------------------------------------------------------------------------|------------------------------------------------|
| Meier, 2004 [9]             | The risk of severe depression, psychosis or panic attacks with prophylactic antimalarials                                                         | Cohort study              | CPRD        | 1990-1999            | First time diagnosis of panic attack, regardless of referral or treatment, identified by OXMIS- and/or- ICD-8-codes | No                      | Yes<br><br>'reviewed a list of all cases to determine inclusion/exclusion' | ≥1 year of data available before index date and "some GPRD activity (diagnoses or prescriptions) recorded after the index date"<br>//<br>Patients were censored 18 months after exposure date | "The base population for person-time analyses consisted of all subjects free of (...) panic attacks at the start of follow up." | -                                              |
| Schneider, 2013 [10]        | Antimalarial chemoprophylaxis and the risk of neuropsychiatric disorders                                                                          | Nested case control study | CPRD        | 2001-2009            | Incident diagnosis of anxiety, not further specified                                                                | No                      | None stated                                                                | At least 1 year of date before the index date<br>//<br>some activity (diagnoses or prescriptions) recorded after the index date                                                               | Excluded patients with the outcome of interest observed before the index date                                                   | -                                              |
| Sheehan, 2015 [11]          | Mental illness, challenging behaviour, and psychotropic drug prescribing in people with intellectual disability: UK population based cohort study | Cohort study              | THIN        | 1999-2013            | Anxiety, including codes for symptoms and diagnoses                                                                 | Yes                     | None stated                                                                | Entry in the cohort at least one year after registration with the practice                                                                                                                    | None stated                                                                                                                     | Excludes cases of mixed anxiety and depression |

| Author, year of publication | Study title                                                                      | Type of study | Database(s) | Study period (years) | Outcome description                                                                                                                                                                                                                                                                                                                                                       | List of codes available | Validation of list of codes | EHR-related eligibility criteria for the study // Follow up requirements                                                                                                                                                                                                                                          | Handling of outcomes occurring prior to exposure                           | Notes                                                                                                                              |
|-----------------------------|----------------------------------------------------------------------------------|---------------|-------------|----------------------|---------------------------------------------------------------------------------------------------------------------------------------------------------------------------------------------------------------------------------------------------------------------------------------------------------------------------------------------------------------------------|-------------------------|-----------------------------|-------------------------------------------------------------------------------------------------------------------------------------------------------------------------------------------------------------------------------------------------------------------------------------------------------------------|----------------------------------------------------------------------------|------------------------------------------------------------------------------------------------------------------------------------|
| Walters, 2012 [12]          | Recent trends in the incidence of anxiety diagnoses and symptoms in primary care | Cohort study  | THIN        | 1998-2008            | Anxiety, including symptoms, diagnosis, mixed anxiety and depression, panic attacks and panic disorder<br><br>Results were also provided separately for:<br>- anxiety disorders (eg. chronic anxiety, generalised anxiety disorder, anxiety state);<br>- anxiety symptoms (e.g. 'anxiousness');<br>- mixed anxiety and depression;<br>- panic attacks and panic disorder. | No                      | None stated                 | ≥1 year of data since registration with the practice and 'consistent recording of at least one medical record (e.g. a diagnostic entry), one additional health data record (e.g. blood test result) and >1 prescriptions on average for the practice per patient per year and consistent reporting of mortality.' | Excluded patients with an entry for anxiety recorded in the previous year. | Participants could have had more than one episode during the follow up, provided that they were separated for more than 12 months. |

CPRD – Clinical Practice Research Datalink; HES – Hospital Episodes Statistics; ICD-10 – International Classification of Diseases, edition 10; ND – not defined; OXMIS – Oxford Medical Information System; PCCIU – Primary Care Clinical Informatics Unit Research; THIN – The Health Improvement Network.

Appendix table 4. Main characteristics of the eligible studies: depression.

| Author,<br>year of<br>publication | Study title                                                                                             | Type of study                            | Database(s) | Study<br>period<br>(years) | Outcome description                                                                                                                                                                                                                                                                           | List of<br>codes<br>available | Validation<br>of list of<br>codes | EHR-related<br>eligibility criteria<br>for the study<br>//<br>Follow up<br>requirements | Handling of<br>outcomes<br>occurring prior<br>to exposure                                                                                                                 | Notes                                                                                                                      |
|-----------------------------------|---------------------------------------------------------------------------------------------------------|------------------------------------------|-------------|----------------------------|-----------------------------------------------------------------------------------------------------------------------------------------------------------------------------------------------------------------------------------------------------------------------------------------------|-------------------------------|-----------------------------------|-----------------------------------------------------------------------------------------|---------------------------------------------------------------------------------------------------------------------------------------------------------------------------|----------------------------------------------------------------------------------------------------------------------------|
| Becker,<br>2011 [13]              | Risk of incident depression in patients with Parkinson disease in the UK                                | Nested case-control study                | CPRD        | 1994-2005                  | 'To be included in the analysis as a valid depression case, a patient had to have a code recorded for an affective disorder (depression, manic disorders, bipolar disorders, or unspecified affective disorders) during follow-up.'                                                           | Yes                           | Yes                               | At least 3 years of computer EHR prior to the index date<br>//<br>None stated.          | Cases who had depression diagnosed prior to the index date were excluded;                                                                                                 | -                                                                                                                          |
| Booth, 2015<br>[14]               | Impact of bariatric surgery on clinical depression. Interrupted time series study with matched controls | Controlled interrupted time-series study | CPRD        | 2000-2012                  | Clinical depression was identified through medical diagnoses for depression recorded in clinical or referral records as well as through prescriptions for anti-depressant drugs.                                                                                                              | Yes                           | None stated                       | At least one year of registration with the practice prior to the index date             | Not applicable                                                                                                                                                            | -                                                                                                                          |
| Bornand,<br>2016 [15]             | The risk of new onset depression in association with influenza - A population-based observational study | Nested case-control study                | CPRD        | 2000-2013                  | Minimum of three prescriptions for one or more antidepressant drugs recorded after the incident major depression diagnosis (i.e. the index date), identified by READ-codes based on ICD-10 codes (F32), if they started the antidepressant therapy within 90 days of the depression diagnosis | Yes                           | None stated                       | A minimum of three years of history before the index date.                              | Excluded patients with more than two prescriptions for antidepressants at any time prior to the index date.<br>Adjusted for history of affective disorders in the models. | Provides data for depression severity: general depression; mild depression; moderate depression; severe depression; other. |

1

2

| 3 Author,<br>4 year of<br>5 publication | 6 Title                                                  | 7 Study title                                                                                                                                                | Type of study             | Database(s) | Study period (years) | Outcome description                                                                                                                                                                                                                                                                                                                                                                                                                                          | List of codes available | Validation of list of codes | EHR-related eligibility criteria for the study // Follow up requirements                                                                             | Handling of outcomes occurring prior to exposure         | Notes                                                                           |
|-----------------------------------------|----------------------------------------------------------|--------------------------------------------------------------------------------------------------------------------------------------------------------------|---------------------------|-------------|----------------------|--------------------------------------------------------------------------------------------------------------------------------------------------------------------------------------------------------------------------------------------------------------------------------------------------------------------------------------------------------------------------------------------------------------------------------------------------------------|-------------------------|-----------------------------|------------------------------------------------------------------------------------------------------------------------------------------------------|----------------------------------------------------------|---------------------------------------------------------------------------------|
| 8 Bouras,<br>9 2016 [1]                 | 10<br>11<br>12<br>13<br>14<br>15<br>16<br>17             | Linked Hospital and Primary Care Database Analysis of the Incidence and Impact of Psychiatric Morbidity Following Gastrointestinal Cancer Surgery in England | Cohort study              | CPRD<br>HES | 1997-2012            | "Codes for the diagnoses of (...) depression were measured in CPRD (...) In HES, ICD-10 codes recorded in the first position of a hospital episode (signifying the main condition treated) for the diagnoses of depression. (...) Prescription data (...) including antidepressants (Fluoxetine, Paroxetine, Sertraline, Citalopram, Escitalopram, Mirtazapine, and Venlafaxine), (...) anxiolytics (Diazepam and Lorazepam)."                               | Yes                     | None stated                 | Data available for >3 years before the study index date<br><br>//<br><br>Follow up duration: 1 year post diagnosis                                   | Not applicable                                           | -                                                                               |
| 18 Claxton,<br>19 2000 [16]             | 20<br>21<br>22<br>23<br>24<br>25<br>26<br>27<br>28<br>29 | Selective serotonin reuptake inhibitor treatment in the UK: Risk of relapse or recurrence of depression                                                      | Cohort study              | MediPlus    | 1993-1995            | Re-initiation of any antidepressant after a gap of at least 6 months with no antidepressant prescription; suicide attempt, referral to psychotherapy or psychiatrist, admission to a mental health facility, emergency room use related to mental disorders, or electroconvulsive therapy and re-initiation of antidepressant one of the above.<br><br>Depression first defined as treatment with a SSRI and a Read code within 1 month of the prescription. | Yes                     | None stated                 | Only patients with contact with the services during the previous 2 years of the index date;<br>//<br>Follow up duration of 18 months post index date | Not applicable (all patients had been treated with SSRI) | Patients dementia, schizophrenia, psychosis and manic depression were excluded. |
| 30 Clifton,<br>31 2002 [17]             | 32<br>33<br>34<br>35                                     | Drug or symptom-induced depression in men treated with alpha1-blockers for benign prostatic hyperplasia? A nested-case control study                         | Nested case-control study | CPRD        | 1992-1999            | Proxy of antidepressant prescription (first prescription of antidepressant)                                                                                                                                                                                                                                                                                                                                                                                  | No                      | None stated                 | Registered in CPRD for at least 12 months<br>//<br>ND                                                                                                | None stated                                              | -                                                                               |

36

37

38

39

40

41

42

43

44

45

46

1  
2  
3  
4  
5  
6  
7  
8  
9  
10  
11  
12  
13  
14  
15  
16  
17  
18  
19  
20  
21  
22  
23  
24  
25  
26  
27  
28  
29  
30  
31  
32  
33  
34  
35  
36  
37  
38  
39  
40  
41  
42  
43  
44  
45  
46

For peer review only

| Author, year of publication | Study title                                                                                              | Type of study | Database(s) | Study period (years) | Outcome description                                                                                                                                                                                                                                                                                                                                                                                                                                                                                                                                                                                                                                                                                                        | List of codes available        | Validation of list of codes | EHR-related eligibility criteria for the study // Follow up requirements | Handling of outcomes occurring prior to exposure                                | Notes                                                                               |
|-----------------------------|----------------------------------------------------------------------------------------------------------|---------------|-------------|----------------------|----------------------------------------------------------------------------------------------------------------------------------------------------------------------------------------------------------------------------------------------------------------------------------------------------------------------------------------------------------------------------------------------------------------------------------------------------------------------------------------------------------------------------------------------------------------------------------------------------------------------------------------------------------------------------------------------------------------------------|--------------------------------|-----------------------------|--------------------------------------------------------------------------|---------------------------------------------------------------------------------|-------------------------------------------------------------------------------------|
| Dave, 2010 [18]             | Incidence of Maternal and Paternal Depression in Primary Care                                            | Cohort study  | THIN        | 1993-2007            | “Read code entry for unipolar depression and/or a prescription for an antidepressant at the appropriate therapeutic dose for treatment of depression on a given consultation date (...) we eliminated those who had an entry for anxiety or panic disorder but had no entry for depression in their entire computerized medical record.”                                                                                                                                                                                                                                                                                                                                                                                   | No<br><br>Available on request | None stated                 | None stated                                                              | Results stratified by history of previous mental disorder                       | Mixed anxiety and depression was included.                                          |
| Fardet, 2012 [2]            | Suicidal behavior and severe neuropsychiatric disorders following glucocorticoid therapy in primary care | Cohort study  | THIN        | 1990-2008            | New episode was considered when no diagnosis or prescription had been registered in the past year.<br>'Read code for unipolar depression, for symptoms of depression, or for a prescription for an antidepressant. Diagnoses were considered first; prescriptions of antidepressants were used in defining the outcome only when there was no recorded diagnosis of a neuropsychiatric illness and no other recorded indication for the prescription. To exclude patients who may have received prescriptions for antidepressants for anxiety rather than for depression, we eliminated those who had an entry for anxiety or panic disorder but had no entry for depression in their entire computerized medical record.' | No                             | None stated                 | ≥6 months of registration with the primary care practice.                | Hazards ratios adjusted for past history of neuropsychiatric disorders (yes/no) | Outcome was eligible if there was no record of the outcome in the previous 6 months |

1

2

| 3 Author,<br>4 year of<br>5 publication | 6 Title                                                                                                                                                                                                                                                                                                                                | 7 Study title             | Type of study | Database(s) | Study period (years)                                                                                                        | Outcome description | List of codes available | Validation of list of codes                                                                     | EHR-related eligibility criteria for the study // Follow up requirements                                                                                                          | Handling of outcomes occurring prior to exposure | Notes |
|-----------------------------------------|----------------------------------------------------------------------------------------------------------------------------------------------------------------------------------------------------------------------------------------------------------------------------------------------------------------------------------------|---------------------------|---------------|-------------|-----------------------------------------------------------------------------------------------------------------------------|---------------------|-------------------------|-------------------------------------------------------------------------------------------------|-----------------------------------------------------------------------------------------------------------------------------------------------------------------------------------|--------------------------------------------------|-------|
| 8 Gunnell,<br>9 2009 [19]               | 10 Varenicline and suicidal<br>11 behaviour: a cohort<br>12 study based on data<br>13 from the General<br>14 Practice Research<br>15 Database                                                                                                                                                                                          | Cohort study              | CPRD          | 2006-2008   | Depression defined as the start of antidepressant therapy                                                                   | No                  | None stated             | At least 1 years of CPRD record before index date // ND                                         | People who had been prescribed an antidepressant within the previous 6 months before index date were excluded. Previous psychiatric consultations considered in the models.       | -                                                |       |
| 18 Granerod,<br>19 2016 [3]             | 20 Increased rates of<br>21 sequelae post-<br>22 encephalitis in<br>23 individuals attending<br>24 primary care practices in<br>25 the United Kingdom: a<br>26 population-based<br>27 retrospective cohort<br>28 study                                                                                                                 | Matched cohort study      | CPRD          | 1998-2012   | Depression, consisting of codes for depression diagnosis and symptoms if evidence of pharmacological treatment was present. | Yes                 | None stated             | None stated // At least one contact with the GP practice in the two years after the index date. | Analysis restricted to those at risk of a new-onset outcome, defined as no code in the year prior to the index date.                                                              | -                                                |       |
| 26 Hagberg,<br>27 2017 [20]             | 28 Risk of Incident<br>29 Antidepressant-Treated<br>30 Depression Associated<br>31 with Use of 5alpha-<br>32 Reductase Inhibitors<br>33 Compared with Use of<br>34 alpha-Blockers in Men<br>35 with Benign Prostatic<br>36 Hyperplasia: A<br>37 Population-Based Study<br>38 Using the Clinical<br>39 Practice Research<br>40 Datalink | Nested case-control study | CPRD          | 1992-2013   | A Read code for a depression diagnosis and a prescription for an antidepressant within 90 days of the depression diagnosis. | No                  | None stated             | At least 1 year of recorded history in the database before cohort entry;                        | Excluded men with a diagnosis of depression or suicidal behaviors (ideation or attempts), or men who received prescriptions for antidepressant medications prior to cohort entry. | -                                                |       |

37

38

39

40

41

42

43

44

45

46

1  
2

| 3Author,<br>4year of<br>5publication | 6Title | 7Study title                                                                                                                                                   | Type of study                | Database(s) | Study period (years) | Outcome description                                                                                                                                                                                                                                                                                                                                                             | List of codes available | Validation of list of codes | EHR-related eligibility criteria for the study // Follow up requirements                                                                                                                                          | Handling of outcomes occurring prior to exposure                                                                                                                                         | Notes                                                                             |
|--------------------------------------|--------|----------------------------------------------------------------------------------------------------------------------------------------------------------------|------------------------------|-------------|----------------------|---------------------------------------------------------------------------------------------------------------------------------------------------------------------------------------------------------------------------------------------------------------------------------------------------------------------------------------------------------------------------------|-------------------------|-----------------------------|-------------------------------------------------------------------------------------------------------------------------------------------------------------------------------------------------------------------|------------------------------------------------------------------------------------------------------------------------------------------------------------------------------------------|-----------------------------------------------------------------------------------|
| 8Hagberg, 2016 [21]                  | 9      | 10 Incidence rates of suicidal behaviors and treated depression in patients with and without psoriatic arthritis using the Clinical Practice Research Datalink | 11 Nested case control study | 12 CPRD     | 13 1998-2012         | 14 'A patient was required to have at least one prescription for an antidepressant drug in addition to a diagnosis code for depression within 60 days of each other to qualify as a case of treated depression.'                                                                                                                                                                | 15 No                   | 16 Yes, record review       | 17 At least one year of registration with the practice prior to the index date                                                                                                                                    | 18 Any patient who had a diagnosis of depression or a prescription for an antidepressant drug recorded before the cohort entry date was excluded from the Treated Depression sub-cohort. | 19 -                                                                              |
| 20 Harris, 2011 [22]                 | 21     | 22 Depression indicators in a national sample of older community and care home patients: applying the Quality and Outcomes Framework                           | 23 Cohort study              | 24 THIN     | 25 ND-2008           | 26 (i) depression case finding with assessment tool validated for primary care; (ii) assessment of depression severity in patients with a new depression episode.<br><br>27 'Quality and Outcomes Framework Read Codes were used in both cases, but no account was taken of exceptions recorded by GPs, as these may bias comparisons between community and care home samples.' | 28 Yes                  | 29 None stated              | 30 Patients registered for at least 90 days with a new diagnosis of depression in period 91-450 days from end of follow up and no depression severity assessment >365 days before end of follow up.               | 31 Not applicable                                                                                                                                                                        | 32 Only practices contributing with data up to at least March 2008 were included. |
| 33 Heschdorffer, 2012 [4]            | 34     | 35 Epilepsy, suicidality, and psychiatric disorders: a bidirectional association                                                                               | 36 Matched cohort study      | 37 CPRD     | 38 1990-2008         | 39 Incident major depression, not further specified                                                                                                                                                                                                                                                                                                                             | 40 No                   | 41 None stated              | 42 At least 3 years of data before the index date, 1 year after the index date, and at least 1 code for a medical or drug code in the 6 months before the index<br>43 //<br>44 Follow up 3 years after index date | 45 Excluded subjects with a record of the outcome before the study date.                                                                                                                 | 46 -                                                                              |



1  
2

| 3<br>4<br>5<br>6<br>7                                                      | Author,<br>year of<br>publication | Study title                                                                                                                             | Type of study           | Database(s)                                         | Study<br>period<br>(years) | Outcome description                                                                                                                                                                                                                                                                                                                                                                                                                                                                          | List of<br>codes<br>available | Validation<br>of list of<br>codes | EHR-related<br>eligibility<br>criteria<br>for the study<br>//<br>Follow up<br>requirements | Handling of<br>outcomes<br>occurring prior<br>to exposure                                                               | Notes |
|----------------------------------------------------------------------------|-----------------------------------|-----------------------------------------------------------------------------------------------------------------------------------------|-------------------------|-----------------------------------------------------|----------------------------|----------------------------------------------------------------------------------------------------------------------------------------------------------------------------------------------------------------------------------------------------------------------------------------------------------------------------------------------------------------------------------------------------------------------------------------------------------------------------------------------|-------------------------------|-----------------------------------|--------------------------------------------------------------------------------------------|-------------------------------------------------------------------------------------------------------------------------|-------|
| 8<br>9<br>10<br>11<br>12<br>13<br>14<br>15<br>16                           | Jacob, 2017<br>[23]               | Depression Risk in<br>Patients with<br>Rheumatoid Arthritis in<br>the United Kingdom                                                    | Cohort study            | Disease<br>Analyser<br>database                     | 2000-2014                  | Diagnoses of depression, according<br>to the ICD-10 codes                                                                                                                                                                                                                                                                                                                                                                                                                                    | No                            | None<br>stated                    | None stated<br>//<br>Incidence in the<br>first 5 years of the<br>index date                | None stated                                                                                                             | -     |
| 17<br>18<br>19<br>20<br>21<br>22<br>23<br>24<br>25<br>26<br>27<br>28<br>29 | Jenkins-<br>Jones, 2018<br>[24]   | Poor compliance and<br>increased mortality,<br>depression and<br>healthcare costs in<br>patients with congenital<br>adrenal hyperplasia | Matched cohort<br>study | CPRD,<br>ONS,<br>HES<br>inpatient and<br>outpatient | ?                          | Depression defined by Read Codes<br>in CPRD, by ICD-10 code in HES<br>inpatient data, or by the prescription<br>of antidepressants.<br><br>Depression was identified not only<br>from ongoing records but also from<br>patients' clinical histories dating from<br>before the start of data follow-up.<br><br>A sensitivity analysis considered<br>only those depression outcomes<br>identified by both diagnostic (Read<br>or ICD-10) code and at least one<br>antidepressant prescription. | Yes                           | None<br>stated                    | None stated                                                                                | Not applicable:<br>the outcome<br>was lifetime<br>prevalence of<br>depression<br>rather than<br>incident<br>occurrence. | -     |

30  
31  
32  
33  
34  
35  
36  
37  
38  
39  
40  
41  
42  
43  
44  
45  
46

1  
2  
3  
4  
5  
6  
7  
8  
9  
10  
11  
12  
13  
14  
15  
16  
17  
18  
19  
20  
21  
22  
23  
24  
25  
26  
27  
28  
29  
30  
31  
32  
33  
34  
35  
36  
37  
38  
39  
40  
41  
42  
43  
44  
45  
46

| Author, year of publication | Study title                                                                                              | Type of study | Database(s) | Study period (years) | Outcome description                                                                                                                                                                                                                                                                                                                                                                                                                                                                                                                                                                                                                                                                                                                                                         | List of codes available | Validation of list of codes | EHR-related eligibility criteria for the study // Follow up requirements | Handling of outcomes occurring prior to exposure | Notes                                          |
|-----------------------------|----------------------------------------------------------------------------------------------------------|---------------|-------------|----------------------|-----------------------------------------------------------------------------------------------------------------------------------------------------------------------------------------------------------------------------------------------------------------------------------------------------------------------------------------------------------------------------------------------------------------------------------------------------------------------------------------------------------------------------------------------------------------------------------------------------------------------------------------------------------------------------------------------------------------------------------------------------------------------------|-------------------------|-----------------------------|--------------------------------------------------------------------------|--------------------------------------------------|------------------------------------------------|
| John, 2016 [25]             | Recent trends in primary-care antidepressant prescribing to children and young people: an e-cohort study | Cohort study  | SAIL        | 2003-2013            | <p><u>Incident episode</u>: a Read code for a diagnosis or symptom of depression, or antidepressant, with no record of the given subtype (antidepressant prescription or depression diagnosis or depression symptom) in the previous 12 months; Participants could have more than one episode recorded across the study period as long a period of at least 12 months existed between entries within that subtype.</p> <p><u>Prevalent episode</u>: any record of the given subtype (antidepressant prescription or depression diagnosis or depression symptom) in a target year</p> <p><u>Annual recurrent episode</u>: defined as the first record in a given year of a given subtype where a record of that subtype exists previously in that individuals GP record.</p> | Yes                     | None stated                 | Registered with the GP practice for at least 1 year                      | Not applicable                                   | Explored the indication of the antidepressants |

For peer review only

1

2

| 3<br>4<br>5<br>6<br>7                                                                      | Author,<br>year of<br>publication | Study title                                                                                                                                                                         | Type of study        | Database(s) | Study<br>period<br>(years) | Outcome description                                                                                                                                                                                                                                                                                                                                                                                                                                                                                                                                                                                                                | List of<br>codes<br>available    | Validation<br>of list of<br>codes | EHR-related<br>eligibility criteria<br>for the study<br>//<br>Follow up<br>requirements | Handling of<br>outcomes<br>occurring prior<br>to exposure                               | Notes                                                                                                                                                                                                              |
|--------------------------------------------------------------------------------------------|-----------------------------------|-------------------------------------------------------------------------------------------------------------------------------------------------------------------------------------|----------------------|-------------|----------------------------|------------------------------------------------------------------------------------------------------------------------------------------------------------------------------------------------------------------------------------------------------------------------------------------------------------------------------------------------------------------------------------------------------------------------------------------------------------------------------------------------------------------------------------------------------------------------------------------------------------------------------------|----------------------------------|-----------------------------------|-----------------------------------------------------------------------------------------|-----------------------------------------------------------------------------------------|--------------------------------------------------------------------------------------------------------------------------------------------------------------------------------------------------------------------|
| 8<br>9<br>10<br>11<br>12<br>13<br>14<br>15<br>16<br>17<br>18<br>19<br>20<br>21<br>22<br>23 | Kendrick,<br>2015 [26]            | Changes in rates of recorded depression in English primary care 2003-2013: time trend analyses of effects of the economic recession, and the GP contract quality outcomes framework | Cohort study         | CPRD        | 2003-2013                  | “had clinical or referral events recorded which included a Read code for non-psychotic depressive symptoms or diagnoses, or for assessment using depression symptom questionnaires.”<br><br>Prevalence of depression: Read code present in the year or quarter;<br><br>Incidence of depression: limited to patients who had no code for depression recorded in the previous 12 months.<br><br>Incidence of first-ever depression: no previous code for depression diagnosis, symptoms or antidepressant treatment recorded within 10 year study period, and no previous record of depression or antidepressant treatment recorded. | Yes                              | None stated                       | None stated                                                                             | Not applicable                                                                          | “We excluded patients with psychotic diagnoses including bipolar disorder, psychotic depression, and schizoaffective psychosis, and patients prescribed antidepressants for other indications besides depression.” |
| 24<br>25<br>26<br>27<br>28<br>29                                                           | Khan, 2010<br>[15]                | Consulting and prescribing behaviour for anxiety and depression in long-term survivors of cancer in the UK                                                                          | Matched cohort study | CPRD        | 2003-2006                  | Consultations for depression and prescriptions of as tricyclics, SSRIs and MAOIs                                                                                                                                                                                                                                                                                                                                                                                                                                                                                                                                                   | No<br><br>(Available on request) | None stated                       | None stated<br><br>//<br><br>Follow up duration: 3 years                                | History of anxiety prior to the analysis period was included in the models              | -                                                                                                                                                                                                                  |
| 30<br>31<br>32<br>33<br>34                                                                 | Rotz, 2017<br>[27]                | Cardiovascular and neuropsychiatric risks of varenicline and bupropion in smokers with chronic obstructive pulmonary disease                                                        | Matched cohort study | QResearch   | 2001-2012                  | Depression, not further specified                                                                                                                                                                                                                                                                                                                                                                                                                                                                                                                                                                                                  | No                               | None stated                       | Registered for >12 months before data extraction<br>//<br>Follow up duration 6 months   | History of neuropsychiatric events before the index date were considered as confounders | -                                                                                                                                                                                                                  |
| 35<br>36<br>37<br>38<br>39                                                                 | Rotz, 2015<br>[28]                | Cardiovascular and neuropsychiatric risks of varenicline: a retrospective cohort study                                                                                              | Matched cohort study | QResearch   | 2007-2012                  | Depression, not further specified                                                                                                                                                                                                                                                                                                                                                                                                                                                                                                                                                                                                  | No                               | None stated                       | Registered for >12 months before data extraction<br>//<br>Follow up duration 6 months   | History of neuropsychiatric events before the index date were considered as confounders | -                                                                                                                                                                                                                  |

40

41

42

43

44

45

46

1  
2  
3  
4  
5  
6  
7  
8  
9  
10  
11  
12  
13  
14  
15  
16  
17  
18  
19  
20  
21  
22  
23  
24  
25  
26  
27  
28  
29  
30  
31  
32  
33  
34  
35  
36  
37  
38  
39  
40  
41  
42  
43  
44  
45  
46

| Author, year of publication | Study title                                                                                                                                   | Type of study                            | Database(s) | Study period (years) | Outcome description                                                                                                                                              | List of codes available                                     | Validation of list of codes  | EHR-related eligibility criteria for the study // Follow up requirements                                                                                                                    | Handling of outcomes occurring prior to exposure                                                                                                         | Notes                                                                                                                                                                             |
|-----------------------------|-----------------------------------------------------------------------------------------------------------------------------------------------|------------------------------------------|-------------|----------------------|------------------------------------------------------------------------------------------------------------------------------------------------------------------|-------------------------------------------------------------|------------------------------|---------------------------------------------------------------------------------------------------------------------------------------------------------------------------------------------|----------------------------------------------------------------------------------------------------------------------------------------------------------|-----------------------------------------------------------------------------------------------------------------------------------------------------------------------------------|
| Kurd, 2005 [6]              | The risk of depression, anxiety, and suicidality in patients with psoriasis: A population-based cohort study                                  | Matched cohort study                     | CPRD        | 1987-2002            | Depression included all clinician diagnoses of depressive symptomology including bipolar disorder, defined by diagnostic Read or OXMIS codes                     | No<br><br>(refers using the same codes of previous studies) | None stated                  | None stated                                                                                                                                                                                 | Patients with history of anxiety in the 6 months before the index date were excluded in a sensitivity analysis.                                          | -                                                                                                                                                                                 |
| Lurie, 2015 [7]             | Antibiotic exposure and the risk for depression, anxiety, or psychosis: A nested case-control study                                           | Nested case control study                | THIN        | 1995-2013            | At least one Read code of depression; not further specified.                                                                                                     | Yes                                                         | None stated                  | Only records from patients that had been registered with the GP for more than 183 days<br>//<br>Outcomes were considered incidence if occurring at more than 183 days after the index date. | Patients who had pharmacological treatment for a specific psychiatric diagnosis more than 90 days before the diagnosis was first recorded were excluded. | Patients with mixed anxiety and depression were excluded from the analysis                                                                                                        |
| Martin-Merino, 2010 [29]    | Study of a cohort of patients newly diagnosed with depression in general practice: Prevalence, incidence, comorbidity, and treatment patterns | Cohort study, descriptive and analytical | THIN        | 2002-2004            | Patients with incident depression during the follow up but excluding those who had 5 or more prescriptions of an antidepressant before the depression diagnosis. | No                                                          | Yes<br><br>GP questionnaires | Registered for >2 years with their GP practice prior to the index date; Excluded patients aged >69 years who had fewer than 2 visits during the follow-up.                                  | All subjects who had a record of depression before the index date were excluded.                                                                         | Prevalence of depression calculated as the sum of all patients who had the outcome during the study, plus those who had the outcome in the two years before the study start date. |

1  
2  
3  
4  
5  
6  
7  
8  
9  
10  
11  
12  
13  
14  
15  
16  
17  
18  
19  
20  
21  
22  
23  
24  
25  
26  
27  
28  
29  
30  
31  
32  
33  
34  
35  
36  
37  
38  
39  
40  
41  
42  
43  
44  
45  
46

| Author, year of publication | Study title                                                                                                                                            | Type of study            | Database(s)                       | Study period (years) | Outcome description                                                                                                                                                                                                                                  | List of codes available                                      | Validation of list of codes                                                | EHR-related eligibility criteria for the study // Follow up requirements                                                                                                                      | Handling of outcomes occurring prior to exposure                                                                       | Notes                                                                                                                                   |
|-----------------------------|--------------------------------------------------------------------------------------------------------------------------------------------------------|--------------------------|-----------------------------------|----------------------|------------------------------------------------------------------------------------------------------------------------------------------------------------------------------------------------------------------------------------------------------|--------------------------------------------------------------|----------------------------------------------------------------------------|-----------------------------------------------------------------------------------------------------------------------------------------------------------------------------------------------|------------------------------------------------------------------------------------------------------------------------|-----------------------------------------------------------------------------------------------------------------------------------------|
| Meier, 2004 [9]             | The Risk of Severe Depression, Psychosis or Panic Attacks with Prophylactic Antimalarials                                                              | Cohort study             | CPRD                              | 1990-1999            | Depression referred to specialist or hospital, or if received treatment with antidepressants at or after the diagnosis date identified by OXMIS-and/or- ICD-8-codes                                                                                  | No                                                           | Yes<br><br>'reviewed a list of all cases to determine inclusion/exclusion' | ≥1 year of data available before index date and "some GPRD activity (diagnoses or prescriptions) recorded after the index date"<br>//<br>Patients were censored 18 months after exposure date | "The base population for person-time analyses consisted of all subjects free of depression at the start of follow up." | -                                                                                                                                       |
| Millson, 2000 [30]          | Are triptans with enhanced lipophilicity used for the acute treatment of migraine associated with an increased consulting rate for depressive illness? | Cohort study, analytical | CPRD, data for the West Midlands  | 1993-1997            | 'consulting at least once for depression'                                                                                                                                                                                                            | Yes                                                          | No                                                                         | None stated                                                                                                                                                                                   | None Stated                                                                                                            | -                                                                                                                                       |
| Milojevic, 2017 [31]        | Mental health impacts of flooding: a controlled interrupted time series analysis of prescribing data in England                                        | Cohort study             | General practice prescribing data | 2010-2015            | Antidepressants prescription                                                                                                                                                                                                                         | No<br><br>(but list of antidepressants provided in appendix) | Not applicable                                                             | None stated                                                                                                                                                                                   | Not applicable                                                                                                         | -                                                                                                                                       |
| Moore, 2009 [32]            | Explaining the rise in antidepressant prescribing: a descriptive study using the general practice research database                                    | Cohort study             | CPRD                              | 1993-2005            | Depression: "first ever antidepressant prescription for depression diagnosed up to 180 days before or 90 days after the prescribing event, or received a first ever diagnosis of depression without an associated prescription for antidepressants." | No                                                           | None stated                                                                | Registered with practices contributing with up to standard quality data for the entire study period                                                                                           | Patients only included if it was the first ever events during the follow up period.                                    | Provides data for treatment patterns: chronic treatment; intermittent treatment; short-term treatment; delayed treatment; no treatment. |

1  
2

| 3<br>4<br>5<br>6<br>7                                                | Author,<br>year of<br>publication | Study title                                                                                                                                                                                             | Type of study                          | Database(s) | Study<br>period<br>(years) | Outcome description                                                                                                                                                                                                                                                                                                                                                                                                                                                    | List of<br>codes<br>available                | Validation<br>of list of<br>codes | EHR-related<br>eligibility criteria<br>for the study<br>//<br>Follow up<br>requirements                                 | Handling of<br>outcomes<br>occurring prior<br>to exposure                                                                                                                       | Notes                                                                             |
|----------------------------------------------------------------------|-----------------------------------|---------------------------------------------------------------------------------------------------------------------------------------------------------------------------------------------------------|----------------------------------------|-------------|----------------------------|------------------------------------------------------------------------------------------------------------------------------------------------------------------------------------------------------------------------------------------------------------------------------------------------------------------------------------------------------------------------------------------------------------------------------------------------------------------------|----------------------------------------------|-----------------------------------|-------------------------------------------------------------------------------------------------------------------------|---------------------------------------------------------------------------------------------------------------------------------------------------------------------------------|-----------------------------------------------------------------------------------|
| 8<br>9<br>10<br>11<br>12<br>13<br>14<br>15                           | Morgan,<br>2014 [33]              | General practice-<br>recorded depression<br>and antidepressant use<br>in young people with<br>newly diagnosed Type 1<br>diabetes: a cohort study<br>using the Clinical<br>Practice Research<br>Datalink | Matched cohort<br>study                | CPRD        | 1988-2010                  | Depression identified from diagnosis<br>codes (Oxford Medical Information<br>System and Read), along with at<br>least one antidepressant prescription<br>(monoamine oxidase inhibitors,<br>selective serotonin reuptake<br>inhibitors, tricyclic antidepressants or<br>other antidepressants).                                                                                                                                                                         | No                                           | None<br>stated                    | None stated                                                                                                             | Participants with<br>depression<br>diagnoses or<br>prescriptions<br>prior to diabetes<br>diagnosis (or<br>prior to the start<br>date for control<br>subjects) were<br>excluded. | -                                                                                 |
| 16<br>17<br>18<br>19<br>20<br>21                                     | Petersen,<br>2006 [34]            | Risk and predictors of<br>fatigue after infectious<br>mononucleosis in a<br>large primary-care<br>cohort                                                                                                | Nested case<br>control cohort<br>study | CPRD        | 1989-2000                  | Depression, not further specified                                                                                                                                                                                                                                                                                                                                                                                                                                      | No<br><br>(available<br>from the<br>authors) | None<br>stated                    | At least one year<br>of data before<br>diagnosis<br>//<br>At least one year<br>of complete follow<br>up after diagnosis | Included<br>patients who did<br>not have fatigue<br>in the year<br>before onset                                                                                                 | -                                                                                 |
| 22<br>23<br>24<br>25<br>26<br>27<br>28<br>29<br>30<br>31<br>32<br>33 | Rait, 2009<br>[35]                | Recent trends in the<br>incidence of recorded<br>depression in primary<br>care                                                                                                                          | Cohort study                           | THIN        | 1996-2006                  | “Diagnoses of<br>depression (e.g. ‘depressive<br>disorder’) and recorded depressive<br>symptoms (e.g. ‘low mood’). new<br>episode of diagnosed<br>depression was defined as an entry<br>in the records where there<br>was no previous diagnosis of<br>depression coded in the previous<br>year. A new episode of depressive<br>symptoms was also defined as<br>an entry where there had been no<br>previous recorded depressive<br>symptom code in the previous year.” | No                                           | None<br>stated                    | At least one year<br>of follow up data<br>//<br>ND                                                                      | None stated                                                                                                                                                                     | Provides results<br>separately for<br>diagnoses and<br>symptoms of<br>depression. |
| 34<br>35<br>36                                                       | Shah, 2016<br>[36]                | The mental health and<br>mortality impact of death<br>of a partner with<br>dementia                                                                                                                     | Nested case<br>control study           | THIN        | 2005-2008                  | Depression, not further specified                                                                                                                                                                                                                                                                                                                                                                                                                                      | Yes                                          | None<br>stated                    | At least one year<br>of data with the<br>practice                                                                       | None stated                                                                                                                                                                     | -                                                                                 |

43  
44  
45  
46

1  
2

| 3<br>4<br>5<br>6<br>7                        | Author,<br>year of<br>publication | Study title                                                                                                                                                         | Type of study                | Database(s) | Study<br>period<br>(years) | Outcome description                                                                                                                                                                                                                | List of<br>codes<br>available | Validation<br>of list of<br>codes | EHR-related<br>eligibility<br>criteria<br>for the study<br>//<br>Follow up<br>requirements                                                        | Handling of<br>outcomes<br>occurring prior<br>to exposure                                                                                   | Notes                                                                                                              |
|----------------------------------------------|-----------------------------------|---------------------------------------------------------------------------------------------------------------------------------------------------------------------|------------------------------|-------------|----------------------------|------------------------------------------------------------------------------------------------------------------------------------------------------------------------------------------------------------------------------------|-------------------------------|-----------------------------------|---------------------------------------------------------------------------------------------------------------------------------------------------|---------------------------------------------------------------------------------------------------------------------------------------------|--------------------------------------------------------------------------------------------------------------------|
| 8<br>9<br>10<br>11<br>12<br>13<br>14         | Schneider,<br>2013 [10]           | Antimalarial<br>chemoprophylaxis and<br>the risk of<br>neuropsychiatric<br>disorders                                                                                | Nested case<br>control study | CPRD        | 2001-2009                  | Incident diagnosis of depression, not<br>further specified                                                                                                                                                                         | Yes                           | None<br>stated                    | At least 1 year of<br>date before the<br>index date<br>//<br>some activity<br>(diagnoses or<br>prescriptions)<br>recorded after the<br>index date | Excluded<br>patients with the<br>outcome of<br>interest<br>observed before<br>the index date                                                | Excluded<br>patients with<br>history of<br>cancer,<br>alcoholism, and<br>rheumatoid<br>arthritis.                  |
| 15<br>16<br>17<br>18<br>19<br>20<br>21       | Schneider,<br>2010 [37]           | COPD and the risk of<br>depression                                                                                                                                  | Cohort study                 | CPRD        | 1995-2005                  | Diagnosis of depression, not further<br>specified<br><br>In sensitivity analysis, only cases<br>with an incident diagnosis of<br>depression who receive<br>pharmacological treatment within 6<br>months of diagnosis were included | Yes                           | None<br>stated                    | Excluded patients<br>with less than 3<br>years of active<br>recording history<br>prior to the date of<br>the COPD<br>diagnosis                    | Patients with<br>previous history<br>of depression,<br>suicide, suicidal<br>ideation, etc.,<br>prior to the index<br>date were<br>excluded  | Excluded<br>patients with<br>history of<br>cancer, HIV,<br>drug abuse, or<br>alcoholism prior<br>to the index date |
| 22<br>23<br>24<br>25<br>26<br>27             | Sheehan,<br>2015 [11]             | Mental illness,<br>challenging behaviour,<br>and psychotropic drug<br>prescribing in people<br>with intellectual<br>disability: UK population<br>based cohort study | Cohort study,<br>analytical  | THIN        | 1999-2013                  | Read codes for depression<br>(including mixed depression-anxiety)<br>that the authors' used in previous<br>studies.                                                                                                                | Yes                           | None<br>stated                    | Entry in the cohort<br>at least one year<br>after registration<br>with the practice                                                               | None stated                                                                                                                                 | Excludes cases<br>of mixed anxiety<br>and depression                                                               |
| 28<br>29<br>30<br>31<br>32<br>33<br>34<br>35 | Smeeth,<br>2008 [38]              | Effect of statins on a<br>wide range of health<br>outcomes: A cohort<br>study validated by<br>comparison with<br>randomized trials                                  | Cohort study                 | THIN        | 1995-2006                  | Depression defined as the start of<br>antidepressant pharmacotherapy                                                                                                                                                               | No                            | None<br>stated                    | None stated                                                                                                                                       | People with a<br>previous history<br>of the outcome<br>prior to the index<br>date were<br>excluded from<br>the analysis of<br>that outcome. | First year of<br>follow up was<br>excluded.                                                                        |

36  
37  
38  
39  
40  
41  
42  
43  
44  
45  
46

1  
2

| 3<br>4<br>5<br>6<br>7                        | Author,<br>year of<br>publication | Study title                                                                                                                                     | Type of study             | Database(s)        | Study<br>period<br>(years) | Outcome description                                                                                                                                                                                                                                                                                              | List of<br>codes<br>available | Validation<br>of list of<br>codes | EHR-related<br>eligibility criteria<br>for the study<br>//<br>Follow up<br>requirements    | Handling of<br>outcomes<br>occurring prior<br>to exposure                                             | Notes |
|----------------------------------------------|-----------------------------------|-------------------------------------------------------------------------------------------------------------------------------------------------|---------------------------|--------------------|----------------------------|------------------------------------------------------------------------------------------------------------------------------------------------------------------------------------------------------------------------------------------------------------------------------------------------------------------|-------------------------------|-----------------------------------|--------------------------------------------------------------------------------------------|-------------------------------------------------------------------------------------------------------|-------|
| 8<br>9<br>10<br>11<br>12<br>13<br>14<br>15   | Smith, 2014<br>[39]               | Depression and multimorbidity: a cross-sectional study of 1,751,841 patients in primary care                                                    | Cross-sectional           | PCCIU              | ND-2007                    | “Read code for depression recorded within last year and/or 4 or more antidepressant prescriptions (excluding low-dose tricyclic antidepressants) within the last year. Low-dose tricyclic antidepressants were excluded because they are commonly prescribed for chronic pain syndromes rather than depression.” | No                            | None stated                       | Patients alive and permanently registered with a general practice at the date of the study | None stated                                                                                           | -     |
| 16<br>17<br>18<br>19<br>20<br>21<br>22<br>23 | Thomas,<br>2013 [40]              | Smoking cessation treatment and risk of depression, suicide, and self harm in the Clinical Practice Research Datalink: prospective cohort study | Nested case-control study | CPRD<br>HES<br>ONS | 2006-2011                  | “Incident episodes of depression as measured by the date that antidepressant treatment was initiated (treated depression)”<br><br>//<br><br>For comparison with previous study, depression was also defined with Read codes only in CPRD                                                                         | Yes                           | None stated                       | At least one year of registration with the practice prior to the index date<br>//<br>ND    | Previous psychiatric illness, and use of psychotropic medication considered as potential confounders. | -     |
| 24<br>25<br>26<br>27<br>28                   | Tyrer, 1999<br>[41]               | A study of cardiovascular disease, depression and antidepressants on a computerised general practice database                                   | Cohort study              | UK<br>MediPlus     | 1995-1996                  | ‘new diagnosis of depression and treatment, classified by the first antidepressant prescribed.’                                                                                                                                                                                                                  | No                            | None stated                       | At least 12 months of data before the index date<br>//<br>Follow up duration 12 months     | Patients with depression in the 12 months period before the cardiac event were excluded.              | -     |
| 29<br>30<br>31<br>32<br>33                   | Vallerand,<br>2018 [42]           | Risk of depression among patients with acne in the U.K.: a population-based cohort study                                                        | Cohort study, analytical  | THIN               | 1986-2012                  | Read code for major depressive disorder                                                                                                                                                                                                                                                                          | Yes                           | None stated                       | None stated<br>//<br>Follow up for > 2 years after index date                              | Patients with MDD Read code prior to the start of follow up were excluded                             | -     |

34  
35  
36  
37  
38  
39  
40  
41  
42  
43  
44  
45  
46



1  
2

| 3 Author,<br>4 year of<br>5 publication | 6 Title                                                                                                                                                           | 7 Study title                                    | Type of study | Database(s)     | Study period (years)                                                                                                                                                                                                                                  | Outcome description                                   | List of codes available                                                                                                                         | Validation of list of codes                                                                                      | EHR-related eligibility criteria for the study // Follow up requirements                                                                                            | Handling of outcomes occurring prior to exposure | Notes |
|-----------------------------------------|-------------------------------------------------------------------------------------------------------------------------------------------------------------------|--------------------------------------------------|---------------|-----------------|-------------------------------------------------------------------------------------------------------------------------------------------------------------------------------------------------------------------------------------------------------|-------------------------------------------------------|-------------------------------------------------------------------------------------------------------------------------------------------------|------------------------------------------------------------------------------------------------------------------|---------------------------------------------------------------------------------------------------------------------------------------------------------------------|--------------------------------------------------|-------|
| 8 Walters,<br>9 2011 [43]               | 10 The relationship<br>11 between asthma and<br>12 depression in primary<br>13 care patients: A<br>14 historical cohort and<br>15 nested case control<br>16 study | Cohort study<br>and nested case<br>control study | CPRD          | 1995-2006       | GP recorded diagnosis of<br>depression, as defined by<br>Read/OXMIS codes) during the<br>study period                                                                                                                                                 | No<br><br>(codes<br>available<br>from the<br>authors) | None<br>stated                                                                                                                                  | All patients had at<br>least 24 months of<br>'up to standard'<br>data prior to the<br>index date of the<br>case. | All cases with a<br>recorded<br>medical<br>diagnosis of<br>depression or<br>depressive<br>symptoms<br>before the index<br>date were<br>excluded from<br>the cohort. | -                                                |       |
| 17 Pang, 2003<br>18 [44]                | Lipid-lowering drugs and<br>the risk of depression<br>and suicidal behavior                                                                                       | Matched cohort<br>study                          | CPRD          | 1991<br>onwards | Treated depression (with<br>antidepressants) referred to a<br>consultant or patient hospitalized for<br>depression; excluded patients who<br>also had diagnosis of anxiety or with<br>specific causes for depression (e.g.<br>post-partum depression) | No                                                    | Yes<br><br>List of<br>patients<br>referred to<br>hospital or<br>consultant<br>were<br>manually<br>reviewed;<br>referral<br>letters<br>reviewed. | ≥1 year of data<br>available before<br>index date                                                                | Patients with<br>history of<br>depression prior<br>to study start<br>were excluded                                                                                  | -                                                |       |

26 CPRD – Clinical Practice Research Datalink; EHR – electronic health records; HES – Hospital Episodes Statistics; ICD-10 – International Classification of Diseases, edition 10;  
 27 ND – not defined; PCCIU – Primary Care Clinical Informatics Unit Research; SAIL – SAIL Databank - The Secure Anonymised Information Linkage Databank; THIN – The Health  
 28 Improvement Network; ONS – Office for National Statistics.

29  
30  
31  
32  
33  
34  
35  
36  
37  
38  
39  
40  
41  
42  
43  
44  
45  
46

1  
2  
3 **Appendix table 5. Main characteristics of the eligible studies: composite outcomes, anxiety and depression.**  
4

| 5 Author, year of publication | 6 Study title                                                                                                                             | 7 Type of study                                     | 8 Database(s) | 9 Study period (years) | 10 Outcome description                                                                                                                                                                                                                                                                                                                                                                                                                                                                                                                                                                                                                                                                                                                                                                                                                      | 11 List of codes available | 12 Validation of list of codes         | 13 EHR-related eligibility criteria for the study // Follow up requirements       | 14 Handling of outcomes occurring prior to exposure                                                                                                                                                                                                                                                                                                                                                                                                                                                                                                                                                                                                                                                                                                                                                                                                                                                                                                                                                                                                                                                                                                                                                                                                                                                                                                                                                                                                                                                                                                                                                                                                                                                                                                                                                                                                                                                                                                                                                                                                                                                                                                                                                                                                                                                                                                                                                                                                                                                                                                                                                                                                                                                                                                                                                                                                                                                                                                                                                                                                                                                                                                                                                                                                                                                                                                                                                                                                                                                                                                                                                                                                                                                                                                                                                                                                                                                                                                                                                                                                                                                                                                                                                                                                                                                                                                                                                                                                                                                                                                                                                                                                                                                                                                                                                                                                                                                                                                                                                                                                                                                                                                                                                                                                                                                                                                                                                                                                                                                                                                                                                                                                                                                                                                                                                                                                                                                                                                                                                                                                                                                                                                                                                                                                                                                                                                                                                                                                                                                                                                                                                                                                                                                                                                                                                                                                                                                                                                                                                                    | 15 Notes |
|-------------------------------|-------------------------------------------------------------------------------------------------------------------------------------------|-----------------------------------------------------|---------------|------------------------|---------------------------------------------------------------------------------------------------------------------------------------------------------------------------------------------------------------------------------------------------------------------------------------------------------------------------------------------------------------------------------------------------------------------------------------------------------------------------------------------------------------------------------------------------------------------------------------------------------------------------------------------------------------------------------------------------------------------------------------------------------------------------------------------------------------------------------------------|----------------------------|----------------------------------------|-----------------------------------------------------------------------------------|------------------------------------------------------------------------------------------------------------------------------------------------------------------------------------------------------------------------------------------------------------------------------------------------------------------------------------------------------------------------------------------------------------------------------------------------------------------------------------------------------------------------------------------------------------------------------------------------------------------------------------------------------------------------------------------------------------------------------------------------------------------------------------------------------------------------------------------------------------------------------------------------------------------------------------------------------------------------------------------------------------------------------------------------------------------------------------------------------------------------------------------------------------------------------------------------------------------------------------------------------------------------------------------------------------------------------------------------------------------------------------------------------------------------------------------------------------------------------------------------------------------------------------------------------------------------------------------------------------------------------------------------------------------------------------------------------------------------------------------------------------------------------------------------------------------------------------------------------------------------------------------------------------------------------------------------------------------------------------------------------------------------------------------------------------------------------------------------------------------------------------------------------------------------------------------------------------------------------------------------------------------------------------------------------------------------------------------------------------------------------------------------------------------------------------------------------------------------------------------------------------------------------------------------------------------------------------------------------------------------------------------------------------------------------------------------------------------------------------------------------------------------------------------------------------------------------------------------------------------------------------------------------------------------------------------------------------------------------------------------------------------------------------------------------------------------------------------------------------------------------------------------------------------------------------------------------------------------------------------------------------------------------------------------------------------------------------------------------------------------------------------------------------------------------------------------------------------------------------------------------------------------------------------------------------------------------------------------------------------------------------------------------------------------------------------------------------------------------------------------------------------------------------------------------------------------------------------------------------------------------------------------------------------------------------------------------------------------------------------------------------------------------------------------------------------------------------------------------------------------------------------------------------------------------------------------------------------------------------------------------------------------------------------------------------------------------------------------------------------------------------------------------------------------------------------------------------------------------------------------------------------------------------------------------------------------------------------------------------------------------------------------------------------------------------------------------------------------------------------------------------------------------------------------------------------------------------------------------------------------------------------------------------------------------------------------------------------------------------------------------------------------------------------------------------------------------------------------------------------------------------------------------------------------------------------------------------------------------------------------------------------------------------------------------------------------------------------------------------------------------------------------------------------------------------------------------------------------------------------------------------------------------------------------------------------------------------------------------------------------------------------------------------------------------------------------------------------------------------------------------------------------------------------------------------------------------------------------------------------------------------------------------------------------------------------------------------------------------------------------------------------------------------------------------------------------------------------------------------------------------------------------------------------------------------------------------------------------------------------------------------------------------------------------------------------------------------------------------------------------------------------------------------------------------------------------------------------------------------------------------------------------------------------------------------------------------------------------------------------------------------------------------------------------------------------------------------------------------------------------------------------------------------------------------------------------------------------------------------------------------------------------------------------------------------------------------------------------------------------------------------------------|----------|
| 16 John, 2016 [45]            | 17 Case-finding for common mental disorders of anxiety and depression in primary care: an external validation of routinely collected data | 18 Validation study using patient reported outcomes | 19 SAIL       | 20 2000-2009           | 21 <u>Outcome:</u> Common mental disorders, defined as anxiety and depression.<br>22 Read codes for: i) anxiety diagnosis, e.g. generalised anxiety disorder; ii) anxiety symptoms e.g. anxiousness; iii) mixed anxiety and depression; iv) panic attacks and panic disorders; v) depression diagnoses; vi) depression symptoms.<br>23 Treatment defined as having at least one prescription for an antidepressant, anxiolytic or hypnotic within the year around the date of the survey answer.<br>24 Excluded codes for other psychosis, phobias, obsessive compulsive disorders, post traumatic stress disorder, behavioural disorders, hyperkinetic disorders, conduct disorders, disorders of social functioning, and adjustment disorders.<br>25 Defined 12 algorithms with current and historical symptoms, diagnosis and treatment. | 26 Yes                     | 27 Yes<br>28 Patient reported outcomes | 29 At least 6 months after registration with the practice<br>30<br>31<br>32<br>33 | 34 Not applicable (no exposure under study).<br>35<br>36<br>37<br>38<br>39<br>40<br>41<br>42<br>43<br>44<br>45<br>46<br>47<br>48<br>49<br>50<br>51<br>52<br>53<br>54<br>55<br>56<br>57<br>58<br>59<br>60<br>61<br>62<br>63<br>64<br>65<br>66<br>67<br>68<br>69<br>70<br>71<br>72<br>73<br>74<br>75<br>76<br>77<br>78<br>79<br>80<br>81<br>82<br>83<br>84<br>85<br>86<br>87<br>88<br>89<br>90<br>91<br>92<br>93<br>94<br>95<br>96<br>97<br>98<br>99<br>100<br>101<br>102<br>103<br>104<br>105<br>106<br>107<br>108<br>109<br>110<br>111<br>112<br>113<br>114<br>115<br>116<br>117<br>118<br>119<br>120<br>121<br>122<br>123<br>124<br>125<br>126<br>127<br>128<br>129<br>130<br>131<br>132<br>133<br>134<br>135<br>136<br>137<br>138<br>139<br>140<br>141<br>142<br>143<br>144<br>145<br>146<br>147<br>148<br>149<br>150<br>151<br>152<br>153<br>154<br>155<br>156<br>157<br>158<br>159<br>160<br>161<br>162<br>163<br>164<br>165<br>166<br>167<br>168<br>169<br>170<br>171<br>172<br>173<br>174<br>175<br>176<br>177<br>178<br>179<br>180<br>181<br>182<br>183<br>184<br>185<br>186<br>187<br>188<br>189<br>190<br>191<br>192<br>193<br>194<br>195<br>196<br>197<br>198<br>199<br>200<br>201<br>202<br>203<br>204<br>205<br>206<br>207<br>208<br>209<br>210<br>211<br>212<br>213<br>214<br>215<br>216<br>217<br>218<br>219<br>220<br>221<br>222<br>223<br>224<br>225<br>226<br>227<br>228<br>229<br>230<br>231<br>232<br>233<br>234<br>235<br>236<br>237<br>238<br>239<br>240<br>241<br>242<br>243<br>244<br>245<br>246<br>247<br>248<br>249<br>250<br>251<br>252<br>253<br>254<br>255<br>256<br>257<br>258<br>259<br>260<br>261<br>262<br>263<br>264<br>265<br>266<br>267<br>268<br>269<br>270<br>271<br>272<br>273<br>274<br>275<br>276<br>277<br>278<br>279<br>280<br>281<br>282<br>283<br>284<br>285<br>286<br>287<br>288<br>289<br>290<br>291<br>292<br>293<br>294<br>295<br>296<br>297<br>298<br>299<br>300<br>301<br>302<br>303<br>304<br>305<br>306<br>307<br>308<br>309<br>310<br>311<br>312<br>313<br>314<br>315<br>316<br>317<br>318<br>319<br>320<br>321<br>322<br>323<br>324<br>325<br>326<br>327<br>328<br>329<br>330<br>331<br>332<br>333<br>334<br>335<br>336<br>337<br>338<br>339<br>340<br>341<br>342<br>343<br>344<br>345<br>346<br>347<br>348<br>349<br>350<br>351<br>352<br>353<br>354<br>355<br>356<br>357<br>358<br>359<br>360<br>361<br>362<br>363<br>364<br>365<br>366<br>367<br>368<br>369<br>370<br>371<br>372<br>373<br>374<br>375<br>376<br>377<br>378<br>379<br>380<br>381<br>382<br>383<br>384<br>385<br>386<br>387<br>388<br>389<br>390<br>391<br>392<br>393<br>394<br>395<br>396<br>397<br>398<br>399<br>400<br>401<br>402<br>403<br>404<br>405<br>406<br>407<br>408<br>409<br>410<br>411<br>412<br>413<br>414<br>415<br>416<br>417<br>418<br>419<br>420<br>421<br>422<br>423<br>424<br>425<br>426<br>427<br>428<br>429<br>430<br>431<br>432<br>433<br>434<br>435<br>436<br>437<br>438<br>439<br>440<br>441<br>442<br>443<br>444<br>445<br>446<br>447<br>448<br>449<br>450<br>451<br>452<br>453<br>454<br>455<br>456<br>457<br>458<br>459<br>460<br>461<br>462<br>463<br>464<br>465<br>466<br>467<br>468<br>469<br>470<br>471<br>472<br>473<br>474<br>475<br>476<br>477<br>478<br>479<br>480<br>481<br>482<br>483<br>484<br>485<br>486<br>487<br>488<br>489<br>490<br>491<br>492<br>493<br>494<br>495<br>496<br>497<br>498<br>499<br>500<br>501<br>502<br>503<br>504<br>505<br>506<br>507<br>508<br>509<br>510<br>511<br>512<br>513<br>514<br>515<br>516<br>517<br>518<br>519<br>520<br>521<br>522<br>523<br>524<br>525<br>526<br>527<br>528<br>529<br>530<br>531<br>532<br>533<br>534<br>535<br>536<br>537<br>538<br>539<br>540<br>541<br>542<br>543<br>544<br>545<br>546<br>547<br>548<br>549<br>550<br>551<br>552<br>553<br>554<br>555<br>556<br>557<br>558<br>559<br>560<br>561<br>562<br>563<br>564<br>565<br>566<br>567<br>568<br>569<br>570<br>571<br>572<br>573<br>574<br>575<br>576<br>577<br>578<br>579<br>580<br>581<br>582<br>583<br>584<br>585<br>586<br>587<br>588<br>589<br>590<br>591<br>592<br>593<br>594<br>595<br>596<br>597<br>598<br>599<br>600<br>601<br>602<br>603<br>604<br>605<br>606<br>607<br>608<br>609<br>610<br>611<br>612<br>613<br>614<br>615<br>616<br>617<br>618<br>619<br>620<br>621<br>622<br>623<br>624<br>625<br>626<br>627<br>628<br>629<br>630<br>631<br>632<br>633<br>634<br>635<br>636<br>637<br>638<br>639<br>640<br>641<br>642<br>643<br>644<br>645<br>646<br>647<br>648<br>649<br>650<br>651<br>652<br>653<br>654<br>655<br>656<br>657<br>658<br>659<br>660<br>661<br>662<br>663<br>664<br>665<br>666<br>667<br>668<br>669<br>670<br>671<br>672<br>673<br>674<br>675<br>676<br>677<br>678<br>679<br>680<br>681<br>682<br>683<br>684<br>685<br>686<br>687<br>688<br>689<br>690<br>691<br>692<br>693<br>694<br>695<br>696<br>697<br>698<br>699<br>700<br>701<br>702<br>703<br>704<br>705<br>706<br>707<br>708<br>709<br>710<br>711<br>712<br>713<br>714<br>715<br>716<br>717<br>718<br>719<br>720<br>721<br>722<br>723<br>724<br>725<br>726<br>727<br>728<br>729<br>730<br>731<br>732<br>733<br>734<br>735<br>736<br>737<br>738<br>739<br>740<br>741<br>742<br>743<br>744<br>745<br>746<br>747<br>748<br>749<br>750<br>751<br>752<br>753<br>754<br>755<br>756<br>757<br>758<br>759<br>760<br>761<br>762<br>763<br>764<br>765<br>766<br>767<br>768<br>769<br>770<br>771<br>772<br>773<br>774<br>775<br>776<br>777<br>778<br>779<br>780<br>781<br>782<br>783<br>784<br>785<br>786<br>787<br>788<br>789<br>790<br>791<br>792<br>793<br>794<br>795<br>796<br>797<br>798<br>799<br>800<br>801<br>802<br>803<br>804<br>805<br>806<br>807<br>808<br>809<br>810<br>811<br>812<br>813<br>814<br>815<br>816<br>817<br>818<br>819<br>820<br>821<br>822<br>823<br>824<br>825<br>826<br>827<br>828<br>829<br>830<br>831<br>832<br>833<br>834<br>835<br>836<br>837<br>838<br>839<br>840<br>841<br>842<br>843<br>844<br>845<br>846<br>847<br>848<br>849<br>850<br>851<br>852<br>853<br>854<br>855<br>856<br>857<br>858<br>859<br>860<br>861<br>862<br>863<br>864<br>865<br>866<br>867<br>868<br>869<br>870<br>871<br>872<br>873<br>874<br>875<br>876<br>877<br>878<br>879<br>880<br>881<br>882<br>883<br>884<br>885<br>886<br>887<br>888<br>889<br>890<br>891<br>892<br>893<br>894<br>895<br>896<br>897<br>898<br>899<br>900<br>901<br>902<br>903<br>904<br>905<br>906<br>907<br>908<br>909<br>910<br>911<br>912<br>913<br>914<br>915<br>916<br>917<br>918<br>919<br>920<br>921<br>922<br>923<br>924<br>925<br>926<br>927<br>928<br>929<br>930<br>931<br>932<br>933<br>934<br>935<br>936<br>937<br>938<br>939<br>940<br>941<br>942<br>943<br>944<br>945<br>946<br>947<br>948<br>949<br>950<br>951<br>952<br>953<br>954<br>955<br>956<br>957<br>958<br>959<br>960<br>961<br>962<br>963<br>964<br>965<br>966<br>967<br>968<br>969<br>970<br>971<br>972<br>973<br>974<br>975<br>976<br>977<br>978<br>979<br>980<br>981<br>982<br>983<br>984<br>985<br>986<br>987<br>988<br>989<br>990<br>991<br>992<br>993<br>994<br>995<br>996<br>997<br>998<br>999<br>1000 | -        |

1  
2  
3  
4  
5  
6  
7  
8  
9  
10  
11  
12  
13  
14  
15  
16  
17  
18  
19  
20  
21  
22  
23  
24  
25  
26  
27  
28  
29  
30  
31  
32  
33  
34  
35  
36  
37  
38  
39  
40  
41  
42  
43  
44  
45  
46

| Author, year of publication | Study title                                                                          | Type of study             | Database(s) | Study period (years) | Outcome description                                                                                                                                                                                                                                                                                                        | List of codes available | Validation of list of codes | EHR-related eligibility criteria for the study // Follow up requirements                                                                                                                             | Handling of outcomes occurring prior to exposure | Notes |
|-----------------------------|--------------------------------------------------------------------------------------|---------------------------|-------------|----------------------|----------------------------------------------------------------------------------------------------------------------------------------------------------------------------------------------------------------------------------------------------------------------------------------------------------------------------|-------------------------|-----------------------------|------------------------------------------------------------------------------------------------------------------------------------------------------------------------------------------------------|--------------------------------------------------|-------|
| Turner, 2016 [46]           | Ongoing impairments following transient ischaemic attack: retrospective cohort study | Nested case control study | THIN        | 2009-2013            | <u>Outcome:</u> Psychological impairment, defined as anxiety, depression and post-traumatic stress disorder.<br><br>First consultation after the index date with a Read code for symptoms or diagnosis of anxiety, depression or post-traumatic stress, plus a first prescription of an antianxiety or antidepressant drug | Yes                     | None stated                 | Practice with at least one year of up to standard data, and patients registered for at least one year with the practice.<br>//<br>Patient alive and registered with the practice 1 month after index | Not stated.                                      | -     |

SAIL – SAIL Databank - The Secure Anonymised Information Linkage Databank; THIN – The Health Improvement Network.

For peer review only

Appendix table 6. Main characteristics of the eligible studies: dementia.

| Author, year of publication | Study title                                                                                                                       | Type of study             | Database(s) | Study period (years) | Outcome description                                                                                                                                                                                                               | List of codes available | Validation of list of codes | EHR-related eligibility criteria for the study // Follow up requirements                                               | Handling of outcomes occurring prior to exposure                     | Notes |
|-----------------------------|-----------------------------------------------------------------------------------------------------------------------------------|---------------------------|-------------|----------------------|-----------------------------------------------------------------------------------------------------------------------------------------------------------------------------------------------------------------------------------|-------------------------|-----------------------------|------------------------------------------------------------------------------------------------------------------------|----------------------------------------------------------------------|-------|
| Brown, 2016 [47]            | Comparison of dementia recorded in routinely collected hospital admission data in England with dementia recorded in primary care  | Validation study          | CPRD HES    | 1990-2012            | Read codes for dementia and/or a code for a drug specifically prescribed for dementia (i.e. donepezil, galantamine, memantine and rivastigmine).                                                                                  | Yes                     | Yes                         | At least 12 months before and 12 months after the first HES record of dementia                                         | Not applicable                                                       | -     |
| Davies, 2014 [48]           | Associations of anti-hypertensive treatments with Alzheimer's disease, vascular dementia, and other dementias                     | Nested case-control study | CPRD        | 1997-2008            | Alzheimer's disease, vascular dementia, or unspecified/other dementias<br><br>Created four categories: probable Alzheimer's disease, possible Alzheimer's disease, vascular dementia, combine unspecified or other dementia.      | Yes                     | No                          | None stated                                                                                                            | Not applicable                                                       | -     |
| Donegan, 2017 [49]          | Trends in diagnosis and treatment for people with dementia in the UK from 2005 to 2015: a longitudinal retrospective cohort study | Cohort study              | CPRD        | 2005-2015            | Dementia defined using Read codes listed for the condition in the Quality and Outcomes Framework                                                                                                                                  | No                      | No                          | Patients were eligible for analysis if registered with the practice for the entire quarter of the year being analysed; | Not applicable (descriptive study of the incident cases of dementia) | -     |
| Dregan, 2015 [50]           | Are Inflammation and Related Therapy Associated with All-Cause Dementia in a Primary Care Population?                             | Matched cohort study      | CPRD        | 2002-2013            | "Medical diagnostic codes were used to identify new diagnoses of dementia including Alzheimer's disease, vascular dementia, Lewy body dementia, frontotemporal dementia, dementia in other conditions, and unspecified dementia." | No                      | No                          | None stated                                                                                                            | Considered incident cases only                                       | -     |

1  
2  
3  
4  
5  
6  
7  
8  
9  
10  
11  
12  
13  
14  
15  
16  
17  
18  
19  
20  
21  
22  
23  
24  
25  
26  
27  
28  
29  
30  
31  
32  
33  
34  
35  
36  
37  
38  
39  
40  
41  
42  
43  
44  
45  
46

| Author, year of publication | Study title                                                                                                                                    | Type of study              | Database(s)        | Study period (years) | Outcome description                                                                                                                                                                                                                                                                                                                                                                                                | List of codes available | Validation of list of codes | EHR-related eligibility criteria for the study // Follow up requirements                                                                                                  | Handling of outcomes occurring prior to exposure  | Notes                                                               |
|-----------------------------|------------------------------------------------------------------------------------------------------------------------------------------------|----------------------------|--------------------|----------------------|--------------------------------------------------------------------------------------------------------------------------------------------------------------------------------------------------------------------------------------------------------------------------------------------------------------------------------------------------------------------------------------------------------------------|-------------------------|-----------------------------|---------------------------------------------------------------------------------------------------------------------------------------------------------------------------|---------------------------------------------------|---------------------------------------------------------------------|
| Dregan, 2015 [51]           | Patterns of anti-inflammatory drug use and risk of dementia: a matched case-control study                                                      | Matched case control study | CPRD               | 1992-2014            | "Medical diagnostic codes were used to identify new diagnoses of dementia and include non-specific dementia (Eu02z), Alzheimer disease (F110), vascular dementia (Eu01), Lewy body dementia (Eu025), senile dementia (E00) and dementia in other conditions (Eu02)."                                                                                                                                               | Yes                     | No                          | None stated                                                                                                                                                               | Considered incident diagnosis                     | -                                                                   |
| Dunn, 2005 [52]             | Does lithium therapy protect against the onset of dementia?                                                                                    | Nested case control study  | CPRD               | 1992-2002            | 'Cases with definite diagnosis of Alzheimer disease, vascular dementia (with which there is a diagnostic overlap), and those with uncertain cause of dementia'                                                                                                                                                                                                                                                     | No                      | Yes<br>GP Questionnaire     | "At least 4 years of research standard data preceding the date of the diagnosis" //                                                                                       | Considered incident cases only                    | -                                                                   |
| Dunn, 2005 [53]             | Association between dementia and infectious disease: evidence from a case-control study                                                        | Nested case control study  | CPRD               | 1992-2002            | "We identified cases as all those patients with an incident dementia, as diagnosed by their GP, a GP colleague, or a hospital specialist (...). We included cases with a recorded diagnosis of Alzheimer disease, vascular dementia (with which there is diagnostic overlap), and those with uncertain cause of dementia. Other specified causes of dementia were excluded (eg, dementia in Parkinson's disease)." | No                      | Yes<br>GP questionnaires    | "At least 4 years of research standard data preceding the date of first diagnosis (median time from onset of symptoms to diagnosis has been estimated at 4 years)." // ND | Considered incident cases only                    | Cases further classified as probable or possible cases of dementia. |
| Emdin, 2016 [54]            | Blood Pressure and Risk of Vascular Dementia: Evidence From a Primary Care Registry and a Cohort Study of Transient Ischemic Attack and Stroke | Cohort study               | CPRD<br>HES<br>ONS | 1990-2003            | First record of vascular dementia, in one of the databases. For the primary analysis, cases of Alzheimer's disease and vascular dementia (i.e. mixed dementia) were included.                                                                                                                                                                                                                                      | Yes                     | No                          | Registered with the GP practice for at least one year // First 4 years of follow up excluded from analysis                                                                | First 4 years of follow up excluded from analysis | -                                                                   |

| Author, year of publication | Study title                                                                                                                                                        | Type of study             | Database(s) | Study period (years) | Outcome description                                                                                                                                              | List of codes available                                          | Validation of list of codes | EHR-related eligibility criteria for the study // Follow up requirements                                                               | Handling of outcomes occurring prior to exposure                                                                     | Notes                                         |
|-----------------------------|--------------------------------------------------------------------------------------------------------------------------------------------------------------------|---------------------------|-------------|----------------------|------------------------------------------------------------------------------------------------------------------------------------------------------------------|------------------------------------------------------------------|-----------------------------|----------------------------------------------------------------------------------------------------------------------------------------|----------------------------------------------------------------------------------------------------------------------|-----------------------------------------------|
| Goh, 2014 [55]              | Angiotensin receptor blockers and risk of dementia: cohort study in UK Clinical Practice Research Datalink                                                         | Cohort study              | CPRD        | 1995-2010            | New diagnosis of dementia, defined by Read codes, excluding specific causes of dementia (e.g. dementia in neoplastic disease).                                   | Yes                                                              | No                          | At least 6 months of registration with the GP practice // Outcome occurring in the first year after the index date were not considered | Excluded all individuals with a record of dementia or cognitive impairment prior to the date of entry in the study   | -                                             |
| Granerod, 2016 [3]          | Increased rates of sequelae post-encephalitis in individuals attending primary care practices in the United Kingdom: a population-based retrospective cohort study | Nested case control study | CPRD        | 1998-2012            | "cognitive problems (including memory loss, aphasia, difficulty processing information, difficulty reasoning, difficulty concentrating and learning disability)" | Not provided in the original study but obtained from the authors | None stated                 | None stated // At least one contact with the GP practice in the two years after the index date.                                        | Analysis restricted to those at risk of a new-onset outcome, defined as no code in the year prior to the index date. | Dementia diagnosis were considered separately |
| Hippisley-Cox, 2010 [56]    | Unintended effects of statins in men and women in England and Wales: population based cohort study using the QResearch database                                    | Cohort study              | QResearch   | 2002-2008            | Dementia, defined with Read codes, not further specified.                                                                                                        | No; states that code list is available on request                | No                          | At least one year of registration with the practice // ND                                                                              | Incident cases included in the study                                                                                 | -                                             |

1  
2  
3  
4  
5  
6  
7  
8  
9  
10  
11  
12  
13  
14  
15  
16  
17  
18  
19  
20  
21  
22  
23  
24  
25  
26  
27  
28  
29  
30  
31  
32  
33  
34  
35  
36  
37  
38  
39  
40  
41  
42  
43  
44  
45  
46

| Author, year of publication | Study title                                                                                                 | Type of study             | Database(s) | Study period (years) | Outcome description                                                                                                                                                                                                                                                                                                                                                                                                                                                                                                                                                                                                                                                                                                                                                           | List of codes available | Validation of list of codes | EHR-related eligibility criteria for the study // Follow up requirements | Handling of outcomes occurring prior to exposure     | Notes |
|-----------------------------|-------------------------------------------------------------------------------------------------------------|---------------------------|-------------|----------------------|-------------------------------------------------------------------------------------------------------------------------------------------------------------------------------------------------------------------------------------------------------------------------------------------------------------------------------------------------------------------------------------------------------------------------------------------------------------------------------------------------------------------------------------------------------------------------------------------------------------------------------------------------------------------------------------------------------------------------------------------------------------------------------|-------------------------|-----------------------------|--------------------------------------------------------------------------|------------------------------------------------------|-------|
| Imfeld, 2012 [57]           | Metformin, other antidiabetic drugs, and risk of Alzheimer's disease: a population-based case-control study | Nested case control study | CPRD        | 1998-2008            | "either a diagnosis of AD followed by at least one prescription for an AD drug or vice versa; a diagnosis of dementia followed by at least two prescriptions for an AD drug; at least two recordings of an AD diagnosis; an AD diagnosis after a specific dementia test (e.g., Mini-Mental State Examination (MMSE), Clock Drawing Test (CDT), or Abbreviated Mental Test (7-min screen)), a referral to a specialist (e.g., neurologist, geriatrician, or psychogeriatrician), an assessment based on a neuroimaging technique (e.g., magnetic resonance imaging (MRI), computed tomography (CT), or single-photon emission CT (SPECT)); or an AD diagnosis preceded or followed by any recorded dementia symptoms (e.g., memory impairment, aphasia, apraxia, or agnosia)." | No                      | Yes<br><br>GP questionnaire | Patients with >3 years of active history in the database were excluded.  | First time diagnosis of Alzheimer's disease included | -     |

For peer review only

| Author, year of publication | Study title                                                                                                          | Type of study            | Database(s) | Study period (years) | Outcome description                                                                                                                                                                                                                                                                                                                                                                                                                                                                                                                                                                                                                                                                                                                                                                                                                                                                                                                                                                                                                                                                                                 | List of codes available | Validation of list of codes  | EHR-related eligibility criteria for the study // Follow up requirements | Handling of outcomes occurring prior to exposure       | Notes                                                                                                                                                                                                                                                                                                |
|-----------------------------|----------------------------------------------------------------------------------------------------------------------|--------------------------|-------------|----------------------|---------------------------------------------------------------------------------------------------------------------------------------------------------------------------------------------------------------------------------------------------------------------------------------------------------------------------------------------------------------------------------------------------------------------------------------------------------------------------------------------------------------------------------------------------------------------------------------------------------------------------------------------------------------------------------------------------------------------------------------------------------------------------------------------------------------------------------------------------------------------------------------------------------------------------------------------------------------------------------------------------------------------------------------------------------------------------------------------------------------------|-------------------------|------------------------------|--------------------------------------------------------------------------|--------------------------------------------------------|------------------------------------------------------------------------------------------------------------------------------------------------------------------------------------------------------------------------------------------------------------------------------------------------------|
| Imfeld, 2013 [58]           | Epidemiology, co-morbidities, and medication use of patients with Alzheimer's disease or vascular dementia in the UK | Descriptive cohort study | CPRD        | 1998-2008            | "A patient was required to have either: 1) a diagnosis of AD followed by at least one prescription for an AD drug or vice versa; 2) a diagnosis of unspecific dementia followed by at least two prescriptions for an AD drug; 3) at least two recordings of an AD diagnosis; 4) an AD diagnosis after a specific dementia test (e.g., Mini Mental State Examination, Clock Drawing Test, or Abbreviated Mental Test [7-Minute Screen]), a referral to a specialist (e.g., neurologist, geriatrician or psycho-geriatrician), or an assessment based on neuroimaging technique (e.g., magnetic resonance imaging, computed tomography, or single photon emission computed tomography); or 5) an AD diagnosis preceded or followed by any recorded dementia symptoms (e.g., memory impairment, aphasia, apraxia, or agnosia). In addition, AD patients with a recording of any other specific dementia diagnosis (e.g., VaD, Pick's disease, or dementia with Lewy bodies) after the index date were not eligible, as well as those AD patients with a recording of stroke within two years prior to the index date." | No                      | Yes<br><br>GP questionnaires | None stated                                                              | Considered incident cases during the study period only | "cases were not eligible if they had had a stroke before the index date (because this is more indicative of a diagnosis of vascular dementia (VaD) <sup>16</sup> ) or a recording of any other specific dementia diagnosis (e.g., VaD, Pick's disease, or Lewy body dementia) after the index date." |



1  
2  
3  
4  
5  
6  
7  
8  
9  
10  
11  
12  
13  
14  
15  
16  
17  
18  
19  
20  
21  
22  
23  
24  
25  
26  
27  
28  
29  
30  
31  
32  
33  
34  
35  
36  
37  
38  
39  
40  
41  
42  
43  
44  
45  
46

| Author, year of publication | Study title                                                                                                 | Type of study             | Database(s) | Study period (years) | Outcome description                                                                                                                                                                                                                                                                                                                                                                                                                                                                                                                                                                                                                                                                                                                                                                                                                                                                                                                                                                             | List of codes available | Validation of list of codes                                                               | EHR-related eligibility criteria for the study // Follow up requirements      | Handling of outcomes occurring prior to exposure       | Notes |
|-----------------------------|-------------------------------------------------------------------------------------------------------------|---------------------------|-------------|----------------------|-------------------------------------------------------------------------------------------------------------------------------------------------------------------------------------------------------------------------------------------------------------------------------------------------------------------------------------------------------------------------------------------------------------------------------------------------------------------------------------------------------------------------------------------------------------------------------------------------------------------------------------------------------------------------------------------------------------------------------------------------------------------------------------------------------------------------------------------------------------------------------------------------------------------------------------------------------------------------------------------------|-------------------------|-------------------------------------------------------------------------------------------|-------------------------------------------------------------------------------|--------------------------------------------------------|-------|
| Imfeld, 2015 [59]           | Benzodiazepine Use and Risk of Developing Alzheimer's Disease or Vascular Dementia: A Case-Control Analysis | Case control              | CPRD        | 1998-2013            | "first time diagnosis of AD, VaD, or any unspecified dementia (based on Read codes) (...), or who received a first-time prescription for an acetylcholinesterase inhibitor (i.e. donepezil, rivastigmine, galantamine, or tacrine) or the N-methyl-D-aspartate (NMDA) receptor antagonist memantine (...) To increase the probability of including only well-defined AD or VaD cases, a validated algorithm was applied (...) this algorithm was based on recordings of specific dementia tests [e.g. Mini-Mental State Examination (MMSE), Clock Drawing Test (CDT), or Abbreviated Mental Test (7-Minute Screen)], referrals to specialists (e.g. neurologists, geriatricians or psycho-geriatricians), brain imaging [computed tomography (CT), magnetic resonance imaging (MRI), or single photon emission computed tomography (SPECT)], or dementia symptoms (memory impairment, aphasia, apraxia, or agnosia) supportive of a diagnosis of a specific dementia subtype (i.e. AD or VaD)." | No                      | Yes<br><br>GP questionnaire                                                               | At least three years of active history in the database before diagnosis // ND | Considered incident cases during the study period only | -     |
| Jick, 2000 [60]             | Statins and the risk of dementia                                                                            | Nested case control study | CPRD        | 1992-1998            | First time diagnosis of dementia or Alzheimer's disease                                                                                                                                                                                                                                                                                                                                                                                                                                                                                                                                                                                                                                                                                                                                                                                                                                                                                                                                         | No                      | No but refers to previous study where the validity of the same list of codes was assessed | None stated                                                                   | Incidence cases considered only                        | -     |

| Author, year of publication | Study title                                                                                           | Type of study | Database(s) | Study period (years) | Outcome description                                                                    | List of codes available                          | Validation of list of codes                                      | EHR-related eligibility criteria for the study // Follow up requirements                                                            | Handling of outcomes occurring prior to exposure                              | Notes |
|-----------------------------|-------------------------------------------------------------------------------------------------------|---------------|-------------|----------------------|----------------------------------------------------------------------------------------|--------------------------------------------------|------------------------------------------------------------------|-------------------------------------------------------------------------------------------------------------------------------------|-------------------------------------------------------------------------------|-------|
| Judge, 2017 [61]            | Protective effect of anti-rheumatic drugs on dementia in rheumatoid arthritis patients                |               | CPRD        | 1995-2011            | Dementia, including Alzheimer's dementia, vascular dementia, and mixed dementia.       | Yes                                              | No                                                               | At least one year of up to standard registration data before the index date<br>//<br>ND                                             | Considered incident cases only                                                | -     |
| Khan, 2011 [62]             | Long-term health outcomes in a British cohort of breast, colorectal and prostate cancer survivors     | Cohort study  | CPRD        | 2003-2006            | Dementia, defined with Read codes, not further specified                               | No; states that codes are available upon request | No                                                               | None stated                                                                                                                         | Only incident cases were considered                                           | -     |
| Khosrow-Khavar, 2017 [63]   | Androgen deprivation therapy and the risk of dementia in patients with prostate cancer                | Cohort study  | CPRD        | 1988-2016            | All incident cases of dementia, including Alzheimer's disease                          | Yes                                              | None stated (refers to validation in previous studies)           | Patients with less than 1 year of history in CPRD were excluded<br>//<br>All patients had to have at least 1 year of follow up data | Excluded patients with previous diagnosis of any dementia                     | -     |
| Lu, 2016 [64]               | Gout and the risk of Alzheimer's disease: a population-based, BMI-matched cohort study                | Cohort study  | THIN        | 1995-2013            | Alzheimer's disease                                                                    | Yes                                              | Not in the original study; refers to a previous validation study | None stated                                                                                                                         | First diagnoses only                                                          | -     |
| Mehta, 2017 [65]            | Association of Hypoglycaemia With Subsequent Dementia in Older Patients With Type 2 Diabetes Mellitus | Cohort study  | CPRD        | 2002-2012            | Dementia defined by Read codes; used the same list of codes as another previous study. | No                                               | None stated                                                      | None stated                                                                                                                         | Excluded patients with dementia diagnosed in the year prior to the index date | -     |

1  
2  
3  
4  
5  
6  
7  
8  
9  
10  
11  
12  
13  
14  
15  
16  
17  
18  
19  
20  
21  
22  
23  
24  
25  
26  
27  
28  
29  
30  
31  
32  
33  
34  
35  
36  
37  
38  
39  
40  
41  
42  
43  
44  
45  
46

| Author, year of publication | Study title                                                                                                                                           | Type of study | Database(s) | Study period (years) | Outcome description                                                                                                                                                                                                          | List of codes available | Validation of list of codes | EHR-related eligibility criteria for the study // Follow up requirements | Handling of outcomes occurring prior to exposure                              | Notes                                                                                              |
|-----------------------------|-------------------------------------------------------------------------------------------------------------------------------------------------------|---------------|-------------|----------------------|------------------------------------------------------------------------------------------------------------------------------------------------------------------------------------------------------------------------------|-------------------------|-----------------------------|--------------------------------------------------------------------------|-------------------------------------------------------------------------------|----------------------------------------------------------------------------------------------------|
| Mehta, 2016 [66]            | Development and validation of the RxDx-Dementia risk index to predict dementia in patients with type 2 diabetes and hypertension                      | Cohort study  | CPRD        | 2003-2012            | Dementia, defined with a previously validated algorithm (refers to previous publication)                                                                                                                                     | No                      | None stated                 | None stated                                                              | Considered incident cases only                                                | Sensitivity analysis include the definition of dementia as clinical diagnosis or drug prescription |
| Perera, 2018 [67]           | Dementia prevalence and incidence in a federation of European Electronic Health Record databases: The European Medical Informatics Framework resource | Cohort study  | THIN        | 2004-2012            | 'Codes that clearly indicated a dementia diagnosis, rather than those that were suggestive'                                                                                                                                  | Yes                     | No                          | None stated                                                              | Not applicable (calculated incidence estimates)                               | -                                                                                                  |
| Qizilbash, 2015 [68]        | BMI and risk of dementia in two million people over two decades: a retrospective cohort study                                                         | Cohort study  | CPRD        | 1992-2007            | "Patients were classified as having dementia if, any of the following terms were recorded during follow-up: dementia, Alzheimer, Lewy body disease, Pick's disease. Dementia recorded on a death certificate was also used." | No                      | None stated                 | None stated                                                              | Excluded patients with dementia diagnosed in the year prior to the index date | -                                                                                                  |
| Seshadri, 2001 [69]         | Postmenopausal estrogen replacement therapy and the risk of Alzheimer disease                                                                         | Cohort study  | CPRD        | 1992-1998            | First-time diagnosis of Alzheimer's disease, senile dementia or presenile dementia                                                                                                                                           | No                      | Yes<br>Case review          | None stated                                                              | Only first time diagnosis were included                                       | -                                                                                                  |

| Author, year of publication | Study title                                                                                                                    | Type of study             | Database(s) | Study period (years) | Outcome description                                                                                                                                                                                                                                                                                                                                                                                                                                                                                      | List of codes available                                          | Validation of list of codes                 | EHR-related eligibility criteria for the study // Follow up requirements                                    | Handling of outcomes occurring prior to exposure                                     | Notes                                     |
|-----------------------------|--------------------------------------------------------------------------------------------------------------------------------|---------------------------|-------------|----------------------|----------------------------------------------------------------------------------------------------------------------------------------------------------------------------------------------------------------------------------------------------------------------------------------------------------------------------------------------------------------------------------------------------------------------------------------------------------------------------------------------------------|------------------------------------------------------------------|---------------------------------------------|-------------------------------------------------------------------------------------------------------------|--------------------------------------------------------------------------------------|-------------------------------------------|
| Strom, 2015 [70]            | Statin therapy and risk of acute memory impairment                                                                             | Nested case-control study | THIN        | 1987-2013            | "The outcome for this study was the onset of acute, reversible memory impairment. Using Read codes Clinical Terms, version 2 (...), we sought codes with descriptions specifically pertaining to memory loss including amnesia, amnesia symptom, memory loss symptom, temporary loss of memory, short-term memory loss, transient global amnesia, drug-induced amnesic syndrome, non-alcoholic amnesic syndrome, amnesia (retrograde), memory lapses, minor memory lapses, and mild memory disturbance." | Yes                                                              | Yes<br>GP questionnaire for a random sample | At least one 365 of registration with the GP practice                                                       | Patients with codes for acute memory loss before the index date were excluded.       | Excluded patients diagnosed with dementia |
| Turner, 2016 [46]           | Ongoing impairments following transient ischaemic attack: retrospective cohort study                                           | Matched-cohort study      | THIN        | 2009-2013            | Read codes for diagnoses (such as 28E0.00: mild cognitive impairment) and symptoms (such as 1B1A.12: memory loss symptom) related to overall cognitive impairment and impaired individual cognitive domains. 'Cognitive impairment included memory, attention, spatial awareness, perception, apraxia and executive functioning impairments but not a diagnosis of dementia.'                                                                                                                            | Not provided in the original study but obtained from the authors | None stated                                 | Patients alive and registered with the practice 1 month after the index date                                | Excluded patients with fatigue recorded on the index date                            | Dementia diagnosis were not included      |
| Walters, 2016 [71]          | Predicting dementia risk in primary care: development and validation of the Dementia risk score using routinely collected data |                           | THIN        | 2000-2011            | Newly recorded dementia diagnoses, including Alzheimer's disease, vascular dementia, and unspecified or mixed dementia.<br><br>Excluding dementia associated with Parkinson's disease, Lewy body dementia, Huntingdon, Picks, HIV and drug induced and alcohol-related dementia.                                                                                                                                                                                                                         | No but available upon request from the authors                   | No                                          | Excluded patients with less than one year of follow up data // follow up restricted to a maximum of 5 years | Excluded patients with dementia, cognitive impairment or memory symptoms at baseline | -                                         |

CPRD – Clinical Practice Research Datalink; GP – general practitioner; HES – Hospital Episodes Statistics; THIN – The Health Improvement Network; ONS – Office for National Statistics.

Appendix table 7. Main characteristics of the eligible studies: fatigue.

| Author, year of publication | Study title                                                                                                                            | Type of study                              | Database(s) | Study period (years)    | Outcome description                                                                                                                                       | List of codes available                                                          | Validation of list of codes | EHR-related eligibility criteria for the study // Follow up requirements                                                      | Handling of outcomes occurring prior to exposure                                                                                                                                                               | Notes                                                                                                             |
|-----------------------------|----------------------------------------------------------------------------------------------------------------------------------------|--------------------------------------------|-------------|-------------------------|-----------------------------------------------------------------------------------------------------------------------------------------------------------|----------------------------------------------------------------------------------|-----------------------------|-------------------------------------------------------------------------------------------------------------------------------|----------------------------------------------------------------------------------------------------------------------------------------------------------------------------------------------------------------|-------------------------------------------------------------------------------------------------------------------|
| Donegan, 2013 [72]          | Bivalent human papillomavirus vaccine and the risk of fatigue syndromes in girls in the UK                                             | Ecological and self-controlled case series | CPRD        | 2000-2011 and 2008-2011 | Chronic fatigue syndrome including chronic fatigue syndrome/myalgic asthenia, post-viral fatigue syndrome, fibromyalgia, and neurasthenia.                | No<br><br>(Obtained from the authors)                                            | None stated                 | None stated // At least one year of follow up available                                                                       | None stated                                                                                                                                                                                                    | Sensitivity analysis considered 'incident fatigue' at the earliest recording of symptoms, referrals or diagnoses. |
| Collin, 2017 [73]           | Trends in the incidence of chronic fatigue syndrome and fibromyalgia in the UK, 2001-2013: a Clinical Practice Research Datalink Study | Descriptive cohort study                   | CPRD        | 2001-2013               | Diagnoses of chronic fatigue syndrome, fibromyalgia, post-viral fatigue syndrome, or asthenia/debility diagnosis or referral to a specialist service      | Yes                                                                              | None stated                 | At least 12 months of up to standard data                                                                                     | Only new first ever diagnosis were considered                                                                                                                                                                  | Symptoms of fatigue were considered separately.                                                                   |
| Gallagher, 2004 [74]        | Incidence of fatigue symptoms and diagnoses presenting in UK primary care from 1990 to 2001.                                           | Descriptive cohort study                   | CPRD        | 1990-2001               | Read codes for diagnosis of chronic fatigue syndrome; post-viral fatigue syndrome; asthenia/debility. Read codes for symptoms were classified separately. | No<br><br>(Stated that was available from the authors but could not be obtained) | None stated                 | Data prior to 1990 not shown due to lower numbers than expected and being the first years of data collection of the database. | Fatigue diagnosis was incident if there was no record of diagnoses in the previous year, with or without previous symptoms; symptoms were incident if there was no symptoms or diagnoses in the previous year. | -                                                                                                                 |
| Hamilton, 2009 [75]         | Risk markers for both chronic fatigue and irritable bowel syndromes: A prospective case-control study in primary care                  | Nested case control study                  | CPRD        | 1988-2001               | List of diagnostic codes for post-viral fatigue syndrome; chronic fatigue syndrome.                                                                       | No<br><br>(refers to another publication)                                        | None stated                 | Only patients with complete records for 3 years prior to the index date were included                                         | Not applicable                                                                                                                                                                                                 | -                                                                                                                 |

1  
2  
3  
4  
5  
6  
7  
8  
9  
10  
11  
12  
13  
14  
15  
16  
17  
18  
19  
20  
21  
22  
23  
24  
25  
26  
27  
28  
29  
30  
31  
32  
33  
34  
35  
36  
37  
38  
39  
40  
41  
42  
43  
44  
45  
46

|                     |                                                                                              |                                  |      |           |                                                                                                                                                                                                  |                                                                                  |             |                                                                                                                                                                                                      |                                                                     |   |
|---------------------|----------------------------------------------------------------------------------------------|----------------------------------|------|-----------|--------------------------------------------------------------------------------------------------------------------------------------------------------------------------------------------------|----------------------------------------------------------------------------------|-------------|------------------------------------------------------------------------------------------------------------------------------------------------------------------------------------------------------|---------------------------------------------------------------------|---|
| Petersen, 2006 [34] | Risk and predictors of fatigue after infectious mononucleosis in a large primary-care cohort | Nested case control cohort study | CPRD | 1989-2000 | Read codes for diagnoses of post-viral debility, post-viral fatigue syndromes, post-influenza debility and syndrome post-viral; symptoms of tiredness, malaise, lethargy, debility, and fatigue. | No<br><br>(Stated that was available from the authors but could not be obtained) | None stated | At least one year of data before diagnosis<br>//<br>At least one year of complete follow up after diagnosis                                                                                          | Included patients who did not have fatigue in the year before onset | - |
| Turner, 2016 [46]   | Ongoing impairments following transient ischaemic attack: retrospective cohort study         | Nested case-cohort study         | THIN | 2009-2013 | First consultation after the index date with a Read code for symptoms or diagnosis of fatigue                                                                                                    | No<br><br>Obtained from the authors                                              | None stated | Practice with at least one year of up to standard data, and patients registered for at least one year with the practice.<br>//<br>Patient alive and registered with the practice 1 month after index | Excluded patients with fatigue recorded on the index date.          | - |

CPRD – Clinical Practice Research Datalink; THIN – The Health Improvement Network.

Review only

1  
2  
3 **Appendix table 8. Main characteristics of the eligible studies: pain.**  
4

5  
6  
7  
8  
9

| Author, year of publication | Study title                                                                                                     | Type of study             | Database(s) | Study period (years) | Outcome description                                                                                                                                                                                                                                                                                                                                                                                                                                                                                                                                                                                                    | List of codes available | Validation of list of codes | EHR-related eligibility criteria for the study // Follow up requirements | Handling of outcomes occurring prior to exposure | Notes |
|-----------------------------|-----------------------------------------------------------------------------------------------------------------|---------------------------|-------------|----------------------|------------------------------------------------------------------------------------------------------------------------------------------------------------------------------------------------------------------------------------------------------------------------------------------------------------------------------------------------------------------------------------------------------------------------------------------------------------------------------------------------------------------------------------------------------------------------------------------------------------------------|-------------------------|-----------------------------|--------------------------------------------------------------------------|--------------------------------------------------|-------|
| 10 Becker, 2007 [76]        | Migraine incidence, comorbidity and health resource utilization in the UK                                       | Nested case-control study | CPRD        | 1994-2001            | <u>Migraine diagnosis</u>                                                                                                                                                                                                                                                                                                                                                                                                                                                                                                                                                                                              | No                      | Yes<br>GP questionnaire     | None stated                                                              | First-time diagnosis only                        | -     |
| 14 Campbell, 2015 [77]      | In sickness and in health: A cross-sectional analysis of concordance for musculoskeletal pain in 13,507 couples | Descriptive               | CiPCA       | 2005-2006            | Widespread body pain: "All relevant codes were formed into the five most common consultation body regions (back, knee, neck, shoulder, foot), as well as codes for osteoarthritis consultations. A further category of 'any musculoskeletal' consultations were formed inclusive of the above body regions and conditions, as well as consultations for unspecified pain (e.g. arthralgia), widespread pain conditions and other single body regions where the proportion of consultations were too few to perform meaningful separate analysis (e.g. head, arm, elbow, wrist, hand, hip, pelvis, thigh and buttock)." | Yes                     | None stated                 | None stated                                                              | None stated                                      | -     |

11  
12  
13  
14  
15  
16  
17  
18  
19  
20  
21  
22  
23  
24  
25  
26  
27  
28  
29  
30  
31  
32  
33  
34  
35  
36  
37  
38  
39  
40  
41  
42  
43  
44  
45  
46

1  
2  
3  
4  
5  
6  
7  
8  
9  
10  
11  
12  
13  
14  
15  
16  
17  
18  
19  
20  
21  
22  
23  
24  
25  
26  
27  
28  
29  
30  
31  
32  
33  
34  
35  
36  
37  
38  
39  
40  
41  
42  
43  
44  
45  
46

| Author, year of publication | Study title                                                                     | Type of study | Database(s) | Study period (years) | Outcome description                                                                                                                                                                                                                                                                                                                                                                                                                                                                                                                                                                                                                                                                                                                                                                                                                                                                | List of codes available | Validation of list of codes | EHR-related eligibility criteria for the study // Follow up requirements | Handling of outcomes occurring prior to exposure | Notes |
|-----------------------------|---------------------------------------------------------------------------------|---------------|-------------|----------------------|------------------------------------------------------------------------------------------------------------------------------------------------------------------------------------------------------------------------------------------------------------------------------------------------------------------------------------------------------------------------------------------------------------------------------------------------------------------------------------------------------------------------------------------------------------------------------------------------------------------------------------------------------------------------------------------------------------------------------------------------------------------------------------------------------------------------------------------------------------------------------------|-------------------------|-----------------------------|--------------------------------------------------------------------------|--------------------------------------------------|-------|
| Hall, 2006 [78]             | Epidemiology and treatment of neurophatic pain: the UK primary care perspective | Descriptive   | CPRD        | 1992-2002            | “A <u>post-herpetic neuralgia</u> record was a specific term for post-herpetic neuralgia or an acute herpes zoster term plus either neuropathy, or neuropathic pain, 3-6 months after the first acute herpes zoster entry. A <u>trigeminal neuralgia</u> record had a specific term for this diagnosis. <u>Phantom limb pain</u> was defined as a specific term or a term for amputation plus either a neuropathy or neuropathic pain record 3–24 months after the first amputation code. Patients were included in the painful <u>diabetic neuropathy</u> cohort if their record contained a specific term; a term for diabetic neuropathy with a prescription for a treatment for pain current at the date of diagnosis; a record of diabetes and neuropathic pain or record of diabetes and both neuralgia and a treatment for pain current on the date of the neuralgia code.” | No                      | None stated                 | At least year of up to standard data                                     | None stated                                      | -     |

For peer review only



1  
2  
3  
4  
5  
6  
7  
8  
9  
10  
11  
12  
13  
14  
15  
16  
17  
18  
19  
20  
21  
22  
23  
24  
25  
26  
27  
28  
29  
30  
31  
32  
33  
34  
35  
36  
37  
38  
39  
40  
41  
42  
43  
44  
45  
46

| Author, year of publication | Study title                                                                                                         | Type of study             | Database(s) | Study period (years) | Outcome description                                                                                                                                                                                                                                                                                                                                                                                                                                                                                                                                                                                                                                                                                                                                                                                                                                                                                                                                                                                                                                                                                                                                                                   | List of codes available | Validation of list of codes  | EHR-related eligibility criteria for the study // Follow up requirements | Handling of outcomes occurring prior to exposure | Notes       |
|-----------------------------|---------------------------------------------------------------------------------------------------------------------|---------------------------|-------------|----------------------|---------------------------------------------------------------------------------------------------------------------------------------------------------------------------------------------------------------------------------------------------------------------------------------------------------------------------------------------------------------------------------------------------------------------------------------------------------------------------------------------------------------------------------------------------------------------------------------------------------------------------------------------------------------------------------------------------------------------------------------------------------------------------------------------------------------------------------------------------------------------------------------------------------------------------------------------------------------------------------------------------------------------------------------------------------------------------------------------------------------------------------------------------------------------------------------|-------------------------|------------------------------|--------------------------------------------------------------------------|--------------------------------------------------|-------------|
| Hall, 2013 [79]             | An observational descriptive study of the epidemiology and treatment of neuropathic pain in a UK general population | Cohort study, descriptive | CPRD        | 2005-2010            | “Five neuropathic pain cohorts ( <u>post-herpetic neuralgia, painful diabetic neuropathy, phantom limb pain, neuropathic back pain and neuropathic postoperative pain</u> ) were identified from (...) a single specific Read code, or a combination of Read and therapy codes as specified in a case definition. Postherpetic neuralgia was defined as a specific code for post-herpetic neuralgia, or a code for acute zoster plus either a code for neuropathy, or neuropathic pain, between three and six months after the first acute zoster entry. Phantom limb pain (PLP) was defined as a specific code, or a code for amputation plus either a code for neuropathy or neuropathic pain between three and twenty-four months after the first amputation code. The painful diabetic neuropathy cohort included patients with a specific code for painful diabetic neuropathy; those with a code for diabetes and a general code for neuropathic pain and a third group with a code for diabetic neuropathy (or diabetes and neuralgia) with a prescription for a neuropathic pain treatment which was initiated within 28 days of the date of the neuropathy/ neuralgia code.” | No                      | Yes<br><br>GP questionnaires | At least of 1 year of data of good quality for research                  |                                                  | None stated |

1  
2  
3  
4  
5  
6  
7  
8  
9  
10  
11  
12  
13  
14  
15  
16  
17  
18  
19  
20  
21  
22  
23  
24  
25  
26  
27  
28  
29  
30  
31  
32  
33  
34  
35  
36  
37  
38  
39  
40  
41  
42  
43  
44  
45  
46

| Author, year of publication | Study title                                                                        | Type of study        | Database(s) | Study period (years) | Outcome description                                                                                                                                                                                                                                                                                                                                                                                                                                                                                                                                                                                                                                | List of codes available | Validation of list of codes | EHR-related eligibility criteria for the study // Follow up requirements                                                    | Handling of outcomes occurring prior to exposure                                                                                     | Notes |
|-----------------------------|------------------------------------------------------------------------------------|----------------------|-------------|----------------------|----------------------------------------------------------------------------------------------------------------------------------------------------------------------------------------------------------------------------------------------------------------------------------------------------------------------------------------------------------------------------------------------------------------------------------------------------------------------------------------------------------------------------------------------------------------------------------------------------------------------------------------------------|-------------------------|-----------------------------|-----------------------------------------------------------------------------------------------------------------------------|--------------------------------------------------------------------------------------------------------------------------------------|-------|
| Mansfield, 2017 [80]        | Identifying patients with chronic widespread pain in primary care                  | Cross sectional      | CiPCA       | 2005-2009            | (A) <u>Recurrent region pain</u> , define as: "In a period of 5 consecutive years, a patient fulfils all of 1-4:<br>1. At least 1 consultation for a musculoskeletal complaint in the axial skeleton (neck and back);<br>2. At least 1 consultation for an upper- or lower-limb complaint;<br>3. At least 1 consultation for a regional musculoskeletal complaint in each of 3 separate years;<br>4. At least 4 consultations for regional musculoskeletal complaints during the 5-year period."<br><br>(B) "Non specific <u>generalized pain conditions</u> , including fibromyalgia, fibrositis, rheumatism, myalgia, arthralgia, and polyalgia" | Yes                     | Yes                         | Patients not registered with the practice for the full 5-year period were excluded                                          | Not applicable (cross sectional analysis)                                                                                            | -     |
| Ruigomez, 2006 [81]         | Chest pain in general practice: incidence, comorbidity and mortality               | Case control study   | CPRD        | 1996                 | <u>Chest pain:</u><br>Codes for chest pain that did specify the type or location of the symptom.                                                                                                                                                                                                                                                                                                                                                                                                                                                                                                                                                   | Yes                     | None stated                 | Registered with the GP for at least 2 years<br>//<br>At least one entry in the records in the last 3 years before the study | Excluded patients with history of pain the past 2 years                                                                              | -     |
| Wallander, 2007 [82]        | Unspecified abdominal pain in primary care: The role of gastrointestinal morbidity | Matched cohort study | CPRD        | Before 1996          | <u>Abdominal pain:</u><br>Diagnosis of abdominal pain                                                                                                                                                                                                                                                                                                                                                                                                                                                                                                                                                                                              | Yes                     | None stated                 | At least one entry to the data in the three years prior to the study start.                                                 | Patients were excluded if they had a record of abdominal pain of any abdominal site or type in the 2 years before the study started. | -     |

1  
2  
3  
4  
5  
6  
7  
8  
9  
10  
11  
12  
13  
14  
15  
16  
17  
18  
19  
20  
21  
22  
23  
24  
25  
26  
27  
28  
29  
30  
31  
32  
33  
34  
35  
36  
37  
38  
39  
40  
41  
42  
43  
44  
45  
46

| Author, year of publication | Study title                                                                                                         | Type of study | Database(s)                       | Study period (years) | Outcome description                                                                                                                                                                                                                                                                                                                                                                                                                                                                                                                                                                                                                                                                                                                                                                                                                                                                                                                | List of codes available | Validation of list of codes | EHR-related eligibility criteria for the study // Follow up requirements | Handling of outcomes occurring prior to exposure                                                              | Notes |
|-----------------------------|---------------------------------------------------------------------------------------------------------------------|---------------|-----------------------------------|----------------------|------------------------------------------------------------------------------------------------------------------------------------------------------------------------------------------------------------------------------------------------------------------------------------------------------------------------------------------------------------------------------------------------------------------------------------------------------------------------------------------------------------------------------------------------------------------------------------------------------------------------------------------------------------------------------------------------------------------------------------------------------------------------------------------------------------------------------------------------------------------------------------------------------------------------------------|-------------------------|-----------------------------|--------------------------------------------------------------------------|---------------------------------------------------------------------------------------------------------------|-------|
| Zondervan, 1999 [83]        | Prevalence and incidence of chronic pelvic pain in primary care: evidence from a national general practice database | Cohort study  | Mediplus UK primary care database | 1991-1995            | <p><u>Chronic pelvic pain</u>: pain in the lower abdominal region persisting for at least six months.</p> <p>“Episode of chronic pelvic pain: pelvic pain on two or more contacts, with at least six months (≥ 183 days) between the first and the last contact but with no period of more than one year (&gt; 365 days) without a pelvic pain contact. An episode of chronic pelvic pain was defined as starting six months after the first contact and finishing at the contact preceding a pain-free, one-year interval (if any).”</p> <p>“Excluded pain due to malignancy; chronic inflammatory and other defined bowel diseases such as Crohn’s, coeliac disease, ulcerative colitis; acute conditions verified by having surgery such as appendectomy, cholecystectomy; or pregnancy. Women with pelvic pain occurring only during menstruation (dysmenorrhoea) or sexual intercourse (dyspareunia) were also excluded.”</p> | No                      | None stated                 | None stated                                                              | Not applicable. Monthly incidence estimated as the number of new episodes in a given month as a proportion of | -     |

CiPCA - The Consultations in Primary Care Archive; CPRD – Clinical Practice Research Datalink;. NSAIDS - Nonsteroidal anti-inflammatory drug.

Appendix table 9. Main characteristics of the eligible studies: sexual dysfunction.

| Author, year of publication | Study title                                                                                                                                                                                           | Type of study             | Database(s) | Study period (years) | Outcome description                                                                                                                                                                                                                                                                                                                                                                                                                                                                                                                                               | List of codes available | Validation of list of codes | EHR-related eligibility criteria for the study // Follow up requirements  | Handling of outcomes occurring prior to exposure                           | Notes |
|-----------------------------|-------------------------------------------------------------------------------------------------------------------------------------------------------------------------------------------------------|---------------------------|-------------|----------------------|-------------------------------------------------------------------------------------------------------------------------------------------------------------------------------------------------------------------------------------------------------------------------------------------------------------------------------------------------------------------------------------------------------------------------------------------------------------------------------------------------------------------------------------------------------------------|-------------------------|-----------------------------|---------------------------------------------------------------------------|----------------------------------------------------------------------------|-------|
| Blumentals, 2003 [84]       | Antihypertensive treatment and erectile dysfunction in a cohort of type II diabetes patients                                                                                                          | Nested case-control study | CPRD        | 1987-2001            | Erectile dysfunction, ascertained from the diagnosis codes, not further specified                                                                                                                                                                                                                                                                                                                                                                                                                                                                                 | No                      | None stated                 | None stated                                                               | None stated                                                                | -     |
| Hagberg, 2016 [85]          | Risk of erectile dysfunction associated with use of 5-alpha reductase inhibitors for benign prostatic hyperplasia or alopecia: population based studies using the Clinical Practice Research Datalink | Nested case control study | CPRD        | 1992-2011            | <u>Erectile dysfunction</u> : "diagnosis of erectile dysfunction or impotence, prescription for a phosphodiesterase type 5 inhibitor (eg, sildenafil, tadalafil, or vardenafil) where the strength and quantity prescribed was indicated for treatment of erectile dysfunction, or record of procedures for treatment of erectile dysfunction (eg, penile prosthesis, penile injection, or other operations for treatment of erectile dysfunction)."<br><u>Non-erectile dysfunction</u> : including ejaculatory disorder, psychosexual dysfunction, or low libido | No                      | None stated                 | At least 3 years of history before the cohort entry date;                 | Incident cases considered after the index date.                            | -     |
| Khan, 2011 [82]             | Long-term health outcomes in a British cohort of breast, colorectal and prostate cancer survivors: a database study                                                                                   | Cohort study              | CPRD        | 2003-2006            | Erectile dysfunction: "new prescriptions for sildenafil (Viagra, Pfizer, NY, United States), apomorphone hydrochloride, vardenafil (Levitra, Bayer Healthcare Pharmaceuticals, New Haven, USA), alprostadil (an injectable treatment) and tadalafil (Cialis, Lilly, USA)"                                                                                                                                                                                                                                                                                         | No                      | None stated                 | None stated                                                               | Excluded patients with erectile dysfunction recorded before the index date | -     |
| Morant, 2008 [86]           | Increased sexual dysfunction in men with storage and voiding lower urinary tract symptoms                                                                                                             | Cross-sectional analysis  | THIN        | 2000-2007            | Male sexual dysfunction                                                                                                                                                                                                                                                                                                                                                                                                                                                                                                                                           | Yes                     | None stated                 | None stated                                                               | None stated                                                                | -     |
| Schlesinger, 2018 [87]      | Gout and the Risk of Incident Erectile Dysfunction: A Body Mass Index-matched Population-based Study                                                                                                  | Cohort study              | THIN        | 1995-2012            | Erectile dysfunction noted by the presence of the Read code E227311                                                                                                                                                                                                                                                                                                                                                                                                                                                                                               | Yes                     | None stated                 | At least one year of registration with the practice before the index date | Excluded prevalent cases at baseline                                       | -     |

1  
2  
3  
4  
5  
6  
7  
8  
9  
10  
11  
12  
13  
14  
15  
16  
17  
18  
19  
20  
21  
22  
23  
24  
25  
26  
27  
28  
29  
30  
31  
32  
33  
34  
35  
36  
37  
38  
39  
40  
41  
42  
43  
44  
45  
46

| Author, year of publication | Study title                                                                            | Type of study | Database(s) | Study period (years) | Outcome description                                                             | List of codes available | Validation of list of codes | EHR-related eligibility criteria for the study // Follow up requirements | Handling of outcomes occurring prior to exposure                                                                                 | Notes |
|-----------------------------|----------------------------------------------------------------------------------------|---------------|-------------|----------------------|---------------------------------------------------------------------------------|-------------------------|-----------------------------|--------------------------------------------------------------------------|----------------------------------------------------------------------------------------------------------------------------------|-------|
| Sultan, 2017 [88]           | Gout and subsequent erectile dysfunction: a population-based cohort study from England | Cohort study  | CPRD, HES   | 1998-2004            | Erectile dysfunction, ascertained from the medical codes, not further specified | Yes                     | None stated                 | At least 1 year of follow up data                                        | Only incident cases after the index date were considered; cases in the first 6 months of registration were considered prevalent. | -     |

CPRD – Clinical Practice Research Datalink; HES – Hospital Episodes Statistics; THIN – The Health Improvement Network.

peer review only

Appendix table 10. Main characteristics of the eligible studies: sleep disorder.

| Author,<br>year of<br>publication | Study title                                                                            | Type of study        | Database(s)     | Study<br>period<br>(years) | Outcome description                                                                               | List of<br>codes<br>available | Validation<br>of list of<br>codes | EHR-related<br>eligibility criteria<br>for the study<br>//<br>Follow up<br>requirements                                  | Handling of<br>outcomes<br>occurring prior<br>to exposure                                                        | Notes |
|-----------------------------------|----------------------------------------------------------------------------------------|----------------------|-----------------|----------------------------|---------------------------------------------------------------------------------------------------|-------------------------------|-----------------------------------|--------------------------------------------------------------------------------------------------------------------------|------------------------------------------------------------------------------------------------------------------|-------|
| Boddy, 2013<br>[89]               | The association of gout with sleep disorders: A cross-sectional study in primary care  | Matched cohort study | CiPCA and PiPCA | 2001-2008                  | Read codes for sleep disorders, excluding codes for sleep apnoea which were classified separately | Yes                           | None stated                       | None stated                                                                                                              | None stated                                                                                                      | -     |
| Wallander, 2007 [90]              | Morbidity associated with sleep disorders in primary care: A longitudinal cohort study | Cohort study         | CPRD            | 1996                       | Read codes for sleep disorder including insomnia, hypersomnia, and sleep disturbance              | Yes                           | None stated                       | Registered with a general practitioner for at least 2 years and having at least 1 entry in CPRD in the previous 3 years. | Patients with a consultation for sleep disorders during the 2 years before the start of the study were excluded. | -     |

CPRD – Clinical Practice Research Datalink; CiPCA - The Consultations in Primary Care Archive; PiPCA - The Prescriptions in Primary Care Archive.

Appendix table 11. Main characteristics of the eligible studies: fatal and non-fatal self-harm.

| Author, year of publication | Study title                                                                            | Type of study             | Database(s) | Study period (years) | Outcome description                                                                                                                                                                                                                                                                                                                                                                                                                                                                                                                                                                                                                                                         | List of codes available | Validation of list of codes                                  | EHR-related eligibility criteria for the study // Follow up requirements                                            | Handling of outcomes occurring prior to exposure (applicable to self-harm only) | Notes                                                                                                                            |
|-----------------------------|----------------------------------------------------------------------------------------|---------------------------|-------------|----------------------|-----------------------------------------------------------------------------------------------------------------------------------------------------------------------------------------------------------------------------------------------------------------------------------------------------------------------------------------------------------------------------------------------------------------------------------------------------------------------------------------------------------------------------------------------------------------------------------------------------------------------------------------------------------------------------|-------------------------|--------------------------------------------------------------|---------------------------------------------------------------------------------------------------------------------|---------------------------------------------------------------------------------|----------------------------------------------------------------------------------------------------------------------------------|
| Andersohn, 2010 [91]        | Use of antiepileptic drugs in epilepsy and the risk of self-harm or suicidal behaviour | Nested case-control study | CPRD        | 1990-2005            | "Potential cases were identified using predefined medical codes of self-harm (i.e., without a clear suicidal intention [intentional self-harm]) or suicidal behaviour (i.e., with a clear suicidal intention [attempted suicide]). Patients who died were also considered as potential cases if suicidal thoughts were recorded within 4 weeks before death."                                                                                                                                                                                                                                                                                                               | Yes                     | Yes, record review                                           | At least one year of data with the GP practice                                                                      | Models adjusted for history of self-harm at baseline                            | In an additional analysis, the patients with codes for self-harm without explicitly mention to suicidal behaviour were excluded. |
| Arana, 2010 [92]            | Suicide-related events in patients treated with antiepileptic drugs                    | Cohort study              | THIN        | 1988-2008            | "Cases of suicide-related events were based on codes for suicide, attempted suicide, and intentional self-inflicted injuries plus suicide. A completed suicide was defined as a code for suicidality followed by a code for death in the following month and a final date of any administrative activity in the database or disenrollment within 6 months after the suicidality code. If the disenrollment date occurred more than 6 months after a suicidality code, we reviewed the patient's profile. Patients with a last medical or other health related code that was recorded within 1 month after the suicide date were also considered to have completed suicide." | No                      | Yes<br>GP questionnaire, record and death certificate review | Patients were eligible if they were enrolled with a clinical practice for at least 6 months during the study period | Patients with personal or family history of suicide attempt were excluded       | -                                                                                                                                |
| Garr, 2016 [93]             | The epidemiology of self-harm in a UK-wide primary care patient cohort, 2001-2013      | Descriptive cohort study  | CPRD        | 2001-2013            | "Read codes incorporating all cases across the spectrum from milder forms of non-suicidal behaviour through to near-fatal suicide attempts (...) We excluded codes that referred only to thoughts of self-harm or suicidal ideation and alcohol-related codes, unless intent to actively harm oneself was specified."                                                                                                                                                                                                                                                                                                                                                       | Yes                     | None stated                                                  | None stated                                                                                                         | None stated                                                                     | None stated                                                                                                                      |

1  
2

| 3<br>4<br>5<br>6<br>7                  | Author,<br>year of<br>publication | Study title                                                                                                                                                          | Type of study                | Database(s)       | Study<br>period<br>(years) | Outcome description                                                                                                                                                            | List of<br>codes<br>available                              | Validation<br>of list of<br>codes                                     | EHR-related<br>eligibility<br>criteria<br>for the study<br>//<br>Follow up<br>requirements                                                                          | Handling of<br>outcomes<br>occurring prior<br>to exposure<br>(applicable to<br>self-harm only)                    | Notes                                                                                                           |
|----------------------------------------|-----------------------------------|----------------------------------------------------------------------------------------------------------------------------------------------------------------------|------------------------------|-------------------|----------------------------|--------------------------------------------------------------------------------------------------------------------------------------------------------------------------------|------------------------------------------------------------|-----------------------------------------------------------------------|---------------------------------------------------------------------------------------------------------------------------------------------------------------------|-------------------------------------------------------------------------------------------------------------------|-----------------------------------------------------------------------------------------------------------------|
| 8<br>9<br>10                           | Carr, 2017<br>[94]                | Premature Death<br>Among Primary Care<br>Patients With a History<br>of Self-Harm                                                                                     | Cohort study                 | CPRD<br>ONS       | 2001-2013                  | Suicide, ascertained with ICD-10<br>codes in the ONS mortality data;<br>including open verdicts.                                                                               | Yes                                                        | Not<br>applicable                                                     | At least one year<br>of registration with<br>the practice prior<br>to the index date;                                                                               | Not applicable.                                                                                                   | -                                                                                                               |
| 11<br>12<br>13<br>14<br>15             | Coupland,<br>2011 [95]            | Antidepressant use and<br>risk of adverse<br>outcomes in older<br>people: Population<br>based cohort study                                                           | Cohort study                 | QResearch,<br>ONS | 1996-2007                  | Read codes for attempted suicide or<br>self-harm, not further specified                                                                                                        | No                                                         | None<br>stated                                                        | At least one year<br>of registration with<br>the practice prior<br>to the index date;                                                                               | None stated                                                                                                       | Suicide was also<br>an outcome, but<br>data for this<br>outcome was<br>not analysed<br>due to small<br>numbers. |
| 16<br>17<br>18<br>19<br>20<br>21<br>22 | Coupland,<br>2015 [96]            | Antidepressant use and<br>risk of suicide and<br>attempted suicide or<br>self-harm in people aged<br>20 to 64: cohort study<br>using a primary care<br>database      | Cohort study                 | QResearch,<br>ONS | 2000-2011                  | code for suicide or an open verdict<br>in their linked death certificate, or<br>patients who had a Read code for<br>attempted suicide or self-harm who<br>died within 30 days. | No<br><br>(refers to<br>codes used<br>in other<br>studies) | None<br>stated                                                        | At least one year<br>of registration with<br>the practice prior<br>to the index date;<br>//<br>Most analysis<br>restricted to the<br>first 5 years of<br>follow up. | Excluded<br>patients with a<br>previous<br>attempted<br>suicide or self-<br>harm event<br>recorded at<br>baseline | -                                                                                                               |
| 23<br>24<br>25<br>26<br>27             | Bardet, 2012<br>[97]              | Suicidal behavior and<br>severe neuropsychiatric<br>disorders following<br>glucocorticoid therapy in<br>primary care                                                 | Cohort study                 | THIN              | 1990-2008                  | Cases of suicide or suicide attempt                                                                                                                                            | No                                                         | Yes<br><br>Review of<br>death<br>certificates                         | ≥6 months of<br>registration with<br>the primary care<br>practice                                                                                                   | Hazards ratios<br>adjusted for past<br>history of<br>neuropsychiatric<br>disorders<br>(yes/no)                    | Outcome was<br>eligible if there<br>was no record of<br>the outcome in<br>the previous 6<br>months              |
| 28<br>29<br>30<br>31<br>32             | Donovan,<br>1996 [97]             | The use of the General<br>Practice Research<br>Database (GPRD) to<br>examine potential links<br>between antidepressant<br>medication and the<br>incidence of suicide | Cohort study                 | CPRD              | 1988-1993                  | Suicide, not further specified                                                                                                                                                 | No                                                         | None<br>stated                                                        | None stated                                                                                                                                                         | Prior suicidal<br>history<br>considered as a<br>risk factor for<br>suicide                                        | -                                                                                                               |
| 33<br>34<br>35<br>36<br>37<br>38       | Boyle, 2016<br>[98]               | Suicide risk in primary<br>care patients diagnosed<br>with a personality<br>disorder: a nested case<br>control study                                                 | Nested case<br>control study | CPRD, ONS         | 2002-2011                  | Suicides and open verdicts<br>ascertained via linkage to ONS<br>mortality data                                                                                                 | Yes<br><br>(ICD-10<br>codes)                               | Not<br>applicable<br><br>(Data<br>linked to<br>the gold-<br>standard) | At least one year<br>of up to standard<br>CPRD data                                                                                                                 | Not applicable                                                                                                    | -                                                                                                               |

39  
40  
41  
42  
43  
44  
45  
46



1

2

| 3 Author,<br>4 year of<br>5 publication | 6 Study title                                                                                                                                                             | 7 Type of study | 8 Database(s) | 9 Study<br>period<br>(years) | 10 Outcome description                                                                                                                                                                                                                                                                                                                                                                                                                                                                                                                                                                                                                                                                                                                                                                                                                                                                                                                                                                                                                       | 11 List of<br>codes<br>available | 12 Validation<br>of list of<br>codes | 13 EHR-related<br>eligibility criteria<br>for the study<br>//<br>14 Follow up<br>requirements | 15 Handling of<br>outcomes<br>occurring prior<br>to exposure<br>(applicable to<br>self-harm only)                                                 | 16 Notes |
|-----------------------------------------|---------------------------------------------------------------------------------------------------------------------------------------------------------------------------|-----------------|---------------|------------------------------|----------------------------------------------------------------------------------------------------------------------------------------------------------------------------------------------------------------------------------------------------------------------------------------------------------------------------------------------------------------------------------------------------------------------------------------------------------------------------------------------------------------------------------------------------------------------------------------------------------------------------------------------------------------------------------------------------------------------------------------------------------------------------------------------------------------------------------------------------------------------------------------------------------------------------------------------------------------------------------------------------------------------------------------------|----------------------------------|--------------------------------------|-----------------------------------------------------------------------------------------------|---------------------------------------------------------------------------------------------------------------------------------------------------|----------|
| 17 Gao, 2013<br>18 [99]                 | 19 Association between<br>20 body mass index and<br>21 suicide, and suicide<br>22 attempt among British<br>23 adults: The health<br>24 improvement network<br>25 database | 26 Cohort study | 27 THIN       | 28 2000-2007                 | 29 Suicide: "defined in two ways (...): 1)<br>30 patients with a Read code of suicide<br>31 attempt confirmed by death within 3<br>32 months or 2) patients who did not<br>33 have a Read code of suicide<br>34 attempt, but whose cause of death<br>35 might be suicide. To identify patients<br>36 using the second approach, we first<br>37 searched for all deaths (...) the<br>38 cause of death was reviewed. In<br>39 addition, free text records were<br>40 searched for potential suicide as<br>41 cause of death, including suicide,<br>42 deliberate drug overdose or self-<br>43 harm, self-inflicted injuries,<br>44 poisoning, asphyxiation, trauma, and<br>45 acute or multiple organ failure.<br>46 Death certificates for these patients<br>47 were requested for the final verdict<br>48 of the cause of death.<br><br>49 Suicide attempt: "identified using the<br>50 Read codes for suicide and then by<br>51 confirming that the patient was still<br>52 alive for at least 3 months from the<br>53 time of the event." | 54 No                            | 55 None<br>stated                    | 56 None stated                                                                                | 57 None stated                                                                                                                                    | 58 -     |
| 59 Gunnell,<br>60 2009 [19]             | 61 Varenicline and suicidal<br>62 behaviour: a cohort<br>63 study based on data<br>64 from the General<br>65 Practice Research<br>66 Database                             | 67 Cohort study | 68 CPRD       | 69 2006-2008                 | 70 OXMIS and Read terms for fatal and<br>71 non-fatal self-harm.                                                                                                                                                                                                                                                                                                                                                                                                                                                                                                                                                                                                                                                                                                                                                                                                                                                                                                                                                                             | 72 No                            | 73 Yes<br><br>74 Record<br>75 review | 76 At least 1 years of<br>77 CPRD records<br>78 before index date;                            | 79 Considered the<br>80 potential<br>81 confounding<br>82 effect of<br>83 previous self-<br>84 harm or suicidal<br>85 thoughts in<br>86 analysis. | 87 -     |

36

37

38

39

40

41

42

43

44

45

46

1  
2  
3  
4  
5  
6  
7  
8  
9  
10  
11  
12  
13  
14  
15  
16  
17  
18  
19  
20  
21  
22  
23  
24  
25  
26  
27  
28  
29  
30  
31  
32  
33  
34  
35  
36  
37  
38  
39  
40  
41  
42  
43  
44  
45  
46

| Author, year of publication | Study title                                                                                                                                                          | Type of study    | Database(s) | Study period (years) | Outcome description                                                                                                                                                                                                                                                                                                                                                                                                                                        | List of codes available | Validation of list of codes                        | EHR-related eligibility criteria for the study // Follow up requirements    | Handling of outcomes occurring prior to exposure (applicable to self-harm only)                                                         | Notes |
|-----------------------------|----------------------------------------------------------------------------------------------------------------------------------------------------------------------|------------------|-------------|----------------------|------------------------------------------------------------------------------------------------------------------------------------------------------------------------------------------------------------------------------------------------------------------------------------------------------------------------------------------------------------------------------------------------------------------------------------------------------------|-------------------------|----------------------------------------------------|-----------------------------------------------------------------------------|-----------------------------------------------------------------------------------------------------------------------------------------|-------|
| Hall, 2009 [100]            | Validation of death and suicide recording on the THIN UK primary care database                                                                                       | Validation study | THIN        | 2002-2004            | “Coded and free text records were searched to identify any entry for suicide or a medical cause of death which might indicate suicide, including trauma, poisoning, overdose, asphyxiation, acute or multiple organ failure or a suggestion that death was intentional. An electronic record of suicide was accepted.”                                                                                                                                     | Yes                     | Yes<br><br>(Validation study, record review)       | None stated                                                                 | Not applicable (validation study)                                                                                                       | -     |
| Ragberg, 2016 [21]          | Incidence rates of suicidal behaviors and treated depression in patients with and without psoriatic arthritis using the Clinical Practice Research Datalink          | Cohort study     | CPRD        | 1998-2012            | Suicidal behaviours, defined as: “diagnosis of suicidal ideation, suicide attempt, and/or suicide recorded after the cohort entry date. (...) If a patient had a code for suicide, but had not died, the event was classified as a suicide attempt. Suicidal ideation, attempts, and suicide were considered separately; thus a patient may have been included in more than one analysis.                                                                  | No                      | Yes, record review                                 | At least one year of registration with the practice prior to the index date | Patients with suicidal behaviors were included “because patients could recover from suicidal behaviors with treatment or consultation.” | -     |
| Hayes, 2016 [101]           | Self-harm, Unintentional Injury, and Suicide in Bipolar Disorder During Maintenance Mood Stabilizer Treatment: A UK Population-Based Electronic Health Records Study | Cohort study     | THIN        | 1995-2013            | “emergency department or primary care attendance for self-harm during the period of drug exposure and the 3 months afterward. This outcome included Read codes for intentional poisoning, intentional self injurious behavior, and self-harm acts of uncertain intent. (...) Secondary outcomes were unintentional injury (eg, falls or motor vehicle crashes) seen in primary or secondary care and a record of the patient’s suicide during this period” | No                      | Refers to previous validation of the list of codes | None stated                                                                 | Not applicable (the outcome was diagnoses during the exposure period)                                                                   | -     |

1  
2  
3  
4  
5  
6  
7  
8  
9  
10  
11  
12  
13  
14  
15  
16  
17  
18  
19  
20  
21  
22  
23  
24  
25  
26  
27  
28  
29  
30  
31  
32  
33  
34  
35  
36  
37  
38  
39  
40  
41  
42  
43  
44  
45  
46

| Author,<br>year of<br>publication | Study title                                                                           | Type of study | Database(s) | Study<br>period<br>(years) | Outcome description                                                                                                                                    | List of<br>codes<br>available | Validation<br>of list of<br>codes | EHR-related<br>eligibility<br>criteria<br>for the study<br>//<br>Follow up<br>requirements                                                                                                                                                                      | Handling of<br>outcomes<br>occurring prior<br>to exposure<br>(applicable to<br>self-harm only) | Notes |
|-----------------------------------|---------------------------------------------------------------------------------------|---------------|-------------|----------------------------|--------------------------------------------------------------------------------------------------------------------------------------------------------|-------------------------------|-----------------------------------|-----------------------------------------------------------------------------------------------------------------------------------------------------------------------------------------------------------------------------------------------------------------|------------------------------------------------------------------------------------------------|-------|
| Hesdorffer,<br>2012 [4]           | Epilepsy, suicidality, and<br>psychiatric disorders: a<br>bidirectional association   | Cohort study  | CPRD        | 1990-2008                  | Read codes for suicidality including<br>codes for attempted suicide and<br>completed suicide.                                                          | No                            | None<br>stated                    | At least 3 years of<br>data before the<br>index date, and at<br>least 1 code for a<br>medical or drug<br>code in the 6<br>months before the<br>index<br>//<br>At least 1 day of<br>data after index<br>date; follow up<br>duration: 3 years<br>after index date | Excluded<br>subjects with a<br>record of the<br>outcome before<br>the study date.              | -     |
| Hesdorffer,<br>2016 [102]         | Occurrence and<br>Recurrence of<br>Attempted Suicide<br>Among People With<br>Epilepsy | Cohort study  | CPRD        | 1988-2013                  | Diagnoses of attempted suicide<br>identified with Read codes, not<br>further specified.<br><br>Suicide attempts divided into<br>incident or recurrent. | No                            | None<br>stated                    | At least 6 month of<br>complete records<br>before the index<br>date and ≥1<br>medical or drug<br>codes for a<br>condition other<br>than epilepsy in<br>the 6 months<br>before the index<br>date.<br>//<br>At least 1 day of<br>data post index<br>date          | None stated                                                                                    | -     |

1  
2

| 3Author,<br>4year of<br>5publication | 6Title                                                                                            | 7Study title              | Type of study | Database(s) | Study period (years)                                                                                                                                                                                                                                                                                                                                                                                                                                                                                 | Outcome description | List of codes available                                  | Validation of list of codes                                                               | EHR-related eligibility criteria for the study // Follow up requirements | Handling of outcomes occurring prior to exposure (applicable to self-harm only) | Notes |
|--------------------------------------|---------------------------------------------------------------------------------------------------|---------------------------|---------------|-------------|------------------------------------------------------------------------------------------------------------------------------------------------------------------------------------------------------------------------------------------------------------------------------------------------------------------------------------------------------------------------------------------------------------------------------------------------------------------------------------------------------|---------------------|----------------------------------------------------------|-------------------------------------------------------------------------------------------|--------------------------------------------------------------------------|---------------------------------------------------------------------------------|-------|
| 8Haste, 1998<br>9[103]               | Potential for suicide prevention in primary care? An analysis of factors associated with suicide. | Matched cohort study      | CPRD          | 1991-1993   | Suicide: "were identified from the database in two ways: 1. Patients with a record of suicide in the notes; and 2. Patients who did not have a record of suicide, but whose record of cause of death on the database suggested that suicide might be possible. These causes included death from carbon monoxide poisoning (excluding accidental poisoning), hanging, suicidal or accidental overdose, and reference to self-inflicted injury. (...) Cases where the verdict was open were included." | No                  | Yes<br><br>GP confirmation, review of death certificates | None stated                                                                               | Not applicable (cases of completed suicide only)                         | -                                                                               |       |
| 19Jick, 1995<br>20[104]              | Antidepressants and suicide                                                                       | Cohort study              | CPRD          | 1988-1993   | "Cases of suicide were identified from the computer record from among all the study subjects who died. When the cause of death was recorded as suicide or was considered to be uncertain, we obtained further information from the general practitioner and the death certificate to determine the final diagnosis and means of committing suicide."                                                                                                                                                 | No                  | Yes, GP questionnaire                                    | At least 6 month of registration with the practice prior to the index date                | Not applicable (cases of completed suicide only)                         | -                                                                               |       |
| 27Jick, 1998<br>28[105]              | A study of the relation of exposure to quinolones and suicidal behaviour                          | Nested case control study | CPRD          | 1991-1995   | Three case groups:<br>1) committed suicide;<br>2) had a diagnosis of attempted suicide;<br>3) had a diagnosis of suicidal ideation.<br><br>"If the subject had more than one case diagnosis during the study period, only the first such diagnosis was considered."                                                                                                                                                                                                                                  | Yes                 | None stated                                              | > 18 months of information on drugs prescribed and diagnoses recorded prior to the index. | None stated                                                              | -                                                                               |       |

37  
38  
39  
40  
41  
42  
43  
44  
45  
46

1  
2

| 3<br>4<br>5<br>6<br>7                  | Author,<br>year of<br>publication | Study title                                                                                                  | Type of study        | Database(s) | Study<br>period<br>(years) | Outcome description                                                                                                                                                                                                         | List of<br>codes<br>available                                    | Validation<br>of list of<br>codes | EHR-related<br>eligibility criteria<br>for the study<br>//<br>Follow up<br>requirements                                    | Handling of<br>outcomes<br>occurring prior<br>to exposure<br>(applicable to<br>self-harm only)                                                | Notes |
|----------------------------------------|-----------------------------------|--------------------------------------------------------------------------------------------------------------|----------------------|-------------|----------------------------|-----------------------------------------------------------------------------------------------------------------------------------------------------------------------------------------------------------------------------|------------------------------------------------------------------|-----------------------------------|----------------------------------------------------------------------------------------------------------------------------|-----------------------------------------------------------------------------------------------------------------------------------------------|-------|
| 8<br>9<br>10<br>11<br>12<br>13<br>14   | Jick, 2000<br>[106]               | Isotretinoin use and risk of depression, psychotic symptoms, suicide, and attempted suicide                  | Cohort study         | CPRD        | ?                          | Suicide and inpatient or outpatient code for attempted suicide                                                                                                                                                              | Yes                                                              | None stated                       | Between 5 years and 6 months of clinical records before the index date<br>//<br>At least 1 year of records post index date | Controlled for history of attempted suicide                                                                                                   | -     |
| 15<br>16<br>17<br>18<br>19<br>20<br>21 | Jick, 2004<br>[107]               | Antidepressants and risk of suicidal behaviours                                                              | Cohort study         | CPRD        | 1993-1999                  | Nonfatal suicidal behaviour: "Cases were those who (1) had a first-time recorded diagnosis of nonfatal suicidal ideation (...) or attempted suicide"<br><br>Suicide: patients who committed suicide, not further specified. | Yes                                                              | None stated                       | At least 2 years of registration with the practice prior to the index date                                                 | None stated                                                                                                                                   | -     |
| 22<br>23<br>24                         | Jick, 2009<br>[108]               | Rate of suicide in patients taking montelukast                                                               | Cohort study         | CPRD        | 1998-2007                  | 'computer recorded diagnosis of suicide'                                                                                                                                                                                    | No                                                               | None stated                       | None stated                                                                                                                | None stated                                                                                                                                   |       |
| 25<br>26<br>27<br>28<br>29<br>30<br>31 | Kurd, 2010<br>[106]               | The risk of depression, anxiety, and suicidality in patients with psoriasis: A population-based cohort study | Matched cohort study | CPRD        | 1987-2002                  | 'Suicidality was defined as diagnosis of suicidal ideation, suicide attempt, or suicide', defined by diagnostic Read or OXMIS codes.                                                                                        | No<br><br>Refers to diagnostic codes used in other publications. | None stated                       | None stated                                                                                                                | In sensitivity analysis, the patients with a diagnosis of the outcome measured prior to or within six months of the index date were excluded. | -     |
| 32<br>33<br>34<br>35<br>36             | Kotz, 2015<br>[108]               | Cardiovascular and neuropsychiatric risks of varenicline: a retrospective cohort study                       | Cohort study         | QResearch   | 2007-2012                  | Fatal and non-fatal self-harm, not further specified                                                                                                                                                                        | None stated                                                      | None stated                       | Registered for >12 months before data extraction<br>//<br>Follow up duration 6 months                                      | History of neuropsychiatric events considered as confounders                                                                                  | -     |

37  
38  
39  
40  
41  
42  
43  
44  
45  
46

1  
2

| 3 Author,<br>4 year of<br>5 publication | 6 Title                                                                                                                          | 7 Study title             | Type of study                   | Database(s) | Study period (years)                                                                                                                                                              | Outcome description                 | List of codes available                                                    | Validation of list of codes                                                                                                                                                                | EHR-related eligibility criteria for the study // Follow up requirements | Handling of outcomes occurring prior to exposure (applicable to self-harm only)                              | Notes |
|-----------------------------------------|----------------------------------------------------------------------------------------------------------------------------------|---------------------------|---------------------------------|-------------|-----------------------------------------------------------------------------------------------------------------------------------------------------------------------------------|-------------------------------------|----------------------------------------------------------------------------|--------------------------------------------------------------------------------------------------------------------------------------------------------------------------------------------|--------------------------------------------------------------------------|--------------------------------------------------------------------------------------------------------------|-------|
| 8 Kotz, 2017<br>9 [27]                  | Cardiovascular and neuropsychiatric risks of varenicline and bupropion in smokers with chronic obstructive pulmonary disease     | Cohort study              | QResearch                       | 2001-2012   | Fatal and non-fatal self-harm, not further specified                                                                                                                              | None stated                         | None stated                                                                | None stated // Follow up duration 6 months                                                                                                                                                 | History of neuropsychiatric events considered as confounders             | -                                                                                                            |       |
| 12 Calmohame<br>13, 2012<br>14 [109]    | Causes of death in patients with multiple sclerosis and matched referent subjects: A population-based cohort study               | Cohort study              | CPRD<br>HES<br>ONS<br>mortality | 2001-2008   | Death by accident or suicide ascertained in the ONS mortality database                                                                                                            | Yes (ICD-10 codes)                  | Not applicable (ONS mortality database, ICD-10 codes)                      | ≥1 year of data available before index date                                                                                                                                                | None stated                                                              | -                                                                                                            |       |
| 18 Martinez,<br>19 2005 [110]           | Antidepressant treatment and the risk of fatal and non-fatal self harm in first episode of depression: nested case-control study | Nested case control study | CPRD                            | 1995-2001   | Non-fatal self-harm (drug overdose, deliberate self-laceration, poisoning, and non-fatal suicide attempts using other methods)<br><br>Suicide, identified by OXMIS and Read codes | No<br><br>Obtained from the authors | Yes,<br><br>Review of the death certificates and free text entries         | ≥1 year of data available before index date                                                                                                                                                | Model adjusted for history of non-fatal self-harm                        | "People with an episode of non-fatal self harm were not censored in analyses with suicide as the end point." |       |
| 24 Meier, 2004<br>25 [9]                | The Risk of Severe Depression, Psychosis or Panic Attacks with Prophylactic Antimalarials                                        | Cohort study              | CPRD                            | 1990-1999   | Suicide defined by OXMIS and/or ICD-8 codes                                                                                                                                       | No                                  | Yes<br><br>'reviewed a list of all cases to determine inclusion/exclusion' | ≥1 year of data available before index date and "some GPRD activity (diagnoses or prescriptions) recorded after the index date"<br>// Patients were censored 18 months after exposure date | Not applicable (suicide as an outcome only)                              | -                                                                                                            |       |
| 34 Mines, 2005<br>35 [111]              | Prevalence of risk factors for suicide in patients prescribed venlafaxine, fluoxetine, and citalopram                            | Cohort study              | CPRD                            | 1995-2002   | Suicidal behaviour in the year prior to index date                                                                                                                                | Yes                                 | None stated                                                                | ≥1 year of data available                                                                                                                                                                  | None stated                                                              | -                                                                                                            |       |

43  
44  
45  
46

1

2

| 3Author,<br>4year of<br>5publication | 6Title                                                                                                                                          | 7Study title                | Type of study | Database(s) | Study period (years)                                                                                                                                                                                                                                                                               | Outcome description | List of codes available | Validation of list of codes | EHR-related eligibility criteria for the study // Follow up requirements                                             | Handling of outcomes occurring prior to exposure (applicable to self-harm only)                                         | Notes                                                                                                                                                                           |
|--------------------------------------|-------------------------------------------------------------------------------------------------------------------------------------------------|-----------------------------|---------------|-------------|----------------------------------------------------------------------------------------------------------------------------------------------------------------------------------------------------------------------------------------------------------------------------------------------------|---------------------|-------------------------|-----------------------------|----------------------------------------------------------------------------------------------------------------------|-------------------------------------------------------------------------------------------------------------------------|---------------------------------------------------------------------------------------------------------------------------------------------------------------------------------|
| 8Osborn,<br>92008 [112]              | 10Suicide and severe<br>11mental illnesses. Cohort<br>12study within the UK<br>13general practice<br>14research database                        | 15Matched cohort<br>16study | CPRD          | 1987-2002   | Suicide, not further specified                                                                                                                                                                                                                                                                     | No                  | None stated             | None stated                 | None stated                                                                                                          | None stated                                                                                                             |                                                                                                                                                                                 |
| 17Rubino,<br>182007 [113]            | 19Risk of suicide during<br>20treatment with<br>21venlafaxine, citalopram,<br>22fluoxetine, and<br>23dothiepin: retrospective<br>24cohort study | Cohort study                | CPRD          | 1995-2005   | 25Completed suicide: coding for death<br>26associated with mention of suicide in<br>27free text or by code for suicide in the<br>28medical record and a statement of<br>29death in the administrative record<br>30(30 days either way);<br>31<br>32First attempted suicide (non-fatal<br>33event). | Yes                 | Yes                     | Free text search            | At least one year of registration with the practice prior to the index date                                          | Suicide attempts considered as a confounder in the models                                                               | “excluded records that at the review of free text notes did not seem to represent attempted suicide - for example, unintentional overdose or self harm without suicidal intent” |
| 34Schneider,<br>352010 [37]          | 36COPD and the risk of<br>37depression                                                                                                          | Cohort study                | CPRD          | 1995-2005   | 38‘incident suicide or suicidal ideation’,<br>39not further specified                                                                                                                                                                                                                              | No                  | None stated             | None stated                 | 40Patients with less than 3 years of active recording history prior to the date of the COPD diagnosis were excluded; | 41Patients with previous history of depression, suicide, suicidal ideation, etc., prior to the index date were excluded | -                                                                                                                                                                               |

28

29

30

31

32

33

34

35

36

37

38

39

40

41

42

43

44

45

46

1  
2  
3  
4  
5  
6  
7  
8  
9  
10  
11  
12  
13  
14  
15  
16  
17  
18  
19  
20  
21  
22  
23  
24  
25  
26  
27  
28  
29  
30  
31  
32  
33  
34  
35  
36  
37  
38  
39  
40  
41  
42  
43  
44  
45  
46

| Author, year of publication | Study title                                                                                                                                                                                                               | Type of study             | Database(s)                      | Study period (years) | Outcome description                                                                                                                                                                                                                                                                                                                                                                                                                                                                                                                                                                                                                                                                                                                                                             | List of codes available                  | Validation of list of codes | EHR-related eligibility criteria for the study // Follow up requirements    | Handling of outcomes occurring prior to exposure (applicable to self-harm only)                                             | Notes |
|-----------------------------|---------------------------------------------------------------------------------------------------------------------------------------------------------------------------------------------------------------------------|---------------------------|----------------------------------|----------------------|---------------------------------------------------------------------------------------------------------------------------------------------------------------------------------------------------------------------------------------------------------------------------------------------------------------------------------------------------------------------------------------------------------------------------------------------------------------------------------------------------------------------------------------------------------------------------------------------------------------------------------------------------------------------------------------------------------------------------------------------------------------------------------|------------------------------------------|-----------------------------|-----------------------------------------------------------------------------|-----------------------------------------------------------------------------------------------------------------------------|-------|
| Schuerch, 2016 [114]        | Impact of varying outcomes and definitions of suicidality on the associations of antiepileptic drugs and suicidality: comparisons from UK Clinical Practice Research Datalink (CPRD) and Danish national registries (DNR) | Validation study          | CPRD<br>HES<br>ONS               | 1996-2009            | <p><u>Suicidal ideation/intent:</u><br/>“Recorded medical terms from the clinical and referral module, plus reasons for transfer out of the general practices to identify patients with one of these outcomes”</p> <p><u>Suicide attempt:</u><br/>“Recorded medical terms from the clinical and referral module, plus reasons for transfer out of the GP-practice to identify patients with one of these outcomes from CPRD.”</p> <p><u>Completed suicide:</u><br/>“Term of suicidal attempt or ideation occurring simultaneously with a recording of death (+/- 4 weeks), death recorded as reason for leaving the practice (registering out), and a final date of any administrative activity in the database of disenrollment within six months after suicidality code.”</p> | Yes                                      | Yes (validation study)      | At least 6 months of data before the index date //                          | Patients with history of suicide attempts, self-harm or suicidal ideation/intent in the 6 months before index were excluded | -     |
| Thomas, 2013 [40]           | Smoking cessation treatment and risk of depression, suicide, and self harm in the Clinical Practice Research Datalink: prospective cohort study                                                                           | Nested case-control study | CPRD, HES and ONS mortality data | 2006-2011            | Incidence fatal and non-fatal self-harm (as measured by death from suicide in the ONS mortality database) and hospital admission for self-harm (as recorded in the HES database). Includes open verdicts.                                                                                                                                                                                                                                                                                                                                                                                                                                                                                                                                                                       | Yes for ONS database; no for Read codes. | None stated                 | At least one year of registration with the practice prior to the index date | Previous self-harm considered as a potential confounder in analysis                                                         | -     |



1

2

| 3 Author,<br>4 year of<br>5 publication | 6 Study title                                                                                                           | 7 Type of study                 | 8 Database(s)                                                                                             | 9 Study<br>period<br>(years) | 10 Outcome description                                                                                                                                                                                                                                                                                                                                                                                                                                                                                                                                            | 11 List of<br>codes<br>available | 12 Validation<br>of list of<br>codes               | 13 EHR-related<br>eligibility criteria<br>for the study<br>//<br>14 Follow up<br>requirements                                                              | 15 Handling of<br>outcomes<br>occurring prior<br>to exposure<br>(applicable to<br>self-harm only) | 16 Notes                                                                                                         |
|-----------------------------------------|-------------------------------------------------------------------------------------------------------------------------|---------------------------------|-----------------------------------------------------------------------------------------------------------|------------------------------|-------------------------------------------------------------------------------------------------------------------------------------------------------------------------------------------------------------------------------------------------------------------------------------------------------------------------------------------------------------------------------------------------------------------------------------------------------------------------------------------------------------------------------------------------------------------|----------------------------------|----------------------------------------------------|------------------------------------------------------------------------------------------------------------------------------------------------------------|---------------------------------------------------------------------------------------------------|------------------------------------------------------------------------------------------------------------------|
| 8 Thomas,<br>9 2013 [115]               | 10 Validation of suicide and<br>11 self-harm records in the<br>12 Clinical Practice<br>13 Research Datalink             | 14 Validation study             | 15 CPRD, HES,<br>16 ONS<br>17 mortality<br>18 data, and<br>19 Multicentre<br>20 study of self-<br>21 harm | 22 1998-2010                 | 23 "Cases of suicide and self-harm (the<br>24 'events') were identified by<br>25 extracting all records with Read<br>26 codes for suicide, attempted suicide<br>27 and self-harm (...). Given that<br>28 suicide-related Read codes may<br>29 refer to both fatal and nonfatal<br>30 suicide attempts, completed suicides<br>31 within the CPRD were identified<br>32 using the conventional CPRD<br>33 approach of linking patient deaths to<br>34 Read codes for suicide that were<br>35 recorded within 95 days of the<br>36 CPRD derived death dates"         | 37 Yes                           | 38 Yes<br><br>(Validation<br>study)                | 39 Registered with a<br>40 practice<br>41 contributing with<br>42 up to standard<br>43 data, and having<br>44 acceptable<br>45 records for<br>46 research. | 47 Not applicable<br>(descriptive<br>study on the<br>incidence of self-<br>harm)                  | -                                                                                                                |
| 48 Tyrrell, 2016<br>49 [116]            | 50 Changes in poisonings<br>among adolescents in<br>the UK between 1992<br>and 2012: a population<br>based cohort study | 51 Cohort study                 | 52 THIN                                                                                                   | 53 1992-2012                 | 54 "poisonings [categorised] as<br>55 intentional, unintentional, unknown<br>56 intent or alcohol related. Where<br>57 Read codes explicitly described the<br>58 intent using the words 'deliberate' or<br>59 'intentional' (intentional); 'accidental'<br>60 (unintentional); and 'unknown' or<br>61 'unspecified' (unknown) then they<br>62 were classified as such. The words<br>63 'suicide', 'self-inflicted', 'self-<br>64 poisoning' or 'overdose' were also<br>65 used to categorise a poisoning as<br>66 intentional, unless otherwise<br>67 specified." | 68 No                            | 69 None<br>stated                                  | 70 None stated                                                                                                                                             | 71 First poisoning<br>within the<br>observation<br>period                                         | 72 Multiple events<br>occurring in the<br>same individual<br>within a month<br>were counted as<br>one event only |
| 73 Webb, 2012<br>74 [117]               | 75 Risk of self-harm in<br>physically ill patients in<br>UK primary care                                                | 76 Nested case<br>control study | 77 CPRD                                                                                                   | 78 2001-2008                 | 79 Suicidal ideation, defined by Read<br>coding descriptions that included the<br>terms 'suicide and self-inflicted,'<br>'suicide and self-harm,' 'para-<br>suicide' or 'attempted suicide.'<br>Cases that died following the code<br>were excluded.                                                                                                                                                                                                                                                                                                              | 80 No                            | 81 None<br>stated                                  | 82 At least two years<br>of up to standard<br>CPRD data                                                                                                    | 83 None stated                                                                                    | -                                                                                                                |
| 84 Webb, 2012<br>85 [118]               | 86 Suicide risk in primary<br>care patients with major<br>physical diseases: A<br>case-control study                    | 87 Nested case<br>control study | 88 CPRD and<br>ONS<br>mortality<br>data                                                                   | 89 2001-2008                 | 90 Suicides as mentioned in the death<br>certificate, and open verdicts.                                                                                                                                                                                                                                                                                                                                                                                                                                                                                          | 91 Yes                           | 92 Not<br>applicable<br>(ONS<br>mortality<br>data) | 93 At least two years<br>of up to standard<br>CPRD data                                                                                                    | 94 Not applicable<br>(study of suicide<br>only)                                                   | -                                                                                                                |

39

40

41

42

43

44

45

46

1  
2

| 3 Author,<br>4 year of<br>5 publication | 6 Study title                                                                                                                                                                                                     | 7 Type of study                     | 8 Database(s)                                    | 9 Study<br>period<br>(years) | 10 Outcome description                                                                                                                                                                                                                                                                                                      | 11 List of<br>codes<br>available                                                                  | 12 Validation<br>of list of<br>codes                                                                                  | 13 EHR-related<br>eligibility criteria<br>for the study<br>//<br>14 Follow up<br>requirements             | 15 Handling of<br>outcomes<br>occurring prior<br>to exposure<br>(applicable to<br>self-harm only) | 16 Notes |
|-----------------------------------------|-------------------------------------------------------------------------------------------------------------------------------------------------------------------------------------------------------------------|-------------------------------------|--------------------------------------------------|------------------------------|-----------------------------------------------------------------------------------------------------------------------------------------------------------------------------------------------------------------------------------------------------------------------------------------------------------------------------|---------------------------------------------------------------------------------------------------|-----------------------------------------------------------------------------------------------------------------------|-----------------------------------------------------------------------------------------------------------|---------------------------------------------------------------------------------------------------|----------|
| 8 Wijaars,<br>9 2013 [119]              | 10 Suicide-related events in<br>11 young people following<br>12 prescription of SSRIs<br>13 and other<br>14 antidepressants: A self-<br>15 controlled case series<br>16 analysis                                  | 17 Nested case<br>18 control study  | 19 THIN                                          | 20 1995-2009                 | 21 Suicide attempts, suicidal ideation<br>22 and completed suicide.<br><br>23 Completed suicides: "Read codes<br>24 that were confirmed by a date of<br>25 death within 2 weeks of the suicide<br>26 event date. We searched a cause of<br>27 death, if available."<br>28 Excluded cases classified as open<br>29 verdicts. | 30 No<br><br>31 Refers to a<br>32 previous list,<br>33 that was<br>34 updated for<br>35 the study | 36 Yes<br><br>37 Record<br>38 review                                                                                  | 39 At least 6 months<br>40 of up to standard<br>41 CPRD data                                              | 42 Accounted for in<br>43 analysis                                                                | 44 -     |
| 16 Windfuhr,<br>17 2016 [120]           | 18 Suicide risk linked with<br>19 clinical consultation<br>20 frequency, psychiatric<br>21 diagnoses and<br>22 psychotropic medication<br>23 prescribing in a national<br>24 study of primary-care<br>25 patients | 26 Nested case-<br>27 control study | 28 CPRD and<br>29 ONS<br>30 mortality<br>31 data | 32 2002-2011                 | 33 International Classification<br>34 of Disease version 10 (ICD-10)<br>35 codes X60-84, Y10-34<br>36 (excluding Y33.9), Y87.0, Y87.2<br><br>37 Includes open verdicts                                                                                                                                                      | 38 Yes                                                                                            | 39 Not<br>40 applicable<br>41 (ONS<br>42 mortality<br>43 data)                                                        | 44 ≥1 year of data<br>45 available after up<br>46 to standard data                                        | None stated                                                                                       | -        |
| 22 Yang, 2003<br>23 [44]                | 24 Lipid-lowering drugs and<br>25 the risk of depression<br>26 and suicidal behaviour                                                                                                                             | 27 Matched cohort<br>28 study       | 29 CPRD                                          | 30 1991<br>31 onwards        | 32 Suicidal behaviour, ideation suicidal,<br>33 suicidal plan, suicidal thoughts,<br>34 attempted suicide, threat suicide,<br>35 suicidal drug overdose, drug<br>36 overdose, para suicide and suicide.                                                                                                                     | 37 Yes                                                                                            | 38 No<br><br>39 (refers to<br>40 previous<br>41 studies<br>42 assessing<br>43 suitability<br>44 of the<br>45 records) | 46 Patients with<br>47 history of suicidal<br>48 behaviour prior to<br>49 study start were<br>50 excluded | None stated                                                                                       | -        |

29 CPRD – Clinical Practice Research Datalink; THIN – The Health Improvement Network; PCCIU – Primary Care Clinical Informatics Unit; SSRI - selective serotonin re-uptake  
30 inhibitors; GP – General practice; MAOIs - monoamine oxidase inhibitors; CiPCA - Consultations in primary care archive; PiPCA - Prescriptions in primary care archive.

43  
44  
45  
46

## References

1. Bouras G, SR Markar, EM Burns, HA Mackenzie, et al. Linked Hospital and Primary Care Database Analysis of the Incidence and Impact of Psychiatric Morbidity Following Gastrointestinal Cancer Surgery in England. *Ann Surg* 2016;264:93-9.
2. Fardet L, I Petersen, and I Nazareth. Suicidal behavior and severe neuropsychiatric disorders following glucocorticoid therapy in primary care. *Am J Psychiatry* 2012;169:491-7.
3. Granerod J, NW Davies, PP Ramanuj, A Easton, et al. Increased rates of sequelae post-encephalitis in individuals attending primary care practices in the United Kingdom: a population-based retrospective cohort study. *J Neurol* 2017;264:407-415.
4. Hesdorffer DC, L Ishihara, L Mynepalli, DJ Webb, et al. Epilepsy, suicidality, and psychiatric disorders: a bidirectional association. *Ann Neurol* 2012;72:184-91.
5. Khan NF, AM Ward, E Watson, and PW Rose. Consulting and prescribing behaviour for anxiety and depression in long-term survivors of cancer in the UK. *Eur J Cancer* 2010;46:3339-44.
6. Kurd SK, AB Troxel, P Crits-Christoph, and JM Gelfand. The risk of depression, anxiety, and suicidality in patients with psoriasis: a population-based cohort study. *Arch Dermatol* 2010;146:891-5.
7. Lurie I, YX Yang, K Haynes, R Mamtani, et al. Antibiotic exposure and the risk for depression, anxiety, or psychosis: a nested case-control study. *J Clin Psychiatry* 2015;76:1522-8.
8. Martin-Merino E, A Ruigomez, MA Wallander, S Johansson, et al. Prevalence, incidence, morbidity and treatment patterns in a cohort of patients diagnosed with anxiety in UK primary care. *Fam Pract* 2010;27:9-16.
9. Meier CR, K Wilcock, and SS Jick. The risk of severe depression, psychosis or panic attacks with prophylactic antimalarials. *Drug Saf* 2004;27:203-13.
10. Schneider C, M Adamcova, SS Jick, P Schlagenhaut, et al. Antimalarial chemoprophylaxis and the risk of neuropsychiatric disorders. *Travel Med Infect Dis* 2013;11:71-80.
11. Sheehan R, A Hassiotis, K Walters, D Osborn, et al. Mental illness, challenging behaviour, and psychotropic drug prescribing in people with intellectual disability: UK population based cohort study. *BMJ* 2015;351:h4326.
12. Walters K, G Rait, M Griffin, M Buszewicz, et al. Recent trends in the incidence of anxiety diagnoses and symptoms in primary care. *PLoS One* 2012;7:e41670.
13. Becker C, GP Brobert, S Johansson, SS Jick, et al. Risk of incident depression in patients with Parkinson disease in the UK. *Eur J Neurol* 2011;18:448-53.
14. Booth H, O Khan, AT Prevost, M Reddy, et al. Impact of bariatric surgery on clinical depression. Interrupted time series study with matched controls. *J Affect Disord* 2015;174:644-9.
15. Bornand D, S Toovey, SS Jick, and CR Meier. The risk of new onset depression in association with influenza--A population-based observational study. *Brain Behav Immun* 2016;53:131-137.
16. Claxton AJ, Z Li, and J McKendrick. Selective serotonin reuptake inhibitor treatment in the UK: risk of relapse or recurrence of depression. *Br J Psychiatry* 2000;177:163-8.

17. Clifford GM and RD Farmer. Drug or symptom-induced depression in men treated with alpha 1-blockers for benign prostatic hyperplasia? A nested case-control study. *Pharmacoepidemiol Drug Saf* 2002;11:55-61.
18. Dave S, I Petersen, L Sherr, and I Nazareth. Incidence of maternal and paternal depression in primary care: a cohort study using a primary care database. *Arch Pediatr Adolesc Med* 2010;164:1038-44.
19. Gunnell D, D Irvine, L Wise, C Davies, et al. Varenicline and suicidal behaviour: a cohort study based on data from the General Practice Research Database. *BMJ* 2009;339:b3805.
20. Hagberg KW, HA Divan, JC Nickel, and SS Jick. Risk of Incident Antidepressant-Treated Depression Associated with Use of 5alpha-Reductase Inhibitors Compared with Use of alpha-Blockers in Men with Benign Prostatic Hyperplasia: A Population-Based Study Using the Clinical Practice Research Datalink. *Pharmacotherapy* 2017;37:517-527.
21. Hagberg KW, L Li, M Peng, K Shah, et al. Incidence rates of suicidal behaviors and treated depression in patients with and without psoriatic arthritis using the Clinical Practice Research Datalink. *Mod Rheumatol* 2016;26:774-9.
22. Harris T, SM Shah, IM Carey, S DeWilde, et al. Depression indicators in a national sample of older community and care home patients: applying the Quality and Outcomes Framework. *Br J Gen Pract* 2011;61:135-8.
23. Jacob L, T Rockel, and K Kostev. Depression Risk in Patients with Rheumatoid Arthritis in the United Kingdom. *Rheumatol Ther* 2017;4:195-200.
24. Jenkins-Jones S, L Parviainen, J Porter, M Withe, et al. Poor compliance and increased mortality, depression and healthcare costs in patients with congenital adrenal hyperplasia. *Eur J Endocrinol* 2018;178:309-320.
25. John A, AL Marchant, DL Fone, JI McGregor, et al. Recent trends in primary-care antidepressant prescribing to children and young people: an e-cohort study. *Psychol Med* 2016;46:3315-3327.
26. Kendrick T, B Stuart, C Newell, AW Geraghty, et al. Changes in rates of recorded depression in English primary care 2003-2013: Time trend analyses of effects of the economic recession, and the GP contract quality outcomes framework (QOF). *J Affect Disord* 2015;180:68-78.
27. Kotz D, W Viechtbauer, CR Simpson, OCP van Schayck, et al. Cardiovascular and neuropsychiatric risks of varenicline and bupropion in smokers with chronic obstructive pulmonary disease. *Thorax* 2017;72:905-911.
28. Kotz D, W Viechtbauer, C Simpson, OC van Schayck, et al. Cardiovascular and neuropsychiatric risks of varenicline: a retrospective cohort study. *Lancet Respir Med* 2015;3:761-8.
29. Martin-Merino E, A Ruigomez, S Johansson, MA Wallander, et al. Study of a cohort of patients newly diagnosed with depression in general practice: prevalence, incidence, comorbidity, and treatment patterns. *Prim Care Companion J Clin Psychiatry* 2010;12:PCC 08m00764.
30. Millson D, M Frischer, P Croft, and PJ Goadsby. Are triptans with enhanced lipophilicity used for the acute treatment of migraine associated with an increased consulting rate for depressive illness? *Cephalalgia* 2000;20:732-7.

- 1
- 2
- 3
- 4 31. Milojevic A, B Armstrong, and P Wilkinson. Mental health impacts of flooding: a
- 5 controlled interrupted time series analysis of prescribing data in England. *J Epidemiol*
- 6 *Community Health* 2017;71:970-973.
- 7
- 8 32. Moore M, HM Yuen, N Dunn, MA Mullee, et al. Explaining the rise in antidepressant
- 9 prescribing: a descriptive study using the general practice research database. *BMJ*
- 10 2009;339:b3999.
- 11
- 12 33. Morgan E, CC Patterson, and CR Cardwell. General practice-recorded depression
- 13 and antidepressant use in young people with newly diagnosed Type 1 diabetes: a
- 14 cohort study using the Clinical Practice Research Datalink. *Diabet Med* 2014;31:241-
- 15 5.
- 16
- 17 34. Petersen I, JM Thomas, WT Hamilton, and PD White. Risk and predictors of fatigue
- 18 after infectious mononucleosis in a large primary-care cohort. *QJM* 2006;99:49-55.
- 19
- 20 35. Rait G, K Walters, M Griffin, M Buszewicz, et al. Recent trends in the incidence of
- 21 recorded depression in primary care. *Br J Psychiatry* 2009;195:520-4.
- 22
- 23 36. Shah SM, IM Carey, T Harris, S DeWilde, et al. The mental health and mortality
- 24 impact of death of a partner with dementia. *Int J Geriatr Psychiatry* 2016;31:929-37.
- 25
- 26 37. Schneider C, SS Jick, U Bothner, and CR Meier. COPD and the risk of depression.
- 27 *Chest* 2010;137:341-7.
- 28
- 29 38. Smeeth L, I Douglas, AJ Hall, R Hubbard, et al. Effect of statins on a wide range of
- 30 health outcomes: a cohort study validated by comparison with randomized trials. *Br J*
- 31 *Clin Pharmacol* 2009;67:99-109.
- 32
- 33 39. Smith DJ, H Court, G McLean, D Martin, et al. Depression and multimorbidity: a
- 34 cross-sectional study of 1,751,841 patients in primary care. *J Clin Psychiatry*
- 35 2014;75:1202-8; quiz 1208.
- 36
- 37 40. Thomas KH, RM Martin, NM Davies, C Metcalfe, et al. Smoking cessation treatment
- 38 and risk of depression, suicide, and self harm in the Clinical Practice Research
- 39 Datalink: prospective cohort study. *BMJ* 2013;347:f5704.
- 40
- 41 41. Tyrer F, RA Lawrenson, and RDT Farmer. A study of cardiovascular disease,
- 42 depression and antidepressants on a computerised general practice database.
- 43 *Human Psychopharmacology: clinical & experimental* 1999;14:233-237.
- 44
- 45 42. Vallerand IA, RT Lewinson, LM Parsons, MW Lowerison, et al. Risk of depression
- 46 among patients with acne in the U.K.: a population-based cohort study. *Br J Dermatol*
- 47 2018;178:e194-e195.
- 48
- 49 43. Walters P, P Schofield, L Howard, M Ashworth, et al. The relationship between
- 50 asthma and depression in primary care patients: a historical cohort and nested case
- 51 control study. *PLoS One* 2011;6:e20750.
- 52
- 53 44. Yang CC, SS Jick, and H Jick. Lipid-lowering drugs and the risk of depression and
- 54 suicidal behavior. *Arch Intern Med* 2003;163:1926-32.
- 55
- 56 45. John A, J McGregor, D Fone, F Dunstan, et al. Case-finding for common mental
- 57 disorders of anxiety and depression in primary care: an external validation of
- 58 routinely collected data. *BMC Med Inform Decis Mak* 2016;16:35.
- 59
- 60 46. Turner GM, M Calvert, MG Feltham, R Ryan, et al. Ongoing impairments following
- transient ischaemic attack: retrospective cohort study. *Eur J Neurol* 2016;23:1642-
- 1650.

- 1
  - 2
  - 3
  - 4
  - 5
  - 6
  - 7
  - 8
  - 9
  - 10
  - 11
  - 12
  - 13
  - 14
  - 15
  - 16
  - 17
  - 18
  - 19
  - 20
  - 21
  - 22
  - 23
  - 24
  - 25
  - 26
  - 27
  - 28
  - 29
  - 30
  - 31
  - 32
  - 33
  - 34
  - 35
  - 36
  - 37
  - 38
  - 39
  - 40
  - 41
  - 42
  - 43
  - 44
  - 45
  - 46
  - 47
  - 48
  - 49
  - 50
  - 51
  - 52
  - 53
  - 54
  - 55
  - 56
  - 57
  - 58
  - 59
  - 60
47. Brown A, O Kirichek, A Balkwill, G Reeves, et al. Comparison of dementia recorded in routinely collected hospital admission data in England with dementia recorded in primary care. *Emerg Themes Epidemiol* 2016;13:11.
48. Davies NM, PG Kehoe, Y Ben-Shlomo, and RM Martin. Associations of anti-hypertensive treatments with Alzheimer's disease, vascular dementia, and other dementias. *J Alzheimers Dis* 2011;26:699-708.
49. Donegan K, N Fox, N Black, G Livingston, et al. Trends in diagnosis and treatment for people with dementia in the UK from 2005 to 2015: a longitudinal retrospective cohort study. *Lancet Public Health* 2017;2:e149-e156.
50. Dregan A, P Chowienczyk, and MC Gulliford. Are Inflammation and Related Therapy Associated with All-Cause Dementia in a Primary Care Population? *J Alzheimers Dis* 2015;46:1039-47.
51. Dregan A, P Chowienczyk, and D Armstrong. Patterns of anti-inflammatory drug use and risk of dementia: a matched case-control study. *Eur J Neurol* 2015;22:1421-8.
52. Dunn N, C Holmes, and M Mullee. Does lithium therapy protect against the onset of dementia? *Alzheimer Dis Assoc Disord* 2005;19:20-2.
53. Dunn N, M Mullee, VH Perry, and C Holmes. Association between dementia and infectious disease: evidence from a case-control study. *Alzheimer Dis Assoc Disord* 2005;19:91-4.
54. Emdin CA, PM Rothwell, G Salimi-Khorshidi, A Kiran, et al. Blood Pressure and Risk of Vascular Dementia: Evidence From a Primary Care Registry and a Cohort Study of Transient Ischemic Attack and Stroke. *Stroke* 2016;47:1429-35.
55. Goh KL, K Bhaskaran, C Minassian, SJ Evans, et al. Angiotensin receptor blockers and risk of dementia: cohort study in UK Clinical Practice Research Datalink. *Br J Clin Pharmacol* 2015;79:337-50.
56. Hippisley-Cox J and C Coupland. Unintended effects of statins in men and women in England and Wales: population based cohort study using the QResearch database. *BMJ* 2010;340:c2197.
57. Imfeld P, M Bodmer, SS Jick, and CR Meier. Metformin, other antidiabetic drugs, and risk of Alzheimer's disease: a population-based case-control study. *J Am Geriatr Soc* 2012;60:916-21.
58. Imfeld P, YB Brauchli Pernus, SS Jick, and CR Meier. Epidemiology, co-morbidities, and medication use of patients with Alzheimer's disease or vascular dementia in the UK. *J Alzheimers Dis* 2013;35:565-73.
59. Imfeld P, M Bodmer, SS Jick, and CR Meier. Benzodiazepine Use and Risk of Developing Alzheimer's Disease or Vascular Dementia: A Case-Control Analysis. *Drug Saf* 2015;38:909-19.
60. Jick H, GL Zornberg, SS Jick, S Seshadri, et al. Statins and the risk of dementia. *Lancet* 2000;356:1627-31.
61. Judge A, C Garriga, NK Arden, S Lovestone, et al. Protective effect of antirheumatic drugs on dementia in rheumatoid arthritis patients. *Alzheimers Dement (N Y)* 2017;3:612-621.
62. Khan NF, D Mant, L Carpenter, D Forman, et al. Long-term health outcomes in a British cohort of breast, colorectal and prostate cancer survivors: a database study. *Br J Cancer* 2011;105 Suppl 1:S29-37.

- 1
- 2
- 3 63. Khosrow-Khavar F, S Rej, H Yin, A Aprikian, et al. Androgen Deprivation Therapy
- 4 and the Risk of Dementia in Patients With Prostate Cancer. *J Clin Oncol*
- 5 2017;35:201-207.
- 6
- 7 64. Lu N, M Dubreuil, Y Zhang, T Neogi, et al. Gout and the risk of Alzheimer's disease:
- 8 a population-based, BMI-matched cohort study. *Ann Rheum Dis* 2016;75:547-51.
- 9
- 10 65. Mehta HB, V Mehta, and JS Goodwin. Association of Hypoglycemia With
- 11 Subsequent Dementia in Older Patients With Type 2 Diabetes Mellitus. *J Gerontol A*
- 12 *Biol Sci Med Sci* 2017;72:1110-1116.
- 13
- 14 66. Mehta HB, V Mehta, CL Tsai, H Chen, et al. Development and Validation of the
- 15 RxDx-Dementia Risk Index to Predict Dementia in Patients with Type 2 Diabetes and
- 16 Hypertension. *J Alzheimers Dis* 2016;49:423-32.
- 17
- 18 67. Perera G, L Pedersen, D Ansel, M Alexander, et al. Dementia prevalence and
- 19 incidence in a federation of European Electronic Health Record databases: The
- 20 European Medical Informatics Framework resource. *Alzheimers Dement*
- 21 2018;14:130-139.
- 22
- 23 68. Qizilbash N, J Gregson, ME Johnson, N Pearce, et al. BMI and risk of dementia in
- 24 two million people over two decades: a retrospective cohort study. *Lancet Diabetes*
- 25 *Endocrinol* 2015;3:431-436.
- 26
- 27 69. Seshadri S, GL Zornberg, LE Derby, MW Myers, et al. Postmenopausal estrogen
- 28 replacement therapy and the risk of Alzheimer disease. *Arch Neurol* 2001;58:435-40.
- 29
- 30 70. Strom BL, R Schinnar, J Karlawish, S Hennessy, et al. Statin Therapy and Risk of
- 31 Acute Memory Impairment. *JAMA Intern Med* 2015;175:1399-405.
- 32
- 33 71. Walters K, S Hardoon, I Petersen, S Iliffe, et al. Predicting dementia risk in primary
- 34 care: development and validation of the Dementia Risk Score using routinely
- 35 collected data. *BMC Med* 2016;14:6.
- 36
- 37 72. Donegan K, R Beau-Lejdstrom, B King, S Seabroke, et al. Bivalent human
- 38 papillomavirus vaccine and the risk of fatigue syndromes in girls in the UK. *Vaccine*
- 39 2013;31:4961-7.
- 40
- 41 73. Collin SM, IJ Bakken, I Nazareth, E Crawley, et al. Trends in the incidence of chronic
- 42 fatigue syndrome and fibromyalgia in the UK, 2001-2013: a Clinical Practice
- 43 Research Datalink study. *J R Soc Med* 2017;110:231-244.
- 44
- 45 74. Gallagher AM, JM Thomas, WT Hamilton, and PD White. Incidence of fatigue
- 46 symptoms and diagnoses presenting in UK primary care from 1990 to 2001. *J R Soc*
- 47 *Med* 2004;97:571-5.
- 48
- 49 75. Hamilton WT, AM Gallagher, JM Thomas, and PD White. Risk markers for both
- 50 chronic fatigue and irritable bowel syndromes: a prospective case-control study in
- 51 primary care. *Psychol Med* 2009;39:1913-21.
- 52
- 53 76. Becker C, GP Brobert, PM Almqvist, S Johansson, et al. Migraine incidence,
- 54 comorbidity and health resource utilization in the UK. *Cephalalgia* 2008;28:57-64.
- 55
- 56 77. Campbell P, M Shraim, KP Jordan, and KM Dunn. In sickness and in health: A cross-
- 57 sectional analysis of concordance for musculoskeletal pain in 13,507 couples. *Eur J*
- 58 *Pain* 2016;20:438-46.
- 59
- 60 78. Hall GC, D Carroll, D Parry, and HJ McQuay. Epidemiology and treatment of
- neuropathic pain: the UK primary care perspective. *Pain* 2006;122:156-62.

- 1
- 2
- 3 79. Hall GC, SV Morant, D Carroll, ZL Gabriel, et al. An observational descriptive study
- 4 of the epidemiology and treatment of neuropathic pain in a UK general population.
- 5 BMC Fam Pract 2013:14:28.
- 6
- 7 80. Mansfield KE, J Sim, P Croft, and KP Jordan. Identifying patients with chronic
- 8 widespread pain in primary care. Pain 2017:158:110-119.
- 9
- 10 81. Ruigomez A, LA Rodriguez, MA Wallander, S Johansson, et al. Chest pain in general
- 11 practice: incidence, comorbidity and mortality. Fam Pract 2006:23:167-74.
- 12
- 13 82. Wallander MA, S Johansson, A Ruigomez, and LA Garcia Rodriguez. Unspecified
- 14 abdominal pain in primary care: the role of gastrointestinal morbidity. Int J Clin Pract
- 15 2007:61:1663-70.
- 16
- 17 83. Zondervan KT, PL Yudkin, MP Vessey, MG Dawes, et al. Prevalence and incidence
- 18 of chronic pelvic pain in primary care: evidence from a national general practice
- 19 database. Br J Obstet Gynaecol 1999:106:1149-55.
- 20
- 21 84. Blumentals WA, RR Brown, and A Gomez-Caminero. Antihypertensive treatment and
- 22 erectile dysfunction in a cohort of type II diabetes patients. Int J Impot Res
- 23 2003:15:314-7.
- 24
- 25 85. Hagberg KW, HA Divan, R Persson, JC Nickel, et al. Risk of erectile dysfunction
- 26 associated with use of 5-alpha reductase inhibitors for benign prostatic hyperplasia or
- 27 alopecia: population based studies using the Clinical Practice Research Datalink.
- 28 BMJ 2016:354:i4823.
- 29
- 30 86. Morant S, G Bloomfield, V Vats, and C Chapple. Increased sexual dysfunction in
- 31 men with storage and voiding lower urinary tract symptoms. J Sex Med 2009:6:1103-
- 32 1110.
- 33
- 34 87. Schlesinger N, N Lu, and HK Choi. Gout and the Risk of Incident Erectile
- 35 Dysfunction: A Body Mass Index-matched Population-based Study. J Rheumatol
- 36 2018:45:1192-1197.
- 37
- 38 88. Abdul Sultan A, C Mallen, R Hayward, S Muller, et al. Gout and subsequent erectile
- 39 dysfunction: a population-based cohort study from England. Arthritis Res Ther
- 40 2017:19:123.
- 41
- 42 89. Roddy E, S Muller, R Hayward, and CD Mallen. The association of gout with sleep
- 43 disorders: a cross-sectional study in primary care. BMC Musculoskelet Disord
- 44 2013:14:119.
- 45
- 46 90. Wallander MA, S Johansson, A Ruigomez, LA Garcia Rodriguez, et al. Morbidity
- 47 associated with sleep disorders in primary care: a longitudinal cohort study. Prim
- 48 Care Companion J Clin Psychiatry 2007:9:338-45.
- 49
- 50 91. Andersohn F, R Schade, SN Willich, and E Garbe. Use of antiepileptic drugs in
- 51 epilepsy and the risk of self-harm or suicidal behavior. Neurology 2010:75:335-40.
- 52
- 53 92. Arana A, CE Wentworth, JL Ayuso-Mateos, and FM Arellano. Suicide-related events
- 54 in patients treated with antiepileptic drugs. N Engl J Med 2010:363:542-51.
- 55
- 56 93. Carr MJ, DM Ashcroft, E Kontopantelis, Y Awenat, et al. The epidemiology of self-
- 57 harm in a UK-wide primary care patient cohort, 2001-2013. BMC Psychiatry
- 58 2016:16:53.
- 59
- 60 94. Carr MJ, DM Ashcroft, E Kontopantelis, D While, et al. Premature Death Among
- Primary Care Patients With a History of Self-Harm. Ann Fam Med 2017:15:246-254.



- 1
- 2
- 3
- 4 95. Coupland C, P Dhiman, R Morriss, A Arthur, et al. Antidepressant use and risk of
- 5 adverse outcomes in older people: population based cohort study. *BMJ*
- 6 2011;343:d4551.
- 7
- 8 96. Coupland C, T Hill, R Morriss, A Arthur, et al. Antidepressant use and risk of suicide
- 9 and attempted suicide or self harm in people aged 20 to 64: cohort study using a
- 10 primary care database. *BMJ* 2015;350:h517.
- 11
- 12 97. Donovan S. The Use of the General Practice Research Database (Gprd) to Examine
- 13 Potential Links between Antidepressant Medication and the Incidence of Suicide.
- 14 *Therapeutic Innovation & Regulatory Science* 1996;30:785-792.
- 15
- 16 98. Doyle M, D While, PL Mok, K Windfuhr, et al. Suicide risk in primary care patients
- 17 diagnosed with a personality disorder: a nested case control study. *BMC Fam Pract*
- 18 2016;17:106.
- 19
- 20 99. Gao S, J Juhaeri, S Reshef, and WS Dai. Association between body mass index and
- 21 suicide, and suicide attempt among British adults: the health improvement network
- 22 database. *Obesity (Silver Spring)* 2013;21:E334-42.
- 23
- 24 100. Hall GC. Validation of death and suicide recording on the THIN UK primary care
- 25 database. *Pharmacoepidemiol Drug Saf* 2009;18:120-31.
- 26
- 27 101. Hayes JF, A Pitman, L Marston, K Walters, et al. Self-harm, Unintentional Injury, and
- 28 Suicide in Bipolar Disorder During Maintenance Mood Stabilizer Treatment: A UK
- 29 Population-Based Electronic Health Records Study. *JAMA Psychiatry* 2016;73:630-7.
- 30
- 31 102. Hesdorffer DC, L Ishihara, DJ Webb, L Mynepalli, et al. Occurrence and Recurrence
- 32 of Attempted Suicide Among People With Epilepsy. *JAMA Psychiatry* 2016;73:80-6.
- 33
- 34 103. Haste F, J Charlton, and R Jenkins. Potential for suicide prevention in primary care?
- 35 An analysis of factors associated with suicide. *Br J Gen Pract* 1998;48:1759-63.
- 36
- 37 104. Jick SS, AD Dean, and H Jick. Antidepressants and suicide. *BMJ* 1995;310:215-8.
- 38
- 39 105. Jick SS, C Vasilakis, C Martinez, and H Jick. A study of the relation of exposure to
- 40 quinolones and suicidal behaviour. *Br J Clin Pharmacol* 1998;45:77-81.
- 41
- 42 106. Jick SS, HM Kremers, and C Vasilakis-Scaramozza. Isotretinoin use and risk of
- 43 depression, psychotic symptoms, suicide, and attempted suicide. *Arch Dermatol*
- 44 2000;136:1231-6.
- 45
- 46 107. Jick H, JA Kaye, and SS Jick. Antidepressants and the risk of suicidal behaviors.
- 47 *JAMA* 2004;292:338-43.
- 48
- 49 108. Jick H, KW Hagberg, and P Egger. Rate of suicide in patients taking montelukast.
- 50 *Pharmacotherapy* 2009;29:165-6.
- 51
- 52 109. Lalmohamed A, MT Bazelier, TP Van Staa, BM Uitdehaag, et al. Causes of death in
- 53 patients with multiple sclerosis and matched referent subjects: a population-based
- 54 cohort study. *Eur J Neurol* 2012;19:1007-14.
- 55
- 56 110. Martinez C, S Rietbrock, L Wise, D Ashby, et al. Antidepressant treatment and the
- 57 risk of fatal and non-fatal self harm in first episode depression: nested case-control
- 58 study. *BMJ* 2005;330:389.
- 59
- 60 111. Mines D, D Hill, H Yu, and L Novelli. Prevalence of risk factors for suicide in patients
- prescribed venlafaxine, fluoxetine, and citalopram. *Pharmacoepidemiol Drug Saf*
- 2005;14:367-72.

- 1  
2  
3 112. Osborn D, G Levy, I Nazareth, and M King. Suicide and severe mental illnesses. Cohort study within the UK general practice research database. *Schizophr Res* 2008;99:134-8.
- 4  
5  
6  
7 113. Rubino A, N Roskell, P Tennis, D Mines, et al. Risk of suicide during treatment with venlafaxine, citalopram, fluoxetine, and dothiepin: retrospective cohort study. *BMJ* 2007;334:242.
- 8  
9  
10  
11 114. Schuerch M, C Gasse, NJ Robinson, Y Alvarez, et al. Impact of varying outcomes and definitions of suicidality on the associations of antiepileptic drugs and suicidality: comparisons from UK Clinical Practice Research Datalink (CPRD) and Danish national registries (DNR). *Pharmacoepidemiol Drug Saf* 2016;25 Suppl 1:142-55.
- 12  
13  
14  
15 115. Thomas KH, N Davies, C Metcalfe, F Windmeijer, et al. Validation of suicide and self-harm records in the Clinical Practice Research Datalink. *Br J Clin Pharmacol* 2013;76:145-57.
- 16  
17  
18  
19 116. Tyrrell EG, E Orton, and LJ Tata. Changes in poisonings among adolescents in the UK between 1992 and 2012: a population based cohort study. *Inj Prev* 2016;22:400-406.
- 20  
21  
22  
23 117. Webb RT, E Kontopantelis, T Doran, P Qin, et al. Risk of self-harm in physically ill patients in UK primary care. *J Psychosom Res* 2012;73:92-7.
- 24  
25  
26 118. Webb RT, E Kontopantelis, T Doran, P Qin, et al. Suicide risk in primary care patients with major physical diseases: a case-control study. *Arch Gen Psychiatry* 2012;69:256-64.
- 27  
28  
29  
30 119. Wijlaars LP, I Nazareth, HJ Whitaker, SJ Evans, et al. Suicide-related events in young people following prescription of SSRIs and other antidepressants: a self-controlled case series analysis. *BMJ Open* 2013;3:e003247.
- 31  
32  
33  
34 120. Windfuhr K, D While, N Kapur, DM Ashcroft, et al. Suicide risk linked with clinical consultation frequency, psychiatric diagnoses and psychotropic medication prescribing in a national study of primary-care patients. *Psychol Med* 2016;46:3407-3417.
- 35  
36  
37  
38  
39  
40  
41  
42  
43  
44  
45  
46  
47  
48  
49  
50  
51  
52  
53  
54  
55  
56  
57  
58  
59  
60

## Appendix 11. List of Read codes used in the studies of anxiety.

| Read code | Description                                                  | Number of studies |
|-----------|--------------------------------------------------------------|-------------------|
| Eu41.00   | [X]Other anxiety disorders                                   | 5                 |
| Eu41100   | [X]Generalized anxiety disorder                              | 5                 |
| Eu41z11   | [X]Anxiety NOS                                               | 5                 |
| Eu41000   | [X]Panic disorder [episodic paroxysmal anxiety]              | 4                 |
| Eu05400   | [X]Organic anxiety disorder                                  | 4                 |
| Eu41112   | [X]Anxiety reaction                                          | 4                 |
| Eu41111   | [X]Anxiety neurosis                                          | 4                 |
| Eu41z00   | [X]Anxiety disorder, unspecified                             | 4                 |
| E202.12   | Phobic anxiety                                               | 4                 |
| E200200   | Generalised anxiety disorder                                 | 4                 |
| E200.00   | Anxiety states                                               | 4                 |
| E200000   | Anxiety state unspecified                                    | 4                 |
| E200z00   | Anxiety state NOS                                            | 4                 |
| Eu40.00   | [X]Phobic anxiety disorders                                  | 3                 |
| Eu40z00   | [X]Phobic anxiety disorder, unspecified                      | 3                 |
| Eu41012   | [X]Panic state                                               | 3                 |
| Eu41011   | [X]Panic attack                                              | 3                 |
| Eu41y00   | [X]Other specified anxiety disorders                         | 3                 |
| Eu41300   | [X]Other mixed anxiety disorders                             | 3                 |
| Eu41211   | [X]Mild anxiety depression                                   | 3                 |
| Eu41113   | [X]Anxiety state                                             | 3                 |
| E200500   | Recurrent anxiety                                            | 3                 |
| E200100   | Panic disorder                                               | 3                 |
| E200111   | Panic attack                                                 | 3                 |
| E200400   | Chronic anxiety                                              | 3                 |
| 1B1V.00   | C/O - panic attack                                           | 3                 |
| 1B13.11   | Anxiousness - symptom                                        | 3                 |
| 1B13.00   | Anxiousness                                                  | 3                 |
| E200300   | Anxiety with depression                                      | 3                 |
| Eu93200   | [X]Social anxiety disorder of childhood                      | 2                 |
| Eu34114   | [X]Persistant anxiety depression                             | 2                 |
| Eu40012   | [X]Panic disorder with agoraphobia                           | 2                 |
| Eu40y00   | [X]Other phobic anxiety disorders                            | 2                 |
| Eu41200   | [X]Mixed anxiety and depressive disorder                     | 2                 |
| Eu93y12   | [X]Childhood overanxious disorder                            | 2                 |
| Eu41y11   | [X]Anxiety hysteria                                          | 2                 |
| E2D0.00   | Disturbance of anxiety and fearfulness childhood/adolescent  | 2                 |
| E2D0z00   | Disturbance anxiety and fearfulness childhood/adolescent NOS | 2                 |
| E202100   | Agoraphobia with panic attacks                               | 2                 |
| E292400   | Adjustment reaction with anxious mood                        | 2                 |
| E280.00   | Acute panic state due to acute stress reaction               | 2                 |
| Z4I7.00   | Acknowledging anxiety                                        | 2                 |
| Eu40100   | [X]Social phobias                                            | 1                 |
| Eu40112   | [X]Social neurosis                                           | 1                 |
| Eu93000   | [X]Separation anxiety disorder of childhood                  | 1                 |
| Eu42100   | [X]Predominantly compulsive acts [obsessional rituals]       | 1                 |
| Eu93100   | [X]Phobic anxiety disorder of childhood                      | 1                 |
| Eu42.12   | [X]Obsessive-compulsive neurosis                             | 1                 |
| Eu42.00   | [X]Obsessive - compulsive disorder                           | 1                 |
| Eu45215   | [X]Nosophobia                                                | 1                 |
| Eu46z11   | [X]Neurosis NOS                                              | 1                 |

| Read code | Description                                          | Number of studies |
|-----------|------------------------------------------------------|-------------------|
| Eu40300   | [X]Needle phobia                                     | 1                 |
| Eu45213   | [X]Hypochondriacal neurosis                          | 1                 |
| Eu45212   | [X]Dysmorphophobia nondelusional                     | 1                 |
| Eu51511   | [X]Dream anxiety disorder                            | 1                 |
| Eu40213   | [X]Claustrophobia                                    | 1                 |
| Eu60600   | [X]Anxious [avoidant] personality disorder           | 1                 |
| Eu42.11   | [X]Anankastic neurosis                               | 1                 |
| Eu40011   | [X]Agoraphobia without history of panic disorder     | 1                 |
| Eu40000   | [X]Agoraphobia                                       | 1                 |
| R2y2.00   | [D]Nervousness                                       | 1                 |
| R2y2.12   | [D]Nervous tension                                   | 1                 |
| R2y2.11   | [D]Nerves                                            | 1                 |
| 1BK..00   | Worried                                              | 1                 |
| 1B12.12   | Tension - nervous                                    | 1                 |
| E202300   | Social phobia, fear of eating in public              | 1                 |
| E112000   | Single major depressive episode, unspecified         | 1                 |
| E292000   | Separation anxiety disorder                          | 1                 |
| Z4I7211   | Reducing anxiety                                     | 1                 |
| Z4I7100   | Recognising anxiety                                  | 1                 |
| E29y100   | Other post-traumatic stress disorder                 | 1                 |
| E203z00   | Obsessive-compulsive disorder NOS                    | 1                 |
| E203100   | Obsessional neurosis                                 | 1                 |
| 225J.00   | O/E - panic attack                                   | 1                 |
| 2258.00   | O/E - anxious                                        | 1                 |
| 1465.00   | H/O: depression                                      | 1                 |
| 1466.00   | H/O: anxiety state                                   | 1                 |
| 1B1..00   | General nervous symptoms                             | 1                 |
| E275711   | Compulsive water drinking                            | 1                 |
| E203000   | Compulsive neurosis                                  | 1                 |
| 1P3..00   | Compulsive behaviour                                 | 1                 |
| E202800   | Claustrophobia                                       | 1                 |
| E2D0000   | Childhood and adolescent overanxiousness disturbance | 1                 |
| 1B13.12   | Anxious                                              | 1                 |
| 8G94.00   | Anxiety management training                          | 1                 |
| Z4L1.00   | Anxiety counselling                                  | 1                 |
| E203.11   | Anancastic neurosis                                  | 1                 |
| Z4I7200   | Alleviating anxiety                                  | 1                 |
| E202200   | Agoraphobia without mention of panic attacks         | 1                 |
| 1B12.00   | 'Nerves' - nervousness                               | 1                 |
| 1B12.11   | 'Nerves'                                             | 1                 |

## Appendix 12. List of Read codes used in the studies of depression.

| Read code | Description                                                  | Number of studies |
|-----------|--------------------------------------------------------------|-------------------|
| E112.00   | Single major depressive episode                              | 14                |
| E112000   | Single major depressive episode, unspecified                 | 14                |
| E112100   | Single major depressive episode, mild                        | 14                |
| E112200   | Single major depressive episode, moderate                    | 14                |
| E112300   | Single major depressive episode, severe, without psychosis   | 14                |
| E112z00   | Single major depressive episode NOS                          | 14                |
| E135.00   | Agitated depression                                          | 14                |
| E112.11   | Agitated depression                                          | 13                |
| E112.12   | Endogenous depression first episode                          | 13                |
| E112.13   | Endogenous depression first episode                          | 13                |
| E112.14   | Endogenous depression                                        | 13                |
| E112500   | Single major depressive episode, partial or unspec remission | 13                |
| E2B..00   | Depressive disorder NEC                                      | 13                |
| E2B1.00   | Chronic depression                                           | 13                |
| Eu32.00   | [X]Depressive episode                                        | 13                |
| E113.00   | Recurrent major depressive episode                           | 12                |
| E11y200   | Atypical depressive disorder                                 | 12                |
| E11z200   | Masked depression                                            | 12                |
| Eu32.11   | [X]Single episode of depressive reaction                     | 12                |
| Eu32.12   | [X]Single episode of psychogenic depression                  | 12                |
| Eu32.13   | [X]Single episode of reactive depression                     | 12                |
| Eu32000   | [X]Mild depressive episode                                   | 12                |
| Eu32100   | [X]Moderate depressive episode                               | 12                |
| Eu32200   | [X]Severe depressive episode without psychotic symptoms      | 12                |
| Eu32400   | [X]Mild depression                                           | 12                |
| Eu32y00   | [X]Other depressive episodes                                 | 12                |
| Eu32z00   | [X]Depressive episode, unspecified                           | 12                |
| Eu33.00   | [X]Recurrent depressive disorder                             | 12                |
| E112400   | Single major depressive episode, severe, with psychosis      | 11                |
| E113.11   | Endogenous depression - recurrent                            | 11                |
| E130.11   | Psychotic reactive depression                                | 11                |
| Eu32212   | [X]Single episode major depression w/out psychotic symptoms  | 11                |
| Eu32y11   | [X]Atypical depression                                       | 11                |
| Eu32z11   | [X]Depression NOS                                            | 11                |
| Eu32z12   | [X]Depressive disorder NOS                                   | 11                |
| 1B17.00   | Depressed                                                    | 10                |
| E112600   | Single major depressive episode, in full remission           | 10                |
| E113000   | Recurrent major depressive episodes, unspecified             | 10                |
| E113100   | Recurrent major depressive episodes, mild                    | 10                |
| E113200   | Recurrent major depressive episodes, moderate                | 10                |
| E113300   | Recurrent major depressive episodes, severe, no psychosis    | 10                |
| E113500   | Recurrent major depressive episodes,partial/unspec remission | 10                |
| E113700   | Recurrent depression                                         | 10                |
| E113z00   | Recurrent major depressive episode NOS                       | 10                |
| E130.00   | Reactive depressive psychosis                                | 10                |
| E200300   | Anxiety with depression                                      | 10                |
| E291.00   | Prolonged depressive reaction                                | 10                |
| Eu32211   | [X]Single episode agitated depressn w/out psychotic symptoms | 10                |
| Eu32213   | [X]Single episode vital depression w/out psychotic symptoms  | 10                |
| Eu32311   | [X]Single episode of major depression and psychotic symptoms | 10                |

| Read code | Description                                                  | Number of studies |
|-----------|--------------------------------------------------------------|-------------------|
| Eu32313   | [X]Single episode of psychotic depression                    | 10                |
| Eu32y12   | [X]Single episode of masked depression NOS                   | 10                |
| Eu32z13   | [X]Prolonged single episode of reactive depression           | 10                |
| Eu33.11   | [X]Recurrent episodes of depressive reaction                 | 10                |
| Eu33.12   | [X]Recurrent episodes of psychogenic depression              | 10                |
| Eu33.13   | [X]Recurrent episodes of reactive depression                 | 10                |
| Eu33000   | [X]Recurrent depressive disorder, current episode mild       | 10                |
| Eu33100   | [X]Recurrent depressive disorder, current episode moderate   | 10                |
| Eu33211   | [X]Endogenous depression without psychotic symptoms          | 10                |
| Eu33y00   | [X]Other recurrent depressive disorders                      | 10                |
| Eu33z00   | [X]Recurrent depressive disorder, unspecified                | 10                |
| Eu34114   | [X]Persistant anxiety depression                             | 10                |
| 1B1U.00   | Symptoms of depression                                       | 9                 |
| 1B1U.11   | Depressive symptoms                                          | 9                 |
| E113600   | Recurrent major depressive episodes, in full remission       | 9                 |
| Eu32300   | [X]Severe depressive episode with psychotic symptoms         | 9                 |
| Eu32312   | [X]Single episode of psychogenic depressive psychosis        | 9                 |
| Eu32314   | [X]Single episode of reactive depressive psychosis           | 9                 |
| Eu32500   | [X]Major depression, mild                                    | 9                 |
| Eu32600   | [X]Major depression, moderately severe                       | 9                 |
| Eu32700   | [X]Major depression, severe without psychotic symptoms       | 9                 |
| Eu32z14   | [X] Reactive depression NOS                                  | 9                 |
| Eu33214   | [X]Vital depression, recurrent without psychotic symptoms    | 9                 |
| Eu33311   | [X]Endogenous depression with psychotic symptoms             | 9                 |
| Eu33z11   | [X]Monopolar depression NOS                                  | 9                 |
| Eu34113   | [X]Neurotic depression                                       | 9                 |
| Eu41200   | [X]Mixed anxiety and depressive disorder                     | 9                 |
| Eu41211   | [X]Mild anxiety depression                                   | 9                 |
| 1B17.11   | C/O - feeling depressed                                      | 8                 |
| E113400   | Recurrent major depressive episodes, severe, with psychosis  | 8                 |
| E204.00   | Neurotic depression reactive type                            | 8                 |
| Eu33200   | [X]Recurr depress disorder cur epi severe without psyc sympt | 8                 |
| Eu33212   | [X]Major depression, recurrent without psychotic symptoms    | 8                 |
| Eu33400   | [X]Recurrent depressive disorder, currently in remission     | 8                 |
| Eu34111   | [X]Depressive neurosis                                       | 8                 |
| Eu3y111   | [X]Recurrent brief depressive episodes                       | 8                 |
| 1BT..00   | Depressed mood                                               | 7                 |
| 2257.00   | O/E - depressed                                              | 7                 |
| E11..12   | Depressive psychoses                                         | 7                 |
| Eu32800   | [X]Major depression, severe with psychotic symptoms          | 7                 |
| Eu33.14   | [X]Seasonal depressive disorder                              | 7                 |
| Eu33313   | [X]Recurr severe episodes/major depression+psychotic symptom | 7                 |
| Eu33314   | [X]Recurr severe episodes/psychogenic depressive psychosis   | 7                 |
| Eu33315   | [X]Recurrent severe episodes of psychotic depression         | 7                 |
| Eu33316   | [X]Recurrent severe episodes/reactive depressive psychosis   | 7                 |
| 9H90.00   | Depression annual review                                     | 6                 |
| 9H91.00   | Depression medication review                                 | 6                 |
| 9H92.00   | Depression interim review                                    | 6                 |
| 9HA0.00   | On depression register                                       | 6                 |
| E290.00   | Brief depressive reaction                                    | 6                 |
| Eu33300   | [X]Recurrent depress disorder cur epi severe with psyc symp  | 6                 |
| Eu34100   | [X]Dysthymia                                                 | 6                 |
| E118.00   | Seasonal affective disorder                                  | 5                 |

1  
2  
3  
4  
5  
6  
7  
8  
9  
10  
11  
12  
13  
14  
15  
16  
17  
18  
19  
20  
21  
22  
23  
24  
25  
26  
27  
28  
29  
30  
31  
32  
33  
34  
35  
36  
37  
38  
39  
40  
41  
42  
43  
44  
45  
46  
47  
48  
49  
50  
51  
52  
53  
54  
55  
56  
57  
58  
59  
60

| Read code | Description                                                  | Number of studies |
|-----------|--------------------------------------------------------------|-------------------|
| E204.11   | Postnatal depression                                         | 5                 |
| E290z00   | Brief depressive reaction NOS                                | 5                 |
| Eu53011   | [X]Postnatal depression NOS                                  | 5                 |
| Eu53012   | [X]Postpartum depression NOS                                 | 5                 |
| 1465.00   | H/O: depression                                              | 4                 |
| 1BQ..00   | Loss of capacity for enjoyment                               | 4                 |
| 8HHq.00   | Referral for guided self-help for depression                 | 4                 |
| E02y300   | Drug-induced depressive state                                | 4                 |
| Eu33.15   | [X]SAD - Seasonal affective disorder                         | 4                 |
| R007z13   | [D]Postoperative depression                                  | 4                 |
| 1BP0.00   | Loss of interest in previously enjoyable activity            | 3                 |
| 1BT..11   | Low mood                                                     | 3                 |
| 1BU..00   | Loss of hope for the future                                  | 3                 |
| 212S.00   | Depression resolved                                          | 3                 |
| 8CAa.00   | Patient given advice about management of depression          | 3                 |
| 9Ov0.00   | Depression monitoring first letter                           | 3                 |
| 9Ov1.00   | Depression monitoring second letter                          | 3                 |
| 9Ov2.00   | Depression monitoring third letter                           | 3                 |
| 9Ov3.00   | Depression monitoring verbal invite                          | 3                 |
| 9Ov4.00   | Depression monitoring telephone invite                       | 3                 |
| 9k4..00   | Depression - enhanced services administration                | 3                 |
| E001300   | Presenile dementia with depression                           | 3                 |
| E002100   | Senile dementia with depression                              | 3                 |
| E2B0.00   | Postviral depression                                         | 3                 |
| Eu20400   | [X]Post-schizophrenic depression                             | 3                 |
| Eu34112   | [X]Depressive personality disorder                           | 3                 |
| Eu92000   | [X]Depressive conduct disorder                               | 3                 |
| 1JJ..00   | Suspected depression                                         | 2                 |
| 8BK0.00   | Depression management programme                              | 2                 |
| 9HA1.00   | Removed from depression register                             | 2                 |
| 9Ov..00   | Depression monitoring administration                         | 2                 |
| 9k40.00   | Depression - enhanced service completed                      | 2                 |
| 9kQ..00   | On full dose long term treatment depression - enh serv admin | 2                 |
| E115.00   | Bipolar affective disorder, currently depressed              | 2                 |
| E11y.00   | Other and unspecified manic-depressive psychoses             | 2                 |
| E211200   | Depressive personality disorder                              | 2                 |
| Eu25100   | [X]Schizoaffective disorder, depressive type                 | 2                 |
| Eu25111   | [X]Schizoaffective psychosis, depressive type                | 2                 |
| Eu25112   | [X]Schizophreniform psychosis, depressive type               | 2                 |
| Eu32B00   | [X]Antenatal depression                                      | 2                 |
| Eu33213   | [X]Manic-depress psychosis,depressd,no psychotic symptoms    | 2                 |
| Eu34y00   | [X]Other persistent mood affective disorders                 | 2                 |
| Eu34z00   | [X]Persistent mood affective disorder, unspecified           | 2                 |
| Eu3y100   | [X]Other recurrent mood affective disorders                  | 2                 |
| Eu3z.00   | [X]Unspecified mood affective disorder                       | 2                 |
| 1645.00   | Excessive fluid intake                                       | 1                 |
| 1B1J.00   | Emotional problem                                            | 1                 |
| 1B1J.11   | Emotional upset                                              | 1                 |
| 1BO..00   | Mood swings                                                  | 1                 |
| 1BP..00   | Loss of interest                                             | 1                 |
| 1BT..12   | Sad mood                                                     | 1                 |
| 1S4..00   | Mood observations                                            | 1                 |
| 1S40.00   | Dysphoric mood                                               | 1                 |

| Read code | Description                                                  | Number of studies |
|-----------|--------------------------------------------------------------|-------------------|
| 388J.00   | Hospital anxiety and depression scale                        | 1                 |
| 388K.00   | Geriatric depression scale                                   | 1                 |
| 388P.00   | HAD scale: depression score                                  | 1                 |
| 388g.00   | Beck depression inventory second edition score               | 1                 |
| 62T1.00   | Puerperal depression                                         | 1                 |
| 6896.00   | Depression screening using questions                         | 1                 |
| 8O82.00   | Emotional and psychosocial support and advice                | 1                 |
| 9ON3.00   | Stress monitoring default                                    | 1                 |
| 9ON4.00   | Stress monitoring 1st letter                                 | 1                 |
| 9ON5.00   | Stress monitoring 2nd letter                                 | 1                 |
| 9ON6.00   | Stress monitoring 3rd letter                                 | 1                 |
| 9ON7.00   | Stress monitoring verbal inv.                                | 1                 |
| 9ON8.00   | Stress monitoring phone invite                               | 1                 |
| 9ON9.00   | Stress monitoring deleted                                    | 1                 |
| 9ONA.00   | Stress monitoring check done                                 | 1                 |
| 9ONZ.00   | Stress monitoring admin.NOS                                  | 1                 |
| E002.00   | Senile dementia with depressive or paranoid features         | 1                 |
| E002z00   | Senile dementia with depressive or paranoid features NOS     | 1                 |
| E004300   | Arteriosclerotic dementia with depression                    | 1                 |
| E115.11   | Manic-depressive - now depressed                             | 1                 |
| E115000   | Bipolar affective disorder, currently depressed, unspecified | 1                 |
| E115100   | Bipolar affective disorder, currently depressed, mild        | 1                 |
| E115200   | Bipolar affective disorder, currently depressed, moderate    | 1                 |
| E115300   | Bipolar affect disord, now depressed, severe, no psychosis   | 1                 |
| E115400   | Bipolar affect disord, now depressed, severe with psychosis  | 1                 |
| E115500   | Bipolar affect disord, now depressed, part/unspec remission  | 1                 |
| E115600   | Bipolar affective disorder, now depressed, in full remission | 1                 |
| E115z00   | Bipolar affective disorder, currently depressed, NOS         | 1                 |
| E11y000   | Unspecified manic-depressive psychoses                       | 1                 |
| E11z100   | Rebound mood swings                                          | 1                 |
| E222      |                                                              | 1                 |
| E283.00   | Other acute stress reactions                                 | 1                 |
| E283z00   | Other acute stress reaction NOS                              | 1                 |
| E284.00   | Stress reaction causing mixed disturbance of emotion/conduct | 1                 |
| E28z.00   | Acute stress reaction NOS                                    | 1                 |
| E292.00   | Adjustment reaction, predominant disturbance other emotions  | 1                 |
| E292400   | Adjustment reaction with anxious mood                        | 1                 |
| E292y00   | Adjustment reaction with mixed disturbance of emotion        | 1                 |
| E292z00   | Adjustment reaction with disturbance of other emotion NOS    | 1                 |
| E294.00   | Adjustment reaction with disturbance emotion and conduct     | 1                 |
| E2C4.00   | Mixed disturbance of conduct and emotion                     | 1                 |
| E2C4z00   | Mixed disturbance of conduct and emotion NOS                 | 1                 |
| E35       |                                                              | 1                 |
| E4J5      |                                                              | 1                 |
| Eu02z16   | [X] Senile dementia, depressed or paranoid type              | 1                 |
| Eu3..00   | [X]Mood - affective disorders                                | 1                 |
| Eu31.11   | [X]Manic-depressive illness                                  | 1                 |
| Eu31300   | [X]Bipolar affect disorder cur epi mild or moderate depressn | 1                 |
| Eu31400   | [X]Bipol aff disord, curr epis sev depress, no psychot symp  | 1                 |
| Eu31500   | [X]Bipolar affect dis cur epi severe depres with psyc symp   | 1                 |
| Eu31600   | [X]Bipolar affective disorder, current episode mixed         | 1                 |
| Eu31y00   | [X]Other bipolar affective disorders                         | 1                 |
| Eu31y11   | [X]Bipolar II disorder                                       | 1                 |



1  
2  
3  
4  
5  
6  
7  
8  
9  
10  
11  
12  
13  
14  
15  
16  
17  
18  
19  
20  
21  
22  
23  
24  
25  
26  
27  
28  
29  
30  
31  
32  
33  
34  
35  
36  
37  
38  
39  
40  
41  
42  
43  
44  
45  
46  
47  
48  
49  
50  
51  
52  
53  
54  
55  
56  
57  
58  
59  
60

| Read code | Description                                                  | Number of studies |
|-----------|--------------------------------------------------------------|-------------------|
| Eu31z00   | [X]Bipolar affective disorder, unspecified                   | 1                 |
| Eu33312   | [X]Manic-depress psychosis,depressed type+psychotic symptoms | 1                 |
| Eu34.00   | [X]Persistent mood affective disorders                       | 1                 |
| Eu3y.00   | [X]Other mood affective disorders                            | 1                 |
| Eu3y000   | [X]Other single mood affective disorders                     | 1                 |
| Eu3y011   | [X]Mixed affective episode                                   | 1                 |
| Eu3yy00   | [X]Other specified mood affective disorders                  | 1                 |
| Eu4..00   | [X]Neurotic, stress - related and somoform disorders         | 1                 |
| Eu43.00   | [X]Reaction to severe stress, and adjustment disorders       | 1                 |
| Eu43000   | [X]Acute stress reaction                                     | 1                 |
| Eu43012   | [X]Acute reaction to stress                                  | 1                 |
| Eu43y00   | [X]Other reactions to severe stress                          | 1                 |
| Eu43z00   | [X]Reaction to severe stress, unspecified                    | 1                 |
| Eu92.11   | [X]Emotional behavioural problems                            | 1                 |
| R007z14   | [D]Work stress                                               | 1                 |
| ZR2A.00   | Beck depression inventory                                    | 1                 |
| ZR2A.11   | BDI - Beck depression inventory                              | 1                 |
| ZR2B.00   | Beck hopelessness scale                                      | 1                 |
| ZR2G.00   | Behaviour and mood disturbance scale                         | 1                 |
| ZR2h.00   | Brief depression rating scale                                | 1                 |
| ZR7..00   | Depression anxiety scale                                     | 1                 |
| ZR8..00   | Depression self rating scale                                 | 1                 |
| ZR8..11   | DSRS - Depression self rating scale                          | 1                 |
| ZRBY.00   | Edinburgh postnatal depression scale                         | 1                 |
| ZRBY.11   | EPDS - Edinburgh postnatal depression scale                  | 1                 |
| ZRL6.00   | Geriatric depression scale                                   | 1                 |
| ZRL6.11   | GDS - Geriatric depression scale                             | 1                 |
| ZRL6.12   | Geriatric depression score                                   | 1                 |
| ZRLU.00   | Hamilton rating scale for depression                         | 1                 |
| ZRLU.11   | HAMD - Hamilton rating scale for depression                  | 1                 |
| ZRLU.12   | HRSD - Hamilton rating scale for depression                  | 1                 |
| ZRLfH00   | Health of the Nation Outcome Scale item 7 - depressed mood   | 1                 |
| ZRLfI00   | Health of the Nation Outcome Scale item 7 - depressed mood   | 1                 |
| ZRLn.00   | Hopelessness scale                                           | 1                 |
| ZRLr.00   | Hospital anxiety and depression scale                        | 1                 |
| ZRLr.11   | HAD - Hospital anxiety and depression scale                  | 1                 |
| ZRLr.12   | HADS - Hospital anxiety and depression scale                 | 1                 |
| ZRVM.00   | Leeds scale for the self-assessment of anxiety & depression  | 1                 |
| ZRaH.00   | Mood affective checklist                                     | 1                 |
| ZRaH.11   | MACL - Mood affective checklist                              | 1                 |
| ZRbS.00   | Positive and negative affect schedule                        | 1                 |
| ZRby.00   | Profile of mood states                                       | 1                 |
| ZRby.11   | POMS - Profile of mood states                                | 1                 |
| ZRrI.00   | Wakefield self-assessment depression inventory               | 1                 |
| ZRrY.00   | WHO depression scale                                         | 1                 |
| ZRrc.00   | Zung self-rating depression scale                            | 1                 |
| ZRrc.11   | SDS - Zung self-rating depression scale                      | 1                 |
| ZV11100   | [V]Personal history of affective disorder                    | 1                 |
| ZV11111   | [V]Personal history of manic-depressive psychosis            | 1                 |
| ZV11112   | [V]Personal history of manic-depressive psychosis            | 1                 |

### Appendix 13. List of Read codes used in the studies of composite outcomes of anxiety and depression.

| Read code | Description                                                  | Number of studies |
|-----------|--------------------------------------------------------------|-------------------|
| Eu32200   | [X]Severe depressive episode without psychotic symptoms      | 2                 |
| Eu33z00   | [X]Recurrent depressive disorder, unspecified                | 2                 |
| Eu33400   | [X]Recurrent depressive disorder, currently in remission     | 2                 |
| Eu33100   | [X]Recurrent depressive disorder, current episode moderate   | 2                 |
| Eu33000   | [X]Recurrent depressive disorder, current episode mild       | 2                 |
| Eu33.00   | [X]Recurrent depressive disorder                             | 2                 |
| Eu33200   | [X]Recurr depress disorder cur epi severe without psyc sympt | 2                 |
| Eu41000   | [X]Panic disorder [episodic paroxysmal anxiety]              | 2                 |
| Eu41y00   | [X]Other specified anxiety disorders                         | 2                 |
| Eu33y00   | [X]Other recurrent depressive disorders                      | 2                 |
| Eu32y00   | [X]Other depressive episodes                                 | 2                 |
| Eu41.00   | [X]Other anxiety disorders                                   | 2                 |
| Eu32100   | [X]Moderate depressive episode                               | 2                 |
| Eu41200   | [X]Mixed anxiety and depressive disorder                     | 2                 |
| Eu32000   | [X]Mild depressive episode                                   | 2                 |
| Eu32400   | [X]Mild depression                                           | 2                 |
| Eu41100   | [X]Generalized anxiety disorder                              | 2                 |
| Eu34100   | [X]Dysthymia                                                 | 2                 |
| Eu32z00   | [X]Depressive episode, unspecified                           | 2                 |
| Eu32.00   | [X]Depressive episode                                        | 2                 |
| Eu41z00   | [X]Anxiety disorder, unspecified                             | 2                 |
| 1B1U.00   | Symptoms of depression                                       | 2                 |
| E112000   | Single major depressive episode, unspecified                 | 2                 |
| E112300   | Single major depressive episode, severe, without psychosis   | 2                 |
| E112500   | Single major depressive episode, partial or unspec remission | 2                 |
| E112200   | Single major depressive episode, moderate                    | 2                 |
| E112100   | Single major depressive episode, mild                        | 2                 |
| E112600   | Single major depressive episode, in full remission           | 2                 |
| E112z00   | Single major depressive episode NOS                          | 2                 |
| E112.00   | Single major depressive episode                              | 2                 |
| E118.00   | Seasonal affective disorder                                  | 2                 |
| E113500   | Recurrent major depressive episodes,partial/unspec remission | 2                 |
| E113000   | Recurrent major depressive episodes, unspecified             | 2                 |
| E113300   | Recurrent major depressive episodes, severe, no psychosis    | 2                 |
| E113200   | Recurrent major depressive episodes, moderate                | 2                 |
| E113100   | Recurrent major depressive episodes, mild                    | 2                 |
| E113600   | Recurrent major depressive episodes, in full remission       | 2                 |
| E113z00   | Recurrent major depressive episode NOS                       | 2                 |
| E113.00   | Recurrent major depressive episode                           | 2                 |
| E113700   | Recurrent depression                                         | 2                 |
| E200500   | Recurrent anxiety                                            | 2                 |
| E291.00   | Prolonged depressive reaction                                | 2                 |
| E2B0.00   | Postviral depression                                         | 2                 |
| E200100   | Panic disorder                                               | 2                 |
| 2257.00   | O/E - depressed                                              | 2                 |
| E204.00   | Neurotic depression reactive type                            | 2                 |
| E200200   | Generalised anxiety disorder                                 | 2                 |
| E2B..00   | Depressive disorder NEC                                      | 2                 |
| 1BT..00   | Depressed mood                                               | 2                 |
| 1B17.00   | Depressed                                                    | 2                 |

1  
2  
3  
4  
5  
6  
7  
8  
9  
10  
11  
12  
13  
14  
15  
16  
17  
18  
19  
20  
21  
22  
23  
24  
25  
26  
27  
28  
29  
30  
31  
32  
33  
34  
35  
36  
37  
38  
39  
40  
41  
42  
43  
44  
45  
46  
47  
48  
49  
50  
51  
52  
53  
54  
55  
56  
57  
58  
59  
60

| Read code | Description                                                  | Number of studies |
|-----------|--------------------------------------------------------------|-------------------|
| E2B1.00   | Chronic depression                                           | 2                 |
| E200400   | Chronic anxiety                                              | 2                 |
| E200300   | Anxiety with depression                                      | 2                 |
| E200.00   | Anxiety states                                               | 2                 |
| E200000   | Anxiety state unspecified                                    | 2                 |
| E200z00   | Anxiety state NOS                                            | 2                 |
| E135.00   | Agitated depression                                          | 2                 |
| Eu33214   | [X]Vital depression, recurrent without psychotic symptoms    | 1                 |
| Eu3z.00   | [X]Unspecified mood affective disorder                       | 1                 |
| Eu40100   | [X]Social phobias                                            | 1                 |
| Eu40112   | [X]Social neurosis                                           | 1                 |
| Eu32213   | [X]Single episode vital depression w/out psychotic symptoms  | 1                 |
| Eu32314   | [X]Single episode of reactive depressive psychosis           | 1                 |
| Eu32.13   | [X]Single episode of reactive depression                     | 1                 |
| Eu32313   | [X]Single episode of psychotic depression                    | 1                 |
| Eu32312   | [X]Single episode of psychogenic depressive psychosis        | 1                 |
| Eu32.12   | [X]Single episode of psychogenic depression                  | 1                 |
| Eu32y12   | [X]Single episode of masked depression NOS                   | 1                 |
| Eu32311   | [X]Single episode of major depression and psychotic symptoms | 1                 |
| Eu32.11   | [X]Single episode of depressive reaction                     | 1                 |
| Eu32212   | [X]Single episode major depression w/out psychotic symptoms  | 1                 |
| Eu32211   | [X]Single episode agitated depressn w/out psychotic symptoms | 1                 |
| Eu32300   | [X]Severe depressive episode with psychotic symptoms         | 1                 |
| Eu33.14   | [X]Seasonal depressive disorder                              | 1                 |
| Eu33.15   | [X]SAD - Seasonal affective disorder                         | 1                 |
| Eu06y11   | [X]Right hemispheric organic affective disorder              | 1                 |
| Eu33316   | [X]Recurrent severe episodes/reactive depressive psychosis   | 1                 |
| Eu33315   | [X]Recurrent severe episodes of psychotic depression         | 1                 |
| Eu33.13   | [X]Recurrent episodes of reactive depression                 | 1                 |
| Eu33.12   | [X]Recurrent episodes of psychogenic depression              | 1                 |
| Eu33.11   | [X]Recurrent episodes of depressive reaction                 | 1                 |
| Eu33300   | [X]Recurrent depress disorder cur epi severe with psyc symp  | 1                 |
| Eu3y111   | [X]Recurrent brief depressive episodes                       | 1                 |
| Eu33314   | [X]Recurr severe episodes/psychogenic depressive psychosis   | 1                 |
| Eu33313   | [X]Recurr severe episodes/major depression+psychotic symptom | 1                 |
| Eu43z00   | [X]Reaction to severe stress, unspecified                    | 1                 |
| Eu43.00   | [X]Reaction to severe stress, and adjustment disorders       | 1                 |
| Eu32z13   | [X]Prolonged single episode of reactive depression           | 1                 |
| Eu42100   | [X]Predominantly compulsive acts [obsessional rituals]       | 1                 |
| Eu20400   | [X]Post-schizophrenic depression                             | 1                 |
| Eu43100   | [X]Post - traumatic stress disorder                          | 1                 |
| Eu40.00   | [X]Phobic anxiety disorders                                  | 1                 |
| Eu34.00   | [X]Persistent mood affective disorders                       | 1                 |
| Eu34z00   | [X]Persistent mood affective disorder, unspecified           | 1                 |
| Eu34114   | [X]Persistant anxiety depression                             | 1                 |
| Eu41012   | [X]Panic state                                               | 1                 |
| Eu40012   | [X]Panic disorder with agoraphobia                           | 1                 |
| Eu41011   | [X]Panic attack                                              | 1                 |
| Eu3yy00   | [X]Other specified mood affective disorders                  | 1                 |
| Eu3y000   | [X]Other single mood affective disorders                     | 1                 |
| Eu3y100   | [X]Other recurrent mood affective disorders                  | 1                 |
| Eu43y00   | [X]Other reactions to severe stress                          | 1                 |
| Eu34y00   | [X]Other persistent mood affective disorders                 | 1                 |

| Read code | Description                                                  | Number of studies |
|-----------|--------------------------------------------------------------|-------------------|
| Eu42y00   | [X]Other obsessive-compulsive disorders                      | 1                 |
| Eu3y.00   | [X]Other mood affective disorders                            | 1                 |
| Eu41300   | [X]Other mixed anxiety disorders                             | 1                 |
| Eu31y00   | [X]Other bipolar affective disorders                         | 1                 |
| Eu05300   | [X]Organic mood [affective] disorders                        | 1                 |
| Eu05400   | [X]Organic anxiety disorder                                  | 1                 |
| Eu60513   | [X]Obsessive-compulsive personality disorder                 | 1                 |
| Eu42.12   | [X]Obsessive-compulsive neurosis                             | 1                 |
| Eu42z00   | [X]Obsessive-compulsive disorder, unspecified                | 1                 |
| Eu42.00   | [X]Obsessive - compulsive disorder                           | 1                 |
| Eu4..00   | [X]Neurotic, stress - related and somoform disorders         | 1                 |
| Eu34113   | [X]Neurotic depression                                       | 1                 |
| Eu3..00   | [X]Mood - affective disorders                                | 1                 |
| Eu33z11   | [X]Monopolar depression NOS                                  | 1                 |
| Eu3y011   | [X]Mixed affective episode                                   | 1                 |
| Eu41211   | [X]Mild anxiety depression                                   | 1                 |
| Eu31.13   | [X]Manic-depressive reaction                                 | 1                 |
| Eu31.12   | [X]Manic-depressive psychosis                                | 1                 |
| Eu31.11   | [X]Manic-depressive illness                                  | 1                 |
| Eu33312   | [X]Manic-depress psychosis,depressed type+psychotic symptoms | 1                 |
| Eu33213   | [X]Manic-depress psychosis,depressd,no psychotic symptoms    | 1                 |
| Eu32700   | [X]Major depression, severe without psychotic symptoms       | 1                 |
| Eu32800   | [X]Major depression, severe with psychotic symptoms          | 1                 |
| Eu33212   | [X]Major depression, recurrent without psychotic symptoms    | 1                 |
| Eu32600   | [X]Major depression, moderately severe                       | 1                 |
| Eu32500   | [X]Major depression, mild                                    | 1                 |
| Eu33211   | [X]Endogenous depression without psychotic symptoms          | 1                 |
| Eu33311   | [X]Endogenous depression with psychotic symptoms             | 1                 |
| Eu51511   | [X]Dream anxiety disorder                                    | 1                 |
| Eu34112   | [X]Depressive personality disorder                           | 1                 |
| Eu34111   | [X]Depressive neurosis                                       | 1                 |
| Eu32z12   | [X]Depressive disorder NOS                                   | 1                 |
| Eu92000   | [X]Depressive conduct disorder                               | 1                 |
| Eu32z11   | [X]Depression NOS                                            | 1                 |
| Eu60511   | [X]Compulsive personality disorder                           | 1                 |
| Eu63011   | [X]Compulsive gambling                                       | 1                 |
| Eu43013   | [X]Combat fatigue                                            | 1                 |
| Eu31z00   | [X]Bipolar affective disorder, unspecified                   | 1                 |
| Eu31700   | [X]Bipolar affective disorder, currently in remission        | 1                 |
| Eu31600   | [X]Bipolar affective disorder, current episode mixed         | 1                 |
| Eu31900   | [X]Bipolar affective disorder type II                        | 1                 |
| Eu31800   | [X]Bipolar affective disorder type I                         | 1                 |
| Eu31.00   | [X]Bipolar affective disorder                                | 1                 |
| Eu31300   | [X]Bipolar affect disorder cur epi mild or moderate depressn | 1                 |
| Eu31500   | [X]Bipolar affect dis cur epi severe depres with psyc symp   | 1                 |
| Eu31y11   | [X]Bipolar II disorder                                       | 1                 |
| Eu31911   | [X]Bipolar II disorder                                       | 1                 |
| Eu31400   | [X]Bipol aff disord, curr epi sev depress, no psychot symp   | 1                 |
| Eu32y11   | [X]Atypical depression                                       | 1                 |
| Eu41113   | [X]Anxiety state                                             | 1                 |
| Eu41112   | [X]Anxiety reaction                                          | 1                 |
| Eu41111   | [X]Anxiety neurosis                                          | 1                 |
| Eu41y11   | [X]Anxiety hysteria                                          | 1                 |

1  
2  
3  
4  
5  
6  
7  
8  
9  
10  
11  
12  
13  
14  
15  
16  
17  
18  
19  
20  
21  
22  
23  
24  
25  
26  
27  
28  
29  
30  
31  
32  
33  
34  
35  
36  
37  
38  
39  
40  
41  
42  
43  
44  
45  
46  
47  
48  
49  
50  
51  
52  
53  
54  
55  
56  
57  
58  
59  
60

| Read code | Description                                                  | Number of studies |
|-----------|--------------------------------------------------------------|-------------------|
| Eu41z11   | [X]Anxiety NOS                                               | 1                 |
| Eu42.11   | [X]Anankastic neurosis                                       | 1                 |
| Eu40011   | [X]Agoraphobia without history of panic disorder             | 1                 |
| Eu40000   | [X]Agoraphobia                                               | 1                 |
| Eu3z.11   | [X]Affective psychosis NOS                                   | 1                 |
| Eu34011   | [X]Affective personality disorder                            | 1                 |
| Eu43000   | [X]Acute stress reaction                                     | 1                 |
| Eu43012   | [X]Acute reaction to stress                                  | 1                 |
| Eu32z14   | [X] Reactive depression NOS                                  | 1                 |
| ZV11112   | [V]Personal history of manic-depressive psychosis            | 1                 |
| ZV11111   | [V]Personal history of manic-depressive psychosis            | 1                 |
| ZV11100   | [V]Personal history of affective disorder                    | 1                 |
| R2y2.00   | [D]Nervousness                                               | 1                 |
| 1BK..00   | Worried                                                      | 1                 |
| E11y000   | Unspecified manic-depressive psychoses                       | 1                 |
| E117400   | Unspecified bipolar affective disorder,severe with psychosis | 1                 |
| E117000   | Unspecified bipolar affective disorder, unspecified          | 1                 |
| E117300   | Unspecified bipolar affective disorder, severe, no psychosis | 1                 |
| E117200   | Unspecified bipolar affective disorder, moderate             | 1                 |
| E117100   | Unspecified bipolar affective disorder, mild                 | 1                 |
| E117600   | Unspecified bipolar affective disorder, in full remission    | 1                 |
| E117z00   | Unspecified bipolar affective disorder, NOS                  | 1                 |
| E117.00   | Unspecified bipolar affective disorder                       | 1                 |
| E117500   | Unspecified bipolar affect disord, partial/unspec remission  | 1                 |
| E11z000   | Unspecified affective psychoses NOS                          | 1                 |
| E211000   | Unspecified affective personality disorder                   | 1                 |
| 1JJ..00   | Suspected depression                                         | 1                 |
| E284.00   | Stress reaction causing mixed disturbance of emotion/conduct | 1                 |
| 67J..00   | Stress counselling                                           | 1                 |
| E202.11   | Social phobic disorders                                      | 1                 |
| E112400   | Single major depressive episode, severe, with psychosis      | 1                 |
| E002z00   | Senile dementia with depressive or paranoid features NOS     | 1                 |
| E002.00   | Senile dementia with depressive or paranoid features         | 1                 |
| E002100   | Senile dementia with depression                              | 1                 |
| 1BT..12   | Sad mood                                                     | 1                 |
| 8HHq.00   | Referral for guided self-help for depression                 | 1                 |
| 8HHp.00   | Referral for guided self-help for anxiety                    | 1                 |
| Z4I7211   | Reducing anxiety                                             | 1                 |
| E113400   | Recurrent major depressive episodes, severe, with psychosis  | 1                 |
| Z4I7100   | Recognising anxiety                                          | 1                 |
| E11z100   | Rebound mood swings                                          | 1                 |
| E130.00   | Reactive depressive psychosis                                | 1                 |
| E130.11   | Psychotic reactive depression                                | 1                 |
| E001300   | Presenile dementia with depression                           | 1                 |
| E2A2.11   | Post-traumatic brain syndrome                                | 1                 |
| E202.00   | Phobic disorders                                             | 1                 |
| E202.12   | Phobic anxiety                                               | 1                 |
| E202000   | Phobia unspecified                                           | 1                 |
| 8CAa.00   | Patient given advice about management of depression          | 1                 |
| E200111   | Panic attack                                                 | 1                 |
| E29y100   | Other post-traumatic stress disorder                         | 1                 |
| E11y300   | Other mixed manic-depressive psychoses                       | 1                 |
| E11yz00   | Other and unspecified manic-depressive psychoses NOS         | 1                 |

| Read code | Description                                                  | Number of studies |
|-----------|--------------------------------------------------------------|-------------------|
| E11y.00   | Other and unspecified manic-depressive psychoses             | 1                 |
| E11z.00   | Other and unspecified affective psychoses                    | 1                 |
| E11zz00   | Other affective psychosis NOS                                | 1                 |
| E283.00   | Other acute stress reactions                                 | 1                 |
| E283z00   | Other acute stress reaction NOS                              | 1                 |
| E03y200   | Organic affective syndrome                                   | 1                 |
| 9kQ..00   | On full dose long term treatment depression - enh serv admin | 1                 |
| 9HA0.00   | On depression register                                       | 1                 |
| E203.00   | Obsessive-compulsive disorders                               | 1                 |
| E203z00   | Obsessive-compulsive disorder NOS                            | 1                 |
| E214100   | Obsessional personality                                      | 1                 |
| E203100   | Obsessional neurosis                                         | 1                 |
| 225J.00   | O/E - panic attack                                           | 1                 |
| 2259.00   | O/E - nervous                                                | 1                 |
| 225K.00   | O/E - fearful mood                                           | 1                 |
| 2253.00   | O/E - distressed                                             | 1                 |
| 2258.00   | O/E - anxious                                                | 1                 |
| E116000   | Mixed bipolar affective disorder, unspecified                | 1                 |
| E116300   | Mixed bipolar affective disorder, severe, without psychosis  | 1                 |
| E116400   | Mixed bipolar affective disorder, severe, with psychosis     | 1                 |
| E116500   | Mixed bipolar affective disorder, partial/unspec remission   | 1                 |
| E116200   | Mixed bipolar affective disorder, moderate                   | 1                 |
| E116100   | Mixed bipolar affective disorder, mild                       | 1                 |
| E116600   | Mixed bipolar affective disorder, in full remission          | 1                 |
| E116z00   | Mixed bipolar affective disorder, NOS                        | 1                 |
| E116.00   | Mixed bipolar affective disorder                             | 1                 |
| E11z200   | Masked depression                                            | 1                 |
| E115.11   | Manic-depressive - now depressed                             | 1                 |
| 13Y3.00   | Manic-depression association member                          | 1                 |
| 1BT..11   | Low mood                                                     | 1                 |
| 1BU..00   | Loss of hope for the future                                  | 1                 |
| 1BQ..00   | Loss of capacity for enjoyment                               | 1                 |
| 146D.00   | H/O: manic depressive disorder                               | 1                 |
| 1465.00   | H/O: depression                                              | 1                 |
| 1466.00   | H/O: anxiety state                                           | 1                 |
| 1B1H.00   | Frightened                                                   | 1                 |
| Z522600   | Flooding - obsessional compulsive disorder                   | 1                 |
| 1B1T.00   | Feeling stressed                                             | 1                 |
| 16ZB100   | Feeling low or worried                                       | 1                 |
| E202D00   | Fear of death                                                | 1                 |
| 1B1H.11   | Fear                                                         | 1                 |
| 9hC..00   | Exception reporting: depression quality indicators           | 1                 |
| 9hC0.00   | Excepted from depression quality indicators: Patient unsuita | 1                 |
| 9hC1.00   | Excepted from depression quality indicators: Informed dissen | 1                 |
| E112.13   | Endogenous depression first episode                          | 1                 |
| E112.12   | Endogenous depression first episode                          | 1                 |
| E113.11   | Endogenous depression - recurrent                            | 1                 |
| E112.14   | Endogenous depression                                        | 1                 |
| 9N54.00   | Encounter for fear                                           | 1                 |
| 1B1U.11   | Depressive symptoms                                          | 1                 |
| E11..12   | Depressive psychoses                                         | 1                 |
| E211200   | Depressive personality disorder                              | 1                 |
| 9Ov3.00   | Depression monitoring verbal invite                          | 1                 |

1  
2  
3  
4  
5  
6  
7  
8  
9  
10  
11  
12  
13  
14  
15  
16  
17  
18  
19  
20  
21  
22  
23  
24  
25  
26  
27  
28  
29  
30  
31  
32  
33  
34  
35  
36  
37  
38  
39  
40  
41  
42  
43  
44  
45  
46  
47  
48  
49  
50  
51  
52  
53  
54  
55  
56  
57  
58  
59  
60

| Read code | Description                                                  | Number of studies |
|-----------|--------------------------------------------------------------|-------------------|
| 9Ov2.00   | Depression monitoring third letter                           | 1                 |
| 9Ov4.00   | Depression monitoring telephone invite                       | 1                 |
| 9Ov1.00   | Depression monitoring second letter                          | 1                 |
| 9Ov0.00   | Depression monitoring first letter                           | 1                 |
| 9Ov..00   | Depression monitoring administration                         | 1                 |
| 9H91.00   | Depression medication review                                 | 1                 |
| 8BK0.00   | Depression management programme                              | 1                 |
| 9H92.00   | Depression interim review                                    | 1                 |
| 9H90.00   | Depression annual review                                     | 1                 |
| 9k4..00   | Depression - enhanced services administration                | 1                 |
| 9k40.00   | Depression - enhanced service completed                      | 1                 |
| E214.00   | Compulsive personality disorders                             | 1                 |
| E214z00   | Compulsive personality disorder NOS                          | 1                 |
| E203000   | Compulsive neurosis                                          | 1                 |
| 1P3..00   | Compulsive behaviour                                         | 1                 |
| E28..11   | Combat fatigue                                               | 1                 |
| 1B1V.00   | C/O - panic attack                                           | 1                 |
| 1B17.11   | C/O - feeling depressed                                      | 1                 |
| E290z00   | Brief depressive reaction NOS                                | 1                 |
| E290.00   | Brief depressive reaction                                    | 1                 |
| E11..11   | Bipolar psychoses                                            | 1                 |
| E115600   | Bipolar affective disorder, now depressed, in full remission | 1                 |
| E115000   | Bipolar affective disorder, currently depressed, unspecified | 1                 |
| E115200   | Bipolar affective disorder, currently depressed, moderate    | 1                 |
| E115100   | Bipolar affective disorder, currently depressed, mild        | 1                 |
| E115z00   | Bipolar affective disorder, currently depressed, NOS         | 1                 |
| E115.00   | Bipolar affective disorder, currently depressed              | 1                 |
| E115300   | Bipolar affect disord, now depressed, severe, no psychosis   | 1                 |
| E115400   | Bipolar affect disord, now depressed, severe with psychosis  | 1                 |
| E115500   | Bipolar affect disord, now depressed, part/unspec remission  | 1                 |
| E11y200   | Atypical depressive disorder                                 | 1                 |
| E004300   | Arteriosclerotic dementia with depression                    | 1                 |
| 1B1H.12   | Apprehension                                                 | 1                 |
| 1B13.00   | Anxiousness                                                  | 1                 |
| 8G94.00   | Anxiety management training                                  | 1                 |
| Z4L1.00   | Anxiety counselling                                          | 1                 |
| 173f.00   | Anxiety about breathlessness                                 | 1                 |
| 6659000   | Antidepressant drug treatment started                        | 1                 |
| E214000   | Anankastic personality                                       | 1                 |
| E203.11   | Anancastic neurosis                                          | 1                 |
| Z4I7200   | Alleviating anxiety                                          | 1                 |
| E202200   | Agoraphobia without mention of panic attacks                 | 1                 |
| E202100   | Agoraphobia with panic attacks                               | 1                 |
| E112.11   | Agitated depression                                          | 1                 |
| E11..00   | Affective psychoses                                          | 1                 |
| E211.00   | Affective personality disorder                               | 1                 |
| E292400   | Adjustment reaction with anxious mood                        | 1                 |
| E282.00   | Acute stupor state due to acute stress reaction              | 1                 |
| E28z.00   | Acute stress reaction NOS                                    | 1                 |
| E28..00   | Acute reaction to stress                                     | 1                 |
| E283100   | Acute posttrauma stress state                                | 1                 |
| E280.00   | Acute panic state due to acute stress reaction               | 1                 |
| E281.00   | Acute fugue state due to acute stress reaction               | 1                 |

| Read code | Description            | Number of studies |
|-----------|------------------------|-------------------|
| Z4I7.00   | Acknowledging anxiety  | 1                 |
| 1B12.00   | 'Nerves' - nervousness | 1                 |
| 9kQ..11   |                        | 1                 |

For peer review only



**Appendix 14. List of Read codes used in the studies of dementia and cognitive impairment.**

| Read code | Description                                                  | Number of studies |
|-----------|--------------------------------------------------------------|-------------------|
| Eu01.00   | [X]Vascular dementia                                         | 13                |
| Eu01200   | [X]Subcortical vascular dementia                             | 13                |
| Eu00112   | [X]Senile dementia,Alzheimer's type                          | 13                |
| Eu00011   | [X]Presenile dementia,Alzheimer's type                       | 13                |
| Eu01100   | [X]Multi-infarct dementia                                    | 13                |
| Eu00.00   | [X]Dementia in Alzheimer's disease                           | 13                |
| Eu01.11   | [X]Arteriosclerotic dementia                                 | 13                |
| Eu00z11   | [X]Alzheimer's dementia unspec                               | 13                |
| E000.00   | Uncomplicated senile dementia                                | 13                |
| E004.11   | Multi infarct dementia                                       | 13                |
| E004.00   | Arteriosclerotic dementia                                    | 13                |
| F110000   | Alzheimer's disease with early onset                         | 13                |
| F110.00   | Alzheimer's disease                                          | 13                |
| Eu01z00   | [X]Vascular dementia, unspecified                            | 12                |
| Eu01000   | [X]Vascular dementia of acute onset                          | 12                |
| Eu00012   | [X]Primary degen dementia, Alzheimer's type, presenile onset | 12                |
| Eu00113   | [X]Primary degen dementia of Alzheimer's type, senile onset  | 12                |
| Eu01111   | [X]Predominantly cortical dementia                           | 12                |
| Eu00z00   | [X]Dementia in Alzheimer's disease, unspecified              | 12                |
| Eu00100   | [X]Dementia in Alzheimer's disease with late onset           | 12                |
| Eu00000   | [X]Dementia in Alzheimer's disease with early onset          | 12                |
| Eu00200   | [X]Dementia in Alzheimer's dis, atypical or mixed type       | 12                |
| Eu00013   | [X]Alzheimer's disease type 2                                | 12                |
| Eu00111   | [X]Alzheimer's disease type 1                                | 12                |
| E004000   | Uncomplicated arteriosclerotic dementia                      | 12                |
| E004200   | Arteriosclerotic dementia with paranoia                      | 12                |
| E004300   | Arteriosclerotic dementia with depression                    | 12                |
| E004100   | Arteriosclerotic dementia with delirium                      | 12                |
| E004z00   | Arteriosclerotic dementia NOS                                | 12                |
| F110100   | Alzheimer's disease with late onset                          | 12                |
| Eu01y00   | [X]Other vascular dementia                                   | 11                |
| Eu01300   | [X]Mixed cortical and subcortical vascular dementia          | 11                |
| Eu02.00   | [X]Dementia in other diseases classified elsewhere           | 11                |
| Eu02300   | [X]Dementia in Parkinson's disease                           | 11                |
| Eu02z00   | [X] Unspecified dementia                                     | 11                |
| Eu02z14   | [X] Senile dementia NOS                                      | 11                |
| E00..12   | Senile/presenile dementia                                    | 11                |
| E002000   | Senile dementia with paranoia                                | 11                |
| E002100   | Senile dementia with depression                              | 11                |
| E001.00   | Presenile dementia                                           | 11                |
| E041.00   | Dementia in conditions EC                                    | 11                |
| Fyu3000   | [X]Other Alzheimer's disease                                 | 10                |
| Eu02500   | [X]Lewy body dementia                                        | 10                |
| Eu02y00   | [X]Dementia in other specified diseases classif elsewhere    | 10                |
| Eu04100   | [X]Delirium superimposed on dementia                         | 10                |
| Eu02z16   | [X] Senile dementia, depressed or paranoid type              | 10                |
| Eu02z13   | [X] Primary degenerative dementia NOS                        | 10                |
| Eu02z11   | [X] Presenile dementia NOS                                   | 10                |
| E001000   | Uncomplicated presenile dementia                             | 10                |
| E002z00   | Senile dementia with depressive or paranoid features NOS     | 10                |

| Read code | Description                                          | Number of studies |
|-----------|------------------------------------------------------|-------------------|
| E002.00   | Senile dementia with depressive or paranoid features | 10                |
| E003.00   | Senile dementia with delirium                        | 10                |
| E00..11   | Senile dementia                                      | 10                |
| E001200   | Presenile dementia with paranoia                     | 10                |
| E001300   | Presenile dementia with depression                   | 10                |
| E001100   | Presenile dementia with delirium                     | 10                |
| E001z00   | Presenile dementia NOS                               | 10                |
| Eu02000   | [X]Dementia in Pick's disease                        | 9                 |
| Eu02200   | [X]Dementia in Huntington's disease                  | 9                 |
| Eu02400   | [X]Dementia in human immunodef virus [HIV] disease   | 8                 |
| Eu02100   | [X]Dementia in Creutzfeldt-Jakob disease             | 8                 |
| F112.00   | Senile degeneration of brain                         | 8                 |
| F116.00   | Lewy body disease                                    | 8                 |
| F111.00   | Pick's disease                                       | 7                 |
| E012.00   | Other alcoholic dementia                             | 6                 |
| E012.11   | Alcoholic dementia NOS                               | 6                 |
| Eu10711   | [X]Alcoholic dementia NOS                            | 5                 |
| E00z.00   | Senile or presenile psychoses NOS                    | 5                 |
| 6AB..00   | Dementia annual review                               | 5                 |
| Eu02z15   | [X] Senile psychosis NOS                             | 4                 |
| Eu02z12   | [X] Presenile psychosis NOS                          | 4                 |
| ZS7C500   | Language disorder of dementia                        | 4                 |
| E02y100   | Drug-induced dementia                                | 4                 |
| 66h..00   | Dementia monitoring                                  | 4                 |
| R00z011   | [D]Memory deficit                                    | 3                 |
| e000.00   | Uncomplicated senile dementia                        | 3                 |
| Z7CEG00   | Transient memory loss                                | 3                 |
| Z7CF811   | Short-term memory loss                               | 3                 |
| E00..00   | Senile and presenile organic psychotic conditions    | 3                 |
| 2900      | SENILE DEMENTIA                                      | 3                 |
| Z7CF800   | Poor short-term memory                               | 3                 |
| Z7CEH15   | Poor memory                                          | 3                 |
| 2901A     | PRESENILE DEMENTIA                                   | 3                 |
| E00y.00   | Other senile and presenile organic psychoses         | 3                 |
| 3A30.00   | Memory: present place not knwn                       | 3                 |
| Z7CEH14   | Memory problem                                       | 3                 |
| 1B1A.12   | Memory loss symptom                                  | 3                 |
| 1B1A.00   | Memory loss - amnesia                                | 3                 |
| Z7CE611   | Memory loss                                          | 3                 |
| Z7CEJ00   | Memory lapses                                        | 3                 |
| Z7CEH00   | Memory impairment                                    | 3                 |
| 1B1A.13   | Memory disturbance                                   | 3                 |
| Z7CEC11   | Loss of memory for recent events                     | 3                 |
| Z7CE615   | Loss of memory                                       | 3                 |
| 1461.00   | H/O: dementia                                        | 3                 |
| 3AE6.00   | GDS level 7 - very severe cognitive decline          | 3                 |
| 3AE5.00   | GDS level 6 - severe cognitive decline               | 3                 |
| 3AE4.00   | GDS level 5 - moderately severe cognitive decline    | 3                 |
| 3AE3.00   | GDS level 4 - moderate cognitive decline             | 3                 |
| 3AE2.00   | GDS level 3 - mild cognitive decline                 | 3                 |
| 3AE1.00   | GDS level 2 - very mild cognitive decline            | 3                 |
| 2930      | DEMENTIA ARTERIOSCLEROTIC                            | 3                 |
| 299 G     | DEMENTIA AGGRESSIVE                                  | 3                 |

1  
2  
3  
4  
5  
6  
7  
8  
9  
10  
11  
12  
13  
14  
15  
16  
17  
18  
19  
20  
21  
22  
23  
24  
25  
26  
27  
28  
29  
30  
31  
32  
33  
34  
35  
36  
37  
38  
39  
40  
41  
42  
43  
44  
45  
46  
47  
48  
49  
50  
51  
52  
53  
54  
55  
56  
57  
58  
59  
60

| Read code | Description                                 | Number of studies |
|-----------|---------------------------------------------|-------------------|
| 299 B     | DEMENTIA                                    | 3                 |
| E012000   | Chronic alcoholic brain syndrome            | 3                 |
| 1B1A.11   | Amnesia symptom                             | 3                 |
| ZR1K.00   | Alzheimer's disease assessment scale        | 3                 |
| 2901B     | ALZHEIMER'S DISEASE                         | 3                 |
| ZR1K.11   | ADAS - Alzheimer's disease assessment scale | 3                 |
| Eu80200   | [X]Receptive language disorder              | 2                 |
| R00z000   | [D]Amnesia (retrograde)                     | 2                 |
| ZS78D00   | Wernicke's dysphasia                        | 2                 |
| ZS78D13   | Wernicke's aphasia                          | 2                 |
| Z7C3500   | Unable to use verbal reasoning              | 2                 |
| Z7C3200   | Unable to reason                            | 2                 |
| Z7C5100   | Unable to concentrate                       | 2                 |
| 1B1A000   | Temporary loss of memory                    | 2                 |
| Z7CEF00   | Temporary loss of memory                    | 2                 |
| Z7C5313   | Short concentration span                    | 2                 |
| Z7C5312   | Short attention span                        | 2                 |
| 1BR0.11   | Short attention span                        | 2                 |
| 8HTY.00   | Referral to memory clinic                   | 2                 |
| 8H1a.00   | Referral to dementia care advisor           | 2                 |
| Z7C5300   | Reduced concentration span                  | 2                 |
| 1BR..00   | Reduced concentration                       | 2                 |
| Z7C5311   | Reduced attention span                      | 2                 |
| E00y.11   | Presbyophrenic psychosis                    | 2                 |
| Z7CEB12   | Poor memory for remote events               | 2                 |
| Z7CFO00   | Poor long-term memory                       | 2                 |
| 1BW..00   | Poor concentration                          | 2                 |
| Z7CEC12   | No memory for recent events                 | 2                 |
| Z7CEK00   | Minor memory lapses                         | 2                 |
| Z7CEL00   | Mild memory disturbance                     | 2                 |
| E2A1000   | Mild memory disturbance                     | 2                 |
| 3A40.00   | Memory: present year not known              | 2                 |
| 3A20.00   | Memory: present time not known              | 2                 |
| 3A10.00   | Memory: own age not known                   | 2                 |
| 3A50.00   | Memory: own DOB not known                   | 2                 |
| 3A70.00   | Memory: important event not kn              | 2                 |
| 3A80.00   | Memory: import.person not knwn              | 2                 |
| 3A91.00   | Memory: count down unsuccess.               | 2                 |
| 3AA1.00   | Memory: address recall unsucc.              | 2                 |
| Z7A1500   | Memory retraining                           | 2                 |
| Z7CE412   | Memory loss symptom                         | 2                 |
| Z7CE614   | Memory loss - amnesia                       | 2                 |
| Z7CE413   | Memory loss - amnesia                       | 2                 |
| Z7CE612   | Memory gone                                 | 2                 |
| Z7CEH11   | Memory dysfunction                          | 2                 |
| Z7CE400   | Memory disturbance (& amnesia (& symptom))  | 2                 |
| Z7CE414   | Memory disturbance                          | 2                 |
| Z7CEH12   | Memory deficit                              | 2                 |
| Z7CFx00   | Memory aided by use of labels               | 2                 |
| Z7CE415   | Loss of memory                              | 2                 |
| Z7CFO11   | Long-term memory loss                       | 2                 |
| Z7C5111   | Lack of concentration                       | 2                 |
| Z7CE616   | LOM - Loss of memory                        | 2                 |

| Read code | Description                                                  | Number of studies |
|-----------|--------------------------------------------------------------|-------------------|
| 2901D     | JACOB- CREUZFELDT DISEASE WITH DEMENTIA                      | 2                 |
| Z7CEN11   | Invents experiences to compensate for loss of memory         | 2                 |
| Z7CEA11   | Impairment of working memory                                 | 2                 |
| Z7CEA13   | Impairment of primary memory                                 | 2                 |
| Z7C1.00   | Impaired cognition                                           | 2                 |
| 129B.00   | FH: Alzheimer's disease                                      | 2                 |
| Z7A1A00   | Executive functions training                                 | 2                 |
| 9hD0.00   | Excepted from dementia quality indicators: Patient unsuitabl | 2                 |
| 9hD1.00   | Excepted from dementia quality indicators: Informed dissent  | 2                 |
| 1S21.00   | Disturbance of memory for order of events                    | 2                 |
| Z7C3C00   | Difficulty using visuospatial reasoning                      | 2                 |
| Z7C3600   | Difficulty using verbal reasoning                            | 2                 |
| Z7C3300   | Difficulty reasoning                                         | 2                 |
| Z7C4A00   | Difficulty processing information at normal speed            | 2                 |
| Z7C4700   | Difficulty processing information accurately                 | 2                 |
| Z7C4300   | Difficulty processing information                            | 2                 |
| Z7C1100   | Difficulty making plans                                      | 2                 |
| ZR3V.13   | Dementia rating scale                                        | 2                 |
| 9Ou4.00   | Dementia monitoring verbal invite                            | 2                 |
| 9Ou3.00   | Dementia monitoring third letter                             | 2                 |
| 9Ou5.00   | Dementia monitoring telephone invite                         | 2                 |
| 9Ou2.00   | Dementia monitoring second letter                            | 2                 |
| 9Ou1.00   | Dementia monitoring first letter                             | 2                 |
| 3A...12   | Dementia assessment                                          | 2                 |
| Z7CGP00   | Delayed verbal memory                                        | 2                 |
| ZR3V.11   | DRS - Clinical dementia rating scale                         | 2                 |
| Y0601JS   | DEMENTIA CLINIC ATTENDANCE                                   | 2                 |
| Y060 JS   | DEMENTIA CLINIC                                              | 2                 |
| 2919      | DEMENTIA ALCOHOLIC                                           | 2                 |
| Z73..00   | Cognitive intervention strategies                            | 2                 |
| 28E..00   | Cognitive decline                                            | 2                 |
| ZR3V.00   | Clinical dementia rating scale                               | 2                 |
| ZR3V.12   | CDR - Clinical dementia rating scale                         | 2                 |
| Z7CEH13   | Bad memory                                                   | 2                 |
| ZR2X.12   | BDRS - Blessed dementia rating scale                         | 2                 |
| Z7A1400   | Attention training                                           | 2                 |
| Z7CE600   | Amnesia                                                      | 2                 |
| EU02y..0  |                                                              | 2                 |
| X0034     |                                                              | 2                 |
| AE..00    |                                                              | 2                 |
| Ryu5.00   | [X]Symptoms/signs inv cognit, percept, emotion state & behav | 1                 |
| Eu80000   | [X]Specific speech articulation disorder                     | 1                 |
| Eu81500   | [X]Severe learning disability                                | 1                 |
| Eu81700   | [X]Profound learning disability                              | 1                 |
| Ryu5000   | [X]Other amnesia                                             | 1                 |
| Ryu5100   | [X]Oth & unspec symptom/sign involv cognit funct/awareness   | 1                 |
| Eu81600   | [X]Mild learning disability                                  | 1                 |
| Eu05700   | [X]Mild cognitive disorder                                   | 1                 |
| Eu81z12   | [X]Learning disorder NOS                                     | 1                 |
| Eu81z11   | [X]Learning disability NOS                                   | 1                 |
| Eu81z13   | [X]Learn acquisition disab NOS                               | 1                 |
| Eu03.11   | [X]Korsakov's psychosis, nonalcoholic                        | 1                 |
| Eu10611   | [X]Korsakov's psychosis, alcohol induced                     | 1                 |

1  
2  
3  
4  
5  
6  
7  
8  
9  
10  
11  
12  
13  
14  
15  
16  
17  
18  
19  
20  
21  
22  
23  
24  
25  
26  
27  
28  
29  
30  
31  
32  
33  
34  
35  
36  
37  
38  
39  
40  
41  
42  
43  
44  
45  
46  
47  
48  
49  
50  
51  
52  
53  
54  
55  
56  
57  
58  
59  
60

| Read code | Description                                         | Number of studies |
|-----------|-----------------------------------------------------|-------------------|
| Eu80014   | [X]Functional speech articulation disorder          | 1                 |
| Eu80100   | [X]Expressive language disorder                     | 1                 |
| Eu90000   | [X]Disturbance of activity and attention            | 1                 |
| Eu44000   | [X]Dissociative amnesia                             | 1                 |
| Ryu5700   | [X]Disorientation, unspecified                      | 1                 |
| Eu10712   | [X]Chronic alcoholic brain syndrome                 | 1                 |
| Eu80600   | [X]Auditory processing disorder                     | 1                 |
| Eu90011   | [X]Attention deficit hyperactivity disorder         | 1                 |
| Eu9y700   | [X]Attention deficit disorder                       | 1                 |
| ZS91.12   | [X]Attention deficit disorder                       | 1                 |
| Eu04.12   | [X]Acute / subacute confusional state, nonalcoholic | 1                 |
| ZV40000   | [V]Problems with learning                           | 1                 |
| R045100   | [D]Dysphasia                                        | 1                 |
| R00zX00   | [D]Disorientation, unspecified                      | 1                 |
| R043.00   | [D]Aphasia                                          | 1                 |
| R00z500   | [D]Anterograde amnesia                              | 1                 |
| E011200   | Wernicke-Korsakov syndrome                          | 1                 |
| C253.00   | Wernicke's encephalopathy                           | 1                 |
| C251.11   | Wernicke's encephalopathy                           | 1                 |
| Z7CMB00   | Visuospatial agnosia                                | 1                 |
| Z7A1800   | Visual processing training                          | 1                 |
| F481J00   | Visual disorientation syndrome                      | 1                 |
| F584000   | Unspecified other abnormal auditory perception      | 1                 |
| Z7CH300   | Unrealistic planning                                | 1                 |
| Z7C7200   | Unable to write                                     | 1                 |
| ZT46200   | Unable to use verbal communication                  | 1                 |
| ZT49200   | Unable to use non-verbal communication              | 1                 |
| ZT47200   | Unable to use language                              | 1                 |
| Z7CI500   | Unable to use decision-making strategies            | 1                 |
| Z7C6200   | Unable to tell the time                             | 1                 |
| ZT4f200   | Unable to responds to communication by others       | 1                 |
| Z7C2600   | Unable to recognise surroundings                    | 1                 |
| Z7C2200   | Unable to recognise sounds                          | 1                 |
| Z7C2D00   | Unable to recognise parts of own body               | 1                 |
| Z7C2L11   | Unable to recognise objects visually                | 1                 |
| Z7C2L00   | Unable to recognise objects by sight                | 1                 |
| Z7C2H00   | Unable to recognise objects                         | 1                 |
| Z7C2T00   | Unable to recognise familiar people                 | 1                 |
| Z7C2R00   | Unable to recognise faces by sight                  | 1                 |
| Z7C2P00   | Unable to recognise faces                           | 1                 |
| Z7CFC00   | Unable to recall five digit number at five minutes  | 1                 |
| Z7C8200   | Unable to read                                      | 1                 |
| Z7C4900   | Unable to process information at normal speed       | 1                 |
| Z7C4600   | Unable to process information accurately            | 1                 |
| Z7C4200   | Unable to process information                       | 1                 |
| ZM18200   | Unable to plan meals                                | 1                 |
| Z7CH200   | Unable to plan                                      | 1                 |
| ZN28200   | Unable to organise a journey                        | 1                 |
| Z7CI900   | Unable to make considered choices                   | 1                 |
| Z7C4C00   | Unable to analyse information                       | 1                 |
| 1B1S.00   | Transient global amnesia                            | 1                 |
| Z7CE700   | Transient global amnesia                            | 1                 |
| ZS78600   | Transcortical sensory dysphasia                     | 1                 |

| Read code | Description                                                 | Number of studies |
|-----------|-------------------------------------------------------------|-------------------|
| ZS78411   | Transcortical motor aphasia                                 | 1                 |
| Z7CE711   | TGA - Transient global amnesia                              | 1                 |
| ZS78300   | Subcortical aphasia                                         | 1                 |
| E031.00   | Subacute confusional state                                  | 1                 |
| Z7A2200   | Strategy training for perceptual skills                     | 1                 |
| ZS5..00   | Speech and language dyspraxias                              | 1                 |
| ZS...00   | Speech and language disorder                                | 1                 |
| ZS73.00   | Specific language impairment                                | 1                 |
| ZS73.11   | Specific language disorder                                  | 1                 |
| Z7CC700   | Spatial disorientation                                      | 1                 |
| Z7CD400   | Slow learner                                                | 1                 |
| F483200   | Simultaneous visual perception without fusion               | 1                 |
| 1B1A100   | Short-term memory loss                                      | 1                 |
| 28E2.00   | Severe cognitive impairment                                 | 1                 |
| ZS78A00   | Semantic dysphasia                                          | 1                 |
| 9Nk1.00   | Seen in memory clinic                                       | 1                 |
| 9N0y.00   | Seen in learning disabilities clinic                        | 1                 |
| 342 CP    | SENILE PARKINSONISM                                         | 1                 |
| Z7CE900   | Retrograde amnesia                                          | 1                 |
| 8HHP.00   | Referral to learning disability team                        | 1                 |
| 8H4f.00   | Referral to learning disabilities psychiatrist              | 1                 |
| 1BR0.00   | Reduced concentration span                                  | 1                 |
| ZS72.00   | Receptive language impairment                               | 1                 |
| ZS78C00   | Receptive dysphasia                                         | 1                 |
| ZS78C11   | Receptive aphasia                                           | 1                 |
| Z7A1700   | Reality orientation                                         | 1                 |
| Z7A1711   | RO - Reality orientation                                    | 1                 |
| Z7CE911   | RA - Retrograde amnesia                                     | 1                 |
| ZRbf.00   | Psycholinguistic assessments of language process in aphasia | 1                 |
| ZD38300   | Promoting aphasics communication effectiveness programme    | 1                 |
| 8G96.00   | Problem solving therapy                                     | 1                 |
| ZS78F00   | Posterior dysphasia                                         | 1                 |
| 1B1Y.00   | Poor visual sequential memory                               | 1                 |
| 1B1a.00   | Poor auditory sequential memory                             | 1                 |
| F591z00   | Perceptive hearing loss NOS                                 | 1                 |
| F591.14   | Perceptive hearing loss                                     | 1                 |
| F591.13   | Perceptive deafness                                         | 1                 |
| Z7CL700   | Perception that things appear grey                          | 1                 |
| Z7CL800   | Perception that things appear flat                          | 1                 |
| Z7CLE00   | Perception of things changing size                          | 1                 |
| Z7CLH00   | Perception of things changing shape                         | 1                 |
| Z7CL911   | Perception of things changing colour                        | 1                 |
| E2F2.00   | Other specific learning difficulty                          | 1                 |
| F584z00   | Other abnormal auditory perception NOS                      | 1                 |
| F584.00   | Other abnormal auditory perception                          | 1                 |
| Z7A1600   | Orientation training                                        | 1                 |
| Z7CC312   | Orientation poor                                            | 1                 |
| Z7CC311   | Orientation confused                                        | 1                 |
| E2A1100   | Organic memory impairment                                   | 1                 |
| 918e.00   | On learning disability register                             | 1                 |
| 29J4.00   | O/E - sensory inattention                                   | 1                 |
| 2B46.11   | O/E - sensory dysphasia                                     | 1                 |
| 2B43.00   | O/E - sensory aphasia                                       | 1                 |

|    | Read code | Description                                             | Number of studies |
|----|-----------|---------------------------------------------------------|-------------------|
| 1  |           |                                                         |                   |
| 2  |           |                                                         |                   |
| 3  |           |                                                         |                   |
| 4  |           |                                                         |                   |
| 5  | 2BM3.11   | O/E - perceptive deafness                               | 1                 |
| 6  | 2B45.11   | O/E - motor dysphasia                                   | 1                 |
| 7  | 2B42.00   | O/E - motor aphasia                                     | 1                 |
| 8  | 2B46.00   | O/E - dysphasia - sensory                               | 1                 |
| 9  | 2B45.00   | O/E - dysphasia - motor                                 | 1                 |
| 10 | 2B47.00   | O/E - dysphasia - NOS                                   | 1                 |
| 11 | 2B4..12   | O/E - dysphasia                                         | 1                 |
| 12 | 2B44.00   | O/E - aphasia NOS                                       | 1                 |
| 13 | 2B4..11   | O/E - aphasia                                           | 1                 |
| 14 | ZS78I00   | Non-fluent dysphasia                                    | 1                 |
| 15 | ZS78I11   | Non-fluent aphasia                                      | 1                 |
| 16 | 28E1.00   | Moderate cognitive impairment                           | 1                 |
| 17 | ZS78200   | Mixed transcortical dysphasia                           | 1                 |
| 18 | ZS78900   | Mixed dysphasia                                         | 1                 |
| 19 | ZS78911   | Mixed aphasia                                           | 1                 |
| 20 | Z7C2700   | Mistakes people's identity                              | 1                 |
| 21 | 28E0.00   | Mild cognitive impairment                               | 1                 |
| 22 | 3A60.00   | Memory: present month not knwn                          | 1                 |
| 23 | 3A11.00   | Memory: own age known                                   | 1                 |
| 24 | Z7A1300   | Memory skills training                                  | 1                 |
| 25 | Z7CFz00   | Memory aided by use of lists                            | 1                 |
| 26 | Z7CFw00   | Memory aided by use of diary                            | 1                 |
| 27 | ZS34.11   | Learning disability                                     | 1                 |
| 28 | 9HB2.00   | Learning disabilities health action plan reviewed       | 1                 |
| 29 | 9HB1.00   | Learning disabilities health action plan offered        | 1                 |
| 30 | 9HB0.00   | Learning disabilities health action plan declined       | 1                 |
| 31 | 9HB4.00   | Learning disabilities health action plan completed      | 1                 |
| 32 | 9HB6.11   | Learning disabilities annual health check declined      | 1                 |
| 33 | 9HB6.00   | Learning disabilities annual health assessment declined | 1                 |
| 34 | 9HB5.00   | Learning disabilities annual health assessment          | 1                 |
| 35 | Z7CD200   | Learning difficulties                                   | 1                 |
| 36 | ZS3..00   | Language-related cognitive disorder                     | 1                 |
| 37 | ZS7..00   | Language impairment                                     | 1                 |
| 38 | ZS7C600   | Language disorder associated with thought disorder      | 1                 |
| 39 | 13ZA.00   | Language difficulty                                     | 1                 |
| 40 | E011100   | Korsakov's alcoholic psychosis with peripheral neuritis | 1                 |
| 41 | E011000   | Korsakov's alcoholic psychosis                          | 1                 |
| 42 | E040.11   | Korsakoff's non-alcoholic psychosis                     | 1                 |
| 43 | ZS78D12   | Jargon dysphasia                                        | 1                 |
| 44 | ZS78D11   | Jargon aphasia                                          | 1                 |
| 45 | A411.00   | Jakob-Creutzfeldt disease                               | 1                 |
| 46 | ZS78212   | Isolation dysphasia                                     | 1                 |
| 47 | Z7CEA12   | Impairment of immediate recall                          | 1                 |
| 48 | Z7CD300   | Impaired ability to learn new material                  | 1                 |
| 49 | E201700   | Hysterical amnesia                                      | 1                 |
| 50 | Z7CL100   | Heightened visual perception                            | 1                 |
| 51 | Z7CL511   | Heightened perception of touch                          | 1                 |
| 52 | Z7CLO00   | Heightened perception of taste                          | 1                 |
| 53 | Z7CLP11   | Heightened perception of sound                          | 1                 |
| 54 | Z7CLN11   | Heightened perception of smells                         | 1                 |
| 55 | Z7CLN12   | Heightened perception of odours                         | 1                 |
| 56 | Z7CLN00   | Heightened olfactory perception                         | 1                 |
| 57 | Z7CLP00   | Heightened auditory perception                          | 1                 |
| 58 |           |                                                         |                   |
| 59 |           |                                                         |                   |
| 60 |           |                                                         |                   |

| Read code | Description                                                  | Number of studies |
|-----------|--------------------------------------------------------------|-------------------|
| ZRLfE00   | Health of the Nation Outcome Scale item 4 - cognitive probl  | 1                 |
| Z7CF200   | Has delayed recall                                           | 1                 |
| ZS78800   | Global dysphasia                                             | 1                 |
| 3AE..00   | Global deterioration scale: assessment of prim deg dementia  | 1                 |
| ZS78811   | Global aphasia                                               | 1                 |
| Z7CE500   | Forgetful                                                    | 1                 |
| ZS78E11   | Fluent aphasia                                               | 1                 |
| 1281.00   | FH: Senile dementia                                          | 1                 |
| ZS71.00   | Expressive language impairment                               | 1                 |
| ZS84.00   | Expressive language disorder                                 | 1                 |
| ZS78G11   | Expressive aphasia                                           | 1                 |
| 9hD..00   | Exception reporting: dementia quality indicators             | 1                 |
| ZS78K00   | Efferent motor dysphasia                                     | 1                 |
| ZS78K11   | Efferent motor aphasia                                       | 1                 |
| ZS78.00   | Dysphasia                                                    | 1                 |
| ZT46400   | Does not use verbal communication                            | 1                 |
| ZT4J400   | Does not use the elements of language                        | 1                 |
| ZT49400   | Does not use non-verbal communication                        | 1                 |
| ZT4f400   | Does not respond to communication by others                  | 1                 |
| Z7C2900   | Does not recognise self                                      | 1                 |
| Z7C2A00   | Does not recognise photographs of self                       | 1                 |
| Z7CEM00   | Distortion of memory                                         | 1                 |
| Z7CC600   | Disorientation for person                                    | 1                 |
| Z7C7300   | Difficulty writing                                           | 1                 |
| ZT46500   | Difficulty using verbal communication                        | 1                 |
| ZT49500   | Difficulty using non-verbal communication                    | 1                 |
| Z7CI600   | Difficulty using decision-making strategies                  | 1                 |
| ZT4A500   | Difficulty using a non-speech system for communication       | 1                 |
| Z7CJ100   | Difficulty solving problems                                  | 1                 |
| Z7C8300   | Difficulty reading                                           | 1                 |
| ZM18500   | Difficulty planning meals                                    | 1                 |
| Z7C9300   | Difficulty performing logical sequencing                     | 1                 |
| ZN28500   | Difficulty organising a journey                              | 1                 |
| Z7CI200   | Difficulty making decisions                                  | 1                 |
| Z7CIA00   | Difficulty making considered choices                         | 1                 |
| ZT4g500   | Difficulty imitating forms of communication                  | 1                 |
| Z7C4D00   | Difficulty analysing information                             | 1                 |
| 9HB7.11   | Did not attend learning disabilities annual health check     | 1                 |
| 9HB7.00   | Did not attend learning disabilities annual health assessmnt | 1                 |
| 9Ou..00   | Dementia monitoring administration                           | 1                 |
| ZS93.11   | DAMP - Deficits in attention motor control and perception    | 1                 |
| ZS78B11   | Conduction aphasia                                           | 1                 |
| F591y00   | Combined perceptive hearing loss                             | 1                 |
| Z7A1.00   | Cognitive skills training                                    | 1                 |
| ZD15.00   | Cognitive neuropsychological language therapy                | 1                 |
| ZD38200   | Cognitive behavioural language therapy                       | 1                 |
| E2E0z00   | Child attention deficit disorder NOS                         | 1                 |
| E2E0.00   | Child attention deficit disorder                             | 1                 |
| Z7CLK00   | Changed perception of time                                   | 1                 |
| F11x700   | Cerebral degeneration due to Jakob - Creutzfeldt disease     | 1                 |
| ZS78H00   | Broca's dysphasia                                            | 1                 |
| ZS78H11   | Broca's aphasia                                              | 1                 |
| ZS76.00   | Auditory processing disorder                                 | 1                 |



1  
2  
3  
4  
5  
6  
7  
8  
9  
10  
11  
12  
13  
14  
15  
16  
17  
18  
19  
20  
21  
22  
23  
24  
25  
26  
27  
28  
29  
30  
31  
32  
33  
34  
35  
36  
37  
38  
39  
40  
41  
42  
43  
44  
45  
46  
47  
48  
49  
50  
51  
52  
53  
54  
55  
56  
57  
58  
59  
60

| Read code | Description                                | Number of studies |
|-----------|--------------------------------------------|-------------------|
| E2E0000   | Attention deficit without hyperactivity    | 1                 |
| ZS91.00   | Attention deficit disorder                 | 1                 |
| ZS78.11   | Aphasia                                    | 1                 |
| Z7CE811   | Antegrade amnesia                          | 1                 |
| ZS78511   | Anomic aphasia                             | 1                 |
| ZS78500   | Anomia                                     | 1                 |
| Z7CEB00   | Amnesia for remote events                  | 1                 |
| Z7CEC00   | Amnesia for recent events                  | 1                 |
| Z7CEE00   | Amnesia for important personal information | 1                 |
| Z7CED00   | Amnesia for day to day facts               | 1                 |
| 13Y7.00   | Alzheimer's disease society member         | 1                 |
| ZS7C.00   | Acquired language disorder                 | 1                 |
| ZS78100   | Acquired dysphasias                        | 1                 |
| 9OIA.00   | ADHD monitoring invitation third letter    | 1                 |
| 9OI8.00   | ADHD monitoring invitation first letter    | 1                 |
| ZS91.11   | ADD - Attention deficit disorder           | 1                 |
| Z7C2N00   |                                            | 1                 |
| E0120     |                                            | 1                 |
| 6AB.00    |                                            | 1                 |
| Z7C3800   |                                            | 1                 |
| Xa25J     |                                            | 1                 |
| Z7CEB11   |                                            | 1                 |
| Z7CC800   |                                            | 1                 |
| Z7C2J00   |                                            | 1                 |
| X00Rk     |                                            | 1                 |
| Z7C3B00   |                                            | 1                 |
| Z7A1100   |                                            | 1                 |
| Z7C6300   |                                            | 1                 |
| Z7C9200   |                                            | 1                 |
| Z7C3900   |                                            | 1                 |
| Z7C2F00   |                                            | 1                 |
| Z7C2B00   |                                            | 1                 |
| Z7A1712   |                                            | 1                 |
| Z7A2100   |                                            | 1                 |
| Z7A2300   |                                            | 1                 |

### Appendix 15. List of Read codes used in the studies of fatigue.

| Read code | Description                                               | Number of studies |
|-----------|-----------------------------------------------------------|-------------------|
| 168..00   | Tiredness symptom                                         | 3                 |
| 168..11   | Fatigue - symptom                                         | 3                 |
| 168..12   | Lethargy - symptom                                        | 3                 |
| 1682.00   | Fatigue                                                   | 3                 |
| 1683.00   | Tired all the time                                        | 3                 |
| 1684.11   | C/O - debility - malaise                                  | 3                 |
| 168Z.00   | Tiredness symptom NOS                                     | 3                 |
| 8HkW.00   | Referral to chronic fatigue syndrome specialist team      | 3                 |
| 8HIL.00   | Referral for chronic fatigue syndrome activity management | 3                 |
| 8Q1..00   | Activity management for chronic fatigue syndrome          | 3                 |
| E205.00   | Neurasthenia - nervous debility                           | 3                 |
| E205.12   | Tired all the time                                        | 3                 |
| Eu46011   | [X]Fatigue syndrome                                       | 3                 |
| F286.00   | Chronic fatigue syndrome                                  | 3                 |
| F286.11   | CFS - Chronic fatigue syndrome                            | 3                 |
| F286.12   | Postviral fatigue syndrome                                | 3                 |
| F286.13   | PVFS - Postviral fatigue syn                              | 3                 |
| F286.14   | Post-viral fatigue syndrome                               | 3                 |
| F286.15   | Myalgic encephalomyelitis                                 | 3                 |
| F286.16   | ME - Myalgic encephalomyelitis                            | 3                 |
| F286000   | Mild chronic fatigue syndrome                             | 3                 |
| F286100   | Moderate chronic fatigue syndrome                         | 3                 |
| F286200   | Severe chronic fatigue syndrome                           | 3                 |
| R007.00   | [D]Malaise and fatigue                                    | 3                 |
| R007100   | [D]Fatigue                                                | 3                 |
| R007211   | [D]General weakness                                       | 3                 |
| R007300   | [D]Lethargy                                               | 3                 |
| R007400   | [D]Postviral (asthenic) syndrome                          | 3                 |
| R007411   | [D]Post viral debility                                    | 3                 |
| R007500   | [D]Tiredness                                              | 3                 |
| R007z00   | [D]Malaise and fatigue NOS                                | 3                 |
| 168..13   | Malaise - symptom                                         | 2                 |
| 1683.11   | C/O - 'tired all the time'                                | 2                 |
| 1684.00   | Malaise/lethargy                                          | 2                 |
| 1684.13   | C/O - postviral syndrome                                  | 2                 |
| 1688.00   | Exhaustion                                                | 2                 |
| 1B3..12   | Weakness symptoms                                         | 2                 |
| E205.11   | Nervous exhaustion                                        | 2                 |
| Eu46000   | [X]Neurasthenia                                           | 2                 |
| F03y.12   | Myalgic encephalomyelitis                                 | 2                 |
| N239.00   | Fibromyalgia                                              | 2                 |
| N248.00   | Fibromyalgia                                              | 2                 |
| R007000   | [D]Malaise                                                | 2                 |
| R007200   | [D]Asthenia NOS                                           | 2                 |
| R2y3.00   | [D]Debility, unspecified                                  | 2                 |
| 168..14   | C/O 'Muzzy head'                                          | 1                 |
| 1B32.00   | Weakness present                                          | 1                 |
| 8HkW.11   | Referral to myalgic encephalomyelitis specialist team     | 1                 |
| 8Q1..11   | Activity management for myalgic encephalopathy            | 1                 |
| A4zy300   | Encephalitis lethargica                                   | 1                 |
| Eu46y14   | [X]Psychasthenia                                          | 1                 |

| Read code | Description                | Number of studies |
|-----------|----------------------------|-------------------|
| Eu46y15   | [X]Psychasthenia neurosis  | 1                 |
| R007600   | [D]Post polio exhaustion   | 1                 |
| R007z11   | [D]Lassitude               | 1                 |
| R202.00   | [D]Senile asthenia         | 1                 |
| SN44.00   | Exhaustion due to exposure | 1                 |

For peer review only

1  
2  
3 **Appendix 16. List of Read codes used in the studies of pain.**  
4

| Read code | Description                    | Number of studies |
|-----------|--------------------------------|-------------------|
| NyuAG     | [X]Uns sof tis d,use/overu/prs | 2                 |
| NyuA      | [X]Other soft tissue disorders | 2                 |
| Nyu80     | [X]Other myositis              | 2                 |
| Nyu3      | [X]Other joint disorders       | 2                 |
| Ryu70     | [X]Other chronic pain          | 2                 |
| NyuAF     | [X]Oth spcf soft tissu disords | 2                 |
| Nyu85     | [X]Oth spcf disorders/muscle   | 2                 |
| NyuAA     | [X]Oth sft tis diso/oth dis CE | 2                 |
| Nyu8A     | [X]Oth disorders/muscle/dis CE | 2                 |
| Nyu9      | [X]Disorders/synovium+tendon   | 2                 |
| Nyu8      | [X]Disorders of muscles        | 2                 |
| Nyu8B     | [X]Disorder of muscle, unspc   | 2                 |
| R01zz     | [D]Nerv/musculoskel.sympt.NOS  | 2                 |
| R01z      | [D]Nerv/musculoskel.symp.other | 2                 |
| R01       | [D]Musculoskeletal symptoms    | 2                 |
| R01z2     | [D]Musculoskeletal pain        | 2                 |
| R00z2     | [D]General aches and pains     | 2                 |
| N22z      | Synovium/tendon/bursa dis.NOS  | 2                 |
| N0950     | Stiff joint NEC-site unspc.    | 2                 |
| N0958     | Stiff joint NEC-other specif.  | 2                 |
| N240      | Rheumatism/fibrositis NOS      | 2                 |
| N2        | Rheumatism, excl.the back      | 2                 |
| N240z     | Rheumatism or fibrositis NOS   | 2                 |
| N2400     | Rheumatism NOS - shoulder      | 2                 |
| N2403     | Rheumatic pain                 | 2                 |
| N24z      | Polyalgia                      | 2                 |
| N09       | Other/unspcif.joint disorders  | 2                 |
| N22yz     | Other tendon disorder NOS      | 2                 |
| N233z     | Other specif.musc.disorder NOS | 2                 |
| N06yz     | Other specif.arthropathy NOS   | 2                 |
| N06y9     | Other spec.arthr.-multipl.site | 2                 |
| N09y      | Other spec. joint disorders    | 2                 |
| N24       | Other soft tissue disorders    | 2                 |
| N3z       | Other musculoskeletal dis. NOS | 2                 |
| N247      | Other musculoskel.limb sympts. | 2                 |
| N23y      | Other muscle/ligament/fascia   | 2                 |
| N23yz     | Other musc./lig./fasc.dis.NOS  | 2                 |
| N096z     | Other joint symptoms NOS       | 2                 |
| N0968     | Other joint sympt.-other spec. | 2                 |
| N0969     | Other joint sympt.-multip.site | 2                 |
| N09yz     | Other joint disorders NOS      | 2                 |
| N09y0     | Other joint dis.-site unspc.   | 2                 |
| N09y8     | Other joint dis.-other specif. | 2                 |
| N09y9     | Other joint dis.-multiple site | 2                 |
| N2y       | Nonarticular rheumatism OS     | 2                 |
| N2z       | Nonarticular rheumatism NOS    | 2                 |
| N39       | Nonallopathic lesions, NEC     | 2                 |
| N39z      | Nonallopathic lesion NEC NOS   | 2                 |
| N2411     | Myositis unspecified           | 2                 |
| N2480     | Myofascial pain syndrome       | 2                 |
| N241      | Myalgia/myositis unspecified   | 2                 |

1  
2  
3  
4  
5  
6  
7  
8  
9  
10  
11  
12  
13  
14  
15  
16  
17  
18  
19  
20  
21  
22  
23  
24  
25  
26  
27  
28  
29  
30  
31  
32  
33  
34  
35  
36  
37  
38  
39  
40  
41  
42  
43  
44  
45  
46  
47  
48  
49  
50  
51  
52  
53  
54  
55  
56  
57  
58  
59  
60

| Read code | Description                     | Number of studies |
|-----------|---------------------------------|-------------------|
| N241z     | Myalgia/myositis NOS            | 2                 |
| N3y       | Musculoskeletal disorders OS    | 2                 |
| Ny        | Musculoskeletal diseases OS     | 2                 |
| Nz        | Musculoskeletal diseases NOS    | 2                 |
| N2402     | Muscular rheumatism             | 2                 |
| N23z      | Muscle/ligament/fascia dis.NOS  | 2                 |
| N2410     | Muscle pain                     | 2                 |
| N0959     | Multiple joint stiffness        | 2                 |
| N0450     | Juv ankylosing spondylitis      | 2                 |
| N095z     | Joint stiffness NEC NOS         | 2                 |
| N095      | Joint stiffness NEC             | 2                 |
| N09zz     | Joint disorders NOS             | 2                 |
| N09z      | Joint disorder NOS              | 2                 |
| N09z0     | Joint disord.NOS-site unspecif  | 2                 |
| N09z8     | Joint disord.NOS-other specif.  | 2                 |
| N09z9     | Joint disord.NOS-multiple site  | 2                 |
| N096      | Joint crepitus                  | 2                 |
| N2401     | Fibrositis unspecified          | 2                 |
| N2412     | Fibromyositis NOS               | 2                 |
| N248      | Fibromyalgia                    | 2                 |
| N239      | Fibromyalgia                    | 2                 |
| N23       | Fascia disorders                | 2                 |
| N06zB     | Chronic arthritis               | 2                 |
| N06z0     | Arthropathy NOS-site unspecif.  | 2                 |
| N06z8     | Arthropathy NOS-other specif.   | 2                 |
| N06z9     | Arthropathy NOS-multiple sites  | 2                 |
| N06zz     | Arthropathy NOS                 | 2                 |
| N0z       | Arthropathies NOS               | 2                 |
| N06z      | Arthritis                       | 2                 |
| N0949     | Arthralgia of multiple joints   | 2                 |
| N094z     | Arthralgia NOS                  | 2                 |
| N0940     | Arthralgia - site unspecified   | 2                 |
| N0948     | Arthralgia - other specified    | 2                 |
| N094      | Ache in joint                   | 2                 |
| OX7179KB  | viral myalgia /ox               | 1                 |
| 7K6T1     | release of Torticollis          | 1                 |
| N2452     | neuropathic pain                | 1                 |
| OX7289CH  | back pain /ox                   | 1                 |
| Syu4E     | [X]Unspecif inj should/up arm   | 1                 |
| NyuB8     | [X]Unsp osteopor + pathol frac  | 1                 |
| Nyu28     | [X]Unilat second gonarthrosis   | 1                 |
| Nyu25     | [X]Unilat primary gonarthrosis  | 1                 |
| Nyu4      | [X]Systemc connctv tis disordrs | 1                 |
| Nyu4C     | [X]Sys diso/connctv t/o dis CE  | 1                 |
| Nyu95     | [X]Synovitis+tenosyn/bact d CE  | 1                 |
| Nyu97     | [X]Synovial hypertrophy, NEC    | 1                 |
| Ryu3      | [X]Sym/sign inv nv/muscskel sy  | 1                 |
| Syu12     | [X]Superf inj neck part unsp    | 1                 |
| Syu84     | [X]Sprn/str oth unsp part knee  | 1                 |
| Syu46     | [X]Spr/str oth/un part shl gir  | 1                 |
| Syu36     | [X]Spr/str ot/un pt lum sp/pel  | 1                 |
| Syu18     | [X]Spr/str jt/lg ot/un pt neck  | 1                 |
| Nyu92     | [X]Spontans ruptr/oth tendons   | 1                 |

| Read code | Description                    | Number of studies |
|-----------|--------------------------------|-------------------|
| Nyu68     | [X]Spondylpthy/oth diseases CE | 1                 |
| Nyu66     | [X]Spondylpth/o inf+paras d CE | 1                 |
| Nyu69     | [X]Spondylopathy unspecified   | 1                 |
| Nyu6      | [X]Spondylopathies             | 1                 |
| Nyu5B     | [X]Spin osteochondrosis, unsp  | 1                 |
| Nyu1G     | [X]Seroposit rheum arthr, unsp | 1                 |
| Nyu10     | [X]Rheum arthrit+inv/o org/sys | 1                 |
| Nyu05     | [X]Reactv arthropathy/o dis CE | 1                 |
| Eu45y     | [X]Psychogenic torticollis     | 1                 |
| NyuE4     | [X]Postproc muscsk disord,unsp | 1                 |
| Nyu2F     | [X]Post-traum arthr oth joints | 1                 |
| NyuC9     | [X]Periostitis/oth inf dis CE  | 1                 |
| Nyu51     | [X]Other+unspecified kyphosis  | 1                 |
| Nyu64     | [X]Other spondylosis           | 1                 |
| Nyu2D     | [X]Other specified arthrosis   | 1                 |
| Nyu1B     | [X]Other specified arthritis   | 1                 |
| Nyu65     | [X]Other spcfd spondylopathies | 1                 |
| Nyu3D     | [X]Other spcfd joint disorders | 1                 |
| NyuAB     | [X]Other shoulder lesions      | 1                 |
| Nyu54     | [X]Other secondary scoliosis   | 1                 |
| Nyu50     | [X]Other secondary kyphosis    | 1                 |
| Nyu17     | [X]Other secondary gout        | 1                 |
| Nyu21     | [X]Other primary coxarthrosis  | 1                 |
| Nyu20     | [X]Other polyarthrosis         | 1                 |
| Nyu46     | [X]Other overlap syndromes     | 1                 |
| NyuB1     | [X]Other osteoporosis          | 1                 |
| NyuC      | [X]Other osteopathies          | 1                 |
| NyuC5     | [X]Other osteonecrosis         | 1                 |
| NyuC3     | [X]Other osteomyelitis         | 1                 |
| Nyu82     | [X]Other ossification/muscle   | 1                 |
| Nyu37     | [X]Other meniscus derangements | 1                 |
| Nyu52     | [X]Other lordosis              | 1                 |
| Nyu15     | [X]Other juvenile arthritis    | 1                 |
| Nyu3C     | [X]Other instability of joint  | 1                 |
| NyuA4     | [X]Other infective bursitis    | 1                 |
| Nyu53     | [X]Other idiopathic scoliosis  | 1                 |
| Nyu41     | [X]Other giant cell arteritis  | 1                 |
| Nyu56     | [X]Other fusion of spine       | 1                 |
| Nyu55     | [X]Other forms of scoliosis    | 1                 |
| NyuAE     | [X]Other enthesopathies,NEC    | 1                 |
| Nyu7      | [X]Other dorsopathies          | 1                 |
| Nyu7A     | [X]Other dorsalgia             | 1                 |
| Nyu36     | [X]Other disorders of patella  | 1                 |
| Nyu44     | [X]Other dermatomyositis       | 1                 |
| Nyu35     | [X]Other derangements/patella  | 1                 |
| NyuB6     | [X]Other cyst of bone          | 1                 |
| NyuC2     | [X]Other chronic osteomyelitis | 1                 |
| Nyu18     | [X]Other chondrocalcinosis     | 1                 |
| Nyu81     | [X]Other calcification/muscle  | 1                 |
| NyuA1     | [X]Other bursitis of knee      | 1                 |
| NyuA6     | [X]Other bursitis NEC          | 1                 |
| NyuA5     | [X]Other bursal cyst           | 1                 |
| NyuA7     | [X]Other bursa disorder        | 1                 |

1  
2  
3  
4  
5  
6  
7  
8  
9  
10  
11  
12  
13  
14  
15  
16  
17  
18  
19  
20  
21  
22  
23  
24  
25  
26  
27  
28  
29  
30  
31  
32  
33  
34  
35  
36  
37  
38  
39  
40  
41  
42  
43  
44  
45  
46  
47  
48  
49  
50  
51  
52  
53  
54  
55  
56  
57  
58  
59  
60

| Read code | Description                    | Number of studies |
|-----------|--------------------------------|-------------------|
| NyuE3     | [X]Other biomechanical lesions | 1                 |
| NyuB4     | [X]Other adult osteomalacia    | 1                 |
| NyuC0     | [X]Other acute osteomyelitis   | 1                 |
| NyuC4     | [X]Other 2ndary osteonecrosis  | 1                 |
| Nyu47     | [X]Oth syst dis/connctv tissue | 1                 |
| Nyu91     | [X]Oth synovitis+tenosynovitis | 1                 |
| Syu40     | [X]Oth sup inj should/upp arm  | 1                 |
| Nyu62     | [X]Oth spondylosis+myelopathy  | 1                 |
| Nyu79     | [X]Oth specified dorsopathies  | 1                 |
| NyuC8     | [X]Oth spcfd disorders of bone | 1                 |
| Nyu1A     | [X]Oth spcfc arthropathies,NEC | 1                 |
| Nyu12     | [X]Oth spcf rheumatd arthritis | 1                 |
| Nyu61     | [X]Oth spcf inflam spondylpath | 1                 |
| NyuD4     | [X]Oth spcf disordrs/cartilage | 1                 |
| Nyu59     | [X]Oth spcf deform dorsopath   | 1                 |
| NyuD3     | [X]Oth spc osteochondropathies | 1                 |
| Syu3K     | [X]Oth sp inj abd/low back/pel | 1                 |
| Nyu2E     | [X]Oth secondary coxarthrosis  | 1                 |
| Nyu83     | [X]Oth ruptr/muscl(nontraumtc) | 1                 |
| Nyu58     | [X]Oth recur vertebrl subluxtn | 1                 |
| Nyu03     | [X]Oth reactive arthropathies  | 1                 |
| Nyu13     | [X]Oth psoriatic arthropathies | 1                 |
| Nyu26     | [X]Oth post-traum gonarthrosis | 1                 |
| Nyu23     | [X]Oth post-traum coxarthrosis | 1                 |
| NyuB0     | [X]Oth osteoporosis+patholog # | 1                 |
| Nyu39     | [X]Oth intrnl derangemnts/knee | 1                 |
| Nyu90     | [X]Oth infectve(teno)synovitis | 1                 |
| Nyu60     | [X]Oth infectv spondylopathies | 1                 |
| Nyu45     | [X]Oth forms/systemc sclerosis | 1                 |
| Nyu43     | [X]Oth forms/sys lup erythemat | 1                 |
| NyuA9     | [X]Oth fibroblastic disorders  | 1                 |
| Nyu22     | [X]Oth dysplastic coxarthrosis | 1                 |
| NyuB5     | [X]Oth diso/continuity of bone | 1                 |
| NyuC6     | [X]Oth diso/bone dvlpmnt+grwth | 1                 |
| NyuE      | [X]Oth dis musculnsk+connect   | 1                 |
| Nyu70     | [X]Oth cervicl disc displacmnt | 1                 |
| Nyu71     | [X]Oth cervicl disc degeneratn | 1                 |
| Nyu72     | [X]Oth cervical disc disorders | 1                 |
| Nyu3A     | [X]Oth articlur cartilag disor | 1                 |
| Nyu27     | [X]Oth 2ndry gonarthrsis,bilat | 1                 |
| Nyu24     | [X]Oth 2ndry coxarthrsis,bilat | 1                 |
| NyuB2     | [X]Osteoporosis/oth disords CE | 1                 |
| NyuBC     | [X]Osteopenia                  | 1                 |
| NyuCA     | [X]Osteopathy/other inf dis CE | 1                 |
| NyuCF     | [X]Osteopathy/oth diseases CE  | 1                 |
| NyuCC     | [X]Osteonecrosis/other dis CE  | 1                 |
| NyuCB     | [X]Osteonecros/h'moglobnph CE  | 1                 |
| NyuCD     | [X]Osteitis defrmn/neop dis CE | 1                 |
| SR1z1     | [X]Op multiple fractures unsp  | 1                 |
| Nyu00     | [X]O strep arthritis+polyarthr | 1                 |
| Nyu38     | [X]O spontn disrptn/lig(s)knee | 1                 |
| Nyu63     | [X]O spondylosis+radiculopathy | 1                 |
| NyuD2     | [X]O spf juvnl osteochondrosis | 1                 |

| Read code | Description                        | Number of studies |
|-----------|------------------------------------|-------------------|
| Nyu42     | [X]O spcf necrotiz vasculopath     | 1                 |
| Nyu3B     | [X]O spcf joint derangmnts,NEC     | 1                 |
| Nyu77     | [X]O spcf intrvtrbrl disc diso     | 1                 |
| Nyu94     | [X]O spcf diso/synovium+tendon     | 1                 |
| Nyu19     | [X]O spcf crystl arthropathies     | 1                 |
| Nyu76     | [X]O spc intrvtrbrl disc degenr    | 1                 |
| Nyu75     | [X]O spc intervert disc displm     | 1                 |
| NyuB7     | [X]O spc diso/bne dnsity+struc     | 1                 |
| NyuE0     | [X]O spc acq defrm/muscskl sys     | 1                 |
| NyuA3     | [X]O sft t d rl/use,overu+prss     | 1                 |
| Nyu11     | [X]O sero+ve rheumat arthritis     | 1                 |
| Nyu57     | [X]O recur atlantoaxl subluxt n    | 1                 |
| NyuE2     | [X]O postproced muscskel disor     | 1                 |
| Nyu04     | [X]O postinf arthropath/dis CE     | 1                 |
| NyuC7     | [X]O hypertrophc osteoarhrpth      | 1                 |
| Nyu14     | [X]O enteropathic arthrpathies     | 1                 |
| NyuB3     | [X]O drug-indc osteomalac/adlt     | 1                 |
| Nyu96     | [X]O diso/synovm+tendon/dis CE     | 1                 |
| Nyu93     | [X]O contractre/tendon(sheath)     | 1                 |
| Nyu40     | [X]O cond relt/polyarterit nod     | 1                 |
| NyuC1     | [X]O chr h'matogens osteomyelit    | 1                 |
| Nyu4D     | [X]Necrotis vasculopathy, unsp     | 1                 |
| Nyu87     | [X]Myosits/protzl+paras inf CE     | 1                 |
| Nyu88     | [X]Myositis/oth infects dis CE     | 1                 |
| Nyu89     | [X]Myositis in sarcoidosis CE      | 1                 |
| Nyu86     | [X]Myositi/bacterial dis CE        | 1                 |
| Nyu84     | [X]Muscle wasting and atrophy NEC  | 1                 |
| SyuA4     | [X]Multi disloc/spr/strns,unsp     | 1                 |
| Nyu4F     | [X]Mixed connective tissue disease | 1                 |
| Nyu74     | [X]Lumb+o intvt disc d+radiclp     | 1                 |
| Nyu73     | [X]Lumb+o intrvrt disc d+mylop     | 1                 |
| Nyu5A     | [X]Lordosis, unspecified           | 1                 |
| Nyu16     | [X]Juvenile arthritis/o dis CE     | 1                 |
| Syu1      | [X]Injuries to the neck            | 1                 |
| Syu3      | [X]Injabd/low back/lum sp/pel      | 1                 |
| Syu4      | [X]Inj to shoulder/upper arm       | 1                 |
| Syu8      | [X]Inj to knee and lower leg       | 1                 |
| Nyu1      | [X]Inflammatory polyarthropathies  | 1                 |
| Nyu0      | [X]Infectious arthropathies        | 1                 |
| Nyu1C     | [X]Gt arthpth/enz d+o inh d CE     | 1                 |
| Syu16     | [X]Fracture other parts neck       | 1                 |
| Syu44     | [X]Fract should/upp arm unsp       | 1                 |
| Syu15     | [X]Fract oth spec cervic vert      | 1                 |
| SyuA2     | [X]Fract inv oth comb bod regn     | 1                 |
| NyuAH     | [X]Fibroblastic disord, unspec     | 1                 |
| NyuA8     | [X]Fasciitis,NEC                   | 1                 |
| NyuBB     | [X]Erosion of bone                 | 1                 |
| SyuA3     | [X]Dsl/spr/str,oth comb bod rg     | 1                 |
| SyuB3     | [X]Dsl/sp/st un jt/l leg,lv un     | 1                 |
| NyuB      | [X]Disordrs/bone dens+structur     | 1                 |
| Nyu3E     | [X]Disorder of patella, unspec     | 1                 |
| NyuDE     | [X]Disorder cartilage, unspec      | 1                 |
| NyuBA     | [X]Disord bone dens/struc,unsp     | 1                 |



1  
2  
3  
4  
5  
6  
7  
8  
9  
10  
11  
12  
13  
14  
15  
16  
17  
18  
19  
20  
21  
22  
23  
24  
25  
26  
27  
28  
29  
30  
31  
32  
33  
34  
35  
36  
37  
38  
39  
40  
41  
42  
43  
44  
45  
46  
47  
48  
49  
50  
51  
52  
53  
54  
55  
56  
57  
58  
59  
60

| Read code              | Description                         | Number of studies |
|------------------------|-------------------------------------|-------------------|
| Syu17                  | [X]Disloc oth unsp parts neck       | 1                 |
| SyuBC                  | [X]Disl/spr/str unsp body reg       | 1                 |
| Nyu4E                  | [X]Dermatopolymyositis, unspec      | 1                 |
| Nyu48                  | [X]Dermat(poly)myosit/neo d CE      | 1                 |
| Nyu5                   | [X]Deforming dorsopathies           | 1                 |
| Nyu1D                  | [X]Crys arthpht/o meta diso,CE      | 1                 |
| Nyu67                  | [X]Collapsd vertebra in dis CE      | 1                 |
| SR1z0                  | [X]Clsd multiple fractis unspec     | 1                 |
| NyuD                   | [X]Chondropathies                   | 1                 |
| Nyu7B                  | [X]Cervical disc disord, unsp       | 1                 |
| Nyu4B                  | [X]Arthrpthy/hyprsens react CE      | 1                 |
| Nyu1F                  | [X]Arthrpth/o spcf diseases CE      | 1                 |
| Nyu1E                  | [X]Arthrpth/o en,nut+meta diso      | 1                 |
| Nyu2                   | [X]Arthrosis                        | 1                 |
| Nyu4A                  | [X]Arthropathy/o bld disord CE      | 1                 |
| Nyu49                  | [X]Arthropathy/neoplast dis CE      | 1                 |
| Nyu02                  | [X]Arthrits/o inf+paras dis CE      | 1                 |
| Nyu01                  | [X]Arthrit+polyarth/o s bact a      | 1                 |
| NyuB9                  | [X]Adult osteomalacia, unspec       | 1                 |
| Nyu                    | [X]Ad muscskl+con t dis cls tm      | 1                 |
| NyuCE                  | [X]#bone/neoplastic disease CE      | 1                 |
| NyuE1                  | [X]#/bne f insrt/o i,j pr,bn p      | 1                 |
| EMISREQ 7N945(9)       | [SO]Lumbosacral joint -Req.         | 1                 |
| HNGZ018                | [RFC] Arthritis                     | 1                 |
| R0420                  | [D]Swelling in head or neck         | 1                 |
| R042                   | [D]Swell.masslump head/neck         | 1                 |
| R027                   | [D]Spontaneous bruising             | 1                 |
| R065A                  | [D]Musculoskeletal chest pain       | 1                 |
| R137                   | [D]Musculoskel.ray/scan abnorm      | 1                 |
| R137z                  | [D]Musculosc xray/scan abn NOS      | 1                 |
| R022C                  | [D]Lump on knee                     | 1                 |
| R04zz                  | [D]Head and neck symptoms NOS       | 1                 |
| R04                    | [D]Head and neck symptoms           | 1                 |
| R04z                   | [D]Head and neck other sympt.       | 1                 |
| R00z2-1                | [D]General aches and pains          | 1                 |
| R065000                | [D]CHEST PAIN, UNSPECIFIED          | 1                 |
| R065z00                | [D]CHEST PAIN NOS                   | 1                 |
| R065.00                | [D]CHEST PAIN                       | 1                 |
| R090z00                | [D]Abdominal pain                   | 1                 |
| R090.00                | [D]Abdominal pain                   | 1                 |
| DEGRADE_EVENT_1730_49  | [DEGRADE Muscle Injury]             | 1                 |
| DEGRADE_EVENT_2469_340 | [DEGRADE Knee Pain]                 | 1                 |
| DEGRADE_EVENT_3154_40  | [DEGRADE Knee Pain]                 | 1                 |
| N135z-2                | Wry neck                            | 1                 |
| N05z3                  | Wrist osteoarthritis NOS            | 1                 |
| N0943-1                | Wrist joint pain                    | 1                 |
| N06z3-1                | Wrist arthritis NOS                 | 1                 |
| S5704                  | Whiplash injury                     | 1                 |
| EGTONWE2               | Wedge Compression # Of Dorsal Spine | 1                 |
| EGTONWE1               | Wedge Compression # Lumbar Spine    | 1                 |
| N2432                  | Weber - Christian disease           | 1                 |
| N2430                  | Weber - Christian disease           | 1                 |
| N0974                  | Walking difficulty-other spec.      | 1                 |

| Read code | Description                                | Number of studies |
|-----------|--------------------------------------------|-------------------|
| N0975     | Walking difficulty-multip.site             | 1                 |
| N0970     | Walking difficulty due to unspecified site | 1                 |
| N2413     | Viral myalgia                              | 1                 |
| N092M     | Villonodular synovitis of knee             | 1                 |
| N092z     | Villonodular synovitis NOS                 | 1                 |
| N092      | Villonodular synovitis                     | 1                 |
| N0920     | Villonod.synovitis-site unspec             | 1                 |
| N0921     | Villonod.synovitis-shoulder                | 1                 |
| N0928     | Villonod.synovitis-other spec.             | 1                 |
| N0929     | Villonod.synovitis-mult.sites              | 1                 |
| N2208     | Villonod synovitis-tend sheath             | 1                 |
| N092B     | Villonod synovitis-sternclav j             | 1                 |
| N092A     | Villonod synovitis-shoulder                | 1                 |
| N092C     | Villonod synovitis-acromclav j             | 1                 |
| N330B     | Vertebral osteoporosis                     | 1                 |
| N320      | Vertebral epiphysitis                      | 1                 |
| N1        | Vertebral column syndromes                 | 1                 |
| N1y       | Vertebral column disorders OS              | 1                 |
| N1z       | Vertebral column disorder NOS              | 1                 |
| N0966-2   | Unstable knee                              | 1                 |
| N0967-1   | Unstable ankle                             | 1                 |
| N066z     | Unspecified monoarthritis NOS              | 1                 |
| N066      | Unspecified monoarthritis                  | 1                 |
| N1290     | Unspec.disc disorder+myelop.               | 1                 |
| N0650     | Unsp.polyarthr.-site unspecif.             | 1                 |
| N065000   | Unsp.polyarthr.-site unspecif.             | 1                 |
| N0651     | Unsp.polyarthr.-shoulder                   | 1                 |
| N065800   | Unsp.polyarthr.-other specif.              | 1                 |
| N0658     | Unsp.polyarthr.-other specif.              | 1                 |
| N065900   | Unsp.polyarthr.-multiple site              | 1                 |
| N0659     | Unsp.polyarthr.-multiple site              | 1                 |
| N3020     | Unsp.osteomyelitis-site unspec             | 1                 |
| N3021     | Unsp.osteomyelitis-shoulder                | 1                 |
| N3028     | Unsp.osteomyelitis-other spec.             | 1                 |
| N3029     | Unsp.osteomyelitis-mult.site               | 1                 |
| N302z     | Unsp.osteomyelitis NOS                     | 1                 |
| N0660     | Unsp.monoarthr.-site unspecif.             | 1                 |
| N0661     | Unsp.monoarthr.-shoulder                   | 1                 |
| N0668     | Unsp.monoarthr.-other specif.              | 1                 |
| N1121     | Two lev th spondyl-no myelop               | 1                 |
| N11B1     | Two lev th spondyl + radiculop             | 1                 |
| N1131     | Two lev th spondyl + myelop                | 1                 |
| N1141     | Two lev lumbsac spond-no myelo             | 1                 |
| N1151     | Two lev lumbsac spond + myelop             | 1                 |
| N1101     | Two lev Cx spondyl-no myelop               | 1                 |
| N1191     | Two lev Cx spondyl + radiculop             | 1                 |
| N1111     | Two lev Cx spondyl + myelop                | 1                 |
| N018      | Tuberculous arthritis                      | 1                 |
| N3041     | Tuberculosis of thoracic spine             | 1                 |
| N304      | Tuberculosis of spine                      | 1                 |
| N306      | Tuberculosis of other bones                | 1                 |
| N3042     | Tuberculosis of lumbar spine               | 1                 |
| N3040     | Tuberculosis of cervical spine             | 1                 |

1  
2  
3  
4  
5  
6  
7  
8  
9  
10  
11  
12  
13  
14  
15  
16  
17  
18  
19  
20  
21  
22  
23  
24  
25  
26  
27  
28  
29  
30  
31  
32  
33  
34  
35  
36  
37  
38  
39  
40  
41  
42  
43  
44  
45  
46  
47  
48  
49  
50  
51  
52  
53  
54  
55  
56  
57  
58  
59  
60

| Read code | Description                     | Number of studies |
|-----------|---------------------------------|-------------------|
| N3060     | Tuberculosis bone-site unspec.  | 1                 |
| N3061     | Tuberculosis bone-shoulder      | 1                 |
| N3064     | Tuberculosis bone-other sites   | 1                 |
| N3065     | Tuberculosis bone-multip.sites  | 1                 |
| N306z     | Tuberculosis bone NOS           | 1                 |
| N22yD     | Tuberc infec - tendon sheath    | 1                 |
| N2155     | Trochanteric tendinitis         | 1                 |
| N2157     | Trochanteric bursitis           | 1                 |
| N0874     | Triangular fibrocartilage tear  | 1                 |
| N0875     | Triangular fibrocartil detach   | 1                 |
| N118      | Traumatic spondylopathy         | 1                 |
| N2312     | Traumatic myositis ossificans   | 1                 |
| SE46      | Traumatic haematoma             | 1                 |
| SK        | Traumatic complicat./unsp.inj.  | 1                 |
| N061A     | Traumatic arthropathy-shoulder  | 1                 |
| N061M     | Traumatic arthropathy-knee      | 1                 |
| N061z     | Traumatic arthropathy NOS       | 1                 |
| N061      | Traumatic arthropathy           | 1                 |
| N0610     | Traumatic arthr.-site unspecif  | 1                 |
| N0611     | Traumatic arthr.-shoulder       | 1                 |
| N0618     | Traumatic arthr.-other specif.  | 1                 |
| N0619     | Traumatic arthr.-multiple site  | 1                 |
| N061B     | Traumat arthrop-sternoclav jt   | 1                 |
| N061C     | Traumat arthrop-acromioclav jt  | 1                 |
| S906      | Traumat amp at shoulder joint   | 1                 |
| SA72      | Traum.unil.amput.>knee-no comp  | 1                 |
| N220Q     | Transient synovitis             | 1                 |
| N064A     | Transient arthropathy-shoulder  | 1                 |
| N064M     | Transient arthropathy-knee      | 1                 |
| N064z     | Transient arthropathy NOS       | 1                 |
| N064      | Transient arthropathy           | 1                 |
| N064B     | Transient arthrop-sternoclav j  | 1                 |
| N0640     | Transient arthr.-site unspecif  | 1                 |
| N0641     | Transient arthr.-shoulder       | 1                 |
| N0648     | Transient arthr.-other specif.  | 1                 |
| N0649     | Transient arthr.-multiple site  | 1                 |
| N064C     | Transient arthr-acromioclav jt  | 1                 |
| N135      | Torticollis unspecified         | 1                 |
| Q20y9     | Torticollis due to birth injury | 1                 |
| 16A3      | Torticollis - symptom           | 1                 |
| N2451-1   | Toe pain                        | 1                 |
| N2162     | Tibial collateral lig.bursitis  | 1                 |
| N2450-1   | Thumb pain                      | 1                 |
| N05z4-2   | Thumb osteoarthritis NOS        | 1                 |
| N3735     | Thoracogenic scoliosis          | 1                 |
| N1485     | Thoraco-lumbar ankylosis        | 1                 |
| N144      | Thoracic/lumbosacral neuritis   | 1                 |
| N144z     | Thoracic/lumbosac.neuritis NOS  | 1                 |
| N112-1    | Thoracic spondylosis            | 1                 |
| N112      | Thoracic spond.-no myelopathy   | 1                 |
| N113      | Thoracic spond.+ myelopathy     | 1                 |
| N148B     | Thoracic spine instability      | 1                 |
| N1484     | Thoracic spine ankylosis        | 1                 |

| Read code  | Description                        | Number of studies |
|------------|------------------------------------|-------------------|
| N1401      | Thoracic spinal stenosis           | 1                 |
| N12A2      | Thoracic postlaminectomy syndr     | 1                 |
| N1440      | Thoracic nerve root pain           | 1                 |
| N12z8      | Thoracic discitis                  | 1                 |
| N121       | Thoracic disc displ.-no myelop     | 1                 |
| N1292      | Thoracic disc disord.+myelop.      | 1                 |
| N126       | Thoracic disc degeneration         | 1                 |
| S571       | Thoracic back sprain               | 1                 |
| EMISNQTH14 | Thoracic back pain                 | 1                 |
| N245-8     | Thigh pain                         | 1                 |
| N11B       | Th spondyl + radiculop             | 1                 |
| N1406      | Th spin stenosis due to oth dis    | 1                 |
| N12C1      | Th disc prolapse+radiculopathy     | 1                 |
| N12B1      | Th disc prolapse + myelopathy      | 1                 |
| N2132-1    | Tennis elbow                       | 1                 |
| N2202      | Tendon sheath giant cell tumor     | 1                 |
| ASDFGTE2   | Tendon Symptoms                    | 1                 |
| N2456      | Tender heel pad                    | 1                 |
| S46B       | Tear/articular cart/knee,currnt    | 1                 |
| S545       | Tear of ligament of knee joint     | 1                 |
| N000*      | Systemic lupus erythematosus       | 1                 |
| N000       | Systemic lupus erythematosus       | 1                 |
| N000z      | Systemic lupus erythematos.NOS     | 1                 |
| N0012      | Syst scleros induc drugs/chems     | 1                 |
| N0003      | Syst lup eryth + organ/sys inv     | 1                 |
| N2227      | Syphilitic bursitis                | 1                 |
| N2200      | Synovitis or tenosynovitis NOS     | 1                 |
| N220z-2    | Synovitis of knee                  | 1                 |
| N220z      | Synovitis of knee                  | 1                 |
| N220V      | Synovitis of knee                  | 1                 |
| N220       | Synovitis and tenosynovitis        | 1                 |
| N220T      | Synovitis NOS                      | 1                 |
| N2201      | Synovit./tenosynovitis+dis EC      | 1                 |
| N22y4      | Synovial plica                     | 1                 |
| N098       | Synovial osteochondromatosis       | 1                 |
| N2240      | Synovial cyst unspecified          | 1                 |
| N0980      | Synov osteochondromat-shoulder     | 1                 |
| N098B      | Synov osteochondromat-knee         | 1                 |
| N0981      | Synov osteochondromat st-cla j     | 1                 |
| N0982      | Synov osteochondromat ac-cla j     | 1                 |
| 1D24       | Symptom: trunk posterior           | 1                 |
| 16J4       | Swollen knee                       | 1                 |
| 16J3       | Swollen joint                      | 1                 |
| 16J7       | Swollen foot                       | 1                 |
| 1834-1     | Swollen finger                     | 1                 |
| 1JG        | Suspected inflammatory arthritis   | 1                 |
| N21z2      | Supraspinatus tendonitis           | 1                 |
| N2113      | Supraspinatus tendinitis           | 1                 |
| N230       | Suppurative myositis               | 1                 |
| SD1y4      | Supl inj bk NOS-no mj opn wnd      | 1                 |
| SD9        | Superficialinjuriesunspecif.       | 1                 |
| SD097      | SuperficialInjury:Neck             | 1                 |
| SD2y1      | Superficial injury of scapular NOS | 1                 |

1  
2  
3  
4  
5  
6  
7  
8  
9  
10  
11  
12  
13  
14  
15  
16  
17  
18  
19  
20  
21  
22  
23  
24  
25  
26  
27  
28  
29  
30  
31  
32  
33  
34  
35  
36  
37  
38  
39  
40  
41  
42  
43  
44  
45  
46  
47  
48  
49  
50  
51  
52  
53  
54  
55  
56  
57  
58  
59  
60

| Read code | Description                       | Number of studies |
|-----------|-----------------------------------|-------------------|
| SD6y2     | Superficial injury of knee NOS    | 1                 |
| SDz       | Superficial injuries NOS          | 1                 |
| SD0       | Superficial Injury: Neck          | 1                 |
| SD2y0     | Superfic injury shoulder NOS      | 1                 |
| SD2       | Superf.inj.shoulder/upper arm     | 1                 |
| SD1z4     | Superf.back inj.NOS+infect.       | 1                 |
| N3371     | Sudek's atrophy                   | 1                 |
| N2167     | Subpatellar bursitis              | 1                 |
| N3y01     | Subluxatn complex (vertebral)     | 1                 |
| N3y02     | Sublux stenosis of neural canal   | 1                 |
| N3081     | Subacute osteomyelitis-th spin    | 1                 |
| N3082     | Subacute osteomyelitis-lu spin    | 1                 |
| N3080     | Subacute osteomyelitis-Cx spin    | 1                 |
| N309      | Subacute osteomyelitis            | 1                 |
| N308      | Subacute osteomyelitis            | 1                 |
| N2122     | Subacromial impingement           | 1                 |
| N2116     | Subacromial bursitis              | 1                 |
| S3z2      | Stress fracture                   | 1                 |
| N095B     | Stiff sternoclavic joint NEC      | 1                 |
| N095A     | Stiff shoulder NEC                | 1                 |
| 16AZ      | Stiff neck symptom NOS            | 1                 |
| 16A       | Stiff neck symptom                | 1                 |
| N135z     | Stiff neck NOS                    | 1                 |
| 16A2      | Stiff neck                        | 1                 |
| N095M     | Stiff knee NEC                    | 1                 |
| N095C     | Stiff acromioclavicular joint NEC | 1                 |
| S5y41     | Sternoclavicular sprain           | 1                 |
| N0108     | Staphylococc arthrit/polyarthr    | 1                 |
| S5410     | Sprn,knee jt,medial collat        | 1                 |
| S5400     | Sprn,knee jt,lat collat lgmt      | 1                 |
| S520D     | Sprn triangular fibrocartilage    | 1                 |
| S520G     | Sprn shrt intrnsc lgmnt non-sp    | 1                 |
| S5        | Sprains and strains               | 1                 |
| S50       | Sprained shoulder                 | 1                 |
| S54y-99   | Sprained knee NOS                 | 1                 |
| S54-99    | Sprained knee                     | 1                 |
| S560      | Sprain, lumbosacral ligament      | 1                 |
| S564      | Sprain, iliolumbar ligament       | 1                 |
| S501      | Sprain, coraco-clav ligament      | 1                 |
| S506      | Sprain supraspinatus tendon       | 1                 |
| S505      | Sprain subscapularis tendon       | 1                 |
| S5071     | Sprain shoulder joint posterior   | 1                 |
| S5070     | Sprain shoulder joint anterior    | 1                 |
| S507      | Sprain shoulder joint             | 1                 |
| S534      | Sprain patellar tendon            | 1                 |
| S503      | Sprain infraspinatus tendon       | 1                 |
| S500      | Sprain acromio-clav ligament      | 1                 |
| S542      | Sprain -cruciate knee ligament    | 1                 |
| S541      | Sprain - medial knee ligament     | 1                 |
| S541-99   | Sprain - medial knee ligament     | 1                 |
| S540-99   | Sprain - lateral knee ligament    | 1                 |
| S540      | Sprain - lateral knee ligament    | 1                 |
| SC07      | Sprain - late effect              | 1                 |

| Read code | Description                    | Number of studies |
|-----------|--------------------------------|-------------------|
| S57X      | Spr/str ot/un pt lum sp/pel    | 1                 |
| ASDFGSP5  | Sports Injury                  | 1                 |
| N082      | Spontaneous joint dislocation  | 1                 |
| 16B3      | Spontaneous bruising           | 1                 |
| N11z0     | Spondylosis-no myelopathy,NOS  | 1                 |
| N11zz     | Spondylosis NOS                | 1                 |
| N11z1     | Spondylosis + myelopathy, NOS  | 1                 |
| N388      | Spondylolysis                  | 1                 |
| OXL7561C  | Spondylolisthesis /ox          | 1                 |
| N10z      | Spondylitis NOS                | 1                 |
| N374      | Spine curvature+other condits. | 1                 |
| N374z     | Spine curvature+other cond.NOS | 1                 |
| N1400     | Spinal stenosis unspec.region  | 1                 |
| N140z     | Spinal stenosis NOS            | 1                 |
| N140-1    | Spinal stenosis                | 1                 |
| N140      | Spinal stenosis                | 1                 |
| N101      | Spinal enthesopathy            | 1                 |
| N222z     | Specific bursitides NOS        | 1                 |
| N222      | Specific bursitides            | 1                 |
| F1382     | Spasmodic Torticollis          | 1                 |
| N23y4     | Spasm of muscle                | 1                 |
| N23yE     | Spasm of back muscles          | 1                 |
| EGTON309  | Sore Neck                      | 1                 |
| N3321     | Solitary bone cyst             | 1                 |
| N0878     | Snapping shoulder              | 1                 |
| N32y      | Slipped radial epiphysis       | 1                 |
| N33zA     | Skeletal fluorosis             | 1                 |
| N002*     | Sicca (Sjogren's) syndrome     | 1                 |
| N2125     | Shoulder tendonitis            | 1                 |
| S50y      | Shoulder sprain NOS            | 1                 |
| N245-7    | Shoulder pain                  | 1                 |
| N245      | Shoulder pain                  | 1                 |
| N2457     | Shoulder pain                  | 1                 |
| N0951     | Shoulder joint stiffness       | 1                 |
| UNMAPPC0  | Shoulder injury                | 1                 |
| S221      | Shoulder fracture - open       | 1                 |
| N22y5     | Short tendon                   | 1                 |
| N011      | Sex acquired reactive arthrop  | 1                 |
| N0110     | Sex acqd reac arthrop-unspec   | 1                 |
| N0111     | Sex acqd reac arthrop-shoulder | 1                 |
| N011y     | Sex acqd reac arthrop-oth spec | 1                 |
| N011x     | Sex acqd reac arthrop-multiple | 1                 |
| N011z     | Sex acq reac arthropathy NOS   | 1                 |
| SRz0      | Severe multiple injuries       | 1                 |
| N047      | Seropositive erosive RA        | 1                 |
| N04X      | Seroposit rheum arthr unsp     | 1                 |
| N040P     | Seronegative rheumat arthritis | 1                 |
| EGTONSE2  | Sero-Negative Polyarthritis    | 1                 |
| N04y1     | Sero negative arthritis        | 1                 |
| N04y10    | Sero negative arthritis        | 1                 |
| N3301     | Senile osteoporosis            | 1                 |
| N2169     | Semimembranosus tendinitis     | 1                 |
| EGTON131  | Semi Frozen Shoulder           | 1                 |

1  
2  
3  
4  
5  
6  
7  
8  
9  
10  
11  
12  
13  
14  
15  
16  
17  
18  
19  
20  
21  
22  
23  
24  
25  
26  
27  
28  
29  
30  
31  
32  
33  
34  
35  
36  
37  
38  
39  
40  
41  
42  
43  
44  
45  
46  
47  
48  
49  
50  
51  
52  
53  
54  
55  
56  
57  
58  
59  
60

| Read code  | Description                    | Number of studies |
|------------|--------------------------------|-------------------|
| N3y00      | Segmental & somatic dysfunctn  | 1                 |
| N0505      | Secondary multiple arthrosis   | 1                 |
| N050500    | Secondary multiple arthrosis   | 1                 |
| EMISNQSC20 | Scoliosis of thoracic spine    | 1                 |
| N374A      | Scoliosis in skelet dysplasia  | 1                 |
| N374C      | Scoliosis in neurofibromatosis | 1                 |
| N374D      | Scoliosis in conn tiss anomal  | 1                 |
| N3739      | Scoliosis due to oth treatment | 1                 |
| OX735AA    | Scoliosis Acquired /ox         | 1                 |
| N3743      | Scoliosis + other condition    | 1                 |
| N001       | Scleroderma                    | 1                 |
| OX353C     | Sciatica Chronic /ox           | 1                 |
| N1240      | Schmorl's nodes-unspec. region | 1                 |
| N1241      | Schmorl's nodes-thoracic regn. | 1                 |
| N124z      | Schmorl's nodes-region NOS     | 1                 |
| N1242      | Schmorl's nodes-lumbar region  | 1                 |
| N124       | Schmorl's nodes                | 1                 |
| N3201      | Scheuermann's disease          | 1                 |
| N2121      | Scapulohumeral fibrositis      | 1                 |
| N146z-1    | Sacroiliac strain              | 1                 |
| N1466      | Sacroiliac disorder            | 1                 |
| S5731      | Sacral/coccyx sprain           | 1                 |
| N0004      | SLE with pericarditis          | 1                 |
| N25        | SAPHO syndrome                 | 1                 |
| S5Q2       | Rupture supraspinatus tendon   | 1                 |
| S5Q1       | Rupture subscapularis tendon   | 1                 |
| S5U2       | Rupture patellar tendon        | 1                 |
| N2250      | Rupture of synovium unspecif.  | 1                 |
| N225z      | Rupture of synovium NOS        | 1                 |
| N2251-99   | Rupture of synovium - knee     | 1                 |
| N225       | Rupture of synovium            | 1                 |
| S5Q0       | Rupture infraspinal tendon     | 1                 |
| N2251      | Ruptur poplit space synov cyst | 1                 |
| N2110      | Rotator cuff syndrome unspecif | 1                 |
| S504       | Rotator cuff sprain            | 1                 |
| N211       | Rotator cuff shoulder syndrome | 1                 |
| N2261      | Rotator cuff complete rupture  | 1                 |
| N3385      | Rotational mal-union of #      | 1                 |
| 182B       | Rib pain                       | 1                 |
| EGTON425   | Rheumatology                   | 1                 |
| N040N      | Rheumatoid vasculitis          | 1                 |
| N0422      | Rheumatoid nodule              | 1                 |
| N040R      | Rheumatoid nodule              | 1                 |
| N0421      | Rheumatoid lung disease        | 1                 |
| N040Q      | Rheumatoid bursitis            | 1                 |
| N0402      | Rheumatoid arthritis-shoulder  | 1                 |
| N0400      | Rheumatoid arthritis-Cx spine  | 1                 |
| N040D      | Rheumatoid arthritis of knee   | 1                 |
| N040       | Rheumatoid arthritis           | 1                 |
| N0403      | Rheumatoid arthr-sternoclav jt | 1                 |
| N0404      | Rheumatoid arthr-acromioclav j | 1                 |
| N1351      | Rheumatic torticollis          | 1                 |
| N0420      | Rheumatic carditis             | 1                 |

| Read code | Description                      | Number of studies |
|-----------|----------------------------------|-------------------|
| OX7149A   | Rheumatic Arthritis /ox          | 1                 |
| N040S     | Rheumat arthr - multiple joint   | 1                 |
| N2333     | Rhabdomyolysis                   | 1                 |
| N042z     | Rh.arthr.+visc/syst.dis.NOS      | 1                 |
| N080A     | Reverse Hill-Sachs lesion        | 1                 |
| N0871     | Reverse Bankart lesion           | 1                 |
| N12zA     | Resorption of thoracic disc      | 1                 |
| N12zE     | Resorption of lumbar disc        | 1                 |
| N12z6     | Resorption of cervical disc      | 1                 |
| N3732     | Resolving infant.idiopath.scol   | 1                 |
| N246      | Residual soft tiss.foreign bod   | 1                 |
| N339      | Residual foreign body in bone    | 1                 |
| Ny2       | Repetitive strain injury         | 1                 |
| N33z5     | Relapsing polychondritis         | 1                 |
| N337      | Reflex sympathetic dystrophy     | 1                 |
| N083      | Redislocation of joint           | 1                 |
| S46D      | Recurrent subluxation of patella | 1                 |
| N083D     | Recurrent sublux shoulder-post   | 1                 |
| N083F     | Recurrent sublux shoulder-inf    | 1                 |
| N083C     | Recurrent sublux shoulder-ant    | 1                 |
| N083H     | Recurrent sublux shoulder-ant    | 1                 |
| N083q     | Recurrent sublux - patella       | 1                 |
| N083z     | Recurrent joint dislocat.NOS     | 1                 |
| N0839     | Recurrent disloc-multip joints   | 1                 |
| N083B     | Recurrent disloc shoulder-post   | 1                 |
| N083E     | Recurrent disloc shoulder-inf    | 1                 |
| N083A     | Recurrent disloc shoulder-ant    | 1                 |
| N083G     | Recurrent disloc shoulder-ant    | 1                 |
| N083p     | Recurrent disloc - patella       | 1                 |
| N083n     | Recurrent disloc - knee          | 1                 |
| N0830     | Recurr.joint disloc.-site unsp   | 1                 |
| N0838     | Recurr.joint disloc-other spec   | 1                 |
| N0831     | Recur. disloc.- shoulder joint   | 1                 |
| N0836-99  | Recur. disloc. - knee joint      | 1                 |
| N083K     | Recur sublux shoulder-multidir   | 1                 |
| N083J     | Recur disloc shoulder-multidir   | 1                 |
| N1y0      | Rec atlantoax subl + myelopath   | 1                 |
| N01w0     | Reactive arthropathy-shoulder    | 1                 |
| N01w      | Reactive arthropathy unspecified | 1                 |
| N01wB     | Reactive arthropathy of knee     | 1                 |
| N038      | Reactive arthropathies           | 1                 |
| N01w2     | Reactive arthrop-sternoclav jt   | 1                 |
| N01w1     | Reactive arthr-acromioclav jt    | 1                 |
| EGTON436  | Radiculopathy                    | 1                 |
| N2422     | Radiculitis unspecified          | 1                 |
| N3734     | Radiation scoliosis              | 1                 |
| N3711     | Radiation kyphosis               | 1                 |
| N0706     | Radial tear of medial meniscus   | 1                 |
| N0717     | Radial tear of lateral meniscus  | 1                 |
| N2204     | Radial styloid tenosynovitis     | 1                 |
| N22yC     | Pyogenic infec - tendon sheath   | 1                 |
| N010      | Pyogenic arthritis               | 1                 |
| N0100     | Pyogenic arthr.-site unspecif.   | 1                 |



1  
2  
3  
4  
5  
6  
7  
8  
9  
10  
11  
12  
13  
14  
15  
16  
17  
18  
19  
20  
21  
22  
23  
24  
25  
26  
27  
28  
29  
30  
31  
32  
33  
34  
35  
36  
37  
38  
39  
40  
41  
42  
43  
44  
45  
46  
47  
48  
49  
50  
51  
52  
53  
54  
55  
56  
57  
58  
59  
60

| Read code | Description                                                         | Number of studies |
|-----------|---------------------------------------------------------------------|-------------------|
| N0101     | Pyogenic arthr.-shoulder regn.                                      | 1                 |
| N010y     | Pyogenic arthr.-other specif.                                       | 1                 |
| N010x     | Pyogenic arthr.-multiple sites                                      | 1                 |
| N010z     | Pyogenic arthr.-NOS                                                 | 1                 |
| S57z0     | Pulled back muscle                                                  | 1                 |
| OX848ML   | Pulled Muscle /ox                                                   | 1                 |
| E2601     | Psychogenic Torticollis                                             | 1                 |
| N2373     | Pseudosarcomatous fibromatosis                                      | 1                 |
| N33zC     | Pseudarth after fusr/arthrodes                                      | 1                 |
| S5422     | Prt tr,knee,post cruciate lgmt                                      | 1                 |
| N12C4     | Prol lumb interv disc sciatic                                       | 1                 |
| N0010     | Progressive systemic sclerosis                                      | 1                 |
| N2311     | Progressive myositis ossific.                                       | 1                 |
| N3733     | Progressive infant.idiop.scol.                                      | 1                 |
| N051B     | Primary gonarthrosis, bilat                                         | 1                 |
| N050400   | Primary general osteoarthritis                                      | 1                 |
| N0504     | Primary general osteoarthritis                                      | 1                 |
| N0519     | Primary coxarthrosis bilateral                                      | 1                 |
| N051C     | Primary arthrosis of first carpometacarpal joints, bilateral        | 1                 |
| N2165     | Prepatellar bursitis                                                | 1                 |
| N3736     | Postural scoliosis                                                  | 1                 |
| N3307     | Postsurg malabsorp osteoporos                                       | 1                 |
| N3314     | Postsur malab osteop+path frct                                      | 1                 |
| NyX       | Postproc muscsk disord,unsp                                         | 1                 |
| N2313     | Postop.heterotopic calcificat.                                      | 1                 |
| N3306     | Postoophorectomy osteoporosis                                       | 1                 |
| N3312     | Postoophorc osteopor+path frct                                      | 1                 |
| N3302     | Postmenopausal osteoporosis                                         | 1                 |
| N331B     | Postmenop osteopor+path fract                                       | 1                 |
| N0380     | Postmeningococcal arthritis                                         | 1                 |
| N12Az     | Postlaminectomy syndrome NOS                                        | 1                 |
| N12A      | Postlaminectomy syndrome                                            | 1                 |
| N12A0     | Postlaminectomy syndr.unspec.                                       | 1                 |
| N0381     | Postinf arthropath in syphilis                                      | 1                 |
| N037      | Postimmunization arthropathy                                        | 1                 |
| N013      | Postdysenteric react arthrop                                        | 1                 |
| N0130     | Postdys react arthrop-unspec                                        | 1                 |
| N0131     | Postdys react arthrop-shoulder                                      | 1                 |
| N013y     | Postdys react arthrop-oth spec                                      | 1                 |
| N013x     | Postdys react arthrop-multiple                                      | 1                 |
| N013z     | Postdys react arthrop NOS                                           | 1                 |
| 16B4      | Post-traumatic bruising                                             | 1                 |
| N052B     | Post-traumatic arthrosis of first carpometacarpal joints, bilateral | 1                 |
| N052C     | Post-trauma gonarth, unilat                                         | 1                 |
| N052A     | Post-traum gonarthrosis, bilat                                      | 1                 |
| N0529     | Post-traum coxarthrosis, bilat                                      | 1                 |
| N3738     | Post-surgical scoliosis                                             | 1                 |
| N3721     | Post-laminectomy lordosis                                           | 1                 |
| N3712     | Post-laminectomy kyphosis                                           | 1                 |
| N2314     | Polymyositis ossificans                                             | 1                 |
| N004      | Polymyositis                                                        | 1                 |

| Read code | Description                    | Number of studies |
|-----------|--------------------------------|-------------------|
| N20*      | Polymyalgia rheumatica         | 1                 |
| N20       | Polymyalgia                    | 1                 |
| N065-1    | Polyarthropathy NEC            | 1                 |
| N065.11   | Polyarthropathy NEC            | 1                 |
| N065      | Polyarthropathy NEC            | 1                 |
| N065z     | Polyarthritis                  | 1                 |
| N065z00   | Polyarthritis                  | 1                 |
| N307z     | Poliomyelitis osteopathy NOS   | 1                 |
| N3070     | Polio.osteopathy-site unspecif | 1                 |
| N3071     | Polio.osteopathy-shoulder      | 1                 |
| N3078     | Polio.osteopathy-other sites   | 1                 |
| N3079     | Polio.osteopathy-multiple site | 1                 |
| N0109     | Pneumococc arthrit & polyarthr | 1                 |
| N2179     | Plantar fasciitis              | 1                 |
| N2209     | Plant thorn synovitis          | 1                 |
| N2161     | Pes anserinus tendin./bursitis | 1                 |
| SJz-98    | Peripheral nerve injury NOS    | 1                 |
| N21zz     | Peripheral enthesopathy NOS    | 1                 |
| N21       | Peripheral enthesopathies      | 1                 |
| N0705     | Periph detach-medial meniscus  | 1                 |
| N0716     | Periph detach-lateral meniscus | 1                 |
| N303      | Periostitis, no osteomyelitis  | 1                 |
| N303B     | Periostitis, no osteomye-th sp | 1                 |
| N303C     | Periostitis, no osteomye-lu sp | 1                 |
| N303A     | Periostitis, no osteomye-Cx sp | 1                 |
| N303z     | Periostitis no osteomyel NOS   | 1                 |
| N3030     | Periostitis - site unspecified | 1                 |
| N3031     | Periostitis - shoulder         | 1                 |
| N3038     | Periostitis - other sites      | 1                 |
| N3039     | Periostitis - multiple sites   | 1                 |
| N2120     | Periarthritis of shoulder      | 1                 |
| N21z1     | Periarthritis NOS              | 1                 |
| N3843     | Pedicular spondylolisthesis    | 1                 |
| N0432     | Pauciarticular juvenile R.A.   | 1                 |
| N0456     | Pauciartic onset juv ch arth   | 1                 |
| N331y     | Pathological fracture OS       | 1                 |
| N331z     | Pathological fracture NOS      | 1                 |
| N082z     | Pathological dislocation NOS   | 1                 |
| N331C     | Pathological # cervical vert   | 1                 |
| N0820     | Patholog.disloc.-site unspecif | 1                 |
| N0821     | Patholog.disloc.-shoulder      | 1                 |
| N0828     | Patholog.disloc.-other specif. | 1                 |
| N082A     | Path disloc-shoulder joint     | 1                 |
| N082R     | Path disloc-patellofem joint   | 1                 |
| N082B     | Path disloc-oth joint-shoulder | 1                 |
| N0829     | Path disloc-multiple joints    | 1                 |
| N082Q     | Path disloc-knee joint         | 1                 |
| N0536-1   | Patellofemoral osteoarthritis  | 1                 |
| N0536     | Patellofemoral osteoarthritis  | 1                 |
| N07y6     | Patellofemoral maltracking     | 1                 |
| N09A      | Patellofemoral disorder        | 1                 |
| N2266     | Patellar tendon nontraum.rupt. | 1                 |
| N2164     | Patellar tendinitis            | 1                 |

1  
2  
3  
4  
5  
6  
7  
8  
9  
10  
11  
12  
13  
14  
15  
16  
17  
18  
19  
20  
21  
22  
23  
24  
25  
26  
27  
28  
29  
30  
31  
32  
33  
34  
35  
36  
37  
38  
39  
40  
41  
42  
43  
44  
45  
46  
47  
48  
49  
50  
51  
52  
53  
54  
55  
56  
57  
58  
59  
60

| Read code | Description                    | Number of studies |
|-----------|--------------------------------|-------------------|
| N33z9     | Partial epiphyseal arrest      | 1                 |
| S5421     | Part tr,knee,ant cruciate lgmt | 1                 |
| N2114     | Part thickn rotator cuff tear  | 1                 |
| S5411     | Part tear,knee,mdl collat lgmt | 1                 |
| S5401     | Part tear,knee,lat collat lgmt | 1                 |
| N1y2      | Pars interarticular strss frct | 1                 |
| N0704     | Parr beak tear-post/med menisc | 1                 |
| N0715     | Parr beak tear-post/lat menisc | 1                 |
| N2316     | Paralytic calcific/ossif muscl | 1                 |
| N243      | Panniculitis unspecified       | 1                 |
| N136      | Panniculitis of neck           | 1                 |
| N243z     | Panniculitis NOS               | 1                 |
| N093z     | Palindromic rheumatism NOS     | 1                 |
| N093      | Palindromic rheumatism         | 1                 |
| N0930     | Palindromic rheum.-site unspec | 1                 |
| N0931     | Palindromic rheum.-shoulder    | 1                 |
| N0938     | Palindromic rheum.-other spec. | 1                 |
| N0939     | Palindromic rheum.-multip.site | 1                 |
| N211z     | Painful arc syndrome           | 1                 |
| N211z-1   | Painful arc syndrome           | 1                 |
| EGTON224  | Painful Shoulder               | 1                 |
| EGTON279  | Painful Right Knee             | 1                 |
| N131-1    | Pain in cervical spine         | 1                 |
| N245-9    | Pain in buttock                | 1                 |
| N2453     | Pain in arm                    | 1                 |
| OX7280AD  | Pain Neck /ox                  | 1                 |
| OX7873E   | Pain Knee /ox                  | 1                 |
| N245-95   | Pain In Right Leg              | 1                 |
| N245-97   | Pain In Right Arm              | 1                 |
| N245-96   | Pain In Left Leg               | 1                 |
| N3101     | Paget's disease-thoracic spine | 1                 |
| N3106     | Paget's disease-scapula        | 1                 |
| N310F     | Paget's disease-patella        | 1                 |
| N310x     | Paget's disease-multiple sites | 1                 |
| N3102     | Paget's disease-lumbar spine   | 1                 |
| N3105     | Paget's disease-clavicle       | 1                 |
| N3100     | Paget's disease-cervical spine | 1                 |
| N310y     | Paget's disease OS             | 1                 |
| N310z     | Paget's disease NOS            | 1                 |
| N122-1    | PID - prolapsed lumbar disc    | 1                 |
| N129      | PID - prol i/v disc + myelop   | 1                 |
| S102y     | Othr spec clsd # thorac vert   | 1                 |
| S411y     | Othr opn trmtc disloctn shlder | 1                 |
| S410y     | Othr cls trmtc disloc shoulder | 1                 |
| SK12z     | Othershould/upperarminj.NOS    | 1                 |
| SE08      | Othercontusionneck             | 1                 |
| N06..00   | Other/unspecif. arthropathies  | 1                 |
| N12z2     | Other thoracic disc disorders  | 1                 |
| N22       | Other synovium/tendon/bursa    | 1                 |
| N22y      | Other synovium/tendon/bursa    | 1                 |
| N096B     | Other symptoms - sternoclav jt | 1                 |
| N096A     | Other symptoms - shoulder      | 1                 |
| N096M     | Other symptoms - knee          | 1                 |

| Read code | Description                                                 | Number of studies |
|-----------|-------------------------------------------------------------|-------------------|
| N096D     | Other symptoms - elbow                                      | 1                 |
| N096C     | Other symptoms - acromioclav j                              | 1                 |
| SD9y      | Other superficial injury, without mention of infection, NOS | 1                 |
| S5y       | Other sprains and strains                                   | 1                 |
| S5yz      | Other sprains NOS                                           | 1                 |
| N11y      | Other spondyloses/allied dis.                               | 1                 |
| S5W       | Other specified tendon rupture                              | 1                 |
| S54w      | Other specified knee sprain                                 | 1                 |
| SK1       | Other specified injury                                      | 1                 |
| N06y      | Other specified arthropathy                                 | 1                 |
| N233      | Other specific muscle disorder                              | 1                 |
| N04y      | Other specif.infl.polyarthrop.                              | 1                 |
| N32yz     | Other spec.osteochondrop.NOS                                | 1                 |
| N04yz     | Other spec.infl.polyarthr.NOS                               | 1                 |
| N00y      | Other spec.diff.collagen dis.                               | 1                 |
| N06y0     | Other spec.arthr.-site unspec.                              | 1                 |
| N06y1     | Other spec.arthr.-shoulder                                  | 1                 |
| N06y8     | Other spec.arthr.-other specif                              | 1                 |
| S5yy      | Other spec sprains and strains                              | 1                 |
| S50w      | Other shoulder sprain                                       | 1                 |
| SK122     | Other shoulder injuries                                     | 1                 |
| N212      | Other shoulder affections NEC                               | 1                 |
| N212z     | Other shoulder affect.NEC NOS                               | 1                 |
| SK121     | Other scapular region injuries                              | 1                 |
| N042      | Other rh.arthr.+visc/syst.dis.                              | 1                 |
| N3722     | Other post-surgical lordosis                                | 1                 |
| N21y      | Other periph. enthesopathies                                | 1                 |
| N3272     | Other osteochondr dissec-knee                               | 1                 |
| S466      | Other opn trm dscltn knee                                   | 1                 |
| S497      | Other open trmtc dislocation                                | 1                 |
| S49Fz     | Other open subluxation NOS                                  | 1                 |
| S4J3      | Other open #-subluxation                                    | 1                 |
| S4J1      | Other open #-dislocation                                    | 1                 |
| N226z     | Other nontraumatic tendon rupt                              | 1                 |
| SK10y     | Other neck injuries                                         | 1                 |
| SK1x      | Other multiple injuries                                     | 1                 |
| N12z3     | Other lumbar disc disorders                                 | 1                 |
| N07yy     | Other knee lig. old disruption                              | 1                 |
| SK170     | Other knee injury                                           | 1                 |
| N368      | Other knee deformity                                        | 1                 |
| N045      | Other juvenile arthritis                                    | 1                 |
| N326      | Other juven.osteochondroses                                 | 1                 |
| N0960     | Other joint sympt.-site unspec                              | 1                 |
| N0961     | Other joint sympt.-shoulder                                 | 1                 |
| N09y1     | Other joint dis.-shoulder                                   | 1                 |
| N08yz     | Other joint derange.NEC NOS                                 | 1                 |
| SK112     | Other interscapular injuries                                | 1                 |
| N07yz     | Other intern.knee derang.NOS                                | 1                 |
| SK1z      | Other injury NOS                                            | 1                 |
| N10y      | Other inflamm.spondylopathies                               | 1                 |
| N10yz     | Other inflamm.spondylop.NOS                                 | 1                 |
| N30y      | Other infections+bone disease                               | 1                 |

1  
2  
3  
4  
5  
6  
7  
8  
9  
10  
11  
12  
13  
14  
15  
16  
17  
18  
19  
20  
21  
22  
23  
24  
25  
26  
27  
28  
29  
30  
31  
32  
33  
34  
35  
36  
37  
38  
39  
40  
41  
42  
43  
44  
45  
46  
47  
48  
49  
50  
51  
52  
53  
54  
55  
56  
57  
58  
59  
60

| Read code | Description                         | Number of studies |
|-----------|-------------------------------------|-------------------|
| N03x      | Other general dis.+arthropathy      | 1                 |
| N237z     | Other fibromatoses NOS              | 1                 |
| N237      | Other fibromatoses                  | 1                 |
| SK10z     | Other face and neck injuries NOS    | 1                 |
| S49z      | Other dislocation NOS               | 1                 |
| N12z0     | Other disc disorders unspecif.      | 1                 |
| N08       | Other derangement of joint          | 1                 |
| N36y      | Other deformity of bone             | 1                 |
| N37y      | Other curvatures of spine           | 1                 |
| N02yz     | Other crystal arthropathy NOS       | 1                 |
| N02y      | Other crystal arthropathies         | 1                 |
| N02y0     | Other crystal arth.-site unsp.      | 1                 |
| N02y1     | Other crystal arth.-shoulder        | 1                 |
| N02yy     | Other crystal arth.-other spec      | 1                 |
| N02yx     | Other crystal arth.-mult.sites      | 1                 |
| S465      | Other cls trm dslctn knee           | 1                 |
| S49E      | Other closed traumatic sublux       | 1                 |
| S4J2      | Other closed #-sublux               | 1                 |
| S4J0      | Other closed #-dislocation          | 1                 |
| N13yz     | Other cervical syndromes NOS        | 1                 |
| N13y      | Other cervical syndromes            | 1                 |
| N12z1     | Other cervical disc disorders       | 1                 |
| N33       | Other bone/cartilage disorders      | 1                 |
| N31y      | Other bone involve.in dis.EC        | 1                 |
| SK114     | Other back injuries                 | 1                 |
| N374X     | Other and unspecified kyphosis      | 1                 |
| N06       | Other and unspecified arthropathies | 1                 |
| S462      | Other acute meniscus tear           | 1                 |
| N38yz     | Other acquired deformity NOS        | 1                 |
| N38y      | Other acquired deformity            | 1                 |
| N38       | Other acquired deformity            | 1                 |
| S4J       | Other #-dslc or subluxation         | 1                 |
| N08y0     | Oth.joint deran.NEC-site unsp.      | 1                 |
| N08y1     | Oth.joint deran.NEC-shoulder        | 1                 |
| N08y8     | Oth.joint deran.NEC-other spec      | 1                 |
| N08y9     | Oth.joint deran.NEC-mult.sites      | 1                 |
| N30y0     | Oth.inf.+bone dis-site unspec.      | 1                 |
| N30y1     | Oth.inf.+bone dis-shoulder          | 1                 |
| N30y8     | Oth.inf.+bone dis-other sites       | 1                 |
| N30y9     | Oth.inf.+bone dis-multip.site       | 1                 |
| N30yz     | Oth.inf.+bone dis-NOS               | 1                 |
| N07y      | Oth. internal knee derangement      | 1                 |
| S49       | Oth, mlti+ill-def dislc/sublux      | 1                 |
| N0401     | Oth rheumatoid arthritis-spine      | 1                 |
| S49F      | Oth open traumatic subluxation      | 1                 |
| SRy       | Oth inj inv mult body reg NEC       | 1                 |
| S496      | Oth cls trmatic dislocation         | 1                 |
| S49Ez     | Oth closed subluxation NOS          | 1                 |
| N33B      | Osteoradionecrosis                  | 1                 |
| N3746     | Osteoporotic kyphosis               | 1                 |
| N3300     | Osteoporosis unspecified            | 1                 |
| N330C     | Osteoporosis localized spine        | 1                 |
| N330A     | Osteoporosis in endocr disord       | 1                 |

| Read code | Description                                             | Number of studies |
|-----------|---------------------------------------------------------|-------------------|
| N330z     | Osteoporosis NOS                                        | 1                 |
| N330      | Osteoporosis                                            | 1                 |
| N330D     | Osteoporos due corticosteroid                           | 1                 |
| N3309     | Osteopor,multiple myelomatosis                          | 1                 |
| N3319     | Osteopor path # thor vertebrae                          | 1                 |
| N3318     | Osteopor path # lumb vertebrae                          | 1                 |
| N331A     | Osteopor path # cerv vertebrae                          | 1                 |
| N3313     | Osteopor of disuse + path frct                          | 1                 |
| N09B      | Osteophyte                                              | 1                 |
| N307      | Osteopathy from poliomyelitis                           | 1                 |
| ASDFGOS1  | Osteopaenia                                             | 1                 |
| N334B     | Osteonecrosis in caisson dis                            | 1                 |
| N3349     | Osteonecrosis due to drugs                              | 1                 |
| N334A     | Osteonecr due to prev trauma                            | 1                 |
| N334C     | Osteonecr due haemoglobinopath                          | 1                 |
| N30       | Osteomyelitis/periostitis                               | 1                 |
| N302a     | Osteomyelitis of vertebra                               | 1                 |
| N302      | Osteomyelitis NOS                                       | 1                 |
| N33zH     | Osteolytic lesion                                       | 1                 |
| N33zD     | Osteolysis                                              | 1                 |
| N32z3     | Osteochondrosis NOS                                     | 1                 |
| N32z      | Osteochondropathy NOS                                   | 1                 |
| N32zz     | Osteochondropathy NOS                                   | 1                 |
| N32       | Osteochondropathies                                     | 1                 |
| N32z2     | Osteochondritis of knee                                 | 1                 |
| N3270     | Osteochondritis dissec-patella                          | 1                 |
| N327y     | Osteochondr dissec-other site                           | 1                 |
| N3274     | Osteochondr dissec-capitellum                           | 1                 |
| N327      | Osteochond dissecans                                    | 1                 |
| OX7130E   | Osteoarthritis Shoulder /ox                             | 1                 |
| OX7130B   | Osteoarthritis Knee(S) /ox                              | 1                 |
| OX7131A   | Osteoarthritis Cervical Spine /ox                       | 1                 |
| N11z      | Osteoarthritis spine                                    | 1                 |
| N11D1     | Osteoarthritis of thoracic spine                        | 1                 |
| N11D3     | Osteoarthritis of spine NOS                             | 1                 |
| N11-2     | Osteoarthritis of spine                                 | 1                 |
| N11D      | Osteoarthritis of spine                                 | 1                 |
| N11D2     | Osteoarthritis of lumbar spine                          | 1                 |
| N11D0     | Osteoarthritis of cervical spine                        | 1                 |
| N110-2    | Osteoarthritis cervical spine                           | 1                 |
| N05z0     | Osteoarthritis NOS-site unspec                          | 1                 |
| N05z000   | Osteoarthritis NOS-site unspec                          | 1                 |
| N05z7     | Osteoarthritis NOS-ankle/foot                           | 1                 |
| N05zM     | Osteoarthritis NOS, of tibio-fibular joint              | 1                 |
| N05zQ     | Osteoarthritis NOS, of talonavicular joint              | 1                 |
| N05zK     | Osteoarthritis NOS, of sacro-iliac joint                | 1                 |
| N05zR     | Osteoarthritis NOS, of other tarsal joint               | 1                 |
| N05zF     | Osteoarthritis NOS, of metacarpophalangeal joint        | 1                 |
| N05zT     | Osteoarthritis NOS, of lesser metatarsophalangeal joint | 1                 |
| N05zU     | Osteoarthritis NOS, of interphalangeal joint of toe     | 1                 |
| N05zD     | Osteoarthritis NOS, of distal radio-ulnar joint         | 1                 |
| N05zE     | Osteoarthritis NOS of wrist                             | 1                 |

1  
2  
3  
4  
5  
6  
7  
8  
9  
10  
11  
12  
13  
14  
15  
16  
17  
18  
19  
20  
21  
22  
23  
24  
25  
26  
27  
28  
29  
30  
31  
32  
33  
34  
35  
36  
37  
38  
39  
40  
41  
42  
43  
44  
45  
46  
47  
48  
49  
50  
51  
52  
53  
54  
55  
56  
57  
58  
59  
60

| Read code | Description                      | Number of studies |
|-----------|----------------------------------|-------------------|
| N05z4     | Osteoarthritis NOS of the hand   | 1                 |
| N05z9     | Osteoarthritis NOS of shoulder   | 1                 |
| N05zL     | Osteoarthritis NOS of knee       | 1                 |
| N05zJ     | Osteoarthritis NOS of hip        | 1                 |
| N05zC     | Osteoarthritis NOS of elbow      | 1                 |
| N05zN     | Osteoarthritis NOS of ankle      | 1                 |
| N05zz00   | Osteoarthritis NOS               | 1                 |
| N05zz     | Osteoarthritis NOS               | 1                 |
| N05z1     | Osteoarthritis -shoulder joint   | 1                 |
| N05z800   | Osteoarthritis - other joint     | 1                 |
| N05z8     | Osteoarthritis - other joint     | 1                 |
| N05z6-99  | Osteoarthritis - knee joint      | 1                 |
| N05..11   | Osteoarthritis                   | 1                 |
| N094K     | Osteoarthritis                   | 1                 |
| N05       | Osteoarthritis                   | 1                 |
| N310      | Osteitis deformans-Paget's dis   | 1                 |
| N311      | Osteitis deformans+disease EC    | 1                 |
| N3350     | Osteitis condensans ilii         | 1                 |
| N335      | Osteitis condensans              | 1                 |
| N31       | Osteit.deform./osteop.+dis.EC    | 1                 |
| N3110     | Osteit deformans,neoplast dis    | 1                 |
| N3y03     | Osseous stenosis of neural canal | 1                 |
| N3y06     | Oss/sublux sten intervert foram  | 1                 |
| S900z     | Opn wound shoulder+up limb,NOS   | 1                 |
| SA10      | Opn wnd kneelg+ank-no cmplctn    | 1                 |
| S46A6     | Opn trmtc sublux,head fibula     | 1                 |
| S413z     | Opn trmtc sublux shoulder NOS    | 1                 |
| S468      | Opn trmtc sublux pat-fem jt      | 1                 |
| S46A0     | Opn trmtc sublux knee jt,unsp    | 1                 |
| S46A2     | Opn trmtc sublux knee jt,post    | 1                 |
| S46A4     | Opn trmtc sublux knee jt,ltrl    | 1                 |
| S46A1     | Opn trmtc sublux knee jt,ant     | 1                 |
| S46A      | Opn trmtc sublux knee jt         | 1                 |
| S4112     | Opn trmtc dsclctn shldr jt,post  | 1                 |
| S411z     | Opn trmtc disloctn shouldr NOS   | 1                 |
| S4110     | Opn trmtc dislctn shoulder jnt   | 1                 |
| S49F4     | Opn trm sublux,st-clav jt,post   | 1                 |
| S49F3     | Opn trm sublux,st-clav jt,ant    | 1                 |
| S49F2     | Opn trm sublux st-clav jt        | 1                 |
| S4681     | Opn trm sublux pat-fem jt,med    | 1                 |
| S4680     | Opn trm sublux pat-fem jt,ltrl   | 1                 |
| S49F5     | Opn trm sublux laryngl cartlge   | 1                 |
| S46A5     | Opn trm sublux knee jt,rotatry   | 1                 |
| S46A3     | Opn trm sublux knee jt,medial    | 1                 |
| S4131     | Opn trm sublux acromio-clav jt   | 1                 |
| S4666     | Opn trm dsclctn, head fibula     | 1                 |
| S464      | Opn trm dsclctn patello-fem jt   | 1                 |
| S4641     | Opn trm dsclctn pat-fem jt,med   | 1                 |
| S4640     | Opn trm dsclctn pat-fem jt lat   | 1                 |
| S4660     | Opn trm dsclctn knee, unsp       | 1                 |
| S4664     | Opn trm dsclctn knee jt,lateral  | 1                 |
| S4662     | Opn trm dsclctn knee jt, post    | 1                 |
| S4663     | Opn trm dsclctn knee jt, medial  | 1                 |

| Read code | Description                     | Number of studies |
|-----------|---------------------------------|-------------------|
| S4661     | Opn trm dslctn knee jt, ant     | 1                 |
| S4665     | Opn trm dslct knee jt,rotatory  | 1                 |
| S4973     | Opn trm dslc, stern-clav jt,ant | 1                 |
| S4972     | Opn trm dslc sterno-clav jt     | 1                 |
| S4974     | Opn trm dsl, stern-clav jt,post | 1                 |
| S4114     | Opn trm disc acromio-clav jt    | 1                 |
| S413      | Opn traumtc subluxatn shoulder  | 1                 |
| S4130     | Opn traumtc sublux shouldr jnt  | 1                 |
| S411      | Opn traumtc disloctn shoulder   | 1                 |
| S4115     | Opn traumatic disloctn scapula  | 1                 |
| S49B      | Opn sublux thrcic+Imbr vertbra  | 1                 |
| S49B1     | Opn sublux thoracic spine       | 1                 |
| S499x     | Opn sublux mlti cerv vertebrae  | 1                 |
| S499z     | Opn sublux cerv vertebra NOS    | 1                 |
| S4991     | Opn sublux atlanto-occipitl jt  | 1                 |
| S493C     | Opn spnl dslc+cauda equina lsn  | 1                 |
| S4934     | Opn spnl dslc+ant thrc crd lsn  | 1                 |
| S4939     | Opn spnl dslc+ant Imbr crd lsn  | 1                 |
| S491B     | Opn spnl dslc+ant cerv crd lsn  | 1                 |
| S493B     | Opn spnl dsl+post Imbr crd lsn  | 1                 |
| S491D     | Opn spnl dsl+post cerv crd lsn  | 1                 |
| S4933     | Opn spnl dsl+comp thrc crd lsn  | 1                 |
| S4938     | Opn spnl dsl+comp Imbr crd lsn  | 1                 |
| S4919     | Opn spnl dsl+cerv crd lsn,unsp  | 1                 |
| S4932     | Opn spn dslc+thrc crd lsn,unsp  | 1                 |
| S4936     | Opn spn dslc+post thrc crd lsn  | 1                 |
| S491C     | Opn spn dslc+ctrl cerv crd lsn  | 1                 |
| S491A     | Opn spn dslc+comp cerv crd lsn  | 1                 |
| S4935     | Opn spn dslc+cent thrc crd lsn  | 1                 |
| S493A     | Opn spn dslc+cent Imbr crd lsn  | 1                 |
| S1150     | Opn spn # + unsp lumb crd lesn  | 1                 |
| S1154     | Opn spn # + post lumb crd lesn  | 1                 |
| S1151     | Opn spn # + comp lumb crd lesn  | 1                 |
| S1153     | Opn spn # + cent lumb crd lesn  | 1                 |
| S1155     | Opn spn # + cauda equina lesn   | 1                 |
| S1152     | Opn spn # + ant lumbr crd lesn  | 1                 |
| S5P1z     | Opn dvsn,thyroid regn lgmt NOS  | 1                 |
| S5P1      | Opn dvsn,thyroid region lgmt    | 1                 |
| S5P12     | Opn dvsn,thyroid cartilage lgmt | 1                 |
| S5P30     | Opn dvsn, sternoclavicular lgmt | 1                 |
| S5N       | Opn dvsn,lgmt other part back   | 1                 |
| S5P11     | Opn dvsn,cricothyroid ligament  | 1                 |
| S5P10     | Opn dvsn,cricoarytenoid lgmt    | 1                 |
| S5K1      | Opn dvsn mdl collat lgmt knee   | 1                 |
| S5K0      | Opn dvsn lat collat lgmt knee   | 1                 |
| S5F1      | Opn dvsn coracoclavicular lgmt  | 1                 |
| S5F0      | Opn dvsn acromioclavic lgmt     | 1                 |
| S5K2      | Opn dvs post cruciate lgm knee  | 1                 |
| S5K3      | Opn dvs ant cruciate lgmt knee  | 1                 |
| S4931     | Opn dslc thoracic spine         | 1                 |
| S4975     | Opn dslc laryngl cartilage      | 1                 |
| S1034     | Opn # thorc vert-trnsvrse prcs  | 1                 |
| S1032     | Opn # thorc vert-spondylolysis  | 1                 |



1  
2  
3  
4  
5  
6  
7  
8  
9  
10  
11  
12  
13  
14  
15  
16  
17  
18  
19  
20  
21  
22  
23  
24  
25  
26  
27  
28  
29  
30  
31  
32  
33  
34  
35  
36  
37  
38  
39  
40  
41  
42  
43  
44  
45  
46  
47  
48  
49  
50  
51  
52  
53  
54  
55  
56  
57  
58  
59  
60

| Read code | Description                                            | Number of studies |
|-----------|--------------------------------------------------------|-------------------|
| S1033     | Opn # thorc vert-spinous prcs                          | 1                 |
| S1036     | Opn # thor vert-tricolumnar                            | 1                 |
| S1035     | Opn # thor vert-posterior arch                         | 1                 |
| S1055     | Opn # lumb vert,posterior arch                         | 1                 |
| S1054     | Opn # lumb vert, trnsvrse prcs                         | 1                 |
| S1056     | Opn # lumb vert, tricolumnar                           | 1                 |
| S1052     | Opn # lumb vert, spondylolysis                         | 1                 |
| S1053     | Opn # lumb vert, spinous prcs                          | 1                 |
| S101L     | Opn # cerv vert, trnsvrse prcs                         | 1                 |
| S101N     | Opn # cerv vert, tricolumnar                           | 1                 |
| S101J     | Opn # cerv vert, spondylolysis                         | 1                 |
| S101K     | Opn # cerv vert, spinous prcs                          | 1                 |
| S101M     | Opn # cerv vert, post arch                             | 1                 |
| S101D     | Opn # axis, trnsvrse process                           | 1                 |
| S1018     | Opn # atlas-isol arch/art prcs                         | 1                 |
| S89z      | Open wounds NOS                                        | 1                 |
| S90       | Open wound shoulder/upper limb                         | 1                 |
| S9020     | Open wound shoulder+tendon inv                         | 1                 |
| S9010     | Open wound shoulder+complicat.                         | 1                 |
| S9021     | Open wound scapular+tendon inv                         | 1                 |
| S900      | Open wound of shoulder/upper limb without complication | 1                 |
| S9000     | Open wound of shoulder region                          | 1                 |
| S87       | Open wound of sacroiliac reg.                          | 1                 |
| S84       | Open wound of neck                                     | 1                 |
| SA100     | Open wound of knee                                     | 1                 |
| S86       | Open wound of back                                     | 1                 |
| SA110     | Open wound knee+complication                           | 1                 |
| S8z       | Open wound head/neck/trunk NOS                         | 1                 |
| S8        | Open wound head/neck/trunk                             | 1                 |
| S113z     | Open thoracic #+cord lesn.NOS                          | 1                 |
| S113      | Open thoracic #+cord lesion                            | 1                 |
| S49Dz     | Open subluxation of spine NOS                          | 1                 |
| S49B0     | Open subluxation lumbar spine                          | 1                 |
| S4998     | Open subluxation C7/T1                                 | 1                 |
| S4997     | Open subluxation C6/C7                                 | 1                 |
| S4996     | Open subluxation C5/C6                                 | 1                 |
| S4995     | Open subluxation C4/C5                                 | 1                 |
| S4994     | Open subluxation C3/C4                                 | 1                 |
| S4993     | Open subluxation C2/C3                                 | 1                 |
| S49D0     | Open sublux spine, unspecified                         | 1                 |
| S49D      | Open sublux other vertebra                             | 1                 |
| S4990     | Open sublux cerv spine, unsp                           | 1                 |
| S499      | Open sublux cerv spine                                 | 1                 |
| S4992     | Open sublux atlanto-axial jt                           | 1                 |
| S49y      | Open multiple/ill-def.disloc.                          | 1                 |
| S2921     | Open mult fract clav scap hum                          | 1                 |
| S115      | Open lumbar # + cord lesion                            | 1                 |
| S2115     | Open fracture scapula, spine                           | 1                 |
| S2116     | Open fracture scapula, neck                            | 1                 |
| S2113     | Open fracture scapula, glenoid                         | 1                 |
| S2114     | Open fracture scapula, blade                           | 1                 |
| S321      | Open fracture of the patella                           | 1                 |

| Read code | Description                    | Number of studies |
|-----------|--------------------------------|-------------------|
| S105      | Open fracture lumbar vertebra  | 1                 |
| S1260     | Open fracture larynx           | 1                 |
| S2012     | Open fracture clavicle, shaft  | 1                 |
| S101      | Open fracture cervical spine   | 1                 |
| S1012     | Open fracture axis             | 1                 |
| S1011     | Open fracture atlas            | 1                 |
| S5N0      | Open dvsn, neck ligament       | 1                 |
| S5Fz      | Open dvsn shoulder lgmt NOS    | 1                 |
| S4911     | Open dslc atlanto-occipital jt | 1                 |
| S4912     | Open dslc atlanto-axial jt     | 1                 |
| S5Nz      | Open divisn, back ligament NOS | 1                 |
| S5N1      | Open division, thoracic lgmt   | 1                 |
| S5P       | Open division, other ligament  | 1                 |
| S5Pz      | Open division, other lig NOS   | 1                 |
| S5N2      | Open division, lumbar ligament | 1                 |
| S5F       | Open division shoulder lgmt    | 1                 |
| S5Ky      | Open division other knee lgmt  | 1                 |
| S5M5      | Open division lumbosacral lgmt | 1                 |
| S5K       | Open division ligament knee    | 1                 |
| S5Kz      | Open division knee lgmt NOS    | 1                 |
| S5M4      | Open division iliolumbar lgmt  | 1                 |
| S4950     | Open dislocation spine unspec. | 1                 |
| S495z     | Open dislocation spine NOS     | 1                 |
| S491      | Open dislocation of neck       | 1                 |
| S4930     | Open dislocation lumbar spine  | 1                 |
| S466z     | Open dislocation knee NOS      | 1                 |
| S497z     | Open dislocation NOS           | 1                 |
| S4918     | Open dislocation C7/T1         | 1                 |
| S4917     | Open dislocation C6/C7         | 1                 |
| S4916     | Open dislocation C5/C6         | 1                 |
| S4915     | Open dislocation C4/C5         | 1                 |
| S4914     | Open dislocation C3/C4         | 1                 |
| S4913     | Open dislocation C2/C3         | 1                 |
| S493      | Open disloc.thoracic/lumbar    | 1                 |
| S493z     | Open disloc.thorac./lumbar NOS | 1                 |
| S495      | Open disloc.other vertebra     | 1                 |
| S491x     | Open disloc.mult.cerv.vertebra | 1                 |
| S491z     | Open disloc.cervical vert.NOS  | 1                 |
| S4910     | Open disloc.cerv.spine unspec. | 1                 |
| S111z     | Open cervical#+cord lesion NOS | 1                 |
| S111      | Open cervical#+cord lesion     | 1                 |
| S1263     | Open #trachea                  | 1                 |
| S1262     | Open #thyroid cartilage        | 1                 |
| S11y      | Open #spine+cord lesion unsp.  | 1                 |
| S2110     | Open #scapula-unspecified      | 1                 |
| S211z     | Open #scapula NOS              | 1                 |
| S126z     | Open #larynx/trachea NOS       | 1                 |
| S1261     | Open #hyoid bone               | 1                 |
| S2010     | Open #clavicle unspecified     | 1                 |
| S201z     | Open #clavicle NOS             | 1                 |
| S3z1      | Open #bones unspecified        | 1                 |
| S4F7      | Open #-sublux,patello-fem jt   | 1                 |
| S4J33     | Open #-sublux st-clav jt,post  | 1                 |

1  
2  
3  
4  
5  
6  
7  
8  
9  
10  
11  
12  
13  
14  
15  
16  
17  
18  
19  
20  
21  
22  
23  
24  
25  
26  
27  
28  
29  
30  
31  
32  
33  
34  
35  
36  
37  
38  
39  
40  
41  
42  
43  
44  
45  
46  
47  
48  
49  
50  
51  
52  
53  
54  
55  
56  
57  
58  
59  
60

| Read code | Description                    | Number of studies |
|-----------|--------------------------------|-------------------|
| S4J32     | Open #-sublux st-clav jt,ant   | 1                 |
| S4A30     | Open #-sublux shoulder joint   | 1                 |
| S4A3      | Open #-sublux shoulder         | 1                 |
| S4F3      | Open #-sublux knee joint       | 1                 |
| S4A31     | Open #-sublux acrom-clav joint | 1                 |
| S4F5      | Open #-dslc,patello-fem jt     | 1                 |
| S4F1      | Open #-dslc, knee joint        | 1                 |
| S4J13     | Open #-dslc st-clav jt,post    | 1                 |
| S4J12     | Open #-dslc st-clav jt,ant     | 1                 |
| S4A10     | Open #-dslc shoulder joint     | 1                 |
| S4A1      | Open #-dslc shoulder           | 1                 |
| S4A11     | Open #-dslc acrom-clav joint   | 1                 |
| S1010     | Open # unsp cerv vertebra      | 1                 |
| S103      | Open # thoracic vertebra       | 1                 |
| S1031     | Open # thorac vert, wedge      | 1                 |
| S1030     | Open # thorac vert, burst      | 1                 |
| S1013     | Open # third cerv vertebra     | 1                 |
| S10y      | Open # spine, unspecif         | 1                 |
| S1016     | Open # sixth cerv vertebra     | 1                 |
| S1017     | Open # seventh cerv vert       | 1                 |
| S2112     | Open # scapula, coracoid       | 1                 |
| S2111     | Open # scapula, acromion       | 1                 |
| S211      | Open # scapula                 | 1                 |
| S3213     | Open # patella, vertical       | 1                 |
| S3210     | Open # patella, transverse     | 1                 |
| S3214     | Open # patella, stellate       | 1                 |
| S3211     | Open # patella, proximal pole  | 1                 |
| S3212     | Open # patella, distal pole    | 1                 |
| S1051     | Open # lumbar vert, wedge      | 1                 |
| S1050     | Open # lumbar vert, burst      | 1                 |
| S126      | Open # larynx and trachea      | 1                 |
| S1014     | Open # fourth cerv vertebra    | 1                 |
| S1015     | Open # fifth cerv vertebra     | 1                 |
| S2011     | Open # clavicle, medial end    | 1                 |
| S2013     | Open # clavicle, lateral end   | 1                 |
| S201      | Open # clavicle                | 1                 |
| S101H     | Open # cerv vert, wedge        | 1                 |
| S101G     | Open # cerv vert, burst        | 1                 |
| S101z     | Open # cerv spine NOS          | 1                 |
| S101F     | Open # axis, tricolumnar       | 1                 |
| S101B     | Open # axis, spondylolysis     | 1                 |
| S101C     | Open # axis, spinous procss    | 1                 |
| S101E     | Open # axis, posterior arch    | 1                 |
| S101A     | Open # axis, odontoid prcss    | 1                 |
| S1019     | Open # atlas, comminuted       | 1                 |
| S4113     | Op tr ds shd jt,inf(infr-glen) | 1                 |
| S4111     | Op tr dis shld jt,ant(sub-cor) | 1                 |
| S49Bz     | Op sublx thrc+lmbr vertbra NOS | 1                 |
| S49B2     | Op spn sublx+thrc crd lsn,unsp | 1                 |
| S49B6     | Op spn sublx+post thrc crd lsn | 1                 |
| S49BB     | Op spn sublx+post lmbr crd lsn | 1                 |
| S49B7     | Op spn sublx+lmbr crd lsn,unsp | 1                 |
| S49B3     | Op spn sublx+comp thrc crd lsn | 1                 |

1  
2  
3  
4  
5  
6  
7  
8  
9  
10  
11  
12  
13  
14  
15  
16  
17  
18  
19  
20  
21  
22  
23  
24  
25  
26  
27  
28  
29  
30  
31  
32  
33  
34  
35  
36  
37  
38  
39  
40  
41  
42  
43  
44  
45  
46  
47  
48  
49  
50  
51  
52  
53  
54  
55  
56  
57  
58  
59  
60

| Read code | Description                                                                | Number of studies |
|-----------|----------------------------------------------------------------------------|-------------------|
| S49B8     | Op spn sublx+comp lmb crd lsn                                              | 1                 |
| S499A     | Op spn sublx+comp cerv crd lsn                                             | 1                 |
| S499C     | Op spn sublx+cntrl crv crd lsn                                             | 1                 |
| S4999     | Op spn sublx+cerv crd lsn,unsp                                             | 1                 |
| S49B5     | Op spn sublx+cent thrc crd lsn                                             | 1                 |
| S49BA     | Op spn sublx+cent lmb crd lsn                                              | 1                 |
| S49BC     | Op spn sublx+cauda equina lsn                                              | 1                 |
| S49B4     | Op spn sublx+ant thrc crd lsn                                              | 1                 |
| S499D     | Op spn subluc+post crv crd lsn                                             | 1                 |
| S49B9     | Op spn subluc+ant lmb crd lsn                                              | 1                 |
| S499B     | Op spn subluc+ant cerv crd lsn                                             | 1                 |
| S4937     | Op spn dsl+lmb crd lsn unsp                                                | 1                 |
| S1134     | Op spn #+pst thor crd lsn,T1-6                                             | 1                 |
| S1133     | Op spn #+cnt thor crd lsn,T1-6                                             | 1                 |
| S1132     | Op spn #+ant thor crd lsn,T1-6                                             | 1                 |
| S115z     | Op spn # incmp lmb crd lsn NOS                                             | 1                 |
| S1130     | Op sp #+unsp thor crd lsn,T1-6                                             | 1                 |
| S1136     | Op sp #+unsp thor cd lsn,T7-12                                             | 1                 |
| S113A     | Op sp #+pst thor crd lsn,T7-12                                             | 1                 |
| S1139     | Op sp #+cnt thor crd lsn,T7-12                                             | 1                 |
| S1131     | Op sp #+cmpl thor crd lsn,T1-6                                             | 1                 |
| S1137     | Op sp #+cmp thor crd lsn,T7-12                                             | 1                 |
| S1138     | Op sp #+ant thor crd lsn,T7-12                                             | 1                 |
| S1501     | Op multi fractur of thor spine                                             | 1                 |
| SR161     | Op fract/th wth lw bck+plv+lmb                                             | 1                 |
| SR101     | Op fract invol head with neck                                              | 1                 |
| S113B     | Op # T7-12incomp cord lsn NOS                                              | 1                 |
| S1135     | Op # T1-6 incomp cord lsn NOS                                              | 1                 |
| S1116     | Op # C5-7 unspc cord lesion                                                | 1                 |
| S111A     | Op # C5-7 posterior cord lesn                                              | 1                 |
| S111B     | Op # C5-7 incomp cord les NOS                                              | 1                 |
| S1117     | Op # C5-7 compl cord lesion                                                | 1                 |
| S1119     | Op # C5-7 central cord les                                                 | 1                 |
| S1118     | Op # C5-7 anterior cord les                                                | 1                 |
| S1110     | Op # C1-C4 unspc cord les                                                  | 1                 |
| S1114     | Op # C1-4 post cord lesion                                                 | 1                 |
| S1115     | Op # C1-4 cord les. NOS                                                    | 1                 |
| S1111     | Op # C1-4 compl cord lesion                                                | 1                 |
| S1113     | Op # C1-4 cent cord lesion                                                 | 1                 |
| S1112     | Op # C1-4 ant cord lesion                                                  | 1                 |
| N1120     | One lev th spondyl-no myelop                                               | 1                 |
| N11B0     | One lev th spondyl + radiculop                                             | 1                 |
| N1130     | One lev th spondyl + myelop                                                | 1                 |
| N1140     | One lev lumbsac spond-no myelo                                             | 1                 |
| N1150     | One lev lumbsac spond + myelop                                             | 1                 |
| N1100     | One lev Cx spondyl-no myelop                                               | 1                 |
| N1190     | One lev Cx spondyl + radiculop                                             | 1                 |
| N1110     | One lev Cx spondyl + myelop                                                | 1                 |
| N0542     | Oligoarticular osteoarthritis, unspecified, of upper arm                   | 1                 |
| N0545     | Oligoarticular osteoarthritis, unspecified, of the pelvic region and thigh | 1                 |
| N0546     | Oligoarticular osteoarthritis, unspecified, of lower leg                   | 1                 |

1  
2  
3  
4  
5  
6  
7  
8  
9  
10  
11  
12  
13  
14  
15  
16  
17  
18  
19  
20  
21  
22  
23  
24  
25  
26  
27  
28  
29  
30  
31  
32  
33  
34  
35  
36  
37  
38  
39  
40  
41  
42  
43  
44  
45  
46  
47  
48  
49  
50  
51  
52  
53  
54  
55  
56  
57  
58  
59  
60

| Read code | Description                                                   | Number of studies |
|-----------|---------------------------------------------------------------|-------------------|
| N0544     | Oligoarticular osteoarthritis, unspecified, of hand           | 1                 |
| N0543     | Oligoarticular osteoarthritis, unspecified, of forearm        | 1                 |
| N0547     | Oligoarticular osteoarthritis, unspecified, of ankle and foot | 1                 |
| N054      | Oligoarticular OA unspecified                                 | 1                 |
| N0541     | Oligoartic OA, unspec-shoulder                                | 1                 |
| N0549     | Oligoartic OA, unspec-multiple                                | 1                 |
| N0540     | Oligoartic OA, unsp-unsp sites                                | 1                 |
| N0548     | Oligoartic OA unspec-oth site                                 | 1                 |
| N2133     | Olecranon bursitis                                            | 1                 |
| N0720     | Old torn meniscus of knee                                     | 1                 |
| N070B     | Old tear post horn med menis                                  | 1                 |
| N070A     | Old tear of medial meniscus                                   | 1                 |
| N071C     | Old tear of lateral meniscus                                  | 1                 |
| N07y9     | Old post/lat caps complex tear                                | 1                 |
| N07y3     | Old post.cruciate lig.disrupt.                                | 1                 |
| N07yF     | Old part tear post cruciat lig                                | 1                 |
| N07yA     | Old part tear med collat lig                                  | 1                 |
| N07y7     | Old part tear lat collat lig                                  | 1                 |
| N07yD     | Old part tear ant cruciate lig                                | 1                 |
| N07y1     | Old med.collat.lig.disruption                                 | 1                 |
| N07yC     | Old med capsular complex tear                                 | 1                 |
| N07y0     | Old lat.collat.lig.disruption                                 | 1                 |
| N07yB     | Old compl tear med collat lig                                 | 1                 |
| N07y8     | Old compl tear lat collat lig                                 | 1                 |
| N07yG     | Old comp tear post cruciat lig                                | 1                 |
| N07yE     | Old comp tear ant cruciate lig                                | 1                 |
| N07y4     | Old capsular knee lig.disrupt.                                | 1                 |
| N0701     | Old bucket handle tear-medial                                 | 1                 |
| N0711     | Old bucket handle tear-lat men                                | 1                 |
| N07y2     | Old ant.cruciate lig.disrupt.                                 | 1                 |
| N067      | Ochronotic arthropathy                                        | 1                 |
| N054z     | OA,1 site +,unspecified NOS                                   | 1                 |
| N05zP     | OA NOS-subtalar joint                                         | 1                 |
| N05zA     | OA NOS-sternoclavicular joint                                 | 1                 |
| N05zB     | OA NOS-acromioclavicular join                                 | 1                 |
| N05zG     | OA NOS-PIP joint of finger                                    | 1                 |
| N05zH     | OA NOS-DIP joint of finger                                    | 1                 |
| N05zS     | OA NOS-1st MTP joint                                          | 1                 |
| N3381     | Nonunion of fracture                                          | 1                 |
| N226      | Nontraumatic tendon subluxatn                                 | 1                 |
| N23y2     | Nontraumatic muscle rupture                                   | 1                 |
| N2260     | Nontraum.unspec.tendon rupture                                | 1                 |
| N392      | Nonallopathic lesion-thoracic                                 | 1                 |
| N393      | Nonallopathic lesion-lumbar                                   | 1                 |
| N391      | Nonallopathic lesion-cervical                                 | 1                 |
| N082Z     | Non-trau subl acromiocl joint                                 | 1                 |
| N044      | Nodular fibrositis-chr. rheum.                                | 1                 |
| N2372     | Nodular fasciitis                                             | 1                 |
| 16A1      | No stiff neck                                                 | 1                 |
| 16C1      | No backache                                                   | 1                 |
| 1229      | No FH: Osteoporosis                                           | 1                 |
| N2471     | Night cramps                                                  | 1                 |

| Read code  | Description                           | Number of studies |
|------------|---------------------------------------|-------------------|
| N11y2      | Neuropathic spondylopathy             | 1                 |
| N2423      | Neuropathic pain                      | 1                 |
| N374B      | Neuromuscular scoliosis               | 1                 |
| N3749      | Neuromuscular lordosis                | 1                 |
| N3745      | Neuromuscular kyphosis                | 1                 |
| N14A       | Neurogenic claudication               | 1                 |
| N2421      | Neuritis unspecified                  | 1                 |
| N2420      | Neuralgia unspecified                 | 1                 |
| N242z      | Neuralg./neurit./radiculit.NOS        | 1                 |
| N242       | Neuralg./neurit./radicul.unsp.        | 1                 |
| SJ         | Nerve/spinal cord injuries            | 1                 |
| EMISNQNE5  | Nerve root pain present               | 1                 |
| SJz        | Nerve and spinal cord injury NOS      | 1                 |
| S5700      | Neck sprain unspecified               | 1                 |
| S570z      | Neck sprain NOS                       | 1                 |
| S570       | Neck sprain                           | 1                 |
| N12D       | Narrowing disc space                  | 1                 |
| N2332      | Myositis in sarcoidosis               | 1                 |
| N2321      | Myofibrosis                           | 1                 |
| N241-97    | Myalgia/myositis - shoulder           | 1                 |
| EGTON307   | Myalgia                               | 1                 |
| EMISNQMU15 | Musculoskeletal symptom               | 1                 |
| EMISNQMU5  | Musculoskeletal pain severe           | 1                 |
| EMISNQMU2  | Musculoskeletal pain present          | 1                 |
| EMISNQMU4  | Musculoskeletal pain moderate         | 1                 |
| N096-2     | Musculoskeletal pain - joints         | 1                 |
| MAWBYMU1   | Musculoskeletal Symptoms              | 1                 |
| N3         | Musculosk.inflam/deform.+other        | 1                 |
| N232z      | Muscle wasting/atrophy NEC NOS        | 1                 |
| N232       | Muscle wasting and disuse atrophy NEC | 1                 |
| N2322      | Muscle wasting NEC                    | 1                 |
| UNMAPM4AB  | Muscle strain                         | 1                 |
| N23yD      | Muscle strain                         | 1                 |
| N2410-2    | Muscle pain                           | 1                 |
| N231       | Muscle ossification                   | 1                 |
| S5yz1      | Muscle injury / strain                | 1                 |
| N238       | Muscle contracture                    | 1                 |
| N231z      | Muscle calcif./ossificat.NOS          | 1                 |
| N230D      | Muscle abscess-shoulder               | 1                 |
| N230B      | Muscle abscess-neck                   | 1                 |
| N230C      | Muscle abscess-back                   | 1                 |
| N230A      | Muscle abscess                        | 1                 |
| ASDFGMU2   | Muscle Symptoms                       | 1                 |
| EGTON110   | Muscle Injury                         | 1                 |
| M4A8       | Muscle Injury                         | 1                 |
| N2310      | Musc.calcif./ossif.unspecified        | 1                 |
| N0719      | Multiple tears-lat meniscus           | 1                 |
| N0708      | Multiple tears of medial meniscus     | 1                 |
| S101x      | Multiple open # cerv vert             | 1                 |
| SR1z       | Multiple fractures unspecified        | 1                 |
| S100x      | Multiple clsd # cerv vert             | 1                 |
| N099A      | Multiple clicking joints              | 1                 |
| S3y        | Multiple #legs/arms/ribs/stern        | 1                 |

1  
2  
3  
4  
5  
6  
7  
8  
9  
10  
11  
12  
13  
14  
15  
16  
17  
18  
19  
20  
21  
22  
23  
24  
25  
26  
27  
28  
29  
30  
31  
32  
33  
34  
35  
36  
37  
38  
39  
40  
41  
42  
43  
44  
45  
46  
47  
48  
49  
50  
51  
52  
53  
54  
55  
56  
57  
58  
59  
60

| Read code   | Description                                | Number of studies |
|-------------|--------------------------------------------|-------------------|
| S10A2       | Multip fracture/cervical spin              | 1                 |
| N11C2       | Multi lev lumbsac spond+radicu             | 1                 |
| S150        | Multi fractures/thoracic spine             | 1                 |
| S3y1        | Mult.open #legs/arms/ribs                  | 1                 |
| S3y0        | Mult.closed #legs/arms/ribs                | 1                 |
| N1122       | Mult lev th spondyl-no myelop              | 1                 |
| N11B2       | Mult lev th spondyl+radiculop              | 1                 |
| N1132       | Mult lev th spondyl + myelop               | 1                 |
| N1142       | Mult lev lumbsac spond-no myel             | 1                 |
| N1152       | Mult lev lumbsac spond + myelo             | 1                 |
| N1102       | Mult lev Cx spondyl-no myelop              | 1                 |
| N1192       | Mult lev Cx spondyl+radiculop              | 1                 |
| N1112       | Mult lev Cx spondyl + myelop               | 1                 |
| S10B6       | Mult fractur/lumbar spine+pelv             | 1                 |
| S292        | Mult fract/clav,scapula+humrus             | 1                 |
| 1D17        | Morning stiffness - joint                  | 1                 |
| N3323       | Monostotic fibrous dysplasia               | 1                 |
| N0433       | Monarticular juvenile R.A.                 | 1                 |
| EMISNQMI188 | Mixed connective tissue disease            | 1                 |
| OX6954MC    | Mixed Connective Tissue Disease /ox        | 1                 |
| N2224       | Miners' knee                               | 1                 |
| N2172       | Metatarsalgia NOS                          | 1                 |
| N063.11     | Menopausal arthritis                       | 1                 |
| N063        | Menopausal arthritis                       | 1                 |
| N072        | Meniscus derangement NEC                   | 1                 |
| N070        | Medial meniscus derangement                | 1                 |
| N070z       | Medial meniscus derange.NOS                | 1                 |
| N0703       | Medial menisc.post.horn derang             | 1                 |
| N0700       | Medial menisc.derang.unspecif              | 1                 |
| N0702       | Medial menisc.ant.horn derang.             | 1                 |
| N2131       | Medial epicondylitis - elbow               | 1                 |
| 16CA        | Mechanical low back pain                   | 1                 |
| N3380       | Malunion of fracture                       | 1                 |
| N338        | Malunion and nonunion of fracture          | 1                 |
| N11C        | Lumbosacral spondylosis with radiculopathy | 1                 |
| N115        | Lumbosacral spond.+ myelopathy             | 1                 |
| SJ35        | Lumbosacral plexus injury                  | 1                 |
| N1441       | Lumbosacral neuritis unspecif.             | 1                 |
| N1463       | Lumbosacral instability                    | 1                 |
| N1460       | Lumbosacral ankylosis                      | 1                 |
| N114-2      | Lumbar spondylosis                         | 1                 |
| N148C       | Lumbar spine instability                   | 1                 |
| N1486       | Lumbar spine ankylosis                     | 1                 |
| N1402       | Lumbar spinal stenosis                     | 1                 |
| N12A3       | Lumbar postlaminectomy syndr.              | 1                 |
| SJ321       | Lumbar nerve root injury - L2              | 1                 |
| N12zC       | Lumbar discitis                            | 1                 |
| N122        | Lumbar disc displacement                   | 1                 |
| N1293       | Lumbar disc disord.+myelopathy             | 1                 |
| N127        | Lumbar disc degeneration                   | 1                 |
| S572        | Lumbar back sprain                         | 1                 |
| N1420       | Lumbago with sciatica                      | 1                 |
| N142-4      | Lumbago                                    | 1                 |

| Read code | Description                                                        | Number of studies |
|-----------|--------------------------------------------------------------------|-------------------|
| N140A     | Lu spin stenosis due to oth dis                                    | 1                 |
| N12C2     | Lu disc prolapse+radiculopathy                                     | 1                 |
| N12B2     | Lu disc prolapse + myelopathy                                      | 1                 |
| N12C3     | Lu disc prol+caud eq compress                                      | 1                 |
| N142-1    | Low back pain                                                      | 1                 |
| EGTON264  | Low Back Pain                                                      | 1                 |
| N374W     | Lordosis unspecified                                               | 1                 |
| N3747     | Lordosis in skeletal dysplasia                                     | 1                 |
| N3748     | Lordosis in hip disease                                            | 1                 |
| N3742     | Lordosis + other condition                                         | 1                 |
| N0818     | Loose joint body-multip joints                                     | 1                 |
| N081z     | Loose joint body (ex.knee)NOS                                      | 1                 |
| N081A     | Loose body, oth joint-shoulder                                     | 1                 |
| N0811     | Loose body joint-shoulder                                          | 1                 |
| N0819     | Loose body in shoulder joint                                       | 1                 |
| N073      | Loose body in knee                                                 | 1                 |
| N081      | Loose body in joint-excl.knee                                      | 1                 |
| N0817     | Loose body in joint, joint OS                                      | 1                 |
| N0810     | Loose body in joint                                                | 1                 |
| N07yH     | Locking knee                                                       | 1                 |
| N07y5     | Locked knee                                                        | 1                 |
| N0522     | Localised, secondary osteoarthritis of the upper arm               | 1                 |
| N0525     | Localised, secondary osteoarthritis of the pelvic region and thigh | 1                 |
| N0526     | Localised, secondary osteoarthritis of the lower leg               | 1                 |
| N0524     | Localised, secondary osteoarthritis of the hand                    | 1                 |
| N0523     | Localised, secondary osteoarthritis of the forearm                 | 1                 |
| N0527     | Localised, secondary osteoarthritis of the ankle and foot          | 1                 |
| N051E     | Localised, primary osteoarthritis of toe                           | 1                 |
| N0512     | Localised, primary osteoarthritis of the upper arm                 | 1                 |
| N0515     | Localised, primary osteoarthritis of the pelvic region and thigh   | 1                 |
| N0513     | Localised, primary osteoarthritis of the forearm                   | 1                 |
| N0517     | Localised, primary osteoarthritis of the ankle and foot            | 1                 |
| N051F     | Localised, primary osteoarthritis of elbow                         | 1                 |
| N052z     | Localised secondary OA NOS                                         | 1                 |
| N051z     | Localised primary OA NOS                                           | 1                 |
| N0532     | Localised osteoarthritis, unspecified, of the upper arm            | 1                 |
| N0537     | Localised osteoarthritis, unspecified, of the ankle and foot       | 1                 |
| N053z     | Localised OA unspecified NOS                                       | 1                 |
| N053      | Localised OA unspecified                                           | 1                 |
| N052      | Local.secondary osteoarthritis                                     | 1                 |
| N0520     | Local.secondary OA-site unsp.                                      | 1                 |
| N0521     | Local.secondary OA-shoulder                                        | 1                 |
| N0528     | Local.secondary OA-other spec.                                     | 1                 |
| N051      | Local.primary osteoarthritis                                       | 1                 |
| N0510     | Local.primary OA-site unsp.                                        | 1                 |
| N0511     | Local.primary OA-shoulder regn                                     | 1                 |
| N0518     | Local.primary OA-other specif                                      | 1                 |
| N0516     | Local.primary OA-lower leg                                         | 1                 |
| N0514     | Local.primary OA-hand                                              | 1                 |



1  
2  
3  
4  
5  
6  
7  
8  
9  
10  
11  
12  
13  
14  
15  
16  
17  
18  
19  
20  
21  
22  
23  
24  
25  
26  
27  
28  
29  
30  
31  
32  
33  
34  
35  
36  
37  
38  
39  
40  
41  
42  
43  
44  
45  
46  
47  
48  
49  
50  
51  
52  
53  
54  
55  
56  
57  
58  
59  
60

| Read code | Description                        | Number of studies |
|-----------|------------------------------------|-------------------|
| N0530     | Local.OA unsp.-site unspecif.      | 1                 |
| N0531     | Local.OA unsp.-shoulder region     | 1                 |
| N0538     | Local.OA unsp.-other specified     | 1                 |
| N0534     | Local.OA unsp.-hand                | 1                 |
| N0533     | Local.OA unsp.-forearm             | 1                 |
| N051D     | Local prim osteoarth wrist         | 1                 |
| N3308     | Local osteoporosis - Lequesne      | 1                 |
| S5z       | Ligament sprain NOS                | 1                 |
| N0001     | Libman-Sacks disease               | 1                 |
| N245-6    | Leg pain                           | 1                 |
| N234      | Laxity of ligament                 | 1                 |
| SJ43      | Latrl cutaneous branch T12 inj     | 1                 |
| N071      | Lateral meniscus derangement       | 1                 |
| N0714     | Lateral meniscus derangem.NOS      | 1                 |
| N0713     | Lateral menisc.post.horn deran     | 1                 |
| N0710     | Lateral menisc.derang.unspecif     | 1                 |
| N0712     | Lateral menisc.ant.horn derang     | 1                 |
| N2132     | Lateral epicondylitis of the elbow | 1                 |
| MHTBALA9  | Lateral Patella Release            | 1                 |
| SC08      | Late effect-tendon injury          | 1                 |
| SC05      | Late effect-mult./other #bones     | 1                 |
| SC06      | Late effect-dislocation            | 1                 |
| SC01      | Late effect-#spine-no cord les     | 1                 |
| SC011     | Late effect # thoracic vert        | 1                 |
| SC012     | Late effect # lumbar vertebra      | 1                 |
| SC010     | Late effect # cervic vertebra      | 1                 |
| EGTON119  | Laceration Nos                     | 1                 |
| N3744     | Kyphosis in skeletal dysplasia     | 1                 |
| N3713     | Kyphosis due to oth treatment      | 1                 |
| N3741     | Kyphosis + other condition         | 1                 |
| N373z     | Kyphoscoliosis or scoliosis NOS    | 1                 |
| N373      | Kyphoscoliosis and scoliosis       | 1                 |
| N3241     | Kohler's dis.(prim.patell.ctr)     | 1                 |
| N0956     | Knee stiff                         | 1                 |
| S54y      | Knee sprain NOS                    | 1                 |
| S54       | Knee sprain                        | 1                 |
| N0106     | Knee pyogenic arthritis            | 1                 |
| N0826     | Knee pathological dislocation      | 1                 |
| 1M10      | Knee pain                          | 1                 |
| N05z6     | Knee osteoarthritis NOS            | 1                 |
| N05z6-1   | Knee osteoarthritis NOS            | 1                 |
| N0946-1   | Knee joint pain                    | 1                 |
| N0946     | Knee joint pain                    | 1                 |
| N0846     | Knee joint contracture             | 1                 |
| N0856     | Knee joint ankylosis               | 1                 |
| N0966     | Knee gives way                     | 1                 |
| N216z     | Knee enthesopathy NOS              | 1                 |
| N06z6-1   | Knee arthritis NOS                 | 1                 |
| N06z6     | Knee arthritis NOS                 | 1                 |
| ASDFGKN2  | Knee Pain?                         | 1                 |
| ASDFGKN6  | Knee Pain Does Not Affect Sleep    | 1                 |
| ASDFGKN4  | Knee Pain Affects Sleep?           | 1                 |
| ASDFGKN5  | Knee Pain Affects Sleep            | 1                 |

| Read code | Description                    | Number of studies |
|-----------|--------------------------------|-------------------|
| ASDFGKN3  | Knee Pain                      | 1                 |
| MUNNUKN1  | Knee Pain                      | 1                 |
| MAWBYKN1  | Knee Pain                      | 1                 |
| N0836     | Knee - recurrent dislocation   | 1                 |
| N13y1     | Klippel's disease              | 1                 |
| N116      | Kissing spine                  | 1                 |
| N002      | Keratoconjunctivitis sicca     | 1                 |
| N0600     | Kaschin-Beck dis.-site unspec. | 1                 |
| N0601     | Kaschin-Beck dis.-shoulder     | 1                 |
| N0608     | Kaschin-Beck dis.-other specif | 1                 |
| N0609     | Kaschin-Beck dis.-multipl.site | 1                 |
| N060z     | Kaschin-Beck dis.-NOS          | 1                 |
| N060      | Kaschin - Beck disease         | 1                 |
| N320z     | Juvenile spine osteochondr.NOS | 1                 |
| N3200     | Juvenile spine osteochond.unsp | 1                 |
| N0455     | Juvenile rheumatoid arthritis  | 1                 |
| N0430     | Juvenile rheumatoid arthr.unsp | 1                 |
| N043z     | Juvenile rheumatoid arthr.NOS  | 1                 |
| N3263     | Juvenile osteochondrosis NOS   | 1                 |
| N326z     | Juvenile osteochondroses NOS   | 1                 |
| N3262     | Juvenile osteochondritis NOS   | 1                 |
| N3261     | Juvenile epiphysitis NOS       | 1                 |
| N0030     | Juvenile dermatomyositis       | 1                 |
| N3260     | Juvenile apophysitis NOS       | 1                 |
| N043      | Juvenile R.A.- Still's disease | 1                 |
| OX7120DA  | Juvenile Arthritis /ox         | 1                 |
| N3243     | Juv.osteoch.secondary.pat.ctre | 1                 |
| N0451     | Juv seronegative polyarthritis | 1                 |
| N328      | Juv osteochondrosis of spine   | 1                 |
| N0452     | Juv arthritis in psoriasis     | 1                 |
| N0453     | Juv arthritis in Crohn's dis   | 1                 |
| N0454     | Juv arth in ulcerative colitis | 1                 |
| N0900     | Joint effusion-site unspecif.  | 1                 |
| N0901     | Joint effusion-shoulder region | 1                 |
| N0908     | Joint effusion-other specif.   | 1                 |
| N09z1     | Joint disord.NOS-shoulder      | 1                 |
| N08z      | Joint derangement NOS          | 1                 |
| N08zz     | Joint derangement NOS          | 1                 |
| N08z0     | Joint derange.NOS-site unspec. | 1                 |
| N08z1     | Joint derange.NOS-shoulder     | 1                 |
| N08z7     | Joint derange.NOS-other spec.  | 1                 |
| N08z8     | Joint derange.NOS-multipl.site | 1                 |
| N05z.11   | Joint degeneration             | 1                 |
| N05z      | Joint degeneration             | 1                 |
| N0840     | Joint contracture-site unspec  | 1                 |
| N0841     | Joint contracture-shoulder     | 1                 |
| N0848     | Joint contracture-other specif | 1                 |
| N0850     | Joint ankylosis-site unspecif. | 1                 |
| N0851     | Joint ankylosis-shoulder       | 1                 |
| N0858     | Joint ankylosis-other specif.  | 1                 |
| ASDFGJO2  | Joint Symptoms                 | 1                 |
| ASDFGJO3  | Joint Pain                     | 1                 |
| N3841     | Isthmic spondylolisthesis      | 1                 |

1  
2  
3  
4  
5  
6  
7  
8  
9  
10  
11  
12  
13  
14  
15  
16  
17  
18  
19  
20  
21  
22  
23  
24  
25  
26  
27  
28  
29  
30  
31  
32  
33  
34  
35  
36  
37  
38  
39  
40  
41  
42  
43  
44  
45  
46  
47  
48  
49  
50  
51  
52  
53  
54  
55  
56  
57  
58  
59  
60

| Read code | Description                       | Number of studies |
|-----------|-----------------------------------|-------------------|
| S531      | Ischiocapsular sprain             | 1                 |
| N23yB     | Ischaemic infarction of muscle    | 1                 |
| N123-1    | Intervertebral disc prol. NOS     | 1                 |
| N12z      | Intervertebral disc lesion NOS    | 1                 |
| OX7259AP  | Intervertebral Disc Prolapsed /ox | 1                 |
| N3y05     | Intervert disc sten neur canal    | 1                 |
| N23y0     | Interstitial myositis             | 1                 |
| N07z      | Internal knee derangement NOS     | 1                 |
| N07       | Internal derangement of knee      | 1                 |
| N1350     | Intermittent torticollis          | 1                 |
| N090W     | Intermittent hydrarthrosis        | 1                 |
| N084E     | Int rotat contracture-shoulder    | 1                 |
| N08y      | Instability of joint              | 1                 |
| SJ7z      | Injury to other nerve NOS         | 1                 |
| SKz       | Injury NOS                        | 1                 |
| OX9967C   | Injury Knee /ox                   | 1                 |
| SJ9       | Injur/nerv+spinal crd/thorx lev   | 1                 |
| SJB       | Inj/nerves/should+upp arm lev     | 1                 |
| S46C      | Inj/multipl structures of knee    | 1                 |
| S5Q6      | Inj tendon rotator cuff should    | 1                 |
| N2166     | Infrapatellar bursitis            | 1                 |
| N10       | Inflammatory spondylopathies      | 1                 |
| N04       | Inflammatory polyarthropathy      | 1                 |
| N04*      | Inflammatory arthropathy          | 1                 |
| N10y0     | Inflamm.spondylop.in dis. EC      | 1                 |
| N04z      | Inflamm.polyarthropathy NOS       | 1                 |
| S4103     | Inferior dislocation shoulder     | 1                 |
| N2302     | Infective myositis-shoulder       | 1                 |
| N2300     | Infective myositis-neck           | 1                 |
| N2301     | Infective myositis-back           | 1                 |
| N01z      | Infective arthritis NOS           | 1                 |
| N01zz     | Infective arthritis NOS           | 1                 |
| N302B     | Infection of thoracic spine       | 1                 |
| N302G     | Infection of scapula              | 1                 |
| N302R     | Infection of patella              | 1                 |
| N302Z     | Infection of multiple bones       | 1                 |
| N302C     | Infection of lumbar spine         | 1                 |
| N302F     | Infection of clavicle             | 1                 |
| N302A     | Infection of cervical spine       | 1                 |
| N01z0     | Infect.arthr.NOS-site unspecif    | 1                 |
| N01z1     | Infect.arthr.NOS-shoulder reg     | 1                 |
| N01zy     | Infect.arthr.NOS-other specifi    | 1                 |
| N01zx     | Infect.arthr.NOS-multiple site    | 1                 |
| N12zG     | Infect intervert disc - pyogen    | 1                 |
| N01z8     | Infec arthritis NOS-shoulder      | 1                 |
| N01zK     | Infec arthritis NOS-knee          | 1                 |
| N01z9     | Infec arthr NOS-sternoclav jt     | 1                 |
| N01zA     | Infec arth NOS-acromioclav jt     | 1                 |
| N23y5     | Inappropriate firing of muscle    | 1                 |
| N2124     | Impingement syndr of shoulder     | 1                 |
| N2331     | Immobility syndrome               | 1                 |
| N2159     | Iliotibial band syndrome          | 1                 |
| N1403     | Idiopathic th spinal stenosis     | 1                 |

| Read code | Description                       | Number of studies |
|-----------|-----------------------------------|-------------------|
| N3730     | Idiopathic scoliosis              | 1                 |
| N3303     | Idiopathic osteoporosis           | 1                 |
| N1407     | Idiopathic lu spinal stenosis     | 1                 |
| N3731     | Idiopathic kyphoscoliosis         | 1                 |
| N33z7     | Idiopathic hypertrophy of bone    | 1                 |
| N1300     | Idiopathic Cx spinal stenosis     | 1                 |
| N3316     | Idiopath osteopor + path fract    | 1                 |
| N3348     | Idiopath aseptic necrosis of bone | 1                 |
| N1405     | iatrogenic th spinal stenosis     | 1                 |
| N1409     | iatrogenic lu spinal stenosis     | 1                 |
| N1302     | iatrogenic Cx spinal stenosis     | 1                 |
| C04*      | Hypothyroidism                    | 1                 |
| N2431     | Hypertrophy of knee fat pad       | 1                 |
| N33z4     | Hypertrophy of bone               | 1                 |
| N3382     | Hypertrophic non-union of #       | 1                 |
| N312      | Hypertroph.pulm.osteoarthrop.     | 1                 |
| N02y8     | Hydroxyapatite deposition dis     | 1                 |
| N2225     | Housemaids knee                   | 1                 |
| N0707     | Horiz cleavage tear-med menisc    | 1                 |
| N0718     | Horiz cleavage tear-lat menisc    | 1                 |
| N094K-2   | Hip pain                          | 1                 |
| N05z5     | Hip osteoarthritis NOS            | 1                 |
| N05z5-1   | Hip osteoarthritis NOS            | 1                 |
| N0535     | Hip osteoarthritis NOS            | 1                 |
| N0535-2   | Hip osteoarthritis NOS            | 1                 |
| N06z5     | Hip arthritis NOS                 | 1                 |
| N0809     | Hill-Sachs lesion                 | 1                 |
| N245-5    | Heel pain                         | 1                 |
| N0507     | Heberden's nodes with arthropathy | 1                 |
| N245-4    | Hand pain                         | 1                 |
| N2450     | Hand pain                         | 1                 |
| N0944-1   | Hand joint pain                   | 1                 |
| N06z4-1   | Hand arthritis NOS                | 1                 |
| N068      | Haemophilic arthropathy           | 1                 |
| N091B     | Haemarthrosis-sternoclav joint    | 1                 |
| N0910     | Haemarthrosis-site unspecified    | 1                 |
| N0911     | Haemarthrosis-shoulder            | 1                 |
| N0918     | Haemarthrosis-other specified     | 1                 |
| N0919     | Haemarthrosis-multiple joints     | 1                 |
| N091C     | Haemarthrosis-acromioclav jt      | 1                 |
| N0916     | Haemarthrosis of the knee         | 1                 |
| N091A     | Haemarthrosis of shoulder         | 1                 |
| N091M     | Haemarthrosis of knee             | 1                 |
| N091z     | Haemarthrosis NOS                 | 1                 |
| N091      | Haemarthrosis                     | 1                 |
| N083M     | Habitual sublux shoulder          | 1                 |
| N083L     | Habitual disloc shoulder          | 1                 |
| N083r     | Habitual disloc - patella         | 1                 |
| 14G8      | H/O: vertebral fracture           | 1                 |
| 14G1      | H/O: rheumatoid arthritis         | 1                 |
| 14G2      | H/O: osteoarthritis               | 1                 |
| 14GZ      | H/O: musculo-skeletal dis. NOS    | 1                 |
| 14G3      | H/O: knee problem                 | 1                 |

1  
2  
3  
4  
5  
6  
7  
8  
9  
10  
11  
12  
13  
14  
15  
16  
17  
18  
19  
20  
21  
22  
23  
24  
25  
26  
27  
28  
29  
30  
31  
32  
33  
34  
35  
36  
37  
38  
39  
40  
41  
42  
43  
44  
45  
46  
47  
48  
49  
50  
51  
52  
53  
54  
55  
56  
57  
58  
59  
60

| Read code  | Description                     | Number of studies |
|------------|---------------------------------|-------------------|
| 14J        | H/O: injury                     | 1                 |
| 14G4       | H/O: back problem               | 1                 |
| 14T5       | H/O: artificial joint           | 1                 |
| 14V5       | H/O: arthrodesis                | 1                 |
| 14G        | H/O: arthritis                  | 1                 |
| 14N30      | H/O Spinal surgery              | 1                 |
| 16Z2       | Growing pains                   | 1                 |
| S3z00      | Greenstick fracture             | 1                 |
| N0230      | Gouty arthritis-site unspecif.  | 1                 |
| N0231      | Gouty arthritis-shoulder        | 1                 |
| N023y      | Gouty arthritis-other specif.   | 1                 |
| N023x      | Gouty arthritis-multiple sites  | 1                 |
| N023z      | Gouty arthritis NOS             | 1                 |
| N023       | Gouty arthritis                 | 1                 |
| N2131-1    | Golfer's elbow                  | 1                 |
| N200       | Gnt cell arter+polymyalg rheum  | 1                 |
| EGTON444   | Gluteal Muscle Injury           | 1                 |
| N0873      | Glenoid labrum tear             | 1                 |
| N0872      | Glenoid labrum detachment       | 1                 |
| N365       | Genu recurvatum - acquired      | 1                 |
| N050z      | Generalised osteoarthritis NOS  | 1                 |
| N050z00    | Generalised osteoarthritis NOS  | 1                 |
| N050       | Generalised osteoarthritis - OA | 1                 |
| N050.0     | Generalised osteoarthritis - OA | 1                 |
| N065A      | Generalised arthritis           | 1                 |
| N065A00    | Generalised arthritis           | 1                 |
| N05000     | Generalised OA-site unspecif.   | 1                 |
| N0500      | Generalised OA-site unspecif.   | 1                 |
| N050200    | Generalised OA-multiple sites   | 1                 |
| N0502      | Generalised OA-multiple sites   | 1                 |
| N0501      | Generalised OA-hand             | 1                 |
| N224z      | Ganglion/synovial cyst NOS      | 1                 |
| N224       | Ganglion/synov.cyst - knee      | 1                 |
| N224-92    | Ganglion/synov.cyst - knee      | 1                 |
| N2243      | Ganglion unspecified            | 1                 |
| N2245      | Ganglion of wrist               | 1                 |
| N2242      | Ganglion of tendon sheath       | 1                 |
| N2246      | Ganglion of knee                | 1                 |
| N2241      | Ganglion of joint               | 1                 |
| N224C      | Ganglion of foot                | 1                 |
| EMISR4QFU2 | Fusion Of Lumbar Spine          | 1                 |
| EMISR4QFU1 | Fusion Of Cervical Spine        | 1                 |
| N2115      | Full thickn rotator cuff tear   | 1                 |
| N210-2     | Frozen shoulder                 | 1                 |
| N331N      | Fragility fracture              | 1                 |
| N331M      | Fragility # unsp osteoporosis   | 1                 |
| S10B       | Fracture/lumbar spine+pelvis    | 1                 |
| S10A1      | Fracture/2nd cervical vertebra  | 1                 |
| S10A0      | Fracture/1st cervical vertebra  | 1                 |
| S15        | Fracture of thoracic vertebra   | 1                 |
| S1z        | Fracture of neck and trunk NOS  | 1                 |
| S1         | Fracture of neck and trunk      | 1                 |
| S10A       | Fracture of neck                | 1                 |

| Read code | Description                       | Number of studies |
|-----------|-----------------------------------|-------------------|
| S10B0     | Fracture of lumbar vertebra       | 1                 |
| N338z     | Fracture malunion or nonunion NOS | 1                 |
| SR1       | Fracture involv multi body reg    | 1                 |
| SR10      | Fracture involv head with neck    | 1                 |
| S4        | Fracture dislocation/subluxat     | 1                 |
| OX8056    | Fracture Spine /ox                | 1                 |
| S3z       | Fracture NOS                      | 1                 |
| OXL8056LV | Fracture Lumbar Vertebra /ox      | 1                 |
| SR16      | Fract/thorx with lw bck+plv+lmb   | 1                 |
| N3317     | Fract of bone in neoplast dis     | 1                 |
| N2451     | Foot pain                         | 1                 |
| N245-3    | Foot pain                         | 1                 |
| 1M11      | Foot pain                         | 1                 |
| N220B     | Flexor tenosynovitis of finger    | 1                 |
| N3660     | Flexion deformity of knee         | 1                 |
| N369      | Flexion deformity                 | 1                 |
| N084A     | Flexion contracture-shoulder      | 1                 |
| N084a     | Flexion contracture-knee          | 1                 |
| N374E     | Flatback syndrome                 | 1                 |
| N040T     | Flare of rheumatoid arthritis     | 1                 |
| N08yA     | Flail joint                       | 1                 |
| N09C      | Fistula of joint                  | 1                 |
| N2450-2   | Finger pain                       | 1                 |
| N05z4-1   | Finger osteoarthritis NOS         | 1                 |
| N2163     | Fibular collat.lig.bursitis       | 1                 |
| N3324     | Fibrous cortical defect           | 1                 |
| N2405     | Fibrositis of neck                | 1                 |
| N00y1     | Fibrosclerosis systemic           | 1                 |
| N087      | Fibrocartilage lesion of joint    | 1                 |
| MHTBAFH1  | Fh: Osteoporosis                  | 1                 |
| N041      | Felty's syndrome                  | 1                 |
| N1y1      | Fatigue fracture of vertebra      | 1                 |
| N244      | Fasciitis unspecified             | 1                 |
| N024      | Familial chondrocalcinosis        | 1                 |
| N14y      | Facet joint syndrome              | 1                 |
| 1211      | FH: Rheumatoid arthritis          | 1                 |
| 1268      | FH: Osteoporosis                  | 1                 |
| 1212      | FH: Osteoarthritis                | 1                 |
| 121Z      | FH: Musculo-skeletal dis. NOS     | 1                 |
| 121       | FH: Arthritis                     | 1                 |
| N220D     | Extensor tenosynovitis of wrist   | 1                 |
| N220F     | Extensor tenosynovitis of thumb   | 1                 |
| N220E     | Extensor tenosynovitis of finger  | 1                 |
| N084B     | Extension contracture-shoulder    | 1                 |
| N084F     | Ext rotat contracture-shoulder    | 1                 |
| N21z7     | Exostosis                         | 1                 |
| 16C8      | Exacerbation of backache          | 1                 |
| N0506     | Erosive osteoarthrosis            | 1                 |
| N32z1     | Epiphysitis NOS                   | 1                 |
| N33z1     | Epiphyseal arrest                 | 1                 |
| N00y0     | Eosinophilic fasciitis            | 1                 |
| N216      | Enthesopathy of knee              | 1                 |
| N21z      | Enthesopathy NOS                  | 1                 |

1  
2  
3  
4  
5  
6  
7  
8  
9  
10  
11  
12  
13  
14  
15  
16  
17  
18  
19  
20  
21  
22  
23  
24  
25  
26  
27  
28  
29  
30  
31  
32  
33  
34  
35  
36  
37  
38  
39  
40  
41  
42  
43  
44  
45  
46  
47  
48  
49  
50  
51  
52  
53  
54  
55  
56  
57  
58  
59  
60

| Read code | Description                        | Number of studies |
|-----------|------------------------------------|-------------------|
| N11y1     | Enterobacterial spondylitis        | 1                 |
| 1M00-1    | Elbow pain                         | 1                 |
| 1M00      | Elbow pain                         | 1                 |
| N05z2     | Elbow osteoarthritis NOS           | 1                 |
| N06z2     | Elbow arthritis NOS                | 1                 |
| N090B     | Effusion of sternoclav joint       | 1                 |
| N090A     | Effusion of shoulder               | 1                 |
| N0909     | Effusion of multiple joints        | 1                 |
| N090M     | Effusion of knee                   | 1                 |
| N090z     | Effusion of joint NOS              | 1                 |
| N090      | Effusion of joint                  | 1                 |
| N090C     | Effusion of acromioclav joint      | 1                 |
| N0906     | Effusion - knee joint              | 1                 |
| N0906-99  | Effusion - knee joint              | 1                 |
| N3840     | Dysplastic spondylolisthesis       | 1                 |
| N2361     | Dupuyt dis-palm + nod no cont      | 1                 |
| N3305     | Drug-induced osteoporosis          | 1                 |
| N0002     | Drug-ind systemic lupus eryth      | 1                 |
| N3315     | Drug-ind osteopor + path fract     | 1                 |
| N235      | Double-jointed (hypermobility)     | 1                 |
| N1123     | Dorsal spondylo w/o myelopath      | 1                 |
| N3370     | Disuse atrophy of bone             | 1                 |
| N3304     | Dissuse osteoporosis               | 1                 |
| N0000     | Disseminated lupus erythemat.      | 1                 |
| N09AX     | Disorder of patella unspecified    | 1                 |
| N33zG     | Disorder of cartilage, unspec      | 1                 |
| N33zF     | Disorder of bone unspecified       | 1                 |
| S46       | Dislocation or subluxation of knee | 1                 |
| S4z       | Dislocation or subluxation NOS     | 1                 |
| S41z      | Dislocation of shoulder NOS        | 1                 |
| S46z      | Dislocation of knee NOS            | 1                 |
| S41       | Dislocated shoulder                | 1                 |
| S463-99   | Dislocated patella                 | 1                 |
| SR20      | Disloc,sprns+strns inv hd+neck     | 1                 |
| SR2       | Dislc,sprns+strns/mult bdy reg     | 1                 |
| N071B     | Discoid lateral meniscus           | 1                 |
| N123      | Disc unsp.displ.-no myelopathy     | 1                 |
| N12B      | Disc prolapse with myelopathy      | 1                 |
| N12C      | Disc prolapse + radiculopathy      | 1                 |
| N12zz     | Disc disorders NOS                 | 1                 |
| N129z     | Disc disorder+myelopathy NOS       | 1                 |
| N00       | Diffuse connective tissue dis.     | 1                 |
| N097z     | Difficulty in walking NOS          | 1                 |
| N097      | Difficulty in walking              | 1                 |
| N23yA     | Diastasis of muscle                | 1                 |
| N33z3     | Diaphysitis                        | 1                 |
| N0300     | Diabetic cheiroarthropathy         | 1                 |
| N0301     | Diabetic Charcot arthropathy       | 1                 |
| N003X     | Dermatopolymyositis, unspec        | 1                 |
| N0031     | Dermatopolymyosit,neoplast dis     | 1                 |
| N003      | Dermatomyositis                    | 1                 |
| SC0z      | Delayed union of fracture          | 1                 |
| N3386     | Delayed union of fracture          | 1                 |

| Read code | Description                     | Number of studies |
|-----------|---------------------------------|-------------------|
| S9030     | Degloving injury,shoulder area  | 1                 |
| SA130     | Degloving injury knee           | 1                 |
| N3842     | Degenerative spondylolisthesis  | 1                 |
| N128      | Degenerative disc disease NOS   | 1                 |
| N1404     | Degenerativ th spinal stenosis  | 1                 |
| N1408     | Degenerativ lu spinal stenosis  | 1                 |
| N1301     | Degenerativ Cx spinal stenosis  | 1                 |
| N114      | Degeneration of lumbar spine    | 1                 |
| N114-1    | Degeneration of lumbar spine    | 1                 |
| N0721     | Degen lesion artic cart knee    | 1                 |
| N36y4     | Deformity of scapula            | 1                 |
| N36yD     | Deformity of patella            | 1                 |
| N36y3     | Deformity of clavicle           | 1                 |
| N36y2     | Deformity of bone               | 1                 |
| N224D     | Cyst of tendon sheath           | 1                 |
| N0722     | Cyst of semilunar cartilage     | 1                 |
| N0709     | Cyst of medial meniscus         | 1                 |
| N071A     | Cyst of lateral meniscus        | 1                 |
| N2244     | Cyst of bursa                   | 1                 |
| N332z     | Cyst of bone NOS                | 1                 |
| N332      | Cyst of bone                    | 1                 |
| N11A      | Cx spondyl + vasc compression   | 1                 |
| N1303     | Cx spin stenosis due to oth dis | 1                 |
| N12C0     | Cx disc prolapse+radiculopathy  | 1                 |
| N12B0     | Cx disc prolapse + myelopathy   | 1                 |
| N3740     | Curvature of spine unspecified  | 1                 |
| N37zz     | Curvature of spine NOS          | 1                 |
| N37z      | Curvature of spine NOS          | 1                 |
| N37       | Curvature of spine              | 1                 |
| N02zK     | Crystal arthropathy NOS-knee    | 1                 |
| N02zz     | Crystal arthropathy NOS         | 1                 |
| N02z      | Crystal arthropathy NOS         | 1                 |
| N02z0     | Crystal arthr.NOS-site unspec.  | 1                 |
| N02z1     | Crystal arthr.NOS-shoulder      | 1                 |
| N02zy     | Crystal arthr.NOS-other spec.   | 1                 |
| N02zx     | Crystal arthr.NOS-multipl.site  | 1                 |
| N02z9     | Cryst arthr NOS-sternoclav jt   | 1                 |
| N02zA     | Cryst arthr NOS-acromioclav jt  | 1                 |
| N02z8     | Crys arthr NOS-shoulder         | 1                 |
| SF20z     | Crushinjuryshlder+uparmNOS      | 1                 |
| SFz       | Crushing injury NOS             | 1                 |
| SF        | Crushing injury                 | 1                 |
| SF40      | Crush injury multiple sites NEC | 1                 |
| SF021     | Crush injury larynx             | 1                 |
| SF311     | Crush injury knee               | 1                 |
| SF110     | Crush injury back               | 1                 |
| SF4z      | Crush injury                    | 1                 |
| N13y2     | Crick in neck                   | 1                 |
| N2472     | Cramp                           | 1                 |
| N051A     | Coxarthr from dysplasia, bilat  | 1                 |
| N3216     | Coxa plana                      | 1                 |
| 182B0     | Costal margin chest pain        | 1                 |
| N2123     | Coracoid impingement            | 1                 |



1  
2  
3  
4  
5  
6  
7  
8  
9  
10  
11  
12  
13  
14  
15  
16  
17  
18  
19  
20  
21  
22  
23  
24  
25  
26  
27  
28  
29  
30  
31  
32  
33  
34  
35  
36  
37  
38  
39  
40  
41  
42  
43  
44  
45  
46  
47  
48  
49  
50  
51  
52  
53  
54  
55  
56  
57  
58  
59  
60

| Read code | Description                          | Number of studies |
|-----------|--------------------------------------|-------------------|
| S502      | Coracohumeral sprain                 | 1                 |
| SE30z     | Contusionshlder+uer arm NOS          | 1                 |
| SE44      | Contusionlwr limbmlti sites          | 1                 |
| SE00      | Contusion, forehead                  | 1                 |
| SEz       | Contusion with skin intact NOS       | 1                 |
| SE30      | Contusion shoulder or upper arm      | 1                 |
| SE300     | Contusion shoulder area              | 1                 |
| SE301     | Contusion scapular area              | 1                 |
| SE231     | Contusion of lower back              | 1                 |
| SE232     | Contusion of lower back              | 1                 |
| SE4y      | Contusion multiple sites NEC         | 1                 |
| SE41z     | Contusion knee and lower leg NOS     | 1                 |
| SE411     | Contusion knee                       | 1                 |
| SE0z      | Contusion face scalp+neck NOS        | 1                 |
| SE304     | Contusion clavicular area            | 1                 |
| SE23z     | Contusion back NOS                   | 1                 |
| SE        | Contusion (bruise) with intact skin  | 1                 |
| N22y0     | Contracture of tendon sheath         | 1                 |
| N23yC     | Contracture of muscle                | 1                 |
| N0849     | Contracture of multiple joints       | 1                 |
| N084z     | Contracture of joint NOS             | 1                 |
| N084      | Contracture of joint                 | 1                 |
| N         | Connective tissue diseases           | 1                 |
| N3y04     | Connect tiss sten neural canal       | 1                 |
| PE1       | Congenital sternomastoid torticollis | 1                 |
| N3y07     | Con tis/disc sten intervrt for       | 1                 |
| N33C      | Complex regionl pain syndrom I       | 1                 |
| S5C       | Complete tear, knee ligament         | 1                 |
| S58z      | Complete tear shoulder joint NOS     | 1                 |
| S58       | Complete tear shoulder joint         | 1                 |
| N33z8     | Complete epiphyseal arrest           | 1                 |
| N33z6     | Compensatory hypertrophy-bone        | 1                 |
| SK0y      | Compartmentsyndrome                  | 1                 |
| S5A0D     | Comp tr shrt intr lig non-sp         | 1                 |
| N331D     | Collapsed vertebra NOS               | 1                 |
| N331      | Collapse of vertebra NOS             | 1                 |
| N331F     | Collapse of thoracic vertebra        | 1                 |
| N3310     | Collapse of thoracic vertebra        | 1                 |
| N3311     | Collapse of lumbar vertebra          | 1                 |
| N331G     | Collapse of lumbar vertebra          | 1                 |
| N331E     | Collapse of cervical vertebra        | 1                 |
| N331L     | Collap vert due osteopor NOS         | 1                 |
| N331J     | Collap lumb vert due to osteo        | 1                 |
| N331H     | Collap cerv vert due to osteop       | 1                 |
| N00z      | Collagen disease NOS                 | 1                 |
| N331K     | Coll thorac vert due osteopor        | 1                 |
| N147z     | Coccyx disorder NOS                  | 1                 |
| N1472     | Coccygodynia                         | 1                 |
| S5E1      | Cmplt tr,thyroid region lgmt         | 1                 |
| S5E30     | Cmplt tr,sternoclavicular lgmt       | 1                 |
| S5Ez      | Cmplt tr,other lgmt NOS              | 1                 |
| S5Cy      | Cmplt tr,other knee lgmt             | 1                 |
| S5C1      | Cmplt tr,knee,mdl collat lgmt        | 1                 |

| Read code | Description                    | Number of studies |
|-----------|--------------------------------|-------------------|
| S5C0      | Cmplt tr,knee,lat collat lgmt  | 1                 |
| S5Cz      | Cmplt tr,knee lgmt NOS         | 1                 |
| S581      | Cmplt tr,coraco-clav lgmt      | 1                 |
| S580      | Cmplt tr,acromio-clav lgmt     | 1                 |
| S5A0A     | Cmplt tr triang fibrocartilage | 1                 |
| S5C3      | Cmpl tr,knee,ant cruciate lgmt | 1                 |
| S5y57     | Cmpl tear,lumbosacral lgmt     | 1                 |
| S5y56     | Cmpl tear,iliolumbar lgmt      | 1                 |
| S5C2      | Cmp tr,knee,post cruciate lgmt | 1                 |
| S2920     | Clsd mult fract clav scap hum  | 1                 |
| S1000     | Clsd # unsp cerv vertebra      | 1                 |
| S1024     | Clsd # thorc vert-trnsvrs prcs | 1                 |
| S1026     | Clsd # thorc vert - tricolumnr | 1                 |
| S1025     | Clsd # thorc vert - post prcs  | 1                 |
| S1020     | Clsd # thoracic vert, burst    | 1                 |
| S1021     | Clsd # thoracic vert wedge     | 1                 |
| S102z     | Clsd # thorac vert NOS         | 1                 |
| S1023     | Clsd # thor vert-spinous prcss | 1                 |
| S1003     | Clsd # third cerv vertebra     | 1                 |
| S2102     | Clsd # scapula, coracoid       | 1                 |
| S1041     | Clsd # lumbar vert wedge       | 1                 |
| S1040     | Clsd # lumbar vert burst       | 1                 |
| S1046     | Clsd # lumb vert - tricolumnar | 1                 |
| S1004     | Clsd # fourth cerv vertebra    | 1                 |
| S1005     | Clsd # fifth cerv vertebra     | 1                 |
| S2001     | Clsd # clavicle medial end     | 1                 |
| S2003     | Clsd # clavical lateral end    | 1                 |
| S100H     | Clsd # cerv vert, wedge        | 1                 |
| S100G     | Clsd # cerv vert, burst        | 1                 |
| S100z     | Clsd # cerv spine NOS          | 1                 |
| S100F     | Clsd # axis, tricolumnar       | 1                 |
| S100D     | Clsd # axis, transvrse process | 1                 |
| S100B     | Clsd # axis, spondylolysis     | 1                 |
| S100C     | Clsd # axis, spinous process   | 1                 |
| S100E     | Clsd # axis, posterior arch    | 1                 |
| S100A     | Clsd # axis odontoid process   | 1                 |
| S1009     | Clsd # atlas, comminuted       | 1                 |
| S1106     | Clsd # C5-C7 unspec cord les   | 1                 |
| S110A     | Clsd # C5-C7 post cord lesion  | 1                 |
| S110B     | Clsd # C5-C7 incomp cord les   | 1                 |
| S1107     | Clsd # C5-C7 complete cord les | 1                 |
| S1109     | Clsd # C5-C7 cent cord lesion  | 1                 |
| S1108     | Clsd # C5-C7 ant cord lesion   | 1                 |
| S1100     | Clsd # C1-C4 unspec cord les   | 1                 |
| S1104     | Clsd # C1-C4 post cord lesion  | 1                 |
| S1105     | Clsd # C1-C4 incomp cord les   | 1                 |
| S1101     | Clsd # C1-C4 complete cord les | 1                 |
| S1103     | Clsd # C1-C4 cent cord lesion  | 1                 |
| S1102     | Clsd # C1-C4 ant cord lesion   | 1                 |
| S4120     | Cls trmtc subluxatn shldr jnt  | 1                 |
| S4696     | Cls trmtc sublux,head fibula   | 1                 |
| S467      | Cls trmtc sublux pat-fem jt    | 1                 |
| S4690     | Cls trmtc sublux knee jt,unsp  | 1                 |

1  
2  
3  
4  
5  
6  
7  
8  
9  
10  
11  
12  
13  
14  
15  
16  
17  
18  
19  
20  
21  
22  
23  
24  
25  
26  
27  
28  
29  
30  
31  
32  
33  
34  
35  
36  
37  
38  
39  
40  
41  
42  
43  
44  
45  
46  
47  
48  
49  
50  
51  
52  
53  
54  
55  
56  
57  
58  
59  
60

| Read code | Description                     | Number of studies |
|-----------|---------------------------------|-------------------|
| S4692     | Cls trmtc sublux knee jt,post   | 1                 |
| S4694     | Cls trmtc sublux knee jt,ltrl   | 1                 |
| S4691     | Cls trmtc sublux knee jt,ant    | 1                 |
| S469      | Cls trmtc sublux knee jt        | 1                 |
| S4102     | Cls trmtc dsclctn shldr jtpost  | 1                 |
| S410z     | Cls trmtc dsclctn shoulder NOS  | 1                 |
| S49E4     | Cls trm sublux,st-clav jt,post  | 1                 |
| S49E3     | Cls trm sublux,st-clav jt,ant   | 1                 |
| S49E2     | Cls trm sublux st-clav jt       | 1                 |
| S4671     | Cls trm sublux pat-fem jt,med   | 1                 |
| S4670     | Cls trm sublux pat-fem jt,ltrl  | 1                 |
| S49E5     | Cls trm sublux laryngl cart     | 1                 |
| S4695     | Cls trm sublux knee jt,rotatry  | 1                 |
| S4693     | Cls trm sublux knee jt,medial   | 1                 |
| S4121     | Cls trm sublux acromio-clav jt  | 1                 |
| S4656     | Cls trm dsclctn, head fibula    | 1                 |
| S4631     | Cls trm dsclctn pat-fem jt,med  | 1                 |
| S4630     | Cls trm dsclctn pat-fem jt,lat  | 1                 |
| S4650     | Cls trm dsclctn knee, unspc     | 1                 |
| S4654     | Cls trm dsclctn knee jt,lateral | 1                 |
| S4652     | Cls trm dsclctn knee jt, post   | 1                 |
| S4653     | Cls trm dsclctn knee jt, medial | 1                 |
| S4651     | Cls trm dsclctn knee jt, ant    | 1                 |
| S465z     | Cls trm dsclctn knee NOS        | 1                 |
| S4655     | Cls trm dsclct knee jt,rotatory | 1                 |
| S4963     | Cls trm dscl, stern-clav jt,ant | 1                 |
| S4962     | Cls trm dscl sterno-clav jt     | 1                 |
| S4965     | Cls trm dscl laryngl cartilage  | 1                 |
| S4964     | Cls trm dsl, stern-clav jt,post | 1                 |
| S412      | Cls traumtc subluxatn shoulder  | 1                 |
| S410      | Cls traumtc dsclctn shoulder    | 1                 |
| S4105     | Cls traumatic dsclctn scapula   | 1                 |
| S49A      | Cls sublux thrcic+lumbar spine  | 1                 |
| S49A1     | Cls sublux thrcic spine         | 1                 |
| S49Az     | Cls sublux thrc+lmbr spine NOS  | 1                 |
| S498x     | Cls sublux mlti cerv vertebrae  | 1                 |
| S4980     | Cls sublux cervical spine,unsp  | 1                 |
| S498      | Cls sublux cervical spine       | 1                 |
| S498z     | Cls sublux cerv vertebra NOS    | 1                 |
| S4981     | Cls sublux atlanto-occipitl jt  | 1                 |
| S4982     | Cls sublux atlanto-axial jt     | 1                 |
| S492C     | Cls spnl dsclc+cauda equina lsn | 1                 |
| S4924     | Cls spnl dsclc+ant thrc crd lsn | 1                 |
| S4929     | Cls spnl dsclc+ant lmbr crd lsn | 1                 |
| S490B     | Cls spnl dsclc+ant cerv crd lsn | 1                 |
| S492B     | Cls spnl dsl+post lmbr crd lsn  | 1                 |
| S4923     | Cls spnl dsl+comp thrc crd lsn  | 1                 |
| S4928     | Cls spnl dsl+comp lmbr crd lsn  | 1                 |
| S4922     | Cls spn dsclc+thrc crd lsn,unsp | 1                 |
| S4926     | Cls spn dsclc+post thrc crd lsn | 1                 |
| S490D     | Cls spn dsclc+post cerv crd lsn | 1                 |
| S4925     | Cls spn dsclc+cent thrc crd lsn | 1                 |
| S492A     | Cls spn dsclc+cent lmbr crd lsn | 1                 |

1  
2  
3  
4  
5  
6  
7  
8  
9  
10  
11  
12  
13  
14  
15  
16  
17  
18  
19  
20  
21  
22  
23  
24  
25  
26  
27  
28  
29  
30  
31  
32  
33  
34  
35  
36  
37  
38  
39  
40  
41  
42  
43  
44  
45  
46  
47  
48  
49  
50  
51  
52  
53  
54  
55  
56  
57  
58  
59  
60

| Read code | Description                                              | Number of studies |
|-----------|----------------------------------------------------------|-------------------|
| S1140     | Cls spn # + unsp lumb crd lesn                           | 1                 |
| S1144     | Cls spn # + post lumb crd lesn                           | 1                 |
| S1141     | Cls spn # + comp lumb crd lesn                           | 1                 |
| S1143     | Cls spn # + cent lumb crd lesn                           | 1                 |
| S1145     | Cls spn # + cauda equina lesn                            | 1                 |
| S1142     | Cls spn # + ant lumbr crd lesn                           | 1                 |
| SR100     | Cls fract invol head with neck                           | 1                 |
| S492z     | Cls dslc thrcic+lmbr spine NOS                           | 1                 |
| S492      | Cls dslc thoracic+lumbar spine                           | 1                 |
| S4921     | Cls dslc thoracic vertebra                               | 1                 |
| S4920     | Cls dslc lumbar spine                                    | 1                 |
| S4901     | Cls dslc atlanto-occipital jnt                           | 1                 |
| S4902     | Cls dslc atlanto-axial joint                             | 1                 |
| S4F6      | Cls #-sublux,patello-fem jt                              | 1                 |
| S4J23     | Cls #-sublux st-clav jt,post                             | 1                 |
| S4J22     | Cls #-sublux st-clav jt,ant                              | 1                 |
| S4F4      | Cls #-dslc,patello-fem jt                                | 1                 |
| S4J03     | Cls #-dslc st-clav jt,post                               | 1                 |
| S4J02     | Cls #-dslc st-clav jt,ant                                | 1                 |
| S1022     | Cls # thorc vert-spondylolysis                           | 1                 |
| S1044     | Cls # lumbr vert-trnsvrse prcs                           | 1                 |
| S1042     | Cls # lumbr vert-spondylolysis                           | 1                 |
| S1043     | Cls # lumbr vert-spinous prcss                           | 1                 |
| S1045     | Cls # lumb vert-posterior arch                           | 1                 |
| S100L     | Cls # cerv vert, trnsvrse prcs                           | 1                 |
| S100N     | Cls # cerv vert, tricolumnar                             | 1                 |
| S100J     | Cls # cerv vert, spondylolysis                           | 1                 |
| S100K     | Cls # cerv vert, spinous prcss                           | 1                 |
| S100M     | Cls # cerv vert, post arch                               | 1                 |
| S1008     | Cls # atlas-isol arch/art prcs                           | 1                 |
| S412z     | Closed traumatic subluxation shoulder NOS                | 1                 |
| S496z     | Closed traumatic disloctn NOS                            | 1                 |
| S4100     | Closed traumatic dislocation shoulder joint, unspecified | 1                 |
| S463      | Closed traumatic dislocation of patello-femoral joint    | 1                 |
| S112z     | Closed thoracic#+cord lesn.NOS                           | 1                 |
| S112      | Closed thoracic #+cord lesion                            | 1                 |
| S49Cz     | Closed subluxation spine NOS                             | 1                 |
| S49A0     | Closed subluxation lumbar spine                          | 1                 |
| S4988     | Closed subluxation C7/T1                                 | 1                 |
| S4987     | Closed subluxation C6/C7                                 | 1                 |
| S4986     | Closed subluxation C5/C6                                 | 1                 |
| S4985     | Closed subluxation C4/C5                                 | 1                 |
| S4984     | Closed subluxation C3/C4                                 | 1                 |
| S4983     | Closed subluxation C2/C3                                 | 1                 |
| S49C0     | Closed sublux spine, unsp                                | 1                 |
| S49C      | Closed sublux other vertebra                             | 1                 |
| S026      | Closed orbital blow-out fracture                         | 1                 |
| S114      | Closed lumbar # + cord lesion                            | 1                 |
| S102      | Closed fracture thoracic vertebra                        | 1                 |
| S2104     | Closed fracture scapula, blade                           | 1                 |
| S2105     | Closed fracture scapula spine                            | 1                 |
| S2106     | Closed fracture scapula neck                             | 1                 |

1  
2  
3  
4  
5  
6  
7  
8  
9  
10  
11  
12  
13  
14  
15  
16  
17  
18  
19  
20  
21  
22  
23  
24  
25  
26  
27  
28  
29  
30  
31  
32  
33  
34  
35  
36  
37  
38  
39  
40  
41  
42  
43  
44  
45  
46  
47  
48  
49  
50  
51  
52  
53  
54  
55  
56  
57  
58  
59  
60

| Read code | Description                                    | Number of studies |
|-----------|------------------------------------------------|-------------------|
| S2103     | Closed fracture scapula glenoid                | 1                 |
| S2101     | Closed fracture scapula acromion               | 1                 |
| S3204     | Closed fracture patella, comminuted (stellate) | 1                 |
| S320      | Closed fracture of the patella                 | 1                 |
| S1250     | Closed fracture larynx                         | 1                 |
| S2002     | Closed fracture clavicle shaft                 | 1                 |
| S1002     | Closed fracture axis                           | 1                 |
| S1001     | Closed fracture atlas                          | 1                 |
| S4940     | Closed dislocation spine unsp.                 | 1                 |
| S494z     | Closed dislocation spine NOS                   | 1                 |
| S490      | Closed dislocation cervical spine              | 1                 |
| S4908     | Closed dislocation C7/T1                       | 1                 |
| S4907     | Closed dislocation C6/C7                       | 1                 |
| S4906     | Closed dislocation C5/C6                       | 1                 |
| S4905     | Closed dislocation C4/C5                       | 1                 |
| S4904     | Closed dislocation C3/C4                       | 1                 |
| S4903     | Closed dislocation C2/C3                       | 1                 |
| S494      | Closed disloc.other vertebra                   | 1                 |
| S490x     | Closed disloc.mult.cerv.vert.                  | 1                 |
| S490z     | Closed disloc.cervic.vert.NOS                  | 1                 |
| S4900     | Closed disloc.cerv.spine unsp.                 | 1                 |
| S4960     | Closed disloc sternoclavic. jt                 | 1                 |
| S4104     | Closed disloc acromioclavic.jt                 | 1                 |
| S110z     | Closed cervical#+cord lesn.NOS                 | 1                 |
| S110      | Closed cervical#+cord lesion                   | 1                 |
| S1253     | Closed #trachea                                | 1                 |
| S1252     | Closed #thyroid cartilage                      | 1                 |
| S11x      | Closed #spine+cord lesn.unsp.                  | 1                 |
| S2100     | Closed #scapula-unspecified                    | 1                 |
| S210z     | Closed #scapula NOS                            | 1                 |
| S125z     | Closed #larynx/trachea NOS                     | 1                 |
| S1251     | Closed #hyoid bone                             | 1                 |
| S2000     | Closed #clavicle unspecified                   | 1                 |
| S200z     | Closed #clavicle NOS                           | 1                 |
| S3z0      | Closed #bones unspecified                      | 1                 |
| S4F2      | Closed #-sublux, knee joint                    | 1                 |
| S4A20     | Closed #-sublux shoulder joint                 | 1                 |
| S4A2      | Closed #-sublux shoulder                       | 1                 |
| S4A21     | Closed #-sublux acrom-clav jt                  | 1                 |
| S4A00     | Closed #-dslc shoulder joint                   | 1                 |
| S4A0      | Closed #-dslc shoulder                         | 1                 |
| S4F0      | Closed #-dslc knee joint                       | 1                 |
| S4A01     | Closed #-dslc acrom-clav joint                 | 1                 |
| S10x      | Closed # spine unspecif                        | 1                 |
| S210      | Closed # scapula                               | 1                 |
| S3201     | Closed # patella,proximal pole                 | 1                 |
| S3203     | Closed # patella, vertical                     | 1                 |
| S3200     | Closed # patella transverse                    | 1                 |
| S3202     | Closed # patella distal pole                   | 1                 |
| S200      | Closed # clavicle                              | 1                 |
| S100      | Closed # cervical spine                        | 1                 |
| N063000   | Climacteric arthr.-site unsp.                  | 1                 |
| N0630     | Climacteric arthr.-site unsp.                  | 1                 |

| Read code | Description                                            | Number of studies |
|-----------|--------------------------------------------------------|-------------------|
| N0631     | Climacteric arthr.-shoulder                            | 1                 |
| N0638     | Climacteric arthr.-other spec.                         | 1                 |
| N063800   | Climacteric arthr.-other spec.                         | 1                 |
| N0639     | Climacteric arthr.-multip.site                         | 1                 |
| N063900   | Climacteric arthr.-multip.site                         | 1                 |
| N063z     | Climacteric arthr.-NOS                                 | 1                 |
| N063z00   | Climacteric arthr.-NOS                                 | 1                 |
| N0991     | Clicking sternoclavic joint                            | 1                 |
| N0990     | Clicking shoulder                                      | 1                 |
| N099C     | Clicking knee                                          | 1                 |
| N099      | Clicking joint                                         | 1                 |
| N0992     | Clicking acromioclavicular joint                       | 1                 |
| N33A1     | Clavicle pain                                          | 1                 |
| S490A     | Cl spnl dslc+comp cerv crd lsn                         | 1                 |
| S4909     | Cl spnl dslc+cerv crd lsn,unsp                         | 1                 |
| S49A2     | Cl spn sublx+thrc crd lsn,unsp                         | 1                 |
| S49A6     | Cl spn sublx+post thrc crd lsn                         | 1                 |
| S49AB     | Cl spn sublx+post lmb crd lsn                          | 1                 |
| S49A7     | Cl spn sublx+lmb crd lsn,unsp                          | 1                 |
| S49A3     | Cl spn sublx+comp thrc crd lsn                         | 1                 |
| S49A8     | Cl spn sublx+comp lmb crd lsn                          | 1                 |
| S498A     | Cl spn sublx+comp cerv crd lsn                         | 1                 |
| S498C     | Cl spn sublx+cntrl crv crd lsn                         | 1                 |
| S4989     | Cl spn sublx+cerv crd lsn,unsp                         | 1                 |
| S49A5     | Cl spn sublx+cent thrc crd lsn                         | 1                 |
| S49AA     | Cl spn sublx+cent lmb crd lsn                          | 1                 |
| S49AC     | Cl spn sublx+cauda equina lsn                          | 1                 |
| S49A4     | Cl spn sublx+ant thrc crd lsn                          | 1                 |
| S49A9     | Cl spn sublx+ant lmb crd lsn                           | 1                 |
| S498D     | Cl spn sublux+post crv crd lsn                         | 1                 |
| S498B     | Cl spn sublux+ant cerv crd lsn                         | 1                 |
| S490C     | Cl spn dslc+cntrl cerv crd lsn                         | 1                 |
| S4927     | Cl spn dsl+lmb crd lsn unsp                            | 1                 |
| S1124     | Cl spn #+pst thor crd lsn,T1-6                         | 1                 |
| S1123     | Cl spn #+cnt thor crd lsn,T1-6                         | 1                 |
| S1122     | Cl spn #+ant thor crd lsn,T1-6                         | 1                 |
| S1120     | Cl sp #+unsp thor crd lsn,T1-6                         | 1                 |
| S1126     | Cl sp #+unsp thor cd lsn,T7-12                         | 1                 |
| S112A     | Cl sp #+pst thor crd lsn,T7-12                         | 1                 |
| S1129     | Cl sp #+cnt thor crd lsn,T7-12                         | 1                 |
| S1121     | Cl sp #+cml thor crd lsn,T1-6                          | 1                 |
| S1127     | Cl sp #+cml thor crd lsn,T7-12                         | 1                 |
| S1128     | Cl sp #+ant thor crd lsn,T7-12                         | 1                 |
| S1500     | Cl multi fractur of thor spine                         | 1                 |
| SR160     | Cl fract/th wth lw bck+plv+lmb                         | 1                 |
| S112B     | Cl # T7-12incomp cord lsn NOS                          | 1                 |
| S1125     | Cl # T1-6 incmpl cord lesn NOS                         | 1                 |
| N301B     | Chronic osteomyelitis-th spine                         | 1                 |
| N301C     | Chronic osteomyelitis-lu spine                         | 1                 |
| N301A     | Chronic osteomyelitis-Cx spine                         | 1                 |
| N301      | Chronic osteomyelitis                                  | 1                 |
| C052*     | Chronic lymphocytic thyroiditis (Hashimotos's disease) | 1                 |

1  
2  
3  
4  
5  
6  
7  
8  
9  
10  
11  
12  
13  
14  
15  
16  
17  
18  
19  
20  
21  
22  
23  
24  
25  
26  
27  
28  
29  
30  
31  
32  
33  
34  
35  
36  
37  
38  
39  
40  
41  
42  
43  
44  
45  
46  
47  
48  
49  
50  
51  
52  
53  
54  
55  
56  
57  
58  
59  
60

| Read code | Description                             | Number of studies |
|-----------|-----------------------------------------|-------------------|
| 16C9      | Chronic low back pain                   | 1                 |
| N090X     | Chronic joint effusion                  | 1                 |
| N3682     | Chronic instability of knee             | 1                 |
| OX7289CB  | Chronic Backache /ox                    | 1                 |
| N3010     | Chron.osteomyelitis-site unsp.          | 1                 |
| N3011     | Chron.osteomyelitis-shoulder            | 1                 |
| N3018     | Chron.osteomyelitis-other spec          | 1                 |
| N3019     | Chron.osteomyelitis-mult.site           | 1                 |
| N301z     | Chron.osteomyelitis NOS                 | 1                 |
| N301L     | Chron multifocal osteomyelitis          | 1                 |
| N301M     | Chr osteomyel + draining sinus          | 1                 |
| N074      | Chondromalacia patellae                 | 1                 |
| N33z2     | Chondromalacia NOS                      | 1                 |
| N33zB     | Chondrolysis                            | 1                 |
| N022      | Chondrocalcinosis unspecified           | 1                 |
| N022z     | Chondrocalcinosis NOS                   | 1                 |
| N02       | Chondrocalcinosis                       | 1                 |
| N0220     | Chondrocalc.unsp.-site unspec.          | 1                 |
| N0221     | Chondrocalc.unsp.-shoulder reg          | 1                 |
| N022y     | Chondrocalc.unsp.-other spec.           | 1                 |
| N022x     | Chondrocalc.unsp.-multipl.site          | 1                 |
| N020z     | Chondrocalc.dicalc.phos.NOS             | 1                 |
| N021      | Chondrocalc.-pyrophosph.cryst.          | 1                 |
| N021z     | Chondrocalc.-pyrophosph.NOS             | 1                 |
| N020      | Chondrocalc.-dicalc.phos.cryst          | 1                 |
| N0210     | Chondroc.-pyrophos.-site unsp.          | 1                 |
| N0211     | Chondroc.-pyrophos.-shoulder            | 1                 |
| N021y     | Chondroc.-pyrophos.-other spec          | 1                 |
| N021x     | Chondroc.-pyrophos.-mult.sites          | 1                 |
| N0216     | Chondroc.-pyrophos.-knee                | 1                 |
| N0200     | Chondroc.-dical.ph.-site unsp.          | 1                 |
| N0201     | Chondroc.-dical.ph.-shoulder            | 1                 |
| N020y     | Chondroc.-dical.ph.-other spec          | 1                 |
| N020x     | Chondroc.-dical.ph.-mult.sites          | 1                 |
| N33zJ     | Chondritis                              | 1                 |
| 182C      | Chest wall pain                         | 1                 |
| N035      | Charcots arthropathy                    | 1                 |
| N132      | Cervicocranial syndrome                 | 1                 |
| N133      | Cervicobrachial syndrome                | 1                 |
| N148A     | Cervico-thoracic instability            | 1                 |
| N1483     | Cervico-thoracic ankylosis              | 1                 |
| N131      | Cervicalgia                             | 1                 |
| N138      | Cervicalgia                             | 1                 |
| N13y0     | Cervical syndrome NEC                   | 1                 |
| N119      | Cervical spondylosis with radiculopathy | 1                 |
| N11E      | Cervical spondylosis                    | 1                 |
| N110-1    | Cervical spondylosis                    | 1                 |
| N110      | Cervical spond.- no myelopathy          | 1                 |
| N111      | Cervical spond.+ myelopathy             | 1                 |
| N1489     | Cervical spine instability              | 1                 |
| N1482     | Cervical spine ankylosis                | 1                 |
| N130      | Cervical spinal stenosis                | 1                 |
| N13y3     | Cervical root syndrome                  | 1                 |

| Read code | Description                     | Number of studies |
|-----------|---------------------------------|-------------------|
| N12A1     | Cervical postlaminectomy syndr  | 1                 |
| N137      | Cervical post.long.lig.ossific  | 1                 |
| SJ306     | Cervical nerve root injury - C7 | 1                 |
| SJ305     | Cervical nerve root injury - C6 | 1                 |
| SJ304     | Cervical nerve root injury - C5 | 1                 |
| SJ303     | Cervical nerve root injury - C4 | 1                 |
| SJ30      | Cervical nerve root injury      | 1                 |
| N1113     | Cervical myelopathy             | 1                 |
| N13       | Cervical disorder NOS           | 1                 |
| N12z4     | Cervical discitis               | 1                 |
| N120      | Cervical disc displ.-no myelop  | 1                 |
| N1291     | Cervical disc disord.+myelop.   | 1                 |
| N125      | Cervical disc degeneration      | 1                 |
| S5701     | Cervical ant.longit.lig.sprain  | 1                 |
| N13z      | Cervical and neck disorders NOS | 1                 |
| N12zH     | Cerv disc disord + radiculoph   | 1                 |
| N21z0     | Capsulitis NOS                  | 1                 |
| N04y0     | Caplan's syndrome               | 1                 |
| N3202     | Calve's vertebral osteochondr.  | 1                 |
| N2454     | Calf pain                       | 1                 |
| N2226     | Calcium deposit in bursa        | 1                 |
| N2111     | Calcifying tendinitis shoulder  | 1                 |
| N12zB     | Calcification of thoracic disc  | 1                 |
| N22y1     | Calcification of tendon NOS     | 1                 |
| N12zF     | Calcification of lumbar disc    | 1                 |
| N23y1     | Calcification of ligament       | 1                 |
| N12z7     | Calcification of cervical disc  | 1                 |
| N23y9     | Calcific tendinitis             | 1                 |
| N2177     | Calcaneal spur                  | 1                 |
| N2315     | Calc/ossif musc ass with burns  | 1                 |
| N0011     | CREST syndrome                  | 1                 |
| 182Z.00   | CHEST PAIN NOS                  | 1                 |
| 182..00   | CHEST PAIN                      | 1                 |
| S1007     | C7 closed # - no cord lesion    | 1                 |
| S1006     | C6 closed # - no cord lesion    | 1                 |
| 1D12.00   | C/O: stiffness                  | 1                 |
| 1D12      | C/O: stiffness                  | 1                 |
| 16C7      | C/O - upper back ache           | 1                 |
| 1A53      | C/O - lumbar pain               | 1                 |
| 16C5      | C/O - low back pain             | 1                 |
| N2118     | Bursitis of shoulder            | 1                 |
| N223      | Bursitis NOS                    | 1                 |
| N2160-99  | Bursitis - knee                 | 1                 |
| N2160     | Bursitis - knee                 | 1                 |
| N221      | Bunion                          | 1                 |
| 16BZ      | Bruising symptom NOS            | 1                 |
| 16B       | Bruising symptom                | 1                 |
| 16B2      | Bruises easily                  | 1                 |
| SE4z      | Bruise NOS                      | 1                 |
| SE41      | Bruise - knee/lower leg         | 1                 |
| SE41-99   | Bruise - knee/lower leg         | 1                 |
| SE23      | Bruise - back                   | 1                 |
| N11y0     | Brucella spondylitis            | 1                 |



1  
2  
3  
4  
5  
6  
7  
8  
9  
10  
11  
12  
13  
14  
15  
16  
17  
18  
19  
20  
21  
22  
23  
24  
25  
26  
27  
28  
29  
30  
31  
32  
33  
34  
35  
36  
37  
38  
39  
40  
41  
42  
43  
44  
45  
46  
47  
48  
49  
50  
51  
52  
53  
54  
55  
56  
57  
58  
59  
60

| Read code | Description                       | Number of studies |
|-----------|-----------------------------------|-------------------|
| N3325     | Brown tumour-hyperparathyroid     | 1                 |
| N301G     | Brodie's abscess-thorac spine     | 1                 |
| N301H     | Brodie's abscess-lumbar spine     | 1                 |
| N301F     | Brodie's abscess-cervic spine     | 1                 |
| N302b     | Brodie's abscess                  | 1                 |
| N0503     | Bouchard's nodes with arthropathy | 1                 |
| N33z      | Bone/cartilage disorder NOS       | 1                 |
| N33z0     | Bone/cartilage dis.-unspecif.     | 1                 |
| N21z3     | Bone spur NOS                     | 1                 |
| N33A      | Bone pain                         | 1                 |
| N33zz     | Bone or cartilage disorders NOS   | 1                 |
| N31z      | Bone involvement in dis.EC NOS    | 1                 |
| N30z0     | Bone infectn.NOS-site unspecif    | 1                 |
| N30z1     | Bone infectn.NOS-shoulder         | 1                 |
| N30z9     | Bone infectn.NOS-multiple site    | 1                 |
| N30z      | Bone infection NOS                | 1                 |
| N30zz     | Bone infection NOS                | 1                 |
| N3320     | Bone cyst (localised),unspecif    | 1                 |
| N3y0      | Biomec lesn,not elsewh clas       | 1                 |
| N2112     | Bicipital tenosynovitis           | 1                 |
| N2134     | Biceps tendinitis                 | 1                 |
| N0120     | Behcet's syndrome arthropathy     | 1                 |
| N2222     | Beat knee                         | 1                 |
| N0870     | Bankart lesion                    | 1                 |
| N224A     | Baker's cyst                      | 1                 |
| N224A-1   | Baker's cyst                      | 1                 |
| 16        | Baker's cyst                      | 1                 |
| 16C3      | Backache with radiation           | 1                 |
| 16CZ      | Backache symptom NOS              | 1                 |
| 16C       | Backache symptom                  | 1                 |
| 16C2      | Backache                          | 1                 |
| N149      | Back stiffness                    | 1                 |
| S57       | Back sprain excl. lumbosacral     | 1                 |
| 16...     | Back sprain NOS                   | 1                 |
| S57z      | Back sprain NOS                   | 1                 |
| 16C4      | Back pain worse on sneezing       | 1                 |
| 16C6      | Back pain without radiat NOS      | 1                 |
| N145-2    | Back pain unspecified             | 1                 |
| N143      | Back pain - lower                 | 1                 |
| UNMAPPC6  | Back injury                       | 1                 |
| N14       | Back disorders - other            | 1                 |
| N14z      | Back disorder/symptom NOS         | 1                 |
| OX8479    | Back Strain/Sprain /ox            | 1                 |
| OX7289A   | Back Pain With Sciatica /ox       | 1                 |
| N2455     | Axillary pain                     | 1                 |
| N3347     | Avascular necrosis-other bone     | 1                 |
| N3345     | Avascular necrosis, capitellum    | 1                 |
| N334      | Avascular necrosis - bone         | 1                 |
| N334z     | Avascular bone necrosis NOS       | 1                 |
| N3340     | Avasc.bone necrosis site unsp.    | 1                 |
| N3383     | Atrophic non-union of fracture    | 1                 |
| S5703     | Atlanto-occipital joint sprain    | 1                 |
| N1487     | Atlanto-occipital instability     | 1                 |

| Read code | Description                                           | Number of studies |
|-----------|-------------------------------------------------------|-------------------|
| N1480     | Atlanto-occipital ankylosis                           | 1                 |
| S5702     | Atlanto-axial joint sprain                            | 1                 |
| N1488     | Atlanto-axial instability                             | 1                 |
| N1481     | Atlanto-axial ankylosis                               | 1                 |
| 14OD      | At risk of osteoporotic fracture                      | 1                 |
| 14O9      | At risk of osteoporosis                               | 1                 |
| N080z     | Articular cartilage disord.NOS                        | 1                 |
| N080      | Articular cart.disor.excl.knee                        | 1                 |
| N0800     | Artic.cart.dis.-site unspecif.                        | 1                 |
| N0801     | Artic.cart.dis.-shoulder                              | 1                 |
| N0807     | Artic.cart.dis.-other specif.                         | 1                 |
| N0808     | Artic.cart.dis.-multiple sites                        | 1                 |
| N080B     | Artic cart disord oth j-should                        | 1                 |
| N0539     | Arthrosis of first carpometacarpal joint, unspecified | 1                 |
| OX7131C   | Arthrosis Spine /ox                                   | 1                 |
| N0312     | Arthropathy-Whipple's disease                         | 1                 |
| N034      | Arthropathy+respiratory disord                        | 1                 |
| N015      | Arthropathy+other viral diseas                        | 1                 |
| N01y      | Arthropathy+other inf./parasit                        | 1                 |
| N03y      | Arthropathy+other condition EC                        | 1                 |
| N015z     | Arthropathy+oth.viral dis. NOS                        | 1                 |
| N014      | Arthropathy+oth.bacterial dis.                        | 1                 |
| N017z     | Arthropathy+helminthiasis NOS                         | 1                 |
| N032      | Arthropathy+haematological dis                        | 1                 |
| N031      | Arthropathy+gastrointestin.dis                        | 1                 |
| N030      | Arthropathy+endocr./metab.dis                         | 1                 |
| N033      | Arthropathy+dermatological dis                        | 1                 |
| N01       | Arthropathy with infections                           | 1                 |
| N0310     | Arthropathy in ulcerative colitis                     | 1                 |
| N069      | Arthropathy in neoplastic dis                         | 1                 |
| N0302     | Arthropathy in amyloidosis                            | 1                 |
| N0148     | Arthropathy in Whipple's disea                        | 1                 |
| N0311     | Arthropathy in Crohn's disease                        | 1                 |
| N0320     | Arthropathy due to haemophilia                        | 1                 |
| N06z1     | Arthropathy NOS-shoulder                              | 1                 |
| N06z4     | Arthropathy NOS-hand                                  | 1                 |
| N06z3     | Arthropathy NOS-forearm                               | 1                 |
| N06z7     | Arthropathy NOS, of the ankle and foot                | 1                 |
| N017      | Arthropathy + parasite infectn                        | 1                 |
| N016z     | Arthropathy + mycoses NOS                             | 1                 |
| N016      | Arthropathy + mycoses                                 | 1                 |
| N03z      | Arthropathy + disorders EC NOS                        | 1                 |
| N03       | Arthropathy + disorders EC                            | 1                 |
| N0y       | Arthropathies OS                                      | 1                 |
| N0313     | Arthropath follow intes bypass                        | 1                 |
| N036      | Arthrop-hypersensitivity reacn                        | 1                 |
| N012      | Arthrop+Behcet's syndrome                             | 1                 |
| N0121     | Arthrop+Behcet's synd-shoulder                        | 1                 |
| N012y     | Arthrop+Behcet's synd-oth spec                        | 1                 |
| N012x     | Arthrop+Behcet's synd-multiple                        | 1                 |
| N012z     | Arthrop+Behcet's synd NOS                             | 1                 |
| N2330     | Arthrogryposis                                        | 1                 |
| N0        | Arthritis/arthrosis                                   | 1                 |

1  
2  
3  
4  
5  
6  
7  
8  
9  
10  
11  
12  
13  
14  
15  
16  
17  
18  
19  
20  
21  
22  
23  
24  
25  
26  
27  
28  
29  
30  
31  
32  
33  
34  
35  
36  
37  
38  
39  
40  
41  
42  
43  
44  
45  
46  
47  
48  
49  
50  
51  
52  
53  
54  
55  
56  
57  
58  
59  
60

| Read code | Description                       | Number of studies |
|-----------|-----------------------------------|-------------------|
| N11       | Arthritis of spine                | 1                 |
| N010A     | Arthritis in Lyme disease         | 1                 |
| OX6960T   | Arthritis Psoriatic /ox           | 1                 |
| N06z-1    | Arthritis                         | 1                 |
| N094F     | Arthralgia of wrist               | 1                 |
| N094N     | Arthralgia of tibio-fibular joint | 1                 |
| N094A     | Arthralgia of shoulder            | 1                 |
| N094M     | Arthralgia of knee                | 1                 |
| N094D     | Arthralgia of elbow               | 1                 |
| N094P     | Arthralgia of ankle               | 1                 |
| N094H     | Arthralgia of PIP joint of finger | 1                 |
| N094G     | Arthralgia of MCP joint           | 1                 |
| N094T     | Arthralgia of 1st MTP joint       | 1                 |
| N0942     | Arthralgia - upper arm            | 1                 |
| N094B     | Arthralgia - sternoclav joint     | 1                 |
| N0941     | Arthralgia - shoulder             | 1                 |
| N0945     | Arthralgia - pelvic/thigh         | 1                 |
| N0944     | Arthralgia - hand                 | 1                 |
| N0943     | Arthralgia - forearm              | 1                 |
| N0947     | Arthralgia - ankle/foot           | 1                 |
| N094C     | Arthralgia - acromioclav joint    | 1                 |
| EGTON1    | Arthralgia                        | 1                 |
| N0150     | Arthr.+oth.viral dis-site unsp    | 1                 |
| N0151     | Arthr.+oth.viral dis-shoulder     | 1                 |
| N0140     | Arthr.+oth.bact.dis-site unsp.    | 1                 |
| N0141     | Arthr.+oth.bact.dis-shoulder      | 1                 |
| N014y     | Arthr.+oth.bact.dis-other spec    | 1                 |
| N014x     | Arthr.+oth.bact.dis-mult.sites    | 1                 |
| N014z     | Arthr.+oth.bact. disease NOS      | 1                 |
| N0160     | Arthr.+mycoses-site unspecif.     | 1                 |
| N0161     | Arthr.+mycoses-shoulder region    | 1                 |
| N016y     | Arthr.+mycoses-other specified    | 1                 |
| N016x     | Arthr.+mycoses-multiple sites     | 1                 |
| N0170     | Arthr.+helminth.-site unspec.     | 1                 |
| N0171     | Arthr.+helminth.-shoulder regn    | 1                 |
| N017y     | Arthr.+helminth.-other specif.    | 1                 |
| N017x     | Arthr.+helminth.-multiple site    | 1                 |
| N015y     | Arthr+oth.viral dis-other spec    | 1                 |
| N015x     | Arthr+oth.viral dis-mult.sites    | 1                 |
| N03x0     | Arthr assoc oth dis-shoulder      | 1                 |
| N03xB     | Arthr assoc oth dis-knee          | 1                 |
| N03x1     | Arthr ass oth dis-sternoclav j    | 1                 |
| N03x2     | Arthr ass oth dis-acromioclav j   | 1                 |
| N01yz     | Arth+other infect./parasit.NOS    | 1                 |
| N01y0     | Arth+oth.inf/para-site unspec.    | 1                 |
| N01y1     | Arth+oth.inf/para-shoulder reg    | 1                 |
| N01yy     | Arth+oth.inf/para-other specif    | 1                 |
| N01yx     | Arth+oth.inf/para-multipl.site    | 1                 |
| N245-2    | Arm pain                          | 1                 |
| N32z0     | Apophysitis NOS                   | 1                 |
| N006      | Antiphospholipid syndrome         | 1                 |
| 1M12      | Anterior knee pain                | 1                 |
| N094W     | Anterior knee pain                | 1                 |

| Read code | Description                      | Number of studies |
|-----------|----------------------------------|-------------------|
| S4101     | Anterior dislocation of shoulder | 1                 |
| N12z9     | Annular tear of thoracic disc    | 1                 |
| N12zD     | Annular tear of lumbar disc      | 1                 |
| N12z5     | Annular tear of cervical disc    | 1                 |
| N148      | Ankylosis/instab Cx,Th,Lu spin   | 1                 |
| N085B     | Ankylosis other joint-shoulder   | 1                 |
| N085P     | Ankylosis of the knee joint      | 1                 |
| N085A     | Ankylosis of shoulder joint      | 1                 |
| N0859     | Ankylosis of multiple joints     | 1                 |
| N085z     | Ankylosis of joint NOS           | 1                 |
| N085      | Ankylosis of joint               | 1                 |
| N117      | Ankylosing verteb.hyperostosis   | 1                 |
| N100*     | Ankylosing spondylitis           | 1                 |
| N100      | Ankylosing spondylitis           | 1                 |
| N245-1    | Ankle pain                       | 1                 |
| 1M13      | Ankle pain                       | 1                 |
| N05z7-1   | Ankle osteoarthritis NOS         | 1                 |
| N3384     | Angular mal-union of fracture    | 1                 |
| N3322     | Aneurysmal bone cyst             | 1                 |
| N2320     | Amyotrophia NOS                  | 1                 |
| N0620     | Allergic arthritis-site unsp.    | 1                 |
| N0621     | Allergic arthritis-shoulder      | 1                 |
| N0628     | Allergic arthritis-other spec.   | 1                 |
| N0629     | Allergic arthritis-multip.site   | 1                 |
| N062z     | Allergic arthritis-NOS           | 1                 |
| N062      | Allergic arthritis               | 1                 |
| N337z     | Algoneurodystrophy NOS           | 1                 |
| N3373     | Algodystrophy of knee            | 1                 |
| N04y2     | Adult-onset Still's disease      | 1                 |
| N32y0     | Adult osteochondrosis of spine   | 1                 |
| N005      | Adult Still's Disease            | 1                 |
| N370      | Adolescent postural kyphosis     | 1                 |
| N3737     | Adolescent idiopath scoliosis    | 1                 |
| N210      | Adhesive capsulitis - shoulde    | 1                 |
| N2156     | Adductor tendinitis              | 1                 |
| N084D     | Adduction contracture-shoulder   | 1                 |
| N0431     | Acute polyartic.juvenile R.A.    | 1                 |
| N300B     | Acute osteomyelitis-thor spine   | 1                 |
| N3000     | Acute osteomyelitis-site unsp.   | 1                 |
| N3001     | Acute osteomyelitis-shoulder     | 1                 |
| N300G     | Acute osteomyelitis-scapula      | 1                 |
| N300R     | Acute osteomyelitis-patella      | 1                 |
| N3008     | Acute osteomyelitis-other spec   | 1                 |
| N3009     | Acute osteomyelitis-mult.site    | 1                 |
| N300C     | Acute osteomyelitis-lumb spine   | 1                 |
| N300F     | Acute osteomyelitis-clavicle     | 1                 |
| N300A     | Acute osteomyelitis-cerv spine   | 1                 |
| N300z     | Acute osteomyelitis NOS          | 1                 |
| N300      | Acute osteomyelitis              | 1                 |
| S460      | Acute meniscal tear medial       | 1                 |
| S461      | Acute meniscal tear lateral      | 1                 |
| N090Y     | Acute joint effusion             | 1                 |
| N300Z     | Acute haematogen osteomyelitis   | 1                 |

1  
2  
3  
4  
5  
6  
7  
8  
9  
10  
11  
12  
13  
14  
15  
16  
17  
18  
19  
20  
21  
22  
23  
24  
25  
26  
27  
28  
29  
30  
31  
32  
33  
34  
35  
36  
37  
38  
39  
40  
41  
42  
43  
44  
45  
46  
47  
48  
49  
50  
51  
52  
53  
54  
55  
56  
57  
58  
59  
60

| Read code | Description                    | Number of studies |
|-----------|--------------------------------|-------------------|
| N145      | Acute back pain - unspecified  | 1                 |
| N145-1    | Acute back pain - unspecified  | 1                 |
| N141      | Acute back pain - thoracic     | 1                 |
| N141-1    | Acute back pain - thoracic     | 1                 |
| N142      | Acute back pain - lumbar       | 1                 |
| N142-3    | Acute back pain - lumbar       | 1                 |
| N12       | Acute back pain - disc         | 1                 |
| N143-1    | Acute back pain + sciatica     | 1                 |
| N06zA     | Acute arthritis                | 1                 |
| EGTONAC1  | Acromio-Clavicular Dislocation | 1                 |
| N384      | Acquired spondylolisthesis     | 1                 |
| N3720     | Acquired postural lordosis     | 1                 |
| N3710     | Acquired postural kyphosis     | 1                 |
| N372z     | Acquired lordosis NOS          | 1                 |
| N372      | Acquired lordosis              | 1                 |
| N371z     | Acquired kyphosis NOS          | 1                 |
| N371      | Acquired kyphosis              | 1                 |
| N366      | Acquired knee deformity NOS    | 1                 |
| N37z0     | Acquired hunchback             | 1                 |
| N3641     | Acquired genu varum            | 1                 |
| N364z     | Acquired genu valgum/varum NOS | 1                 |
| N364      | Acquired genu valgum/varum     | 1                 |
| N3640     | Acquired genu valgum           | 1                 |
| N385      | Acquired deformity spine NOS   | 1                 |
| N382      | Acquired deformity of neck     | 1                 |
| N38z      | Acquired deformity NOS         | 1                 |
| N38y0     | Acquired clavicle deformity    | 1                 |
| 1DCC.00   | Aching muscles                 | 1                 |
| 1DCC      | Aching muscles                 | 1                 |
| N220H     | Achilles tenosynovitis         | 1                 |
| N2174     | Achilles tendinitis            | 1                 |
| N094-1    | Ache in joint                  | 1                 |
| S4604     | Ac mnscl tr,med,periph,dtchmt  | 1                 |
| S4614     | Ac mnscl tr,lat,periph,dtchmt  | 1                 |
| S4605     | Ac mnscl tear,med,horiz clvge  | 1                 |
| S4615     | Ac mnscl tear,lat,horiz clvge  | 1                 |
| S4602     | Ac menscl tear,med,bckt hndle  | 1                 |
| S4612     | Ac menscl tear,lat,bckt hndle  | 1                 |
| S4603     | Ac meniscal tear,med,radial    | 1                 |
| S4601     | Ac meniscal tear,med,post horn | 1                 |
| S4600     | Ac meniscal tear,med,ant horn  | 1                 |
| S4613     | Ac meniscal tear,lat,radial    | 1                 |
| S4611     | Ac meniscal tear,lat,post horn | 1                 |
| S4610     | Ac meniscal tear,lat,ant horn  | 1                 |
| N22y2     | Abscess of tendon              | 1                 |
| N22yE     | Abscess of bursa-shoulder      | 1                 |
| N22yJ     | Abscess of bursa-knee          | 1                 |
| N22y3     | Abscess of bursa               | 1                 |
| SD        | Abrasions                      | 1                 |
| N084C     | Abduction contracture-shoulder | 1                 |
| 1969.00   | Abdominal pain                 | 1                 |
| EGTON251  | ? Frozen Right Shoulder        | 1                 |
| N11C1     | 2 lev lumbsac spond+radiculop  | 1                 |

| Read code | Description                    | Number of studies |
|-----------|--------------------------------|-------------------|
| N11C0     | 1 lev lumbsac spond+radiculop  | 1                 |
| HNG0160   | (hn) Sports Injury             | 1                 |
| HNG0157   | (hn) Spinal Injury             | 1                 |
| HNG0162   | (hn) Soft tissue injuries      | 1                 |
| HNG0163   | (hn) Rhematic problems         | 1                 |
| S11       | #Vertebra + cord lesion        | 1                 |
| S10z      | #Spine - no cord lesion - NOS  | 1                 |
| S10       | #Spine - no cord lesion        | 1                 |
| S11z      | #Spine + cord lesion NOS       | 1                 |
| S21z      | #Scapula NOS                   | 1                 |
| S21       | #Scapula                       | 1                 |
| S32z      | #Patella NOS                   | 1                 |
| S104      | #Lumbar spine - no cord lesion | 1                 |
| S32       | #Knee-cap                      | 1                 |
| S20z      | #Clavicle NOS                  | 1                 |
| S20       | #Clavicle                      | 1                 |
| S3zz      | #Bones NOS                     | 1                 |
| S4F       | #-dslc/subluxation knee        | 1                 |
| S4A       | #-dslc or subluxation shoulder | 1                 |

1  
2  
3 **Appendix 17. List of Read codes used in the studies of male sexual dysfunction.**  
4

5

| 6 Read code | Description                                      | Number of studies |
|-------------|--------------------------------------------------|-------------------|
| 7 E227311   | Erectile dysfunction                             | 3                 |
| 8 K27y100   | Impotence of organic origin                      | 2                 |
| 9 E227300   | Impotence                                        | 2                 |
| 10 Eu52213  | [X]Psychogenic impotence                         | 1                 |
| 11 Eu52212  | [X]Male erectile disorder                        | 1                 |
| 12 E227000  | Unspecified psychosexual dysfunction             | 1                 |
| 13 7C25E00  | Treatment of erectile dysfunction NEC            | 1                 |
| 14 7A6G000  | Revascularisation for impotence                  | 1                 |
| 15 8IE8.00  | Referral to erectile dysfunction clinic declined | 1                 |
| 16 8HTj.00  | Referral to erectile dysfunction clinic          | 1                 |
| 17 E227z00  | Psychosexual dysfunction NOS                     | 1                 |
| 18 E227.00  | Psychosexual dysfunction                         | 1                 |
| 19 E227700  | Psychogenic dyspareunia                          | 1                 |
| 20 Z9E9.00  | Provision of device for impotence                | 1                 |
| 21 E227600  | Premature ejaculation                            | 1                 |
| 22 7C25F00  | Operations on penis for erectile dysfunction NEC | 1                 |
| 23 7A6G500  | Ligation of penile veins for impotence           | 1                 |
| 24 E227.11  | Lack of libido                                   | 1                 |
| 25 E227100  | Inhibited sexual desire                          | 1                 |
| 26 E227500  | Inhibited male orgasm                            | 1                 |
| 27 E227z11  | Fear of ejaculation                              | 1                 |
| 28 K27y700  | Erectile dysfunction due to diabetes mellitus    | 1                 |
| 29 66Au.00  | Diabetic erectile dysfunction review             | 1                 |
| 30 66Av.00  | Diabetic assessment of erectile dysfunction      | 1                 |
| 31 1D1B.00  | C/O erectile dysfunction                         | 1                 |
| 32 ZG43600  | Advice on technique for impotence                | 1                 |
| 33 67IA.00  | Advice about impotence                           | 1                 |

34  
35  
36  
37  
38  
39  
40  
41  
42  
43  
44  
45  
46  
47  
48  
49  
50  
51  
52  
53  
54  
55  
56  
57  
58  
59  
60

1  
2  
3 **Appendix 18. List of Read codes used in the studies of sleep disorder.**  
4

| Read code | Description                                       | Number of studies |
|-----------|---------------------------------------------------|-------------------|
| 1B1B.00   | Cannot sleep - insomnia                           | 1                 |
| 1B1B.11   | C/O - insomnia                                    | 1                 |
| 1B1B100   | Middle insomnia                                   | 1                 |
| 1B1B200   | Late insomnia                                     | 1                 |
| 1B1Q.00   | Poor sleep pattern                                | 1                 |
| E274.00   | Non-organic sleep disorders                       | 1                 |
| E274.11   | Hypersomnia of non-organic origin                 | 1                 |
| E274.12   | Insomnia due to nonorganic sleep disorder         | 1                 |
| E274000   | Unspecified non-organic sleep disorder            | 1                 |
| E274100   | Transient insomnia                                | 1                 |
| E274111   | Insomnia NOS                                      | 1                 |
| E274200   | Persistent insomnia                               | 1                 |
| E274300   | Transient hypersomnia                             | 1                 |
| E274311   | Hypersomnia NOS                                   | 1                 |
| E274400   | Persistent hypersomnia                            | 1                 |
| E274500   | Jet lag syndrome                                  | 1                 |
| E274600   | Shifting sleep-work schedule                      | 1                 |
| E274700   | Somnambulism - sleep walking                      | 1                 |
| E274800   | Night terrors                                     | 1                 |
| E274900   | Nightmares                                        | 1                 |
| E274A00   | Sleep drunkenness                                 | 1                 |
| E274B00   | Repeated rapid eye movement sleep interruptions   | 1                 |
| E274C00   | Other sleep stage or arousal dysfunction          | 1                 |
| E274D00   | Repetitive intrusions of sleep                    | 1                 |
| E274D11   | Restless sleep                                    | 1                 |
| E274E00   | 'Short-sleeper'                                   | 1                 |
| E274F00   | Inversion of sleep rhythm                         | 1                 |
| E274y00   | Other non-organic sleep disorder                  | 1                 |
| E274y11   | Dreams                                            | 1                 |
| E274z00   | Non-organic sleep disorder NOS                    | 1                 |
| Eu51.00   | [X]Nonorganic sleep disorders                     | 1                 |
| Eu51000   | [X]Nonorganic insomnia                            | 1                 |
| Eu51100   | [X]Nonorganic hypersomnia                         | 1                 |
| Eu51200   | [X]Nonorganic disorder of the sleep-wake schedule | 1                 |
| Fy00.00   | Disorders of initiating and maintaining sleep     | 1                 |
| Fy01.00   | Disorders of excessive somnolence                 | 1                 |
| Fy02.00   | Disorders of the sleep-wake schedule              | 1                 |
| R005.00   | [D]Sleep disturbances                             | 1                 |
| R005.11   | [D]Insomnia - symptom                             | 1                 |
| R005.12   | [D]Sleep rhythm problems                          | 1                 |
| R005000   | [D]Sleep disturbance, unspecified                 | 1                 |
| R005100   | [D]Insomnia with sleep apnoea                     | 1                 |
| R005200   | [D]Insomnia NOS                                   | 1                 |
| R005300   | [D]Hypersomnia with sleep apnoea                  | 1                 |
| R005311   | [D]Sleep apnoea syndrome                          | 1                 |
| R005312   | [D]Syndrome sleep apnoea                          | 1                 |
| R005400   | [D]Hypersomnia NOS                                | 1                 |
| R005500   | [D]Sleep rhythm inversion                         | 1                 |
| R005600   | [D]Sleep rhythm irregular                         | 1                 |
| R005700   | [D]Sleep-wake rhythm non-24-hour cycle            | 1                 |
| R005800   | [D]Sleep dysfunction with sleep stage disturbance | 1                 |



1  
2  
3  
4  
5  
6  
7  
8  
9  
10  
11  
12  
13  
14  
15  
16  
17  
18  
19  
20  
21  
22  
23  
24  
25  
26  
27  
28  
29  
30  
31  
32  
33  
34  
35  
36  
37  
38  
39  
40  
41  
42  
43  
44  
45  
46  
47  
48  
49  
50  
51  
52  
53  
54  
55  
56  
57  
58  
59  
60

| Read code | Description                                   | Number of studies |
|-----------|-----------------------------------------------|-------------------|
| R005900   | [D]Sleep dysfunction with arousal disturbance | 1                 |
| R005z00   | [D]Sleep dysfunction NOS                      | 1                 |

For peer review only

**Appendix 19. List of Read codes used in the studies of fatal and non-fatal self-harm.**

| Read code | Description                                                  | Number of studies |
|-----------|--------------------------------------------------------------|-------------------|
| TK1y.00   | Suicide and selfinflicted poisoning by other utility gas     | 8                 |
| TK21.00   | Suicide and selfinflicted poisoning by other carbon monoxide | 8                 |
| TK01000   | Suicide and self inflicted injury by Amylobarbitone          | 8                 |
| TK03.00   | Suicide + selfinflicted poisoning tranquilliser/psychotropic | 8                 |
| TK0z.00   | Suicide + selfinflicted poisoning by solid/liquid subst NOS  | 8                 |
| TK04.00   | Suicide + selfinflicted poisoning by other drugs/medicines   | 8                 |
| TK02.00   | Suicide + selfinflicted poisoning by oth sedatives/hypnotics | 8                 |
| TK20.00   | Suicide + selfinflicted poisoning by motor veh exhaust gas   | 8                 |
| TK05.00   | Suicide + selfinflicted poisoning by drug or medicine NOS    | 8                 |
| TK07.00   | Suicide + selfinflicted poisoning by corrosive/caustic subst | 8                 |
| TK01.00   | Suicide + selfinflicted poisoning by barbiturates            | 8                 |
| TK00.00   | Suicide + selfinflicted poisoning by analgesic/antipyretic   | 8                 |
| TK06.00   | Suicide + selfinflicted poisoning by agricultural chemical   | 8                 |
| U200.00   | [X]Intent self poison/exposure to nonopioid analgesic        | 7                 |
| U20..11   | [X]Deliberate drug overdose / other poisoning                | 7                 |
| TK70.00   | Suicide+selfinflicted injury-jump from residential premises  | 7                 |
| TK71.00   | Suicide+selfinflicted injury-jump from oth manmade structure | 7                 |
| TK72.00   | Suicide+selfinflicted injury-jump from natural sites         | 7                 |
| TK7z.00   | Suicide+selfinflicted injury-jump from high place NOS        | 7                 |
| TK61.00   | Suicide and selfinflicted injury by stabbing                 | 7                 |
| TK51.00   | Suicide and selfinflicted injury by shotgun                  | 7                 |
| TKx2.00   | Suicide and selfinflicted injury by scald                    | 7                 |
| TKxy.00   | Suicide and selfinflicted injury by other specified means    | 7                 |
| TK54.00   | Suicide and selfinflicted injury by other firearm            | 7                 |
| TK52.00   | Suicide and selfinflicted injury by hunting rifle            | 7                 |
| TK30.00   | Suicide and selfinflicted injury by hanging                  | 7                 |
| TK6z.00   | Suicide and selfinflicted injury by cutting and stabbing NOS | 7                 |
| TK60.00   | Suicide and selfinflicted injury by cutting                  | 7                 |
| TKx5.00   | Suicide and selfinflicted injury by crashing motor vehicle   | 7                 |
| TKx1.00   | Suicide and selfinflicted injury by burns or fire            | 7                 |
| TK...00   | Suicide and selfinflicted injury                             | 7                 |
| TK01400   | Suicide and self inflicted injury by Phenobarbitone          | 7                 |
| TK01100   | Suicide and self inflicted injury by Barbitone               | 7                 |
| TK...14   | Suicide and self harm                                        | 7                 |
| TK0..00   | Suicide + selfinflicted poisoning by solid/liquid substances | 7                 |
| TK2..00   | Suicide + selfinflicted poisoning by other gases and vapours | 7                 |
| TK11.00   | Suicide + selfinflicted poisoning by liquified petrol gas    | 7                 |
| TK2z.00   | Suicide + selfinflicted poisoning by gases and vapours NOS   | 7                 |
| TK10.00   | Suicide + selfinflicted poisoning by gas via pipeline        | 7                 |
| TK1z.00   | Suicide + selfinflicted poisoning by domestic gases NOS      | 7                 |
| TKx0000   | Suicide + selfinflicted injury-jumping before moving object  | 7                 |
| TK31.00   | Suicide + selfinflicted injury by suffocation by plastic bag | 7                 |
| TK3y.00   | Suicide + selfinflicted inj oth mean hang/strangle/suffocate | 7                 |
| TK3z.00   | Suicide + selfinflicted inj by hang/strangle/suffocate NOS   | 7                 |
| TK...13   | Poisoning - self-inflicted                                   | 7                 |
| TK...17   | Para-suicide                                                 | 7                 |
| TK...11   | Cause of overdose - deliberate                               | 7                 |
| TK...15   | Attempted suicide                                            | 7                 |
| U2...13   | [X]Suicide                                                   | 6                 |
| U20C.11   | [X]Self poisoning with weedkiller                            | 6                 |
| U20C.12   | [X]Self poisoning with paraquat                              | 6                 |

1  
2  
3  
4  
5  
6  
7  
8  
9  
10  
11  
12  
13  
14  
15  
16  
17  
18  
19  
20  
21  
22  
23  
24  
25  
26  
27  
28  
29  
30  
31  
32  
33  
34  
35  
36  
37  
38  
39  
40  
41  
42  
43  
44  
45  
46  
47  
48  
49  
50  
51  
52  
53  
54  
55  
56  
57  
58  
59  
60

| Read code | Description                                                  | Number of studies |
|-----------|--------------------------------------------------------------|-------------------|
| U20A.11   | [X]Self poisoning from glue solvent                          | 6                 |
| U20B.11   | [X]Self carbon monoxide poisoning                            | 6                 |
| U2...15   | [X]Para-suicide                                              | 6                 |
| U20..00   | [X]Intentional self poisoning/exposure to noxious substances | 6                 |
| U20A.00   | [X]Intentional self poison organ solvent,halogen hydrocarb   | 6                 |
| U20y.00   | [X]Intent self poison/exposure to unspecif chemical          | 6                 |
| U202.00   | [X]Intent self poison/exposure to sedative hypnotic          | 6                 |
| U204.00   | [X]Intent self poison/exposure to psychotropic drug          | 6                 |
| U20C.00   | [X]Intent self poison/exposure to pesticide                  | 6                 |
| U20B.00   | [X]Intent self poison/exposure to other gas/vapour           | 6                 |
| U207.00   | [X]Intent self poison/exposure to oth autonomic drug         | 6                 |
| U206.00   | [X]Intent self poison/exposure to hallucinogen               | 6                 |
| U201.00   | [X]Intent self poison/exposure to antiepileptic              | 6                 |
| U20yz00   | [X]Intent self poison unspecif chemical unspecif place       | 6                 |
| U202z00   | [X]Intent self poison sedative hypnotic unspecif place       | 6                 |
| U204z00   | [X]Intent self poison psychotropic drug unspecif place       | 6                 |
| U204100   | [X]Intent self poison psychotropic drug at res institut      | 6                 |
| U20Bz00   | [X]Intent self poison other gas/vapour unspecif place        | 6                 |
| U208z00   | [X]Intent self poison oth/unsp drug/medic unspecif place     | 6                 |
| U207z00   | [X]Intent self poison oth autonomic drug unspecif place      | 6                 |
| U200z00   | [X]Intent self poison nonopioid analgesic unspecif place     | 6                 |
| U200100   | [X]Intent self poison nonopioid analgesic at res institut    | 6                 |
| U205z00   | [X]Intent self poison narcotic drug unspecif place           | 6                 |
| U201z00   | [X]Intent self poison antiepileptic unspecif place           | 6                 |
| U206400   | [X]Intent self pois hallucinogen in street/highway           | 6                 |
| U20y000   | [X]Int self poison/exposure to unspecif chemical at home     | 6                 |
| U202000   | [X]Int self poison/exposure to sedative hypnotic at home     | 6                 |
| U204000   | [X]Int self poison/exposure to psychotropic drug at home     | 6                 |
| U20C000   | [X]Int self poison/exposure to pesticide at home             | 6                 |
| U208.00   | [X]Int self poison/exposure to other/unspec drug/medicament  | 6                 |
| U20B000   | [X]Int self poison/exposure to other gas/vapour at home      | 6                 |
| U207000   | [X]Int self poison/exposure to oth autonomic drug at home    | 6                 |
| U200000   | [X]Int self poison/exposure to nonopioid analgesic at home   | 6                 |
| U205000   | [X]Int self poison/exposure to narcotic drug at home         | 6                 |
| U201000   | [X]Int self poison/exposure to antiepileptic at home         | 6                 |
| U20y200   | [X]Int self poison unspecif chemical school/pub admin area   | 6                 |
| U202y00   | [X]Int self poison sedative hypnotic other spec place        | 6                 |
| U204y00   | [X]Int self poison psychotropic drug other spec place        | 6                 |
| U20Cy00   | [X]Int self poison pesticide other spec place                | 6                 |
| U20B200   | [X]Int self poison other gas/vapour school/pub admin area    | 6                 |
| U20By00   | [X]Int self poison other gas/vapour other spec place         | 6                 |
| U208y00   | [X]Int self poison oth/unsp drug/medic other spec place      | 6                 |
| U20A400   | [X]Int self poison org solvent,halogen hydrocarb,in highway  | 6                 |
| U200y00   | [X]Int self poison nonopioid analgesic other spec place      | 6                 |
| U205y00   | [X]Int self poison narcotic drug other spec place            | 6                 |
| U2...14   | [X]Attempted suicide                                         | 6                 |
| TKx7.00   | Suicide and selfinflicted injury caustic subst, excl poison  | 6                 |
| TKxz.00   | Suicide and selfinflicted injury by other means NOS          | 6                 |
| TKx..00   | Suicide and selfinflicted injury by other means              | 6                 |
| TK7..00   | Suicide and selfinflicted injury by jumping from high place  | 6                 |
| TKx3.00   | Suicide and selfinflicted injury by extremes of cold         | 6                 |
| TKx4.00   | Suicide and selfinflicted injury by electrocution            | 6                 |
| TK4..00   | Suicide and selfinflicted injury by drowning                 | 6                 |

| Read code | Description                                                   | Number of studies |
|-----------|---------------------------------------------------------------|-------------------|
| TK6..00   | Suicide and selfinflicted injury by cutting and stabbing      | 6                 |
| TKz..00   | Suicide and selfinflicted injury NOS                          | 6                 |
| TK1..00   | Suicide + selfinflicted poisoning by gases in domestic use    | 6                 |
| TKx0.00   | Suicide + selfinflicted injury-jump/lie before moving object  | 6                 |
| TK3..00   | Suicide + selfinflicted injury by hang/strangulate/suffocate  | 6                 |
| U2y0.00   | [X]Intentionl self harm by oth specif means occurrn at home   | 5                 |
| U2z0.00   | [X]Intentional self harm by unspecif means occurrn at home    | 5                 |
| U290.00   | [X]Intentional self harm by sharp object occurrence at home   | 5                 |
| U29z.00   | [X]Intentional self harm by sharp object occ unspecif place   | 5                 |
| U2A0.00   | [X]Intentional self harm by blunt object occurrence at home   | 5                 |
| U270.00   | [X]Intention self harm by smoke fire/flames occurrn at home   | 5                 |
| U294.00   | [X]Intention self harm by sharp object occ street/highway     | 5                 |
| U29y.00   | [X]Intention self harm by sharp object occ oth specif place   | 5                 |
| U205.00   | [X]Intent self poison/exposure to narcotic drug               | 5                 |
| U209.00   | [X]Intent self poison/exposure to alcohol                     | 5                 |
| U209z00   | [X]Intent self poison alcohol unspecif place                  | 5                 |
| U202400   | [X]Intent self pois sedative hypnotic in street/highway       | 5                 |
| U208400   | [X]Intent self pois oth/unsp drug/medic in street/highway     | 5                 |
| U20A000   | [X]Intent self pois organ solvent,halogen hydrocarb, home     | 5                 |
| U200500   | [X]Intent self pois nonopioid analgesic trade/service area    | 5                 |
| U250.00   | [X]Intent self harm oth/unspecif firearm disch occ at home    | 5                 |
| U2D6.00   | [X]Intent self harm crash motor vehic occ indust/constr area  | 5                 |
| U2zy.00   | [X]Intent self harm by unspecif means occ oth specif place    | 5                 |
| U2zz.00   | [X]Intent self harm by unspecif means occ at unspecif place   | 5                 |
| U2z2.00   | [X]Intent self harm by unspec mean occ sch/ins/pub adm area   | 5                 |
| U27z.00   | [X]Intent self harm by smoke fire/flames occ unspecif place   | 5                 |
| U274.00   | [X]Intent self harm by smoke fire/flame occ street/highway    | 5                 |
| U291.00   | [X]Intent self harm by sharp object occ resident instit'n     | 5                 |
| U2yz.00   | [X]Intent self harm by oth specif means occ unspecif place    | 5                 |
| U2y1.00   | [X]Intent self harm by oth specif means occ resid instit'n    | 5                 |
| U2B0.00   | [X]Intent self harm by jumping from high place occ at home    | 5                 |
| U2B4.00   | [X]Intent self harm by jump from high place occ street/h'way  | 5                 |
| U211.00   | [X]Intent self harm by hangng strangult/suffoct resid instit  | 5                 |
| U21z.00   | [X]Intent self harm by hangng strangul/suffoct unspecif plce  | 5                 |
| U21y.00   | [X]Intent self harm by hangng strangul/suffoct oth spec plce  | 5                 |
| U210.00   | [X]Intent self harm by hanging strangulat/suffocat occ home   | 5                 |
| U221.00   | [X]Intent self harm by drowning/submersn occ resid instit'n   | 5                 |
| U22z.00   | [X]Intent self harm by drown/submersn occ unspecified place   | 5                 |
| U22y.00   | [X]Intent self harm by drown/submersn occ oth specif place    | 5                 |
| U2D0.00   | [X]Intent self harm by crash of motor vehicl occurrn at home  | 5                 |
| U2D4.00   | [X]Intent self harm by crash motor vehicl occ street/highway  | 5                 |
| U2A3.00   | [X]Intent self harm by blunt object occ sports/athlet area    | 5                 |
| U2A1.00   | [X]Intent self harm by blunt object occ resident instit'n     | 5                 |
| U242.00   | [X]Int slf hrm rifl s'gun/lrg framm dis sch/ins/pub adm area  | 5                 |
| U208000   | [X]Int self poison/exposure to oth/unsp drug/medicam home     | 5                 |
| U209y00   | [X]Int self poison alcohol other spec place                   | 5                 |
| U20Az00   | [X]Int self pois org solv,halogen hydrocarb, unspec place     | 5                 |
| U241.00   | [X]Int self harm rifl s'gun/lrg framm disch occ resid instit  | 5                 |
| U2C4.00   | [X]Int self harm jump/lying befrr mov obje occ street/highway | 5                 |
| U2C1.00   | [X]Int self harm jump/lying befrr mov obje occ resid instit'n | 5                 |
| U2Cy.00   | [X]Int self harm jump/lying bef mov obje occ oth specif plce  | 5                 |
| U2Bz.00   | [X]Int self harm by jump from high place occ unspecif place   | 5                 |
| U2By.00   | [X]Int self harm by jump from high place occ oth specif plce  | 5                 |

1  
2  
3  
4  
5  
6  
7  
8  
9  
10  
11  
12  
13  
14  
15  
16  
17  
18  
19  
20  
21  
22  
23  
24  
25  
26  
27  
28  
29  
30  
31  
32  
33  
34  
35  
36  
37  
38  
39  
40  
41  
42  
43  
44  
45  
46  
47  
48  
49  
50  
51  
52  
53  
54  
55  
56  
57  
58  
59  
60

| Read code | Description                                                  | Number of studies |
|-----------|--------------------------------------------------------------|-------------------|
| U2B6.00   | [X]Int self harm by jump from high place indust/constr area  | 5                 |
| TK5z.00   | Suicide and selfinflicted injury by firearms/explosives NOS  | 5                 |
| TK5..00   | Suicide and selfinflicted injury by firearms and explosives  | 5                 |
| TKx6.00   | Suicide and selfinflicted injury by crashing of aircraft     | 5                 |
| TK60111   | Slashed wrists self inflicted                                | 5                 |
| TK60100   | Self inflicted lacerations to wrist                          | 5                 |
| U202.13   | [X]Overdose - temazepam                                      | 4                 |
| U202.11   | [X]Overdose - sleeping tabs                                  | 4                 |
| U202.15   | [X]Overdose - nitrazepam                                     | 4                 |
| U202.12   | [X]Overdose - diazepam                                       | 4                 |
| U202.16   | [X]Overdose - benzodiazepine                                 | 4                 |
| U202.17   | [X]Overdose - barbiturate                                    | 4                 |
| U204.11   | [X]Overdose - antidepressant                                 | 4                 |
| U202.18   | [X]Overdose - amobarbital                                    | 4                 |
| U204.12   | [X]Overdose - amitriptyline                                  | 4                 |
| U204.13   | [X]Overdose - SSRI                                           | 4                 |
| U2z..00   | [X]Intentional self harm by unspecified means                | 4                 |
| U27..00   | [X]Intentional self harm by smoke, fire and flames           | 4                 |
| U29..00   | [X]Intentional self harm by sharp object                     | 4                 |
| U2y..00   | [X]Intentional self harm by other specified means            | 4                 |
| U2B..00   | [X]Intentional self harm by jumping from a high place        | 4                 |
| U26..00   | [X]Intentional self harm by explosive material               | 4                 |
| U22..00   | [X]Intentional self harm by drowning and submersion          | 4                 |
| U2D..00   | [X]Intentional self harm by crashing of motor vehicle        | 4                 |
| U2A..00   | [X]Intentional self harm by blunt object                     | 4                 |
| U200400   | [X]Intent self pois nonopioid analgesic in street/highway    | 4                 |
| U28z.00   | [X]Intent self harm by steam hot vapour/obj occ unspec place | 4                 |
| U280.00   | [X]Intent self harm by steam hot vapour/hot obj occ at home  | 4                 |
| U24..00   | [X]Intent self harm by rifle shotgun/larger firearm disch    | 4                 |
| U25..00   | [X]Intent self harm by other/unspecified firearm discharge   | 4                 |
| U2C..00   | [X]Intent self harm by jumping / lying before moving object  | 4                 |
| U21..00   | [X]Intent self harm by hanging strangulation / suffocation   | 4                 |
| U212.00   | [X]Inten slf harm hang strang/suffc sch oth ins/pub adm area | 4                 |
| U209000   | [X]Int self poison/exposure to alcohol at home               | 4                 |
| U41..00   | [X]Hanging strangulation + suffocation undetermined intent   | 4                 |
| U4Bz.00   | [X]Fall jump/push frm high plce undt intnt occ unspecif plce | 4                 |
| U720.00   | [X]Sequelae of intentional self-harm                         | 3                 |
| U2...11   | [X]Self inflicted injury                                     | 3                 |
| U44..00   | [X]Rifle shotgun+larger firearm discharge undetermin intent  | 3                 |
| U40y.00   | [X]Poisoning/exposure, ? intent, to unspecif chemical        | 3                 |
| U402.00   | [X]Poisoning/exposure, ? intent, to sedative hypnotic        | 3                 |
| U404.00   | [X]Poisoning/exposure, ? intent, to psychotropic drug        | 3                 |
| U40C.00   | [X]Poisoning/exposure, ? intent, to pesticide                | 3                 |
| U40B.00   | [X]Poisoning/exposure, ? intent, to other gas/vapour         | 3                 |
| U400.00   | [X]Poisoning/exposure, ? intent, to nonopioid analgesic      | 3                 |
| U405.00   | [X]Poisoning/exposure, ? intent, to narcotic drug            | 3                 |
| U409.00   | [X]Poisoning/exposure, ? intent, to alcohol                  | 3                 |
| U40..00   | [X]Poisoning/expos to noxious substance,undetermined intent  | 3                 |
| U408.00   | [X]Poison/exposure, ?intent, to other/unspec drug/medicament | 3                 |
| U408000   | [X]Poison/exposure ?intent, to oth/unsp drug/medicam home    | 3                 |
| U409000   | [X]Poison/exposure ?intent, to alcohol at home               | 3                 |
| U40y600   | [X]Poison/expos ?intent unspec chemic indust/construct area  | 3                 |
| U200.11   | [X]Overdose - paracetamol                                    | 3                 |

| Read code | Description                                                  | Number of studies |
|-----------|--------------------------------------------------------------|-------------------|
| U200.12   | [X]Overdose - ibuprofen                                      | 3                 |
| U200.13   | [X]Overdose - aspirin                                        | 3                 |
| U45..00   | [X]Other+unspecified firearm discharge undetermined intent   | 3                 |
| U2...00   | [X]Intentional self-harm                                     | 3                 |
| U28..00   | [X]Intentional self harm by steam hot vapours / hot objects  | 3                 |
| U216.00   | [X]Intent self harm by hang strangl/suffc indust/constr area | 3                 |
| U220.00   | [X]Intent self harm by drowning/submersion occurrn at home   | 3                 |
| U206000   | [X]Int self poison/exposure to hallucinogen at home          | 3                 |
| U2...12   | [X]Injury - self-inflicted                                   | 3                 |
| U410.00   | [X]Hanging strangulat+suffocat undet intent occurrn at home  | 3                 |
| U4B..00   | [X]Falling jumping/pushed from high place undeterm intent    | 3                 |
| U30..11   | [X]Deliberate drug poisoning                                 | 3                 |
| ZX1R.00   | Throwing self in front of vehicle                            | 3                 |
| ZX1Q.00   | Throwing self in front of train                              | 3                 |
| TK53.00   | Suicide and selfinflicted injury by military firearms        | 3                 |
| TK01z00   | Suicide and self inflicted injury by barbiturates            | 3                 |
| TK2y.00   | Suicide + selfinflicted poisoning by other gases and vapours | 3                 |
| TKx0z00   | Suicide + selfinflicted inj-jump/lie before moving obj NOS   | 3                 |
| ZX1N.00   | Stabbing self                                                | 3                 |
| ZX1M.00   | Shooting self                                                | 3                 |
| ZX1K.12   | Setting self alight                                          | 3                 |
| ZX1K.11   | Setting fire to self                                         | 3                 |
| ZX1H200   | Self-suffocation                                             | 3                 |
| ZX1H100   | Self-strangulation                                           | 3                 |
| ZX1K.00   | Self-incineration                                            | 3                 |
| ZX1J.00   | Self-electrocution                                           | 3                 |
| ZX1H.00   | Self-asphyxiation                                            | 3                 |
| SL...15   | Overdose of drug                                             | 3                 |
| SL...14   | Overdose of biological substance                             | 3                 |
| TKy..00   | Late effects of selfinflicted injury                         | 3                 |
| ZX1Q.11   | Jumping under train                                          | 3                 |
| ZX1B.00   | Jumping from height                                          | 3                 |
| ZX1B300   | Jumping from cliff                                           | 3                 |
| ZX1B100   | Jumping from building                                        | 3                 |
| ZX1B200   | Jumping from bridge                                          | 3                 |
| TK...12   | Injury - self-inflicted                                      | 3                 |
| ZX18.00   | Hanging self                                                 | 3                 |
| SLHz.00   | Drug and medicament poisoning NOS                            | 3                 |
| ZX15.00   | Drowning self                                                | 3                 |
| U72..00   | [X]Sequel intentn self-harm assault+event of undeterm intent | 2                 |
| ZX1LD00   | [X]Self mutilation                                           | 2                 |
| U40y000   | [X]Poison/exposure ?intent, to unspecif chemical at home     | 2                 |
| U40C000   | [X]Poison/exposure ?intent, to pesticide at home             | 2                 |
| U40A.00   | [X]Pois/exposure,?intent,to organ solvent,halogen hydrocarb  | 2                 |
| U40y400   | [X]Pois/expos ?intent unspecif chemical in street/highway    | 2                 |
| U40yz00   | [X]Pois/expos ?intent to unspecif chemical unspecif place    | 2                 |
| U402z00   | [X]Pois/expos ?intent to sedative hypnotic unspecif place    | 2                 |
| U408z00   | [X]Pois/expos ?intent to oth/unsp drug/medic unspecif place  | 2                 |
| U409z00   | [X]Pois/expos ?intent to alcohol unspecif place              | 2                 |
| U40B400   | [X]Pois/expos ?intent other gas/vapour in street/highway     | 2                 |
| U409400   | [X]Pois/expos ?intent alcohol in street/highway              | 2                 |
| U406y00   | [X]Pois/exp ?intent to hallucinogen other spec place         | 2                 |
| U404300   | [X]Pois/exp ?intent psychotropic drug in sport/athletic area | 2                 |

1  
2  
3  
4  
5  
6  
7  
8  
9  
10  
11  
12  
13  
14  
15  
16  
17  
18  
19  
20  
21  
22  
23  
24  
25  
26  
27  
28  
29  
30  
31  
32  
33  
34  
35  
36  
37  
38  
39  
40  
41  
42  
43  
44  
45  
46  
47  
48  
49  
50  
51  
52  
53  
54  
55  
56  
57  
58  
59  
60

| Read code | Description                                                   | Number of studies |
|-----------|---------------------------------------------------------------|-------------------|
| U40A300   | [X]Pois/exp ?intent org solvent,halogen hydrocarb,sport area  | 2                 |
| U409200   | [X]Pois/exp ?intent alcohol school/pub admin area             | 2                 |
| U205.11   | [X]Overdose - heroin                                          | 2                 |
| U2Az.00   | [X]Intentional self harm by blunt object occ unspecif place   | 2                 |
| U206z00   | [X]Intent self poison hallucinogen unspecif place             | 2                 |
| U209400   | [X]Intent self pois alcohol in street/highway                 | 2                 |
| U292.00   | [X]Intent self harm sharp obj occ sch oth ins/pub adm area    | 2                 |
| U2yy.00   | [X]Intent self harm oth specif means occ oth specif place     | 2                 |
| U2y6.00   | [X]Intent self harm oth specif means occ indust/constr area   | 2                 |
| U2z1.00   | [X]Intent self harm by unspecif means occurrn resid instit'n  | 2                 |
| U27y.00   | [X]Intent self harm by smoke fire/flame occ oth specif plce   | 2                 |
| U295.00   | [X]Intent self harm by sharp object occ trade/service area    | 2                 |
| U296.00   | [X]Intent self harm by sharp object occ indust/constr area    | 2                 |
| U2B1.00   | [X]Intent self harm by jump from high place occ resid instit  | 2                 |
| U213.00   | [X]Intent self harm by hang strangl/suffc sport/athlet area   | 2                 |
| U2Dz.00   | [X]Intent self harm by crash motor vehic occ unspecif place   | 2                 |
| U2A2.00   | [X]Intent self harm blunt obj occ sch oth ins/pub adm area    | 2                 |
| U20Ay00   | [X]Int self pois org solv,halogen hydrocarb,oth spec place    | 2                 |
| U200600   | [X]Int self pois nonopioid analgesic indust/construct area    | 2                 |
| U282.00   | [X]Int self harm by steam hot vapor/obj sch/ins/pub adm area  | 2                 |
| U4C..00   | [X]Falling lying running befor/into moving obj undet intent   | 2                 |
| U4B6.00   | [X]Fall jump/push frm high plce undt intrn indust/constr area | 2                 |
| U47..00   | [X]Exposure to smoke, fire and flames, undetermined intent    | 2                 |
| U470.00   | [X]Exposure to smoke fire+flame undeterm intent occ at home   | 2                 |
| U42..00   | [X]Drowning and submersion, undetermined intent               | 2                 |
| U4D7.00   | [X]Crashng of motor vehicle undetermined intent occ on farm   | 2                 |
| U4D0.00   | [X]Crashng of motor vehicle undetermined intent occ at home   | 2                 |
| U4D..00   | [X]Crashing of motor vehicle, undetermined intent             | 2                 |
| U4D3.00   | [X]Crash of motor vehicle undeterm intent sport/athlet area   | 2                 |
| U4A5.00   | [X]Contct wth blunt obj undet intent occ trade/service area   | 2                 |
| U4A3.00   | [X]Contct wth blunt obj undet intent occ sport/athletic area  | 2                 |
| U4A0.00   | [X]Contact wth blunt object undetermined intent occ at home   | 2                 |
| U48..00   | [X]Contact with steam hot vapours+objects undetermn intent    | 2                 |
| U49..00   | [X]Contact with sharp object, undetermined intent             | 2                 |
| U49z.00   | [X]Contact with sharp obj undeterm intent occ unspecif place  | 2                 |
| U4A..00   | [X]Contact with blunt object, undetermined intent             | 2                 |
| U4Az.00   | [X]Contact with blunt obj undeterm intent occ unspecif place  | 2                 |
| ZX1S.00   | Throwing self onto floor                                      | 2                 |
| 1BDA.00   | Thoughts of deliberate self harm                              | 2                 |
| 1BD3.00   | Suicidal plans                                                | 2                 |
| 1BD1.00   | Suicidal ideation                                             | 2                 |
| 1B19.11   | Suicidal - symptom                                            | 2                 |
| 1B19.00   | Suicidal                                                      | 2                 |
| ZX19200   | Slapping self                                                 | 2                 |
| ZX11.00   | Self-scalding                                                 | 2                 |
| ZX1L300   | Self-mutilation of penis                                      | 2                 |
| ZX1L100   | Self-mutilation of hands                                      | 2                 |
| ZX1L200   | Self-mutilation of genitalia                                  | 2                 |
| ZX1L600   | Self-mutilation of ears                                       | 2                 |
| ZX1L.00   | Self-mutilation                                               | 2                 |
| ZX1G.00   | Scratches self                                                | 2                 |
| ZX19100   | Punching self                                                 | 2                 |
| TN...11   | Poisoning undetermined - accidentally or purposely inflicted  | 2                 |

| Read code | Description                                                  | Number of studies |
|-----------|--------------------------------------------------------------|-------------------|
| ZX1E.00   | Pinching self                                                | 2                 |
| ZX1C.00   | Nipping self                                                 | 2                 |
| 14K1.00   | Intentional overdose of prescription only medication         | 2                 |
| TN0..00   | Injury ?accidental, poisoning by solid/liquid substances     | 2                 |
| TN0z.00   | Injury ?accidental, poisoning by solid or liquid subst NOS   | 2                 |
| TN2y.00   | Injury ?accidental, poisoning by other spec gas or vapour    | 2                 |
| TN04.00   | Injury ?accidental, poisoning by other spec drug/medicament  | 2                 |
| TN02.00   | Injury ?accidental, poisoning by other sedative/hypnotic     | 2                 |
| TN2..00   | Injury ?accidental, poisoning by other gases                 | 2                 |
| TN21.00   | Injury ?accidental, poisoning by other carbon monoxide       | 2                 |
| TN20.00   | Injury ?accidental, poisoning by motor vehicle exhaust gas   | 2                 |
| TN11.00   | Injury ?accidental, poisoning by liquid petrol gas           | 2                 |
| TN1..00   | Injury ?accidental, poisoning by gases in domestic use       | 2                 |
| TN1z.00   | Injury ?accidental, poisoning by gas in domestic use NOS     | 2                 |
| TN10.00   | Injury ?accidental, poisoning by gas distributed by pipeline | 2                 |
| TN05.00   | Injury ?accidental, poisoning by drug or medicament NOS      | 2                 |
| TN06.00   | Injury ?accidental, poisoning by corrosive/caustic substance | 2                 |
| TN08.00   | Injury ?accidental, poisoning by arsenic or its compounds    | 2                 |
| TN00.00   | Injury ?accidental, poisoning by analgesic or anti-pyretic   | 2                 |
| TN07.00   | Injury ?accidental, poisoning by agricultural chemicals      | 2                 |
| TN3..00   | Injury ?accidental, hanging, strangulation and suffocation   | 2                 |
| TN30.00   | Injury ?accidental, hanging                                  | 2                 |
| TN01300   | Injury ?accidental poisoning by Pentobarbitone               | 2                 |
| ZRLfC12   | HoNOS item 2 - non-accidental self injury                    | 2                 |
| ZX19.00   | Hitting self                                                 | 2                 |
| ZX13.00   | Cutting self                                                 | 2                 |
| ZX13.11   | Cuts self                                                    | 2                 |
| ZX12.00   | Burning self                                                 | 2                 |
| ZX11.00   | Biting self                                                  | 2                 |
| ZX11.11   | Bites self                                                   | 2                 |
| SL90.00   | Antidepressant poisoning                                     | 2                 |
| 8G6Z.00   | Anti-suicide psychotherapy NOS                               | 2                 |
| 8G6..00   | Anti-suicide psychotherapy                                   | 2                 |
| SL90z00   | Anti-depressant poisoning NOS                                | 2                 |
| U4z..00   | [X]Unspecified event, undetermined intent                    | 1                 |
| U4zz.00   | [X]Unspecif event undeterm intent occurrn unspecif place     | 1                 |
| U4z3.00   | [X]Unspecif event undeterm intent occurrn sport/athlet area  | 1                 |
| U4zy.00   | [X]Unspecif event undeterm intent occurrn oth specif place   | 1                 |
| U4z6.00   | [X]Unspecif event undeterm intent occurrn indust/constr area | 1                 |
| SyuG.00   | [X]Toxic effects of substances chiefly nonmedicinal source   | 1                 |
| SyuG700   | [X]Toxic effects of other specified gases, fumes & vapours   | 1                 |
| SyuGH00   | [X]Toxic effect of paints and dyes, NEC                      | 1                 |
| SyuGJ00   | [X]Toxic effect of other specified substances                | 1                 |
| SyuG900   | [X]Toxic effect of other pesticides                          | 1                 |
| SyuG800   | [X]Toxic effect of other insecticides                        | 1                 |
| SyuGC00   | [X]Toxic effect of other ingested (parts of) plant(s)        | 1                 |
| SyuG000   | [X]Toxic effect of other alcohols                            | 1                 |
| U2E..00   | [X]Self mutilation                                           | 1                 |
| U406.00   | [X]Poisoning/exposure, ? intent, to hallucinogen             | 1                 |
| SyuFM00   | [X]Poisoning by other psychotropic drugs, NEC                | 1                 |
| SyuFB00   | [X]Poisoning by other opioids                                | 1                 |
| SyuFW00   | [X]Poisoning by other laxatives, incl intestin atonia drugs  | 1                 |
| SyuFT00   | [X]Poisoning by other antihypertensive drugs, NEC            | 1                 |



1  
2  
3  
4  
5  
6  
7  
8  
9  
10  
11  
12  
13  
14  
15  
16  
17  
18  
19  
20  
21  
22  
23  
24  
25  
26  
27  
28  
29  
30  
31  
32  
33  
34  
35  
36  
37  
38  
39  
40  
41  
42  
43  
44  
45  
46  
47  
48  
49  
50  
51  
52  
53  
54  
55  
56  
57  
58  
59  
60

| Read code | Description                                                  | Number of studies |
|-----------|--------------------------------------------------------------|-------------------|
| SyuFD00   | [X]Poisoning by other and unspecified narcotics              | 1                 |
| SyuFA00   | [X]Poisoning by other analgesics, not elsewhere classified   | 1                 |
| SyuF900   | [X]Poisoning by oth nonsteroidal anti-inflamm drugs [NSAID]  | 1                 |
| SyuFc00   | [X]Poisoning by oth & unspecif drugs & biologic substances   | 1                 |
| SyuF.00   | [X]Poisoning by drugs and biological substances              | 1                 |
| U40Bz00   | [X]Pois/expos ?intent to other gas/vapour unspecif place     | 1                 |
| U409100   | [X]Pois/expos ?intent to alcohol at res institut             | 1                 |
| U408400   | [X]Pois/expos ?intent oth/unsp drug/medic in street/highway  | 1                 |
| U40yy00   | [X]Pois/exp ?intent to unspecif chemical other spec place    | 1                 |
| U40By00   | [X]Pois/exp ?intent to other gas/vapour other spec place     | 1                 |
| U202.14   | [X]Overdose - flurazepam                                     | 1                 |
| U4y..00   | [X]Other specified events, undetermined intent               | 1                 |
| U4y0.00   | [X]Other specified event undetermind intent occurrn at home  | 1                 |
| U4y3.00   | [X]Oth specif event undetermin intent occ sport/athlet area  | 1                 |
| Eu15000   | [X]Mnt/beh dis due oth stim inc caffen: acute intoxication   | 1                 |
| Eu18000   | [X]Mental & behav dis due vol solvents: acute intoxication   | 1                 |
| Eu17000   | [X]Mental & behav dis due to use tobacco: acute intoxication | 1                 |
| Eu11000   | [X]Mental & behav dis due to use opioids: acute intoxication | 1                 |
| Eu14000   | [X]Mental & behav dis due to use cocaine: acute intoxication | 1                 |
| Eu10000   | [X]Mental & behav dis due to use alcohol: acute intoxication | 1                 |
| Eu13000   | [X]Mental & behav dis due seds/hypntcs: acute intoxication   | 1                 |
| Eu16000   | [X]Mental & behav dis due hallucinogens: acute intoxicatn    | 1                 |
| Eu12000   | [X]Mental & behav dis due cannabinoids: acute intoxication   | 1                 |
| Eu1A000   | [X]Ment behav dis due use crack cocaine: acute intoxication  | 1                 |
| U39..11   | [X]Intentionally shot with shotgun                           | 1                 |
| U38..11   | [X]Intentionally shot with handgun                           | 1                 |
| U41z.00   | [X]Hangng strangult+suffoct undet intent occ unspecif place  | 1                 |
| U4B0.00   | [X]Fallng jumpng/push frm high place undet intent occ home   | 1                 |
| U81..00   | [X]Evid of alcohol involv determind by level of intoxication | 1                 |
| U4D1.00   | [X]Crashng of motor vehicle undeterm intent resident instit  | 1                 |
| U466.00   | [X]Contct wth explosiv materl undet intnt indust/constr area | 1                 |
| U4A6.00   | [X]Contct wth blunt obj undet intent occ industr/constr area | 1                 |
| U46..00   | [X]Contact with explosive material, undetermined intent      | 1                 |
| U4Ay.00   | [X]Contact with blunt obj undeter intent occ oth specif plce | 1                 |
| U1AC.11   | [X]Accidental poisoning with weedkiller                      | 1                 |
| U1A2.13   | [X]Accidental poisoning with temazepam                       | 1                 |
| U1A2.11   | [X]Accidental poisoning with sleeping tablets                | 1                 |
| U1AC.12   | [X]Accidental poisoning with paraquat                        | 1                 |
| U1A0.11   | [X]Accidental poisoning with paracetamol                     | 1                 |
| U1A2.15   | [X]Accidental poisoning with nitrazepam                      | 1                 |
| U1A0.12   | [X]Accidental poisoning with ibuprofen                       | 1                 |
| U1A5.11   | [X]Accidental poisoning with heroin                          | 1                 |
| U1A2.12   | [X]Accidental poisoning with diazepam                        | 1                 |
| U1A2.16   | [X]Accidental poisoning with benzodiazepine                  | 1                 |
| U1A2.17   | [X]Accidental poisoning with barbiturate                     | 1                 |
| U1A0.13   | [X]Accidental poisoning with aspirin                         | 1                 |
| U1A4.11   | [X]Accidental poisoning with antidepressant                  | 1                 |
| U1A4.12   | [X]Accidental poisoning with amitriptyline                   | 1                 |
| U1A4.13   | [X]Accidental poisoning with SSRI                            | 1                 |
| U1AA.11   | [X]Accidental poisoning from glue solvent                    | 1                 |
| U1AD.00   | [X]Accidental poisoning by and exposure to amfetamine        | 1                 |
| U1A..00   | [X]Accidental poisoning by + exposure to noxious substances  | 1                 |
| U1A..12   | [X]Accidental drug overdose / other poisoning                | 1                 |

| Read code | Description                                                  | Number of studies |
|-----------|--------------------------------------------------------------|-------------------|
| U1A..11   | [X]Accidental drug / other poisoning                         | 1                 |
| U1AB.11   | [X]Accidental carbon monoxide poisoning                      | 1                 |
| U1Ay.00   | [X]Accident poisoning/exposure to unspecif chemical          | 1                 |
| U1A2.00   | [X]Accident poisoning/exposure to sedative hypnotic          | 1                 |
| U1A4.00   | [X]Accident poisoning/exposure to psychotropic drug          | 1                 |
| U1AC.00   | [X]Accident poisoning/exposure to pesticide                  | 1                 |
| U1AB.00   | [X]Accident poisoning/exposure to other gas/vapour           | 1                 |
| U1A7.00   | [X]Accident poisoning/exposure to oth autonomic drug         | 1                 |
| U1A0.00   | [X]Accident poisoning/exposure to nonopioid analgesic        | 1                 |
| U1A5.00   | [X]Accident poisoning/exposure to narcotic drug              | 1                 |
| U1A6.00   | [X]Accident poisoning/exposure to hallucinogen               | 1                 |
| U1A3.00   | [X]Accident poisoning/exposure to antiparkinson drug         | 1                 |
| U1A1.00   | [X]Accident poisoning/exposure to antiepileptic              | 1                 |
| U1A9.00   | [X]Accident poisoning/exposure to alcohol                    | 1                 |
| U1AD000   | [X]Accident poisoning by and exposure to amphetamine - home  | 1                 |
| U1Ay700   | [X]Accident poison/exposure to unspecif chemical on farm     | 1                 |
| U1Ay000   | [X]Accident poison/exposure to unspecif chemical at home     | 1                 |
| U1A2000   | [X]Accident poison/exposure to sedative hypnotic at home     | 1                 |
| U1A4000   | [X]Accident poison/exposure to psychotropic drug at home     | 1                 |
| U1AC700   | [X]Accident poison/exposure to pesticide on farm             | 1                 |
| U1AC000   | [X]Accident poison/exposure to pesticide at home             | 1                 |
| U1A8.00   | [X]Accident poison/exposure to other/unspec drug/medicament  | 1                 |
| U1AB700   | [X]Accident poison/exposure to other gas/vapour on farm      | 1                 |
| U1AB000   | [X]Accident poison/exposure to other gas/vapour at home      | 1                 |
| U1A8000   | [X]Accident poison/exposure to oth/unsp drug/medicam home    | 1                 |
| U1A7000   | [X]Accident poison/exposure to oth autonomic drug at home    | 1                 |
| U1A0000   | [X]Accident poison/exposure to nonopioid analgesic at home   | 1                 |
| U1A5000   | [X]Accident poison/exposure to narcotic drug at home         | 1                 |
| U1A1000   | [X]Accident poison/exposure to antiepileptic at home         | 1                 |
| U1A9000   | [X]Accident poison/exposure to alcohol at home               | 1                 |
| U1AA.00   | [X]Accid poison/exposure to organ solvent,halogen hydrocarb  | 1                 |
| U1Ay500   | [X]Accid poison/expos unspecif chemical trade/service area   | 1                 |
| U1Ayz00   | [X]Accid poison/expos to unspecif chemical unspecif place    | 1                 |
| U1Ay100   | [X]Accid poison/expos to unspecif chemical at res institut   | 1                 |
| U1A2z00   | [X]Accid poison/expos to sedative hypnotic unspecif place    | 1                 |
| U1A4100   | [X]Accid poison/expos to psychotropic drug at res institut   | 1                 |
| U1ABz00   | [X]Accid poison/expos to other gas/vapour unspecif place     | 1                 |
| U1A8100   | [X]Accid poison/expos to oth/unsp drug/medicam res institut  | 1                 |
| U1A8z00   | [X]Accid poison/expos to oth/unsp drug/medic unspecif place  | 1                 |
| U1A7z00   | [X]Accid poison/expos to oth autonomic drug unspecif place   | 1                 |
| U1A0z00   | [X]Accid poison/expos to nonopioid analgesic unspecif place  | 1                 |
| U1A5z00   | [X]Accid poison/expos to narcotic drug unspecif place        | 1                 |
| U1A9z00   | [X]Accid poison/expos to alcohol unspecif place              | 1                 |
| U1AA000   | [X]Accid poison/expos organ solvent,halogen hydrocarb, home  | 1                 |
| U1A3500   | [X]Accid poison/expos antiparkinson drug trade/service area  | 1                 |
| U1A9500   | [X]Accid poison/expos alcohol trade/service area             | 1                 |
| U1A9400   | [X]Accid poison/expos alcohol in street/highway              | 1                 |
| U1Ay200   | [X]Acc poison/expos unspecif chemical school/pub admin area  | 1                 |
| U1A4200   | [X]Acc poison/expos psychotropic drug school/pub admin area  | 1                 |
| U1AA100   | [X]Acc poison/expos org solvent,halogen hydrocarb,res instit | 1                 |
| U1A9200   | [X]Acc poison/expos alcohol school/pub admin area            | 1                 |
| U1ADz00   | [X]Acc poison by and exposure to amphetamine - unspec places | 1                 |
| Sy...00   | [X] Injury and poisoning classification terms                | 1                 |

1  
2  
3  
4  
5  
6  
7  
8  
9  
10  
11  
12  
13  
14  
15  
16  
17  
18  
19  
20  
21  
22  
23  
24  
25  
26  
27  
28  
29  
30  
31  
32  
33  
34  
35  
36  
37  
38  
39  
40  
41  
42  
43  
44  
45  
46  
47  
48  
49  
50  
51  
52  
53  
54  
55  
56  
57  
58  
59  
60

| Read code | Description                                               | Number of studies |
|-----------|-----------------------------------------------------------|-------------------|
| U60F412   | [X] Adverse reaction to acetylcysteine                    | 1                 |
| ZV15600   | [V]Personal history of poisoning                          | 1                 |
| ZV4C400   | [V]Occupational exposure to toxic agents in agriculture   | 1                 |
| ZV71A00   | [V]Obs for suspected toxic effect from ingested substance | 1                 |
| SLC7100   | Zinc salt poisoning                                       | 1                 |
| SM01100   | Wood alcohol causing toxic effect                         | 1                 |
| SLEz.00   | Water, mineral or uric acid metabolism poisoning NOS      | 1                 |
| SLE..00   | Water, mineral and urate metabolism poisoning             | 1                 |
| SL42300   | Warfarin sodium poisoning                                 | 1                 |
| SL42400   | Warfarin poisoning                                        | 1                 |
| SL35z00   | Vitamin poisoning NOS                                     | 1                 |
| SL35.00   | Vitamin poisoning NEC                                     | 1                 |
| SL35100   | Vitamin D poisoning                                       | 1                 |
| SL35000   | Vitamin A poisoning                                       | 1                 |
| SL44300   | Urokinase poisoning                                       | 1                 |
| SLE7.00   | Uric acid drug poisoning                                  | 1                 |
| SLE7.11   | Urate metabolism drug poisoning                           | 1                 |
| SM9z.00   | Unspecified substance causing toxic effect NOS            | 1                 |
| SL50000   | Unspecified opium poisoning                               | 1                 |
| SL30400   | Tripelennamine poisoning                                  | 1                 |
| SL60100   | Trimethadione poisoning                                   | 1                 |
| SL92200   | Trifluoperidol poisoning                                  | 1                 |
| SM23100   | Trichloroethylene causing toxic effect                    | 1                 |
| SL90300   | Trazodone poisoning                                       | 1                 |
| SL95z00   | Tranquilliser poisoning NOS                               | 1                 |
| SL9..11   | Tranquilliser poisoning                                   | 1                 |
| TE57.00   | Toxic reactions caused by other plants                    | 1                 |
| F036200   | Toxic encephalitis due to thallium                        | 1                 |
| F036100   | Toxic encephalitis due to mercury                         | 1                 |
| F036000   | Toxic encephalitis due to lead                            | 1                 |
| SMC..00   | Toxic effect of tobacco and nicotine                      | 1                 |
| SM57.00   | Toxic effect of tin and its compounds                     | 1                 |
| SM9A.00   | Toxic effect of rodenticides                              | 1                 |
| SMX..00   | Toxic effect of paints and dyes, NEC                      | 1                 |
| SM9X.00   | Toxic effect of nitroglycerin & oth nitric acids & ester  | 1                 |
| SM79.00   | Toxic effect of hydrogen sulfide                          | 1                 |
| SM15.00   | Toxic effect of homologues of benzene                     | 1                 |
| SM98.00   | Toxic effect of herbicides and fungicides                 | 1                 |
| SMB..00   | Toxic effect of formaldehyde                              | 1                 |
| SM78.00   | Toxic effect of fluorine gas and hydrogen fluoride        | 1                 |
| SM23200   | Toxic effect of chloroform                                | 1                 |
| SM7A.00   | Toxic effect of carbon dioxide                            | 1                 |
| SLG7.00   | Topical dental drug poisoning                             | 1                 |
| SL85.00   | Topical and infiltration anaesthetic agent poisoning      | 1                 |
| SL16200   | Tiabendazole poisoning                                    | 1                 |
| SL27.00   | Thyroid hormone and thyroid derivatives poisoning         | 1                 |
| SL27z00   | Thyroid hormone and thyroid derivative poisoning NOS      | 1                 |
| SL27300   | Thyroglobulin poisoning                                   | 1                 |
| SL91400   | Thioridazine poisoning                                    | 1                 |
| SLE1100   | Theophylline poisoning                                    | 1                 |
| SL04000   | Tetracycline poisoning                                    | 1                 |
| SL04z00   | Tetracycline group poisoning NOS                          | 1                 |
| SL04.00   | Tetracycline group poisoning                              | 1                 |

| Read code | Description                                           | Number of studies |
|-----------|-------------------------------------------------------|-------------------|
| SM23000   | Tetrachloroethylene causing toxic effect              | 1                 |
| SL85300   | Tetracaine poisoning                                  | 1                 |
| SL21300   | Testosterone poisoning                                | 1                 |
| SLF5200   | Terpin hydrate poisoning                              | 1                 |
| SL3z.00   | Systemic agent poisoning NOS                          | 1                 |
| SLB2.00   | Sympathomimetic poisoning                             | 1                 |
| SM31200   | Sulphuric acid causing toxic effect                   | 1                 |
| SM73.00   | Sulphur dioxide causing toxic effect                  | 1                 |
| SL1x400   | Sulphone poisoning                                    | 1                 |
| SL10.00   | Sulphonamide poisoning                                | 1                 |
| SL10200   | Sulfamethoxazole poisoning                            | 1                 |
| SL10000   | Sulfadiazine poisoning                                | 1                 |
| 1BD4.00   | Suicide risk                                          | 1                 |
| ZRn3.00   | Suicide intent score subscale - attempt circumstances | 1                 |
| SN47100   | Suffocation by strangulation                          | 1                 |
| SL06300   | Streptomycin poisoning                                | 1                 |
| SL44200   | Streptokinase poisoning                               | 1                 |
| SL97.11   | Stimulant poisoning                                   | 1                 |
| SM2z.00   | Solvents causing toxic effect NOS                     | 1                 |
| SLC7000   | Sodium morrhuate poisoning                            | 1                 |
| SM32200   | Sodium hydroxide causing toxic effect                 | 1                 |
| SM90100   | Sodium cyanide causing toxic effect                   | 1                 |
| SM96.00   | Soap and detergent causing toxic effect               | 1                 |
| SM96.12   | Soap - toxic effect                                   | 1                 |
| SLF1.00   | Smooth muscle relaxant poisoning                      | 1                 |
| SL7z.11   | Sleeping drug poisoning                               | 1                 |
| SLF2.00   | Skeletal muscle relaxant poisoning                    | 1                 |
| ZX1..00   | Self-injurious behaviour                              | 1                 |
| ZX...00   | Self-harm                                             | 1                 |
| ZX...11   | Self-damage                                           | 1                 |
| SL7..12   | Sedative poisoning                                    | 1                 |
| SL7z.00   | Sedative and hypnotic drug poisoning NOS              | 1                 |
| SL7..00   | Sedative and hypnotic drug poisoning                  | 1                 |
| SL70500   | Secobarbital poisoning                                | 1                 |
| SL51100   | Salicylic acid salt poisoning                         | 1                 |
| SL51z00   | Salicylate poisoning NOS                              | 1                 |
| SL51.00   | Salicylate poisoning                                  | 1                 |
| SLF7100   | Salbutamol poisoning                                  | 1                 |
| ZX1..12   | SIB - Self-injurious behaviour                        | 1                 |
| SM02200   | Rubbing alcohol causing toxic effect                  | 1                 |
| SL06200   | Rifampicin poisoning                                  | 1                 |
| SLF..12   | Respiratory system drug poisoning                     | 1                 |
| SL14500   | Quinine poisoning                                     | 1                 |
| SLC0300   | Quinidine poisoning                                   | 1                 |
| SL14400   | Pyrimethamine poisoning                               | 1                 |
| SL53.00   | Pyrazole derivative poisoning                         | 1                 |
| SL9z.00   | Psychotropic agent poisoning NOS                      | 1                 |
| SL9..00   | Psychotropic agent poisoning                          | 1                 |
| SL97.00   | Psychostimulant poisoning                             | 1                 |
| SL96400   | Psilocybin poisoning                                  | 1                 |
| SL45100   | Protamine sulphate poisoning                          | 1                 |
| SLF0200   | Prostaglandin poisoning                               | 1                 |
| SLC0200   | Propranolol poisoning                                 | 1                 |

1  
2  
3  
4  
5  
6  
7  
8  
9  
10  
11  
12  
13  
14  
15  
16  
17  
18  
19  
20  
21  
22  
23  
24  
25  
26  
27  
28  
29  
30  
31  
32  
33  
34  
35  
36  
37  
38  
39  
40  
41  
42  
43  
44  
45  
46  
47  
48  
49  
50  
51  
52  
53  
54  
55  
56  
57  
58  
59  
60

| Read code | Description                                                | Number of studies |
|-----------|------------------------------------------------------------|-------------------|
| SM70100   | Propane causing toxic effect                               | 1                 |
| SL91300   | Promazine poisoning                                        | 1                 |
| SL14300   | Proguanil poisoning                                        | 1                 |
| SL22300   | Progestogen poisoning                                      | 1                 |
| SL91200   | Prochlorperazine poisoning                                 | 1                 |
| SLC0100   | Procainamide poisoning                                     | 1                 |
| SL6x000   | Primidone poisoning                                        | 1                 |
| 8G61.00   | Potential suicide care                                     | 1                 |
| SM32100   | Potassium hydroxide causing toxic effect                   | 1                 |
| SM90000   | Potassium cyanide causing toxic effect                     | 1                 |
| SL25.00   | Posterior pituitary hormone poisoning                      | 1                 |
| SL94600   | Poisoning by temazepam                                     | 1                 |
| SLD3100   | Poisoning by saline and osmotic laxatives                  | 1                 |
| SL3..00   | Poisoning by primarily systemic agents                     | 1                 |
| SLX..00   | Poisoning by oth & unspec antipsychotics & neuroleptics    | 1                 |
| SL29.00   | Poisoning by mineralocorticoids and their antagonists      | 1                 |
| SLD0200   | Poisoning by histamine H2-receptor antagonists             | 1                 |
| SL20300   | Poisoning by glucocorticoids and synthetic analogues       | 1                 |
| SL...16   | Poisoning by drug and biological substances                | 1                 |
| SL6x100   | Poisoning by carbamazepine                                 | 1                 |
| SLC9.00   | Poisoning by calcium-channel blockers                      | 1                 |
| SLC6400   | Poisoning by angiotensin-converting-enzyme inhibitors      | 1                 |
| SL...00   | Poisoning                                                  | 1                 |
| SM82.12   | Plants - toxic effect                                      | 1                 |
| 1BDB.00   | Plans for deliberate self harm without intent              | 1                 |
| SL16100   | Piperazine poisoning                                       | 1                 |
| SLB0200   | Pilocarpine poisoning                                      | 1                 |
| SM7y000   | Phosgene causing toxic effect                              | 1                 |
| SM93500   | Phosdrin causing toxic effect                              | 1                 |
| SL61000   | Phenytoin poisoning                                        | 1                 |
| SL53100   | Phenylbutazone poisoning                                   | 1                 |
| SLB3000   | Phenoxybenzamine poisoning                                 | 1                 |
| SL91z00   | Phenothiazine poisoning NOS                                | 1                 |
| SL91.00   | Phenothiazine poisoning                                    | 1                 |
| SLD1200   | Phenolphthalein poisoning                                  | 1                 |
| SM30000   | Phenol causing toxic effect                                | 1                 |
| SL70400   | Phenobarbital poisoning                                    | 1                 |
| SL42200   | Phenindione poisoning                                      | 1                 |
| SL52200   | Phenacetin poisoning                                       | 1                 |
| SLH4.00   | Pharmaceutical excipient poisoning                         | 1                 |
| SM1z.00   | Petroleum product causing toxic effect NOS                 | 1                 |
| SM1..00   | Petroleum product causing toxic effect                     | 1                 |
| SM14.00   | Petroleum ether causing toxic effect                       | 1                 |
| SM10.00   | Petrol unspecified causing toxic effect                    | 1                 |
| SL86.00   | Peripheral nerve and plexus-blocking anaesthetic poisoning | 1                 |
| SL70300   | Pentobarbitone poisoning                                   | 1                 |
| SL34000   | Penicillinase poisoning                                    | 1                 |
| SL00z00   | Penicillin poisoning NOS                                   | 1                 |
| SL00.00   | Penicillin poisoning                                       | 1                 |
| SL00300   | Penicillin G poisoning                                     | 1                 |
| E022.00   | Pathological drug intoxication                             | 1                 |
| E014.00   | Pathological alcohol intoxication                          | 1                 |
| SM93300   | Parathion causing toxic effect                             | 1                 |

| Read code | Description                                                | Number of studies |
|-----------|------------------------------------------------------------|-------------------|
| SLB0.00   | Parasympathomimetic poisoning                              | 1                 |
| SL60000   | Paramethadione poisoning                                   | 1                 |
| SM13.00   | Paraffin wax causing toxic effect                          | 1                 |
| SL52100   | Paracetamol poisoning                                      | 1                 |
| SL1x300   | Para-aminosalicylic acid poisoning                         | 1                 |
| SLC5200   | Papaverine poisoning                                       | 1                 |
| SLD4100   | Papain poisoning                                           | 1                 |
| SLD4000   | Pancreatin poisoning                                       | 1                 |
| SL04300   | Oxytetracycline poisoning                                  | 1                 |
| SL21200   | Oxymetholone poisoning                                     | 1                 |
| SL22z00   | Ovarian hormone poisoning NOS                              | 1                 |
| SL22.00   | Ovarian hormone and synthetic substitute poisoning         | 1                 |
| SLC5.00   | Other vasodilator poisoning                                | 1                 |
| SL95.00   | Other tranquilliser poisoning                              | 1                 |
| F377.00   | Other toxic agent polyneuropathy                           | 1                 |
| SL3y.00   | Other systemic agent poisoning                             | 1                 |
| SM9y.00   | Other substance causing toxic effect                       | 1                 |
| SL0y.00   | Other specific antibiotic poisoning                        | 1                 |
| SM2yz00   | Other solvents causing toxic effect NOS                    | 1                 |
| SM2..00   | Other solvents causing toxic effect                        | 1                 |
| SM2y.00   | Other solvents causing toxic effect                        | 1                 |
| SLGx.00   | Other skin and mucous membrane drug poisoning              | 1                 |
| SL7y.00   | Other sedative and hypnotic poisoning                      | 1                 |
| SLFy.00   | Other respiratory system drug poisoning                    | 1                 |
| SL9y.00   | Other psychotropic agent poisoning                         | 1                 |
| SM94.00   | Other pesticides causing toxic effect NEC                  | 1                 |
| SM8y.00   | Other noxious substance eaten as food causing toxic effect | 1                 |
| SM9..00   | Other nonmedicinal substances causing toxic effect         | 1                 |
| SL5x.00   | Other non-narcotic analgesic poisoning                     | 1                 |
| SLF3.00   | Other muscle drug poisoning                                | 1                 |
| SLE6.00   | Other mineral salt poisoning NEC                           | 1                 |
| SM5y.00   | Other metals causing toxic effect OS                       | 1                 |
| SM5yz00   | Other metals causing toxic effect NOS                      | 1                 |
| SM5..00   | Other metals causing toxic effect                          | 1                 |
| SLC6.00   | Other hypertensive agent poisoning                         | 1                 |
| SM71.00   | Other hydrocarbon gas causing toxic effect                 | 1                 |
| SL2y.00   | Other hormone or synthetic derivative poisoning            | 1                 |
| SLDy.00   | Other gastrointestinal agent poisoning                     | 1                 |
| SM7..00   | Other gases, fumes or vapours causing toxic effect         | 1                 |
| SM7y.00   | Other gas, fume or vapour causing toxic effect             | 1                 |
| SM7yz00   | Other gas, fume and vapour causing toxic effect NOS        | 1                 |
| SLHy.00   | Other drug and medicament poisoning OS                     | 1                 |
| SLHyz00   | Other drug and medicament poisoning NOS                    | 1                 |
| SLE4z00   | Other diuretic poisoning NOS                               | 1                 |
| SLC1100   | Other digitalis glycoside poisoning                        | 1                 |
| SLAy.00   | Other central nervous system stimulant poisoning           | 1                 |
| SLD3.00   | Other cathartic poisoning                                  | 1                 |
| SL93.00   | Other antipsychotics/neuroleptics/tranquilliser poisoning  | 1                 |
| SL15.00   | Other antiprotozoal drug poisoning                         | 1                 |
| SL30x00   | Other antihistamine poisoning                              | 1                 |
| SL6x.00   | Other anticonvulsant poisoning                             | 1                 |
| SL1..00   | Other anti-infective poisoning                             | 1                 |
| SL1y.00   | Other anti-infective poisoning                             | 1                 |

1  
2  
3  
4  
5  
6  
7  
8  
9  
10  
11  
12  
13  
14  
15  
16  
17  
18  
19  
20  
21  
22  
23  
24  
25  
26  
27  
28  
29  
30  
31  
32  
33  
34  
35  
36  
37  
38  
39  
40  
41  
42  
43  
44  
45  
46  
47  
48  
49  
50  
51  
52  
53  
54  
55  
56  
57  
58  
59  
60

| Read code | Description                                              | Number of studies |
|-----------|----------------------------------------------------------|-------------------|
| SLH..00   | Other and unspecified drug and medicament poisoning      | 1                 |
| SL5yz00   | Other analgesic or antipyretic poisoning NOS             | 1                 |
| SL5y.00   | Other analgesic and antipyretic poisoning                | 1                 |
| SM0y.00   | Other alcohol causing toxic effect                       | 1                 |
| SM93z00   | Organophosphate and carbamate causing toxic effect NOS   | 1                 |
| SM93.00   | Organophosphate and carbamate causing toxic effect       | 1                 |
| SLF1100   | Orciprenaline poisoning                                  | 1                 |
| SL22000   | Oral contraceptive poisoning                             | 1                 |
| SL50.12   | Opiate poisoning                                         | 1                 |
| SL50z00   | Opiate or narcotic poisoning NOS                         | 1                 |
| SLA1z00   | Opiate antagonist poisoning NOS                          | 1                 |
| SLA1.00   | Opiate antagonist poisoning                              | 1                 |
| SL50.00   | Opiate and narcotic poisoning                            | 1                 |
| SL03100   | Oleandomycin poisoning                                   | 1                 |
| SL22100   | Oestrogen poisoning                                      | 1                 |
| SL01200   | Nystatin poisoning                                       | 1                 |
| SM8z.00   | Noxious substance eaten as food causing toxic effect NOS | 1                 |
| SM8..00   | Noxious substance eaten as food causing toxic effect     | 1                 |
| SLB2100   | Noradrenalin poisoning                                   | 1                 |
| SM...00   | Nonmedicinal agent causing toxic effects                 | 1                 |
| SL5xz00   | Non-narcotic analgesic poisoning NOS                     | 1                 |
| SMz..00   | Non-medicinal agent causing toxic effect NOS             | 1                 |
| SL82100   | Nitrous oxide poisoning                                  | 1                 |
| SM72.00   | Nitrogen oxides causing toxic effect                     | 1                 |
| SM72000   | Nitrogen dioxide causing toxic effect                    | 1                 |
| SL1y100   | Nitrofurantoin poisoning                                 | 1                 |
| SM31100   | Nitric acid causing toxic effect                         | 1                 |
| SL94500   | Nitrazepam poisoning                                     | 1                 |
| SLC4100   | Nitrate poisoning                                        | 1                 |
| SM5y300   | Nickel compounds causing toxic effect                    | 1                 |
| SL50.11   | Narcotic poisoning                                       | 1                 |
| SL54300   | Naproxen poisoning                                       | 1                 |
| SL21100   | Nandrolone poisoning                                     | 1                 |
| SM81.00   | Mushrooms causing toxic effect                           | 1                 |
| SLF..11   | Muscle drug poisoning                                    | 1                 |
| SL50500   | Morphine poisoning                                       | 1                 |
| 1BD2.00   | Morbid thoughts                                          | 1                 |
| SL90200   | Monoamine oxidase inhibitor poisoning                    | 1                 |
| 1BD6.00   | Moderate suicide risk                                    | 1                 |
| SL76.00   | Mixed sedative poisoning NEC                             | 1                 |
| SL07400   | Mitomycin poisoning                                      | 1                 |
| SL04200   | Minocycline poisoning                                    | 1                 |
| SM01.00   | Methyl alcohol causing toxic effect                      | 1                 |
| SL80100   | Methocarbamol poisoning                                  | 1                 |
| SL74.00   | Methaqualone compound poisoning                          | 1                 |
| SM01000   | Methanol causing toxic effect                            | 1                 |
| SL50200   | Methadone poisoning                                      | 1                 |
| SM5z.00   | Metals causing toxic effect NOS                          | 1                 |
| SL12300   | Mercury compound poisoning                               | 1                 |
| SM50.00   | Mercury causing toxic effect                             | 1                 |
| SL31600   | Mercaptopurine poisoning                                 | 1                 |
| SL95100   | Meprobamate poisoning                                    | 1                 |
| SL50400   | Meperidine (pethidine) poisoning                         | 1                 |

| Read code | Description                                                  | Number of studies |
|-----------|--------------------------------------------------------------|-------------------|
| SL54400   | Mefenamic acid poisoning                                     | 1                 |
| SL...13   | Medicinal poisoning                                          | 1                 |
| SL94400   | Medazepam poisoning                                          | 1                 |
| SL96200   | Marihuana poisoning                                          | 1                 |
| SM93200   | Malathion causing toxic effect                               | 1                 |
| SLD0100   | Magnesium trisilicate poisoning                              | 1                 |
| SLD3000   | Magnesium sulphate poisoning                                 | 1                 |
| T180.00   | MVTA - accid poisoning - exhaust gas of moving motor vehicle | 1                 |
| SL90211   | MAOI - monoamine oxidase inhibitor poisoning                 | 1                 |
| SL96100   | Lysergide (LSD) poisoning                                    | 1                 |
| 1BD7.00   | Low suicide risk                                             | 1                 |
| SL94300   | Lorazepam poisoning                                          | 1                 |
| SLG2.12   | Local detergent poisoning                                    | 1                 |
| SLG2.11   | Local astringent poisoning                                   | 1                 |
| SLG2.00   | Local astringent and detergent poisoning                     | 1                 |
| SLG0.00   | Local anti-infective and anti-inflammatory poisoning         | 1                 |
| SL8z.00   | Local anaesthetic poisoning NOS                              | 1                 |
| SLA0000   | Lobeline poisoning                                           | 1                 |
| 44W8100   | Lithium level high - toxic                                   | 1                 |
| SM70.00   | Liquefied petrol gas causing toxic effect                    | 1                 |
| SL85100   | Lidocaine poisoning                                          | 1                 |
| SL27100   | Levothyroxine sodium poisoning                               | 1                 |
| SL6y200   | Levodopa (L-dopa) poisoning                                  | 1                 |
| SL12200   | Lead compound poisoning                                      | 1                 |
| SM4z.00   | Lead compound causing toxic effect NOS                       | 1                 |
| SM4..00   | Lead and lead compounds causing toxic effect                 | 1                 |
| SM41000   | Lead acetate causing toxic effect                            | 1                 |
| TH02.00   | Late effects of accidental poisoning                         | 1                 |
| SC...00   | Late effects injury/poisoning/toxic effects/external causes  | 1                 |
| SC41.00   | Late effect of poison due to nonmedical substance            | 1                 |
| SC40.00   | Late effect of poison drug/medicament/biological substance   | 1                 |
| SC41.11   | Late effect of poison                                        | 1                 |
| SCz..00   | Late effect injury/poison/toxin effect/external cause NOS    | 1                 |
| SL83000   | Ketamine poisoning                                           | 1                 |
| SM12.00   | Kerosene causing toxic effect                                | 1                 |
| SLG4.12   | Keratoplastic poisoning                                      | 1                 |
| SL1x200   | Isoniazid poisoning                                          | 1                 |
| SLD1.00   | Irritant cathartic poisoning                                 | 1                 |
| SM5y200   | Iron compounds causing toxic effect                          | 1                 |
| SL40z00   | Iron and iron compound poisoning NOS                         | 1                 |
| SL40.00   | Iron and iron compound poisoning                             | 1                 |
| SL28000   | Iodide poisoning                                             | 1                 |
| SP35000   | Intoxication by serum                                        | 1                 |
| E250.14   | Intoxication - alcohol                                       | 1                 |
| 1BDC.00   | Intent of deliberate self harm with detailed plans           | 1                 |
| SL23.00   | Insulins and antidiabetic poisoning                          | 1                 |
| SL23400   | Insulin poisoning                                            | 1                 |
| TN...00   | Injury undetermined whether accidentally/purposely inflicted | 1                 |
| TNz..00   | Injury undetermined accidental or purposely inflicted NOS    | 1                 |
| TM21.00   | Injury due to legal intervention by poisoning by gas         | 1                 |
| Sz...00   | Injury and poisoning NOS                                     | 1                 |
| S....00   | Injury and poisoning                                         | 1                 |
| TN3y.00   | Injury ?accidental, other means of hang/strangle/suffocate   | 1                 |



1  
2  
3  
4  
5  
6  
7  
8  
9  
10  
11  
12  
13  
14  
15  
16  
17  
18  
19  
20  
21  
22  
23  
24  
25  
26  
27  
28  
29  
30  
31  
32  
33  
34  
35  
36  
37  
38  
39  
40  
41  
42  
43  
44  
45  
46  
47  
48  
49  
50  
51  
52  
53  
54  
55  
56  
57  
58  
59  
60

| Read code | Description                                                  | Number of studies |
|-----------|--------------------------------------------------------------|-------------------|
| TN9..00   | Injury ?accidental, late effects                             | 1                 |
| TN3z.00   | Injury ?accidental, hanging/strangulation/suffocation NOS    | 1                 |
| TN70.00   | Injury ?accidental, fall from residential premises           | 1                 |
| TN71.00   | Injury ?accidental, fall from other man-made structure       | 1                 |
| TN72.00   | Injury ?accidental, fall from natural site                   | 1                 |
| TN7z.00   | Injury ?accidental, fall from high place NOS                 | 1                 |
| TN7..00   | Injury ?accidental, fall from high place                     | 1                 |
| TN4..00   | Injury ?accidental, drowning                                 | 1                 |
| TN61.00   | Injury ?accidental, by stabbing instrument                   | 1                 |
| TN51.00   | Injury ?accidental, by shotgun                               | 1                 |
| TN82.00   | Injury ?accidental, by scald                                 | 1                 |
| TN8y.00   | Injury ?accidental, by other specified means                 | 1                 |
| TN8..00   | Injury ?accidental, by other means                           | 1                 |
| TN54.00   | Injury ?accidental, by other firearm                         | 1                 |
| TN8z.00   | Injury ?accidental, by means NOS                             | 1                 |
| TN80100   | Injury ?accidental, by lying before moving object            | 1                 |
| TN80.00   | Injury ?accidental, by jumping or lying before moving object | 1                 |
| TN80000   | Injury ?accidental, by jumping before moving object          | 1                 |
| TN52.00   | Injury ?accidental, by hunting rifle                         | 1                 |
| TN50.00   | Injury ?accidental, by handgun                               | 1                 |
| TN5..00   | Injury ?accidental, by firearms and explosives               | 1                 |
| TN5z.00   | Injury ?accidental, by firearm or explosive NOS              | 1                 |
| TN83.00   | Injury ?accidental, by extremes of cold                      | 1                 |
| TN55.00   | Injury ?accidental, by explosive                             | 1                 |
| TN84.00   | Injury ?accidental, by electrocution                         | 1                 |
| TN6z.00   | Injury ?accidental, by cutting or stabbing instrument NOS    | 1                 |
| TN60.00   | Injury ?accidental, by cutting instrument                    | 1                 |
| TN6..00   | Injury ?accidental, by cutting and stabbing instruments      | 1                 |
| TN85.00   | Injury ?accidental, by crashing of motor vehicle             | 1                 |
| TN86.00   | Injury ?accidental, by crashing of aircraft                  | 1                 |
| TN87.00   | Injury ?accidental, by caustic substances, except poisoning  | 1                 |
| TN81.00   | Injury ?accidental, by burns or fire                         | 1                 |
| SL54100   | Indometacin poisoning                                        | 1                 |
| SL31.12   | Immunosuppressive poisoning                                  | 1                 |
| SL90100   | Imipramine poisoning                                         | 1                 |
| SL54200   | Ibuprofen poisoning                                          | 1                 |
| SL7..11   | Hypnotic poisoning                                           | 1                 |
| SLC6z00   | Hypertensive agent poisoning NOS                             | 1                 |
| SLB1200   | Hyoscine poisoning                                           | 1                 |
| SL95000   | Hydroxyzine poisoning                                        | 1                 |
| SL13.11   | Hydroxyquinoline poisoning                                   | 1                 |
| SM31000   | Hydrochloric acid causing toxic effect                       | 1                 |
| SL61.00   | Hydantoin derivative poisoning                               | 1                 |
| SL47100   | Human fibrinogen poisoning                                   | 1                 |
| SL2z.00   | Hormone or synthetic substitute poisoning NOS                | 1                 |
| SL2..00   | Hormone and synthetic substitute poisoning                   | 1                 |
| 1BD5.00   | High suicide risk                                            | 1                 |
| SL50100   | Heroin poisoning                                             | 1                 |
| SL42100   | Heparin poisoning                                            | 1                 |
| SL12z00   | Heavy metal anti-infective poisoning NOS                     | 1                 |
| SL12.00   | Heavy metal anti-infective poisoning                         | 1                 |
| SL3y000   | Heavy metal agonist poisoning                                | 1                 |
| 1BD..00   | Harmful thoughts                                             | 1                 |

| Read code | Description                                                 | Number of studies |
|-----------|-------------------------------------------------------------|-------------------|
| SL81.00   | Halothane poisoning                                         | 1                 |
| SL92000   | Haloperidol poisoning                                       | 1                 |
| SL96z00   | Hallucinogen poisoning NOS                                  | 1                 |
| SL96.00   | Hallucinogen poisoning                                      | 1                 |
| SLG4.00   | Hair treatment poisoning                                    | 1                 |
| 14K0.00   | H/O: repeated overdose                                      | 1                 |
| 14K..00   | H/O: poisoning                                              | 1                 |
| SL24211   | Growth hormone poisoning                                    | 1                 |
| SL01100   | Griseofulvin poisoning                                      | 1                 |
| SL24100   | Gonadotrophin poisoning                                     | 1                 |
| SL54000   | Gold salt poisoning                                         | 1                 |
| SLDz.00   | Gastrointestinal agent poisoning NOS                        | 1                 |
| SLD..00   | Gastrointestinal agent poisoning                            | 1                 |
| SM7z.00   | Gases, fumes or vapours causing toxic effect NOS            | 1                 |
| SLC3z00   | Ganglion-blocker poisoning NOS                              | 1                 |
| SLC3.00   | Ganglion-blocker poisoning                                  | 1                 |
| SM03z00   | Fusel oil causing toxic effect NOS                          | 1                 |
| SLE4100   | Furosemide poisoning                                        | 1                 |
| SM74.00   | Freon causing toxic effect                                  | 1                 |
| SL41000   | Folic acid poisoning                                        | 1                 |
| SL94200   | Flurazepam poisoning                                        | 1                 |
| SL91100   | Fluphenazine poisoning                                      | 1                 |
| SL31500   | Fluorouracil poisoning                                      | 1                 |
| SL1y000   | Flucytosine poisoning                                       | 1                 |
| SL40100   | Ferrous sulphate poisoning                                  | 1                 |
| SL40000   | Ferric salt poisoning                                       | 1                 |
| SLG..00   | Eye, otorhinolaryngological, skin and dental drug poisoning | 1                 |
| SLG5z00   | Eye drug poisoning NOS                                      | 1                 |
| SLG5.00   | Eye drug poisoning NEC                                      | 1                 |
| SLG..12   | Eye drug poisoning                                          | 1                 |
| SLF5.00   | Expectorant poisoning                                       | 1                 |
| SM00z00   | Ethyl alcohol causing toxic effect NOS                      | 1                 |
| SM00.00   | Ethyl alcohol causing toxic effect                          | 1                 |
| SL6y100   | Ethopropazine poisoning                                     | 1                 |
| SL82000   | Ether poisoning                                             | 1                 |
| SM00000   | Ethanol causing toxic effect                                | 1                 |
| SL1x000   | Ethambutol poisoning                                        | 1                 |
| SLE4000   | Ethacrynic acid poisoning                                   | 1                 |
| SL03000   | Erythromycin poisoning                                      | 1                 |
| SL03.00   | Erythromycin and macrolide poisoning                        | 1                 |
| SLF0000   | Ergot alkaloid poisoning                                    | 1                 |
| E230200   | Episodic acute alcoholic intoxication in alcoholism         | 1                 |
| SL34.00   | Enzyme poisoning NEC                                        | 1                 |
| SLG3.00   | Emollients, demulcents and protectant poisoning             | 1                 |
| SLD2.00   | Emollient cathartic poisoning                               | 1                 |
| SLD6.00   | Emetic drug poisoning                                       | 1                 |
| SLE5.00   | Electrolyte agent poisoning                                 | 1                 |
| SL97200   | Ecstasy poisoning                                           | 1                 |
| SLG6.00   | Ear, nose and throat drug poisoning NEC                     | 1                 |
| SLz..00   | Drug, medicament or biological substance poisoning NOS      | 1                 |
| SL...12   | Drug poisoning                                              | 1                 |
| SL04100   | Doxycycline poisoning                                       | 1                 |
| SLE..11   | Diuretic poisoning                                          | 1                 |

1  
2  
3  
4  
5  
6  
7  
8  
9  
10  
11  
12  
13  
14  
15  
16  
17  
18  
19  
20  
21  
22  
23  
24  
25  
26  
27  
28  
29  
30  
31  
32  
33  
34  
35  
36  
37  
38  
39  
40  
41  
42  
43  
44  
45  
46  
47  
48  
49  
50  
51  
52  
53  
54  
55  
56  
57  
58  
59  
60

| Read code | Description                                            | Number of studies |
|-----------|--------------------------------------------------------|-------------------|
| SLC4000   | Dipyridamole poisoning                                 | 1                 |
| SL30100   | Diphenhydramine poisoning                              | 1                 |
| SLD2000   | Diocetyl sulphosuccinate poisoning                     | 1                 |
| SM02000   | Dimethyl carbinol causing toxic effect                 | 1                 |
| SL50700   | Dihydrocodeine poisoning                               | 1                 |
| SLC1000   | Digoxin poisoning                                      | 1                 |
| SLD4.00   | Digestant poisoning                                    | 1                 |
| SL94100   | Diazepam poisoning                                     | 1                 |
| SLHy100   | Diagnostic agent NEC, poisoning                        | 1                 |
| SL50600   | Dextropropoxyphene poisoning                           | 1                 |
| SLF4000   | Dextromethorphan poisoning                             | 1                 |
| SM96.11   | Detergent toxic effect                                 | 1                 |
| SM00100   | Denatured alcohol causing toxic effect                 | 1                 |
| ZX1..13   | Deliberate self-harm                                   | 1                 |
| SL07300   | Daunorubicin poisoning                                 | 1                 |
| SL07100   | Dactinomycin poisoning                                 | 1                 |
| SM92200   | DDT causing toxic effect                               | 1                 |
| SL31400   | Cytarabine poisoning                                   | 1                 |
| SL31300   | Cyclophosphamide poisoning                             | 1                 |
| SLC5000   | Cyclandelate poisoning                                 | 1                 |
| SM90z00   | Cyanides causing toxic effect NOS                      | 1                 |
| SM90.00   | Cyanides and hydrocyanic acid causing toxic effect     | 1                 |
| ZX13100   | Cutting own wrists                                     | 1                 |
| SL42000   | Coumarin poisoning                                     | 1                 |
| SL20000   | Cortisone derivative poisoning                         | 1                 |
| SL24000   | Corticotropin poisoning                                | 1                 |
| SM3..00   | Corrosives/acids/caustic alkalis causing toxic effect  | 1                 |
| SM3z.00   | Corrosive/acid/caustic alkali causing toxic effect NOS | 1                 |
| SM30z00   | Corrosive aromatics causing toxic effect NOS           | 1                 |
| SLC4.00   | Coronary vasodilator poisoning                         | 1                 |
| SM5y100   | Copper salts causing toxic effect                      | 1                 |
| E230100   | Continuous acute alcoholic intoxication in alcoholism  | 1                 |
| SL22200   | Combined oestrogen and progesterone poisoning          | 1                 |
| SLE7100   | Colchicine poisoning                                   | 1                 |
| SL50300   | Codeine (methyldorphine) poisoning                     | 1                 |
| SL85000   | Cocaine poisoning                                      | 1                 |
| SLC6000   | Clonidine poisoning                                    | 1                 |
| SM56.00   | Chromium causing toxic effect                          | 1                 |
| SLB0z00   | Cholinergic poisoning NOS                              | 1                 |
| SLB0.11   | Cholinergic poisoning                                  | 1                 |
| SL91000   | Chlorpromazine poisoning                               | 1                 |
| SL30000   | Chlorphenamine poisoning                               | 1                 |
| SL14000   | Chloroquine poisoning                                  | 1                 |
| SM75100   | Chloroacetophenone causing toxic effect                | 1                 |
| SM76.00   | Chlorine gas causing toxic effect                      | 1                 |
| SM92.00   | Chlorinated hydrocarbon causing toxic effect           | 1                 |
| SL94000   | Chlordiazepoxide poisoning                             | 1                 |
| SL02000   | Chloramphenicol poisoning                              | 1                 |
| SL31200   | Chlorambucil poisoning                                 | 1                 |
| SL71.00   | Chloral hydrate poisoning                              | 1                 |
| SL13000   | Chiniofon poisoning                                    | 1                 |
| SLH2.11   | Chelating agent poisoning                              | 1                 |
| SLAz.00   | Central nervous system stimulant poisoning NOS         | 1                 |

| Read code | Description                                                  | Number of studies |
|-----------|--------------------------------------------------------------|-------------------|
| SLA..00   | Central nervous system stimulant poisoning                   | 1                 |
| SL80z00   | Central nervous system muscle-tone depressant poisoning NOS  | 1                 |
| SL80.00   | Central nervous system muscle-tone depressant poisoning      | 1                 |
| SL8..00   | Central nervous system depressants and anaesthetic poisoning | 1                 |
| SLH0000   | Central appetite depressant poisoning                        | 1                 |
| SL05000   | Cefalexin poisoning                                          | 1                 |
| SM32z00   | Caustic alkalis causing toxic effect NOS                     | 1                 |
| SM32.00   | Caustic alkalis causing toxic effect                         | 1                 |
| Tz...00   | Causes of injury and poisoning NOS                           | 1                 |
| T....00   | Causes of injury and poisoning                               | 1                 |
| T8...11   | Cause of overdose - accidental                               | 1                 |
| SLC..00   | Cardiovascular drug poisoning                                | 1                 |
| SLCz.00   | Cardiovascular agent poisoning NOS                           | 1                 |
| SLC0.00   | Cardiac rhythm drug poisoning                                | 1                 |
| SLC1.00   | Cardiac glycoside poisoning                                  | 1                 |
| SM21.00   | Carbon tetrachloride causing toxic effect                    | 1                 |
| SM6..00   | Carbon monoxide causing toxic effect                         | 1                 |
| SM93000   | Carbaryl causing toxic effect                                | 1                 |
| SL80000   | Carbamate poisoning                                          | 1                 |
| SLB1400   | Caramiphen poisoning                                         | 1                 |
| SL96000   | Cannabis poisoning                                           | 1                 |
| SL97100   | Caffeine poisoning                                           | 1                 |
| SM55.00   | Cadmium causing toxic effect                                 | 1                 |
| SM70000   | Butane causing toxic effect                                  | 1                 |
| SL70200   | Butabarbitalone poisoning                                    | 1                 |
| SL31100   | Busulfan poisoning                                           | 1                 |
| SL07200   | Bleomycin poisoning                                          | 1                 |
| SL...11   | Biological substance poisoning                               | 1                 |
| SL23100   | Biguanide poisoning                                          | 1                 |
| SLC0400   | Beta blocker poisoning                                       | 1                 |
| SM53.00   | Beryllium causing toxic effect                               | 1                 |
| SM82.00   | Berries and other plants causing toxic effect                | 1                 |
| SM82.11   | Berries - toxic effect                                       | 1                 |
| SLE3000   | Benzothiazide poisoning                                      | 1                 |
| SL94z00   | Benzodiazepine poisoning NOS                                 | 1                 |
| SL94.00   | Benzodiazepine poisoning                                     | 1                 |
| SM20.00   | Benzene causing toxic effect                                 | 1                 |
| SL70z00   | Barbiturate poisoning NOS                                    | 1                 |
| SL70.00   | Barbiturate poisoning                                        | 1                 |
| SL70100   | Barbitone poisoning                                          | 1                 |
| SL31000   | Azathioprine poisoning                                       | 1                 |
| SLB..00   | Autonomic nervous system drug poisoning                      | 1                 |
| SLB1000   | Atropine poisoning                                           | 1                 |
| 1BD8.00   | At risk of DSH - deliberate self harm                        | 1                 |
| TL22.00   | Assault by poisoning by other gases or vapours               | 1                 |
| TL20.00   | Assault by poisoning by drugs or medicines                   | 1                 |
| TL2z.00   | Assault by poisoning NOS                                     | 1                 |
| TL2..00   | Assault by poisoning                                         | 1                 |
| SL51000   | Aspirin poisoning                                            | 1                 |
| SL11.00   | Arsenical anti-infective poisoning                           | 1                 |
| SM51.00   | Arsenic causing toxic effect                                 | 1                 |
| SL52z00   | Aromatic analgesic poisoning NOS                             | 1                 |
| SL52.00   | Aromatic analgesic poisoning NEC                             | 1                 |

1  
2  
3  
4  
5  
6  
7  
8  
9  
10  
11  
12  
13  
14  
15  
16  
17  
18  
19  
20  
21  
22  
23  
24  
25  
26  
27  
28  
29  
30  
31  
32  
33  
34  
35  
36  
37  
38  
39  
40  
41  
42  
43  
44  
45  
46  
47  
48  
49  
50  
51  
52  
53  
54  
55  
56  
57  
58  
59  
60

| Read code | Description                                             | Number of studies |
|-----------|---------------------------------------------------------|-------------------|
| SLF4z00   | Antitussive poisoning NOS                               | 1                 |
| SL28.00   | Antithyroid agent poisoning                             | 1                 |
| SL54z00   | Antirheumatic poisoning NOS                             | 1                 |
| SL54.00   | Antirheumatic poisoning                                 | 1                 |
| SL5y200   | Antipyretic poisoning, NEC                              | 1                 |
| SL5..12   | Antipyretic poisoning                                   | 1                 |
| SL6y.00   | Antiparkinsonism drug poisoning                         | 1                 |
| SL6yz00   | Antiparkinsonian drug poisoning NOS                     | 1                 |
| SL31z00   | Antineoplastic or immunosuppressive poisoning NOS       | 1                 |
| SL07.00   | Antineoplastic antibiotic poisoning                     | 1                 |
| SL31.00   | Antineoplastic and immunosuppressive poisoning          | 1                 |
| SL14z00   | Antimalarial drug poisoning NOS                         | 1                 |
| SL14.00   | Antimalarial drug poisoning                             | 1                 |
| SLC2.00   | Antilipaemic and antiarteriosclerotic poisoning         | 1                 |
| SL30.13   | Antihistamine poisoning                                 | 1                 |
| SL01.00   | Antifungal antibiotic poisoning                         | 1                 |
| SL30.12   | Antiemetic poisoning                                    | 1                 |
| SLD5z00   | Antidiarrhoeal poisoning NOS                            | 1                 |
| SLD5.00   | Antidiarrhoeal poisoning                                | 1                 |
| SL6xz00   | Anticonvulsant poisoning NOS                            | 1                 |
| SL6..11   | Anticonvulsant poisoning                                | 1                 |
| SL6z.00   | Anticonvulsant or antiparkinsonian drug poisoning NOS   | 1                 |
| SL6..00   | Anticonvulsant and antiParkinsonian drug poisoning      | 1                 |
| SL42z00   | Anticoagulant poisoning NOS                             | 1                 |
| SL42.00   | Anticoagulant poisoning                                 | 1                 |
| SL45z00   | Anticoagulant agonist poisoning NOS                     | 1                 |
| SL45.00   | Anticoagulant agonist poisoning                         | 1                 |
| SLB0100   | Anticholinesterase poisoning                            | 1                 |
| SL0z.00   | Antibiotic poisoning NOS                                | 1                 |
| SL0..00   | Antibiotic poisoning                                    | 1                 |
| SLF7z00   | Antiasthmatic poisoning NOS                             | 1                 |
| SL30.00   | Antiallergic and antiemetic drug poisoning              | 1                 |
| SL1z.00   | Anti-infective poisoning NOS                            | 1                 |
| SLD0.00   | Anti-gastric acid drug poisoning                        | 1                 |
| SLF6.00   | Anti-common cold drug poisoning                         | 1                 |
| SL16.00   | Anthelmintic drug poisoning                             | 1                 |
| SL24.00   | Anterior pituitary hormone poisoning                    | 1                 |
| SLD0z00   | Antacid drug poisoning NOS                              | 1                 |
| SLD0.11   | Antacid drug poisoning                                  | 1                 |
| SL21.12   | Androgen poisoning                                      | 1                 |
| SL21z00   | Androgen or anabolic poisoning NOS                      | 1                 |
| SL21.00   | Androgen and anabolic poisoning                         | 1                 |
| SL5z.00   | Analgesic, antipyretic or antirheumatic poisoning NOS   | 1                 |
| SL5..00   | Analgesic, antipyretic and antirheumatic drug poisoning | 1                 |
| SL5y100   | Analgesic poisoning, NEC                                | 1                 |
| SL5..11   | Analgesic poisoning                                     | 1                 |
| SLA0.00   | Analeptic poisoning                                     | 1                 |
| SL8..11   | Anaesthetic poisoning                                   | 1                 |
| SL21.11   | Anabolic steroid poisoning                              | 1                 |
| SM03000   | Amyl alcohol causing toxic effect                       | 1                 |
| SL00000   | Ampicillin poisoning                                    | 1                 |
| SL01000   | Amphotericin B poisoning                                | 1                 |
| SL70000   | Amobarbital poisoning                                   | 1                 |

| Read code | Description                                                  | Number of studies |
|-----------|--------------------------------------------------------------|-------------------|
| SL90000   | Amitriptyline poisoning                                      | 1                 |
| SLF7000   | Aminophylline poisoning                                      | 1                 |
| SL97000   | Amphetamine poisoning                                        | 1                 |
| SL6y000   | Amantadine poisoning                                         | 1                 |
| SLD0000   | Aluminium hydroxide poisoning                                | 1                 |
| SLE7000   | Allopurinol poisoning                                        | 1                 |
| SLH3.00   | Alcohol deterrent poisoning                                  | 1                 |
| E230.11   | Alcohol dependence with acute alcoholic intoxication         | 1                 |
| SM0z.00   | Alcohol causing toxic effect NOS                             | 1                 |
| SM0..00   | Alcohol causing toxic effect                                 | 1                 |
| SL4..00   | Agents affecting blood constituents, causing poisoning       | 1                 |
| TJF5100   | Adverse reaction to ipecacuanha                              | 1                 |
| TJF5000   | Adverse reaction to acetylcysteine                           | 1                 |
| SLC8000   | Adrenochrome poisoning                                       | 1                 |
| SLB2.11   | Adrenergic poisoning                                         | 1                 |
| SL20z00   | Adrenal cortico-steroid poisoning NOS                        | 1                 |
| SL20.00   | Adrenal cortico-steroid poisoning                            | 1                 |
| 761H300   | Administration of activated charcoal                         | 1                 |
| E230000   | Acute alcoholic intoxication, unspecified, in alcoholism     | 1                 |
| E230z00   | Acute alcoholic intoxication in alcoholism NOS               | 1                 |
| E230.00   | Acute alcoholic intoxication in alcoholism                   | 1                 |
| SM31z00   | Acids causing toxic effect NOS                               | 1                 |
| SM31.00   | Acids causing toxic effect                                   | 1                 |
| SL32.00   | Acidifying agent poisoning                                   | 1                 |
| SLB0000   | Acetylcholine poisoning                                      | 1                 |
| SM2y000   | Acetone causing toxic effect                                 | 1                 |
| SL23000   | Acetohexamide poisoning                                      | 1                 |
| SLE2000   | Acetazolamide poisoning                                      | 1                 |
| T80yz00   | Accidental poisoning-oth analgesic,antipyretic,antirheum NOS | 1                 |
| T830z00   | Accidental poisoning- phenothiazine-based tranquillisers NOS | 1                 |
| T832z00   | Accidental poisoning- benzodiazepine-based tranquilliser NOS | 1                 |
| T953100   | Accidental poisoning from seeds                              | 1                 |
| T954.00   | Accidental poisoning from other plants                       | 1                 |
| T955y00   | Accidental poisoning from other fungi                        | 1                 |
| T955.00   | Accidental poisoning from mushrooms and other fungi          | 1                 |
| T955z00   | Accidental poisoning from mushrooms and fungi NOS            | 1                 |
| T955000   | Accidental poisoning from mushrooms                          | 1                 |
| T95..00   | Accidental poisoning from foodstuffs and poisonous plants    | 1                 |
| T953z00   | Accidental poisoning from berries or seeds NOS               | 1                 |
| T953.00   | Accidental poisoning from berries and seeds                  | 1                 |
| T953000   | Accidental poisoning from berries                            | 1                 |
| T937400   | Accidental poisoning by zinc phosphide                       | 1                 |
| T916300   | Accidental poisoning by white washes                         | 1                 |
| T885.00   | Accidental poisoning by water,mineral,uric acid metab drugs  | 1                 |
| T937300   | Accidental poisoning by warfarin                             | 1                 |
| T981z00   | Accidental poisoning by utility gas NOS                      | 1                 |
| T88z.00   | Accidental poisoning by unspecified drugs                    | 1                 |
| T83z.00   | Accidental poisoning by tranquillisers NOS                   | 1                 |
| T83..00   | Accidental poisoning by tranquillisers                       | 1                 |
| T930500   | Accidental poisoning by toxaphene                            | 1                 |
| T964700   | Accidental poisoning by thallium compounds                   | 1                 |
| T937200   | Accidental poisoning by thallium                             | 1                 |
| T993.00   | Accidental poisoning by tear gas                             | 1                 |

1  
2  
3  
4  
5  
6  
7  
8  
9  
10  
11  
12  
13  
14  
15  
16  
17  
18  
19  
20  
21  
22  
23  
24  
25  
26  
27  
28  
29  
30  
31  
32  
33  
34  
35  
36  
37  
38  
39  
40  
41  
42  
43  
44  
45  
46  
47  
48  
49  
50  
51  
52  
53  
54  
55  
56  
57  
58  
59  
60

| Read code | Description                                                | Number of studies |
|-----------|------------------------------------------------------------|-------------------|
| T910.00   | Accidental poisoning by synthetic detergents and shampoos  | 1                 |
| T941200   | Accidental poisoning by sulphuric acid                     | 1                 |
| T991.00   | Accidental poisoning by sulphur dioxide                    | 1                 |
| T937100   | Accidental poisoning by squill and derivatives             | 1                 |
| T92z.00   | Accidental poisoning by solvent NOS                        | 1                 |
| T96z.00   | Accidental poisoning by solid and liquid substances NOS    | 1                 |
| T942000   | Accidental poisoning by sodium hydroxide                   | 1                 |
| T911.00   | Accidental poisoning by soap products                      | 1                 |
| T887z00   | Accidental poisoning by skin, eye, ENT and dental drug NOS | 1                 |
| T887000   | Accidental poisoning by skin drugs                         | 1                 |
| T82z.00   | Accidental poisoning by sedatives and hypnotics NOS        | 1                 |
| T903300   | Accidental poisoning by secondary propyl alcohol           | 1                 |
| T913000   | Accidental poisoning by scouring agents                    | 1                 |
| T803z00   | Accidental poisoning by salicylates NOS                    | 1                 |
| T803.00   | Accidental poisoning by salicylates                        | 1                 |
| T937z00   | Accidental poisoning by rodenticides NOS                   | 1                 |
| T937.00   | Accidental poisoning by rodenticides                       | 1                 |
| T815.00   | Accidental poisoning by quinalbarbitone                    | 1                 |
| T805.00   | Accidental poisoning by pyrazole derivatives               | 1                 |
| T84z.00   | Accidental poisoning by psychotropic agents NOS            | 1                 |
| T841400   | Accidental poisoning by psilocin                           | 1                 |
| T932200   | Accidental poisoning by propoxur                           | 1                 |
| T980200   | Accidental poisoning by propane                            | 1                 |
| T830300   | Accidental poisoning by promazine                          | 1                 |
| T830200   | Accidental poisoning by prochlorperazine                   | 1                 |
| T881.00   | Accidental poisoning by primarily systemic agents          | 1                 |
| T912.00   | Accidental poisoning by polishes                           | 1                 |
| T965z00   | Accidental poisoning by plant foods and fertilisers NOS    | 1                 |
| T965.00   | Accidental poisoning by plant foods and fertilisers        | 1                 |
| T965000   | Accidental poisoning by plant food                         | 1                 |
| T973.00   | Accidental poisoning by piped natural gas                  | 1                 |
| T938200   | Accidental poisoning by phosphine                          | 1                 |
| T805100   | Accidental poisoning by phenylbutazone                     | 1                 |
| T830.00   | Accidental poisoning by phenothiazine-based tranquillisers | 1                 |
| T940011   | Accidental poisoning by phenol                             | 1                 |
| T814.00   | Accidental poisoning by phenobarbitone                     | 1                 |
| T804200   | Accidental poisoning by phenacetin                         | 1                 |
| T920.00   | Accidental poisoning by petroleum solvents                 | 1                 |
| T923.00   | Accidental poisoning by petroleum solids                   | 1                 |
| T920200   | Accidental poisoning by petroleum naphtha                  | 1                 |
| T921.12   | Accidental poisoning by petroleum fuels                    | 1                 |
| T920z00   | Accidental poisoning by petrol solvents NOS                | 1                 |
| T923z00   | Accidental poisoning by petrol solids NOS                  | 1                 |
| T92..00   | Accidental poisoning by petrol products                    | 1                 |
| T921.00   | Accidental poisoning by petrol fuels and cleaners          | 1                 |
| T921z00   | Accidental poisoning by petrol fuel or cleaner NOS         | 1                 |
| T921200   | Accidental poisoning by petrol                             | 1                 |
| T802100   | Accidental poisoning by pethidine                          | 1                 |
| T813.00   | Accidental poisoning by pentobarbitone                     | 1                 |
| T80y000   | Accidental poisoning by pentazocine                        | 1                 |
| T935500   | Accidental poisoning by paraquat                           | 1                 |
| T923000   | Accidental poisoning by paraffin wax                       | 1                 |
| T804100   | Accidental poisoning by paracetamol                        | 1                 |

| Read code | Description                                                  | Number of studies |
|-----------|--------------------------------------------------------------|-------------------|
| T916z00   | Accidental poisoning by paint or varnish NOS                 | 1                 |
| T887300   | Accidental poisoning by otorhinolaryngological drugs         | 1                 |
| T98..00   | Accidental poisoning by other utility gas + carbon monoxide  | 1                 |
| T981.00   | Accidental poisoning by other utility gas                    | 1                 |
| T83yz00   | Accidental poisoning by other tranquilisers NOS              | 1                 |
| T83y.00   | Accidental poisoning by other tranquilisers                  | 1                 |
| T924z00   | Accidental poisoning by other solvents NOS                   | 1                 |
| T924.00   | Accidental poisoning by other solvents                       | 1                 |
| T96y.00   | Accidental poisoning by other solid and liquid substances OS | 1                 |
| T96..00   | Accidental poisoning by other solid and liquid substances    | 1                 |
| T82y.00   | Accidental poisoning by other sedatives and hypnotics OS     | 1                 |
| T82..00   | Accidental poisoning by other sedatives and hypnotics        | 1                 |
| T84..00   | Accidental poisoning by other psychotropic agents            | 1                 |
| T916.00   | Accidental poisoning by other paints and varnishes           | 1                 |
| T802z00   | Accidental poisoning by other opiates NOS                    | 1                 |
| T802.00   | Accidental poisoning by other opiates                        | 1                 |
| T807.00   | Accidental poisoning by other non-narcotic analgesics        | 1                 |
| T9...00   | Accidental poisoning by other non-drug substances            | 1                 |
| T964.00   | Accidental poisoning by other metals + compounds and fumes   | 1                 |
| T934.00   | Accidental poisoning by other insecticides                   | 1                 |
| T99y.00   | Accidental poisoning by other gases and vapours OS           | 1                 |
| T99yz00   | Accidental poisoning by other gases and vapours NOS          | 1                 |
| T99..00   | Accidental poisoning by other gases and vapours              | 1                 |
| T95y.00   | Accidental poisoning by other foods                          | 1                 |
| T901.00   | Accidental poisoning by other ethyl alcohol and its products | 1                 |
| T85..00   | Accidental poisoning by other drugs acting on nervous system | 1                 |
| T88y.00   | Accidental poisoning by other drugs OS                       | 1                 |
| T88yz00   | Accidental poisoning by other drugs NOS                      | 1                 |
| T88..00   | Accidental poisoning by other drugs                          | 1                 |
| T94y.00   | Accidental poisoning by other corrosives and caustics        | 1                 |
| T913z00   | Accidental poisoning by other cleaning agents NOS            | 1                 |
| T913.00   | Accidental poisoning by other cleaning agents                | 1                 |
| T90y.00   | Accidental poisoning by other alcohols                       | 1                 |
| T966y00   | Accidental poisoning by other adhesives                      | 1                 |
| T851.00   | Accidental poisoning by oth central nervous syst depressants | 1                 |
| T80y.00   | Accidental poisoning by oth analgesics,antipyretic,antirheum | 1                 |
| T931z00   | Accidental poisoning by organophosphorus insecticides NOS    | 1                 |
| T931.00   | Accidental poisoning by organophosphorus insecticides        | 1                 |
| T930.00   | Accidental poisoning by organochlorine insecticides          | 1                 |
| T936000   | Accidental poisoning by organic mercurials                   | 1                 |
| T802300   | Accidental poisoning by opium                                | 1                 |
| T843100   | Accidental poisoning by opiate antagonists                   | 1                 |
| T887200   | Accidental poisoning by ophthalmological drugs               | 1                 |
| T855100   | Accidental poisoning by noradrenalin                         | 1                 |
| T807z00   | Accidental poisoning by non-narcotic analgesics NOS          | 1                 |
| T916200   | Accidental poisoning by non-lead paints                      | 1                 |
| T990.00   | Accidental poisoning by nitrogen oxides                      | 1                 |
| T941100   | Accidental poisoning by nitric acid                          | 1                 |
| T832500   | Accidental poisoning by nitrazepam                           | 1                 |
| T964600   | Accidental poisoning by nickel compounds                     | 1                 |
| T806200   | Accidental poisoning by naproxen                             | 1                 |
| T886.00   | Accidental poisoning by muscle + respiratory system drugs    | 1                 |
| T887100   | Accidental poisoning by mucous membrane drugs                | 1                 |



1  
2  
3  
4  
5  
6  
7  
8  
9  
10  
11  
12  
13  
14  
15  
16  
17  
18  
19  
20  
21  
22  
23  
24  
25  
26  
27  
28  
29  
30  
31  
32  
33  
34  
35  
36  
37  
38  
39  
40  
41  
42  
43  
44  
45  
46  
47  
48  
49  
50  
51  
52  
53  
54  
55  
56  
57  
58  
59  
60

| Read code | Description                                                 | Number of studies |
|-----------|-------------------------------------------------------------|-------------------|
| T982.00   | Accidental poisoning by motor vehicle exhaust gas           | 1                 |
| T802200   | Accidental poisoning by morphine                            | 1                 |
| T840200   | Accidental poisoning by monoamine oxidase inhibitors        | 1                 |
| T933.00   | Accidental poisoning by mixtures of insecticides            | 1                 |
| T935400   | Accidental poisoning by mixtures herbicides+plant food etc  | 1                 |
| T825.00   | Accidental poisoning by mixed sedatives NEC                 | 1                 |
| T901100   | Accidental poisoning by methylated spirit                   | 1                 |
| T938100   | Accidental poisoning by methyl bromide                      | 1                 |
| T902.00   | Accidental poisoning by methyl alcohol                      | 1                 |
| T823.00   | Accidental poisoning by methaqualone compounds              | 1                 |
| T902000   | Accidental poisoning by methanol                            | 1                 |
| T801.00   | Accidental poisoning by methadone                           | 1                 |
| T964z00   | Accidental poisoning by metals + compounds and fumes NOS    | 1                 |
| T961000   | Accidental poisoning by mercury, unspecified                | 1                 |
| T961z00   | Accidental poisoning by mercury, NOS                        | 1                 |
| T961200   | Accidental poisoning by mercury fumes                       | 1                 |
| T961.00   | Accidental poisoning by mercury and its compounds and fumes | 1                 |
| T832400   | Accidental poisoning by medazepam                           | 1                 |
| T964500   | Accidental poisoning by manganese and its compounds         | 1                 |
| T931300   | Accidental poisoning by malathion                           | 1                 |
| T841100   | Accidental poisoning by lysergide, LSD                      | 1                 |
| T922.00   | Accidental poisoning by lubricating oils                    | 1                 |
| T832300   | Accidental poisoning by lorazepam                           | 1                 |
| T852.00   | Accidental poisoning by local anaesthetic                   | 1                 |
| T852100   | Accidental poisoning by lignocaine                          | 1                 |
| T960000   | Accidental poisoning by lead, unspecified                   | 1                 |
| T960z00   | Accidental poisoning by lead, NOS                           | 1                 |
| T915.00   | Accidental poisoning by lead paints                         | 1                 |
| T960.00   | Accidental poisoning by lead and its compounds and fumes    | 1                 |
| T916000   | Accidental poisoning by lacquers                            | 1                 |
| T806400   | Accidental poisoning by ketoprofen                          | 1                 |
| T921300   | Accidental poisoning by kerosene                            | 1                 |
| T903z00   | Accidental poisoning by isopropyl alcohol NOS               | 1                 |
| T903100   | Accidental poisoning by isopropanol                         | 1                 |
| T964400   | Accidental poisoning by iron compounds                      | 1                 |
| T934z00   | Accidental poisoning by insecticides NOS                    | 1                 |
| T806100   | Accidental poisoning by indomethacin                        | 1                 |
| T840100   | Accidental poisoning by imipramine                          | 1                 |
| T806300   | Accidental poisoning by ibuprofen                           | 1                 |
| T854200   | Accidental poisoning by hyoscine                            | 1                 |
| T941000   | Accidental poisoning by hydrochloric acid                   | 1                 |
| T850100   | Accidental poisoning by hydantoin derivatives               | 1                 |
| T91z.00   | Accidental poisoning by household agents NOS                | 1                 |
| T91..00   | Accidental poisoning by household agents                    | 1                 |
| T880.00   | Accidental poisoning by hormones and synthetic substitutes  | 1                 |
| T800.00   | Accidental poisoning by heroin                              | 1                 |
| T935z00   | Accidental poisoning by herbicides NOS                      | 1                 |
| T935.00   | Accidental poisoning by herbicides                          | 1                 |
| T981300   | Accidental poisoning by heating gas NOS                     | 1                 |
| T831000   | Accidental poisoning by haloperidol                         | 1                 |
| T851200   | Accidental poisoning by halogenated hydrocarbon derivatives | 1                 |
| T841.00   | Accidental poisoning by hallucinogens                       | 1                 |
| T841z00   | Accidental poisoning by hallucinogen NOS                    | 1                 |

| Read code | Description                                                 | Number of studies |
|-----------|-------------------------------------------------------------|-------------------|
| T806000   | Accidental poisoning by gold salts                          | 1                 |
| T966z00   | Accidental poisoning by glues and adhesives NOS             | 1                 |
| T966.00   | Accidental poisoning by glues and adhesives                 | 1                 |
| T966000   | Accidental poisoning by glues                               | 1                 |
| T884.00   | Accidental poisoning by gastrointestinal system drugs       | 1                 |
| T470.00   | Accidental poisoning by gases or fumes on ship              | 1                 |
| T99z.00   | Accidental poisoning by gases and vapours NOS               | 1                 |
| T921100   | Accidental poisoning by gas oils                            | 1                 |
| T97..00   | Accidental poisoning by gas distributed by pipeline         | 1                 |
| T936z00   | Accidental poisoning by fungicides NOS                      | 1                 |
| T936.00   | Accidental poisoning by fungicides                          | 1                 |
| T938.00   | Accidental poisoning by fumigants                           | 1                 |
| T95z.00   | Accidental poisoning by foodstuffs and poisonous plants NOS | 1                 |
| T965100   | Accidental poisoning by fertilisers                         | 1                 |
| T982000   | Accidental poisoning by exhaust gas-stationary farm tractor | 1                 |
| T982z00   | Accidental poisoning by exhaust gas from motor vehicle NOS  | 1                 |
| T982100   | Accidental poisoning by exhaust gas from gas engine         | 1                 |
| T901z00   | Accidental poisoning by ethyl alcohol NOS                   | 1                 |
| T901300   | Accidental poisoning by ethanol, NOS                        | 1                 |
| T8...00   | Accidental poisoning by drugs, medicines and biologicals    | 1                 |
| T882.00   | Accidental poisoning by drugs affecting blood constituents  | 1                 |
| T85z.00   | Accidental poisoning by drugs acting on nervous system NOS  | 1                 |
| T8z..00   | Accidental poisoning by drugs NOS                           | 1                 |
| T914.00   | Accidental poisoning by disinfectants                       | 1                 |
| T935300   | Accidental poisoning by diquat                              | 1                 |
| T930300   | Accidental poisoning by dieldrin                            | 1                 |
| T832100   | Accidental poisoning by diazepam                            | 1                 |
| T800.11   | Accidental poisoning by diamorphine                         | 1                 |
| T887400   | Accidental poisoning by dental drugs                        | 1                 |
| T901000   | Accidental poisoning by denatured alcohol                   | 1                 |
| T938000   | Accidental poisoning by cyanides                            | 1                 |
| T967.00   | Accidental poisoning by cosmetics                           | 1                 |
| T94z.00   | Accidental poisoning by corrosives and caustics NOS         | 1                 |
| T94..00   | Accidental poisoning by corrosives and caustics NEC         | 1                 |
| T940.00   | Accidental poisoning by corrosive aromatics                 | 1                 |
| T964300   | Accidental poisoning by copper salts                        | 1                 |
| T981400   | Accidental poisoning by cooking gas NOS                     | 1                 |
| T802000   | Accidental poisoning by codeine                             | 1                 |
| T852000   | Accidental poisoning by cocaine                             | 1                 |
| T971.00   | Accidental poisoning by coal gas NOS                        | 1                 |
| T853.00   | Accidental poisoning by cholinergics                        | 1                 |
| T830000   | Accidental poisoning by chlorpromazine                      | 1                 |
| T99y000   | Accidental poisoning by chlorine                            | 1                 |
| T832000   | Accidental poisoning by chlordiazepoxide                    | 1                 |
| T930100   | Accidental poisoning by chlordane                           | 1                 |
| T935200   | Accidental poisoning by chlorates                           | 1                 |
| T820.00   | Accidental poisoning by chloral hydrate                     | 1                 |
| T88y000   | Accidental poisoning by central appetite depressants        | 1                 |
| T942z00   | Accidental poisoning by caustic alkalis NOS                 | 1                 |
| T942.00   | Accidental poisoning by caustic alkalis                     | 1                 |
| T883.00   | Accidental poisoning by cardiovascular system drugs         | 1                 |
| T983.00   | Accidental poisoning by carbon monoxide-other domestic fuel | 1                 |
| T970.00   | Accidental poisoning by carbon monoxide from piped gas      | 1                 |

1  
2  
3  
4  
5  
6  
7  
8  
9  
10  
11  
12  
13  
14  
15  
16  
17  
18  
19  
20  
21  
22  
23  
24  
25  
26  
27  
28  
29  
30  
31  
32  
33  
34  
35  
36  
37  
38  
39  
40  
41  
42  
43  
44  
45  
46  
47  
48  
49  
50  
51  
52  
53  
54  
55  
56  
57  
58  
59  
60

| Read code | Description                                                  | Number of studies |
|-----------|--------------------------------------------------------------|-------------------|
| T98y.00   | Accidental poisoning by carbon monoxide from other sources   | 1                 |
| T98yz00   | Accidental poisoning by carbon monoxide from oth source NOS  | 1                 |
| T98z.00   | Accidental poisoning by carbon monoxide NOS                  | 1                 |
| T983z00   | Accidental poisoning by carbon monoxide - domestic fuel NOS  | 1                 |
| T940000   | Accidental poisoning by carbolic acid                        | 1                 |
| T932100   | Accidental poisoning by carbaryl                             | 1                 |
| T932.00   | Accidental poisoning by carbamates                           | 1                 |
| T841000   | Accidental poisoning by cannabis derivatives                 | 1                 |
| T842100   | Accidental poisoning by caffeine                             | 1                 |
| T964200   | Accidental poisoning by cadmium and its compounds            | 1                 |
| T980100   | Accidental poisoning by butane                               | 1                 |
| T993000   | Accidental poisoning by bromobenzyl cyanide                  | 1                 |
| T822.00   | Accidental poisoning by bromine compounds                    | 1                 |
| T822000   | Accidental poisoning by bromides                             | 1                 |
| T964100   | Accidental poisoning by brass fumes                          | 1                 |
| T964000   | Accidental poisoning by beryllium and its compounds          | 1                 |
| T832.00   | Accidental poisoning by benzodiazepine-based tranquillisers  | 1                 |
| T930000   | Accidental poisoning by benzene hexachlorine                 | 1                 |
| T924000   | Accidental poisoning by benzene                              | 1                 |
| T81z.00   | Accidental poisoning by barbiturates NOS                     | 1                 |
| T81..00   | Accidental poisoning by barbiturates                         | 1                 |
| T811.00   | Accidental poisoning by barbitone                            | 1                 |
| T854000   | Accidental poisoning by atropine                             | 1                 |
| T803000   | Accidental poisoning by aspirin                              | 1                 |
| T963000   | Accidental poisoning by arsenic, unspecified                 | 1                 |
| T963100   | Accidental poisoning by arsenic compounds                    | 1                 |
| T963.00   | Accidental poisoning by arsenic and its compounds and fumes  | 1                 |
| T804.00   | Accidental poisoning by aromatic analgesics NEC              | 1                 |
| T806z00   | Accidental poisoning by antirheumatics NOS                   | 1                 |
| T806.00   | Accidental poisoning by antirheumatics                       | 1                 |
| T840z00   | Accidental poisoning by antidepressants NOS                  | 1                 |
| T840.00   | Accidental poisoning by antidepressants                      | 1                 |
| T850z00   | Accidental poisoning by anticonvulsant/anti-parkin drug NOS  | 1                 |
| T850.00   | Accidental poisoning by anticonvulsant + anti-parkinson drug | 1                 |
| T850.11   | Accidental poisoning by anticonvulsant                       | 1                 |
| T854.00   | Accidental poisoning by anticholinergics                     | 1                 |
| T86..00   | Accidental poisoning by antibiotics                          | 1                 |
| T850.12   | Accidental poisoning by anti-parkinsonism drug               | 1                 |
| T87..00   | Accidental poisoning by anti-infectives                      | 1                 |
| T80..00   | Accidental poisoning by analgesics,antipyretic,antirheumatic | 1                 |
| T80z.00   | Accidental poisoning by analgesics,antipyretic,antirheum NOS | 1                 |
| T842000   | Accidental poisoning by amphetamine                          | 1                 |
| T840000   | Accidental poisoning by amitriptyline                        | 1                 |
| T900.00   | Accidental poisoning by alcoholic beverages                  | 1                 |
| T90..00   | Accidental poisoning by alcohol, NEC                         | 1                 |
| T90z.00   | Accidental poisoning by alcohol NOS                          | 1                 |
| T93..00   | Accidental poisoning by agricultural chemical preparations   | 1                 |
| T855.00   | Accidental poisoning by adrenergics                          | 1                 |
| T855000   | Accidental poisoning by adrenalin                            | 1                 |
| T941z00   | Accidental poisoning by acids NOS                            | 1                 |
| T941.00   | Accidental poisoning by acids                                | 1                 |
| T981000   | Accidental poisoning by acetylene                            | 1                 |
| T930200   | Accidental poisoning by DDT                                  | 1                 |

| Read code | Description                                                  | Number of studies |
|-----------|--------------------------------------------------------------|-------------------|
| T983300   | Accidental poisoning by CO- kerosene in domestic stove/fire  | 1                 |
| T983100   | Accidental poisoning by CO- coke in domestic stove/fireplace | 1                 |
| T983000   | Accidental poisoning by CO- coal in domestic stove/fireplace | 1                 |
| T98y100   | Accidental poisoning by CO - kiln vapour                     | 1                 |
| T98y200   | Accidental poisoning by CO - fuels in industrial use         | 1                 |
| T98y000   | Accidental poisoning by CO - blast furnace gas               | 1                 |
| T93z.00   | Accidental poisoning agricultural chemical preparations NOS  | 1                 |
| T9z..00   | Accidental poisoning NOS                                     | 1                 |
| T77z.00   | Accident/poisoning occurred in residential institution NOS   | 1                 |
| T85y.00   | Accid. poisoning by other drugs acting on nervous system OS  | 1                 |
| T470500   | Accid poison gas/fume on ship - swimmer injured              | 1                 |
| SL24011   | ACTH - adrenocorticotrophic hormone poisoning                | 1                 |

**Appendix 20. ICD codes used in the studies of anxiety.**

| <b>Study</b> | <b>Databases</b> | <b>ICD version</b> | <b>List of codes</b> |
|--------------|------------------|--------------------|----------------------|
| Bouras, 2016 | CPRD + HES       | ICD-10             | F40-F48              |

CPRD – Clinical Practice Research Datalink; HES – Hospital Episode Statistics; ICD - International Classification of Diseases.

For peer review only

**Appendix 21. ICD codes used in the studies of depression.**

| <b>Study</b>        | <b>Databases</b> | <b>ICD version</b> | <b>List of codes</b>   |
|---------------------|------------------|--------------------|------------------------|
| Bouras, 2016        | CPRD + HES       | ICD-10             | F32, F33               |
| Jenkins-Jones, 2018 | CPRD + HES       | ICD-10             | F32, F33, F41.2, F92.0 |

CPRD – Clinical Practice Research Datalink; HES – Hospital Episode Statistics; ICD - International Classification of Diseases.

For peer review only

**Appendix 22. ICD codes used in the studies of dementia.**

| <b>Study</b> | <b>Databases</b> | <b>ICD version</b> | <b>List of codes</b>                               |
|--------------|------------------|--------------------|----------------------------------------------------|
| Brown, 2016  | CPRD + HES       | ICD-10             | E512, F00, F01, F02, F03, F10.6, F10.7, G30, G31.0 |
| Emdin, 2016  | CPRD + HES       | ICD-10             | F01                                                |

CPRD – Clinical Practice Research Datalink; HES – Hospital Episode Statistics; ICD - International Classification of Diseases.

For peer review only

1  
2  
3 **Appendix 23. ICD codes used in the studies of fatal self-harm.**  
4  
5  
6

7

| Study            | ICD version | List of codes                                      |
|------------------|-------------|----------------------------------------------------|
| Carr, 2017       | ICD-10      | V01-Y98                                            |
| Coupland, 2015   | ICD-10      | not provided                                       |
| Doyle, 2016      | ICD-10      | X60-X84, Y10-34 (excluding Y33.9), Y87.0 and Y87.2 |
| Lalmohamed, 2012 | ICD-10      | V01-Y99                                            |
| Meier, 2004      | ICD-10      | not provided                                       |
| Schuerch, 2016   | ICD-10      | X60-X84, Y10-Y34                                   |
| Thomas, 2013     | ICD-10      | X60-X84, Y10-34 (excluding Y33.9)                  |
| Webb, 2012       | ICD-10      | X60-X84, Y10-34 (excluding Y33.9)                  |
| Windfuhr, 2016   | ICD-10      | X60-X84, Y10-34 (excluding Y33.9), Y87.0 and Y87.2 |

23 ICD - International Classification of Diseases  
24  
25  
26  
27  
28  
29  
30  
31  
32  
33  
34  
35  
36  
37  
38  
39  
40  
41  
42  
43  
44  
45  
46  
47  
48  
49  
50  
51  
52  
53  
54  
55  
56  
57  
58  
59  
60



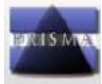

# PRISMA 2009 Checklist

1  
2  
3  
4  
5  
6  
7  
8  
9  
10  
11  
12  
13  
14  
15  
16  
17  
18  
19  
20  
21  
22  
23  
24  
25  
26  
27  
28  
29  
30  
31  
32  
33  
34  
35  
36  
37  
38  
39  
40  
41  
42  
43  
44  
45  
46  
47

| Section/topic                      | #  | Checklist item                                                                                                                                                                                                                                                                                              | Reported on page # |
|------------------------------------|----|-------------------------------------------------------------------------------------------------------------------------------------------------------------------------------------------------------------------------------------------------------------------------------------------------------------|--------------------|
| <b>TITLE</b>                       |    |                                                                                                                                                                                                                                                                                                             |                    |
| Title                              | 1  | Identify the report as a systematic review, meta-analysis, or both.                                                                                                                                                                                                                                         | 1                  |
| <b>ABSTRACT</b>                    |    |                                                                                                                                                                                                                                                                                                             |                    |
| Structured summary                 | 2  | Provide a structured summary including, as applicable: background; objectives; data sources; study eligibility criteria, participants, and interventions; study appraisal and synthesis methods; results; limitations; conclusions and implications of key findings; systematic review registration number. | 2                  |
| <b>INTRODUCTION</b>                |    |                                                                                                                                                                                                                                                                                                             |                    |
| Rationale                          | 3  | Describe the rationale for the review in the context of what is already known.                                                                                                                                                                                                                              | 5                  |
| Objectives                         | 4  | Provide an explicit statement of questions being addressed with reference to participants, interventions, comparisons, outcomes, and study design (PICOS).                                                                                                                                                  | 5                  |
| <b>METHODS</b>                     |    |                                                                                                                                                                                                                                                                                                             |                    |
| Protocol and registration          | 5  | Indicate if a review protocol exists, if and where it can be accessed (e.g., Web address), and, if available, provide registration information including registration number.                                                                                                                               | None exists        |
| Eligibility criteria               | 6  | Specify study characteristics (e.g., PICOS, length of follow-up) and report characteristics (e.g., years considered, language, publication status) used as criteria for eligibility, giving rationale.                                                                                                      | 6-7                |
| Information sources                | 7  | Describe all information sources (e.g., databases with dates of coverage, contact with study authors to identify additional studies) in the search and date last searched.                                                                                                                                  | 6                  |
| Search                             | 8  | Present full electronic search strategy for at least one database, including any limits used, such that it could be repeated.                                                                                                                                                                               | Appendix 1         |
| Study selection                    | 9  | State the process for selecting studies (i.e., screening, eligibility, included in systematic review, and, if applicable, included in the meta-analysis).                                                                                                                                                   | 7                  |
| Data collection process            | 10 | Describe method of data extraction from reports (e.g., piloted forms, independently, in duplicate) and any processes for obtaining and confirming data from investigators.                                                                                                                                  | 7                  |
| Data items                         | 11 | List and define all variables for which data were sought (e.g., PICOS, funding sources) and any assumptions and simplifications made.                                                                                                                                                                       | 7                  |
| Risk of bias in individual studies | 12 | Describe methods used for assessing risk of bias of individual studies (including specification of whether this was done at the study or outcome level), and how this information is to be used in any data synthesis.                                                                                      | Not applicable     |
| Summary measures                   | 13 | State the principal summary measures (e.g., risk ratio, difference in means).                                                                                                                                                                                                                               | Not applicable     |



# PRISMA 2009 Checklist

|                      |    |                                                                                                                                                           |     |
|----------------------|----|-----------------------------------------------------------------------------------------------------------------------------------------------------------|-----|
| Synthesis of results | 14 | Describe the methods of handling data and combining results of studies, if done, including measures of consistency (e.g., $I^2$ ) for each meta-analysis. | 7-8 |
|----------------------|----|-----------------------------------------------------------------------------------------------------------------------------------------------------------|-----|

Page 1 of 2

| Section/topic                                                                                                                              | #  | Checklist item                                                                                                                                                                                           | Reported on page # |
|--------------------------------------------------------------------------------------------------------------------------------------------|----|----------------------------------------------------------------------------------------------------------------------------------------------------------------------------------------------------------|--------------------|
| Risk of bias across studies                                                                                                                | 15 | Specify any assessment of risk of bias that may affect the cumulative evidence (e.g., publication bias, selective reporting within studies).                                                             | Not applicable     |
| Additional analyses                                                                                                                        | 16 | Describe methods of additional analyses (e.g., sensitivity or subgroup analyses, meta-regression), if done, indicating which were pre-specified.                                                         | Not applicable     |
| <b>RESULTS</b>                                                                                                                             |    |                                                                                                                                                                                                          |                    |
| Study selection                                                                                                                            | 17 | Give numbers of studies screened, assessed for eligibility, and included in the review, with reasons for exclusions at each stage, ideally with a flow diagram.                                          | Fig 1              |
| Study characteristics                                                                                                                      | 18 | For each study, present characteristics for which data were extracted (e.g., study size, PICOS, follow-up period) and provide the citations.                                                             | App. 3-10          |
| Risk of bias within studies                                                                                                                | 19 | Present data on risk of bias of each study and, if available, any outcome level assessment (see item 12).                                                                                                | Not applicable     |
| Results of individual studies                                                                                                              | 20 | For all outcomes considered (benefits or harms), present, for each study: (a) simple summary data for each intervention group (b) effect estimates and confidence intervals, ideally with a forest plot. | App. 11-22         |
| Synthesis of results                                                                                                                       | 21 | Present results of each meta-analysis done, including confidence intervals and measures of consistency.                                                                                                  | Not applicable     |
| Risk of bias across studies                                                                                                                | 22 | Present results of any assessment of risk of bias across studies (see Item 15).                                                                                                                          | Not applicable     |
| Additional analysis                                                                                                                        | 23 | Give results of additional analyses, if done (e.g., sensitivity or subgroup analyses, meta-regression [see Item 16]).                                                                                    | Not applicable     |
| <b>DISCUSSION</b>                                                                                                                          |    |                                                                                                                                                                                                          |                    |
| Summary of evidence                                                                                                                        | 24 | Summarize the main findings including the strength of evidence for each main outcome; consider their relevance to key groups (e.g., healthcare providers, users, and policy makers).                     | 14                 |
| Limitations                                                                                                                                | 25 | Discuss limitations at study and outcome level (e.g., risk of bias), and at review-level (e.g., incomplete retrieval of identified research, reporting bias).                                            | 14-15              |
| Conclusions                                                                                                                                | 26 | Provide a general interpretation of the results in the context of other evidence, and implications for future research.                                                                                  | 16-19              |
| <b>FUNDING</b>                                                                                                                             |    |                                                                                                                                                                                                          |                    |
| For peer review only - <a href="http://bmjopen.bmj.com/site/about/guidelines.xhtml">http://bmjopen.bmj.com/site/about/guidelines.xhtml</a> |    |                                                                                                                                                                                                          |                    |

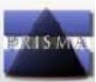

# PRISMA 2009 Checklist

1  
2  
3  
4  
5  
6  
7  
8  
9  
10  
11  
12  
13  
14  
15  
16  
17  
18  
19  
20  
21  
22  
23  
24  
25  
26  
27  
28  
29  
30  
31  
32  
33  
34  
35  
36  
37  
38  
39  
40  
41  
42  
43  
44  
45  
46  
47

|         |    |                                                                                                                                            |   |
|---------|----|--------------------------------------------------------------------------------------------------------------------------------------------|---|
| Funding | 27 | Describe sources of funding for the systematic review and other support (e.g., supply of data); role of funders for the systematic review. | 3 |
|---------|----|--------------------------------------------------------------------------------------------------------------------------------------------|---|

*From:* Moher D, Liberati A, Tetzlaff J, Altman DG, The PRISMA Group (2009). Preferred Reporting Items for Systematic Reviews and Meta-Analyses: The PRISMA Statement. PLoS Med 6(7): e1000097. doi:10.1371/journal.pmed1000097

For more information, visit: [www.prisma-statement.org](http://www.prisma-statement.org).

For peer review only

# BMJ Open

## Identification of mental health and quality of life outcomes in primary care databases in the United Kingdom: a systematic review

|                                 |                                                                                                                                                                                                                                                                                                                                                                                                                                                                                                                                                                                       |
|---------------------------------|---------------------------------------------------------------------------------------------------------------------------------------------------------------------------------------------------------------------------------------------------------------------------------------------------------------------------------------------------------------------------------------------------------------------------------------------------------------------------------------------------------------------------------------------------------------------------------------|
| Journal:                        | <i>BMJ Open</i>                                                                                                                                                                                                                                                                                                                                                                                                                                                                                                                                                                       |
| Manuscript ID                   | bmjopen-2019-029227.R1                                                                                                                                                                                                                                                                                                                                                                                                                                                                                                                                                                |
| Article Type:                   | Research                                                                                                                                                                                                                                                                                                                                                                                                                                                                                                                                                                              |
| Date Submitted by the Author:   | 21-Mar-2019                                                                                                                                                                                                                                                                                                                                                                                                                                                                                                                                                                           |
| Complete List of Authors:       | Carreira, Helena; London School of Hygiene and Tropical Medicine Faculty of Epidemiology and Population Health, Department of Non-communicable Disease Epidemiology<br>Williams, Rachael; Medicines and Healthcare Products Regulatory Agency, Clinical Practice Research Datalink<br>Strongman, Helen; London School of Hygiene and Tropical Medicine, Department of Non-communicable Disease Epidemiology<br>Bhaskaran, Krishnan; London School of Hygiene and Tropical Medicine Faculty of Epidemiology and Population Health, Department of Non-communicable Disease Epidemiology |
| <b>Primary Subject Heading</b>: | Mental health                                                                                                                                                                                                                                                                                                                                                                                                                                                                                                                                                                         |
| Secondary Subject Heading:      | Research methods                                                                                                                                                                                                                                                                                                                                                                                                                                                                                                                                                                      |
| Keywords:                       | PRIMARY CARE, MENTAL HEALTH, Electronic health records databases                                                                                                                                                                                                                                                                                                                                                                                                                                                                                                                      |
|                                 |                                                                                                                                                                                                                                                                                                                                                                                                                                                                                                                                                                                       |

SCHOLARONE™  
Manuscripts

1  
2  
3 **Identification of mental health and quality of life outcomes in primary care databases**  
4 **in the United Kingdom: a systematic review**  
5  
6  
7

8 Helena Carreira<sup>1</sup>, Rachael Williams<sup>2</sup>, Helen Strongman<sup>1</sup>, Krishnan Bhaskaran<sup>1</sup>  
9

10  
11  
12 <sup>1</sup> Department of Non-Communicable Disease Epidemiology, Faculty of Epidemiology and  
13 Population Health, London School of Hygiene & Tropical Medicine, Keppel street, London  
14 WC1E 7HT, United Kingdom.  
15  
16

17  
18 <sup>2</sup> Clinical Practice Research Datalink (CPRD), Medicines and Healthcare products Regulatory  
19 Agency, 10th Floor, 10 South Colonnade, Canary Wharf, London E14 4PU, United Kingdom.  
20  
21

22  
23  
24  
25 **Correspondence to:**

26 Helena Carreira

27  
28 Department of Non-communicable Disease Epidemiology

29 Faculty of Epidemiology and Population Health

30 London School of Hygiene & Tropical Medicine

31 Keppel Street, London WC1E 7HT, United Kingdom.  
32  
33

34 [helena.carreira@lshtm.ac.uk](mailto:helena.carreira@lshtm.ac.uk)  
35  
36  
37  
38  
39  
40  
41  
42  
43  
44  
45  
46  
47  
48  
49  
50  
51  
52  
53  
54  
55  
56  
57  
58  
59  
60

## Abstract

*Objectives:* To summarise the definitions and combinations of codes used to identify outcomes of anxiety, depression, fatigue, cognitive dysfunction (including mild cognitive dysfunction and dementia), sexual dysfunction, pain, sleep disorders, and fatal and non-fatal self-harm in studies using electronic health records from primary care databases in the United Kingdom (UK).

*Design:* Systematic review.

*Data sources:* Medline, Embase, and lists of publications of the main primary care databases in the UK.

*Eligibility criteria:* Included data from a primary care database and studied outcome(s) of interest.

*Data extraction and synthesis:* We abstracted information on the outcomes definition and codelists. When necessary, authors were contacted to request codelists.

*Results:* 120 studies were eligible. Codelists were available for 17/42 studies of depression; 21/41 studies of fatal and non-fatal self-harm; 17/27 studies of dementia/cognitive dysfunction; 5/12 studies of anxiety; 4/8 studies of pain; 3/6 studies of fatigue and sexual dysfunction; 1/2 studies of sleep disorders. Depression was most often defined using codes for diagnoses (37/42 studies) and/or antidepressants prescriptions (21/42 studies); 6 studies reported including symptoms in their definition. Anxiety was defined with codes for diagnoses (12/12 studies); 4 studies also reported including symptoms. Fatal/non-fatal self-harm was ascertained in primary care data linked to the Office for National Statistics mortality database in 9 studies. Most studies of cognitive dysfunction included Alzheimer's disease, and vascular and frontotemporal dementias. Fatigue definitions varied little, including chronic fatigue syndrome, neurasthenia, and post viral fatigue syndrome. All studies of sexual dysfunction focused on male conditions, principally erectile dysfunction. Sleep disorders included insomnia and hypersomnia. There was substantial variability in the codelists; validation was carried out for 21/120 studies.

*Conclusions:* There is a need for standardized definitions and validated list of codes to assess mental health and quality of life outcomes in primary care databases in the UK.

### Strengths and limitations of this study

- Comprehensive systematic review of the literature aiming at describing the definitions and combination of codes used to identify outcomes of mental health and quality of life in electronic health records databases in the UK;
- Potential for error in the selection of the eligible studies minimised by duplication of the screening;
- The authors of the original studies were contacted to obtain the list of Read codes used when these were not publicly available;
- We only considered definitions of study outcomes, and did not consider studies where mental health or quality of life variables were covariates or exposure variables, limiting the generalisability of our results to these other contexts.

### Funding

This work was supported by the Medical Research Council (MRC) and the Clinical Practice Research Datalink (CPRD) at the Medicines and Healthcare products Regulatory Agency (MHRA) (grant number MR/M016234/1 to H.C.); and the Wellcome Trust and the Royal Society (grant number 107731/Z/15/Z to K.B.).

### Data availability

All data relevant to the study are included in the article or uploaded as supplementary information.

### Contributorship Statement

HC, RW and KB designed the study. HC and HS screened the list of references and abstracted information from the original studies. HC wrote the first draft of the manuscript. All authors revised the paper for important intellectual content.

### Acknowledgements

We would like to thank the authors of the original studies who kindly provided the list of codes used in their studies. We would also like to thank Daniel Dedman (CPRD/LSHTM) for helpful comments on the search expressions.

The copyright of the morbidity definitions/categorisations lists (©2014) obtained from the authors for the studies by Roddy et al, 2013, Abdul Sultan et al, 2017, and Mansfield et al, 2018, are owned by Keele University, the development of which was supported by the

1  
2  
3 Primary Care Research Consortium. The authors would like to acknowledge Keele  
4 University's Prognosis and Consultation Epidemiology Research Group who have given us  
5 permission to utilise the morbidity definitions/categorisations lists (©2014); for access/details  
6 relating to the morbidity definitions/categorisation lists (©2014) please go to  
7 [www.keele.ac.uk/mrr](http://www.keele.ac.uk/mrr).  
8  
9  
10  
11  
12

### 13 **Conflict of interest**

14  
15 Dr Bhaskaran reports grants from Wellcome Trust, the Royal Society, Medical Research  
16 Council, and British Heart Foundation, outside the submitted work. Dr Williams reports that  
17 CPRD has financial relationships with its clients, including the London School of Hygiene and  
18 Tropical Medicine, in relation to providing access to research data and services outside the  
19 submitted work. The other authors in this report have no conflict of interest to disclose.  
20  
21  
22  
23  
24  
25  
26  
27  
28  
29  
30  
31  
32  
33  
34  
35  
36  
37  
38  
39  
40  
41  
42  
43  
44  
45  
46  
47  
48  
49  
50  
51  
52  
53  
54  
55  
56  
57  
58  
59  
60



## Introduction

Primary care databases of electronic health records (EHR) in the United Kingdom (UK) such as The Clinical Practice Research Datalink (CPRD), QResearch or The Health Improvement Network (THIN) have been widely used to study mental health outcomes such as depression [1, 2], and other key aspects of quality of life, such as fatigue and pain [3, 4], even though the identification of patients with these conditions is not straightforward.

Strategies to identify patients with a given condition in the EHRs typically include generating lists of relevant codes, then searching the patients' record for these codes to identify symptoms, diagnoses, referrals, appointments for disease management and monitoring, and/or prescriptions of interest [5]. The process of developing a list of codes of interest, and deciding how to apply them, may be subjective. For example, a study on the selection of codes for stroke, a relatively well-defined clinical outcome, showed that researchers with clinical and epidemiological experience may have differing interpretations of the relevance of each code [6]. A systematic review on the identification of patients with cancer in UK primary care databases described several combinations of Read codes used across studies [7]. Estimates of validity of diagnoses in these databases have been generally high across disease types [8, 9], but the heterogeneity in the codelists raises issues of misclassification, and hampers the comparability of studies using the same data to assess the same outcome [10]. The pattern of use of the codes by the general practitioners (GPs) also needs consideration. For example, in recording depression, it has been shown that GPs have switched from diagnostic to symptom codes in recent years [11]; this may have a large impact on outcome definitions based around diagnostic codes. In addition, outcome definitions using prescription data may lead to misclassification where drugs have multiple indications: for example, sertraline, paroxetine, or escitalopram, amongst the most commonly used antidepressants, are also first-line treatments for generalised anxiety disorder [12]; and amitriptyline, a tricyclic antidepressant, is also a first-line treatment for neuropathic pain [13].

Given the broad interest in mental health and quality of life outcomes, and the strong potential for primary care data to contribute to studying these outcomes, our aim was to systematically review and summarise the strategies used to define such outcomes in previous studies, and the extent to which case definitions have been validated.

## Methods

This review followed the a priori defined methods specified in the systematic review protocol (appendix 1).

### Outcomes of interest

The outcomes of interest for this review were: anxiety, depression, fatigue, cognitive dysfunction, pain, sexual dysfunction, sleep disorder and fatal and non-fatal self-harm. We considered that a study provided data for cognitive dysfunction when dementia, mild cognitive impairment or single domains of cognitive function were studied (i.e. attention, executive function, memory, language, motor, and social). Composite outcomes of two or more of these outcomes (e.g. psychological impairment defined by anxiety or depression) were also eligible.

### Information sources and search strategy

We searched MEDLINE and Embase via Ovid®, from inception up to 28 June 2018, to identify studies that involved EHRs from primary care databases and studied one of the outcomes of interest (see above). The search expressions are provided in appendix 1, and combined terms to identify primary care databases, terms to identify mental health and quality of life outcomes, and terms indicating UK-based research. The CPRD, THIN and QResearch list of publications, available in their websites, were manually revised to identify additional studies. The lists of bibliographic references of the studies considered eligible for the review were also screened by hand to identify additional studies.

### Studies eligibility

We considered eligible the studies that used data from a primary care database that routinely gathers EHR data from primary care practices in the UK, and in which the outcome of interest was one of those of interest for this study (see list above). This included purely descriptive studies on the incidence/prevalence of the outcome and analytical studies where the condition of interest was one of the main outcomes of the study. Studies of primary care data linked to other sources of data, such as the Hospital Episode Statistics (HES) or the Office for National Statistics (ONS) mortality data, were also considered eligible.

Abstracts from conferences were excluded, as it was unlikely that the methods section would provide sufficiently detailed information on the definition of the outcomes. Studies of pain

1  
2  
3 caused by infectious agents (e.g. herpes zoster) were excluded; similarly, studies of sleep  
4 apnoea and narcolepsy were excluded due to their unlikely psychological origin [14, 15].  
5  
6 Studies reporting only on patterns of treatment of the conditions of interest were excluded,  
7  
8 unless pharmacological treatment was clearly used as a proxy for the definition of the  
9  
10 condition. Studies where the outcome of interest was comorbidity were also excluded. Where  
11  
12 there were multiple studies from the same group of authors, we considered these separately,  
13  
14 since the definition of the same outcomes could have been updated over time.

15  
16 The eligibility of the studies was determined by two authors (HC and HS) reviewing all  
17  
18 records retrieved from the publications databases. First, the title of each study was read to  
19  
20 determine the eligibility for the review; when the information provided in the title was  
21  
22 insufficient for a clear exclusion of the study, the study was considered for further  
23  
24 assessment. Secondly, the full text of each study not previously excluded was read, in order  
25  
26 to determine the eligibility. Disagreements over study eligibility between the two reviewers  
27  
28 were resolved by discussion, including with a third researcher (KB or RW) where needed.

#### 29 30 Data acquisition and extraction

31  
32 We abstracted data on study characteristics (title, study design), the primary care database  
33  
34 used, any database(s) linked to the primary care data, outcome(s) reported, definition of the  
35  
36 outcome(s) (i.e. Read codes, drug prescriptions, International Classification of Diseases  
37  
38 (ICD) codes, etc.) and any codelist available. When there were two or more definitions of the  
39  
40 outcome (e.g. used in sensitivity analyses), we abstracted all information but considered only  
41  
42 the main outcome for data analysis in this review. We also abstracted data on whether the  
43  
44 codelist had been validated, and any description related to the handling of past or prevalent  
45  
46 (at baseline in cohort studies) episodes of these outcomes. We considered that the study  
47  
48 had attempted to validate the list of codes when the results were compared to data from  
49  
50 another source, or when outcomes were confirmed by enquiring the patients' GP or by  
51  
52 reviewing the patients' medical record. The data extraction process was repeated by a  
53  
54 second author (HS) for 10% of the papers included for each outcome, to check for reliability  
55  
56 in the extraction process.

57  
58 When a study did not provide the codelist for the definition of the outcome in the original  
59  
60 publication or in a publicly available repository, we contacted the corresponding author of the  
study by email seeking this information (appendix 2). In the case of emails that could not be  
delivered to the corresponding author, we searched the contact of another study author,  
usually the first or the last author, and addressed the email to her/him; if this failed to be

1  
2  
3 delivered, no further attempt of contact was made. For all delivered emails, if no response  
4 was received within two weeks, a follow up email was sent.  
5  
6  
7

### 8 Data analysis

9  
10 We produced descriptive tables showing the number and proportion of studies eligible for  
11 each outcome, by primary care database and codelist availability. We described, for each  
12 outcome, the types of codes used in the definition of the outcomes (e.g. diagnosis codes,  
13 symptom codes, prescription codes). The lists of codes were also reviewed to assess the  
14 clinical characteristics of the disorders included (e.g. whether mixed anxiety and depression  
15 was included in the definition of anxiety or depression); this was done by manually reviewing  
16 the list of codes to identify codes related to different clinical characteristics of the specific  
17 outcome. To describe the Read codes most commonly used to identify these outcomes in  
18 the data, we produced a list of Read codes sorted by number of studies that used the code.  
19 The results of the validation studies described in the original papers were reported  
20 descriptively.  
21  
22  
23  
24  
25  
26  
27  
28

### 29 Patient and Public Involvement

30 No patients or public were involved in the design and conduct of this study.  
31  
32  
33  
34  
35  
36  
37  
38  
39  
40  
41  
42  
43  
44  
45  
46  
47  
48  
49  
50  
51  
52  
53  
54  
55  
56  
57  
58  
59  
60

## Results

Of 5,946 records initially identified in the bibliographic references search, 2,979 were discarded as being duplicated, which left 2,967 records to be assessed for eligibility (Figure 1). The title assessment resulted in the exclusion of 2,485 records, and 482 studies were considered for full text assessment. Of these, 368 studies were excluded, mostly because they were abstracts from conferences or did not evaluate relevant outcomes. Six papers were identified from the screening of the references. A total of 120 studies were eligible for the systematic review; list of codes were obtained for nearly half of the studies. The definitions and combinations of codes used to identify mental health and QoL outcomes from UK primary care databases were heterogeneous for all outcomes; there was particular variability in the inclusion/exclusion of codes for symptoms of the mental disorders. Prescriptions were not frequently used as proxy for mental disorders. Validation efforts were rarely employed. Detailed results for each outcome are provided below.

### *Anxiety*

12 studies had anxiety as an outcome (Table 1 and appendix 3 table 1); of these, two studied panic only [2, 16]. The list of codes used to identify outcomes of anxiety was available for 5 of the 12 studies (41.7%); in one study, the cases of anxiety were identified in CPRD data linked to HES. All 12 studies included codes for diagnosis of anxiety, and 4 (33.3%) included also codes for anxiety symptoms. Prescriptions were considered in the definition of the outcome in 1 study only (8.3%).

Of the 5 studies for which codelists were available, 5 included codes for generalized anxiety disorder (100%), 4 for phobia (80.0%), 4 for panic disorder/attacks (80.0%), 3 for mixed anxiety and depression (60.0%), and 2 for stress-related disorders (40.0%) (Table 2). Codes for post-traumatic stress disorder and obsession-compulsion were less often included (1 study each, 20.0%).

Only one study reported including drugs prescriptions in the definition of the outcome [17]; this considered diazepam and lorazepam only (Table 3).

Two studies [2, 18] assessed the validity of the codelists (Table 4). The proportion of cases confirmed was reported in one study: 73.5% for cases treated with anxiolytics, antidepressants and hypnotics, and 89.6% in those not pharmacologically treated [18].

Appendix 4 table 1 provides the list of Read codes used to identify patients with anxiety in the eligible studies; appendix 4 table 2 provides the list of ICD-10 codes.

### *Depression*

42 studies identified outcomes of depression (Table 1 and appendix 3 table 2). The list of codes used to identify outcomes of depression was available for 17 of the 42 studies (40.5%); 2 studies identified cases of depression in primary care data linked to HES data, using ICD-10 codes. Six studies defined depression by proxy of antidepressants intake only; the remaining 36 studies described to have included codes for diagnoses of depression and 6 (14.3%) studies also considered symptoms of depression in the definition of the outcome. 15 studies (35.7%) reported having excluded patients with history of depression.

Of the 17 studies for which the codelists were available, 10 included codes for mixed anxiety and depression (58.8%), 4 for bipolar disorder (23.5%) and 3 for depression in dementia (17.6%) (Table 2).

Antidepressant prescriptions, in isolation or combination with diagnostic/symptoms Read codes, were considered in the identification of patients with depression in 21 studies (50.0%); in 6 studies, depression was solely defined by the prescription of antidepressants (Table 3). The list of antidepressant categories was seldom provided; of the studies that reported this information, selective serotonin re-uptake inhibitors were the group most often considered (6 studies), followed by monoamine-oxidase inhibitors and tricyclic and related antidepressants drugs (3 studies each).

Five studies (11.9%) assessed the performance of the list of codes to identify patients with depression (Table 4). The proportion of cases confirmed was reported by two studies only: 83.3% [19] and 89.6% [20].

The list of Read codes used to identify patients with depression is provided in appendix 4 table 3; appendix 4 table 4 provides the list of ICD-10 codes.

### *Composite outcome of anxiety and depression*

Two studies provided data for composite outcomes of anxiety and depression (Table 1 and appendix 3 table 3). The codelist was available for the two studies. The studies reported including codes for symptoms as well as diagnosis of anxiety and depression, and included prescriptions of antidepressants and antianxiety drugs in the definition of the outcome.

John et al. [21] compared the performance of 12 different algorithms to identify patients with anxiety and depression in the Secure Anonymised Information Linkage Databank (SAIL); the positive predictive value of the Read codes for anxiety and depression diagnoses, symptoms and treatments, against the five-item Mental Health Inventory (gold-standard), varied

1  
2  
3 between 61% and 76% [21] (Table 4). The list of Read codes used to identify patients with  
4 composite outcomes of anxiety and depression is provided in appendix 4 table 5.  
5  
6  
7  
8

### 9 *Cognitive dysfunction (including dementia and mild cognitive dysfunction)*

10 27 studies reported outcomes of dementia or cognitive function (Table 1 and appendix 3  
11 table 4). The codelists were available for 17 studies (63.0%); in two studies dementia was  
12 ascertained in primary care data linked to other sources of data. All studies included codes  
13 for diagnosis of dementia or cognitive impairment, and 6 studies (22.2%) reported to have  
14 included also codes for symptoms of dementia. 21 studies (77.8%) referred to have excluded  
15 patients with prior diagnoses of dementia from longitudinal analyses.  
16  
17  
18  
19

20 Of the 17 studies for which the codelists were available, 13 reported codes for Alzheimer's  
21 disease (81.3%), 13 for vascular dementia (81.3%), 12 for frontotemporal dementia (75.0%),  
22 and 11 for Lewy bodies disease (68.8%) (Table 2). Three studies reported data for cognitive  
23 impairment without dementia (17.6%).  
24  
25  
26

27 Four studies (14.8%) used prescriptions in the identification of patients with dementia; all four  
28 included anticholinesterases and dopaminergic agents (Table 3).  
29

30 Five studies [22-26] involved validation of the list of codes; the proportion of cases confirmed  
31 varied between 74% and 100% (Table 4).  
32  
33

34 The list of Read codes used in the studies is provided in appendix 4 table 6; the list of ICD-10  
35 codes is provided in appendix 4 table 7.  
36  
37  
38  
39

### 40 *Fatigue*

41 Six studies had fatigue as the outcome (Table 1 and appendix 3 table 5). All studies  
42 considered codes for diagnoses of fatigue, and 5 studies also described including codes for  
43 symptoms of fatigue. The list of codes use to identify patients with fatigue was provided in 3  
44 studies (50.0%).  
45  
46  
47

48 The three studies for which the codelist was available included codes for chronic fatigue  
49 syndrome, neurasthenia and post-viral fatigue syndrome (Table 2). Fibromyalgia was  
50 included in two studies (66.7%). None of the studies assessed the validity of the list of the  
51 codes. The list of Read codes used in the studies of fatigue is available in appendix 4 table 8.  
52  
53  
54  
55  
56  
57  
58  
59  
60

### *Pain*

8 studies had pain as the outcome (Table 1 and appendix 3 table 6). The list of codes was available for 4 of the 8 studies. Of these 4 studies, three looked at pain by body site (i.e. chest, abdominal, musculoskeletal pain), one study studied widespread body pain (Table 2). Two studies included drugs in the identification of patients with pain; all considered anti-epileptics (in the absence of codes for an epilepsy diagnosis), anaesthetics, antidepressants and analgesics (Table 3).

Three studies validated the list of selection of the codes (Table 4). The proportion of cases confirmed varied between 56% and 86.4%. One study compared pain recorded in the EHR with pain reported in a survey; in 97% of the self-reported cases of pain, there was an entry in the EHR [27].

Appendix 4 table 9 provides the list of codes used in the original studies.

### *Sexual dysfunction*

Six studies had sexual dysfunction as an outcome, all of which focused on male sexual dysfunction (Table 1, appendix 3 table 7). Three studies provided codelists (50.0%). Of these, all included codes for erectile dysfunction and one study included codes for other male sexual dysfunctions (Table 2). Three studies included considered the prescription of drugs sufficient to ascertain the outcome; two studies considered phosphodiesterase type-5 inhibitors (Table 3). No study validated the list of codes used. The list of Read codes used in the original studies are available in appendix 4 table 10.

### *Sleep disorders*

Two studies were eligible for sleep disorders (Table 1, appendix 3 table 8); the two studies included diagnoses of insomnia, and one included hypersomnia as well (50%) (Table 2). The list of codes was available for one study. No validation was reported. Appendix 4 table 11 provides the list of Read codes used in the original study.

### *Fatal and non-fatal self-harm*

41 studies had outcomes related to fatal and non-fatal self-harm (Table 1 and appendix 3 table 9). The list of codes used to defined the outcomes was available for 21 studies (51.2%); 9 studies reported using ICD-10 codes.



1  
2  
3 Of the 21 studies for which the codelist was available, 17 studies (80.9%) included  
4 completed suicide, while 4 studies focused on attempted suicide only (19.1%). Of the 17  
5 studies including completed suicide as an outcome, 8 reported only completed suicides, 6  
6 considered completed and attempted suicides and 4 included complete and attempted  
7 suicide, as well as self-harm (Table 2). All studies where outcomes were identified using  
8 primary care data linked to ONS mortality data (gold-standard) considered deaths recorded  
9 as of undetermined intent in the definition of suicide.  
10  
11

12  
13  
14 Nine studies involved some method of validation of the list of cases identified via code  
15 search (Table 4). Four studies referred to have revised the clinical record of the patient to  
16 determine the final outcome and two studies asked the GPs to confirm the events. The  
17 proportion of cases confirmed varied between 21.2% and 97%. Hall et al [28] assessed the  
18 validity of cause of death recording in the THIN primary care database through search of the  
19 free text and death certificate review; the underlying cause of death registered in the death  
20 certificate was listed as the cause of death in the EHR in 70% of the cases. Thomas et al [29]  
21 compared the ascertainment of cases of suicide and self-harm using Read codes in CPRD,  
22 with those ascertained when data from HES and ONS mortality data were available. 26.1%  
23 of the cases of suicide identified in the ONS mortality data were registered in the CPRD  
24 primary care database. HES was considered the gold-standard for self-harm; 68.4% of the  
25 cases of self-harm in HES were identified as such in CPRD.  
26  
27

28  
29 Appendix 4 table 12 provides the list of Read codes used to identify outcomes of fatal and  
30 non-fatal self-harm in primary care data; appendix 4 table 13 includes the lists of ICD-10  
31 codes using in studies of linked data.  
32  
33  
34  
35  
36  
37  
38  
39  
40  
41  
42  
43  
44  
45  
46  
47  
48  
49  
50  
51  
52  
53  
54  
55  
56  
57  
58  
59  
60

## Discussion

### *Results overview*

This review summarised the definitions and combinations of codes used to identify outcomes of anxiety, depression, dementia and cognitive impairment, fatigue, pain, male sexual dysfunction, sleep disorder and self-injurious behaviour in primary care databases of patients in the UK. The list of codes used in the original studies was obtained for approximately half of the papers; the lack of detailed information on the definition of the outcomes in most studies raises important questions as to whether studies can be replicated by others. In the studies where the codelist was available, for all outcomes, there was substantial heterogeneity in the type of codes included (e.g. diagnoses and symptoms) and drugs selected to identify outcomes; for the remaining studies, the details provided in the original publications suggest a similar pattern. We also noted considerable variability in the clinical definition of some outcomes (e.g. inclusion/exclusion of bipolar disorders in studies of depression). Validation of codes used to identify these outcomes was rarely carried out; where done, positive predictive values of case definitions were variable but mostly above 80%. To overcome these issues in the current context of limited number of studies with validation efforts, it is imperative that researchers develop, validate and make publicly available code lists for these outcomes.

### *Strengths and limitations*

This review is based on an extensive search of the studies involving EHRs in the UK. Errors in study selection and data extraction were minimized by the independent assessment of the studies by two investigators. We contacted the authors of all original studies where the list of codes had not been provided in the original publication to seek this information; this largely improved the number of studies for which lists of codes were available, and contributed to a more detailed characterisation of the combination of codes used to defined mental health outcomes in primary care databases of EHR in the UK.

However, this review has limitations. Some relevant studies may have been missed due to imperfect search terms, as there is no MESH term for the primary care databases, and studies could be potentially missed if the keywords did not appear in the title and abstract, or due to inaccurate indexing in the publications database. We attempted to minimise the risk of missing potential eligible studies by using broad search terms incorporating both indexing terms and keywords, two databases with different indexing systems, and an additional manual check of the eligible studies and list of bibliographic references from the main EHR

1  
2  
3 databases. We only considered studies where mental health or quality of life variables were  
4 the outcomes of interest, limiting generalisability to other contexts. For example, we excluded  
5 studies where these variables were covariates because we expected that detailed  
6 information about covariate definitions would rarely be available. We also excluded studies  
7 where the mental health or quality of life variable was used to define the patient population  
8 (e.g. a study of risk of stroke in depressed patients), on the basis that decisions about how to  
9 define cases may have had quite different motivations in this context, compared with studies  
10 where the condition was the outcome of the study, making case definitions difficult to  
11 meaningfully compare. We included studies that explicitly referred to using prescription data  
12 as a proxy for the definition of the condition (e.g. treated depression assessed by proxy of  
13 antidepressant intake), but we acknowledge that it was not always clear to decide whether  
14 treatment of the condition was being used to define the condition. This could have resulted in  
15 a few studies erroneously excluded, even though this should have been minimised by the  
16 duplication of the search and study selection process by two researchers working  
17 independently, with discussion of all discordant results. It is unclear if the list of codes that  
18 could not be obtained differ in any systematic way to the ones obtained. Some authors  
19 expressed concerns over intellectual property when sharing the list of codes, and this may  
20 have been a bigger concern among those who put a lot of time and thought into their  
21 codelists; on the other hand, authors who have concerns about the quality of their codelist  
22 may have been less willing to share them. Lastly, we summarised the types of codes used to  
23 define the outcome based on what was stated in original studies' methods sections (because  
24 code lists were not available for all studies), but this may have been inaccurate: for example,  
25 some studies that reported in their methods only including diagnosis codes then provided  
26 code lists that appeared to also contain symptom codes.  
27  
28  
29  
30  
31  
32  
33  
34  
35  
36  
37  
38  
39  
40  
41  
42  
43  
44

#### *Availability of the list of codes*

45 The list of codes was provided in the original publications for just over a quarter of the  
46 studies. Contacting the authors resulted in codelists being made available for approximately  
47 half of the studies. For the remaining studies, the authors either could not be contacted (e.g.  
48 moved institutions, retired) or could not locate the relevant codelist (including for some  
49 studies where the paper had stated that the codelist would be available on request).  
50 Provision of codelists within the publication or in a web repository would eliminate the  
51 difficulties of authors having to be contacted and archived codelists retrieved. Most journals  
52 currently accept codelists in supplementary appendices. Codelists were hardly ever obtained  
53 for older studies, especially those published before 2000, when email addresses were not  
54  
55  
56  
57  
58  
59  
60

1  
2  
3 routinely included in the details of the corresponding authors. We searched for alternative  
4 contacts in these cases, but not always successfully.  
5  
6  
7  
8

### 9 *Variability in the definition of cases and codelists*

#### 10 Anxiety and depression

11  
12  
13 Anxiety was often defined with diagnostic and symptoms codes, and in a few studies by the  
14 prescription of anxiolytics and hypnotics. Even though the sensitivity of symptoms codes for  
15 anxiety is expected to be high, the positive predictive value is unknown. Anxiolytics may also  
16 result in misclassification of the outcomes, as they are currently discouraged as first line of  
17 treatment for anxiety [12] and are often prescribed for management of other conditions such  
18 as insomnia. No study considered antidepressants in the definition of anxiety even though  
19 these are currently used to manage anxiety [12]; this may have resulted in cases of anxiety  
20 treated with antidepressants, and where no Read code was available, being missed.  
21  
22

23  
24  
25  
26 The inclusion/exclusion of codes for symptoms may have a larger impact in the definition of  
27 depression, as it has been shown that GPs switched from diagnostic to symptoms codes  
28 after the introduction of performance indicators in the GP contract Quality and Outcomes  
29 Framework in 2006 [11] and under claims that depression was being over diagnosed [30,  
30 31]. Codelists solely relying on Read codes for diagnosis of depression are therefore likely to  
31 have low sensitivity, but the impact of including/excluding a specific code will be variable,  
32 depending on how often that code is used by GPs at the point of providing care. In a few  
33 studies, depression was defined by proxy of antidepressant prescribing, alone or in  
34 combination with Read codes for symptoms/diagnosis. Considering antidepressant  
35 prescribing in the definition of depression has several issues. Certain types of  
36 antidepressants are currently used as first line of treatment for other conditions, such as pain  
37 and anxiety, and the studies relying solely on this information will be affected by  
38 misclassification of the outcome; some studies took this into account by excluding low dose  
39 tricyclic antidepressants, usually prescribed for pain, from their list of codes used to define  
40 depression [32-34]. Amongst the studies that did include antidepressants in their definition,  
41 there was heterogeneity in the group of antidepressants included, with some studies  
42 selecting only a few specific drugs commonly used for the treatment of depression. Studies  
43 defining depression by proxy of antidepressant prescribing only are likely also to be affected  
44 by changes in the behaviour of antidepressant prescribing. In 2004, the National Institute for  
45 Clinical Excellence (NICE) issued guidelines discouraging antidepressants for mild  
46 depression [35], and in 2006 a performance indicator in the UK GP Quality and Outcomes  
47  
48  
49  
50  
51  
52  
53  
54  
55  
56  
57  
58  
59  
60

1  
2  
3 Framework pay for performance was introduced for depression severity assessed with  
4 validated symptoms questionnaires [36]. Following this measure, the proportion of new cases  
5 of pharmacologically treated depression decreased (from 73% in 2003 to 61% in 2012 [37]),  
6 but the proportion of recurrent episodes pharmacologically treated increased from 74.3% to  
7 77.8% [37]. Treatment duration times with antidepressants also increased over time [38]; this  
8 may affect the number of new episodes of depression identified in the studies. In several  
9 studies, the authors chose to report separate results for antidepressant prescribing, without  
10 using this information to ascertain the outcome of depression [39, 40]; this may partially be  
11 due to the difficulties of ascertaining the indications for which antidepressants were  
12 prescribed. John et al, 2016 explored the indications of antidepressants; more than half of  
13 the new antidepressant prescriptions were for depression, with increasing but low incidence  
14 of prescriptions for pain and anxiety, but the authors could not identify the indication for  
15 antidepressants in 17% of the new prescriptions [41].

16  
17  
18  
19  
20  
21  
22  
23  
24 Regardless of the type of codes included, authors will need to often choose the  
25 inclusion/exclusion of codes relating to the clinical profile of the patients. This may have a  
26 particular impact for conditions that are highly co-morbid. For example, the code for 'mixed  
27 anxiety and depression' was sometimes used in the definition of anxiety and in the definition  
28 of depression; anxiety and depression are highly co-morbid and the inclusion/exclusion of  
29 these patients may have an impact on the results. In addition, for depression, the inclusion of  
30 codes related to depression in the context of bipolar disease, dementia and schizophrenia  
31 may raise issues as to whether it represents a primary depressive episode.

32  
33  
34  
35  
36  
37 Part of the heterogeneity in the list of codes used to identify these outcomes may be  
38 explained by the complexity of these conditions and by the purpose for which these data are  
39 collected. Electronic health care data are primarily collected to provide patients with  
40 treatment, and distinctions between diagnosis and symptoms may have less weight at the  
41 point of care than when researchers aim to define these conditions using data routinely  
42 collected.

#### 43 44 45 46 47 Fatal and non-fatal self-harm

48  
49  
50  
51  
52  
53  
54  
55  
56  
57  
58  
59  
60  
Routinely collected primary care data was shown to have low sensitivity to detect cases of  
suicide [29]. Thus, record linkage to ONS mortality data is of interest; this has the advantage  
of including causes of death other than suicide. Ascertainment of the cause of death is not  
always straightforward when the death is non-natural, and several studies have included  
cases of accidents and open verdicts in their case definition. Open verdicts have been shown  
to include many similarities with suicides, and several are later registered as suicides; these  
are recommended to be included in studies of suicide [42]. Studies varied on whether cases

1  
2  
3 of self-harm without suicidal ideation were included (e.g. Rubino et al reviewed free text to  
4 exclude those who did not seem to have attempted suicide [43]). For self-harm, linkage to  
5 HES data will allow for more cases to be identified [29], even though authors must consider  
6 the balance between reduction of sample size and ascertainment of the outcome, as linkage  
7 is only available for a subset of patients.  
8  
9

### 10 11 Pain

12  
13 The aetiology and location of pain in the studies involved in this review varied due to our  
14 broad inclusion criteria. When pharmacological treatment was included in the definition of  
15 pain, this was most often done with prescriptions of antidepressants and anti-epileptics.  
16 Antidepressants such as first generation tricyclic antidepressants have been used for over 30  
17 years to manage neuropathic pain (e.g. amitriptyline, doxepin, clomipramine and dosulepin)  
18 [44]. Antiepileptic drugs reduce neuronal excitability and alleviate pain through several  
19 mechanisms [44].  
20  
21  
22  
23  
24  
25

### 26 Other outcomes

27  
28 We considered cognitive dysfunction as a composite outcome including studies from mild to  
29 severe impairments such as those in dementia; between 10% to 20% of the patients with  
30 mild cognitive impairment are expected to convert to dementia [45, 46]. Fewer studies had  
31 fatigue, sexual dysfunction and sleep disorders as the outcome, and no study was eligible for  
32 female sexual dysfunction. The definition of these outcomes varied little across the studies  
33 but the small numbers preclude firm conclusions. It has been reported that chronic fatigue  
34 increased prior to 2001 [3], but decreased between 2001 and 2013 [47], possibly due to the  
35 introduction of diagnostic criteria from NICE [48]; in the same period, increases were noted in  
36 the diagnoses of fibromyalgia [47]. This may reflect the complexity of diagnosing fatigue,  
37 which is done by exclusion of other causes only [48].  
38  
39  
40  
41  
42  
43  
44  
45  
46  
47

### 48 *Validation*

49 Outcomes identified in EHRs may lack of validity: a person meeting the operational definition  
50 for the outcome based on specific codes may not have the diagnosis or vice-versa. Only a  
51 small number of studies assessed validity in their studies, and this was almost always about  
52 assessing positive predictive value of the case definition, with sensitivity and specificity rarely  
53 explored. Of these, some studies only stated that validation had been carried out, but did not  
54 report the results, which makes the performance of the case definition unclear. However, the  
55 studies that reported results tended to show a high proportion of cases confirmed by their  
56 primary care physician or by further investigations (i.e. a high positive predictive value). This  
57  
58  
59  
60

1  
2  
3 is in accordance with the results of two systematic reviews that assessed the validity of the  
4 diagnostic coding within the CPRD primary care database [8, 9]. Studies in which identified  
5 cases were validated by the GP did not usually specify how this validation was done – i.e.  
6 whether the GPs confirmed cases by consulting the EHR, referring to additional information,  
7 relying on memory, or using other methods. If GPs simply checked the same EHR used to  
8 identify the case in the first place, resulting estimates of positive predictive value would be  
9 expected to be high, but may be misleadingly optimistic.  
10  
11  
12  
13  
14  
15  
16

### 17 *Implications*

18 Mental health and quality of life-related outcomes are difficult to identify in EHR databases  
19 and thus extra care needs to be used when defining these outcomes. The use of a particular  
20 code varies between GP practices; for example, a study on the inter-practice use of Read  
21 codes for diabetes showed that the most generic code was used in 14% to 98% of the  
22 patients with diabetes in the practice [49]. GPs can derive Read codes for their practice; this  
23 may raise issues with new codes being added over time [50], and codelists that need to be  
24 updated. It is important that authors clearly document the process of selection of the codes,  
25 so that these are available with clear rationale if needed [5]. Repositories of lists of codes  
26 allow researchers to access codelists easily. However, these repositories also need funding  
27 to be maintained, which limits their stability and consequently their use. Some studies of  
28 depression and dementia referred to using the Read codes recommended by the Quality and  
29 Outcomes Framework [36]; these are likely to be highly specific. It is also important to better  
30 understand the patterns of recording of some of these conditions, as changes in the patterns  
31 of use of the codes may have impact in the list of codes chosen. The inclusion of codes for  
32 symptoms and prescriptions must consider what is known about the use of codes by GPs at  
33 the point of patient providing care, as data recording in this setting is primarily intended to  
34 support clinical care. Future works are need to understand how GPs conceptualise mental  
35 health problems, as these are expected to have less stringent definitions than psychiatrists,  
36 and this could provide insights into more meaningful case definitions.  
37  
38  
39  
40  
41  
42  
43  
44  
45  
46  
47  
48

49 Validation of the outcomes appears to be essential to understand the validity of case  
50 definitions. A balance between sensitivity and specificity may be considered depending on  
51 the aim of the study [5]; for depression, for example, the inclusion of terms such as ‘Low  
52 mood’ may increase sensitivity, at the expense of decreased specificity, as some individuals  
53 who would not fit more stringent criteria for a diagnosis will be incorrectly classified as  
54 depressed [5]. A particular challenge with validation of primary care-based mental health  
55 outcomes is quantifying false negatives, which requires linkage to a high quality external  
56  
57  
58  
59  
60

1  
2  
3 source of information, to identify cases that may have been “missed” in primary care records.  
4 The Mental Health Dataset (MHDS), which includes individual patient records of adults  
5 seeking mental health services in secondary care and has recently been made available for  
6 linkage with CPRD primary care databases, represents an opportunity to assess the  
7 proportion of false negatives identified with the code lists, at least for more severe outcomes.  
8 Until then, sensitivity analysis using different lists of codes should be done, so that results  
9 can be compared and the impact of using different code lists evaluated. The consequences  
10 of underascertaining mental health outcomes are likely to depend on study design; in a  
11 cohort design this will not generally result in biased relative risks, whereas in a case-control  
12 context, a bias towards the null is likely. Studies might consider to use internal validation  
13 strategies, by assessing the proportion of patients referred for treatment or prescribed a  
14 relevant pharmacological agent.  
15

16  
17 Primary care databases of electronic health records have made important contributions to  
18 medicine worldwide, particularly in the fields of infectious, respiratory and cardiovascular  
19 diseases. The burden of mental disorders in high-income countries has increased  
20 substantially in the last decades [51], and more research is needed to be better understand  
21 these conditions. Primary care databases of EHRs have potential to make huge contributions  
22 to this area but, for this to happen, we need coordinated efforts across funding and research  
23 organisations to improve data quality. For example, if scientific journals make a requirement  
24 of having publically available lists of codes, this would likely encourage researchers to spend  
25 more time defining the outcomes and potentially seek funding for validation studies, which in  
26 turn could increase the awareness of funding institutions for the importance of assessing  
27 data quality in projects using these data. In the meantime, transparency in the list of codes  
28 used to define these outcomes and reporting of sensitivity analysis with different lists of  
29 codes are key.  
30

31  
32 Despite the difficulties of assessing each separate outcome, we must take into account that  
33 mental health disorder symptoms often overlap, and is difficult to disentangle what is  
34 attributable to each condition. Lastly, these conditions have a long period of exposure to  
35 medication after symptoms have disappeared, besides a high probability of relapse and  
36 recurrence [52], which may raise issues on whether the condition is incident or prevalent.  
37  
38  
39  
40  
41  
42  
43  
44  
45  
46  
47  
48  
49  
50  
51  
52  
53  
54  
55  
56  
57  
58  
59  
60



## Conclusions

Detailed information about codes used to identify outcomes of anxiety, depression, fatigue, cognitive dysfunction, sexual dysfunction, pain, sleep disorders, and fatal and non-fatal self-harm in studies using electronic health records from primary care databases in the United Kingdom (UK) was unavailable for around half of studies of these outcomes. Where available, there was substantial heterogeneity in the list of codes used to ascertain cases. Most studies did not validate case definitions, though when this was done, positive predictive values were generally high. This review focused on common mental health disorders and quality of life outcomes, but our conclusions are likely to be generalizable to other mental health outcomes. Caution is needed when interpreting and comparing results between studies, as heterogeneity in case definitions may be large. Future studies should fully report outcomes definitions, use sensitivity analysis to mitigate uncertainties about the impact of the case definition on studies' reported outcomes, and seek to validate the list of codes used to identify these outcomes.

**Authors' contributions**

HC, RW and KB designed the study. HC and HS screened the bibliographic references and performed data extraction. HC wrote the first draft of the article. All authors revised the article for important intellectual content and agreed with the final version.

For peer review only

1  
2  
3  
4  
5  
6  
7  
8  
9  
10  
11  
12  
13  
14  
15  
16  
17  
18  
19  
20  
21  
22  
23  
24  
25  
26  
27  
28  
29  
30  
31  
32  
33  
34  
35  
36  
37  
38  
39  
40  
41  
42  
43  
44  
45  
46  
47  
48  
49  
50  
51  
52  
53  
54  
55  
56  
57  
58  
59  
60

**Figure legend**

Figure 1 - Systematic review flowchart.

For peer review only

## References

1. Jick SS, HM Kremers, and C Vasilakis-Scaramozza. Isotretinoin use and risk of depression, psychotic symptoms, suicide, and attempted suicide. *Arch Dermatol* 2000;136:1231-6.
2. Meier CR, K Wilcock, and SS Jick. The risk of severe depression, psychosis or panic attacks with prophylactic antimalarials. *Drug Saf* 2004;27:203-13.
3. Gallagher AM, JM Thomas, WT Hamilton, and PD White. Incidence of fatigue symptoms and diagnoses presenting in UK primary care from 1990 to 2001. *J R Soc Med* 2004;97:571-5.
4. Hall GC, SV Morant, D Carroll, ZL Gabriel, et al. An observational descriptive study of the epidemiology and treatment of neuropathic pain in a UK general population. *BMC Fam Pract* 2013;14:28.
5. Dave S and I Petersen. Creating medical and drug code lists to identify cases in primary care databases. *Pharmacoepidemiol Drug Saf* 2009;18:704-7.
6. Gulliford MC, J Charlton, M Ashworth, AG Rudd, et al. Selection of medical diagnostic codes for analysis of electronic patient records. Application to stroke in a primary care database. *PLoS One* 2009;4:e7168.
7. Ranopa M, I Douglas, T van Staa, L Smeeth, et al. The identification of incident cancers in UK primary care databases: a systematic review. *Pharmacoepidemiol Drug Saf* 2015;24:11-8.
8. Herrett E, SL Thomas, WM Schoonen, L Smeeth, et al. Validation and validity of diagnoses in the General Practice Research Database: a systematic review. *Br J Clin Pharmacol* 2010;69:4-14.
9. Khan NF, SE Harrison, and PW Rose. Validity of diagnostic coding within the General Practice Research Database: a systematic review. *Br J Gen Pract* 2010;60:e128-36.
10. Herrett E, AM Gallagher, K Bhaskaran, H Forbes, et al. Data Resource Profile: Clinical Practice Research Datalink (CPRD). *Int J Epidemiol* 2015;44:827-36.
11. Kendrick T, B Stuart, C Newell, AW Geraghty, et al. Changes in rates of recorded depression in English primary care 2003-2013: Time trend analyses of effects of the economic recession, and the GP contract quality outcomes framework (QOF). *J Affect Disord* 2015;180:68-78.
12. National Institute for Health and Care Excellence (NICE), *Generalised anxiety disorder and panic disorder in adults: management (CG113)*, 2011.
13. Moore RA, S Derry, D Aldington, P Cole, et al. Amitriptyline for neuropathic pain in adults. *Cochrane Database Syst Rev* 2015:CD008242.
14. Lurie A. Obstructive sleep apnea in adults: epidemiology, clinical presentation, and treatment options. *Adv Cardiol* 2011;46:1-42.
15. Szabo ST, MJ Thorpy, G Mayer, JH Peever, et al. Neurobiological and immunogenetic aspects of narcolepsy: Implications for pharmacotherapy. *Sleep Med Rev* 2018;43:23-36.
16. Fardet L, I Petersen, and I Nazareth. Suicidal behavior and severe neuropsychiatric disorders following glucocorticoid therapy in primary care. *Am J Psychiatry* 2012;169:491-7.
17. Bouras G, SR Markar, EM Burns, HA Mackenzie, et al. Linked Hospital and Primary Care Database Analysis of the Incidence and Impact of Psychiatric Morbidity Following Gastrointestinal Cancer Surgery in England. *Ann Surg* 2016;264:93-9.
18. Martin-Merino E, A Ruigomez, MA Wallander, S Johansson, et al. Prevalence, incidence, morbidity and treatment patterns in a cohort of patients diagnosed with anxiety in UK primary care. *Fam Pract* 2010;27:9-16.
19. Yang CC, SS Jick, and H Jick. Lipid-lowering drugs and the risk of depression and suicidal behavior. *Arch Intern Med* 2003;163:1926-32.
20. Martin-Merino E, A Ruigomez, S Johansson, MA Wallander, et al. Study of a cohort of patients newly diagnosed with depression in general practice: prevalence, incidence,

- 1  
2  
3 comorbidity, and treatment patterns. *Prim Care Companion J Clin Psychiatry*  
4 2010;12:PCC 08m00764.
- 5 21. John A, J McGregor, D Fone, F Dunstan, et al. Case-finding for common mental  
6 disorders of anxiety and depression in primary care: an external validation of routinely  
7 collected data. *BMC Med Inform Decis Mak* 2016;16:35.
- 8 22. Imfeld P, YB Brauchli Pernus, SS Jick, and CR Meier. Epidemiology, co-morbidities,  
9 and medication use of patients with Alzheimer's disease or vascular dementia in the  
10 UK. *J Alzheimers Dis* 2013;35:565-73.
- 11 23. Imfeld P, M Bodmer, SS Jick, and CR Meier. Benzodiazepine Use and Risk of  
12 Developing Alzheimer's Disease or Vascular Dementia: A Case-Control Analysis.  
13 *Drug Saf* 2015;38:909-19.
- 14 24. Dunn N, C Holmes, and M Mullee. Does lithium therapy protect against the onset of  
15 dementia? *Alzheimer Dis Assoc Disord* 2005;19:20-2.
- 16 25. Strom BL, R Schinnar, J Karlawish, S Hennessy, et al. Statin Therapy and Risk of  
17 Acute Memory Impairment. *JAMA Intern Med* 2015;175:1399-405.
- 18 26. Dunn N, M Mullee, VH Perry, and C Holmes. Association between dementia and  
19 infectious disease: evidence from a case-control study. *Alzheimer Dis Assoc Disord*  
20 2005;19:91-4.
- 21 27. Mansfield KE, J Sim, P Croft, and KP Jordan. Identifying patients with chronic  
22 widespread pain in primary care. *Pain* 2017;158:110-119.
- 23 28. Hall GC. Validation of death and suicide recording on the THIN UK primary care  
24 database. *Pharmacoepidemiol Drug Saf* 2009;18:120-31.
- 25 29. Thomas KH, N Davies, C Metcalfe, F Windmeijer, et al. Validation of suicide and self-  
26 harm records in the Clinical Practice Research Datalink. *Br J Clin Pharmacol*  
27 2013;76:145-57.
- 28 30. Dowrick C and A Frances. Medicalising unhappiness: new classification of depression  
29 risks more patients being put on drug treatment from which they will not benefit. *BMJ*  
30 2013;347:f7140.
- 31 31. Spence D. Are antidepressants overprescribed? Yes. *BMJ* 2013;346:f191.
- 32 32. Smith DJ, H Court, G McLean, D Martin, et al. Depression and multimorbidity: a  
33 cross-sectional study of 1,751,841 patients in primary care. *J Clin Psychiatry*  
34 2014;75:1202-8; quiz 1208.
- 35 33. Agur K, G McLean, K Hunt, B Guthrie, et al. How Does Sex Influence Multimorbidity?  
36 Secondary Analysis of a Large Nationally Representative Dataset. *Int J Environ Res*  
37 *Public Health* 2016;13:391.
- 38 34. Cooper SA, G McLean, B Guthrie, A McConnachie, et al. Multiple physical and  
39 mental health comorbidity in adults with intellectual disabilities: population-based  
40 cross-sectional analysis. *BMC Fam Pract* 2015;16:110.
- 41 35. National Institute for Health and Care Excellence (NICE), *Depression - Management*  
42 *of depression in primary and secondary care. Clinical Guideline 23, 2004.*
- 43 36. BMA and NHS Employers, *Revisions to the GMS contract 2006/07. Delivering*  
44 *investment in general practice.*
- 45 37. Kendrick T, B Stuart, C Newell, AW Geraghty, et al. Did NICE guidelines and the  
46 Quality Outcomes Framework change GP antidepressant prescribing in England?  
47 Observational study with time trend analyses 2003-2013. *J Affect Disord*  
48 2015;186:171-7.
- 49 38. Moore M, HM Yuen, N Dunn, MA Mullee, et al. Explaining the rise in antidepressant  
50 prescribing: a descriptive study using the general practice research database. *BMJ*  
51 2009;339:b3999.
- 52 39. Khan NF, AM Ward, E Watson, and PW Rose. Consulting and prescribing behaviour  
53 for anxiety and depression in long-term survivors of cancer in the UK. *Eur J Cancer*  
54 2010;46:3339-44.
- 55  
56  
57  
58  
59  
60

- 1
  - 2
  - 3
  - 4
  - 5
  - 6
  - 7
  - 8
  - 9
  - 10
  - 11
  - 12
  - 13
  - 14
  - 15
  - 16
  - 17
  - 18
  - 19
  - 20
  - 21
  - 22
  - 23
  - 24
  - 25
  - 26
  - 27
  - 28
  - 29
  - 30
  - 31
  - 32
  - 33
  - 34
  - 35
  - 36
  - 37
  - 38
  - 39
  - 40
  - 41
  - 42
  - 43
  - 44
  - 45
  - 46
  - 47
  - 48
  - 49
  - 50
  - 51
  - 52
  - 53
  - 54
  - 55
  - 56
  - 57
  - 58
  - 59
  - 60
40. Sheehan R, A Hassiotis, K Walters, D Osborn, et al. Mental illness, challenging behaviour, and psychotropic drug prescribing in people with intellectual disability: UK population based cohort study. *BMJ* 2015;351:h4326.
41. John A, AL Marchant, DL Fone, JI McGregor, et al. Recent trends in primary-care antidepressant prescribing to children and young people: an e-cohort study. *Psychol Med* 2016;46:3315-3327.
42. Linsley KR, K Schapira, and TP Kelly. Open verdict v. suicide - importance to research. *Br J Psychiatry* 2001;178:465-8.
43. Rubino A, N Roskell, P Tennis, D Mines, et al. Risk of suicide during treatment with venlafaxine, citalopram, fluoxetine, and dothiepin: retrospective cohort study. *BMJ* 2007;334:242.
44. Ryder S and Stannard C. Treatment of chronic pain: antidepressant, antiepileptic and antiarrhythmic drugs. *Continuing Education in Anaesthesia Critical Care & Pain* 2005;5:18-21.
45. Alegret M, G Cuberas-Borros, G Vinyes-Junque, A Espinosa, et al. A two-year follow-up of cognitive deficits and brain perfusion in mild cognitive impairment and mild Alzheimer's disease. *J Alzheimers Dis* 2012;30:109-20.
46. Morris JC and J Cummings. Mild cognitive impairment (MCI) represents early-stage Alzheimer's disease. *J Alzheimers Dis* 2005;7:235-9; discussion 255-62.
47. Collin SM, IJ Bakken, I Nazareth, E Crawley, et al. Trends in the incidence of chronic fatigue syndrome and fibromyalgia in the UK, 2001-2013: a Clinical Practice Research Datalink study. *J R Soc Med* 2017;110:231-244.
48. National Institute for Health and Care Excellence (NICE), *Chronic fatigue syndrome/myalgic encephalomyelitis (or encephalopathy): diagnosis and treatment (CG53)*, 2007.
49. Gray J, D Orr, and A Majeed. Use of Read codes in diabetes management in a south London primary care group: implications for establishing disease registers. *BMJ* 2003;326:1130.
50. Shephard E, S Stapley, and W Hamilton. The use of electronic databases in primary care research. *Fam Pract* 2011;28:352-4.
51. G. B. D. Disease Injury Incidence Prevalence Collaborators. Global, regional, and national incidence, prevalence, and years lived with disability for 310 diseases and injuries, 1990-2015: a systematic analysis for the Global Burden of Disease Study 2015. *Lancet* 2016;388:1545-1602.
52. National Institute for Health and Care Excellence (NICE), *Depression in adults with a chronic physical health problem: recognition and management (CG91)*, 2009.

Table 1. Characteristics of the studies included in the systematic review.

|                                                           | Anxiety |       | Depression |       | Anxiety and depression (composite outcome) |       | Dementia/cognitive impairment |       | Fatigue |       | Pain |       | Sexual dysfunction (male) |       | Sleep disorders |       | Fatal and non-fatal self-harm |       |
|-----------------------------------------------------------|---------|-------|------------|-------|--------------------------------------------|-------|-------------------------------|-------|---------|-------|------|-------|---------------------------|-------|-----------------|-------|-------------------------------|-------|
|                                                           | N       | %     | N          | %     | N                                          | %     | N                             | %     | N       | %     | N    | %     | N                         | %     | N               | %     | N                             | %     |
| <b>Total number of studies</b>                            | 12      | 100.0 | 42         | 100.0 | 2                                          | 100.0 | 27                            | 100.0 | 6       | 100.0 | 8    | 100.0 | 6                         | 100.0 | 2               | 100.0 | 41                            | 100.0 |
| <b>Main primary care database</b>                         |         |       |            |       |                                            |       |                               |       |         |       |      |       |                           |       |                 |       |                               |       |
| CPRD                                                      | 7       | 58.3  | 24         | 57.1  | 0                                          | 0.0   | 21                            | 77.8  | 5       | 83.3  | 5    | 62.5  | 4                         | 66.7  | 1               | 50.0  | 31                            | 75.6  |
| PCCIU                                                     | 0       | 0.0   | 1          | 2.4   | 0                                          | 0.0   | 0                             | 0.0   | 0       | 0.0   | 0    | 0.0   | 0                         | 0.0   | 0               | 0.0   | 0                             | 0.0   |
| THIN                                                      | 5       | 41.7  | 10         | 23.8  | 1                                          | 50.0  | 5                             | 18.5  | 1       | 16.7  | 0    | 0.0   | 2                         | 33.3  | 0               | 0.0   | 6                             | 14.6  |
| Other                                                     | 0       | 0.0   | 7          | 16.7  | 1                                          | 50.0  | 1                             | 3.7   | 0       | 0.0   | 3    | 37.5  | 0                         | 0.0   | 1               | 50.0  | 4                             | 9.8   |
| <b>Outcome ascertained using linked data (HES or ONS)</b> |         |       |            |       |                                            |       |                               |       |         |       |      |       |                           |       |                 |       |                               |       |
| Yes                                                       | 1       | 8.3   | 2          | 4.8   | 0                                          | 0.0   | 2                             | 7.4   | 0       | 0.0   | 0    | 0.0   | 0                         | 0.0   | 0               | 0.0   | 9                             | 22.0  |
| No                                                        | 11      | 91.7  | 40         | 95.2  | 2                                          | 100.0 | 25                            | 92.6  | 6       | 100.0 | 8    | 100.0 | 6                         | 100.0 | 2               | 100.0 | 32                            | 78.0  |
| <b>Code list availability</b>                             |         |       |            |       |                                            |       |                               |       |         |       |      |       |                           |       |                 |       |                               |       |
| Total number of studies with code lists available         | 5       | 41.7  | 17         | 40.5  | 2                                          | 100.0 | 17                            | 63.0  | 3       | 50.0  | 4    | 50.0  | 3                         | 50.0  | 1               | 50.0  | 21                            | 51.2  |
| Stated in publication                                     | 2       | 16.7  | 7          | 16.7  | 1                                          | 50.0  | 10                            | 37.0  | 1       | 16.7  | 2    | 25.0  | 2                         | 33.3  | 1               | 50.0  | 17                            | 41.5  |
| Cited another paper or web repository                     | 0       | 0.0   | 0          | 0.0   | 0                                          | 0.0   | 0                             | 0.0   | 0       | 0.0   | 1    | 12.5  | 0                         | 0.0   | 0               | 0.0   | 0                             | 0.0   |
| Obtained from authors                                     | 3       | 25.0  | 10         | 23.8  | 1                                          | 50.0  | 7                             | 25.9  | 2       | 33.3  | 1    | 12.5  | 1                         | 16.7  | 0               | 0.0   | 4                             | 9.8   |
| Total number of studies with code lists not available     | 7       | 58.3  | 25         | 59.5  | 0                                          | 0.0   | 10                            | 37.0  | 3       | 50.0  | 4    | 50.0  | 3                         | 50.0  | 1               | 50.0  | 20                            | 48.8  |
| Cited another paper or web repository but couldn't obtain | 1       | 8.3   | 1          | 2.4   | 0                                          | 0.0   | 1                             | 3.7   | 1       | 16.7  | 0    | 0.0   | 0                         | 0.0   | 0               | 0.0   | 3                             | 7.3   |
| Stated available on request but didn't provide            | 2       | 16.7  | 4          | 9.5   | 0                                          | 0.0   | 3                             | 11.1  | 2       | 33.3  | 0    | 0.0   | 1                         | 16.7  | 1               | 50.0  | 0                             | 0.0   |
| Not mentioned in the paper and didn't provide             | 4       | 33.3  | 19         | 45.2  | 0                                          | 0.0   | 6                             | 22.2  | 0       | 0.0   | 4    | 50.0  | 2                         | 33.3  | 0               | 0.0   | 17                            | 41.5  |
| <b>Type of codes available †</b>                          |         |       |            |       |                                            |       |                               |       |         |       |      |       |                           |       |                 |       |                               |       |
| Read/medical codes                                        | 5       | 100.0 | 14         | 82.4  | 2                                          | 100.0 | 17                            | 100.0 | 3       | 100.0 | 4    | 100.0 | 3                         | 100.0 | 1               | 100.0 | 8                             | 42.1  |
| OXMIS codes                                               | 0       | 0.0   | 3          | 17.6  | 0                                          | 0.0   | 0                             | 0.0   | 0       | 0.0   | 2    | 50.0  | 0                         | 0.0   | 0               | 0.0   | 8                             | 42.1  |
| ICD codes                                                 | 1       | 20.0  | 2          | 4.8   | 0                                          | 0.0   | 2                             | 11.7  | 0       | 0.0   | 0    | 0.0   | 0                         | 0.0   | 0               | 0.0   | 9                             | 47.4  |

|                                                             | Anxiety |       | Depression |    | Anxiety and depression (composite outcome) |      | Dementia/cognitive impairment |       | Fatigue |    | Pain  |      | Sexual dysfunction (male) |       | Sleep disorders |   | Fatal and non-fatal self-harm |     |      |       |     |       |       |     |    |      |
|-------------------------------------------------------------|---------|-------|------------|----|--------------------------------------------|------|-------------------------------|-------|---------|----|-------|------|---------------------------|-------|-----------------|---|-------------------------------|-----|------|-------|-----|-------|-------|-----|----|------|
|                                                             | N       | %     | N          | %  | N                                          | %    | N                             | %     | N       | %  | N     | %    | N                         | %     | N               | % | N                             | %   |      |       |     |       |       |     |    |      |
| <b>Definition of the outcome †</b>                          |         |       |            |    |                                            |      |                               |       |         |    |       |      |                           |       |                 |   |                               |     |      |       |     |       |       |     |    |      |
| Study described that codes for diagnosis were included      |         |       |            |    |                                            |      |                               |       |         |    |       |      |                           |       |                 |   |                               |     |      |       |     |       |       |     |    |      |
| Yes [in isolation*]                                         | 12      | 100.0 | [5]        | 37 | 88.1                                       | [14] | 2                             | 100.0 | [0]     | 27 | 100.0 | [19] | 6                         | 100.0 | [1]             | - | -                             | 5   | 83.3 | [2]   | 2   | 100.0 | [2]   | -   | -  |      |
| No                                                          | 0       | 0.0   |            | 5  | 11.9                                       |      | 0                             | 0.0   |         | 0  | 0.0   |      | 0                         | 0.0   |                 | - | -                             | 1   | 16.7 |       | 0   | 0.0   |       | -   | -  |      |
| Unclear                                                     | 0       | 0.0   |            | 0  | 0.0                                        |      | 0                             | 0.0   |         | 0  | 0.0   |      | 0                         | 0.0   |                 | - | -                             | 0   | 0.0  |       | 0   | 0.0   |       | -   | -  |      |
| Study described that codes for symptoms were included       |         |       |            |    |                                            |      |                               |       |         |    |       |      |                           |       |                 |   |                               |     |      |       |     |       |       |     |    |      |
| Yes [in isolation*]                                         | 4       | 33.3  | [0]        | 6  | 14.3                                       | [0]  | 2                             | 100.0 | [0]     | 6  | 22.2  | [0]  | 5                         | 83.3  | [0]             | 8 | 100.0                         | [6] | 0    | 0.0   | [0] | 0     | 0.0   | [0] | -  | -    |
| No                                                          | 6       | 50.0  |            | 33 | 78.6                                       |      | 0                             | 0.0   |         | 20 | 74.1  |      | 1                         | 16.7  |                 | 0 | 0.0                           |     | 4    | 66.7  |     | 2     | 100.0 |     | -  | -    |
| Unclear                                                     | 2       | 16.7  |            | 3  | 7.1                                        |      | 0                             | 0.0   |         | 1  | 3.7   |      | 0                         | 0.0   |                 | 0 | 0.0                           |     | 2    | 33.3  |     | 0     | 0.0   |     | -  | -    |
| Study described that prescriptions were included            |         |       |            |    |                                            |      |                               |       |         |    |       |      |                           |       |                 |   |                               |     |      |       |     |       |       |     |    |      |
| Yes [in isolation*]                                         | 1       | 8.3   | [0]        | 21 | 50.0                                       | [6]  | 2                             | 100.0 | [0]     | 4  | 14.8  | [0]  | 0                         | 0.0   | [0]             | 2 | 25.0                          | [0] | 3    | 50.0  | [1] | 0     | 0.0   | [0] | -  | -    |
| No                                                          | 11      | 91.7  |            | 21 | 50.0                                       |      | 0                             | 0.0   |         | 23 | 85.2  |      | 6                         | 100.0 |                 | 6 | 75.0                          |     | 3    | 50.0  |     | 2     | 100.0 |     | -  | -    |
| Unclear                                                     | 0       | 0.0   |            | 0  | 0.0                                        |      | 0                             | 0.0   |         | 0  | 0.0   |      | 0                         | 0.0   |                 | 0 | 0.0                           |     | 0    | 0.0   |     | 0     | 0.0   |     | -  | -    |
| <b>Handling of outcomes occurring prior to study period</b> |         |       |            |    |                                            |      |                               |       |         |    |       |      |                           |       |                 |   |                               |     |      |       |     |       |       |     |    |      |
| Excluded                                                    | 5       | 41.7  |            | 15 | 35.7                                       |      | 0                             | 0.0   |         | 21 | 77.8  |      | 3                         | 50.0  |                 | 3 | 37.5                          |     | 1    | 16.7  |     | 1     | 50.0  |     | 7  | 17.1 |
| Adjusted/matched for                                        | 2       | 16.7  |            | 8  | 19.0                                       |      | 0                             | 0.0   |         | 1  | 3.7   |      | 1                         | 16.7  |                 | 0 | 0.0                           |     | 3    | 50.0  |     | 0     | 0.0   |     | 10 | 24.4 |
| Stratified results                                          | 1       | 8.3   |            | 3  | 7.1                                        |      | 2                             | 100.0 |         | 0  | 0.0   |      | 1                         | 16.7  |                 | 0 | 0.0                           |     | 3    | 50.0  |     | 0     | 0.0   |     | 4  | 9.8  |
| Not stated                                                  | 3       | 25.0  |            | 11 | 26.2                                       |      | 0                             | 0.0   |         | 1  | 3.7   |      | 0                         | 0.0   |                 | 3 | 37.5                          |     | 0    | 0.0   |     | 1     | 50.0  |     | 15 | 36.6 |
| Not applicable **                                           | 2       | 16.7  |            | 8  | 19.0                                       |      | 0                             | 0.0   |         | 4  | 14.8  |      | 2                         | 33.3  |                 | 2 | 25.0                          |     | 0    | 0.0   |     | 0     | 0.0   |     | 9  | 22.0 |
| <b>Validation of list of codes</b>                          |         |       |            |    |                                            |      |                               |       |         |    |       |      |                           |       |                 |   |                               |     |      |       |     |       |       |     |    |      |
| Yes                                                         | 2       | 16.7  |            | 5  | 11.9                                       |      | 1                             | 50.0  |         | 5  | 18.5  |      | 0                         | 0.0   |                 | 3 | 37.5                          |     | 0    | 0.0   |     | 0     | 0.0   |     | 9  | 22.0 |
| None stated                                                 | 10      | 83.3  |            | 37 | 88.1                                       |      | 1                             | 50.0  |         | 22 | 81.5  |      | 6                         | 100.0 |                 | 5 | 62.5                          |     | 6    | 100.0 |     | 2     | 100.0 |     | 32 | 78.0 |
| Study aiming at validating the outcome                      | 0       | 0.0   |            | 0  | 0.0                                        |      | 1                             | 50.0  |         | 0  | 0.0   |      | 0                         | 0.0   |                 | 0 | 0.0                           |     | 0    | 0.0   |     | 0     | 0.0   |     | 3  | 7.3  |



1 † Defined based on the description of the outcome provided in the original studies. Studies were considered to have included symptoms in the definition of the  
2 outcomes when this information was explicitly stated by the authors. Pain was considered a symptomatic outcome, regardless of how it was described in the  
3 original publications.  
4

5 \* The number of studies where the definition of the outcome included only this category of codes is provided in squared brackets.  
6

7 ‡ Refers only to studies providing codelists. A study may include more than one type of codes.  
8

9 \*\* Depends on study design and outcome. For example, it includes studies describing the epidemiology of first ever diagnoses or focusing on completed  
10 suicide only.  
11

12 CPRD – The Clinical Practice Research Datalink; HES – Hospital Episodes Statistics; ICD – International Classification of Diseases; ONS – Office for National  
13 Statistics; OXMIS – Oxford Medical Information System; PCCIU – Primary Care Clinical Informatics Unit Research Data Set; THIN – The Health Improvement  
14 Network.  
15  
16  
17  
18  
19  
20  
21  
22  
23  
24  
25  
26  
27  
28  
29  
30  
31  
32  
33  
34  
35  
36  
37  
38  
39  
40  
41  
42  
43  
44  
45  
46

**Table 2.** Clinical characteristics of the outcomes of interest in the studies for which the list of codes was available.

| Study included codes for:                      | N         | (% of total with code lists available) |
|------------------------------------------------|-----------|----------------------------------------|
| <b>Anxiety</b>                                 | <b>5</b>  | <b>100.0</b>                           |
| Generalized anxiety disorder                   | 5         | 100.0                                  |
| Panic disorder/attacks                         | 4         | 80.0                                   |
| Phobia                                         | 4         | 80.0                                   |
| Mixed anxiety and depression                   | 3         | 60.0                                   |
| Stress-related disorders                       | 2         | 40.0                                   |
| Obsession-compulsion                           | 1         | 20.0                                   |
| Post-traumatic stress disorder                 | 1         | 20.0                                   |
| <b>Depression</b>                              | <b>17</b> | <b>100.0</b>                           |
| Unipolar depression                            | 17        | 100.0                                  |
| Depression with psychotic symptoms             | 14        | 82.4                                   |
| Mixed anxiety and depression                   | 10        | 58.8                                   |
| Bipolar disorder                               | 4         | 23.5                                   |
| Depression in dementia                         | 3         | 17.6                                   |
| <b>Dementia / cognitive impairment</b>         | <b>17</b> | <b>100.0</b>                           |
| Alzheimer's disease                            | 13        | 81.3                                   |
| Vascular dementia                              | 13        | 81.3                                   |
| Frontotemporal dementia                        | 12        | 75.0                                   |
| Lewy Bodies disease                            | 11        | 68.8                                   |
| Mild cognitive impairment only                 | 3         | 17.6                                   |
| <b>Fatigue</b>                                 | <b>3</b>  | <b>100.0</b>                           |
| Chronic fatigue syndrome/ myalgic encephalitis | 3         | 100.0                                  |
| Neurasthenia                                   | 3         | 100.0                                  |
| Post viral fatigue syndrome                    | 3         | 100.0                                  |
| Fibromyalgia                                   | 2         | 66.7                                   |
| <b>Pain</b>                                    | <b>4</b>  | <b>100.0</b>                           |
| Chest pain                                     | 1         | 25.0                                   |
| Chronic widespread pain                        | 1         | 25.0                                   |
| Musculoskeletal pain                           | 1         | 25.0                                   |
| Unspecified abdominal pain                     | 1         | 25.0                                   |
| <b>Sexual dysfunction (male)</b>               | <b>3</b>  | <b>100.0</b>                           |
| Erectile dysfunction                           | 3         | 100.0                                  |
| Other male sexual dysfunctions                 | 1         | 33.3                                   |
| <b>Sleep disorder</b>                          | <b>1</b>  | <b>100.0</b>                           |
| Insomnia                                       | 1         | 100.0                                  |
| Hypersomnia                                    | 1         | 100.0                                  |
| <b>Fatal and non-fatal self-harm</b>           | <b>21</b> | <b>100.0</b>                           |
| <b>Completed suicide</b>                       | <b>17</b> | <b>80.9</b>                            |
| Completed suicide only                         | 8         | 38.1                                   |
| Completed and attempted suicide only           | 6         | 28.6                                   |
| Completed and attempted suicide, and self-harm | 4         | 19.1                                   |
| Included deaths of undetermined intent         | 7         | 33.3                                   |
| <b>Attempted suicide / self-harm</b>           | <b>4</b>  | <b>19.1</b>                            |

**Table 3.** Pharmacological categories used in the studies that used drug prescriptions to identify patients with the outcome of interest.

| <b>Outcome</b>                                                                                           | <b>Number of studies</b> | <b>%</b>     |
|----------------------------------------------------------------------------------------------------------|--------------------------|--------------|
| <b>Anxiety</b>                                                                                           | <b>12</b>                | <b>100.0</b> |
| Studies of anxiety that used drugs prescriptions only                                                    | 0                        | 0.0          |
| Studies of anxiety that used drugs prescriptions<br>Diazepam and lorazepam                               | 1                        | 8.3          |
|                                                                                                          | 1                        | 8.3          |
| <b>Depression</b>                                                                                        | <b>42</b>                | <b>100.0</b> |
| Studies of depression that used drugs prescriptions only                                                 | 6                        | 14.3         |
| Studies of depression that used drugs prescriptions<br>Antidepressants, categories not further specified | 21                       | 50.0         |
| Antidepressants, categories further specified                                                            | 15                       | 35.7         |
| Tricyclic and related antidepressant drugs                                                               | 6                        | 14.3         |
| Monoamine-oxidase inhibitors                                                                             | 3                        | 7.1          |
| Selective serotonin re-uptake inhibitors                                                                 | 3                        | 7.1          |
| Other antidepressant drugs                                                                               | 6                        | 14.3         |
|                                                                                                          | 3                        | 7.1          |
| <b>Dementia</b>                                                                                          | <b>27</b>                | <b>100.0</b> |
| Studies of dementia that used drugs prescriptions only                                                   | 0                        | 0.0          |
| Studies of dementia that used drugs prescriptions<br>Anticholinesterases                                 | 4                        | 14.8         |
| Dopaminergic drugs                                                                                       | 4                        | 14.8         |
|                                                                                                          | 4                        | 14.8         |
| <b>Pain</b>                                                                                              | <b>8</b>                 | <b>100.0</b> |
| Studies of pain that used drugs prescriptions only                                                       | 2                        | 25.0         |
| Studies of pain that used drugs prescriptions<br>Analgesics, not otherwise specified                     | 2                        | 25.0         |
| Antidepressants                                                                                          | 2                        | 25.0         |
| Anti-epileptics                                                                                          | 2                        | 25.0         |
| Anaesthetics                                                                                             | 2                        | 25.0         |
| <b>Sexual dysfunction (male)</b>                                                                         | <b>6</b>                 | <b>100.0</b> |
| Studies of sexual dysfunction that used drugs prescriptions only                                         | 1                        | 16.7         |
| Studies of sexual dysfunction that used drugs prescriptions<br>Phosphodiesterase type-5 inhibitors       | 3                        | 50.0         |
| Prostaglandin analogues and prostamides                                                                  | 2                        | 33.3         |
|                                                                                                          | 1                        | 16.7         |

**Table 4.** Methods and results of the validation of the outcomes reported in the original studies.

| Outcome and study authors                         | Validation method                                                                                 | # case validations completed/<br># case validations attempted | % of cases confirmed                                                                                                                                                  |
|---------------------------------------------------|---------------------------------------------------------------------------------------------------|---------------------------------------------------------------|-----------------------------------------------------------------------------------------------------------------------------------------------------------------------|
| <b>Anxiety</b>                                    |                                                                                                   |                                                               |                                                                                                                                                                       |
| Martin-Merino 2010                                | GP Questionnaire                                                                                  | 135/140                                                       | Among pharmacologically treated: 73.5%;<br>Among not pharmacologically treated: 89.6%.                                                                                |
| Meier 2004                                        | Record review                                                                                     | nr/nr                                                         | nr                                                                                                                                                                    |
| <b>Depression</b>                                 |                                                                                                   |                                                               |                                                                                                                                                                       |
| Becker, 2011                                      | Sensitivity analysis with different definitions                                                   | nr/nr                                                         | nr                                                                                                                                                                    |
| Hagberg, 2016                                     | Record review                                                                                     | nr/nr                                                         | nr                                                                                                                                                                    |
| Martin-Merino, 2010                               | GP questionnaire                                                                                  | 135/140                                                       | 89.6%                                                                                                                                                                 |
| Meier, 2004                                       | Record review                                                                                     | nr/nr                                                         | nr                                                                                                                                                                    |
| Yang, 2003                                        | Record review                                                                                     | 30/nr                                                         | 83.3%                                                                                                                                                                 |
| <b>Anxiety and depression (composite outcome)</b> |                                                                                                   |                                                               |                                                                                                                                                                       |
| John, 2016                                        | Compared 12 EHR algorithms to results of the Mental Health Inventory (MHI-5), a subscale of SF-36 | 2,799*                                                        | Between 61% and 76%, depending on the algorithm.                                                                                                                      |
| <b>Dementia/ cognitive impairment</b>             |                                                                                                   |                                                               |                                                                                                                                                                       |
| Imfeld, 2015 & Imfeld, 2013                       | GP questionnaire                                                                                  | nr/120                                                        | Alzheimer's disease: 79%;<br>Vascular dementia: 74%.                                                                                                                  |
| Dunn, 2005                                        | GP asked to confirm diagnosis                                                                     | 50/200                                                        | 100%                                                                                                                                                                  |
| Dunn, 2005                                        | GP questionnaire                                                                                  | 95/~100                                                       | 83%                                                                                                                                                                   |
| Strom, 2015                                       | GP questionnaire                                                                                  | 86/100                                                        | 88.4%                                                                                                                                                                 |
| Strom, 2015                                       | Review of free text                                                                               | 1047/1048                                                     | 1.5% patients excluded as not having the diagnosis; 42.4% confirmed as having definite memory loss, 36.8% possible memory loss, 3.2% undetermined, and 16.0% unknown. |
| <b>Pain</b>                                       |                                                                                                   |                                                               |                                                                                                                                                                       |
| Hall, 2013                                        | GP questionnaire                                                                                  | 48/54                                                         | 56%                                                                                                                                                                   |
| Mansfield, 2017                                   | EHR data linked to self-reported pain status collected by postal questionnaire                    | 1780*                                                         | 97%                                                                                                                                                                   |
| Becker, 2008                                      | GP questionnaire                                                                                  | 176/200                                                       | 86.4%                                                                                                                                                                 |

| Outcome and study authors                | Validation method                                                                                                                                                                   | # case validations completed/<br># case validations attempted | % of cases confirmed                                                                                  |
|------------------------------------------|-------------------------------------------------------------------------------------------------------------------------------------------------------------------------------------|---------------------------------------------------------------|-------------------------------------------------------------------------------------------------------|
| <b>Self-harm</b>                         |                                                                                                                                                                                     |                                                               |                                                                                                       |
| Thomas, 2012                             | Comparison of cases of suicide and self-harm identified in CPRD with Read codes, with the cases identified in CPRD data linked to HES data, and published self-harm incidence data. | 74236*                                                        | 68.4%                                                                                                 |
| <b>Suicide (attempted and completed)</b> |                                                                                                                                                                                     |                                                               |                                                                                                       |
| Hagberg, 2016                            | Record review                                                                                                                                                                       | nr/nr                                                         | nr                                                                                                    |
| Haste, 1998                              | GP asked to confirm suicides                                                                                                                                                        | 77% of uncertain deaths/nr                                    | 82%                                                                                                   |
| Jick, 1995                               | Record review                                                                                                                                                                       | nr/nr                                                         | nr                                                                                                    |
| Meier, 2004                              | Record review                                                                                                                                                                       | nr/nr                                                         | nr                                                                                                    |
| Schuerch, 2016                           | Outcomes identified in CPRD were compared to those identified in CPRD linked to HES and ONS data.                                                                                   | nr/nr                                                         | Compared to CPRD data, the frequency of the outcomes in linked data was approximately 3 times higher. |
| Yang, 2003                               | Record review                                                                                                                                                                       | 30/nr                                                         | 83.3%                                                                                                 |
| <b>Suicide (completed)</b>               |                                                                                                                                                                                     |                                                               |                                                                                                       |
| Arana, 2010                              | GP questionnaire and record review                                                                                                                                                  | nr/132                                                        | 97%                                                                                                   |
| Arana, 2010                              | GP questionnaire and record review                                                                                                                                                  | nr/86                                                         | 87%                                                                                                   |
| Hall, 2009                               | GP questionnaire and record review                                                                                                                                                  | 33/33                                                         | 21.2%                                                                                                 |
| Thomas, 2012                             | Comparison of cases of suicide and self-harm identified in CPRD with Read codes, with the cases identified in CPRD data linked to ONS mortality data, and national suicide rates.   | 1767*                                                         | 59.7% for men;<br>46.0% for women.                                                                    |

CPRD – Clinical Practice Research Datalink; EHR – electronic health records; GP – general practitioner; HES – Hospital Episode Statistics; nr – not reported; MHI-5 - Mental Health Inventory 5 items; ONS – Office for National Statistics; SF-36 – 36-item Short Form Health Survey.

\* Validation attempted and completed for all patients identified in electronic health records database.

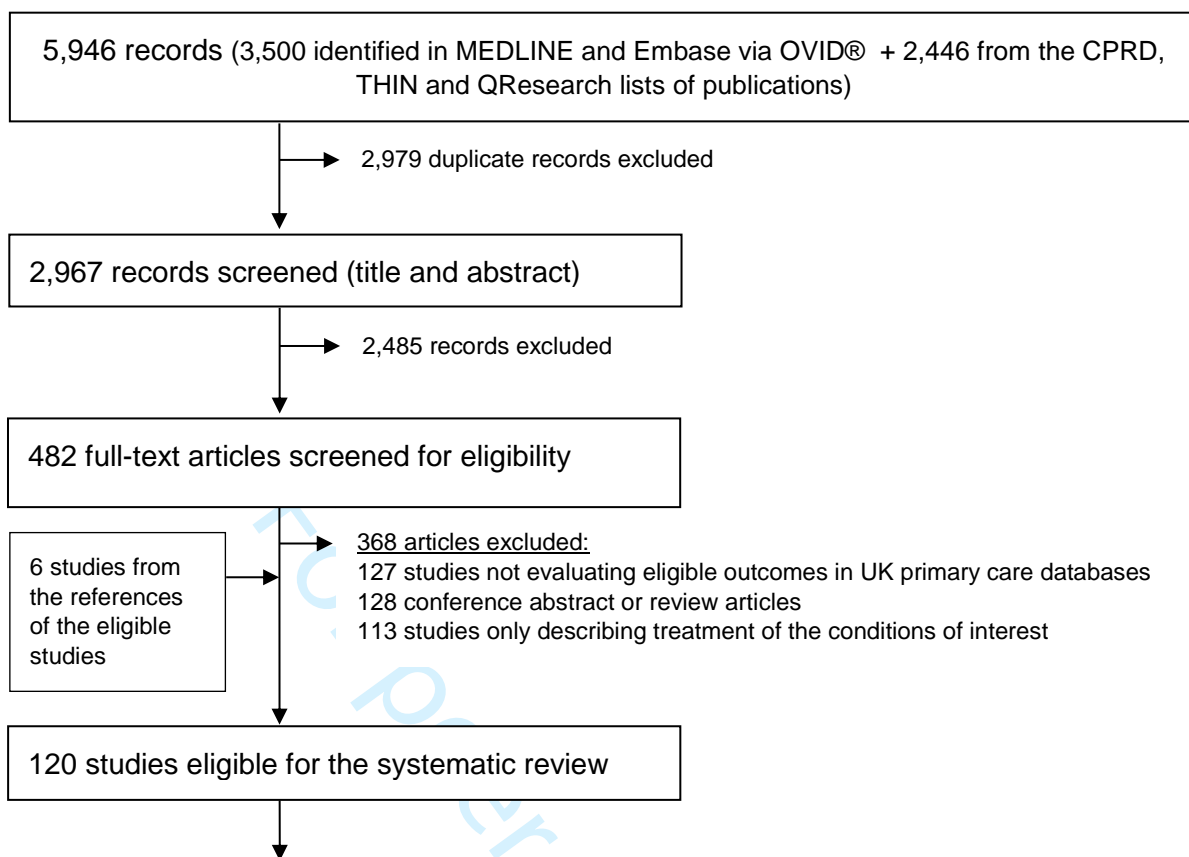

|                                            | Number of studies |
|--------------------------------------------|-------------------|
| Anxiety                                    | 12                |
| Depression                                 | 42                |
| Anxiety and depression (composite outcome) | 2                 |
| Dementia/ cognitive impairment             | 27                |
| Fatigue                                    | 6                 |
| Pain                                       | 8                 |
| Sexual dysfunction                         | 6                 |
| Sleep disorder                             | 2                 |
| Fatal and non-fatal self-harm              | 41                |

# Identification of mental disorders and quality of life outcomes in primary care databases in the United Kingdom: systematic review protocol

## Introduction

The number of studies conducted using electronic health records data largely increased in the last couple of decades. While these data sources are readily available and allow for studies to be conducted quicker than what it would be otherwise possible with prospective designs, this also raises questions about variables definitions using data that are collected with a primary purpose that is not research.

## Objective

To systematically review and summarise the strategies used to define such outcomes in previous studies, and the extent to which case definitions were validated.

## Methods

### Information sources

The following databases will be searched to identify potentially eligible studies:

- MEDLINE, via Ovid
- Embase, via Ovid
- CPRD, THIN and QResearch publications databases
- Reference lists of the eligible articles

### Search strategy

- Electronic databases: search expressions provided at the end of this document.
- CPRD list of publications: hand screening.
- Backwards citation tracking: hand screening.

### Outcomes of interest

- Anxiety
- Depression
- Fatigue
- Dementia
- Mild cognitive impairment
- Pain
- Female sexual dysfunction
- Sleep disorders
- Self-harm
- Suicide
- Composite outcomes of one or more of the above.

### Inclusion criteria

- Studies in which patients were selected from primary health care databases in the UK
- Studies where the outcome was one of the outcomes of interest for this review

### Exclusion criteria

- Conference abstracts, study protocols, or review articles
- Studies providing data only on the treatment of an eligible mental health outcome

### Selection process

The references will be screened in three consecutive phases by two researchers. In the first phase, the title and the abstract of each study will be read to determine their eligibility for the study by applied the pre-defined exclusion criteria. If the information provided in the title and abstract does not allow the unequivocal exclusion of the study, the full text will be considered. In the second phase, the full-text of each study considered eligible in the first phase will be obtained and read, in order to determine the eligibility considering all the information in the paper. If the list of codes is provided, the paper will be included in the review. Studies not providing the list of codes will be assessed in a third phase, where the corresponding author of the papers will be contacted by email and invited to provide the list of the search terms involved.

### Data extraction

The following data will be abstracted from the original reports, if available:

- Study design
- Adverse mental health outcome studied
- Database applied
- Use of linked data, and if yes, to which databases
- Type of codes used to define the condition (Read, ICD, OXMIS, etc.)
- Handling of previous disease episodes
- Availability of list of codes
- Medications used to define the conditions
- List of codes used to define the specific mental health outcome in the database
- Type of codes includes (symptoms, diagnoses, referrals, etc.)
- Validation of the list of codes used
- Results from the validation

### Study records

All records will be imported into EndNote X7. Duplicates will be manually removed.

A backup of the search expression applied and the records obtained from each database, as well as the date of last update and run, will be kept safe.

A record of excluded/included studies, with the respective motives, will be kept in Microsoft Office Excel.

### Data synthesis

Descriptive tables will be produced for each mental health outcome. The list of codes will be revised for sources of heterogeneity, and the results will be reported in text.



## Search expressions

### MEDLINE search expression, applied via OVID, 28 June 2018

1. CPRD.mp.
2. Clinical Practice Research.mp.
3. GPRD.mp.
4. General Practice Research Database.mp.
5. The Health Improvement Network.mp.
6. QRESEARCH.mp.
7. DIN-LINK.mp.
8. VAMP.mp.
9. Value Added Information Medical.mp.
10. (THIN adj1 (database or dataset or data)).mp.
11. (Read adj1 (term\* or code# or codification)).mp.
12. (diagnostic adj1 (term\* or code#)).mp.
13. Disease Analyzer.mp.
14. Primary care clinical informatics unit.mp.
15. PCCIU.mp.
16. (optimum patient care adj4 data\*).mp. [mp=title, abstract, original title, name of substance word, subject heading word, floating sub-heading word, keyword heading word, protocol supplementary concept word, rare disease supplementary concept word, unique identifier, synonyms]
17. OPCRDP.mp.
18. health information network.mp.
19. health improvement network.mp.
20. Q research.mp.
21. (ResearchOne or (Research One adj2 data\*)).mp. [mp=title, abstract, original title, name of substance word, subject heading word, floating sub-heading word, keyword heading word, protocol supplementary concept word, rare disease supplementary concept word, unique identifier, synonyms]
22. Doctors Independent Network.mp.
23. SAIL.mp.
24. (SAIL adj4 data\*).mp. [mp=title, abstract, original title, name of substance word, subject heading word, floating sub-heading word, keyword heading word, protocol supplementary concept word, rare disease supplementary concept word, unique identifier, synonyms]
25. mediplus.mp.
26. ((general practice or primary care or primary health care) adj4 data\*).mp.
27. longitudinal patient database.mp.
28. ((EHR or electronic health record\*) adj4 data\*).mp. [mp=title, abstract, original title, name of substance word, subject heading word, floating sub-heading word, keyword heading word, protocol supplementary concept word, rare disease supplementary concept word, unique identifier, synonyms]
29. health care database\*.mp.
30. exp "mental disorders"/
31. exp "behavior and behavior mechanisms"/
32. exp "behavioral disciplines and activities"/
33. exp Psychological Phenomena/
34. exp fatigue/
35. exp pain/
36. exp "Sleep Wake Disorders"/
37. exp central nervous system depressants/

38. exp muscle relaxants, central/
39. exp psychotropic drugs/
40. exp sleep aids, pharmaceutical/
41. (anxiety or anxious\* or panic or anxiolytic\* or (stress not oxidat\*) or depressi\* or dysthymia or antidepress\* or sexual or erectile or suicid\* or self-harm or hopeless\* or sleep or insomnia or hypnotic\* or cognit\* or chemo-fog or chemo-brain or pain or fatigue or (mental adj1 (disorder or disorders)) or antipsychotic).mp.
42. 30 or 31 or 32 or 33 or 34 or 35 or 36 or 37 or 38 or 39 or 40 or 41
43. exp United Kingdom/
44. (UK or Britain or British or England or English or Scotland or Scottish or Wales or Welsh Ireland).mp.
45. 43 or 44
46. or/1-29
47. 42 and 45 and 46

### **EMBASE search expression, applied via OVID, 28 June 2018**

1. CPRD.mp.
2. Clinical Practice Research.mp.
3. GPRD.mp.
4. General Practice Research Database.mp.
5. The Health Improvement Network.mp.
6. QRESEARCH.mp.
7. DIN-LINK.mp.
8. VAMP.mp.
9. Value Added Information Medical.mp.
10. (THIN adj1 (database or dataset or data)).mp.
11. (Read adj1 (term\* or code# or codification)).mp.
12. (diagnostic adj1 (term\* or code#)).mp.
13. Disease Analyzer.mp.
14. Primary care clinical informatics unit.mp.
15. PCCIU.mp.
16. (optimum patient care adj4 data\*).mp.
17. OPCRD.mp.
18. health information network.mp.
19. health improvement network.mp.
20. Q research.mp.
21. (ResearchOne or (Research One adj2 data\*)).mp.
22. Doctors Independent Network.mp.
23. SAIL.mp.
24. (SAIL adj4 data\*).mp.
25. mediplus.mp.
26. ((general practice or primary care or primary health care) adj4 data\*).mp.
27. longitudinal patient database.mp.
28. ((EHR or eletronic health record\*) adj4 data\*).mp.
29. health care database\*.mp.
30. or/1-29
31. UK.mp.
32. United Kingdom.mp.
33. England.mp.
34. Wales.mp.
35. Scotland.mp.
36. Northern Ireland.mp.

- 1
- 2
- 3 37. 31 or 32 or 33 or 34 or 35 or 36
- 4 38. exp central depressant agent/
- 5 39. exp central muscle relaxant/
- 6 40. exp psychotropic agent/
- 7 41. antidepress\*.mp.
- 8 42. antipsychotic.mp.
- 9 43. anxiolytic.mp.
- 10 44. exp mental capacity/ or exp mental compliance/ or exp mental concentration/ or exp
- 11 mental deficiency/ or exp mental deterioration/ or exp mental development/ or exp mental
- 12 development assessment/ or exp mental disease/ or exp mental disease assessment/ or exp
- 13 mental dissociation/ or mental function/ or exp mental health/ or exp mental health care/ or
- 14 exp mental health center/ or exp mental health organization/ or exp mental health research/
- 15 or exp mental health service/ or exp mental hospital/ or exp mental stress/
- 16 45. depressi\*.mp.
- 17 46. dysthymia.mp.
- 18 47. catatonia.mp.
- 19 48. self-injur\*.mp.
- 20 49. self injury.mp.
- 21 50. self mutilation.mp.
- 22 51. suicid\*.mp.
- 23 52. self-harm.mp.
- 24 53. anxious\*.mp.
- 25 54. anxiety.mp.
- 26 55. panic.mp.
- 27 56. catastrophi\*.mp.
- 28 57. phobia.mp.
- 29 58. phobic.mp.
- 30 59. neurotic.mp.
- 31 60. compulsive.mp.
- 32 61. bipolar.mp.
- 33 62. neurotic.mp.
- 34 63. personality.mp.
- 35 64. psychotic.mp.
- 36 65. psychosis.mp.
- 37 66. paranoid.mp.
- 38 67. delusional.mp.
- 39 68. sexual.mp.
- 40 69. insomnia.mp.
- 41 70. exp insomnia/
- 42 71. exp sleep/ or exp sleep disorder/
- 43 72. exp somatoform disorder/
- 44 73. exp substance abuse/ or exp "substance use"/
- 45 74. exp stress/
- 46 75. or/38-74
- 47 76. 30 and 37 and 75
- 48
- 49
- 50
- 51
- 52
- 53
- 54
- 55
- 56
- 57
- 58
- 59
- 60

### Changes from the protocol with justification

The protocol specified that only female sexual dysfunction was of interest because this review is part of a PhD on women with a history of breast cancer. During the process of conducting the review, however, we decided to drop the gender restriction, as the review would be of more general use as a standalone publication.

For peer review only

1  
2  
3 **Appendix 2. Template email sent to corresponding authors of the studies for which a**  
4 **list of codes wasn't provided in the publication.**  
5  
6  
7  
8  
9

10 Dear [corresponding author],  
11  
12

13 I'm currently doing a PhD about mental health and quality of life in breast cancer survivors.  
14 As part of my PhD, I'm conducting a systematic review of the studies that assessed mental  
15 health outcomes using electronic health records. The aim of the review is to summarise how  
16 studies have identified these outcomes in primary care databases in the UK; the review will  
17 be part of my PhD thesis and we are also planning to publish it in a peer-reviewed journal in  
18 due course.  
19  
20  
21  
22

23 I'm writing to you because a study in which you are the corresponding author was identified  
24 as eligible (please see title below), and I would kindly ask if you could be of assistance with  
25 the issues described below.  
26  
27  
28

29 [title]

30 [description of the list of codes needed]  
31  
32  
33

34 I look forward to hearing from you and thank you in advance for your help.  
35  
36

37 Best wishes,  
38

39 Helena  
40  
41  
42  
43  
44  
45  
46  
47  
48  
49  
50  
51  
52  
53  
54  
55  
56  
57  
58  
59  
60

Table 1. Main characteristics of the eligible studies: anxiety.

| Author, year of publication | Study title                                                                                                                                                        | Type of study        | Database(s) | Study period (years) | Outcome description                                                                                                                                                                     | List of codes available | Validation of list of codes | EHR-related eligibility criteria for the study // Follow up requirements                                                                                                                           | Handling of outcomes occurring prior to exposure                                                                     | Notes                                                                               |
|-----------------------------|--------------------------------------------------------------------------------------------------------------------------------------------------------------------|----------------------|-------------|----------------------|-----------------------------------------------------------------------------------------------------------------------------------------------------------------------------------------|-------------------------|-----------------------------|----------------------------------------------------------------------------------------------------------------------------------------------------------------------------------------------------|----------------------------------------------------------------------------------------------------------------------|-------------------------------------------------------------------------------------|
| Bouras, 2016 [1]            | Linked and primary care database analysis of the incidence and impact of psychiatric morbidity following gastrointestinal cancer surgery in England                | Cohort study         | CPRD, HES   | 1997-2012            | "Diagnosis code [for anxiety] in CPRD or HES, or a prescription code [for Diazepam or Lorazepam] between 36 months before and 12 months after surgery."                                 | Yes                     | None stated                 | Data available for >3 years before the index date // Follow up duration: 1 year after index date                                                                                                   | Study quantified the psychiatric morbidity before and after the index date.                                          | -                                                                                   |
| Fardet, 2012 [2]            | Suicidal behavior and severe neuropsychiatric disorders following glucocorticoid therapy in primary care                                                           | Cohort study         | THIN        | 1990-2008            | Read and Multilex list of codes for diagnoses of panic disorder or panic attack <u>excluding</u> codes for anxiety                                                                      | No                      | None stated                 | ≥6 months of registration with the primary care practice                                                                                                                                           | Hazards ratios adjusted for past history of neuropsychiatric disorders (yes/no)                                      | Outcome was eligible if there was no record of the outcome in the previous 6 months |
| Granerod, 2016 [3]          | Increased rates of sequelae post-encephalitis in individuals attending primary care practices in the United Kingdom: a population-based retrospective cohort study | Cohort study         | CPRD        | 1998-2012            | "Anxiety disorders (including both symptom codes and diagnoses such as generalised anxiety disorder, panic disorder, post-traumatic stress disorder and obsessive compulsive disorder)" | Yes                     | None stated                 | None stated // At least one contact with the GP practice in the two years after the index date                                                                                                     | Analysis restricted to those at risk of a new-onset outcome, defined as no code in the year prior to the index date. | -                                                                                   |
| Hesdorffer, 2012 [4]        | Epilepsy, suicidality, and psychiatric disorders: a bidirectional association                                                                                      | Matched cohort study | CPRD        | 1990-2008            | Anxiety, not further specified                                                                                                                                                          | No                      | None stated                 | At least 3 years of data before the index date, 1 year after the index date, and at least 1 code for a medical or drug code in the 6 months before the index // Follow up 3 years after index date | Excluded subjects with a record of the outcome before the study date.                                                | -                                                                                   |

| Author, year of publication | Study title                                                                                                               | Type of study             | Database(s) | Study period (years) | Outcome description                                                                                                                                                                                                        | List of codes available                                 | Validation of list of codes         | EHR-related eligibility criteria for the study // Follow up requirements                                                                                                                                            | Handling of outcomes occurring prior to exposure                                                                                                         | Notes                                                                      |
|-----------------------------|---------------------------------------------------------------------------------------------------------------------------|---------------------------|-------------|----------------------|----------------------------------------------------------------------------------------------------------------------------------------------------------------------------------------------------------------------------|---------------------------------------------------------|-------------------------------------|---------------------------------------------------------------------------------------------------------------------------------------------------------------------------------------------------------------------|----------------------------------------------------------------------------------------------------------------------------------------------------------|----------------------------------------------------------------------------|
| Khan, 2010 [5]              | Consulting and prescribing behaviour for anxiety and depression in long-term survivors of cancer in the UK                | Cohort study              | CPRD        | 2003-2006            | Consultations for anxiety and prescriptions of benzodiazepines and Buspirone                                                                                                                                               | No                                                      | None stated                         | None stated                                                                                                                                                                                                         | History of anxiety prior to the analysis period included in the models                                                                                   | Outcomes occurred within a 3-year period chosen for the study              |
| Kurd, 2005 [6]              | The risk of depression, anxiety, and suicidality in patients with psoriasis: A population-based cohort study              | Cohort study              | CPRD        | 1987-2002            | "clinician diagnosis of anxiety and related disorders in which anxiety symptoms are common"                                                                                                                                | No<br>(refers using the same codes of previous studies) | None stated                         | None stated                                                                                                                                                                                                         | Patients with history of anxiety in the 6 months before the index date were excluded in a sensitivity analysis.                                          | -                                                                          |
| Lurie, 2015 [7]             | Antibiotic exposure and the risk for depression, anxiety, or psychosis: A nested case-control study                       | Nested case control study | THIN        | 1995-2013            | Anxiety, including codes for diagnosis of generalised anxiety disorder and phobic anxiety                                                                                                                                  | Yes                                                     | None stated                         | Only records from patients that had been registered with the GP for more than 183 days // Outcomes were considered incident if occurring at more than 183 days after the index date.                                | Patients who had pharmacological treatment for a specific psychiatric diagnosis more than 90 days before the diagnosis was first recorded were excluded. | Patients with mixed anxiety and depression were excluded from the analysis |
| Martin-Merino, 2010 [8]     | Prevalence, incidence, morbidity and treatment patterns in a cohort of patients diagnosed with anxiety in UK primary care | Cohort study              | THIN        | 2002-2004            | "Identification codes included all Read codes describing anxiety. These included codes ranging from mild anxiousness symptoms to other disorders such as phobia, panic attack and generalized and mixed anxiety disorders" | Yes                                                     | Yes<br>Record review/questionnaires | Enrolled for at least 2 years with the practice and have received one prescription in the previous year; patients aged $\geq 70$ years had to have at least 2 visits registered in the follow up period of >1 year. | Patients with previous anxiety diagnoses were excluded, as well as those who had 5 or more prescriptions of anxiolytics before the diagnosis.            | -                                                                          |

| Author, year of publication | Study title                                                                                                                                       | Type of study             | Database(s) | Study period (years) | Outcome description                                                                                                 | List of codes available | Validation of list of codes                                                | EHR-related eligibility criteria for the study // Follow up requirements                                                                                                                      | Handling of outcomes occurring prior to exposure                                                                                | Notes                                          |
|-----------------------------|---------------------------------------------------------------------------------------------------------------------------------------------------|---------------------------|-------------|----------------------|---------------------------------------------------------------------------------------------------------------------|-------------------------|----------------------------------------------------------------------------|-----------------------------------------------------------------------------------------------------------------------------------------------------------------------------------------------|---------------------------------------------------------------------------------------------------------------------------------|------------------------------------------------|
| Meier, 2004 [9]             | The risk of severe depression, psychosis or panic attacks with prophylactic antimalarials                                                         | Cohort study              | CPRD        | 1990-1999            | First time diagnosis of panic attack, regardless of referral or treatment, identified by OXMIS- and/or- ICD-8-codes | No                      | Yes<br><br>'reviewed a list of all cases to determine inclusion/exclusion' | ≥1 year of data available before index date and "some GPRD activity (diagnoses or prescriptions) recorded after the index date"<br>//<br>Patients were censored 18 months after exposure date | "The base population for person-time analyses consisted of all subjects free of (...) panic attacks at the start of follow up." | -                                              |
| Schneider, 2013 [10]        | Antimalarial chemoprophylaxis and the risk of neuropsychiatric disorders                                                                          | Nested case control study | CPRD        | 2001-2009            | Incident diagnosis of anxiety, not further specified                                                                | No                      | None stated                                                                | At least 1 year of date before the index date<br>//<br>some activity (diagnoses or prescriptions) recorded after the index date                                                               | Excluded patients with the outcome of interest observed before the index date                                                   | -                                              |
| Sheehan, 2015 [11]          | Mental illness, challenging behaviour, and psychotropic drug prescribing in people with intellectual disability: UK population based cohort study | Cohort study              | THIN        | 1999-2013            | Anxiety, including codes for symptoms and diagnoses                                                                 | Yes                     | None stated                                                                | Entry in the cohort at least one year after registration with the practice                                                                                                                    | None stated                                                                                                                     | Excludes cases of mixed anxiety and depression |



1  
2  
3  
4  
5  
6  
7  
8  
9  
10  
11  
12  
13  
14  
15  
16  
17  
18  
19  
20  
21  
22  
23  
24  
25  
26  
27  
28  
29  
30  
31  
32  
33  
34  
35  
36  
37  
38  
39  
40  
41  
42  
43  
44  
45  
46

| Author, year of publication | Study title                                                                      | Type of study | Database(s) | Study period (years) | Outcome description                                                                                                                                                                                                                                                                                                                                                       | List of codes available | Validation of list of codes | EHR-related eligibility criteria for the study // Follow up requirements                                                                                                                                                                                                                                          | Handling of outcomes occurring prior to exposure                           | Notes                                                                                                                              |
|-----------------------------|----------------------------------------------------------------------------------|---------------|-------------|----------------------|---------------------------------------------------------------------------------------------------------------------------------------------------------------------------------------------------------------------------------------------------------------------------------------------------------------------------------------------------------------------------|-------------------------|-----------------------------|-------------------------------------------------------------------------------------------------------------------------------------------------------------------------------------------------------------------------------------------------------------------------------------------------------------------|----------------------------------------------------------------------------|------------------------------------------------------------------------------------------------------------------------------------|
| Walters, 2012 [12]          | Recent trends in the incidence of anxiety diagnoses and symptoms in primary care | Cohort study  | THIN        | 1998-2008            | Anxiety, including symptoms, diagnosis, mixed anxiety and depression, panic attacks and panic disorder<br><br>Results were also provided separately for:<br>- anxiety disorders (eg. chronic anxiety, generalised anxiety disorder, anxiety state);<br>- anxiety symptoms (e.g. 'anxiousness');<br>- mixed anxiety and depression;<br>- panic attacks and panic disorder. | No                      | None stated                 | ≥1 year of data since registration with the practice and 'consistent recording of at least one medical record (e.g. a diagnostic entry), one additional health data record (e.g. blood test result) and >1 prescriptions on average for the practice per patient per year and consistent reporting of mortality.' | Excluded patients with an entry for anxiety recorded in the previous year. | Participants could have had more than one episode during the follow up, provided that they were separated for more than 12 months. |

CPRD – Clinical Practice Research Datalink; HES – Hospital Episodes Statistics; ICD-10 – International Classification of Diseases, edition 10; ND – not defined; OXMIS – Oxford Medical Information System; PCCIU – Primary Care Clinical Informatics Unit Research; THIN – The Health Improvement Network.

Pre-view only

Table 2. Main characteristics of the eligible studies: depression.

| Author, year of publication | Study title                                                                                             | Type of study                            | Database(s) | Study period (years) | Outcome description                                                                                                                                                                                                                                                                           | List of codes available | Validation of list of codes | EHR-related eligibility criteria for the study // Follow up requirements    | Handling of outcomes occurring prior to exposure                                                                                                                       | Notes                                                                                                                      |
|-----------------------------|---------------------------------------------------------------------------------------------------------|------------------------------------------|-------------|----------------------|-----------------------------------------------------------------------------------------------------------------------------------------------------------------------------------------------------------------------------------------------------------------------------------------------|-------------------------|-----------------------------|-----------------------------------------------------------------------------|------------------------------------------------------------------------------------------------------------------------------------------------------------------------|----------------------------------------------------------------------------------------------------------------------------|
| Becker, 2011 [13]           | Risk of incident depression in patients with Parkinson disease in the UK                                | Nested case-control study                | CPRD        | 1994-2005            | 'To be included in the analysis as a valid depression case, a patient had to have a code recorded for an affective disorder (depression, manic disorders, bipolar disorders, or unspecified affective disorders) during follow-up.'                                                           | Yes                     | Yes                         | At least 3 years of computer EHR prior to the index date // None stated.    | Cases who had depression diagnosed prior to the index date were excluded;                                                                                              | -                                                                                                                          |
| Booth, 2015 [14]            | Impact of bariatric surgery on clinical depression. Interrupted time series study with matched controls | Controlled interrupted time-series study | CPRD        | 2000-2012            | Clinical depression was identified through medical diagnoses for depression recorded in clinical or referral records as well as through prescriptions for anti-depressant drugs.                                                                                                              | Yes                     | None stated                 | At least one year of registration with the practice prior to the index date | Not applicable                                                                                                                                                         | -                                                                                                                          |
| Bornand, 2016 [15]          | The risk of new onset depression in association with influenza - A population-based observational study | Nested case-control study                | CPRD        | 2000-2013            | Minimum of three prescriptions for one or more antidepressant drugs recorded after the incident major depression diagnosis (i.e. the index date), identified by READ-codes based on ICD-10 codes (F32), if they started the antidepressant therapy within 90 days of the depression diagnosis | Yes                     | None stated                 | A minimum of three years of history before the index date.                  | Excluded patients with more than two prescriptions for antidepressants at any time prior to the index date. Adjusted for history of affective disorders in the models. | Provides data for depression severity: general depression; mild depression; moderate depression; severe depression; other. |

1

2

| 3 Author,<br>4 year of<br>5 publication | 6 Title                                                  | 7 Study title                                                                                                                                                                                             | 8 Type of study                     | 9 Database(s)     | 10 Study<br>11 period<br>12 (years) | 13 Outcome description                                                                                                                                                                                                                                                                                                                                                                                                                                             | 14 List of<br>15 codes<br>16 available | 17 Validation<br>18 of list of<br>19 codes | 20 EHR-related<br>21 eligibility<br>22 criteria<br>23 for the study<br>24 //<br>25 Follow up<br>26 requirements                                                                                   | 27 Handling of<br>28 outcomes<br>29 occurring prior<br>30 to exposure         | 31 Notes                                                                                                               |
|-----------------------------------------|----------------------------------------------------------|-----------------------------------------------------------------------------------------------------------------------------------------------------------------------------------------------------------|-------------------------------------|-------------------|-------------------------------------|--------------------------------------------------------------------------------------------------------------------------------------------------------------------------------------------------------------------------------------------------------------------------------------------------------------------------------------------------------------------------------------------------------------------------------------------------------------------|----------------------------------------|--------------------------------------------|---------------------------------------------------------------------------------------------------------------------------------------------------------------------------------------------------|-------------------------------------------------------------------------------|------------------------------------------------------------------------------------------------------------------------|
| 8 Bouras,<br>9 2016 [1]                 | 10<br>11<br>12<br>13<br>14<br>15<br>16<br>17             | 18 Linked Hospital and<br>19 Primary Care Database<br>20 Analysis of the<br>21 Incidence and Impact of<br>22 Psychiatric Morbidity<br>23 Following<br>24 Gastrointestinal Cancer<br>25 Surgery in England | 26 Cohort study                     | 27 CPRD<br>28 HES | 29 1997-2012                        | 30 "Codes for the diagnoses of (...) depression were measured in CPRD (...) In HES, ICD-10 codes recorded in the first position of a hospital episode (signifying the main condition treated) for the diagnoses of depression. (...) Prescription data (...) including antidepressants (Fluoxetine, Paroxetine, Sertraline, Citalopram, Escitalopram, Mirtazapine, and Venlafaxine), (...) anxiolytics (Diazepam and Lorazepam)."                                  | 31 Yes                                 | 32 None<br>33 stated                       | 34 Data available for<br>35 >3 years before<br>36 the study index<br>37 date<br>38 //<br>39 Follow up<br>40 duration: 1 year<br>41 post diagnosis                                                 | 42 Not applicable                                                             | 43 -                                                                                                                   |
| 18 Claxton,<br>19 2000 [16]             | 20<br>21<br>22<br>23<br>24<br>25<br>26<br>27<br>28<br>29 | 30 Selective serotonin<br>31 reuptake inhibitor<br>32 treatment in the UK:<br>33 Risk of relapse or<br>34 recurrence of<br>35 depression                                                                  | 36 Cohort study                     | 37 MediPlus       | 38 1993-1995                        | 39 Re-initiation of any antidepressant after a gap of at least 6 months with no antidepressant prescription; suicide attempt, referral to psychotherapy or psychiatrist, admission to a mental health facility, emergency room use related to mental disorders, or electroconvulsive therapy and re-initiation of antidepressant one of the above.<br><br>40 Depression first defined as treatment with a SSRI and a Read code within 1 month of the prescription. | 41 Yes                                 | 42 None<br>43 stated                       | 44 Only patients with<br>45 contact with the<br>46 services during the<br>47 previous 2 years of<br>48 the index date;<br>49 //<br>50 Follow up duration<br>51 of 18 months post<br>52 index date | 53 Not applicable<br>54 (all patients had<br>55 been treated<br>56 with SSRI) | 57 Patients<br>58 dementia,<br>59 schizophrenia,<br>60 psychosis and<br>61 manic<br>62 depression were<br>63 excluded. |
| 30 Cliford,<br>31 2002 [17]             | 32<br>33<br>34<br>35                                     | 36 Drug or symptom-<br>37 induced depression in<br>38 men treated with alpha1-<br>39 blockers for benign<br>40 prostatic hyperplasia? A<br>41 nested-case control<br>42 study                             | 43 Nested case-<br>44 control study | 45 CPRD           | 46 1992-1999                        | 47 Proxy of antidepressant prescription (first prescription of antidepressant)                                                                                                                                                                                                                                                                                                                                                                                     | 48 No                                  | 49 None<br>50 stated                       | 51 Registered in<br>52 CPRD for at least<br>53 12 months<br>54 //<br>55 ND                                                                                                                        | 56 None stated                                                                | 57 -                                                                                                                   |

36

37

38

39

40

41

42

43

44

45

46

1  
2

| 3Author,<br>4year of<br>5publication | 6Title                                                                                                                         | 7Study title   | 8Type of study | 9Database(s) | 10Study period<br>(years)                                                                                                                                                                                                                                                                                                                                                                                                                                                                                                                                                                                                                                               | 11Outcome description               | 12List of<br>13codes<br>14available | 15Validation<br>16of list of<br>17codes                            | 18EHR-related<br>19eligibility criteria<br>20for the study<br>21//<br>22Follow up<br>23requirements | 24Handling of<br>25outcomes<br>26occurring prior<br>27to exposure                                  | 28Notes |
|--------------------------------------|--------------------------------------------------------------------------------------------------------------------------------|----------------|----------------|--------------|-------------------------------------------------------------------------------------------------------------------------------------------------------------------------------------------------------------------------------------------------------------------------------------------------------------------------------------------------------------------------------------------------------------------------------------------------------------------------------------------------------------------------------------------------------------------------------------------------------------------------------------------------------------------------|-------------------------------------|-------------------------------------|--------------------------------------------------------------------|-----------------------------------------------------------------------------------------------------|----------------------------------------------------------------------------------------------------|---------|
| 8Dave, 2010<br>9[18]                 | 10Incidence of Maternal<br>11and Paternal Depression<br>12in Primary Care                                                      | 13Cohort study | 14THIN         | 151993-2007  | 16“Read code entry for unipolar<br>17depression and/or a prescription for<br>18an antidepressant at the appropriate<br>19therapeutic dose for treatment of<br>20depression on a given consultation<br>21date (...) we eliminated those who<br>22had an entry for anxiety or panic<br>23disorder but had no entry for<br>24depression in their entire<br>25computerized medical record.”                                                                                                                                                                                                                                                                                 | 26No<br>27Available on<br>28request | 29None<br>30stated                  | 31None stated                                                      | 32Results stratified<br>33by history of<br>34previous mental<br>35disorder                          | 36Mixed anxiety<br>37and depression<br>38was included.                                             |         |
| 39Fardet, 2012<br>40[2]              | 41Suicidal behavior and<br>42severe neuropsychiatric<br>43disorders following<br>44glucocorticoid therapy in<br>45primary care | 46Cohort study | THIN           | 1990-2008    | ‘Read code for unipolar depression,<br>for symptoms of depression, or for a<br>prescription for an antidepressant.<br>Diagnoses were considered first;<br>prescriptions of antidepressants<br>were used in defining the outcome<br>only when there was no recorded<br>diagnosis of a neuropsychiatric<br>illness and no other recorded<br>indication for the prescription. To<br>exclude patients who may have<br>received prescriptions for<br>antidepressants for anxiety rather<br>than for depression, we eliminated<br>those who had an entry for anxiety<br>or panic disorder but had no entry<br>for depression in their entire<br>computerized medical record.’ | No                                  | None<br>stated                      | ≥6 months of<br>registration with<br>the primary care<br>practice. | Hazards ratios<br>adjusted for past<br>history of<br>neuropsychiatric<br>disorders<br>(yes/no)      | Outcome was<br>eligible if there<br>was no record of<br>the outcome in<br>the previous 6<br>months |         |

1  
2  
3  
4  
5  
6  
7  
8  
9  
10  
11  
12  
13  
14  
15  
16  
17  
18  
19  
20  
21  
22  
23  
24  
25  
26  
27  
28  
29  
30  
31  
32  
33  
34  
35  
36  
37  
38  
39  
40  
41  
42  
43  
44  
45  
46

| Author, year of publication | Study title                                                                                                                                                                                                                                                | Type of study             | Database(s) | Study period (years) | Outcome description                                                                                                         | List of codes available | Validation of list of codes | EHR-related eligibility criteria for the study // Follow up requirements                        | Handling of outcomes occurring prior to exposure                                                                                                                                  | Notes |
|-----------------------------|------------------------------------------------------------------------------------------------------------------------------------------------------------------------------------------------------------------------------------------------------------|---------------------------|-------------|----------------------|-----------------------------------------------------------------------------------------------------------------------------|-------------------------|-----------------------------|-------------------------------------------------------------------------------------------------|-----------------------------------------------------------------------------------------------------------------------------------------------------------------------------------|-------|
| Gunnell, 2009 [19]          | Varenicline and suicidal behaviour: a cohort study based on data from the General Practice Research Database                                                                                                                                               | Cohort study              | CPRD        | 2006-2008            | Depression defined as the start of antidepressant therapy                                                                   | No                      | None stated                 | At least 1 years of CPRD record before index date // ND                                         | People who had been prescribed an antidepressant within the previous 6 months before index date were excluded. Previous psychiatric consultations considered in the models.       | -     |
| Granerod, 2016 [3]          | Increased rates of sequelae post-encephalitis in individuals attending primary care practices in the United Kingdom: a population-based retrospective cohort study                                                                                         | Matched cohort study      | CPRD        | 1998-2012            | Depression, consisting of codes for depression diagnosis and symptoms if evidence of pharmacological treatment was present. | Yes                     | None stated                 | None stated // At least one contact with the GP practice in the two years after the index date. | Analysis restricted to those at risk of a new-onset outcome, defined as no code in the year prior to the index date.                                                              | -     |
| Hagberg, 2017 [20]          | Risk of Incident Antidepressant-Treated Depression Associated with Use of 5alpha-Reductase Inhibitors Compared with Use of alpha-Blockers in Men with Benign Prostatic Hyperplasia: A Population-Based Study Using the Clinical Practice Research Datalink | Nested case-control study | CPRD        | 1992-2013            | A Read code for a depression diagnosis and a prescription for an antidepressant within 90 days of the depression diagnosis. | No                      | None stated                 | At least 1 year of recorded history in the database before cohort entry;                        | Excluded men with a diagnosis of depression or suicidal behaviors (ideation or attempts), or men who received prescriptions for antidepressant medications prior to cohort entry. | -     |

1  
2

| 3 Author,<br>4 year of<br>5 publication | 6 Title | 7 Study title                                                                                                                                                  | Type of study                | Database(s) | Study period (years) | Outcome description                                                                                                                                                                                                                                                                                                                                                             | List of codes available | Validation of list of codes | EHR-related eligibility criteria for the study // Follow up requirements                                                                                                                                          | Handling of outcomes occurring prior to exposure                                                                                                                                         | Notes                                                                             |
|-----------------------------------------|---------|----------------------------------------------------------------------------------------------------------------------------------------------------------------|------------------------------|-------------|----------------------|---------------------------------------------------------------------------------------------------------------------------------------------------------------------------------------------------------------------------------------------------------------------------------------------------------------------------------------------------------------------------------|-------------------------|-----------------------------|-------------------------------------------------------------------------------------------------------------------------------------------------------------------------------------------------------------------|------------------------------------------------------------------------------------------------------------------------------------------------------------------------------------------|-----------------------------------------------------------------------------------|
| 8 Hagberg, 2016 [21]                    | 9       | 10 Incidence rates of suicidal behaviors and treated depression in patients with and without psoriatic arthritis using the Clinical Practice Research Datalink | 11 Nested case control study | 12 CPRD     | 13 1998-2012         | 14 'A patient was required to have at least one prescription for an antidepressant drug in addition to a diagnosis code for depression within 60 days of each other to qualify as a case of treated depression.'                                                                                                                                                                | 15 No                   | 16 Yes, record review       | 17 At least one year of registration with the practice prior to the index date                                                                                                                                    | 18 Any patient who had a diagnosis of depression or a prescription for an antidepressant drug recorded before the cohort entry date was excluded from the Treated Depression sub-cohort. | 19 -                                                                              |
| 20 Harris, 2011 [22]                    | 21      | 22 Depression indicators in a national sample of older community and care home patients: applying the Quality and Outcomes Framework                           | 23 Cohort study              | 24 THIN     | 25 ND-2008           | 26 (i) depression case finding with assessment tool validated for primary care; (ii) assessment of depression severity in patients with a new depression episode.<br><br>27 'Quality and Outcomes Framework Read Codes were used in both cases, but no account was taken of exceptions recorded by GPs, as these may bias comparisons between community and care home samples.' | 28 Yes                  | 29 None stated              | 30 Patients registered for at least 90 days with a new diagnosis of depression in period 91-450 days from end of follow up and no depression severity assessment >365 days before end of follow up.               | 31 Not applicable                                                                                                                                                                        | 32 Only practices contributing with data up to at least March 2008 were included. |
| 33 Hesdorffer, 2012 [4]                 | 34      | 35 Epilepsy, suicidality, and psychiatric disorders: a bidirectional association                                                                               | 36 Matched cohort study      | 37 CPRD     | 38 1990-2008         | 39 Incident major depression, not further specified                                                                                                                                                                                                                                                                                                                             | 40 No                   | 41 None stated              | 42 At least 3 years of data before the index date, 1 year after the index date, and at least 1 code for a medical or drug code in the 6 months before the index<br>43 //<br>44 Follow up 3 years after index date | 45 Excluded subjects with a record of the outcome before the study date.                                                                                                                 | 46 -                                                                              |

1  
2

| 3<br>4<br>5<br>6<br>7                                                      | Author,<br>year of<br>publication | Study title                                                                                                                             | Type of study           | Database(s)                                         | Study<br>period<br>(years) | Outcome description                                                                                                                                                                                                                                                                                                                                                                                                                                                                          | List of<br>codes<br>available | Validation<br>of list of<br>codes | EHR-related<br>eligibility<br>criteria<br>for the study<br>//<br>Follow up<br>requirements | Handling of<br>outcomes<br>occurring prior<br>to exposure                                                               | Notes |
|----------------------------------------------------------------------------|-----------------------------------|-----------------------------------------------------------------------------------------------------------------------------------------|-------------------------|-----------------------------------------------------|----------------------------|----------------------------------------------------------------------------------------------------------------------------------------------------------------------------------------------------------------------------------------------------------------------------------------------------------------------------------------------------------------------------------------------------------------------------------------------------------------------------------------------|-------------------------------|-----------------------------------|--------------------------------------------------------------------------------------------|-------------------------------------------------------------------------------------------------------------------------|-------|
| 8<br>9<br>10<br>11<br>12<br>13<br>14<br>15<br>16                           | Jacob, 2017<br>[23]               | Depression Risk in<br>Patients with<br>Rheumatoid Arthritis in<br>the United Kingdom                                                    | Cohort study            | Disease<br>Analyser<br>database                     | 2000-2014                  | Diagnoses of depression, according<br>to the ICD-10 codes                                                                                                                                                                                                                                                                                                                                                                                                                                    | No                            | None<br>stated                    | None stated<br>//<br>Incidence in the<br>first 5 years of the<br>index date                | None stated                                                                                                             | -     |
| 17<br>18<br>19<br>20<br>21<br>22<br>23<br>24<br>25<br>26<br>27<br>28<br>29 | Jenkins-<br>Jones, 2018<br>[24]   | Poor compliance and<br>increased mortality,<br>depression and<br>healthcare costs in<br>patients with congenital<br>adrenal hyperplasia | Matched cohort<br>study | CPRD,<br>ONS,<br>HES<br>inpatient and<br>outpatient | ?                          | Depression defined by Read Codes<br>in CPRD, by ICD-10 code in HES<br>inpatient data, or by the prescription<br>of antidepressants.<br><br>Depression was identified not only<br>from ongoing records but also from<br>patients' clinical histories dating from<br>before the start of data follow-up.<br><br>A sensitivity analysis considered<br>only those depression outcomes<br>identified by both diagnostic (Read<br>or ICD-10) code and at least one<br>antidepressant prescription. | Yes                           | None<br>stated                    | None stated                                                                                | Not applicable:<br>the outcome<br>was lifetime<br>prevalence of<br>depression<br>rather than<br>incident<br>occurrence. | -     |

30  
31  
32  
33  
34  
35  
36  
37  
38  
39  
40  
41  
42  
43  
44  
45  
46

1  
2  
3  
4  
5  
6  
7  
8  
9  
10  
11  
12  
13  
14  
15  
16  
17  
18  
19  
20  
21  
22  
23  
24  
25  
26  
27  
28  
29  
30  
31  
32  
33  
34  
35  
36  
37  
38  
39  
40  
41  
42  
43  
44  
45  
46

| Author, year of publication | Study title                                                                                              | Type of study | Database(s) | Study period (years) | Outcome description                                                                                                                                                                                                                                                                                                                                                                                                                                                                                                                                                                                                                                                                                                                                                         | List of codes available | Validation of list of codes | EHR-related eligibility criteria for the study // Follow up requirements | Handling of outcomes occurring prior to exposure | Notes                                          |
|-----------------------------|----------------------------------------------------------------------------------------------------------|---------------|-------------|----------------------|-----------------------------------------------------------------------------------------------------------------------------------------------------------------------------------------------------------------------------------------------------------------------------------------------------------------------------------------------------------------------------------------------------------------------------------------------------------------------------------------------------------------------------------------------------------------------------------------------------------------------------------------------------------------------------------------------------------------------------------------------------------------------------|-------------------------|-----------------------------|--------------------------------------------------------------------------|--------------------------------------------------|------------------------------------------------|
| John, 2016 [25]             | Recent trends in primary-care antidepressant prescribing to children and young people: an e-cohort study | Cohort study  | SAIL        | 2003-2013            | <p><u>Incident episode:</u> a Read code for a diagnosis or symptom of depression, or antidepressant, with no record of the given subtype (antidepressant prescription or depression diagnosis or depression symptom) in the previous 12 months; Participants could have more than one episode recorded across the study period as long a period of at least 12 months existed between entries within that subtype.</p> <p><u>Prevalent episode:</u> any record of the given subtype (antidepressant prescription or depression diagnosis or depression symptom) in a target year</p> <p><u>Annual recurrent episode:</u> defined as the first record in a given year of a given subtype where a record of that subtype exists previously in that individuals GP record.</p> | Yes                     | None stated                 | Registered with the GP practice for at least 1 year                      | Not applicable                                   | Explored the indication of the antidepressants |

For peer review only



1  
2

| 3<br>4<br>5<br>6<br>7                                                                      | Author,<br>year of<br>publication | Study title                                                                                                                                                                         | Type of study        | Database(s) | Study<br>period<br>(years) | Outcome description                                                                                                                                                                                                                                                                                                                                                                                                                                                                                                                                                                                                                | List of<br>codes<br>available    | Validation<br>of list of<br>codes | EHR-related<br>eligibility criteria<br>for the study<br>//<br>Follow up<br>requirements | Handling of<br>outcomes<br>occurring prior<br>to exposure                               | Notes                                                                                                                                                                                                              |
|--------------------------------------------------------------------------------------------|-----------------------------------|-------------------------------------------------------------------------------------------------------------------------------------------------------------------------------------|----------------------|-------------|----------------------------|------------------------------------------------------------------------------------------------------------------------------------------------------------------------------------------------------------------------------------------------------------------------------------------------------------------------------------------------------------------------------------------------------------------------------------------------------------------------------------------------------------------------------------------------------------------------------------------------------------------------------------|----------------------------------|-----------------------------------|-----------------------------------------------------------------------------------------|-----------------------------------------------------------------------------------------|--------------------------------------------------------------------------------------------------------------------------------------------------------------------------------------------------------------------|
| 8<br>9<br>10<br>11<br>12<br>13<br>14<br>15<br>16<br>17<br>18<br>19<br>20<br>21<br>22<br>23 | Kendrick,<br>2015 [26]            | Changes in rates of recorded depression in English primary care 2003-2013: time trend analyses of effects of the economic recession, and the GP contract quality outcomes framework | Cohort study         | CPRD        | 2003-2013                  | “had clinical or referral events recorded which included a Read code for non-psychotic depressive symptoms or diagnoses, or for assessment using depression symptom questionnaires.”<br><br>Prevalence of depression: Read code present in the year or quarter;<br><br>Incidence of depression: limited to patients who had no code for depression recorded in the previous 12 months.<br><br>Incidence of first-ever depression: no previous code for depression diagnosis, symptoms or antidepressant treatment recorded within 10 year study period, and no previous record of depression or antidepressant treatment recorded. | Yes                              | None stated                       | None stated                                                                             | Not applicable                                                                          | “We excluded patients with psychotic diagnoses including bipolar disorder, psychotic depression, and schizoaffective psychosis, and patients prescribed antidepressants for other indications besides depression.” |
| 24<br>25<br>26<br>27<br>28<br>29                                                           | Khan, 2010<br>[15]                | Consulting and prescribing behaviour for anxiety and depression in long-term survivors of cancer in the UK                                                                          | Matched cohort study | CPRD        | 2003-2006                  | Consultations for depression and prescriptions of as tricyclics, SSRIs and MAOIs                                                                                                                                                                                                                                                                                                                                                                                                                                                                                                                                                   | No<br><br>(Available on request) | None stated                       | None stated<br><br>//<br><br>Follow up duration: 3 years                                | History of anxiety prior to the analysis period was included in the models              | -                                                                                                                                                                                                                  |
| 30<br>31<br>32<br>33<br>34                                                                 | Rotz, 2017<br>[27]                | Cardiovascular and neuropsychiatric risks of varenicline and bupropion in smokers with chronic obstructive pulmonary disease                                                        | Matched cohort study | QResearch   | 2001-2012                  | Depression, not further specified                                                                                                                                                                                                                                                                                                                                                                                                                                                                                                                                                                                                  | No                               | None stated                       | Registered for >12 months before data extraction<br>//<br>Follow up duration 6 months   | History of neuropsychiatric events before the index date were considered as confounders | -                                                                                                                                                                                                                  |
| 35<br>36<br>37<br>38<br>39                                                                 | Rotz, 2015<br>[28]                | Cardiovascular and neuropsychiatric risks of varenicline: a retrospective cohort study                                                                                              | Matched cohort study | QResearch   | 2007-2012                  | Depression, not further specified                                                                                                                                                                                                                                                                                                                                                                                                                                                                                                                                                                                                  | No                               | None stated                       | Registered for >12 months before data extraction<br>//<br>Follow up duration 6 months   | History of neuropsychiatric events before the index date were considered as confounders | -                                                                                                                                                                                                                  |

40  
41  
42  
43  
44  
45  
46

1  
2

| 3<br>4<br>5<br>6<br>7                                    | Author, year of publication | Study title                                                                                                                                   | Type of study                            | Database(s) | Study period (years) | Outcome description                                                                                                                                              | List of codes available                                     | Validation of list of codes  | EHR-related eligibility criteria for the study // Follow up requirements                                                                                                                    | Handling of outcomes occurring prior to exposure                                                                                                         | Notes                                                                                                                                                                             |
|----------------------------------------------------------|-----------------------------|-----------------------------------------------------------------------------------------------------------------------------------------------|------------------------------------------|-------------|----------------------|------------------------------------------------------------------------------------------------------------------------------------------------------------------|-------------------------------------------------------------|------------------------------|---------------------------------------------------------------------------------------------------------------------------------------------------------------------------------------------|----------------------------------------------------------------------------------------------------------------------------------------------------------|-----------------------------------------------------------------------------------------------------------------------------------------------------------------------------------|
| 8<br>9<br>10<br>11<br>12<br>13<br>14                     | Kurd, 2005 [6]              | The risk of depression, anxiety, and suicidality in patients with psoriasis: A population-based cohort study                                  | Matched cohort study                     | CPRD        | 1987-2002            | Depression included all clinician diagnoses of depressive symptomology including bipolar disorder, defined by diagnostic Read or OXMIS codes                     | No<br><br>(refers using the same codes of previous studies) | None stated                  | None stated                                                                                                                                                                                 | Patients with history of anxiety in the 6 months before the index date were excluded in a sensitivity analysis.                                          | -                                                                                                                                                                                 |
| 15<br>16<br>17<br>18<br>19<br>20<br>21<br>22<br>23<br>24 | Lurie, 2015 [7]             | Antibiotic exposure and the risk for depression, anxiety, or psychosis: A nested case-control study                                           | Nested case control study                | THIN        | 1995-2013            | At least one Read code of depression; not further specified.                                                                                                     | Yes                                                         | None stated                  | Only records from patients that had been registered with the GP for more than 183 days<br>//<br>Outcomes were considered incidence if occurring at more than 183 days after the index date. | Patients who had pharmacological treatment for a specific psychiatric diagnosis more than 90 days before the diagnosis was first recorded were excluded. | Patients with mixed anxiety and depression were excluded from the analysis                                                                                                        |
| 25<br>26<br>27<br>28<br>29<br>30<br>31<br>32<br>33<br>34 | Martin-Merino, 2010 [29]    | Study of a cohort of patients newly diagnosed with depression in general practice: Prevalence, incidence, comorbidity, and treatment patterns | Cohort study, descriptive and analytical | THIN        | 2002-2004            | Patients with incident depression during the follow up but excluding those who had 5 or more prescriptions of an antidepressant before the depression diagnosis. | No                                                          | Yes<br><br>GP questionnaires | Registered for >2 years with their GP practice prior to the index date; Excluded patients aged >69 years who had fewer than 2 visits during the follow-up.                                  | All subjects who had a record of depression before the index date were excluded.                                                                         | Prevalence of depression calculated as the sum of all patients who had the outcome during the study, plus those who had the outcome in the two years before the study start date. |

35  
36  
37  
38  
39  
40  
41  
42  
43  
44  
45  
46

1

2

| 3 Author,<br>4 year of<br>5 publication | 6 Title                                                                                                                                                   | 7 Study title               | 8 Type of study                      | 9 Database(s) | 10 Study period (years)                                                                                                                                                                                                                                 | 11 Outcome description | 12 List of codes available | 13 Validation of list of codes                                                                         | 14 EHR-related eligibility criteria for the study // Follow up requirements                                                                                                                | 15 Handling of outcomes occurring prior to exposure                                                                                        | 16 Notes |
|-----------------------------------------|-----------------------------------------------------------------------------------------------------------------------------------------------------------|-----------------------------|--------------------------------------|---------------|---------------------------------------------------------------------------------------------------------------------------------------------------------------------------------------------------------------------------------------------------------|------------------------|----------------------------|--------------------------------------------------------------------------------------------------------|--------------------------------------------------------------------------------------------------------------------------------------------------------------------------------------------|--------------------------------------------------------------------------------------------------------------------------------------------|----------|
| 8 Meier, 2004<br>9 [9]                  | 10 The Risk of Severe Depression, Psychosis or Panic Attacks with Prophylactic Antimalarials                                                              | 11 Cohort study             | 12 CPRD                              | 13 1990-1999  | 14 Depression referred to specialist or hospital, or if received treatment with antidepressants at or after the diagnosis date identified by OXMIS- and/or- ICD-8-codes                                                                                 | 15 No                  | 16 Yes                     | 17 'reviewed a list of all cases to determine inclusion/exclusion'                                     | 18 ≥1 year of data available before index date and "some GPRD activity (diagnoses or prescriptions) recorded after the index date" // Patients were censored 18 months after exposure date | 19 "The base population for person-time analyses consisted of all subjects free of depression at the start of follow up."                  | 20 -     |
| 21 Wilson, 2000 [30]                    | 22 Are triptans with enhanced lipophilicity used for the acute treatment of migraine associated with an increased consulting rate for depressive illness? | 23 Cohort study, analytical | 24 CPRD, data for the West Midlands  | 25 1993-1997  | 26 'consulting at least once for depression'                                                                                                                                                                                                            | 27 Yes                 | 28 No                      | 29 None stated                                                                                         | 30 None stated                                                                                                                                                                             | 31 None Stated                                                                                                                             | 32 -     |
| 33 Mijlojevic, 2017 [31]                | 34 Mental health impacts of flooding: a controlled interrupted time series analysis of prescribing data in England                                        | 35 Cohort study             | 36 General practice prescribing data | 37 2010-2015  | 38 Antidepressants prescription                                                                                                                                                                                                                         | 39 No                  | 40 Not applicable          | 41 (but list of antidepressants provided in appendix)                                                  | 42 None stated                                                                                                                                                                             | 43 Not applicable                                                                                                                          | 44 -     |
| 45 Moore, 2009 [32]                     | 46 Explaining the rise in antidepressant prescribing: a descriptive study using the general practice research database                                    | 47 Cohort study             | 48 CPRD                              | 49 1993-2005  | 50 Depression: "first ever antidepressant prescription for depression diagnosed up to 180 days before or 90 days after the prescribing event, or received a first ever diagnosis of depression without an associated prescription for antidepressants." | 51 No                  | 52 None stated             | 53 Registered with practices contributing with up to standard quality data for the entire study period | 54 Patients only included if it was the first ever events during the follow up period.                                                                                                     | 55 Provides data for treatment patterns: chronic treatment; intermittent treatment; short-term treatment; delayed treatment; no treatment. | 56 -     |

37

38

39

40

41

42

43

44

45

46

1  
2

| 3<br>4<br>5<br>6<br>7                                                | Author,<br>year of<br>publication | Study title                                                                                                                                                                                             | Type of study                          | Database(s) | Study<br>period<br>(years) | Outcome description                                                                                                                                                                                                                                                                                                                                                                                                                                                    | List of<br>codes<br>available                | Validation<br>of list of<br>codes | EHR-related<br>eligibility<br>criteria<br>for the study<br>//<br>Follow up<br>requirements                              | Handling of<br>outcomes<br>occurring prior<br>to exposure                                                                                                                       | Notes                                                                             |
|----------------------------------------------------------------------|-----------------------------------|---------------------------------------------------------------------------------------------------------------------------------------------------------------------------------------------------------|----------------------------------------|-------------|----------------------------|------------------------------------------------------------------------------------------------------------------------------------------------------------------------------------------------------------------------------------------------------------------------------------------------------------------------------------------------------------------------------------------------------------------------------------------------------------------------|----------------------------------------------|-----------------------------------|-------------------------------------------------------------------------------------------------------------------------|---------------------------------------------------------------------------------------------------------------------------------------------------------------------------------|-----------------------------------------------------------------------------------|
| 8<br>9<br>10<br>11<br>12<br>13<br>14<br>15                           | Morgan,<br>2014 [33]              | General practice-<br>recorded depression<br>and antidepressant use<br>in young people with<br>newly diagnosed Type 1<br>diabetes: a cohort study<br>using the Clinical<br>Practice Research<br>Datalink | Matched cohort<br>study                | CPRD        | 1988-2010                  | Depression identified from diagnosis<br>codes (Oxford Medical Information<br>System and Read), along with at<br>least one antidepressant prescription<br>(monoamine oxidase inhibitors,<br>selective serotonin reuptake<br>inhibitors, tricyclic antidepressants or<br>other antidepressants).                                                                                                                                                                         | No                                           | None<br>stated                    | None stated                                                                                                             | Participants with<br>depression<br>diagnoses or<br>prescriptions<br>prior to diabetes<br>diagnosis (or<br>prior to the start<br>date for control<br>subjects) were<br>excluded. | -                                                                                 |
| 16<br>17<br>18<br>19<br>20<br>21                                     | Petersen,<br>2006 [34]            | Risk and predictors of<br>fatigue after infectious<br>mononucleosis in a<br>large primary-care<br>cohort                                                                                                | Nested case<br>control cohort<br>study | CPRD        | 1989-2000                  | Depression, not further specified                                                                                                                                                                                                                                                                                                                                                                                                                                      | No<br><br>(available<br>from the<br>authors) | None<br>stated                    | At least one year<br>of data before<br>diagnosis<br>//<br>At least one year<br>of complete follow<br>up after diagnosis | Included<br>patients who did<br>not have fatigue<br>in the year<br>before onset                                                                                                 | -                                                                                 |
| 22<br>23<br>24<br>25<br>26<br>27<br>28<br>29<br>30<br>31<br>32<br>33 | Rait, 2009<br>[35]                | Recent trends in the<br>incidence of recorded<br>depression in primary<br>care                                                                                                                          | Cohort study                           | THIN        | 1996-2006                  | “Diagnoses of<br>depression (e.g. ‘depressive<br>disorder’) and recorded depressive<br>symptoms (e.g. ‘low mood’). new<br>episode of diagnosed<br>depression was defined as an entry<br>in the records where there<br>was no previous diagnosis of<br>depression coded in the previous<br>year. A new episode of depressive<br>symptoms was also defined as<br>an entry where there had been no<br>previous recorded depressive<br>symptom code in the previous year.” | No                                           | None<br>stated                    | At least one year<br>of follow up data<br>//<br>ND                                                                      | None stated                                                                                                                                                                     | Provides results<br>separately for<br>diagnoses and<br>symptoms of<br>depression. |
| 34<br>35<br>36                                                       | Shah, 2016<br>[36]                | The mental health and<br>mortality impact of death<br>of a partner with<br>dementia                                                                                                                     | Nested case<br>control study           | THIN        | 2005-2008                  | Depression, not further specified                                                                                                                                                                                                                                                                                                                                                                                                                                      | Yes                                          | None<br>stated                    | At least one year<br>of data with the<br>practice                                                                       | None stated                                                                                                                                                                     | -                                                                                 |

37  
38  
39  
40  
41  
42  
43  
44  
45  
46

1

2

| 3 Author,<br>4 year of<br>5 publication | 6 Study title                                                                                                                                                          | 7 Type of study                 | 8 Database(s) | 9 Study<br>period<br>(years) | 10 Outcome description                                                                                                                                                                                                                   | 11 List of<br>codes<br>available | 12 Validation<br>of list of<br>codes | 13 EHR-related<br>eligibility<br>criteria<br>for the study<br>//<br>14 Follow up<br>requirements                                                        | 15 Handling of<br>outcomes<br>occurring prior<br>to exposure                                                                                   | 16 Notes                                                                                                              |
|-----------------------------------------|------------------------------------------------------------------------------------------------------------------------------------------------------------------------|---------------------------------|---------------|------------------------------|------------------------------------------------------------------------------------------------------------------------------------------------------------------------------------------------------------------------------------------|----------------------------------|--------------------------------------|---------------------------------------------------------------------------------------------------------------------------------------------------------|------------------------------------------------------------------------------------------------------------------------------------------------|-----------------------------------------------------------------------------------------------------------------------|
| 8 Schneider,<br>9 2013 [10]             | 10 Antimalarial<br>chemoprophylaxis and<br>11 the risk of<br>12 neuropsychiatric<br>13 disorders                                                                       | 14 Nested case<br>control study | 15 CPRD       | 16 2001-2009                 | 17 Incident diagnosis of depression, not<br>18 further specified                                                                                                                                                                         | 19 Yes                           | 20 None<br>stated                    | 21 At least 1 year of<br>date before the<br>index date<br>//<br>22 some activity<br>(diagnoses or<br>prescriptions)<br>recorded after the<br>index date | 23 Excluded<br>patients with the<br>outcome of<br>interest<br>observed before<br>the index date                                                | 24 Excluded<br>patients with<br>history of<br>cancer,<br>alcoholism, and<br>rheumatoid<br>arthritis.                  |
| 15 Schneider,<br>16 2010 [37]           | 17 COPD and the risk of<br>depression                                                                                                                                  | 18 Cohort study                 | 19 CPRD       | 20 1995-2005                 | 21 Diagnosis of depression, not further<br>specified<br><br>22 In sensitivity analysis, only cases<br>with an incident diagnosis of<br>depression who receive<br>pharmacological treatment within 6<br>months of diagnosis were included | 23 Yes                           | 24 None<br>stated                    | 25 Excluded patients<br>with less than 3<br>years of active<br>recording history<br>prior to the date of<br>the COPD<br>diagnosis                       | 26 Patients with<br>previous history<br>of depression,<br>suicide, suicidal<br>ideation, etc.,<br>prior to the index<br>date were<br>excluded  | 27 Excluded<br>patients with<br>history of<br>cancer, HIV,<br>drug abuse, or<br>alcoholism prior<br>to the index date |
| 22 Sheehan,<br>23 2015 [11]             | 24 Mental illness,<br>challenging behaviour,<br>and psychotropic drug<br>prescribing in people<br>with intellectual<br>disability: UK population<br>based cohort study | 25 Cohort study,<br>analytical  | 26 THIN       | 27 1999-2013                 | 28 Read codes for depression<br>(including mixed depression-anxiety)<br>that the authors' used in previous<br>studies.                                                                                                                   | 29 Yes                           | 30 None<br>stated                    | 31 Entry in the cohort<br>at least one year<br>after registration<br>with the practice                                                                  | 32 None stated                                                                                                                                 | 33 Excludes cases<br>of mixed anxiety<br>and depression                                                               |
| 28 Smeeth,<br>29 2008 [38]              | 30 Effect of statins on a<br>wide range of health<br>outcomes: A cohort<br>study validated by<br>comparison with<br>randomized trials                                  | 31 Cohort study                 | 32 THIN       | 33 1995-2006                 | 34 Depression defined as the start of<br>antidepressant pharmacotherapy                                                                                                                                                                  | 35 No                            | 36 None<br>stated                    | 37 None stated                                                                                                                                          | 38 People with a<br>previous history<br>of the outcome<br>prior to the index<br>date were<br>excluded from<br>the analysis of<br>that outcome. | 39 First year of<br>follow up was<br>excluded.                                                                        |

36

37

38

39

40

41

42

43

44

45

46

1  
2

| 3<br>4<br>5<br>6<br>7                        | Author,<br>year of<br>publication | Study title                                                                                                                                                       | Type of study                 | Database(s)        | Study<br>period<br>(years) | Outcome description                                                                                                                                                                                                                                                                                                                         | List of<br>codes<br>available | Validation<br>of list of<br>codes | EHR-related<br>eligibility criteria<br>for the study<br>//<br>Follow up<br>requirements                   | Handling of<br>outcomes<br>occurring prior<br>to exposure                                                                  | Notes |
|----------------------------------------------|-----------------------------------|-------------------------------------------------------------------------------------------------------------------------------------------------------------------|-------------------------------|--------------------|----------------------------|---------------------------------------------------------------------------------------------------------------------------------------------------------------------------------------------------------------------------------------------------------------------------------------------------------------------------------------------|-------------------------------|-----------------------------------|-----------------------------------------------------------------------------------------------------------|----------------------------------------------------------------------------------------------------------------------------|-------|
| 8<br>9<br>10<br>11<br>12<br>13<br>14<br>15   | Smith, 2014<br>[39]               | Depression and<br>multimorbidity: a cross-<br>sectional study of<br>1,751,841 patients in<br>primary care                                                         | Cross-sectional               | PCCIU              | ND-2007                    | “Read code for depression recorded<br>within last year and/or 4 or more<br>antidepressant prescriptions<br>(excluding low-dose tricyclic<br>antidepressants) within the last year.<br>Low-dose tricyclic antidepressants<br>were excluded because they are<br>commonly prescribed for chronic<br>pain syndromes rather than<br>depression.” | No                            | None<br>stated                    | Patients alive and<br>permanently<br>registered with a<br>general practice at<br>the date of the<br>study | None stated                                                                                                                | -     |
| 16<br>17<br>18<br>19<br>20<br>21<br>22<br>23 | Thomas,<br>2013 [40]              | Smoking cessation<br>treatment and risk of<br>depression, suicide, and<br>self harm in the Clinical<br>Practice Research<br>Datalink: prospective<br>cohort study | Nested case-<br>control study | CPRD<br>HES<br>ONS | 2006-2011                  | “Incident episodes of depression as<br>measured by the date that<br>antidepressant treatment was<br>initiated (treated depression)”<br><br>//<br><br>For comparison with previous study,<br>depression was also defined with<br>Read codes only in CPRD                                                                                     | Yes                           | None<br>stated                    | At least one year<br>of registration with<br>the practice prior<br>to the index date<br>//<br>ND          | Previous<br>psychiatric<br>illness, and use<br>of psychotropic<br>medication<br>considered as<br>potential<br>confounders. | -     |
| 24<br>25<br>26<br>27<br>28                   | Tyrer, 1999<br>[41]               | A study of<br>cardiovascular disease,<br>depression and<br>antidepressants on a<br>computerised general<br>practice database                                      | Cohort study                  | UK<br>MediPlus     | 1995-1996                  | ‘new diagnosis of depression and<br>treatment, classified by the first<br>antidepressant prescribed.’                                                                                                                                                                                                                                       | No                            | None<br>stated                    | At least 12 months<br>of data before the<br>index date<br>//<br>Follow up duration<br>12 months           | Patients with<br>depression in<br>the 12 months<br>period before<br>the cardiac<br>event were<br>excluded.                 | -     |
| 29<br>30<br>31<br>32<br>33                   | Vallerand,<br>2018 [42]           | Risk of depression<br>among patients with<br>acne in the U.K.: a<br>population-based cohort<br>study                                                              | Cohort study,<br>analytical   | THIN               | 1986-2012                  | Read code for major depressive<br>disorder                                                                                                                                                                                                                                                                                                  | Yes                           | None<br>stated                    | None stated<br>//<br>Follow up for > 2<br>years after index<br>date                                       | Patients with<br>MDD Read code<br>prior to the start<br>of follow up were<br>excluded                                      | -     |

34  
35  
36  
37  
38  
39  
40  
41  
42  
43  
44  
45  
46

1  
2

| 3Author,<br>4year of<br>5publication | 6Title                                                                                                                                                     | 7Study title                                     | Type of study | Database(s)     | Study period (years)                                                                                                                                                                                                                                  | Outcome description                                   | List of codes available                                                                                                                         | Validation of list of codes                                                                                      | EHR-related eligibility criteria for the study // Follow up requirements                                                                                            | Handling of outcomes occurring prior to exposure | Notes |
|--------------------------------------|------------------------------------------------------------------------------------------------------------------------------------------------------------|--------------------------------------------------|---------------|-----------------|-------------------------------------------------------------------------------------------------------------------------------------------------------------------------------------------------------------------------------------------------------|-------------------------------------------------------|-------------------------------------------------------------------------------------------------------------------------------------------------|------------------------------------------------------------------------------------------------------------------|---------------------------------------------------------------------------------------------------------------------------------------------------------------------|--------------------------------------------------|-------|
| 8Walters,<br>92011 [43]              | 10The relationship<br>11between asthma and<br>12depression in primary<br>13care patients: A<br>14historical cohort and<br>15nested case control<br>16study | Cohort study<br>and nested case<br>control study | CPRD          | 1995-2006       | GP recorded diagnosis of<br>depression, as defined by<br>Read/OXMIS codes) during the<br>study period                                                                                                                                                 | No<br><br>(codes<br>available<br>from the<br>authors) | None<br>stated                                                                                                                                  | All patients had at<br>least 24 months of<br>'up to standard'<br>data prior to the<br>index date of the<br>case. | All cases with a<br>recorded<br>medical<br>diagnosis of<br>depression or<br>depressive<br>symptoms<br>before the index<br>date were<br>excluded from<br>the cohort. | -                                                |       |
| 17Pang, 2003<br>18[44]               | Lipid-lowering drugs and<br>the risk of depression<br>and suicidal behavior                                                                                | Matched cohort<br>study                          | CPRD          | 1991<br>onwards | Treated depression (with<br>antidepressants) referred to a<br>consultant or patient hospitalized for<br>depression; excluded patients who<br>also had diagnosis of anxiety or with<br>specific causes for depression (e.g.<br>post-partum depression) | No                                                    | Yes<br><br>List of<br>patients<br>referred to<br>hospital or<br>consultant<br>were<br>manually<br>reviewed;<br>referral<br>letters<br>reviewed. | ≥1 year of data<br>available before<br>index date                                                                | Patients with<br>history of<br>depression prior<br>to study start<br>were excluded                                                                                  | -                                                |       |

26 CPRD – Clinical Practice Research Datalink; EHR – electronic health records; HES – Hospital Episodes Statistics; ICD-10 – International Classification of Diseases, edition 10;  
 27 ND – not defined; PCCIU – Primary Care Clinical Informatics Unit Research; SAIL – SAIL Databank - The Secure Anonymised Information Linkage Databank; THIN – The Health  
 28 Improvement Network; ONS – Office for National Statistics.

29  
30  
31  
32  
33  
34  
35  
36  
37  
38  
39  
40  
41  
42  
43  
44  
45  
46

1  
2  
3 **Table 3. Main characteristics of the eligible studies: composite outcomes, anxiety and depression.**  
4

5  
6  
7  
8  
9

| Author, year of publication | Study title                                                                                                                                                                   | Type of study                                                         | Database(s) | Study period (years) | Outcome description                                                                                                                                                                                                                                                                                                                                                                                                                                                                                                                                                                                                                                                                                                                                                                                                                                                                                                                                                    | List of codes available | Validation of list of codes                | EHR-related eligibility criteria for the study // Follow up requirements | Handling of outcomes occurring prior to exposure                                                                                                                                                                                                              | Notes |
|-----------------------------|-------------------------------------------------------------------------------------------------------------------------------------------------------------------------------|-----------------------------------------------------------------------|-------------|----------------------|------------------------------------------------------------------------------------------------------------------------------------------------------------------------------------------------------------------------------------------------------------------------------------------------------------------------------------------------------------------------------------------------------------------------------------------------------------------------------------------------------------------------------------------------------------------------------------------------------------------------------------------------------------------------------------------------------------------------------------------------------------------------------------------------------------------------------------------------------------------------------------------------------------------------------------------------------------------------|-------------------------|--------------------------------------------|--------------------------------------------------------------------------|---------------------------------------------------------------------------------------------------------------------------------------------------------------------------------------------------------------------------------------------------------------|-------|
| 10 John, 2016<br>11 [45]    | 12 Case-finding for<br>13 common mental<br>14 disorders of anxiety and<br>15 depression in primary<br>16 care: an external<br>17 validation of routinely<br>18 collected data | 19 Validation study<br>20 using patient<br>21 reported<br>22 outcomes | 23 SAIL     | 24 2000-2009         | 25 <u>Outcome:</u> Common mental<br>26 disorders, defined as anxiety and<br>27 depression.<br>28<br>29 Read codes for: i) anxiety diagnosis,<br>30 e.g. generalised anxiety disorder; ii)<br>31 anxiety symptoms e.g. anxiousness;<br>32 iii) mixed anxiety and depression; iv)<br>33 panic attacks and panic disorders; v)<br>34 depression diagnoses; vi)<br>35 depression symptoms.<br>36<br>37 Treatment defined as having at least<br>38 one prescription for an<br>39 antidepressant, anxiolytic or<br>40 hypnotic within the year around the<br>41 date of the survey answer.<br>42<br>43 Excluded codes for other psychosis,<br>44 phobias, obsessive compulsive<br>45 disorders, post traumatic stress<br>46 disorder, behavioural disorders,<br>hyperkinetic disorders, conduct<br>disorders, disorders of social<br>functioning, and adjustment<br>disorders.<br>Defined 12 algorithms with current<br>and historical symptoms, diagnosis<br>and treatment. | Yes                     | Yes<br><br>Patient<br>reported<br>outcomes | At least 6 months<br>after registration<br>with the practice             | Not applicable<br>(no exposure<br>under study).<br><br>Incidence<br>outcome were<br>those where no<br>previous entry<br>had been<br>recorded around<br>1 year of the<br>date of the<br>survey answer.<br><br>Other outcomes<br>were considered<br>historical. | -     |



1  
2  
3  
4  
5  
6  
7  
8  
9  
10  
11  
12  
13  
14  
15  
16  
17  
18  
19  
20  
21  
22  
23  
24  
25  
26  
27  
28  
29  
30  
31  
32  
33  
34  
35  
36  
37  
38  
39  
40  
41  
42  
43  
44  
45  
46

For peer review only

| Author, year of publication | Study title                                                                          | Type of study             | Database(s) | Study period (years) | Outcome description                                                                                                                                                                                                                                                                                                 | List of codes available | Validation of list of codes | EHR-related eligibility criteria for the study // Follow up requirements                                                                                                                             | Handling of outcomes occurring prior to exposure | Notes |
|-----------------------------|--------------------------------------------------------------------------------------|---------------------------|-------------|----------------------|---------------------------------------------------------------------------------------------------------------------------------------------------------------------------------------------------------------------------------------------------------------------------------------------------------------------|-------------------------|-----------------------------|------------------------------------------------------------------------------------------------------------------------------------------------------------------------------------------------------|--------------------------------------------------|-------|
| Turner, 2016 [46]           | Ongoing impairments following transient ischaemic attack: retrospective cohort study | Nested case control study | THIN        | 2009-2013            | Outcome: Psychological impairment, defined as anxiety, depression and post-traumatic stress disorder.<br><br>First consultation after the index date with a Read code for symptoms or diagnosis of anxiety, depression or post-traumatic stress, plus a first prescription of an antianxiety or antidepressant drug | Yes                     | None stated                 | Practice with at least one year of up to standard data, and patients registered for at least one year with the practice.<br>//<br>Patient alive and registered with the practice 1 month after index | Not stated.                                      | -     |

SAIL – SAIL Databank - The Secure Anonymised Information Linkage Databank; THIN – The Health Improvement Network.

Table 4. Main characteristics of the eligible studies: dementia.

| Author, year of publication | Study title                                                                                                                       | Type of study             | Database(s) | Study period (years) | Outcome description                                                                                                                                                                                                               | List of codes available | Validation of list of codes | EHR-related eligibility criteria for the study // Follow up requirements                                               | Handling of outcomes occurring prior to exposure                     | Notes |
|-----------------------------|-----------------------------------------------------------------------------------------------------------------------------------|---------------------------|-------------|----------------------|-----------------------------------------------------------------------------------------------------------------------------------------------------------------------------------------------------------------------------------|-------------------------|-----------------------------|------------------------------------------------------------------------------------------------------------------------|----------------------------------------------------------------------|-------|
| Brown, 2016 [47]            | Comparison of dementia recorded in routinely collected hospital admission data in England with dementia recorded in primary care  | Validation study          | CPRD HES    | 1990-2012            | Read codes for dementia and/or a code for a drug specifically prescribed for dementia (i.e. donepezil, galantamine, memantine and rivastigmine).                                                                                  | Yes                     | Yes                         | At least 12 months before and 12 months after the first HES record of dementia                                         | Not applicable                                                       | -     |
| Davies, 2014 [48]           | Associations of anti-hypertensive treatments with Alzheimer's disease, vascular dementia, and other dementias                     | Nested case-control study | CPRD        | 1997-2008            | Alzheimer's disease, vascular dementia, or unspecified/other dementias<br><br>Created four categories: probable Alzheimer's disease, possible Alzheimer's disease, vascular dementia, combine unspecified or other dementia.      | Yes                     | No                          | None stated                                                                                                            | Not applicable                                                       | -     |
| Donegan, 2017 [49]          | Trends in diagnosis and treatment for people with dementia in the UK from 2005 to 2015: a longitudinal retrospective cohort study | Cohort study              | CPRD        | 2005-2015            | Dementia defined using Read codes listed for the condition in the Quality and Outcomes Framework                                                                                                                                  | No                      | No                          | Patients were eligible for analysis if registered with the practice for the entire quarter of the year being analysed; | Not applicable (descriptive study of the incident cases of dementia) | -     |
| Dregan, 2015 [50]           | Are Inflammation and Related Therapy Associated with All-Cause Dementia in a Primary Care Population?                             | Matched cohort study      | CPRD        | 2002-2013            | "Medical diagnostic codes were used to identify new diagnoses of dementia including Alzheimer's disease, vascular dementia, Lewy body dementia, frontotemporal dementia, dementia in other conditions, and unspecified dementia." | No                      | No                          | None stated                                                                                                            | Considered incident cases only                                       | -     |

| Author, year of publication | Study title                                                                                                                                    | Type of study              | Database(s)        | Study period (years) | Outcome description                                                                                                                                                                                                                                                                                                                                                                                               | List of codes available | Validation of list of codes | EHR-related eligibility criteria for the study // Follow up requirements                                                                                                  | Handling of outcomes occurring prior to exposure  | Notes                                                               |
|-----------------------------|------------------------------------------------------------------------------------------------------------------------------------------------|----------------------------|--------------------|----------------------|-------------------------------------------------------------------------------------------------------------------------------------------------------------------------------------------------------------------------------------------------------------------------------------------------------------------------------------------------------------------------------------------------------------------|-------------------------|-----------------------------|---------------------------------------------------------------------------------------------------------------------------------------------------------------------------|---------------------------------------------------|---------------------------------------------------------------------|
| Dregan, 2015 [51]           | Patterns of anti-inflammatory drug use and risk of dementia: a matched case-control study                                                      | Matched case control study | CPRD               | 1992-2014            | "Medical diagnostic codes were used to identify new diagnoses of dementia and include non-specific dementia (Eu02z), Alzheimer disease (F110), vascular dementia (Eu01), Lewy body dementia (Eu025), senile dementia (E00) and dementia in other conditions (Eu02)."                                                                                                                                              | Yes                     | No                          | None stated                                                                                                                                                               | Considered incident diagnosis                     | -                                                                   |
| Dunn, 2005 [52]             | Does lithium therapy protect against the onset of dementia?                                                                                    | Nested case control study  | CPRD               | 1992-2002            | 'Cases with definite diagnosis of Alzheimer disease, vascular dementia (with which there is a diagnostic overlap), and those with uncertain cause of dementia'                                                                                                                                                                                                                                                    | No                      | Yes<br>GP Questionnaire     | "At least 4 years of research standard data preceding the date of the diagnosis" //                                                                                       | Considered incident cases only                    | -                                                                   |
| Dunn, 2005 [53]             | Association between dementia and infectious disease: evidence from a case-control study                                                        | Nested case control study  | CPRD               | 1992-2002            | "We identified cases as all those patients with an incident dementia, as diagnosed by their GP, a GP colleague, or a hospital specialist (...) We included cases with a recorded diagnosis of Alzheimer disease, vascular dementia (with which there is diagnostic overlap), and those with uncertain cause of dementia. Other specified causes of dementia were excluded (eg, dementia in Parkinson's disease)." | No                      | Yes<br>GP questionnaires    | "At least 4 years of research standard data preceding the date of first diagnosis (median time from onset of symptoms to diagnosis has been estimated at 4 years)." // ND | Considered incident cases only                    | Cases further classified as probable or possible cases of dementia. |
| Emdin, 2016 [54]            | Blood Pressure and Risk of Vascular Dementia: Evidence From a Primary Care Registry and a Cohort Study of Transient Ischemic Attack and Stroke | Cohort study               | CPRD<br>HES<br>ONS | 1990-2003            | First record of vascular dementia, in one of the databases. For the primary analysis, cases of Alzheimer's disease and vascular dementia (i.e. mixed dementia) were included.                                                                                                                                                                                                                                     | Yes                     | No                          | Registered with the GP practice for at least one year // First 4 years of follow up excluded from analysis                                                                | First 4 years of follow up excluded from analysis | -                                                                   |

| Author, year of publication | Study title                                                                                                                                                        | Type of study             | Database(s) | Study period (years) | Outcome description                                                                                                                                              | List of codes available                                          | Validation of list of codes | EHR-related eligibility criteria for the study // Follow up requirements                                                               | Handling of outcomes occurring prior to exposure                                                                     | Notes                                         |
|-----------------------------|--------------------------------------------------------------------------------------------------------------------------------------------------------------------|---------------------------|-------------|----------------------|------------------------------------------------------------------------------------------------------------------------------------------------------------------|------------------------------------------------------------------|-----------------------------|----------------------------------------------------------------------------------------------------------------------------------------|----------------------------------------------------------------------------------------------------------------------|-----------------------------------------------|
| Goh, 2014 [55]              | Angiotensin receptor blockers and risk of dementia: cohort study in UK Clinical Practice Research Datalink                                                         | Cohort study              | CPRD        | 1995-2010            | New diagnosis of dementia, defined by Read codes, excluding specific causes of dementia (e.g. dementia in neoplastic disease).                                   | Yes                                                              | No                          | At least 6 months of registration with the GP practice // Outcome occurring in the first year after the index date were not considered | Excluded all individuals with a record of dementia or cognitive impairment prior to the date of entry in the study   | -                                             |
| Granerod, 2016 [3]          | Increased rates of sequelae post-encephalitis in individuals attending primary care practices in the United Kingdom: a population-based retrospective cohort study | Nested case control study | CPRD        | 1998-2012            | "cognitive problems (including memory loss, aphasia, difficulty processing information, difficulty reasoning, difficulty concentrating and learning disability)" | Not provided in the original study but obtained from the authors | None stated                 | None stated // At least one contact with the GP practice in the two years after the index date.                                        | Analysis restricted to those at risk of a new-onset outcome, defined as no code in the year prior to the index date. | Dementia diagnosis were considered separately |
| Hippisley-Cox, 2010 [56]    | Unintended effects of statins in men and women in England and Wales: population based cohort study using the QResearch database                                    | Cohort study              | QResearch   | 2002-2008            | Dementia, defined with Read codes, not further specified.                                                                                                        | No; states that code list is available on request                | No                          | At least one year of registration with the practice // ND                                                                              | Incident cases included in the study                                                                                 | -                                             |

1  
2  
3  
4  
5  
6  
7  
8  
9  
10  
11  
12  
13  
14  
15  
16  
17  
18  
19  
20  
21  
22  
23  
24  
25  
26  
27  
28  
29  
30  
31  
32  
33  
34  
35  
36  
37  
38  
39  
40  
41  
42  
43  
44  
45  
46

| Author, year of publication | Study title                                                                                                 | Type of study             | Database(s) | Study period (years) | Outcome description                                                                                                                                                                                                                                                                                                                                                                                                                                                                                                                                                                                                                                                                                                                                                           | List of codes available | Validation of list of codes | EHR-related eligibility criteria for the study // Follow up requirements | Handling of outcomes occurring prior to exposure     | Notes |
|-----------------------------|-------------------------------------------------------------------------------------------------------------|---------------------------|-------------|----------------------|-------------------------------------------------------------------------------------------------------------------------------------------------------------------------------------------------------------------------------------------------------------------------------------------------------------------------------------------------------------------------------------------------------------------------------------------------------------------------------------------------------------------------------------------------------------------------------------------------------------------------------------------------------------------------------------------------------------------------------------------------------------------------------|-------------------------|-----------------------------|--------------------------------------------------------------------------|------------------------------------------------------|-------|
| Imfeld, 2012 [57]           | Metformin, other antidiabetic drugs, and risk of Alzheimer's disease: a population-based case-control study | Nested case control study | CPRD        | 1998-2008            | "either a diagnosis of AD followed by at least one prescription for an AD drug or vice versa; a diagnosis of dementia followed by at least two prescriptions for an AD drug; at least two recordings of an AD diagnosis; an AD diagnosis after a specific dementia test (e.g., Mini-Mental State Examination (MMSE), Clock Drawing Test (CDT), or Abbreviated Mental Test (7-min screen)), a referral to a specialist (e.g., neurologist, geriatrician, or psychogeriatrician), an assessment based on a neuroimaging technique (e.g., magnetic resonance imaging (MRI), computed tomography (CT), or single-photon emission CT (SPECT)); or an AD diagnosis preceded or followed by any recorded dementia symptoms (e.g., memory impairment, aphasia, apraxia, or agnosia)." | No                      | Yes<br><br>GP questionnaire | Patients with >3 years of active history in the database were excluded.  | First time diagnosis of Alzheimer's disease included | -     |

For peer review only

| Author, year of publication | Study title                                                                                                          | Type of study            | Database(s) | Study period (years) | Outcome description                                                                                                                                                                                                                                                                                                                                                                                                                                                                                                                                                                                                                                                                                                                                                                                                                                                                                                                                                                                                                                                                                                 | List of codes available | Validation of list of codes  | EHR-related eligibility criteria for the study // Follow up requirements | Handling of outcomes occurring prior to exposure       | Notes                                                                                                                                                                                                                                                                                              |
|-----------------------------|----------------------------------------------------------------------------------------------------------------------|--------------------------|-------------|----------------------|---------------------------------------------------------------------------------------------------------------------------------------------------------------------------------------------------------------------------------------------------------------------------------------------------------------------------------------------------------------------------------------------------------------------------------------------------------------------------------------------------------------------------------------------------------------------------------------------------------------------------------------------------------------------------------------------------------------------------------------------------------------------------------------------------------------------------------------------------------------------------------------------------------------------------------------------------------------------------------------------------------------------------------------------------------------------------------------------------------------------|-------------------------|------------------------------|--------------------------------------------------------------------------|--------------------------------------------------------|----------------------------------------------------------------------------------------------------------------------------------------------------------------------------------------------------------------------------------------------------------------------------------------------------|
| Imfeld, 2013 [58]           | Epidemiology, co-morbidities, and medication use of patients with Alzheimer's disease or vascular dementia in the UK | Descriptive cohort study | CPRD        | 1998-2008            | "A patient was required to have either: 1) a diagnosis of AD followed by at least one prescription for an AD drug or vice versa; 2) a diagnosis of unspecific dementia followed by at least two prescriptions for an AD drug; 3) at least two recordings of an AD diagnosis; 4) an AD diagnosis after a specific dementia test (e.g., Mini Mental State Examination, Clock Drawing Test, or Abbreviated Mental Test [7-Minute Screen]), a referral to a specialist (e.g., neurologist, geriatrician or psycho-geriatrician), or an assessment based on neuroimaging technique (e.g., magnetic resonance imaging, computed tomography, or single photon emission computed tomography); or 5) an AD diagnosis preceded or followed by any recorded dementia symptoms (e.g., memory impairment, aphasia, apraxia, or agnosia). In addition, AD patients with a recording of any other specific dementia diagnosis (e.g., VaD, Pick's disease, or dementia with Lewy bodies) after the index date were not eligible, as well as those AD patients with a recording of stroke within two years prior to the index date." | No                      | Yes<br><br>GP questionnaires | None stated                                                              | Considered incident cases during the study period only | "cases were not eligible if they had had a stroke before the index date (because this is more indicative of a diagnosis of vascular dementia (VaD) <sup>16</sup> or a recording of any other specific dementia diagnosis (e.g., VaD, Pick's disease, or Lewy body dementia) after the index date." |

1  
2  
3  
4  
5  
6  
7  
8  
9  
10  
11  
12  
13  
14  
15  
16  
17  
18  
19  
20  
21  
22  
23  
24  
25  
26  
27  
28  
29  
30  
31  
32  
33  
34  
35  
36  
37  
38  
39  
40  
41  
42  
43  
44  
45  
46

For peer review only

| Author, year of publication | Study title                                                                                                 | Type of study             | Database(s) | Study period (years) | Outcome description                                                                                                                                                                                                                                                                                                                                                                                                                                                                                                                                                                                                                                                                                                                                                                                                                                                                                                                                                                             | List of codes available | Validation of list of codes                                                               | EHR-related eligibility criteria for the study // Follow up requirements      | Handling of outcomes occurring prior to exposure       | Notes |
|-----------------------------|-------------------------------------------------------------------------------------------------------------|---------------------------|-------------|----------------------|-------------------------------------------------------------------------------------------------------------------------------------------------------------------------------------------------------------------------------------------------------------------------------------------------------------------------------------------------------------------------------------------------------------------------------------------------------------------------------------------------------------------------------------------------------------------------------------------------------------------------------------------------------------------------------------------------------------------------------------------------------------------------------------------------------------------------------------------------------------------------------------------------------------------------------------------------------------------------------------------------|-------------------------|-------------------------------------------------------------------------------------------|-------------------------------------------------------------------------------|--------------------------------------------------------|-------|
| Imfeld, 2015 [59]           | Benzodiazepine Use and Risk of Developing Alzheimer's Disease or Vascular Dementia: A Case-Control Analysis | Case control              | CPRD        | 1998-2013            | "first time diagnosis of AD, VaD, or any unspecified dementia (based on Read codes) (...), or who received a first-time prescription for an acetylcholinesterase inhibitor (i.e. donepezil, rivastigmine, galantamine, or tacrine) or the N-methyl-D-aspartate (NMDA) receptor antagonist memantine (...) To increase the probability of including only well-defined AD or VaD cases, a validated algorithm was applied (...) this algorithm was based on recordings of specific dementia tests [e.g. Mini-Mental State Examination (MMSE), Clock Drawing Test (CDT), or Abbreviated Mental Test (7-Minute Screen)], referrals to specialists (e.g. neurologists, geriatricians or psycho-geriatricians), brain imaging [computed tomography (CT), magnetic resonance imaging (MRI), or single photon emission computed tomography (SPECT)], or dementia symptoms (memory impairment, aphasia, apraxia, or agnosia) supportive of a diagnosis of a specific dementia subtype (i.e. AD or VaD)." | No                      | Yes<br><br>GP questionnaire                                                               | At least three years of active history in the database before diagnosis // ND | Considered incident cases during the study period only | -     |
| Jick, 2000 [60]             | Statins and the risk of dementia                                                                            | Nested case control study | CPRD        | 1992-1998            | First time diagnosis of dementia or Alzheimer's disease                                                                                                                                                                                                                                                                                                                                                                                                                                                                                                                                                                                                                                                                                                                                                                                                                                                                                                                                         | No                      | No but refers to previous study where the validity of the same list of codes was assessed | None stated                                                                   | Incidence cases considered only                        | -     |

| Author, year of publication | Study title                                                                                           | Type of study | Database(s) | Study period (years) | Outcome description                                                                    | List of codes available                          | Validation of list of codes                                      | EHR-related eligibility criteria for the study // Follow up requirements                                                            | Handling of outcomes occurring prior to exposure                              | Notes |
|-----------------------------|-------------------------------------------------------------------------------------------------------|---------------|-------------|----------------------|----------------------------------------------------------------------------------------|--------------------------------------------------|------------------------------------------------------------------|-------------------------------------------------------------------------------------------------------------------------------------|-------------------------------------------------------------------------------|-------|
| Judge, 2017 [61]            | Protective effect of anti-rheumatic drugs on dementia in rheumatoid arthritis patients                |               | CPRD        | 1995-2011            | Dementia, including Alzheimer's dementia, vascular dementia, and mixed dementia.       | Yes                                              | No                                                               | At least one year of up to standard registration data before the index date<br>//<br>ND                                             | Considered incident cases only                                                | -     |
| Khan, 2011 [62]             | Long-term health outcomes in a British cohort of breast, colorectal and prostate cancer survivors     | Cohort study  | CPRD        | 2003-2006            | Dementia, defined with Read codes, not further specified                               | No; states that codes are available upon request | No                                                               | None stated                                                                                                                         | Only incident cases were considered                                           | -     |
| Khosrow-Khavar, 2017 [63]   | Androgen deprivation therapy and the risk of dementia in patients with prostate cancer                | Cohort study  | CPRD        | 1988-2016            | All incident cases of dementia, including Alzheimer's disease                          | Yes                                              | None stated (refers to validation in previous studies)           | Patients with less than 1 year of history in CPRD were excluded<br>//<br>All patients had to have at least 1 year of follow up data | Excluded patients with previous diagnosis of any dementia                     | -     |
| Lu, 2016 [64]               | Gout and the risk of Alzheimer's disease: a population-based, BMI-matched cohort study                | Cohort study  | THIN        | 1995-2013            | Alzheimer's disease                                                                    | Yes                                              | Not in the original study; refers to a previous validation study | None stated                                                                                                                         | First diagnoses only                                                          | -     |
| Mehta, 2017 [65]            | Association of Hypoglycaemia With Subsequent Dementia in Older Patients With Type 2 Diabetes Mellitus | Cohort study  | CPRD        | 2002-2012            | Dementia defined by Read codes; used the same list of codes as another previous study. | No                                               | None stated                                                      | None stated                                                                                                                         | Excluded patients with dementia diagnosed in the year prior to the index date | -     |



| Author, year of publication | Study title                                                                                                                                           | Type of study | Database(s) | Study period (years) | Outcome description                                                                                                                                                                                                          | List of codes available | Validation of list of codes | EHR-related eligibility criteria for the study // Follow up requirements | Handling of outcomes occurring prior to exposure                              | Notes                                                                                              |
|-----------------------------|-------------------------------------------------------------------------------------------------------------------------------------------------------|---------------|-------------|----------------------|------------------------------------------------------------------------------------------------------------------------------------------------------------------------------------------------------------------------------|-------------------------|-----------------------------|--------------------------------------------------------------------------|-------------------------------------------------------------------------------|----------------------------------------------------------------------------------------------------|
| Mehta, 2016 [66]            | Development and validation of the RxDx-Dementia risk index to predict dementia in patients with type 2 diabetes and hypertension                      | Cohort study  | CPRD        | 2003-2012            | Dementia, defined with a previously validated algorithm (refers to previous publication)                                                                                                                                     | No                      | None stated                 | None stated                                                              | Considered incident cases only                                                | Sensitivity analysis include the definition of dementia as clinical diagnosis or drug prescription |
| Perera, 2018 [67]           | Dementia prevalence and incidence in a federation of European Electronic Health Record databases: The European Medical Informatics Framework resource | Cohort study  | THIN        | 2004-2012            | 'Codes that clearly indicated a dementia diagnosis, rather than those that were suggestive'                                                                                                                                  | Yes                     | No                          | None stated                                                              | Not applicable (calculated incidence estimates)                               | -                                                                                                  |
| Qizilbash, 2015 [68]        | BMI and risk of dementia in two million people over two decades: a retrospective cohort study                                                         | Cohort study  | CPRD        | 1992-2007            | "Patients were classified as having dementia if, any of the following terms were recorded during follow-up: dementia, Alzheimer, Lewy body disease, Pick's disease. Dementia recorded on a death certificate was also used." | No                      | None stated                 | None stated                                                              | Excluded patients with dementia diagnosed in the year prior to the index date | -                                                                                                  |
| Seshadri, 2001 [69]         | Postmenopausal estrogen replacement therapy and the risk of Alzheimer disease                                                                         | Cohort study  | CPRD        | 1992-1998            | First-time diagnosis of Alzheimer's disease, senile dementia or presenile dementia                                                                                                                                           | No                      | Yes<br>Case review          | None stated                                                              | Only first time diagnosis were included                                       | -                                                                                                  |

| Author, year of publication | Study title                                                                                                                    | Type of study             | Database(s) | Study period (years) | Outcome description                                                                                                                                                                                                                                                                                                                                                                                                                                                                                      | List of codes available                                          | Validation of list of codes                 | EHR-related eligibility criteria for the study // Follow up requirements                                    | Handling of outcomes occurring prior to exposure                                     | Notes                                     |
|-----------------------------|--------------------------------------------------------------------------------------------------------------------------------|---------------------------|-------------|----------------------|----------------------------------------------------------------------------------------------------------------------------------------------------------------------------------------------------------------------------------------------------------------------------------------------------------------------------------------------------------------------------------------------------------------------------------------------------------------------------------------------------------|------------------------------------------------------------------|---------------------------------------------|-------------------------------------------------------------------------------------------------------------|--------------------------------------------------------------------------------------|-------------------------------------------|
| Strom, 2015 [70]            | Statin therapy and risk of acute memory impairment                                                                             | Nested case-control study | THIN        | 1987-2013            | "The outcome for this study was the onset of acute, reversible memory impairment. Using Read codes Clinical Terms, version 2 (...), we sought codes with descriptions specifically pertaining to memory loss including amnesia, amnesia symptom, memory loss symptom, temporary loss of memory, short-term memory loss, transient global amnesia, drug-induced amnesic syndrome, non-alcoholic amnesic syndrome, amnesia (retrograde), memory lapses, minor memory lapses, and mild memory disturbance." | Yes                                                              | Yes<br>GP questionnaire for a random sample | At least one 365 of registration with the GP practice                                                       | Patients with codes for acute memory loss before the index date were excluded.       | Excluded patients diagnosed with dementia |
| Turner, 2016 [46]           | Ongoing impairments following transient ischaemic attack: retrospective cohort study                                           | Matched-cohort study      | THIN        | 2009-2013            | Read codes for diagnoses (such as 28E0.00: mild cognitive impairment) and symptoms (such as 1B1A.12: memory loss symptom) related to overall cognitive impairment and impaired individual cognitive domains. 'Cognitive impairment included memory, attention, spatial awareness, perception, apraxia and executive functioning impairments but not a diagnosis of dementia.'                                                                                                                            | Not provided in the original study but obtained from the authors | None stated                                 | Patients alive and registered with the practice 1 month after the index date                                | Excluded patients with fatigue recorded on the index date                            | Dementia diagnosis were not included      |
| Walters, 2016 [71]          | Predicting dementia risk in primary care: development and validation of the Dementia risk score using routinely collected data |                           | THIN        | 2000-2011            | Newly recorded dementia diagnoses, including Alzheimer's disease, vascular dementia, and unspecified or mixed dementia.<br><br>Excluding dementia associated with Parkinson's disease, Lewy body dementia, Huntingdon, Picks, HIV and drug induced and alcohol-related dementia.                                                                                                                                                                                                                         | No but available upon request from the authors                   | No                                          | Excluded patients with less than one year of follow up data // follow up restricted to a maximum of 5 years | Excluded patients with dementia, cognitive impairment or memory symptoms at baseline | -                                         |

CPRD – Clinical Practice Research Datalink; GP – general practitioner; HES – Hospital Episodes Statistics; THIN – The Health Improvement Network; ONS – Office for National Statistics.

Table 5. Main characteristics of the eligible studies: fatigue.

| Author, year of publication | Study title                                                                                                                            | Type of study                              | Database(s) | Study period (years)    | Outcome description                                                                                                                                       | List of codes available                                                          | Validation of list of codes | EHR-related eligibility criteria for the study // Follow up requirements                                                      | Handling of outcomes occurring prior to exposure                                                                                                                                                               | Notes                                                                                                             |
|-----------------------------|----------------------------------------------------------------------------------------------------------------------------------------|--------------------------------------------|-------------|-------------------------|-----------------------------------------------------------------------------------------------------------------------------------------------------------|----------------------------------------------------------------------------------|-----------------------------|-------------------------------------------------------------------------------------------------------------------------------|----------------------------------------------------------------------------------------------------------------------------------------------------------------------------------------------------------------|-------------------------------------------------------------------------------------------------------------------|
| Donegan, 2013 [72]          | Bivalent human papillomavirus vaccine and the risk of fatigue syndromes in girls in the UK                                             | Ecological and self-controlled case series | CPRD        | 2000-2011 and 2008-2011 | Chronic fatigue syndrome including chronic fatigue syndrome/myalgic asthenia, post-viral fatigue syndrome, fibromyalgia, and neurasthenia.                | No<br><br>(Obtained from the authors)                                            | None stated                 | None stated //<br>At least one year of follow up available                                                                    | None stated                                                                                                                                                                                                    | Sensitivity analysis considered 'incident fatigue' at the earliest recording of symptoms, referrals or diagnoses. |
| Collin, 2017 [73]           | Trends in the incidence of chronic fatigue syndrome and fibromyalgia in the UK, 2001-2013: a Clinical Practice Research Datalink Study | Descriptive cohort study                   | CPRD        | 2001-2013               | Diagnoses of chronic fatigue syndrome, fibromyalgia, post-viral fatigue syndrome, or asthenia/debility diagnosis or referral to a specialist service      | Yes                                                                              | None stated                 | At least 12 months of up to standard data                                                                                     | Only new first ever diagnosis were considered                                                                                                                                                                  | Symptoms of fatigue were considered separately.                                                                   |
| Gallagher, 2004 [74]        | Incidence of fatigue symptoms and diagnoses presenting in UK primary care from 1990 to 2001.                                           | Descriptive cohort study                   | CPRD        | 1990-2001               | Read codes for diagnosis of chronic fatigue syndrome; post-viral fatigue syndrome; asthenia/debility. Read codes for symptoms were classified separately. | No<br><br>(Stated that was available from the authors but could not be obtained) | None stated                 | Data prior to 1990 not shown due to lower numbers than expected and being the first years of data collection of the database. | Fatigue diagnosis was incident if there was no record of diagnoses in the previous year, with or without previous symptoms; symptoms were incident if there was no symptoms or diagnoses in the previous year. | -                                                                                                                 |
| Hamilton, 2009 [75]         | Risk markers for both chronic fatigue and irritable bowel syndromes: A prospective case-control study in primary care                  | Nested case control study                  | CPRD        | 1988-2001               | List of diagnostic codes for post-viral fatigue syndrome; chronic fatigue syndrome.                                                                       | No<br><br>(refers to another publication)                                        | None stated                 | Only patients with complete records for 3 years prior to the index date were included                                         | Not applicable                                                                                                                                                                                                 | -                                                                                                                 |

1  
2  
3  
4  
5  
6  
7  
8  
9  
10  
11  
12  
13  
14  
15  
16  
17  
18  
19  
20  
21  
22  
23  
24  
25  
26  
27  
28  
29  
30  
31  
32  
33  
34  
35  
36  
37  
38  
39  
40  
41  
42  
43  
44  
45  
46

|                     |                                                                                              |                                  |      |           |                                                                                                                                                                                                  |                                                                                  |             |                                                                                                                                                                                                      |                                                                     |   |
|---------------------|----------------------------------------------------------------------------------------------|----------------------------------|------|-----------|--------------------------------------------------------------------------------------------------------------------------------------------------------------------------------------------------|----------------------------------------------------------------------------------|-------------|------------------------------------------------------------------------------------------------------------------------------------------------------------------------------------------------------|---------------------------------------------------------------------|---|
| Petersen, 2006 [34] | Risk and predictors of fatigue after infectious mononucleosis in a large primary-care cohort | Nested case control cohort study | CPRD | 1989-2000 | Read codes for diagnoses of post-viral debility, post-viral fatigue syndromes, post-influenza debility and syndrome post-viral; symptoms of tiredness, malaise, lethargy, debility, and fatigue. | No<br><br>(Stated that was available from the authors but could not be obtained) | None stated | At least one year of data before diagnosis<br>//<br>At least one year of complete follow up after diagnosis                                                                                          | Included patients who did not have fatigue in the year before onset | - |
| Turner, 2016 [46]   | Ongoing impairments following transient ischaemic attack: retrospective cohort study         | Nested case-cohort study         | THIN | 2009-2013 | First consultation after the index date with a Read code for symptoms or diagnosis of fatigue                                                                                                    | No<br><br>Obtained from the authors                                              | None stated | Practice with at least one year of up to standard data, and patients registered for at least one year with the practice.<br>//<br>Patient alive and registered with the practice 1 month after index | Excluded patients with fatigue recorded on the index date.          | - |

CPRD – Clinical Practice Research Datalink; THIN – The Health Improvement Network.

Review only

Table 6. Main characteristics of the eligible studies: pain.

| Author, year of publication | Study title                                                                                                     | Type of study             | Database(s) | Study period (years) | Outcome description                                                                                                                                                                                                                                                                                                                                                                                                                                                                                                                                                                                                              | List of codes available | Validation of list of codes | EHR-related eligibility criteria for the study // Follow up requirements | Handling of outcomes occurring prior to exposure | Notes |
|-----------------------------|-----------------------------------------------------------------------------------------------------------------|---------------------------|-------------|----------------------|----------------------------------------------------------------------------------------------------------------------------------------------------------------------------------------------------------------------------------------------------------------------------------------------------------------------------------------------------------------------------------------------------------------------------------------------------------------------------------------------------------------------------------------------------------------------------------------------------------------------------------|-------------------------|-----------------------------|--------------------------------------------------------------------------|--------------------------------------------------|-------|
| Becker, 2007 [76]           | Migraine incidence, comorbidity and health resource utilization in the UK                                       | Nested case-control study | CPRD        | 1994-2001            | <u>Migraine diagnosis</u>                                                                                                                                                                                                                                                                                                                                                                                                                                                                                                                                                                                                        | No                      | Yes<br><br>GP questionnaire | None stated                                                              | First-time diagnosis only                        | -     |
| Campbell, 2015 [77]         | In sickness and in health: A cross-sectional analysis of concordance for musculoskeletal pain in 13,507 couples | Descriptive               | CiPCA       | 2005-2006            | <u>Widespread body pain:</u><br>"All relevant codes were formed into the five most common consultation body regions (back, knee, neck, shoulder, foot), as well as codes for osteoarthritis consultations. A further category of 'any musculoskeletal' consultations were formed inclusive of the above body regions and conditions, as well as consultations for unspecified pain (e.g. arthralgia), widespread pain conditions and other single body regions where the proportion of consultations were too few to perform meaningful separate analysis (e.g. head, arm, elbow, wrist, hand, hip, pelvis, thigh and buttock)." | Yes                     | None stated                 | None stated                                                              | None stated                                      | -     |

1  
2  
3  
4  
5  
6  
7  
8  
9  
10  
11  
12  
13  
14  
15  
16  
17  
18  
19  
20  
21  
22  
23  
24  
25  
26  
27  
28  
29  
30  
31  
32  
33  
34  
35  
36  
37  
38  
39  
40  
41  
42  
43  
44  
45  
46

| Author, year of publication | Study title                                                                     | Type of study | Database(s) | Study period (years) | Outcome description                                                                                                                                                                                                                                                                                                                                                                                                                                                                                                                                                                                                                                                                                                                                                                                                                                                                | List of codes available | Validation of list of codes | EHR-related eligibility criteria for the study // Follow up requirements | Handling of outcomes occurring prior to exposure | Notes |
|-----------------------------|---------------------------------------------------------------------------------|---------------|-------------|----------------------|------------------------------------------------------------------------------------------------------------------------------------------------------------------------------------------------------------------------------------------------------------------------------------------------------------------------------------------------------------------------------------------------------------------------------------------------------------------------------------------------------------------------------------------------------------------------------------------------------------------------------------------------------------------------------------------------------------------------------------------------------------------------------------------------------------------------------------------------------------------------------------|-------------------------|-----------------------------|--------------------------------------------------------------------------|--------------------------------------------------|-------|
| Hall, 2006 [78]             | Epidemiology and treatment of neurophatic pain: the UK primary care perspective | Descriptive   | CPRD        | 1992-2002            | "A <u>post-herpetic neuralgia</u> record was a specific term for post-herpetic neuralgia or an acute herpes zoster term plus either neuropathy, or neuropathic pain, 3-6 months after the first acute herpes zoster entry. A <u>trigeminal neuralgia</u> record had a specific term for this diagnosis. <u>Phantom limb pain</u> was defined as a specific term or a term for amputation plus either a neuropathy or neuropathic pain record 3–24 months after the first amputation code. Patients were included in the painful <u>diabetic neuropathy</u> cohort if their record contained a specific term; a term for diabetic neuropathy with a prescription for a treatment for pain current at the date of diagnosis; a record of diabetes and neuropathic pain or record of diabetes and both neuralgia and a treatment for pain current on the date of the neuralgia code." | No                      | None stated                 | At least year of up to standard data                                     | None stated                                      | -     |

1  
2  
3  
4  
5  
6  
7  
8  
9  
10  
11  
12  
13  
14  
15  
16  
17  
18  
19  
20  
21  
22  
23  
24  
25  
26  
27  
28  
29  
30  
31  
32  
33  
34  
35  
36  
37  
38  
39  
40  
41  
42  
43  
44  
45  
46

| Author, year of publication | Study title                                                                                                         | Type of study             | Database(s) | Study period (years) | Outcome description                                                                                                                                                                                                                                                                                                                                                                                                                                                                                                                                                                                                                                                                                                                                                                                                                                                                                                                                                                                                                                                                                                                                                                                                  | List of codes available | Validation of list of codes  | EHR-related eligibility criteria for the study // Follow up requirements | Handling of outcomes occurring prior to exposure | Notes       |
|-----------------------------|---------------------------------------------------------------------------------------------------------------------|---------------------------|-------------|----------------------|----------------------------------------------------------------------------------------------------------------------------------------------------------------------------------------------------------------------------------------------------------------------------------------------------------------------------------------------------------------------------------------------------------------------------------------------------------------------------------------------------------------------------------------------------------------------------------------------------------------------------------------------------------------------------------------------------------------------------------------------------------------------------------------------------------------------------------------------------------------------------------------------------------------------------------------------------------------------------------------------------------------------------------------------------------------------------------------------------------------------------------------------------------------------------------------------------------------------|-------------------------|------------------------------|--------------------------------------------------------------------------|--------------------------------------------------|-------------|
| Hall, 2013 [79]             | An observational descriptive study of the epidemiology and treatment of neuropathic pain in a UK general population | Cohort study, descriptive | CPRD        | 2005-2010            | “Five neuropathic pain cohorts ( <u>post-herpetic neuralgia</u> , <u>painful diabetic neuropathy</u> , <u>phantom limb pain</u> , <u>neuropathic back pain</u> and <u>neuropathic postoperative pain</u> ) were identified from (...) a single specific Read code, or a combination of Read and therapy codes as specified in a case definition. Postherpetic neuralgia was defined as a specific code for post-herpetic neuralgia, or a code for acute zoster plus either a code for neuropathy, or neuropathic pain, between three and six months after the first acute zoster entry. Phantom limb pain (PLP) was defined as a specific code, or a code for amputation plus either a code for neuropathy or neuropathic pain between three and twenty-four months after the first amputation code. The painful diabetic neuropathy cohort included patients with a specific code for painful diabetic neuropathy; those with a code for diabetes and a general code for neuropathic pain and a third group with a code for diabetic neuropathy (or diabetes and neuralgia) with a prescription for a neuropathic pain treatment which was initiated within 28 days of the date of the neuropathy/ neuralgia code.” | No                      | Yes<br><br>GP questionnaires | At least of 1 year of data of good quality for research                  |                                                  | None stated |

1  
2  
3  
4  
5  
6  
7  
8  
9  
10  
11  
12  
13  
14  
15  
16  
17  
18  
19  
20  
21  
22  
23  
24  
25  
26  
27  
28  
29  
30  
31  
32  
33  
34  
35  
36  
37  
38  
39  
40  
41  
42  
43  
44  
45  
46

| Author, year of publication | Study title                                                                        | Type of study        | Database(s) | Study period (years) | Outcome description                                                                                                                                                                                                                                                                                                                                                                                                                                                                                                                                                                                                                                | List of codes available | Validation of list of codes | EHR-related eligibility criteria for the study // Follow up requirements                                                    | Handling of outcomes occurring prior to exposure                                                                                     | Notes |
|-----------------------------|------------------------------------------------------------------------------------|----------------------|-------------|----------------------|----------------------------------------------------------------------------------------------------------------------------------------------------------------------------------------------------------------------------------------------------------------------------------------------------------------------------------------------------------------------------------------------------------------------------------------------------------------------------------------------------------------------------------------------------------------------------------------------------------------------------------------------------|-------------------------|-----------------------------|-----------------------------------------------------------------------------------------------------------------------------|--------------------------------------------------------------------------------------------------------------------------------------|-------|
| Mansfield, 2017 [80]        | Identifying patients with chronic widespread pain in primary care                  | Cross sectional      | CiPCA       | 2005-2009            | (A) <u>Recurrent region pain</u> , define as: "In a period of 5 consecutive years, a patient fulfils all of 1-4:<br>1. At least 1 consultation for a musculoskeletal complaint in the axial skeleton (neck and back);<br>2. At least 1 consultation for an upper- or lower-limb complaint;<br>3. At least 1 consultation for a regional musculoskeletal complaint in each of 3 separate years;<br>4. At least 4 consultations for regional musculoskeletal complaints during the 5-year period."<br><br>(B) "Non specific <u>generalized pain conditions</u> , including fibromyalgia, fibrositis, rheumatism, myalgia, arthralgia, and polyalgia" | Yes                     | Yes                         | Patients not registered with the practice for the full 5-year period were excluded                                          | Not applicable (cross sectional analysis)                                                                                            | -     |
| Ruigomez, 2006 [81]         | Chest pain in general practice: incidence, comorbidity and mortality               | Case control study   | CPRD        | 1996                 | <u>Chest pain:</u><br>Codes for chest pain that did specify the type or location of the symptom.                                                                                                                                                                                                                                                                                                                                                                                                                                                                                                                                                   | Yes                     | None stated                 | Registered with the GP for at least 2 years<br>//<br>At least one entry in the records in the last 3 years before the study | Excluded patients with history of pain the past 2 years                                                                              | -     |
| Wallander, 2007 [82]        | Unspecified abdominal pain in primary care: The role of gastrointestinal morbidity | Matched cohort study | CPRD        | Before 1996          | <u>Abdominal pain:</u><br>Diagnosis of abdominal pain                                                                                                                                                                                                                                                                                                                                                                                                                                                                                                                                                                                              | Yes                     | None stated                 | At least one entry to the data in the three years prior to the study start.                                                 | Patients were excluded if they had a record of abdominal pain of any abdominal site or type in the 2 years before the study started. | -     |



1  
2  
3  
4  
5  
6  
7  
8  
9  
10  
11  
12  
13  
14  
15  
16  
17  
18  
19  
20  
21  
22  
23  
24  
25  
26  
27  
28  
29  
30  
31  
32  
33  
34  
35  
36  
37  
38  
39  
40  
41  
42  
43  
44  
45  
46

| Author, year of publication                                                                                                                          | Study title                                                                                                         | Type of study | Database(s)                       | Study period (years) | Outcome description                                                                                                                                                                                                                                                                                                                                                                                                                                                                                                                                                                                                                                                                                                                                                                                                                                                                                                                                             | List of codes available | Validation of list of codes | EHR-related eligibility criteria for the study // Follow up requirements | Handling of outcomes occurring prior to exposure                                                              | Notes |
|------------------------------------------------------------------------------------------------------------------------------------------------------|---------------------------------------------------------------------------------------------------------------------|---------------|-----------------------------------|----------------------|-----------------------------------------------------------------------------------------------------------------------------------------------------------------------------------------------------------------------------------------------------------------------------------------------------------------------------------------------------------------------------------------------------------------------------------------------------------------------------------------------------------------------------------------------------------------------------------------------------------------------------------------------------------------------------------------------------------------------------------------------------------------------------------------------------------------------------------------------------------------------------------------------------------------------------------------------------------------|-------------------------|-----------------------------|--------------------------------------------------------------------------|---------------------------------------------------------------------------------------------------------------|-------|
| Zondervan, 1999 [83]                                                                                                                                 | Prevalence and incidence of chronic pelvic pain in primary care: evidence from a national general practice database | Cohort study  | Mediplus UK primary care database | 1991-1995            | <p><b>Chronic pelvic pain:</b> pain in the lower abdominal region persisting for at least six months.</p> <p>“Episode of chronic pelvic pain: pelvic pain on two or more contacts, with at least six months (<math>\geq 183</math> days) between the first and the last contact but with no period of more than one year (<math>&gt; 365</math> days) without a pelvic pain contact. An episode of chronic pelvic pain was defined as starting six months after the first contact and finishing at the contact preceding a pain-free, one-year interval (if any).”</p> <p>“Excluded pain due to malignancy; chronic inflammatory and other defined bowel diseases such as Crohn’s, coeliac disease, ulcerative colitis; acute conditions verified by having surgery such as appendectomy, cholecystectomy; or pregnancy. Women with pelvic pain occurring only during menstruation (dysmenorrhoea) or sexual intercourse (dyspareunia) were also excluded.”</p> | No                      | None stated                 | None stated                                                              | Not applicable. Monthly incidence estimated as the number of new episodes in a given month as a proportion of | -     |
| <p>CiPCA - The Consultations in Primary Care Archive; CPRD – Clinical Practice Research Datalink;. NSAIDS - Nonsteroidal anti-inflammatory drug.</p> |                                                                                                                     |               |                                   |                      |                                                                                                                                                                                                                                                                                                                                                                                                                                                                                                                                                                                                                                                                                                                                                                                                                                                                                                                                                                 |                         |                             |                                                                          |                                                                                                               |       |

Table 7. Main characteristics of the eligible studies: sexual dysfunction.

| Author, year of publication | Study title                                                                                                                                                                                           | Type of study             | Database(s) | Study period (years) | Outcome description                                                                                                                                                                                                                                                                                                                                                                                                                                                                                                                                               | List of codes available | Validation of list of codes | EHR-related eligibility criteria for the study // Follow up requirements  | Handling of outcomes occurring prior to exposure                           | Notes |
|-----------------------------|-------------------------------------------------------------------------------------------------------------------------------------------------------------------------------------------------------|---------------------------|-------------|----------------------|-------------------------------------------------------------------------------------------------------------------------------------------------------------------------------------------------------------------------------------------------------------------------------------------------------------------------------------------------------------------------------------------------------------------------------------------------------------------------------------------------------------------------------------------------------------------|-------------------------|-----------------------------|---------------------------------------------------------------------------|----------------------------------------------------------------------------|-------|
| Blumentals, 2003 [84]       | Antihypertensive treatment and erectile dysfunction in a cohort of type II diabetes patients                                                                                                          | Nested case-control study | CPRD        | 1987-2001            | Erectile dysfunction, ascertained from the diagnosis codes, not further specified                                                                                                                                                                                                                                                                                                                                                                                                                                                                                 | No                      | None stated                 | None stated                                                               | None stated                                                                | -     |
| Hagberg, 2016 [85]          | Risk of erectile dysfunction associated with use of 5-alpha reductase inhibitors for benign prostatic hyperplasia or alopecia: population based studies using the Clinical Practice Research Datalink | Nested case control study | CPRD        | 1992-2011            | <u>Erectile dysfunction</u> : "diagnosis of erectile dysfunction or impotence, prescription for a phosphodiesterase type 5 inhibitor (eg, sildenafil, tadalafil, or vardenafil) where the strength and quantity prescribed was indicated for treatment of erectile dysfunction, or record of procedures for treatment of erectile dysfunction (eg, penile prosthesis, penile injection, or other operations for treatment of erectile dysfunction)."<br><u>Non-erectile dysfunction</u> : including ejaculatory disorder, psychosexual dysfunction, or low libido | No                      | None stated                 | At least 3 years of history before the cohort entry date;                 | Incident cases considered after the index date.                            | -     |
| Khan, 2011 [82]             | Long-term health outcomes in a British cohort of breast, colorectal and prostate cancer survivors: a database study                                                                                   | Cohort study              | CPRD        | 2003-2006            | Erectile dysfunction: "new prescriptions for sildenafil (Viagra, Pfizer, NY, United States), apomorphine hydrochloride, vardenafil (Levitra, Bayer Healthcare Pharmaceuticals, New Haven, USA), alprostadil (an injectable treatment) and tadalafil (Cialis, Lilly, USA)"                                                                                                                                                                                                                                                                                         | No                      | None stated                 | None stated                                                               | Excluded patients with erectile dysfunction recorded before the index date | -     |
| Morant, 2008 [86]           | Increased sexual dysfunction in men with storage and voiding lower urinary tract symptoms                                                                                                             | Cross-sectional analysis  | THIN        | 2000-2007            | Male sexual dysfunction                                                                                                                                                                                                                                                                                                                                                                                                                                                                                                                                           | Yes                     | None stated                 | None stated                                                               | None stated                                                                | -     |
| Schlesinger, 2018 [87]      | Gout and the Risk of Incident Erectile Dysfunction: A Body Mass Index-matched Population-based Study                                                                                                  | Cohort study              | THIN        | 1995-2012            | Erectile dysfunction noted by the presence of the Read code E227311                                                                                                                                                                                                                                                                                                                                                                                                                                                                                               | Yes                     | None stated                 | At least one year of registration with the practice before the index date | Excluded prevalent cases at baseline                                       | -     |

1  
2  
3  
4  
5  
6  
7  
8  
9  
10  
11  
12  
13  
14  
15  
16  
17  
18  
19  
20  
21  
22  
23  
24  
25  
26  
27  
28  
29  
30  
31  
32  
33  
34  
35  
36  
37  
38  
39  
40  
41  
42  
43  
44  
45  
46

| Author, year of publication | Study title                                                                            | Type of study | Database(s) | Study period (years) | Outcome description                                                             | List of codes available | Validation of list of codes | EHR-related eligibility criteria for the study // Follow up requirements | Handling of outcomes occurring prior to exposure                                                                                 | Notes |
|-----------------------------|----------------------------------------------------------------------------------------|---------------|-------------|----------------------|---------------------------------------------------------------------------------|-------------------------|-----------------------------|--------------------------------------------------------------------------|----------------------------------------------------------------------------------------------------------------------------------|-------|
| Sultan, 2017 [88]           | Gout and subsequent erectile dysfunction: a population-based cohort study from England | Cohort study  | CPRD, HES   | 1998-2004            | Erectile dysfunction, ascertained from the medical codes, not further specified | Yes                     | None stated                 | At least 1 year of follow up data                                        | Only incident cases after the index date were considered; cases in the first 6 months of registration were considered prevalent. | -     |

CPRD – Clinical Practice Research Datalink; HES – Hospital Episodes Statistics; THIN – The Health Improvement Network.

**Table 8. Main characteristics of the eligible studies: sleep disorder.**

| Author,<br>year of<br>publication                              | Study title                                                    | Type of study                                                  | Database(s)                                                    | Study<br>period<br>(years)                                     | Outcome description                                            | List of<br>codes<br>available                                  | Validation<br>of list of<br>codes                              | EHR-related<br>eligibility criteria<br>for the study<br>//<br>Follow up<br>requirements | Handling of<br>outcomes<br>occurring prior<br>to exposure      | Notes                                                          |
|----------------------------------------------------------------|----------------------------------------------------------------|----------------------------------------------------------------|----------------------------------------------------------------|----------------------------------------------------------------|----------------------------------------------------------------|----------------------------------------------------------------|----------------------------------------------------------------|-----------------------------------------------------------------------------------------|----------------------------------------------------------------|----------------------------------------------------------------|
| 10<br>11<br>12<br>13<br>14<br>15<br>16<br>17<br>18<br>19<br>20 | 10<br>11<br>12<br>13<br>14<br>15<br>16<br>17<br>18<br>19<br>20 | 10<br>11<br>12<br>13<br>14<br>15<br>16<br>17<br>18<br>19<br>20 | 10<br>11<br>12<br>13<br>14<br>15<br>16<br>17<br>18<br>19<br>20 | 10<br>11<br>12<br>13<br>14<br>15<br>16<br>17<br>18<br>19<br>20 | 10<br>11<br>12<br>13<br>14<br>15<br>16<br>17<br>18<br>19<br>20 | 10<br>11<br>12<br>13<br>14<br>15<br>16<br>17<br>18<br>19<br>20 | 10<br>11<br>12<br>13<br>14<br>15<br>16<br>17<br>18<br>19<br>20 | 10<br>11<br>12<br>13<br>14<br>15<br>16<br>17<br>18<br>19<br>20                          | 10<br>11<br>12<br>13<br>14<br>15<br>16<br>17<br>18<br>19<br>20 | 10<br>11<br>12<br>13<br>14<br>15<br>16<br>17<br>18<br>19<br>20 |
| 10<br>11<br>12<br>13<br>14<br>15<br>16<br>17<br>18<br>19<br>20 | 10<br>11<br>12<br>13<br>14<br>15<br>16<br>17<br>18<br>19<br>20 | 10<br>11<br>12<br>13<br>14<br>15<br>16<br>17<br>18<br>19<br>20 | 10<br>11<br>12<br>13<br>14<br>15<br>16<br>17<br>18<br>19<br>20 | 10<br>11<br>12<br>13<br>14<br>15<br>16<br>17<br>18<br>19<br>20 | 10<br>11<br>12<br>13<br>14<br>15<br>16<br>17<br>18<br>19<br>20 | 10<br>11<br>12<br>13<br>14<br>15<br>16<br>17<br>18<br>19<br>20 | 10<br>11<br>12<br>13<br>14<br>15<br>16<br>17<br>18<br>19<br>20 | 10<br>11<br>12<br>13<br>14<br>15<br>16<br>17<br>18<br>19<br>20                          | 10<br>11<br>12<br>13<br>14<br>15<br>16<br>17<br>18<br>19<br>20 | 10<br>11<br>12<br>13<br>14<br>15<br>16<br>17<br>18<br>19<br>20 |

CPRD – Clinical Practice Research Datalink; CiPCA - The Consultations in Primary Care Archive; PiPCA - The Prescriptions in Primary Care Archive.

**Table 9. Main characteristics of the eligible studies: fatal and non-fatal self-harm.**

| Author, year of publication | Study title                                                                            | Type of study             | Database(s) | Study period (years) | Outcome description                                                                                                                                                                                                                                                                                                                                                                                                                                                                                                                                                                                                                                                         | List of codes available | Validation of list of codes                                  | EHR-related eligibility criteria for the study // Follow up requirements                                            | Handling of outcomes occurring prior to exposure (applicable to self-harm only) | Notes                                                                                                                            |
|-----------------------------|----------------------------------------------------------------------------------------|---------------------------|-------------|----------------------|-----------------------------------------------------------------------------------------------------------------------------------------------------------------------------------------------------------------------------------------------------------------------------------------------------------------------------------------------------------------------------------------------------------------------------------------------------------------------------------------------------------------------------------------------------------------------------------------------------------------------------------------------------------------------------|-------------------------|--------------------------------------------------------------|---------------------------------------------------------------------------------------------------------------------|---------------------------------------------------------------------------------|----------------------------------------------------------------------------------------------------------------------------------|
| Andersohn, 2010 [91]        | Use of antiepileptic drugs in epilepsy and the risk of self-harm or suicidal behaviour | Nested case-control study | CPRD        | 1990-2005            | "Potential cases were identified using predefined medical codes of self-harm (i.e., without a clear suicidal intention [intentional self-harm]) or suicidal behaviour (i.e., with a clear suicidal intention [attempted suicide]). Patients who died were also considered as potential cases if suicidal thoughts were recorded within 4 weeks before death."                                                                                                                                                                                                                                                                                                               | Yes                     | Yes, record review                                           | At least one year of data with the GP practice                                                                      | Models adjusted for history of self-harm at baseline                            | In an additional analysis, the patients with codes for self-harm without explicitly mention to suicidal behaviour were excluded. |
| Arana, 2010 [92]            | Suicide-related events in patients treated with antiepileptic drugs                    | Cohort study              | THIN        | 1988-2008            | "Cases of suicide-related events were based on codes for suicide, attempted suicide, and intentional self-inflicted injuries plus suicide. A completed suicide was defined as a code for suicidality followed by a code for death in the following month and a final date of any administrative activity in the database or disenrollment within 6 months after the suicidality code. If the disenrollment date occurred more than 6 months after a suicidality code, we reviewed the patient's profile. Patients with a last medical or other health related code that was recorded within 1 month after the suicide date were also considered to have completed suicide." | No                      | Yes<br>GP questionnaire, record and death certificate review | Patients were eligible if they were enrolled with a clinical practice for at least 6 months during the study period | Patients with personal or family history of suicide attempt were excluded       | -                                                                                                                                |
| Garr, 2016 [93]             | The epidemiology of self-harm in a UK-wide primary care patient cohort, 2001-2013      | Descriptive cohort study  | CPRD        | 2001-2013            | "Read codes incorporating all cases across the spectrum from milder forms of non-suicidal behaviour through to near-fatal suicide attempts (...) We excluded codes that referred only to thoughts of self-harm or suicidal ideation and alcohol-related codes, unless intent to actively harm oneself was specified."                                                                                                                                                                                                                                                                                                                                                       | Yes                     | None stated                                                  | None stated                                                                                                         | None stated                                                                     | None stated                                                                                                                      |

1  
2

| 3<br>4<br>5<br>6<br>7                                    | Author,<br>year of<br>publication | Study title                                                                                                                                                          | Type of study                | Database(s)       | Study<br>period<br>(years) | Outcome description                                                                                                                                                            | List of<br>codes<br>available                              | Validation<br>of list of<br>codes                                     | EHR-related<br>eligibility<br>criteria<br>for the study<br>//<br>Follow up<br>requirements                                                                          | Handling of<br>outcomes<br>occurring<br>prior to<br>exposure<br>(applicable<br>to self-harm<br>only)              | Notes                                                                                                           |
|----------------------------------------------------------|-----------------------------------|----------------------------------------------------------------------------------------------------------------------------------------------------------------------|------------------------------|-------------------|----------------------------|--------------------------------------------------------------------------------------------------------------------------------------------------------------------------------|------------------------------------------------------------|-----------------------------------------------------------------------|---------------------------------------------------------------------------------------------------------------------------------------------------------------------|-------------------------------------------------------------------------------------------------------------------|-----------------------------------------------------------------------------------------------------------------|
| 8<br>9<br>10<br>11<br>12<br>13<br>14<br>15               | Carr, 2017<br>[94]                | Premature Death<br>Among Primary Care<br>Patients With a History<br>of Self-Harm                                                                                     | Cohort study                 | CPRD<br>ONS       | 2001-2013                  | Suicide, ascertained with ICD-10<br>codes in the ONS mortality data;<br>including open verdicts.                                                                               | Yes                                                        | Not<br>applicable                                                     | At least one year<br>of registration with<br>the practice prior<br>to the index date;                                                                               | Not applicable.                                                                                                   | -                                                                                                               |
| 16<br>17<br>18<br>19<br>20<br>21<br>22                   | Coupland,<br>2011 [95]            | Antidepressant use and<br>risk of adverse<br>outcomes in older<br>people: Population<br>based cohort study                                                           | Cohort study                 | QResearch,<br>ONS | 1996-2007                  | Read codes for attempted suicide or<br>self-harm, not further specified                                                                                                        | No                                                         | None<br>stated                                                        | At least one year<br>of registration with<br>the practice prior<br>to the index date;                                                                               | None stated                                                                                                       | Suicide was also<br>an outcome, but<br>data for this<br>outcome was<br>not analysed<br>due to small<br>numbers. |
| 23<br>24<br>25<br>26<br>27<br>28<br>29<br>30<br>31<br>32 | Coupland,<br>2015 [96]            | Antidepressant use and<br>risk of suicide and<br>attempted suicide or<br>self-harm in people aged<br>20 to 64: cohort study<br>using a primary care<br>database      | Cohort study                 | QResearch,<br>ONS | 2000-2011                  | code for suicide or an open verdict<br>in their linked death certificate, or<br>patients who had a Read code for<br>attempted suicide or self-harm who<br>died within 30 days. | No<br><br>(refers to<br>codes used<br>in other<br>studies) | None<br>stated                                                        | At least one year<br>of registration with<br>the practice prior<br>to the index date;<br>//<br>Most analysis<br>restricted to the<br>first 5 years of<br>follow up. | Excluded<br>patients with a<br>previous<br>attempted<br>suicide or self-<br>harm event<br>recorded at<br>baseline | -                                                                                                               |
| 33<br>34<br>35<br>36<br>37<br>38                         | Bardet, 2012<br>[2]               | Suicidal behavior and<br>severe neuropsychiatric<br>disorders following<br>glucocorticoid therapy in<br>primary care                                                 | Cohort study                 | THIN              | 1990-2008                  | Cases of suicide or suicide attempt                                                                                                                                            | No                                                         | Yes<br><br>Review of<br>death<br>certificates                         | ≥6 months of<br>registration with<br>the primary care<br>practice                                                                                                   | Hazards ratios<br>adjusted for past<br>history of<br>neuropsychiatric<br>disorders<br>(yes/no)                    | Outcome was<br>eligible if there<br>was no record of<br>the outcome in<br>the previous 6<br>months              |
| 39<br>40<br>41<br>42<br>43<br>44<br>45<br>46             | Donovan,<br>1996 [97]             | The use of the General<br>Practice Research<br>Database (GPRD) to<br>examine potential links<br>between antidepressant<br>medication and the<br>incidence of suicide | Cohort study                 | CPRD              | 1988-1993                  | Suicide, not further specified                                                                                                                                                 | No                                                         | None<br>stated                                                        | None stated                                                                                                                                                         | Prior suicidal<br>history<br>considered as a<br>risk factor for<br>suicide                                        | -                                                                                                               |
|                                                          | Boyle, 2016<br>[98]               | Suicide risk in primary<br>care patients diagnosed<br>with a personality<br>disorder: a nested case<br>control study                                                 | Nested case<br>control study | CPRD, ONS         | 2002-2011                  | Suicides and open verdicts<br>ascertained via linkage to ONS<br>mortality data                                                                                                 | Yes<br><br>(ICD-10<br>codes)                               | Not<br>applicable<br><br>(Data<br>linked to<br>the gold-<br>standard) | At least one year<br>of up to standard<br>CPRD data                                                                                                                 | Not applicable                                                                                                    | -                                                                                                               |

1  
2

| 3 Author,<br>4 year of<br>5 publication | 6 Study title                                                                                                                                                             | 7 Type of study | 8 Database(s) | 9 Study<br>period<br>(years) | 10 Outcome description                                                                                                                                                                                                                                                                                                                                                                                                                                                                                                                                                                                                                                                                                                                                                                                                                                                                                                                                                                                                  | 11 List of<br>codes<br>available | 12 Validation<br>of list of<br>codes | 13 EHR-related<br>eligibility criteria<br>for the study<br>//<br>14 Follow up<br>requirements | 15 Handling of<br>outcomes<br>occurring prior<br>to exposure<br>(applicable to<br>self-harm only)                                                 | 16 Notes |
|-----------------------------------------|---------------------------------------------------------------------------------------------------------------------------------------------------------------------------|-----------------|---------------|------------------------------|-------------------------------------------------------------------------------------------------------------------------------------------------------------------------------------------------------------------------------------------------------------------------------------------------------------------------------------------------------------------------------------------------------------------------------------------------------------------------------------------------------------------------------------------------------------------------------------------------------------------------------------------------------------------------------------------------------------------------------------------------------------------------------------------------------------------------------------------------------------------------------------------------------------------------------------------------------------------------------------------------------------------------|----------------------------------|--------------------------------------|-----------------------------------------------------------------------------------------------|---------------------------------------------------------------------------------------------------------------------------------------------------|----------|
| 17 Gao, 2013<br>18 [99]                 | 19 Association between<br>20 body mass index and<br>21 suicide, and suicide<br>22 attempt among British<br>23 adults: The health<br>24 improvement network<br>25 database | 26 Cohort study | 27 THIN       | 28 2000-2007                 | 29 Suicide: "defined in two ways (...): 1)<br>30 patients with a Read code of suicide<br>31 attempt confirmed by death within 3<br>32 months or 2) patients who did not<br>33 have a Read code of suicide<br>34 attempt, but whose cause of death<br>35 might be suicide. To identify patients<br>36 using the second approach, we first<br>37 searched for all deaths (...) the<br>38 cause of death was reviewed. In<br>39 addition, free text records were<br>40 searched for potential suicide as<br>41 cause of death, including suicide,<br>42 deliberate drug overdose or self-<br>43 harm, self-inflicted injuries,<br>44 poisoning, asphyxiation, trauma, and<br>45 acute or multiple organ failure.<br>46 Death certificates for these patients<br>were requested for the final verdict<br>of the cause of death.<br><br>Suicide attempt: "identified using the<br>Read codes for suicide and then by<br>confirming that the patient was still<br>alive for at least 3 months from the<br>time of the event." | 47 No                            | 48 None<br>stated                    | 49 None stated                                                                                | 50 None stated                                                                                                                                    | 51 -     |
| 52 Gunnell,<br>53 2009 [19]             | 54 Varenicline and suicidal<br>55 behaviour: a cohort<br>56 study based on data<br>57 from the General<br>58 Practice Research<br>59 Database                             | 60 Cohort study | 61 CPRD       | 62 2006-2008                 | 63 OXMIS and Read terms for fatal and<br>64 non-fatal self-harm.                                                                                                                                                                                                                                                                                                                                                                                                                                                                                                                                                                                                                                                                                                                                                                                                                                                                                                                                                        | 65 No                            | 66 Yes<br><br>67 Record<br>68 review | 69 At least 1 years of<br>70 CPRD records<br>71 before index date;                            | 72 Considered the<br>73 potential<br>74 confounding<br>75 effect of<br>76 previous self-<br>77 harm or suicidal<br>78 thoughts in<br>79 analysis. | 80 -     |

36  
37  
38  
39  
40  
41  
42  
43  
44  
45  
46

1  
2

| 3Author,<br>4year of<br>5publication | 6Study title                                                                                                                                                                              | 7Type of study   | 8Database(s) | 9Study<br>period<br>(years) | 10Outcome description                                                                                                                                                                                                                                                                                                                                                                                                                                                                          | 11List of<br>codes<br>available | 12Validation<br>of list of<br>codes                            | 13EHR-related<br>eligibility criteria<br>for the study<br>//<br>14Follow up<br>requirements | 15Handling of<br>outcomes<br>occurring prior<br>to exposure<br>(applicable to<br>self-harm only)                                                                      | 16Notes |
|--------------------------------------|-------------------------------------------------------------------------------------------------------------------------------------------------------------------------------------------|------------------|--------------|-----------------------------|------------------------------------------------------------------------------------------------------------------------------------------------------------------------------------------------------------------------------------------------------------------------------------------------------------------------------------------------------------------------------------------------------------------------------------------------------------------------------------------------|---------------------------------|----------------------------------------------------------------|---------------------------------------------------------------------------------------------|-----------------------------------------------------------------------------------------------------------------------------------------------------------------------|---------|
| 8Hall, 2009<br>9[100]                | Validation of death and<br>suicide recording on the<br>THIN UK primary care<br>database                                                                                                   | Validation study | THIN         | 2002-2004                   | “Coded and free text records were<br>searched to identify any entry for<br>suicide or a medical cause of death<br>which might indicate suicide,<br>including trauma, poisoning,<br>overdose, asphyxiation, acute or<br>multiple organ failure or a<br>suggestion that death was<br>intentional. An electronic record of<br>suicide was accepted.”                                                                                                                                              | Yes                             | Yes<br><br>(Validation<br>study,<br>record<br>review)          | None stated                                                                                 | Not applicable<br>(validation<br>study)                                                                                                                               | -       |
| 16Hagberg,<br>172016 [21]            | Incidence rates of<br>suicidal behaviors and<br>treated depression in<br>patients with and without<br>psoriatic arthritis using<br>the Clinical Practice<br>Research Datalink             | Cohort study     | CPRD         | 1998-2012                   | Suicidal behaviours, defined as:<br>“diagnosis of suicidal ideation,<br>suicide attempt, and/or suicide<br>recorded after the cohort entry date.<br>(...) If a patient had a code for<br>suicide, but had not died, the event<br>was classified as a suicide attempt.<br>Suicidal ideation, attempts, and<br>suicide were considered separately;<br>thus a patient may have been<br>included in more than one analysis.                                                                        | No                              | Yes,<br>record<br>review                                       | At least one year<br>of registration with<br>the practice prior<br>to the index date        | Patients with<br>suicidal<br>behaviors were<br>included<br>“because<br>patients could<br>recover from<br>suicidal<br>behaviors with<br>treatment or<br>consultation.” | -       |
| 25Hayes, 2016<br>26[101]             | Self-harm, Unintentional<br>Injury, and Suicide in<br>Bipolar Disorder During<br>Maintenance Mood<br>Stabilizer Treatment: A<br>UK Population-Based<br>Electronic Health<br>Records Study | Cohort study     | THIN         | 1995-2013                   | “emergency department or primary<br>care attendance for self-harm during<br>the period of drug exposure and the<br>3 months afterward. This outcome<br>included Read codes for intentional<br>poisoning, intentional self injurious<br>behavior, and self-harm acts of<br>uncertain intent. (...) Secondary<br>outcomes were unintentional injury<br>(eg, falls or motor vehicle crashes)<br>seen in primary or secondary care<br>and a record of the patient’s suicide<br>during this period” | No                              | Refers to<br>previous<br>validation<br>of the list<br>of codes | None stated                                                                                 | Not applicable<br>(the outcome<br>was diagnoses<br>during the<br>exposure period)                                                                                     | -       |

36  
37  
38  
39  
40  
41  
42  
43  
44  
45  
46



1

2

| 3 Author,<br>4 year of<br>5 publication | 6 Study title                                                                         | 7 Type of study | 8 Database(s) | 9 Study<br>period<br>(years) | 10 Outcome description                                                                                                                                 | 11 List of<br>codes<br>available | 12 Validation<br>of list of<br>codes | 13 EHR-related<br>eligibility<br>criteria<br>for the study<br>//<br>14 Follow up<br>requirements                                                                                                                                                                | 15 Handling of<br>outcomes<br>occurring prior<br>to exposure<br>(applicable to<br>self-harm only) | 16 Notes |
|-----------------------------------------|---------------------------------------------------------------------------------------|-----------------|---------------|------------------------------|--------------------------------------------------------------------------------------------------------------------------------------------------------|----------------------------------|--------------------------------------|-----------------------------------------------------------------------------------------------------------------------------------------------------------------------------------------------------------------------------------------------------------------|---------------------------------------------------------------------------------------------------|----------|
| 8 Hesdorffer,<br>9 2012 [4]             | Epilepsy, suicidality, and<br>psychiatric disorders: a<br>bidirectional association   | Cohort study    | CPRD          | 1990-2008                    | Read codes for suicidality including<br>codes for attempted suicide and<br>completed suicide.                                                          | No                               | None<br>stated                       | At least 3 years of<br>data before the<br>index date, and at<br>least 1 code for a<br>medical or drug<br>code in the 6<br>months before the<br>index<br>//<br>At least 1 day of<br>data after index<br>date; follow up<br>duration: 3 years<br>after index date | Excluded<br>subjects with a<br>record of the<br>outcome before<br>the study date.                 | -        |
| 10 Hesdorffer,<br>11 2016 [102]         | Occurrence and<br>Recurrence of<br>Attempted Suicide<br>Among People With<br>Epilepsy | Cohort study    | CPRD          | 1988-2013                    | Diagnoses of attempted suicide<br>identified with Read codes, not<br>further specified.<br><br>Suicide attempts divided into<br>incident or recurrent. | No                               | None<br>stated                       | At least 6 month of<br>complete records<br>before the index<br>date and ≥1<br>medical or drug<br>codes for a<br>condition other<br>than epilepsy in<br>the 6 months<br>before the index<br>date.<br>//<br>At least 1 day of<br>data post index<br>date          | None stated                                                                                       | -        |

31

32

33

34

35

36

37

38

39

40

41

42

43

44

45

46

1  
2

| 3Author,<br>4year of<br>5publication | 6Title                                                                                                                  | 7Study title                     | 8Type of study | 9Database(s) | 10Study period<br>(years)                                                                                                                                                                                                                                                                                                                                                                                                                                                                                                                                                                                                                                                                                                                                                                                                                                                                                                                                                                                                                                                                                                                                                                                                                                                                                                                                                                                                                                                                                                                                                                                                                                                                                                                                                                                                                                                                                                                                                                                                                                                                                                                                                                                                                                                                                                                                                                                                                                                                                                                                                                                                                                                                                                                                                                                                                                                                                                                                                                                                                                                                                                                                                                                                                                                                                                                                                                                                                                                                                                                                                                                                                                                                                                                                                                                                                                                                                                                                                                                                                                                                                                                                                                                                                                                                                                                                                                                                                                                                                                                                                                                                                                                                                                                                                                                                                                                                                                                                                                                                                                                                                                                                                                                                                                                                                                                                                                                                                                                                                                                                                                                                                                                                                                                                                                                                                                                                                                                                                                                                                                                                                                                                                                                                                                                                                                                                                                                                                                                                                                                                                                                                                                                                                                                                                                                                                                                                                                                                                                                                                                                                 | 11Outcome description | 12List of<br>13codes<br>14available                                              | 15Validation<br>16of list of<br>17codes                                                                             | 18EHR-related<br>19eligibility criteria<br>20for the study<br>21//<br>22Follow up<br>23requirements | 24Handling of<br>25outcomes<br>26occurring prior<br>27to exposure<br>28(applicable to<br>29self-harm only) | 30Notes |
|--------------------------------------|-------------------------------------------------------------------------------------------------------------------------|----------------------------------|----------------|--------------|-------------------------------------------------------------------------------------------------------------------------------------------------------------------------------------------------------------------------------------------------------------------------------------------------------------------------------------------------------------------------------------------------------------------------------------------------------------------------------------------------------------------------------------------------------------------------------------------------------------------------------------------------------------------------------------------------------------------------------------------------------------------------------------------------------------------------------------------------------------------------------------------------------------------------------------------------------------------------------------------------------------------------------------------------------------------------------------------------------------------------------------------------------------------------------------------------------------------------------------------------------------------------------------------------------------------------------------------------------------------------------------------------------------------------------------------------------------------------------------------------------------------------------------------------------------------------------------------------------------------------------------------------------------------------------------------------------------------------------------------------------------------------------------------------------------------------------------------------------------------------------------------------------------------------------------------------------------------------------------------------------------------------------------------------------------------------------------------------------------------------------------------------------------------------------------------------------------------------------------------------------------------------------------------------------------------------------------------------------------------------------------------------------------------------------------------------------------------------------------------------------------------------------------------------------------------------------------------------------------------------------------------------------------------------------------------------------------------------------------------------------------------------------------------------------------------------------------------------------------------------------------------------------------------------------------------------------------------------------------------------------------------------------------------------------------------------------------------------------------------------------------------------------------------------------------------------------------------------------------------------------------------------------------------------------------------------------------------------------------------------------------------------------------------------------------------------------------------------------------------------------------------------------------------------------------------------------------------------------------------------------------------------------------------------------------------------------------------------------------------------------------------------------------------------------------------------------------------------------------------------------------------------------------------------------------------------------------------------------------------------------------------------------------------------------------------------------------------------------------------------------------------------------------------------------------------------------------------------------------------------------------------------------------------------------------------------------------------------------------------------------------------------------------------------------------------------------------------------------------------------------------------------------------------------------------------------------------------------------------------------------------------------------------------------------------------------------------------------------------------------------------------------------------------------------------------------------------------------------------------------------------------------------------------------------------------------------------------------------------------------------------------------------------------------------------------------------------------------------------------------------------------------------------------------------------------------------------------------------------------------------------------------------------------------------------------------------------------------------------------------------------------------------------------------------------------------------------------------------------------------------------------------------------------------------------------------------------------------------------------------------------------------------------------------------------------------------------------------------------------------------------------------------------------------------------------------------------------------------------------------------------------------------------------------------------------------------------------------------------------------------------------------------------------------------------------------------------------------------------------------------------------------------------------------------------------------------------------------------------------------------------------------------------------------------------------------------------------------------------------------------------------------------------------------------------------------------------------------------------------------------------------------------------------------------------------------------------------------------------------------------------------------------------------------------------------------------------------------------------------------------------------------------------------------------------------------------------------------------------------------------------------------------------------------------------------------------------------------------------------------------------------------------------------------------------------------------------------|-----------------------|----------------------------------------------------------------------------------|---------------------------------------------------------------------------------------------------------------------|-----------------------------------------------------------------------------------------------------|------------------------------------------------------------------------------------------------------------|---------|
| 8Haste, 1998<br>9[103]               | 10Potential for suicide<br>11prevention in primary<br>12care? An analysis of<br>13factors associated with<br>14suicide. | 15Matched cohort<br>16study      | 17CPRD         | 181991-1993  | 19Suicide: "were identified from the<br>20database in two ways: 1. Patients<br>21with a record of suicide in the notes;<br>22and 2. Patients who did not have a<br>23record of suicide, but whose record<br>24of cause of death on the database<br>25suggested that suicide might be<br>26possible. These causes included<br>27death from carbon monoxide<br>28poisoning (excluding accidental<br>29poisoning), hanging, suicidal or<br>30accidental overdose, and reference<br>31to self-inflicted injury. (...) Cases<br>32where the verdict was open were<br>33included."                                                                                                                                                                                                                                                                                                                                                                                                                                                                                                                                                                                                                                                                                                                                                                                                                                                                                                                                                                                                                                                                                                                                                                                                                                                                                                                                                                                                                                                                                                                                                                                                                                                                                                                                                                                                                                                                                                                                                                                                                                                                                                                                                                                                                                                                                                                                                                                                                                                                                                                                                                                                                                                                                                                                                                                                                                                                                                                                                                                                                                                                                                                                                                                                                                                                                                                                                                                                                                                                                                                                                                                                                                                                                                                                                                                                                                                                                                                                                                                                                                                                                                                                                                                                                                                                                                                                                                                                                                                                                                                                                                                                                                                                                                                                                                                                                                                                                                                                                                                                                                                                                                                                                                                                                                                                                                                                                                                                                                                                                                                                                                                                                                                                                                                                                                                                                                                                                                                                                                                                                                                                                                                                                                                                                                                                                                                                                                                                                                                                                                              | 34No                  | 35Yes<br><br>36GP<br>37confirmation,<br>38review<br>39of death<br>40certificates | 41None stated                                                                                                       | 42Not applicable<br>43(cases of<br>44completed<br>45suicide only)                                   | 46-                                                                                                        |         |
| 19Jick, 1995<br>20[104]              | 21Antidepressants and<br>22suicide                                                                                      | 23Cohort study                   | 24CPRD         | 251988-1993  | 26"Cases of suicide were identified<br>27from the computer record from<br>28among all the study subjects who<br>29died. When the cause of death was<br>30recorded as suicide or was<br>31considered to be uncertain, we<br>32obtained further information from the<br>33general practitioner and the death<br>34certificate to determine the final<br>35diagnosis and means of committing<br>36suicide."                                                                                                                                                                                                                                                                                                                                                                                                                                                                                                                                                                                                                                                                                                                                                                                                                                                                                                                                                                                                                                                                                                                                                                                                                                                                                                                                                                                                                                                                                                                                                                                                                                                                                                                                                                                                                                                                                                                                                                                                                                                                                                                                                                                                                                                                                                                                                                                                                                                                                                                                                                                                                                                                                                                                                                                                                                                                                                                                                                                                                                                                                                                                                                                                                                                                                                                                                                                                                                                                                                                                                                                                                                                                                                                                                                                                                                                                                                                                                                                                                                                                                                                                                                                                                                                                                                                                                                                                                                                                                                                                                                                                                                                                                                                                                                                                                                                                                                                                                                                                                                                                                                                                                                                                                                                                                                                                                                                                                                                                                                                                                                                                                                                                                                                                                                                                                                                                                                                                                                                                                                                                                                                                                                                                                                                                                                                                                                                                                                                                                                                                                                                                                                                                                  | 37No                  | 38Yes, GP<br>39questionnaire                                                     | 40At least 6 month of<br>41registration with<br>42the practice prior<br>43to the index date                         | 44Not applicable<br>45(cases of<br>46completed<br>suicide only)                                     | -                                                                                                          |         |
| 27Jick, 1998<br>28[105]              | 29A study of the relation of<br>30exposure to quinolones<br>31and suicidal behaviour                                    | 32Nested case<br>33control study | 34CPRD         | 351991-1995  | 36Three case groups:<br>371) committed suicide;<br>382) had a diagnosis of attempted<br>39suicide;<br>403) had a diagnosis of suicidal<br>41ideation.<br><br>42<br>43<br>44<br>45<br>46<br>47<br>48<br>49<br>50<br>51<br>52<br>53<br>54<br>55<br>56<br>57<br>58<br>59<br>60<br>61<br>62<br>63<br>64<br>65<br>66<br>67<br>68<br>69<br>70<br>71<br>72<br>73<br>74<br>75<br>76<br>77<br>78<br>79<br>80<br>81<br>82<br>83<br>84<br>85<br>86<br>87<br>88<br>89<br>90<br>91<br>92<br>93<br>94<br>95<br>96<br>97<br>98<br>99<br>100<br>101<br>102<br>103<br>104<br>105<br>106<br>107<br>108<br>109<br>110<br>111<br>112<br>113<br>114<br>115<br>116<br>117<br>118<br>119<br>120<br>121<br>122<br>123<br>124<br>125<br>126<br>127<br>128<br>129<br>130<br>131<br>132<br>133<br>134<br>135<br>136<br>137<br>138<br>139<br>140<br>141<br>142<br>143<br>144<br>145<br>146<br>147<br>148<br>149<br>150<br>151<br>152<br>153<br>154<br>155<br>156<br>157<br>158<br>159<br>160<br>161<br>162<br>163<br>164<br>165<br>166<br>167<br>168<br>169<br>170<br>171<br>172<br>173<br>174<br>175<br>176<br>177<br>178<br>179<br>180<br>181<br>182<br>183<br>184<br>185<br>186<br>187<br>188<br>189<br>190<br>191<br>192<br>193<br>194<br>195<br>196<br>197<br>198<br>199<br>200<br>201<br>202<br>203<br>204<br>205<br>206<br>207<br>208<br>209<br>210<br>211<br>212<br>213<br>214<br>215<br>216<br>217<br>218<br>219<br>220<br>221<br>222<br>223<br>224<br>225<br>226<br>227<br>228<br>229<br>230<br>231<br>232<br>233<br>234<br>235<br>236<br>237<br>238<br>239<br>240<br>241<br>242<br>243<br>244<br>245<br>246<br>247<br>248<br>249<br>250<br>251<br>252<br>253<br>254<br>255<br>256<br>257<br>258<br>259<br>260<br>261<br>262<br>263<br>264<br>265<br>266<br>267<br>268<br>269<br>270<br>271<br>272<br>273<br>274<br>275<br>276<br>277<br>278<br>279<br>280<br>281<br>282<br>283<br>284<br>285<br>286<br>287<br>288<br>289<br>290<br>291<br>292<br>293<br>294<br>295<br>296<br>297<br>298<br>299<br>300<br>301<br>302<br>303<br>304<br>305<br>306<br>307<br>308<br>309<br>310<br>311<br>312<br>313<br>314<br>315<br>316<br>317<br>318<br>319<br>320<br>321<br>322<br>323<br>324<br>325<br>326<br>327<br>328<br>329<br>330<br>331<br>332<br>333<br>334<br>335<br>336<br>337<br>338<br>339<br>340<br>341<br>342<br>343<br>344<br>345<br>346<br>347<br>348<br>349<br>350<br>351<br>352<br>353<br>354<br>355<br>356<br>357<br>358<br>359<br>360<br>361<br>362<br>363<br>364<br>365<br>366<br>367<br>368<br>369<br>370<br>371<br>372<br>373<br>374<br>375<br>376<br>377<br>378<br>379<br>380<br>381<br>382<br>383<br>384<br>385<br>386<br>387<br>388<br>389<br>390<br>391<br>392<br>393<br>394<br>395<br>396<br>397<br>398<br>399<br>400<br>401<br>402<br>403<br>404<br>405<br>406<br>407<br>408<br>409<br>410<br>411<br>412<br>413<br>414<br>415<br>416<br>417<br>418<br>419<br>420<br>421<br>422<br>423<br>424<br>425<br>426<br>427<br>428<br>429<br>430<br>431<br>432<br>433<br>434<br>435<br>436<br>437<br>438<br>439<br>440<br>441<br>442<br>443<br>444<br>445<br>446<br>447<br>448<br>449<br>450<br>451<br>452<br>453<br>454<br>455<br>456<br>457<br>458<br>459<br>460<br>461<br>462<br>463<br>464<br>465<br>466<br>467<br>468<br>469<br>470<br>471<br>472<br>473<br>474<br>475<br>476<br>477<br>478<br>479<br>480<br>481<br>482<br>483<br>484<br>485<br>486<br>487<br>488<br>489<br>490<br>491<br>492<br>493<br>494<br>495<br>496<br>497<br>498<br>499<br>500<br>501<br>502<br>503<br>504<br>505<br>506<br>507<br>508<br>509<br>510<br>511<br>512<br>513<br>514<br>515<br>516<br>517<br>518<br>519<br>520<br>521<br>522<br>523<br>524<br>525<br>526<br>527<br>528<br>529<br>530<br>531<br>532<br>533<br>534<br>535<br>536<br>537<br>538<br>539<br>540<br>541<br>542<br>543<br>544<br>545<br>546<br>547<br>548<br>549<br>550<br>551<br>552<br>553<br>554<br>555<br>556<br>557<br>558<br>559<br>560<br>561<br>562<br>563<br>564<br>565<br>566<br>567<br>568<br>569<br>570<br>571<br>572<br>573<br>574<br>575<br>576<br>577<br>578<br>579<br>580<br>581<br>582<br>583<br>584<br>585<br>586<br>587<br>588<br>589<br>590<br>591<br>592<br>593<br>594<br>595<br>596<br>597<br>598<br>599<br>600<br>601<br>602<br>603<br>604<br>605<br>606<br>607<br>608<br>609<br>610<br>611<br>612<br>613<br>614<br>615<br>616<br>617<br>618<br>619<br>620<br>621<br>622<br>623<br>624<br>625<br>626<br>627<br>628<br>629<br>630<br>631<br>632<br>633<br>634<br>635<br>636<br>637<br>638<br>639<br>640<br>641<br>642<br>643<br>644<br>645<br>646<br>647<br>648<br>649<br>650<br>651<br>652<br>653<br>654<br>655<br>656<br>657<br>658<br>659<br>660<br>661<br>662<br>663<br>664<br>665<br>666<br>667<br>668<br>669<br>670<br>671<br>672<br>673<br>674<br>675<br>676<br>677<br>678<br>679<br>680<br>681<br>682<br>683<br>684<br>685<br>686<br>687<br>688<br>689<br>690<br>691<br>692<br>693<br>694<br>695<br>696<br>697<br>698<br>699<br>700<br>701<br>702<br>703<br>704<br>705<br>706<br>707<br>708<br>709<br>710<br>711<br>712<br>713<br>714<br>715<br>716<br>717<br>718<br>719<br>720<br>721<br>722<br>723<br>724<br>725<br>726<br>727<br>728<br>729<br>730<br>731<br>732<br>733<br>734<br>735<br>736<br>737<br>738<br>739<br>740<br>741<br>742<br>743<br>744<br>745<br>746<br>747<br>748<br>749<br>750<br>751<br>752<br>753<br>754<br>755<br>756<br>757<br>758<br>759<br>760<br>761<br>762<br>763<br>764<br>765<br>766<br>767<br>768<br>769<br>770<br>771<br>772<br>773<br>774<br>775<br>776<br>777<br>778<br>779<br>780<br>781<br>782<br>783<br>784<br>785<br>786<br>787<br>788<br>789<br>790<br>791<br>792<br>793<br>794<br>795<br>796<br>797<br>798<br>799<br>800<br>801<br>802<br>803<br>804<br>805<br>806<br>807<br>808<br>809<br>810<br>811<br>812<br>813<br>814<br>815<br>816<br>817<br>818<br>819<br>820<br>821<br>822<br>823<br>824<br>825<br>826<br>827<br>828<br>829<br>830<br>831<br>832<br>833<br>834<br>835<br>836<br>837<br>838<br>839<br>840<br>841<br>842<br>843<br>844<br>845<br>846<br>847<br>848<br>849<br>850<br>851<br>852<br>853<br>854<br>855<br>856<br>857<br>858<br>859<br>860<br>861<br>862<br>863<br>864<br>865<br>866<br>867<br>868<br>869<br>870<br>871<br>872<br>873<br>874<br>875<br>876<br>877<br>878<br>879<br>880<br>881<br>882<br>883<br>884<br>885<br>886<br>887<br>888<br>889<br>890<br>891<br>892<br>893<br>894<br>895<br>896<br>897<br>898<br>899<br>900<br>901<br>902<br>903<br>904<br>905<br>906<br>907<br>908<br>909<br>910<br>911<br>912<br>913<br>914<br>915<br>916<br>917<br>918<br>919<br>920<br>921<br>922<br>923<br>924<br>925<br>926<br>927<br>928<br>929<br>930<br>931<br>932<br>933<br>934<br>935<br>936<br>937<br>938<br>939<br>940<br>941<br>942<br>943<br>944<br>945<br>946<br>947<br>948<br>949<br>950<br>951<br>952<br>953<br>954<br>955<br>956<br>957<br>958<br>959<br>960<br>961<br>962<br>963<br>964<br>965<br>966<br>967<br>968<br>969<br>970<br>971<br>972<br>973<br>974<br>975<br>976<br>977<br>978<br>979<br>980<br>981<br>982<br>983<br>984<br>985<br>986<br>987<br>988<br>989<br>990<br>991<br>992<br>993<br>994<br>995<br>996<br>997<br>998<br>999<br>1000 | 37Yes                 | 38None<br>39stated                                                               | 40>18 months of<br>41information on<br>42drugs prescribed<br>43and diagnoses<br>44recorded prior to<br>45the index. | 46None stated                                                                                       | 47-                                                                                                        |         |

1

2

| 3 Author,<br>4 year of<br>5 publication | 6 Title                                                                                                         | 7 Study title           | 8 Type of study | 9 Database(s) | 10 Study period (years)                                                                                                                                                                                                           | 11 Outcome description | 12 List of codes available | 13 Validation of list of codes                                                                                          | 14 EHR-related eligibility criteria for the study // Follow up requirements                                                                      | 15 Handling of outcomes occurring prior to exposure (applicable to self-harm only) | 16 Notes |
|-----------------------------------------|-----------------------------------------------------------------------------------------------------------------|-------------------------|-----------------|---------------|-----------------------------------------------------------------------------------------------------------------------------------------------------------------------------------------------------------------------------------|------------------------|----------------------------|-------------------------------------------------------------------------------------------------------------------------|--------------------------------------------------------------------------------------------------------------------------------------------------|------------------------------------------------------------------------------------|----------|
| 8 Jick, 2000<br>9 [106]                 | 10 Isotretinoin use and risk of depression, psychotic symptoms, suicide, and attempted suicide                  | 11 Cohort study         | 12 CPRD         | 13 ?          | 14 Suicide and inpatient or outpatient code for attempted suicide                                                                                                                                                                 | 15 Yes                 | 16 None stated             | 17 Between 5 years and 6 months of clinical records before the index date // At least 1 year of records post index date | 18 Controlled for history of attempted suicide                                                                                                   | 19 -                                                                               |          |
| 15 Jick, 2004<br>16 [107]               | 17 Antidepressants and risk of suicidal behaviours                                                              | 18 Cohort study         | 19 CPRD         | 20 1993-1999  | 21 Nonfatal suicidal behaviour: "Cases were those who (1) had a first-time recorded diagnosis of nonfatal suicidal ideation (...) or attempted suicide"<br><br>22 Suicide: patients who committed suicide, not further specified. | 23 Yes                 | 24 None stated             | 25 At least 2 years of registration with the practice prior to the index date                                           | 26 None stated                                                                                                                                   | 27 -                                                                               |          |
| 22 Jick, 2009<br>23 [108]               | 24 Rate of suicide in patients taking montelukast                                                               | 25 Cohort study         | 26 CPRD         | 27 1998-2007  | 28 'computer recorded diagnosis of suicide'                                                                                                                                                                                       | 29 No                  | 30 None stated             | 31 None stated                                                                                                          | 32 None stated                                                                                                                                   | 33 -                                                                               |          |
| 34 Kurd, 2010<br>35 [16]                | 36 The risk of depression, anxiety, and suicidality in patients with psoriasis: A population-based cohort study | 37 Matched cohort study | 38 CPRD         | 39 1987-2002  | 40 'Suicidality was defined as diagnosis of suicidal ideation, suicide attempt, or suicide', defined by diagnostic Read or OXMIS codes.                                                                                           | 41 No                  | 42 None stated             | 43 None stated                                                                                                          | 44 In sensitivity analysis, the patients with a diagnosis of the outcome measured prior to or within six months of the index date were excluded. | 45 -                                                                               |          |
| 46 Kotz, 2015<br>47 [28]                | 48 Cardiovascular and neuropsychiatric risks of varenicline: a retrospective cohort study                       | 49 Cohort study         | 50 QResearch    | 51 2007-2012  | 52 Fatal and non-fatal self-harm, not further specified                                                                                                                                                                           | 53 None stated         | 54 None stated             | 55 Registered for >12 months before data extraction // Follow up duration 6 months                                      | 56 History of neuropsychiatric events considered as confounders                                                                                  | 57 -                                                                               |          |

37

38

39

40

41

42

43

44

45

46

1  
2

| 3 Author,<br>4 year of<br>5 publication | 6 Study title                                                                                                                                                     | 7 Type of study                    | 8 Database(s)                               | 9 Study<br>period<br>(years) | 10 Outcome description                                                                                                                                                                                            | 11 List of<br>codes<br>available                        | 12 Validation<br>of list of<br>codes                                                                                      | 13 EHR-related<br>eligibility<br>criteria<br>for the study<br>//<br>14 Follow up<br>requirements                                                                                                                                                                                | 15 Handling of<br>outcomes<br>occurring prior<br>to exposure<br>(applicable to<br>self-harm only) | 16 Notes                                                                                                                                                           |
|-----------------------------------------|-------------------------------------------------------------------------------------------------------------------------------------------------------------------|------------------------------------|---------------------------------------------|------------------------------|-------------------------------------------------------------------------------------------------------------------------------------------------------------------------------------------------------------------|---------------------------------------------------------|---------------------------------------------------------------------------------------------------------------------------|---------------------------------------------------------------------------------------------------------------------------------------------------------------------------------------------------------------------------------------------------------------------------------|---------------------------------------------------------------------------------------------------|--------------------------------------------------------------------------------------------------------------------------------------------------------------------|
| 8 Kotz, 2017<br>9 [27]                  | 10 Cardiovascular and<br>11 neuropsychiatric risks of<br>12 varenicline and<br>13 bupropion in smokers<br>14 with chronic obstructive<br>15 pulmonary disease     | 16 Cohort study                    | 17 QResearch                                | 18 2001-2012                 | 19 Fatal and non-fatal self-harm, not<br>20 further specified                                                                                                                                                     | 21 None stated                                          | 22 None<br>23 stated                                                                                                      | 24 None stated<br>25 //<br>26 Follow up duration<br>27 6 months                                                                                                                                                                                                                 | 28 History of<br>29 neuropsychiatric<br>30 events<br>31 considered as<br>32 confounders           | 33 -                                                                                                                                                               |
| 34 Calmohame<br>35 2012<br>36 [109]     | 37 Causes of death in<br>38 patients with multiple<br>39 sclerosis and matched<br>40 referent subjects: A<br>41 population-based cohort<br>42 study               | 43 Cohort study                    | 44 CPRD<br>45 HES<br>46 ONS<br>47 mortality | 48 2001-2008                 | 49 Death by accident or suicide<br>50 ascertained in the ONS mortality<br>51 database                                                                                                                             | 52 Yes<br>53 (ICD-10<br>54 codes)                       | 55 Not<br>56 applicable<br>57 (ONS<br>58 mortality<br>59 database,<br>60 ICD-10<br>61 codes)                              | 62 ≥1 year of data<br>63 available before<br>64 index date                                                                                                                                                                                                                      | 65 None stated                                                                                    | 66 -                                                                                                                                                               |
| 67 Martinez,<br>68 2005 [110]           | 69 Antidepressant<br>70 treatment and the risk of<br>71 fatal and non-fatal self<br>72 harm in first episode of<br>73 depression: nested<br>74 case-control study | 75 Nested case<br>76 control study | 77 CPRD                                     | 78 1995-2001                 | 79 Non-fatal self-harm (drug overdose,<br>80 deliberate self-laceration, poisoning,<br>81 and non-fatal suicide attempts using<br>82 other methods)<br>83<br>84 Suicide, identified by OXMIS and<br>85 Read codes | 86 No<br>87<br>88 Obtained<br>89 from the<br>90 authors | 91 Yes,<br>92<br>93 Review of<br>94 the death<br>95 certificates<br>96 and free<br>97 text entries                        | 98 ≥1 year of data<br>99 available before<br>100 index date                                                                                                                                                                                                                     | 101 Model adjusted<br>102 for history of<br>103 non-fatal self-<br>104 harm                       | 105 "People with an<br>106 episode of non-<br>107 fatal self harm<br>108 were not<br>109 censored in<br>110 analyses with<br>111 suicide as the<br>112 end point." |
| 113 Meier, 2004<br>114 [9]              | 115 The Risk of Severe<br>116 Depression, Psychosis<br>117 or Panic Attacks with<br>118 Prophylactic<br>119 Antimalarials                                         | 120 Cohort study                   | 121 CPRD                                    | 122 1990-1999                | 123 Suicide defined by OXMIS and/or<br>124 ICD-8 codes                                                                                                                                                            | 125 No                                                  | 126 Yes<br>127<br>128 'reviewed<br>129 a list of all<br>130 cases to<br>131 determine<br>132 inclusion/<br>133 exclusion' | 134 ≥1 year of data<br>135 available before<br>136 index date and<br>137 "some GPRD<br>138 activity (diagnoses<br>139 or prescriptions)<br>140 recorded after the<br>141 index date"<br>142 //<br>143 Patients were<br>144 censored 18<br>145 months after<br>146 exposure date | 147 Not applicable<br>148 (suicide as an<br>149 outcome only)                                     | 150 -                                                                                                                                                              |
| 151 Mines, 2005<br>152 [111]            | 153 Prevalence of risk<br>154 factors for suicide in<br>155 patients prescribed<br>156 venlafaxine, fluoxetine,<br>157 and citalopram                             | 158 Cohort study                   | 159 CPRD                                    | 160 1995-2002                | 161 Suicidal behaviour in the year prior<br>162 to index date                                                                                                                                                     | 163 Yes                                                 | 164 None<br>165 stated                                                                                                    | 166 ≥1 year of data<br>167 available                                                                                                                                                                                                                                            | 168 None stated                                                                                   | 169 -                                                                                                                                                              |

1  
2  
3  
4  
5  
6  
7  
8  
9  
10  
11  
12  
13  
14  
15  
16  
17  
18  
19  
20  
21  
22  
23  
24  
25  
26  
27  
28  
29  
30  
31  
32  
33  
34  
35  
36  
37  
38  
39  
40  
41  
42  
43  
44  
45  
46

| Author, year of publication | Study title                                                                                                          | Type of study        | Database(s) | Study period (years) | Outcome description                                                                                                                                                                                                                                            | List of codes available             | Validation of list of codes | EHR-related eligibility criteria for the study // Follow up requirements                                           | Handling of outcomes occurring prior to exposure (applicable to self-harm only)                                       | Notes                                                                                                                                                                           |
|-----------------------------|----------------------------------------------------------------------------------------------------------------------|----------------------|-------------|----------------------|----------------------------------------------------------------------------------------------------------------------------------------------------------------------------------------------------------------------------------------------------------------|-------------------------------------|-----------------------------|--------------------------------------------------------------------------------------------------------------------|-----------------------------------------------------------------------------------------------------------------------|---------------------------------------------------------------------------------------------------------------------------------------------------------------------------------|
| Osborn, 2008 [112]          | Suicide and severe mental illnesses. Cohort study within the UK general practice research database                   | Matched cohort study | CPRD        | 1987-2002            | Suicide, not further specified                                                                                                                                                                                                                                 | No                                  | None stated                 | None stated                                                                                                        | None stated                                                                                                           |                                                                                                                                                                                 |
| Rubino, 2007 [113]          | Risk of suicide during treatment with venlafaxine, citalopram, fluoxetine, and dothiepin: retrospective cohort study | Cohort study         | CPRD        | 1995-2005            | Completed suicide: coding for death associated with mention of suicide in free text or by code for suicide in the medical record and a statement of death in the administrative record (30 days either way);<br><br>First attempted suicide (non-fatal event). | Yes                                 | Yes<br><br>Free text search | At least one year of registration with the practice prior to the index date                                        | Suicide attempts considered as a confounder in the models                                                             | "excluded records that at the review of free text notes did not seem to represent attempted suicide - for example, unintentional overdose or self harm without suicidal intent" |
| Schneider, 2010 [37]        | COPD and the risk of depression                                                                                      | Cohort study         | CPRD        | 1995-2005            | 'incident suicide or suicidal ideation', not further specified                                                                                                                                                                                                 | No<br><br>Obtained from the authors | None stated                 | Patients with less than 3 years of active recording history prior to the date of the COPD diagnosis were excluded; | Patients with previous history of depression, suicide, suicidal ideation, etc., prior to the index date were excluded | -                                                                                                                                                                               |

1  
2  
3  
4  
5  
6  
7  
8  
9  
10  
11  
12  
13  
14  
15  
16  
17  
18  
19  
20  
21  
22  
23  
24  
25  
26  
27  
28  
29  
30  
31  
32  
33  
34  
35  
36  
37  
38  
39  
40  
41  
42  
43  
44  
45  
46

| Author, year of publication | Study title                                                                                                                                                                                                               | Type of study             | Database(s)                      | Study period (years) | Outcome description                                                                                                                                                                                                                                                                                                                                                                                                                                                                                                                                                                                                                                                                                                                                                             | List of codes available                  | Validation of list of codes | EHR-related eligibility criteria for the study // Follow up requirements    | Handling of outcomes occurring prior to exposure (applicable to self-harm only)                                             | Notes |
|-----------------------------|---------------------------------------------------------------------------------------------------------------------------------------------------------------------------------------------------------------------------|---------------------------|----------------------------------|----------------------|---------------------------------------------------------------------------------------------------------------------------------------------------------------------------------------------------------------------------------------------------------------------------------------------------------------------------------------------------------------------------------------------------------------------------------------------------------------------------------------------------------------------------------------------------------------------------------------------------------------------------------------------------------------------------------------------------------------------------------------------------------------------------------|------------------------------------------|-----------------------------|-----------------------------------------------------------------------------|-----------------------------------------------------------------------------------------------------------------------------|-------|
| Schuerch, 2016 [114]        | Impact of varying outcomes and definitions of suicidality on the associations of antiepileptic drugs and suicidality: comparisons from UK Clinical Practice Research Datalink (CPRD) and Danish national registries (DNR) | Validation study          | CPRD<br>HES<br>ONS               | 1996-2009            | <p><u>Suicidal ideation/intent:</u><br/>"Recorded medical terms from the clinical and referral module, plus reasons for transfer out of the general practices to identify patients with one of these outcomes"</p> <p><u>Suicide attempt:</u><br/>"Recorded medical terms from the clinical and referral module, plus reasons for transfer out of the GP-practice to identify patients with one of these outcomes from CPRD."</p> <p><u>Completed suicide:</u><br/>"Term of suicidal attempt or ideation occurring simultaneously with a recording of death (+/- 4 weeks), death recorded as reason for leaving the practice (registering out), and a final date of any administrative activity in the database of disenrollment within six months after suicidality code."</p> | Yes                                      | Yes (validation study)      | At least 6 months of data before the index date //                          | Patients with history of suicide attempts, self-harm or suicidal ideation/intent in the 6 months before index were excluded | -     |
| Thomas, 2013 [40]           | Smoking cessation treatment and risk of depression, suicide, and self harm in the Clinical Practice Research Datalink: prospective cohort study                                                                           | Nested case-control study | CPRD, HES and ONS mortality data | 2006-2011            | Incidence fatal and non-fatal self-harm (as measured by death from suicide in the ONS mortality database) and hospital admission for self-harm (as recorded in the HES database). Includes open verdicts.                                                                                                                                                                                                                                                                                                                                                                                                                                                                                                                                                                       | Yes for ONS database; no for Read codes. | None stated                 | At least one year of registration with the practice prior to the index date | Previous self-harm considered as a potential confounder in analysis                                                         | -     |

1  
2

| 3 Author,<br>4 year of<br>5 publication | 6 Study title                                                                                                                       | 7 Type of study                 | 8 Database(s)                                                                                             | 9 Study<br>period<br>(years) | 10 Outcome description                                                                                                                                                                                                                                                                                                                                                                                                                                                                                                                                            | 11 List of<br>codes<br>available | 12 Validation<br>of list of<br>codes               | 13 EHR-related<br>eligibility<br>criteria<br>for the study<br>//<br>14 Follow up<br>requirements                                                           | 15 Handling of<br>outcomes<br>occurring<br>prior to<br>exposure<br>(applicable<br>to self-harm<br>only) | 16 Notes                                                                                                         |
|-----------------------------------------|-------------------------------------------------------------------------------------------------------------------------------------|---------------------------------|-----------------------------------------------------------------------------------------------------------|------------------------------|-------------------------------------------------------------------------------------------------------------------------------------------------------------------------------------------------------------------------------------------------------------------------------------------------------------------------------------------------------------------------------------------------------------------------------------------------------------------------------------------------------------------------------------------------------------------|----------------------------------|----------------------------------------------------|------------------------------------------------------------------------------------------------------------------------------------------------------------|---------------------------------------------------------------------------------------------------------|------------------------------------------------------------------------------------------------------------------|
| 8 Thomas,<br>9 2013 [115]               | 10 Validation of suicide and<br>11 self-harm records in the<br>12 Clinical Practice<br>13 Research Datalink                         | 14 Validation study             | 15 CPRD, HES,<br>16 ONS<br>17 mortality<br>18 data, and<br>19 Multicentre<br>20 study of self-<br>21 harm | 22 1998-2010                 | 23 "Cases of suicide and self-harm (the<br>24 'events') were identified by<br>25 extracting all records with Read<br>26 codes for suicide, attempted suicide<br>27 and self-harm (...). Given that<br>28 suicide-related Read codes may<br>29 refer to both fatal and nonfatal<br>30 suicide attempts, completed suicides<br>31 within the CPRD were identified<br>32 using the conventional CPRD<br>33 approach of linking patient deaths to<br>34 Read codes for suicide that were<br>35 recorded within 95 days of the<br>36 CPRD derived death dates"         | 37 Yes                           | 38 Yes<br><br>(Validation<br>study)                | 39 Registered with a<br>40 practice<br>41 contributing with<br>42 up to standard<br>43 data, and having<br>44 acceptable<br>45 records for<br>46 research. | 47 Not applicable<br>(descriptive<br>study on the<br>incidence of self-<br>harm)                        | 48 -                                                                                                             |
| 18 Tyrrell, 2016<br>19 [116]            | 20 Changes in poisonings<br>21 among adolescents in<br>22 the UK between 1992<br>23 and 2012: a population<br>24 based cohort study | 25 Cohort study                 | 26 THIN                                                                                                   | 27 1992-2012                 | 28 "poisonings [categorised] as<br>29 intentional, unintentional, unknown<br>30 intent or alcohol related. Where<br>31 Read codes explicitly described the<br>32 intent using the words 'deliberate' or<br>33 'intentional' (intentional); 'accidental'<br>34 (unintentional); and 'unknown' or<br>35 'unspecified' (unknown) then they<br>36 were classified as such. The words<br>37 'suicide', 'self-inflicted', 'self-<br>38 poisoning' or 'overdose' were also<br>39 used to categorise a poisoning as<br>40 intentional, unless otherwise<br>41 specified." | 42 No                            | 43 None<br>stated                                  | 44 None stated                                                                                                                                             | 45 First poisoning<br>within the<br>observation<br>period                                               | 46 Multiple events<br>occurring in the<br>same individual<br>within a month<br>were counted as<br>one event only |
| 29 Webb, 2012<br>30 [17]                | 31 Risk of self-harm in<br>32 physically ill patients in<br>33 UK primary care                                                      | 34 Nested case<br>control study | 35 CPRD                                                                                                   | 36 2001-2008                 | 37 Suicidal ideation, defined by Read<br>38 coding descriptions that included the<br>39 terms 'suicide and self-inflicted,'<br>40 'suicide and self-harm,' 'para-<br>41 suicide' or 'attempted suicide.'<br>42 Cases that died following the code<br>43 were excluded.                                                                                                                                                                                                                                                                                            | 44 No                            | 45 None<br>stated                                  | 46 At least two years<br>of up to standard<br>CPRD data                                                                                                    | 47 None stated                                                                                          | 48 -                                                                                                             |
| 35 Webb, 2012<br>36 [18]                | 37 Suicide risk in primary<br>38 care patients with major<br>39 physical diseases: A<br>40 case-control study                       | 41 Nested case<br>control study | 42 CPRD and<br>43 ONS<br>44 mortality<br>45 data                                                          | 46 2001-2008                 | 47 Suicides as mentioned in the death<br>48 certificate, and open verdicts.                                                                                                                                                                                                                                                                                                                                                                                                                                                                                       | 49 Yes                           | 50 Not<br>applicable<br>(ONS<br>mortality<br>data) | 51 At least two years<br>of up to standard<br>CPRD data                                                                                                    | 52 Not applicable<br>(study of suicide<br>only)                                                         | 53 -                                                                                                             |

39  
40  
41  
42  
43  
44  
45  
46

1  
2

| 3 Author,<br>4 year of<br>5 publication | 6 Study title                                                                                                                                                                                                     | 7 Type of study                     | 8 Database(s)                                    | 9 Study<br>period<br>(years) | 10 Outcome description                                                                                                                                                                                                                                                                                                      | 11 List of<br>codes<br>available                                                                  | 12 Validation<br>of list of<br>codes                                                                                  | 13 EHR-related<br>eligibility criteria<br>for the study<br>//<br>14 Follow up<br>requirements             | 15 Handling of<br>outcomes<br>occurring prior<br>to exposure<br>(applicable to<br>self-harm only) | 16 Notes |
|-----------------------------------------|-------------------------------------------------------------------------------------------------------------------------------------------------------------------------------------------------------------------|-------------------------------------|--------------------------------------------------|------------------------------|-----------------------------------------------------------------------------------------------------------------------------------------------------------------------------------------------------------------------------------------------------------------------------------------------------------------------------|---------------------------------------------------------------------------------------------------|-----------------------------------------------------------------------------------------------------------------------|-----------------------------------------------------------------------------------------------------------|---------------------------------------------------------------------------------------------------|----------|
| 8 Wijaars,<br>9 2013 [119]              | 10 Suicide-related events in<br>11 young people following<br>12 prescription of SSRIs<br>13 and other<br>14 antidepressants: A self-<br>15 controlled case series<br>16 analysis                                  | 17 Nested case<br>18 control study  | 19 THIN                                          | 20 1995-2009                 | 21 Suicide attempts, suicidal ideation<br>22 and completed suicide.<br><br>23 Completed suicides: "Read codes<br>24 that were confirmed by a date of<br>25 death within 2 weeks of the suicide<br>26 event date. We searched a cause of<br>27 death, if available."<br>28 Excluded cases classified as open<br>29 verdicts. | 30 No<br><br>31 Refers to a<br>32 previous list,<br>33 that was<br>34 updated for<br>35 the study | 36 Yes<br><br>37 Record<br>38 review                                                                                  | 39 At least 6 months<br>40 of up to standard<br>41 CPRD data                                              | 42 Accounted for in<br>43 analysis                                                                | 44 -     |
| 16 Windfuhr,<br>17 2016 [120]           | 18 Suicide risk linked with<br>19 clinical consultation<br>20 frequency, psychiatric<br>21 diagnoses and<br>22 psychotropic medication<br>23 prescribing in a national<br>24 study of primary-care<br>25 patients | 26 Nested case-<br>27 control study | 28 CPRD and<br>29 ONS<br>30 mortality<br>31 data | 32 2002-2011                 | 33 International Classification<br>34 of Disease version 10 (ICD-10)<br>35 codes X60-84, Y10-34<br>36 (excluding Y33.9), Y87.0, Y87.2<br><br>37 Includes open verdicts                                                                                                                                                      | 38 Yes                                                                                            | 39 Not<br>40 applicable<br>41 (ONS<br>42 mortality<br>43 data)                                                        | 44 ≥1 year of data<br>45 available after up<br>46 to standard data                                        | None stated                                                                                       | -        |
| 22 Yang, 2003<br>23 [94]                | 24 Lipid-lowering drugs and<br>25 the risk of depression<br>26 and suicidal behaviour                                                                                                                             | 27 Matched cohort<br>28 study       | 29 CPRD                                          | 30 1991<br>31 onwards        | 32 Suicidal behaviour, ideation suicidal,<br>33 suicidal plan, suicidal thoughts,<br>34 attempted suicide, threat suicide,<br>35 suicidal drug overdose, drug<br>36 overdose, para suicide and suicide.                                                                                                                     | 37 Yes                                                                                            | 38 No<br><br>39 (refers to<br>40 previous<br>41 studies<br>42 assessing<br>43 suitability<br>44 of the<br>45 records) | 46 Patients with<br>47 history of suicidal<br>48 behaviour prior to<br>49 study start were<br>50 excluded | None stated                                                                                       | -        |

29 CPRD – Clinical Practice Research Datalink; THIN – The Health Improvement Network; PCCIU – Primary Care Clinical Informatics Unit; SSRI - selective serotonin re-uptake  
30 inhibitors; GP – General practice; MAOIs - monoamine oxidase inhibitors; CiPCA - Consultations in primary care archive; PiPCA - Prescriptions in primary care archive.

43  
44  
45  
46



## References

1. Bouras G, SR Markar, EM Burns, HA Mackenzie, et al. Linked Hospital and Primary Care Database Analysis of the Incidence and Impact of Psychiatric Morbidity Following Gastrointestinal Cancer Surgery in England. *Ann Surg* 2016;264:93-9.
2. Fardet L, I Petersen, and I Nazareth. Suicidal behavior and severe neuropsychiatric disorders following glucocorticoid therapy in primary care. *Am J Psychiatry* 2012;169:491-7.
3. Granerod J, NW Davies, PP Ramanuj, A Easton, et al. Increased rates of sequelae post-encephalitis in individuals attending primary care practices in the United Kingdom: a population-based retrospective cohort study. *J Neurol* 2017;264:407-415.
4. Hesdorffer DC, L Ishihara, L Mynepalli, DJ Webb, et al. Epilepsy, suicidality, and psychiatric disorders: a bidirectional association. *Ann Neurol* 2012;72:184-91.
5. Khan NF, AM Ward, E Watson, and PW Rose. Consulting and prescribing behaviour for anxiety and depression in long-term survivors of cancer in the UK. *Eur J Cancer* 2010;46:3339-44.
6. Kurd SK, AB Troxel, P Crits-Christoph, and JM Gelfand. The risk of depression, anxiety, and suicidality in patients with psoriasis: a population-based cohort study. *Arch Dermatol* 2010;146:891-5.
7. Lurie I, YX Yang, K Haynes, R Mamtani, et al. Antibiotic exposure and the risk for depression, anxiety, or psychosis: a nested case-control study. *J Clin Psychiatry* 2015;76:1522-8.
8. Martin-Merino E, A Ruigomez, MA Wallander, S Johansson, et al. Prevalence, incidence, morbidity and treatment patterns in a cohort of patients diagnosed with anxiety in UK primary care. *Fam Pract* 2010;27:9-16.
9. Meier CR, K Wilcock, and SS Jick. The risk of severe depression, psychosis or panic attacks with prophylactic antimalarials. *Drug Saf* 2004;27:203-13.
10. Schneider C, M Adamcova, SS Jick, P Schlagenhaut, et al. Antimalarial chemoprophylaxis and the risk of neuropsychiatric disorders. *Travel Med Infect Dis* 2013;11:71-80.
11. Sheehan R, A Hassiotis, K Walters, D Osborn, et al. Mental illness, challenging behaviour, and psychotropic drug prescribing in people with intellectual disability: UK population based cohort study. *BMJ* 2015;351:h4326.
12. Walters K, G Rait, M Griffin, M Buszewicz, et al. Recent trends in the incidence of anxiety diagnoses and symptoms in primary care. *PLoS One* 2012;7:e41670.
13. Becker C, GP Brobert, S Johansson, SS Jick, et al. Risk of incident depression in patients with Parkinson disease in the UK. *Eur J Neurol* 2011;18:448-53.
14. Booth H, O Khan, AT Prevost, M Reddy, et al. Impact of bariatric surgery on clinical depression. Interrupted time series study with matched controls. *J Affect Disord* 2015;174:644-9.
15. Bornand D, S Toovey, SS Jick, and CR Meier. The risk of new onset depression in association with influenza--A population-based observational study. *Brain Behav Immun* 2016;53:131-137.
16. Claxton AJ, Z Li, and J McKendrick. Selective serotonin reuptake inhibitor treatment in the UK: risk of relapse or recurrence of depression. *Br J Psychiatry* 2000;177:163-8.

17. Clifford GM and RD Farmer. Drug or symptom-induced depression in men treated with alpha 1-blockers for benign prostatic hyperplasia? A nested case-control study. *Pharmacoepidemiol Drug Saf* 2002;11:55-61.
18. Dave S, I Petersen, L Sherr, and I Nazareth. Incidence of maternal and paternal depression in primary care: a cohort study using a primary care database. *Arch Pediatr Adolesc Med* 2010;164:1038-44.
19. Gunnell D, D Irvine, L Wise, C Davies, et al. Varenicline and suicidal behaviour: a cohort study based on data from the General Practice Research Database. *BMJ* 2009;339:b3805.
20. Hagberg KW, HA Divan, JC Nickel, and SS Jick. Risk of Incident Antidepressant-Treated Depression Associated with Use of 5alpha-Reductase Inhibitors Compared with Use of alpha-Blockers in Men with Benign Prostatic Hyperplasia: A Population-Based Study Using the Clinical Practice Research Datalink. *Pharmacotherapy* 2017;37:517-527.
21. Hagberg KW, L Li, M Peng, K Shah, et al. Incidence rates of suicidal behaviors and treated depression in patients with and without psoriatic arthritis using the Clinical Practice Research Datalink. *Mod Rheumatol* 2016;26:774-9.
22. Harris T, SM Shah, IM Carey, S DeWilde, et al. Depression indicators in a national sample of older community and care home patients: applying the Quality and Outcomes Framework. *Br J Gen Pract* 2011;61:135-8.
23. Jacob L, T Rockel, and K Kostev. Depression Risk in Patients with Rheumatoid Arthritis in the United Kingdom. *Rheumatol Ther* 2017;4:195-200.
24. Jenkins-Jones S, L Parviainen, J Porter, M Withe, et al. Poor compliance and increased mortality, depression and healthcare costs in patients with congenital adrenal hyperplasia. *Eur J Endocrinol* 2018;178:309-320.
25. John A, AL Marchant, DL Fone, JI McGregor, et al. Recent trends in primary-care antidepressant prescribing to children and young people: an e-cohort study. *Psychol Med* 2016;46:3315-3327.
26. Kendrick T, B Stuart, C Newell, AW Geraghty, et al. Changes in rates of recorded depression in English primary care 2003-2013: Time trend analyses of effects of the economic recession, and the GP contract quality outcomes framework (QOF). *J Affect Disord* 2015;180:68-78.
27. Kotz D, W Viechtbauer, CR Simpson, OCP van Schayck, et al. Cardiovascular and neuropsychiatric risks of varenicline and bupropion in smokers with chronic obstructive pulmonary disease. *Thorax* 2017;72:905-911.
28. Kotz D, W Viechtbauer, C Simpson, OC van Schayck, et al. Cardiovascular and neuropsychiatric risks of varenicline: a retrospective cohort study. *Lancet Respir Med* 2015;3:761-8.
29. Martin-Merino E, A Ruigomez, S Johansson, MA Wallander, et al. Study of a cohort of patients newly diagnosed with depression in general practice: prevalence, incidence, comorbidity, and treatment patterns. *Prim Care Companion J Clin Psychiatry* 2010;12:PCC 08m00764.
30. Millson D, M Frischer, P Croft, and PJ Goadsby. Are triptans with enhanced lipophilicity used for the acute treatment of migraine associated with an increased consulting rate for depressive illness? *Cephalalgia* 2000;20:732-7.

- 1
- 2
- 3
- 4 31. Milojevic A, B Armstrong, and P Wilkinson. Mental health impacts of flooding: a
- 5 controlled interrupted time series analysis of prescribing data in England. *J Epidemiol*
- 6 *Community Health* 2017;71:970-973.
- 7
- 8 32. Moore M, HM Yuen, N Dunn, MA Mullee, et al. Explaining the rise in antidepressant
- 9 prescribing: a descriptive study using the general practice research database. *BMJ*
- 10 2009;339:b3999.
- 11
- 12 33. Morgan E, CC Patterson, and CR Cardwell. General practice-recorded depression
- 13 and antidepressant use in young people with newly diagnosed Type 1 diabetes: a
- 14 cohort study using the Clinical Practice Research Datalink. *Diabet Med* 2014;31:241-
- 15 5.
- 16
- 17 34. Petersen I, JM Thomas, WT Hamilton, and PD White. Risk and predictors of fatigue
- 18 after infectious mononucleosis in a large primary-care cohort. *QJM* 2006;99:49-55.
- 19
- 20 35. Rait G, K Walters, M Griffin, M Buszewicz, et al. Recent trends in the incidence of
- 21 recorded depression in primary care. *Br J Psychiatry* 2009;195:520-4.
- 22
- 23 36. Shah SM, IM Carey, T Harris, S DeWilde, et al. The mental health and mortality
- 24 impact of death of a partner with dementia. *Int J Geriatr Psychiatry* 2016;31:929-37.
- 25
- 26 37. Schneider C, SS Jick, U Bothner, and CR Meier. COPD and the risk of depression.
- 27 *Chest* 2010;137:341-7.
- 28
- 29 38. Smeeth L, I Douglas, AJ Hall, R Hubbard, et al. Effect of statins on a wide range of
- 30 health outcomes: a cohort study validated by comparison with randomized trials. *Br J*
- 31 *Clin Pharmacol* 2009;67:99-109.
- 32
- 33 39. Smith DJ, H Court, G McLean, D Martin, et al. Depression and multimorbidity: a
- 34 cross-sectional study of 1,751,841 patients in primary care. *J Clin Psychiatry*
- 35 2014;75:1202-8; quiz 1208.
- 36
- 37 40. Thomas KH, RM Martin, NM Davies, C Metcalfe, et al. Smoking cessation treatment
- 38 and risk of depression, suicide, and self harm in the Clinical Practice Research
- 39 Datalink: prospective cohort study. *BMJ* 2013;347:f5704.
- 40
- 41 41. Tyrer F, RA Lawrenson, and RDT Farmer. A study of cardiovascular disease,
- 42 depression and antidepressants on a computerised general practice database.
- 43 *Human Psychopharmacology: clinical & experimental* 1999;14:233-237.
- 44
- 45 42. Vallerand IA, RT Lewinson, LM Parsons, MW Lowerison, et al. Risk of depression
- 46 among patients with acne in the U.K.: a population-based cohort study. *Br J Dermatol*
- 47 2018;178:e194-e195.
- 48
- 49 43. Walters P, P Schofield, L Howard, M Ashworth, et al. The relationship between
- 50 asthma and depression in primary care patients: a historical cohort and nested case
- 51 control study. *PLoS One* 2011;6:e20750.
- 52
- 53 44. Yang CC, SS Jick, and H Jick. Lipid-lowering drugs and the risk of depression and
- 54 suicidal behavior. *Arch Intern Med* 2003;163:1926-32.
- 55
- 56 45. John A, J McGregor, D Fone, F Dunstan, et al. Case-finding for common mental
- 57 disorders of anxiety and depression in primary care: an external validation of
- 58 routinely collected data. *BMC Med Inform Decis Mak* 2016;16:35.
- 59
- 60 46. Turner GM, M Calvert, MG Feltham, R Ryan, et al. Ongoing impairments following
- transient ischaemic attack: retrospective cohort study. *Eur J Neurol* 2016;23:1642-
- 1650.

- 1
  - 2
  - 3
  - 4
  - 5
  - 6
  - 7
  - 8
  - 9
  - 10
  - 11
  - 12
  - 13
  - 14
  - 15
  - 16
  - 17
  - 18
  - 19
  - 20
  - 21
  - 22
  - 23
  - 24
  - 25
  - 26
  - 27
  - 28
  - 29
  - 30
  - 31
  - 32
  - 33
  - 34
  - 35
  - 36
  - 37
  - 38
  - 39
  - 40
  - 41
  - 42
  - 43
  - 44
  - 45
  - 46
  - 47
  - 48
  - 49
  - 50
  - 51
  - 52
  - 53
  - 54
  - 55
  - 56
  - 57
  - 58
  - 59
  - 60
47. Brown A, O Kirichek, A Balkwill, G Reeves, et al. Comparison of dementia recorded in routinely collected hospital admission data in England with dementia recorded in primary care. *Emerg Themes Epidemiol* 2016;13:11.
48. Davies NM, PG Kehoe, Y Ben-Shlomo, and RM Martin. Associations of anti-hypertensive treatments with Alzheimer's disease, vascular dementia, and other dementias. *J Alzheimers Dis* 2011;26:699-708.
49. Donegan K, N Fox, N Black, G Livingston, et al. Trends in diagnosis and treatment for people with dementia in the UK from 2005 to 2015: a longitudinal retrospective cohort study. *Lancet Public Health* 2017;2:e149-e156.
50. Dregan A, P Chowienczyk, and MC Gulliford. Are Inflammation and Related Therapy Associated with All-Cause Dementia in a Primary Care Population? *J Alzheimers Dis* 2015;46:1039-47.
51. Dregan A, P Chowienczyk, and D Armstrong. Patterns of anti-inflammatory drug use and risk of dementia: a matched case-control study. *Eur J Neurol* 2015;22:1421-8.
52. Dunn N, C Holmes, and M Mullee. Does lithium therapy protect against the onset of dementia? *Alzheimer Dis Assoc Disord* 2005;19:20-2.
53. Dunn N, M Mullee, VH Perry, and C Holmes. Association between dementia and infectious disease: evidence from a case-control study. *Alzheimer Dis Assoc Disord* 2005;19:91-4.
54. Emdin CA, PM Rothwell, G Salimi-Khorshidi, A Kiran, et al. Blood Pressure and Risk of Vascular Dementia: Evidence From a Primary Care Registry and a Cohort Study of Transient Ischemic Attack and Stroke. *Stroke* 2016;47:1429-35.
55. Goh KL, K Bhaskaran, C Minassian, SJ Evans, et al. Angiotensin receptor blockers and risk of dementia: cohort study in UK Clinical Practice Research Datalink. *Br J Clin Pharmacol* 2015;79:337-50.
56. Hippisley-Cox J and C Coupland. Unintended effects of statins in men and women in England and Wales: population based cohort study using the QResearch database. *BMJ* 2010;340:c2197.
57. Imfeld P, M Bodmer, SS Jick, and CR Meier. Metformin, other antidiabetic drugs, and risk of Alzheimer's disease: a population-based case-control study. *J Am Geriatr Soc* 2012;60:916-21.
58. Imfeld P, YB Brauchli Pernus, SS Jick, and CR Meier. Epidemiology, co-morbidities, and medication use of patients with Alzheimer's disease or vascular dementia in the UK. *J Alzheimers Dis* 2013;35:565-73.
59. Imfeld P, M Bodmer, SS Jick, and CR Meier. Benzodiazepine Use and Risk of Developing Alzheimer's Disease or Vascular Dementia: A Case-Control Analysis. *Drug Saf* 2015;38:909-19.
60. Jick H, GL Zornberg, SS Jick, S Seshadri, et al. Statins and the risk of dementia. *Lancet* 2000;356:1627-31.
61. Judge A, C Garriga, NK Arden, S Lovestone, et al. Protective effect of antirheumatic drugs on dementia in rheumatoid arthritis patients. *Alzheimers Dement (N Y)* 2017;3:612-621.
62. Khan NF, D Mant, L Carpenter, D Forman, et al. Long-term health outcomes in a British cohort of breast, colorectal and prostate cancer survivors: a database study. *Br J Cancer* 2011;105 Suppl 1:S29-37.

- 1  
2  
3 63. Khosrow-Khavar F, S Rej, H Yin, A Aprikian, et al. Androgen Deprivation Therapy  
4 and the Risk of Dementia in Patients With Prostate Cancer. *J Clin Oncol*  
5 2017;35:201-207.  
6  
7 64. Lu N, M Dubreuil, Y Zhang, T Neogi, et al. Gout and the risk of Alzheimer's disease:  
8 a population-based, BMI-matched cohort study. *Ann Rheum Dis* 2016;75:547-51.  
9  
10 65. Mehta HB, V Mehta, and JS Goodwin. Association of Hypoglycemia With  
11 Subsequent Dementia in Older Patients With Type 2 Diabetes Mellitus. *J Gerontol A*  
12 *Biol Sci Med Sci* 2017;72:1110-1116.  
13  
14 66. Mehta HB, V Mehta, CL Tsai, H Chen, et al. Development and Validation of the  
15 RxDx-Dementia Risk Index to Predict Dementia in Patients with Type 2 Diabetes and  
16 Hypertension. *J Alzheimers Dis* 2016;49:423-32.  
17  
18 67. Perera G, L Pedersen, D Ansel, M Alexander, et al. Dementia prevalence and  
19 incidence in a federation of European Electronic Health Record databases: The  
20 European Medical Informatics Framework resource. *Alzheimers Dement*  
21 2018;14:130-139.  
22  
23 68. Qizilbash N, J Gregson, ME Johnson, N Pearce, et al. BMI and risk of dementia in  
24 two million people over two decades: a retrospective cohort study. *Lancet Diabetes*  
25 *Endocrinol* 2015;3:431-436.  
26  
27 69. Seshadri S, GL Zornberg, LE Derby, MW Myers, et al. Postmenopausal estrogen  
28 replacement therapy and the risk of Alzheimer disease. *Arch Neurol* 2001;58:435-40.  
29  
30 70. Strom BL, R Schinnar, J Karlawish, S Hennessy, et al. Statin Therapy and Risk of  
31 Acute Memory Impairment. *JAMA Intern Med* 2015;175:1399-405.  
32  
33 71. Walters K, S Haroon, I Petersen, S Iliffe, et al. Predicting dementia risk in primary  
34 care: development and validation of the Dementia Risk Score using routinely  
35 collected data. *BMC Med* 2016;14:6.  
36  
37 72. Donegan K, R Beau-Lejdstrom, B King, S Seabroke, et al. Bivalent human  
38 papillomavirus vaccine and the risk of fatigue syndromes in girls in the UK. *Vaccine*  
39 2013;31:4961-7.  
40  
41 73. Collin SM, IJ Bakken, I Nazareth, E Crawley, et al. Trends in the incidence of chronic  
42 fatigue syndrome and fibromyalgia in the UK, 2001-2013: a Clinical Practice  
43 Research Datalink study. *J R Soc Med* 2017;110:231-244.  
44  
45 74. Gallagher AM, JM Thomas, WT Hamilton, and PD White. Incidence of fatigue  
46 symptoms and diagnoses presenting in UK primary care from 1990 to 2001. *J R Soc*  
47 *Med* 2004;97:571-5.  
48  
49 75. Hamilton WT, AM Gallagher, JM Thomas, and PD White. Risk markers for both  
50 chronic fatigue and irritable bowel syndromes: a prospective case-control study in  
51 primary care. *Psychol Med* 2009;39:1913-21.  
52  
53 76. Becker C, GP Brobert, PM Almqvist, S Johansson, et al. Migraine incidence,  
54 comorbidity and health resource utilization in the UK. *Cephalalgia* 2008;28:57-64.  
55  
56 77. Campbell P, M Shraim, KP Jordan, and KM Dunn. In sickness and in health: A cross-  
57 sectional analysis of concordance for musculoskeletal pain in 13,507 couples. *Eur J*  
58 *Pain* 2016;20:438-46.  
59  
60 78. Hall GC, D Carroll, D Parry, and HJ McQuay. Epidemiology and treatment of  
neuropathic pain: the UK primary care perspective. *Pain* 2006;122:156-62.

- 1
- 2
- 3 79. Hall GC, SV Morant, D Carroll, ZL Gabriel, et al. An observational descriptive study
- 4 of the epidemiology and treatment of neuropathic pain in a UK general population.
- 5 BMC Fam Pract 2013;14:28.
- 6
- 7 80. Mansfield KE, J Sim, P Croft, and KP Jordan. Identifying patients with chronic
- 8 widespread pain in primary care. Pain 2017;158:110-119.
- 9
- 10 81. Ruigomez A, LA Rodriguez, MA Wallander, S Johansson, et al. Chest pain in general
- 11 practice: incidence, comorbidity and mortality. Fam Pract 2006;23:167-74.
- 12
- 13 82. Wallander MA, S Johansson, A Ruigomez, and LA Garcia Rodriguez. Unspecified
- 14 abdominal pain in primary care: the role of gastrointestinal morbidity. Int J Clin Pract
- 15 2007;61:1663-70.
- 16
- 17 83. Zondervan KT, PL Yudkin, MP Vessey, MG Dawes, et al. Prevalence and incidence
- 18 of chronic pelvic pain in primary care: evidence from a national general practice
- 19 database. Br J Obstet Gynaecol 1999;106:1149-55.
- 20
- 21 84. Blumentals WA, RR Brown, and A Gomez-Caminero. Antihypertensive treatment and
- 22 erectile dysfunction in a cohort of type II diabetes patients. Int J Impot Res
- 23 2003;15:314-7.
- 24
- 25 85. Hagberg KW, HA Divan, R Persson, JC Nickel, et al. Risk of erectile dysfunction
- 26 associated with use of 5-alpha reductase inhibitors for benign prostatic hyperplasia or
- 27 alopecia: population based studies using the Clinical Practice Research Datalink.
- 28 BMJ 2016;354:i4823.
- 29
- 30 86. Morant S, G Bloomfield, V Vats, and C Chapple. Increased sexual dysfunction in
- 31 men with storage and voiding lower urinary tract symptoms. J Sex Med 2009;6:1103-
- 32 1110.
- 33
- 34 87. Schlesinger N, N Lu, and HK Choi. Gout and the Risk of Incident Erectile
- 35 Dysfunction: A Body Mass Index-matched Population-based Study. J Rheumatol
- 36 2018;45:1192-1197.
- 37
- 38 88. Abdul Sultan A, C Mallen, R Hayward, S Muller, et al. Gout and subsequent erectile
- 39 dysfunction: a population-based cohort study from England. Arthritis Res Ther
- 40 2017;19:123.
- 41
- 42 89. Roddy E, S Muller, R Hayward, and CD Mallen. The association of gout with sleep
- 43 disorders: a cross-sectional study in primary care. BMC Musculoskelet Disord
- 44 2013;14:119.
- 45
- 46 90. Wallander MA, S Johansson, A Ruigomez, LA Garcia Rodriguez, et al. Morbidity
- 47 associated with sleep disorders in primary care: a longitudinal cohort study. Prim
- 48 Care Companion J Clin Psychiatry 2007;9:338-45.
- 49
- 50 91. Andersohn F, R Schade, SN Willich, and E Garbe. Use of antiepileptic drugs in
- 51 epilepsy and the risk of self-harm or suicidal behavior. Neurology 2010;75:335-40.
- 52
- 53 92. Arana A, CE Wentworth, JL Ayuso-Mateos, and FM Arellano. Suicide-related events
- 54 in patients treated with antiepileptic drugs. N Engl J Med 2010;363:542-51.
- 55
- 56 93. Carr MJ, DM Ashcroft, E Kontopantelis, Y Awenat, et al. The epidemiology of self-
- 57 harm in a UK-wide primary care patient cohort, 2001-2013. BMC Psychiatry
- 58 2016;16:53.
- 59
- 60 94. Carr MJ, DM Ashcroft, E Kontopantelis, D While, et al. Premature Death Among
- Primary Care Patients With a History of Self-Harm. Ann Fam Med 2017;15:246-254.

- 1
  - 2
  - 3
  - 4
  - 5
  - 6
  - 7
  - 8
  - 9
  - 10
  - 11
  - 12
  - 13
  - 14
  - 15
  - 16
  - 17
  - 18
  - 19
  - 20
  - 21
  - 22
  - 23
  - 24
  - 25
  - 26
  - 27
  - 28
  - 29
  - 30
  - 31
  - 32
  - 33
  - 34
  - 35
  - 36
  - 37
  - 38
  - 39
  - 40
  - 41
  - 42
  - 43
  - 44
  - 45
  - 46
  - 47
  - 48
  - 49
  - 50
  - 51
  - 52
  - 53
  - 54
  - 55
  - 56
  - 57
  - 58
  - 59
  - 60
95. Coupland C, P Dhiman, R Morriss, A Arthur, et al. Antidepressant use and risk of adverse outcomes in older people: population based cohort study. *BMJ* 2011;343:d4551.
96. Coupland C, T Hill, R Morriss, A Arthur, et al. Antidepressant use and risk of suicide and attempted suicide or self harm in people aged 20 to 64: cohort study using a primary care database. *BMJ* 2015;350:h517.
97. Donovan S. The Use of the General Practice Research Database (Gprd) to Examine Potential Links between Antidepressant Medication and the Incidence of Suicide. *Therapeutic Innovation & Regulatory Science* 1996;30:785-792.
98. Doyle M, D While, PL Mok, K Windfuhr, et al. Suicide risk in primary care patients diagnosed with a personality disorder: a nested case control study. *BMC Fam Pract* 2016;17:106.
99. Gao S, J Juhaeri, S Reshef, and WS Dai. Association between body mass index and suicide, and suicide attempt among British adults: the health improvement network database. *Obesity (Silver Spring)* 2013;21:E334-42.
100. Hall GC. Validation of death and suicide recording on the THIN UK primary care database. *Pharmacoepidemiol Drug Saf* 2009;18:120-31.
101. Hayes JF, A Pitman, L Marston, K Walters, et al. Self-harm, Unintentional Injury, and Suicide in Bipolar Disorder During Maintenance Mood Stabilizer Treatment: A UK Population-Based Electronic Health Records Study. *JAMA Psychiatry* 2016;73:630-7.
102. Hesdorffer DC, L Ishihara, DJ Webb, L Mynepalli, et al. Occurrence and Recurrence of Attempted Suicide Among People With Epilepsy. *JAMA Psychiatry* 2016;73:80-6.
103. Haste F, J Charlton, and R Jenkins. Potential for suicide prevention in primary care? An analysis of factors associated with suicide. *Br J Gen Pract* 1998;48:1759-63.
104. Jick SS, AD Dean, and H Jick. Antidepressants and suicide. *BMJ* 1995;310:215-8.
105. Jick SS, C Vasilakis, C Martinez, and H Jick. A study of the relation of exposure to quinolones and suicidal behaviour. *Br J Clin Pharmacol* 1998;45:77-81.
106. Jick SS, HM Kremers, and C Vasilakis-Scaramozza. Isotretinoin use and risk of depression, psychotic symptoms, suicide, and attempted suicide. *Arch Dermatol* 2000;136:1231-6.
107. Jick H, JA Kaye, and SS Jick. Antidepressants and the risk of suicidal behaviors. *JAMA* 2004;292:338-43.
108. Jick H, KW Hagberg, and P Egger. Rate of suicide in patients taking montelukast. *Pharmacotherapy* 2009;29:165-6.
109. Lalmohamed A, MT Bazelier, TP Van Staa, BM Uitdehaag, et al. Causes of death in patients with multiple sclerosis and matched referent subjects: a population-based cohort study. *Eur J Neurol* 2012;19:1007-14.
110. Martinez C, S Rietbrock, L Wise, D Ashby, et al. Antidepressant treatment and the risk of fatal and non-fatal self harm in first episode depression: nested case-control study. *BMJ* 2005;330:389.
111. Mines D, D Hill, H Yu, and L Novelli. Prevalence of risk factors for suicide in patients prescribed venlafaxine, fluoxetine, and citalopram. *Pharmacoepidemiol Drug Saf* 2005;14:367-72.

- 1  
2  
3 112. Osborn D, G Levy, I Nazareth, and M King. Suicide and severe mental illnesses. Cohort study within the UK general practice research database. *Schizophr Res* 2008;99:134-8.
- 4  
5  
6  
7 113. Rubino A, N Roskell, P Tennis, D Mines, et al. Risk of suicide during treatment with venlafaxine, citalopram, fluoxetine, and dothiepin: retrospective cohort study. *BMJ* 2007;334:242.
- 8  
9  
10  
11 114. Schuerch M, C Gasse, NJ Robinson, Y Alvarez, et al. Impact of varying outcomes and definitions of suicidality on the associations of antiepileptic drugs and suicidality: comparisons from UK Clinical Practice Research Datalink (CPRD) and Danish national registries (DNR). *Pharmacoepidemiol Drug Saf* 2016;25 Suppl 1:142-55.
- 12  
13  
14  
15 115. Thomas KH, N Davies, C Metcalfe, F Windmeijer, et al. Validation of suicide and self-harm records in the Clinical Practice Research Datalink. *Br J Clin Pharmacol* 2013;76:145-57.
- 16  
17  
18  
19 116. Tyrrell EG, E Orton, and LJ Tata. Changes in poisonings among adolescents in the UK between 1992 and 2012: a population based cohort study. *Inj Prev* 2016;22:400-406.
- 20  
21  
22  
23 117. Webb RT, E Kontopantelis, T Doran, P Qin, et al. Risk of self-harm in physically ill patients in UK primary care. *J Psychosom Res* 2012;73:92-7.
- 24  
25  
26 118. Webb RT, E Kontopantelis, T Doran, P Qin, et al. Suicide risk in primary care patients with major physical diseases: a case-control study. *Arch Gen Psychiatry* 2012;69:256-64.
- 27  
28  
29  
30 119. Wijlaars LP, I Nazareth, HJ Whitaker, SJ Evans, et al. Suicide-related events in young people following prescription of SSRIs and other antidepressants: a self-controlled case series analysis. *BMJ Open* 2013;3:e003247.
- 31  
32  
33  
34 120. Windfuhr K, D While, N Kapur, DM Ashcroft, et al. Suicide risk linked with clinical consultation frequency, psychiatric diagnoses and psychotropic medication prescribing in a national study of primary-care patients. *Psychol Med* 2016;46:3407-3417.
- 35  
36  
37  
38  
39  
40  
41  
42  
43  
44  
45  
46  
47  
48  
49  
50  
51  
52  
53  
54  
55  
56  
57  
58  
59  
60



**Table 1. List of Read codes used in the studies of anxiety.**

| Read code | Description                                                  | Number of studies |
|-----------|--------------------------------------------------------------|-------------------|
| Eu41.00   | [X]Other anxiety disorders                                   | 5                 |
| Eu41100   | [X]Generalized anxiety disorder                              | 5                 |
| Eu41z11   | [X]Anxiety NOS                                               | 5                 |
| Eu41000   | [X]Panic disorder [episodic paroxysmal anxiety]              | 4                 |
| Eu05400   | [X]Organic anxiety disorder                                  | 4                 |
| Eu41112   | [X]Anxiety reaction                                          | 4                 |
| Eu41111   | [X]Anxiety neurosis                                          | 4                 |
| Eu41z00   | [X]Anxiety disorder, unspecified                             | 4                 |
| E202.12   | Phobic anxiety                                               | 4                 |
| E200200   | Generalised anxiety disorder                                 | 4                 |
| E200.00   | Anxiety states                                               | 4                 |
| E200000   | Anxiety state unspecified                                    | 4                 |
| E200z00   | Anxiety state NOS                                            | 4                 |
| Eu40.00   | [X]Phobic anxiety disorders                                  | 3                 |
| Eu40z00   | [X]Phobic anxiety disorder, unspecified                      | 3                 |
| Eu41012   | [X]Panic state                                               | 3                 |
| Eu41011   | [X]Panic attack                                              | 3                 |
| Eu41y00   | [X]Other specified anxiety disorders                         | 3                 |
| Eu41300   | [X]Other mixed anxiety disorders                             | 3                 |
| Eu41211   | [X]Mild anxiety depression                                   | 3                 |
| Eu41113   | [X]Anxiety state                                             | 3                 |
| E200500   | Recurrent anxiety                                            | 3                 |
| E200100   | Panic disorder                                               | 3                 |
| E200111   | Panic attack                                                 | 3                 |
| E200400   | Chronic anxiety                                              | 3                 |
| 1B1V.00   | C/O - panic attack                                           | 3                 |
| 1B13.11   | Anxiousness - symptom                                        | 3                 |
| 1B13.00   | Anxiousness                                                  | 3                 |
| E200300   | Anxiety with depression                                      | 3                 |
| Eu93200   | [X]Social anxiety disorder of childhood                      | 2                 |
| Eu34114   | [X]Persistant anxiety depression                             | 2                 |
| Eu40012   | [X]Panic disorder with agoraphobia                           | 2                 |
| Eu40y00   | [X]Other phobic anxiety disorders                            | 2                 |
| Eu41200   | [X]Mixed anxiety and depressive disorder                     | 2                 |
| Eu93y12   | [X]Childhood overanxious disorder                            | 2                 |
| Eu41y11   | [X]Anxiety hysteria                                          | 2                 |
| E2D0.00   | Disturbance of anxiety and fearfulness childhood/adolescent  | 2                 |
| E2D0z00   | Disturbance anxiety and fearfulness childhood/adolescent NOS | 2                 |
| E202100   | Agoraphobia with panic attacks                               | 2                 |
| E292400   | Adjustment reaction with anxious mood                        | 2                 |
| E280.00   | Acute panic state due to acute stress reaction               | 2                 |
| Z4I7.00   | Acknowledging anxiety                                        | 2                 |
| Eu40100   | [X]Social phobias                                            | 1                 |
| Eu40112   | [X]Social neurosis                                           | 1                 |
| Eu93000   | [X]Separation anxiety disorder of childhood                  | 1                 |
| Eu42100   | [X]Predominantly compulsive acts [obsessional rituals]       | 1                 |
| Eu93100   | [X]Phobic anxiety disorder of childhood                      | 1                 |
| Eu42.12   | [X]Obsessive-compulsive neurosis                             | 1                 |
| Eu42.00   | [X]Obsessive - compulsive disorder                           | 1                 |
| Eu45215   | [X]Nosophobia                                                | 1                 |
| Eu46z11   | [X]Neurosis NOS                                              | 1                 |

| Read code | Description                                          | Number of studies |
|-----------|------------------------------------------------------|-------------------|
| Eu40300   | [X]Needle phobia                                     | 1                 |
| Eu45213   | [X]Hypochondriacal neurosis                          | 1                 |
| Eu45212   | [X]Dysmorphophobia nondelusional                     | 1                 |
| Eu51511   | [X]Dream anxiety disorder                            | 1                 |
| Eu40213   | [X]Claustrophobia                                    | 1                 |
| Eu60600   | [X]Anxious [avoidant] personality disorder           | 1                 |
| Eu42.11   | [X]Anankastic neurosis                               | 1                 |
| Eu40011   | [X]Agoraphobia without history of panic disorder     | 1                 |
| Eu40000   | [X]Agoraphobia                                       | 1                 |
| R2y2.00   | [D]Nervousness                                       | 1                 |
| R2y2.12   | [D]Nervous tension                                   | 1                 |
| R2y2.11   | [D]Nerves                                            | 1                 |
| 1BK..00   | Worried                                              | 1                 |
| 1B12.12   | Tension - nervous                                    | 1                 |
| E202300   | Social phobia, fear of eating in public              | 1                 |
| E112000   | Single major depressive episode, unspecified         | 1                 |
| E292000   | Separation anxiety disorder                          | 1                 |
| Z4I7211   | Reducing anxiety                                     | 1                 |
| Z4I7100   | Recognising anxiety                                  | 1                 |
| E29y100   | Other post-traumatic stress disorder                 | 1                 |
| E203z00   | Obsessive-compulsive disorder NOS                    | 1                 |
| E203100   | Obsessional neurosis                                 | 1                 |
| 225J.00   | O/E - panic attack                                   | 1                 |
| 2258.00   | O/E - anxious                                        | 1                 |
| 1465.00   | H/O: depression                                      | 1                 |
| 1466.00   | H/O: anxiety state                                   | 1                 |
| 1B1..00   | General nervous symptoms                             | 1                 |
| E275711   | Compulsive water drinking                            | 1                 |
| E203000   | Compulsive neurosis                                  | 1                 |
| 1P3..00   | Compulsive behaviour                                 | 1                 |
| E202800   | Claustrophobia                                       | 1                 |
| E2D0000   | Childhood and adolescent overanxiousness disturbance | 1                 |
| 1B13.12   | Anxious                                              | 1                 |
| 8G94.00   | Anxiety management training                          | 1                 |
| Z4L1.00   | Anxiety counselling                                  | 1                 |
| E203.11   | Anancastic neurosis                                  | 1                 |
| Z4I7200   | Alleviating anxiety                                  | 1                 |
| E202200   | Agoraphobia without mention of panic attacks         | 1                 |
| 1B12.00   | 'Nerves' - nervousness                               | 1                 |
| 1B12.11   | 'Nerves'                                             | 1                 |

**Table 2. List of Read codes used in the studies of depression.**

| Read code | Description                                                  | Number of studies |
|-----------|--------------------------------------------------------------|-------------------|
| E112.00   | Single major depressive episode                              | 14                |
| E112000   | Single major depressive episode, unspecified                 | 14                |
| E112100   | Single major depressive episode, mild                        | 14                |
| E112200   | Single major depressive episode, moderate                    | 14                |
| E112300   | Single major depressive episode, severe, without psychosis   | 14                |
| E112z00   | Single major depressive episode NOS                          | 14                |
| E135.00   | Agitated depression                                          | 14                |
| E112.11   | Agitated depression                                          | 13                |
| E112.12   | Endogenous depression first episode                          | 13                |
| E112.13   | Endogenous depression first episode                          | 13                |
| E112.14   | Endogenous depression                                        | 13                |
| E112500   | Single major depressive episode, partial or unspec remission | 13                |
| E2B..00   | Depressive disorder NEC                                      | 13                |
| E2B1.00   | Chronic depression                                           | 13                |
| Eu32.00   | [X]Depressive episode                                        | 13                |
| E113.00   | Recurrent major depressive episode                           | 12                |
| E11y200   | Atypical depressive disorder                                 | 12                |
| E11z200   | Masked depression                                            | 12                |
| Eu32.11   | [X]Single episode of depressive reaction                     | 12                |
| Eu32.12   | [X]Single episode of psychogenic depression                  | 12                |
| Eu32.13   | [X]Single episode of reactive depression                     | 12                |
| Eu32000   | [X]Mild depressive episode                                   | 12                |
| Eu32100   | [X]Moderate depressive episode                               | 12                |
| Eu32200   | [X]Severe depressive episode without psychotic symptoms      | 12                |
| Eu32400   | [X]Mild depression                                           | 12                |
| Eu32y00   | [X]Other depressive episodes                                 | 12                |
| Eu32z00   | [X]Depressive episode, unspecified                           | 12                |
| Eu33.00   | [X]Recurrent depressive disorder                             | 12                |
| E112400   | Single major depressive episode, severe, with psychosis      | 11                |
| E113.11   | Endogenous depression - recurrent                            | 11                |
| E130.11   | Psychotic reactive depression                                | 11                |
| Eu32212   | [X]Single episode major depression w/out psychotic symptoms  | 11                |
| Eu32y11   | [X]Atypical depression                                       | 11                |
| Eu32z11   | [X]Depression NOS                                            | 11                |
| Eu32z12   | [X]Depressive disorder NOS                                   | 11                |
| 1B17.00   | Depressed                                                    | 10                |
| E112600   | Single major depressive episode, in full remission           | 10                |
| E113000   | Recurrent major depressive episodes, unspecified             | 10                |
| E113100   | Recurrent major depressive episodes, mild                    | 10                |
| E113200   | Recurrent major depressive episodes, moderate                | 10                |
| E113300   | Recurrent major depressive episodes, severe, no psychosis    | 10                |
| E113500   | Recurrent major depressive episodes,partial/unspec remission | 10                |
| E113700   | Recurrent depression                                         | 10                |
| E113z00   | Recurrent major depressive episode NOS                       | 10                |
| E130.00   | Reactive depressive psychosis                                | 10                |
| E200300   | Anxiety with depression                                      | 10                |
| E291.00   | Prolonged depressive reaction                                | 10                |
| Eu32211   | [X]Single episode agitated depressn w/out psychotic symptoms | 10                |
| Eu32213   | [X]Single episode vital depression w/out psychotic symptoms  | 10                |
| Eu32311   | [X]Single episode of major depression and psychotic symptoms | 10                |

| Read code | Description                                                  | Number of studies |
|-----------|--------------------------------------------------------------|-------------------|
| Eu32313   | [X]Single episode of psychotic depression                    | 10                |
| Eu32y12   | [X]Single episode of masked depression NOS                   | 10                |
| Eu32z13   | [X]Prolonged single episode of reactive depression           | 10                |
| Eu33.11   | [X]Recurrent episodes of depressive reaction                 | 10                |
| Eu33.12   | [X]Recurrent episodes of psychogenic depression              | 10                |
| Eu33.13   | [X]Recurrent episodes of reactive depression                 | 10                |
| Eu33000   | [X]Recurrent depressive disorder, current episode mild       | 10                |
| Eu33100   | [X]Recurrent depressive disorder, current episode moderate   | 10                |
| Eu33211   | [X]Endogenous depression without psychotic symptoms          | 10                |
| Eu33y00   | [X]Other recurrent depressive disorders                      | 10                |
| Eu33z00   | [X]Recurrent depressive disorder, unspecified                | 10                |
| Eu34114   | [X]Persistant anxiety depression                             | 10                |
| 1B1U.00   | Symptoms of depression                                       | 9                 |
| 1B1U.11   | Depressive symptoms                                          | 9                 |
| E113600   | Recurrent major depressive episodes, in full remission       | 9                 |
| Eu32300   | [X]Severe depressive episode with psychotic symptoms         | 9                 |
| Eu32312   | [X]Single episode of psychogenic depressive psychosis        | 9                 |
| Eu32314   | [X]Single episode of reactive depressive psychosis           | 9                 |
| Eu32500   | [X]Major depression, mild                                    | 9                 |
| Eu32600   | [X]Major depression, moderately severe                       | 9                 |
| Eu32700   | [X]Major depression, severe without psychotic symptoms       | 9                 |
| Eu32z14   | [X] Reactive depression NOS                                  | 9                 |
| Eu33214   | [X]Vital depression, recurrent without psychotic symptoms    | 9                 |
| Eu33311   | [X]Endogenous depression with psychotic symptoms             | 9                 |
| Eu33z11   | [X]Monopolar depression NOS                                  | 9                 |
| Eu34113   | [X]Neurotic depression                                       | 9                 |
| Eu41200   | [X]Mixed anxiety and depressive disorder                     | 9                 |
| Eu41211   | [X]Mild anxiety depression                                   | 9                 |
| 1B17.11   | C/O - feeling depressed                                      | 8                 |
| E113400   | Recurrent major depressive episodes, severe, with psychosis  | 8                 |
| E204.00   | Neurotic depression reactive type                            | 8                 |
| Eu33200   | [X]Recurr depress disorder cur epi severe without psyc sympt | 8                 |
| Eu33212   | [X]Major depression, recurrent without psychotic symptoms    | 8                 |
| Eu33400   | [X]Recurrent depressive disorder, currently in remission     | 8                 |
| Eu34111   | [X]Depressive neurosis                                       | 8                 |
| Eu3y111   | [X]Recurrent brief depressive episodes                       | 8                 |
| 1BT..00   | Depressed mood                                               | 7                 |
| 2257.00   | O/E - depressed                                              | 7                 |
| E11..12   | Depressive psychoses                                         | 7                 |
| Eu32800   | [X]Major depression, severe with psychotic symptoms          | 7                 |
| Eu33.14   | [X]Seasonal depressive disorder                              | 7                 |
| Eu33313   | [X]Recurr severe episodes/major depression+psychotic symptom | 7                 |
| Eu33314   | [X]Recurr severe episodes/psychogenic depressive psychosis   | 7                 |
| Eu33315   | [X]Recurrent severe episodes of psychotic depression         | 7                 |
| Eu33316   | [X]Recurrent severe episodes/reactive depressive psychosis   | 7                 |
| 9H90.00   | Depression annual review                                     | 6                 |
| 9H91.00   | Depression medication review                                 | 6                 |
| 9H92.00   | Depression interim review                                    | 6                 |
| 9HA0.00   | On depression register                                       | 6                 |
| E290.00   | Brief depressive reaction                                    | 6                 |
| Eu33300   | [X]Recurrent depress disorder cur epi severe with psyc symp  | 6                 |
| Eu34100   | [X]Dysthymia                                                 | 6                 |
| E118.00   | Seasonal affective disorder                                  | 5                 |

1  
2  
3  
4  
5  
6  
7  
8  
9  
10  
11  
12  
13  
14  
15  
16  
17  
18  
19  
20  
21  
22  
23  
24  
25  
26  
27  
28  
29  
30  
31  
32  
33  
34  
35  
36  
37  
38  
39  
40  
41  
42  
43  
44  
45  
46  
47  
48  
49  
50  
51  
52  
53  
54  
55  
56  
57  
58  
59  
60

| Read code | Description                                                  | Number of studies |
|-----------|--------------------------------------------------------------|-------------------|
| E204.11   | Postnatal depression                                         | 5                 |
| E290z00   | Brief depressive reaction NOS                                | 5                 |
| Eu53011   | [X]Postnatal depression NOS                                  | 5                 |
| Eu53012   | [X]Postpartum depression NOS                                 | 5                 |
| 1465.00   | H/O: depression                                              | 4                 |
| 1BQ..00   | Loss of capacity for enjoyment                               | 4                 |
| 8HHq.00   | Referral for guided self-help for depression                 | 4                 |
| E02y300   | Drug-induced depressive state                                | 4                 |
| Eu33.15   | [X]SAD - Seasonal affective disorder                         | 4                 |
| R007z13   | [D]Postoperative depression                                  | 4                 |
| 1BP0.00   | Loss of interest in previously enjoyable activity            | 3                 |
| 1BT..11   | Low mood                                                     | 3                 |
| 1BU..00   | Loss of hope for the future                                  | 3                 |
| 212S.00   | Depression resolved                                          | 3                 |
| 8CAa.00   | Patient given advice about management of depression          | 3                 |
| 9Ov0.00   | Depression monitoring first letter                           | 3                 |
| 9Ov1.00   | Depression monitoring second letter                          | 3                 |
| 9Ov2.00   | Depression monitoring third letter                           | 3                 |
| 9Ov3.00   | Depression monitoring verbal invite                          | 3                 |
| 9Ov4.00   | Depression monitoring telephone invite                       | 3                 |
| 9k4..00   | Depression - enhanced services administration                | 3                 |
| E001300   | Presenile dementia with depression                           | 3                 |
| E002100   | Senile dementia with depression                              | 3                 |
| E2B0.00   | Postviral depression                                         | 3                 |
| Eu20400   | [X]Post-schizophrenic depression                             | 3                 |
| Eu34112   | [X]Depressive personality disorder                           | 3                 |
| Eu92000   | [X]Depressive conduct disorder                               | 3                 |
| 1JJ..00   | Suspected depression                                         | 2                 |
| 8BK0.00   | Depression management programme                              | 2                 |
| 9HA1.00   | Removed from depression register                             | 2                 |
| 9Ov..00   | Depression monitoring administration                         | 2                 |
| 9k40.00   | Depression - enhanced service completed                      | 2                 |
| 9kQ..00   | On full dose long term treatment depression - enh serv admin | 2                 |
| E115.00   | Bipolar affective disorder, currently depressed              | 2                 |
| E11y.00   | Other and unspecified manic-depressive psychoses             | 2                 |
| E211200   | Depressive personality disorder                              | 2                 |
| Eu25100   | [X]Schizoaffective disorder, depressive type                 | 2                 |
| Eu25111   | [X]Schizoaffective psychosis, depressive type                | 2                 |
| Eu25112   | [X]Schizophreniform psychosis, depressive type               | 2                 |
| Eu32B00   | [X]Antenatal depression                                      | 2                 |
| Eu33213   | [X]Manic-depress psychosis,depressd,no psychotic symptoms    | 2                 |
| Eu34y00   | [X]Other persistent mood affective disorders                 | 2                 |
| Eu34z00   | [X]Persistent mood affective disorder, unspecified           | 2                 |
| Eu3y100   | [X]Other recurrent mood affective disorders                  | 2                 |
| Eu3z.00   | [X]Unspecified mood affective disorder                       | 2                 |
| 1645.00   | Excessive fluid intake                                       | 1                 |
| 1B1J.00   | Emotional problem                                            | 1                 |
| 1B1J.11   | Emotional upset                                              | 1                 |
| 1BO..00   | Mood swings                                                  | 1                 |
| 1BP..00   | Loss of interest                                             | 1                 |
| 1BT..12   | Sad mood                                                     | 1                 |
| 1S4..00   | Mood observations                                            | 1                 |
| 1S40.00   | Dysphoric mood                                               | 1                 |

| Read code | Description                                                  | Number of studies |
|-----------|--------------------------------------------------------------|-------------------|
| 388J.00   | Hospital anxiety and depression scale                        | 1                 |
| 388K.00   | Geriatric depression scale                                   | 1                 |
| 388P.00   | HAD scale: depression score                                  | 1                 |
| 388g.00   | Beck depression inventory second edition score               | 1                 |
| 62T1.00   | Puerperal depression                                         | 1                 |
| 6896.00   | Depression screening using questions                         | 1                 |
| 8O82.00   | Emotional and psychosocial support and advice                | 1                 |
| 9ON3.00   | Stress monitoring default                                    | 1                 |
| 9ON4.00   | Stress monitoring 1st letter                                 | 1                 |
| 9ON5.00   | Stress monitoring 2nd letter                                 | 1                 |
| 9ON6.00   | Stress monitoring 3rd letter                                 | 1                 |
| 9ON7.00   | Stress monitoring verbal inv.                                | 1                 |
| 9ON8.00   | Stress monitoring phone invite                               | 1                 |
| 9ON9.00   | Stress monitoring deleted                                    | 1                 |
| 9ONA.00   | Stress monitoring check done                                 | 1                 |
| 9ONZ.00   | Stress monitoring admin.NOS                                  | 1                 |
| E002.00   | Senile dementia with depressive or paranoid features         | 1                 |
| E002z00   | Senile dementia with depressive or paranoid features NOS     | 1                 |
| E004300   | Arteriosclerotic dementia with depression                    | 1                 |
| E115.11   | Manic-depressive - now depressed                             | 1                 |
| E115000   | Bipolar affective disorder, currently depressed, unspecified | 1                 |
| E115100   | Bipolar affective disorder, currently depressed, mild        | 1                 |
| E115200   | Bipolar affective disorder, currently depressed, moderate    | 1                 |
| E115300   | Bipolar affect disord, now depressed, severe, no psychosis   | 1                 |
| E115400   | Bipolar affect disord, now depressed, severe with psychosis  | 1                 |
| E115500   | Bipolar affect disord, now depressed, part/unspec remission  | 1                 |
| E115600   | Bipolar affective disorder, now depressed, in full remission | 1                 |
| E115z00   | Bipolar affective disorder, currently depressed, NOS         | 1                 |
| E11y000   | Unspecified manic-depressive psychoses                       | 1                 |
| E11z100   | Rebound mood swings                                          | 1                 |
| E222      |                                                              | 1                 |
| E283.00   | Other acute stress reactions                                 | 1                 |
| E283z00   | Other acute stress reaction NOS                              | 1                 |
| E284.00   | Stress reaction causing mixed disturbance of emotion/conduct | 1                 |
| E28z.00   | Acute stress reaction NOS                                    | 1                 |
| E292.00   | Adjustment reaction, predominant disturbance other emotions  | 1                 |
| E292400   | Adjustment reaction with anxious mood                        | 1                 |
| E292y00   | Adjustment reaction with mixed disturbance of emotion        | 1                 |
| E292z00   | Adjustment reaction with disturbance of other emotion NOS    | 1                 |
| E294.00   | Adjustment reaction with disturbance emotion and conduct     | 1                 |
| E2C4.00   | Mixed disturbance of conduct and emotion                     | 1                 |
| E2C4z00   | Mixed disturbance of conduct and emotion NOS                 | 1                 |
| E35       |                                                              | 1                 |
| E4J5      |                                                              | 1                 |
| Eu02z16   | [X] Senile dementia, depressed or paranoid type              | 1                 |
| Eu3..00   | [X]Mood - affective disorders                                | 1                 |
| Eu31.11   | [X]Manic-depressive illness                                  | 1                 |
| Eu31300   | [X]Bipolar affect disorder cur epi mild or moderate depressn | 1                 |
| Eu31400   | [X]Bipol aff disord, curr epis sev depress, no psychot symp  | 1                 |
| Eu31500   | [X]Bipolar affect dis cur epi severe depres with psyc symp   | 1                 |
| Eu31600   | [X]Bipolar affective disorder, current episode mixed         | 1                 |
| Eu31y00   | [X]Other bipolar affective disorders                         | 1                 |
| Eu31y11   | [X]Bipolar II disorder                                       | 1                 |

1  
2  
3  
4  
5  
6  
7  
8  
9  
10  
11  
12  
13  
14  
15  
16  
17  
18  
19  
20  
21  
22  
23  
24  
25  
26  
27  
28  
29  
30  
31  
32  
33  
34  
35  
36  
37  
38  
39  
40  
41  
42  
43  
44  
45  
46  
47  
48  
49  
50  
51  
52  
53  
54  
55  
56  
57  
58  
59  
60

| Read code | Description                                                  | Number of studies |
|-----------|--------------------------------------------------------------|-------------------|
| Eu31z00   | [X]Bipolar affective disorder, unspecified                   | 1                 |
| Eu33312   | [X]Manic-depress psychosis,depressed type+psychotic symptoms | 1                 |
| Eu34.00   | [X]Persistent mood affective disorders                       | 1                 |
| Eu3y.00   | [X]Other mood affective disorders                            | 1                 |
| Eu3y000   | [X]Other single mood affective disorders                     | 1                 |
| Eu3y011   | [X]Mixed affective episode                                   | 1                 |
| Eu3yy00   | [X]Other specified mood affective disorders                  | 1                 |
| Eu4..00   | [X]Neurotic, stress - related and somoform disorders         | 1                 |
| Eu43.00   | [X]Reaction to severe stress, and adjustment disorders       | 1                 |
| Eu43000   | [X]Acute stress reaction                                     | 1                 |
| Eu43012   | [X]Acute reaction to stress                                  | 1                 |
| Eu43y00   | [X]Other reactions to severe stress                          | 1                 |
| Eu43z00   | [X]Reaction to severe stress, unspecified                    | 1                 |
| Eu92.11   | [X]Emotional behavioural problems                            | 1                 |
| R007z14   | [D]Work stress                                               | 1                 |
| ZR2A.00   | Beck depression inventory                                    | 1                 |
| ZR2A.11   | BDI - Beck depression inventory                              | 1                 |
| ZR2B.00   | Beck hopelessness scale                                      | 1                 |
| ZR2G.00   | Behaviour and mood disturbance scale                         | 1                 |
| ZR2h.00   | Brief depression rating scale                                | 1                 |
| ZR7..00   | Depression anxiety scale                                     | 1                 |
| ZR8..00   | Depression self rating scale                                 | 1                 |
| ZR8..11   | DSRS - Depression self rating scale                          | 1                 |
| ZRBY.00   | Edinburgh postnatal depression scale                         | 1                 |
| ZRBY.11   | EPDS - Edinburgh postnatal depression scale                  | 1                 |
| ZRL6.00   | Geriatric depression scale                                   | 1                 |
| ZRL6.11   | GDS - Geriatric depression scale                             | 1                 |
| ZRL6.12   | Geriatric depression score                                   | 1                 |
| ZRLU.00   | Hamilton rating scale for depression                         | 1                 |
| ZRLU.11   | HAMD - Hamilton rating scale for depression                  | 1                 |
| ZRLU.12   | HRSD - Hamilton rating scale for depression                  | 1                 |
| ZRLfH00   | Health of the Nation Outcome Scale item 7 - depressed mood   | 1                 |
| ZRLfI00   | Health of the Nation Outcome Scale item 7 - depressed mood   | 1                 |
| ZRLn.00   | Hopelessness scale                                           | 1                 |
| ZRLr.00   | Hospital anxiety and depression scale                        | 1                 |
| ZRLr.11   | HAD - Hospital anxiety and depression scale                  | 1                 |
| ZRLr.12   | HADS - Hospital anxiety and depression scale                 | 1                 |
| ZRVM.00   | Leeds scale for the self-assessment of anxiety & depression  | 1                 |
| ZRaH.00   | Mood affective checklist                                     | 1                 |
| ZRaH.11   | MACL - Mood affective checklist                              | 1                 |
| ZRbS.00   | Positive and negative affect schedule                        | 1                 |
| ZRby.00   | Profile of mood states                                       | 1                 |
| ZRby.11   | POMS - Profile of mood states                                | 1                 |
| ZRrI.00   | Wakefield self-assessment depression inventory               | 1                 |
| ZRrY.00   | WHO depression scale                                         | 1                 |
| ZRrc.00   | Zung self-rating depression scale                            | 1                 |
| ZRrc.11   | SDS - Zung self-rating depression scale                      | 1                 |
| ZV11100   | [V]Personal history of affective disorder                    | 1                 |
| ZV11111   | [V]Personal history of manic-depressive psychosis            | 1                 |
| ZV11112   | [V]Personal history of manic-depressive psychosis            | 1                 |

**Table 3. List of Read codes used in the studies of composite outcomes of anxiety and depression.**

| Read code | Description                                                  | Number of studies |
|-----------|--------------------------------------------------------------|-------------------|
| Eu32200   | [X]Severe depressive episode without psychotic symptoms      | 2                 |
| Eu33z00   | [X]Recurrent depressive disorder, unspecified                | 2                 |
| Eu33400   | [X]Recurrent depressive disorder, currently in remission     | 2                 |
| Eu33100   | [X]Recurrent depressive disorder, current episode moderate   | 2                 |
| Eu33000   | [X]Recurrent depressive disorder, current episode mild       | 2                 |
| Eu33.00   | [X]Recurrent depressive disorder                             | 2                 |
| Eu33200   | [X]Recurr depress disorder cur epi severe without psyc sympt | 2                 |
| Eu41000   | [X]Panic disorder [episodic paroxysmal anxiety]              | 2                 |
| Eu41y00   | [X]Other specified anxiety disorders                         | 2                 |
| Eu33y00   | [X]Other recurrent depressive disorders                      | 2                 |
| Eu32y00   | [X]Other depressive episodes                                 | 2                 |
| Eu41.00   | [X]Other anxiety disorders                                   | 2                 |
| Eu32100   | [X]Moderate depressive episode                               | 2                 |
| Eu41200   | [X]Mixed anxiety and depressive disorder                     | 2                 |
| Eu32000   | [X]Mild depressive episode                                   | 2                 |
| Eu32400   | [X]Mild depression                                           | 2                 |
| Eu41100   | [X]Generalized anxiety disorder                              | 2                 |
| Eu34100   | [X]Dysthymia                                                 | 2                 |
| Eu32z00   | [X]Depressive episode, unspecified                           | 2                 |
| Eu32.00   | [X]Depressive episode                                        | 2                 |
| Eu41z00   | [X]Anxiety disorder, unspecified                             | 2                 |
| 1B1U.00   | Symptoms of depression                                       | 2                 |
| E112000   | Single major depressive episode, unspecified                 | 2                 |
| E112300   | Single major depressive episode, severe, without psychosis   | 2                 |
| E112500   | Single major depressive episode, partial or unspec remission | 2                 |
| E112200   | Single major depressive episode, moderate                    | 2                 |
| E112100   | Single major depressive episode, mild                        | 2                 |
| E112600   | Single major depressive episode, in full remission           | 2                 |
| E112z00   | Single major depressive episode NOS                          | 2                 |
| E112.00   | Single major depressive episode                              | 2                 |
| E118.00   | Seasonal affective disorder                                  | 2                 |
| E113500   | Recurrent major depressive episodes,partial/unspec remission | 2                 |
| E113000   | Recurrent major depressive episodes, unspecified             | 2                 |
| E113300   | Recurrent major depressive episodes, severe, no psychosis    | 2                 |
| E113200   | Recurrent major depressive episodes, moderate                | 2                 |
| E113100   | Recurrent major depressive episodes, mild                    | 2                 |
| E113600   | Recurrent major depressive episodes, in full remission       | 2                 |
| E113z00   | Recurrent major depressive episode NOS                       | 2                 |
| E113.00   | Recurrent major depressive episode                           | 2                 |
| E113700   | Recurrent depression                                         | 2                 |
| E200500   | Recurrent anxiety                                            | 2                 |
| E291.00   | Prolonged depressive reaction                                | 2                 |
| E2B0.00   | Postviral depression                                         | 2                 |
| E200100   | Panic disorder                                               | 2                 |
| 2257.00   | O/E - depressed                                              | 2                 |
| E204.00   | Neurotic depression reactive type                            | 2                 |
| E200200   | Generalised anxiety disorder                                 | 2                 |
| E2B..00   | Depressive disorder NEC                                      | 2                 |
| 1BT..00   | Depressed mood                                               | 2                 |
| 1B17.00   | Depressed                                                    | 2                 |



1  
2  
3  
4  
5  
6  
7  
8  
9  
10  
11  
12  
13  
14  
15  
16  
17  
18  
19  
20  
21  
22  
23  
24  
25  
26  
27  
28  
29  
30  
31  
32  
33  
34  
35  
36  
37  
38  
39  
40  
41  
42  
43  
44  
45  
46  
47  
48  
49  
50  
51  
52  
53  
54  
55  
56  
57  
58  
59  
60

| Read code | Description                                                  | Number of studies |
|-----------|--------------------------------------------------------------|-------------------|
| E2B1.00   | Chronic depression                                           | 2                 |
| E200400   | Chronic anxiety                                              | 2                 |
| E200300   | Anxiety with depression                                      | 2                 |
| E200.00   | Anxiety states                                               | 2                 |
| E200000   | Anxiety state unspecified                                    | 2                 |
| E200z00   | Anxiety state NOS                                            | 2                 |
| E135.00   | Agitated depression                                          | 2                 |
| Eu33214   | [X]Vital depression, recurrent without psychotic symptoms    | 1                 |
| Eu3z.00   | [X]Unspecified mood affective disorder                       | 1                 |
| Eu40100   | [X]Social phobias                                            | 1                 |
| Eu40112   | [X]Social neurosis                                           | 1                 |
| Eu32213   | [X]Single episode vital depression w/out psychotic symptoms  | 1                 |
| Eu32314   | [X]Single episode of reactive depressive psychosis           | 1                 |
| Eu32.13   | [X]Single episode of reactive depression                     | 1                 |
| Eu32313   | [X]Single episode of psychotic depression                    | 1                 |
| Eu32312   | [X]Single episode of psychogenic depressive psychosis        | 1                 |
| Eu32.12   | [X]Single episode of psychogenic depression                  | 1                 |
| Eu32y12   | [X]Single episode of masked depression NOS                   | 1                 |
| Eu32311   | [X]Single episode of major depression and psychotic symptoms | 1                 |
| Eu32.11   | [X]Single episode of depressive reaction                     | 1                 |
| Eu32212   | [X]Single episode major depression w/out psychotic symptoms  | 1                 |
| Eu32211   | [X]Single episode agitated depressn w/out psychotic symptoms | 1                 |
| Eu32300   | [X]Severe depressive episode with psychotic symptoms         | 1                 |
| Eu33.14   | [X]Seasonal depressive disorder                              | 1                 |
| Eu33.15   | [X]SAD - Seasonal affective disorder                         | 1                 |
| Eu06y11   | [X]Right hemispheric organic affective disorder              | 1                 |
| Eu33316   | [X]Recurrent severe episodes/reactive depressive psychosis   | 1                 |
| Eu33315   | [X]Recurrent severe episodes of psychotic depression         | 1                 |
| Eu33.13   | [X]Recurrent episodes of reactive depression                 | 1                 |
| Eu33.12   | [X]Recurrent episodes of psychogenic depression              | 1                 |
| Eu33.11   | [X]Recurrent episodes of depressive reaction                 | 1                 |
| Eu33300   | [X]Recurrent depress disorder cur epi severe with psyc symp  | 1                 |
| Eu3y111   | [X]Recurrent brief depressive episodes                       | 1                 |
| Eu33314   | [X]Recurr severe episodes/psychogenic depressive psychosis   | 1                 |
| Eu33313   | [X]Recurr severe episodes/major depression+psychotic symptom | 1                 |
| Eu43z00   | [X]Reaction to severe stress, unspecified                    | 1                 |
| Eu43.00   | [X]Reaction to severe stress, and adjustment disorders       | 1                 |
| Eu32z13   | [X]Prolonged single episode of reactive depression           | 1                 |
| Eu42100   | [X]Predominantly compulsive acts [obsessional rituals]       | 1                 |
| Eu20400   | [X]Post-schizophrenic depression                             | 1                 |
| Eu43100   | [X]Post - traumatic stress disorder                          | 1                 |
| Eu40.00   | [X]Phobic anxiety disorders                                  | 1                 |
| Eu34.00   | [X]Persistent mood affective disorders                       | 1                 |
| Eu34z00   | [X]Persistent mood affective disorder, unspecified           | 1                 |
| Eu34114   | [X]Persistant anxiety depression                             | 1                 |
| Eu41012   | [X]Panic state                                               | 1                 |
| Eu40012   | [X]Panic disorder with agoraphobia                           | 1                 |
| Eu41011   | [X]Panic attack                                              | 1                 |
| Eu3yy00   | [X]Other specified mood affective disorders                  | 1                 |
| Eu3y000   | [X]Other single mood affective disorders                     | 1                 |
| Eu3y100   | [X]Other recurrent mood affective disorders                  | 1                 |
| Eu43y00   | [X]Other reactions to severe stress                          | 1                 |
| Eu34y00   | [X]Other persistent mood affective disorders                 | 1                 |

| Read code | Description                                                  | Number of studies |
|-----------|--------------------------------------------------------------|-------------------|
| Eu42y00   | [X]Other obsessive-compulsive disorders                      | 1                 |
| Eu3y.00   | [X]Other mood affective disorders                            | 1                 |
| Eu41300   | [X]Other mixed anxiety disorders                             | 1                 |
| Eu31y00   | [X]Other bipolar affective disorders                         | 1                 |
| Eu05300   | [X]Organic mood [affective] disorders                        | 1                 |
| Eu05400   | [X]Organic anxiety disorder                                  | 1                 |
| Eu60513   | [X]Obsessive-compulsive personality disorder                 | 1                 |
| Eu42.12   | [X]Obsessive-compulsive neurosis                             | 1                 |
| Eu42z00   | [X]Obsessive-compulsive disorder, unspecified                | 1                 |
| Eu42.00   | [X]Obsessive - compulsive disorder                           | 1                 |
| Eu4..00   | [X]Neurotic, stress - related and somoform disorders         | 1                 |
| Eu34113   | [X]Neurotic depression                                       | 1                 |
| Eu3..00   | [X]Mood - affective disorders                                | 1                 |
| Eu33z11   | [X]Monopolar depression NOS                                  | 1                 |
| Eu3y011   | [X]Mixed affective episode                                   | 1                 |
| Eu41211   | [X]Mild anxiety depression                                   | 1                 |
| Eu31.13   | [X]Manic-depressive reaction                                 | 1                 |
| Eu31.12   | [X]Manic-depressive psychosis                                | 1                 |
| Eu31.11   | [X]Manic-depressive illness                                  | 1                 |
| Eu33312   | [X]Manic-depress psychosis,depressed type+psychotic symptoms | 1                 |
| Eu33213   | [X]Manic-depress psychosis,depressd,no psychotic symptoms    | 1                 |
| Eu32700   | [X]Major depression, severe without psychotic symptoms       | 1                 |
| Eu32800   | [X]Major depression, severe with psychotic symptoms          | 1                 |
| Eu33212   | [X]Major depression, recurrent without psychotic symptoms    | 1                 |
| Eu32600   | [X]Major depression, moderately severe                       | 1                 |
| Eu32500   | [X]Major depression, mild                                    | 1                 |
| Eu33211   | [X]Endogenous depression without psychotic symptoms          | 1                 |
| Eu33311   | [X]Endogenous depression with psychotic symptoms             | 1                 |
| Eu51511   | [X]Dream anxiety disorder                                    | 1                 |
| Eu34112   | [X]Depressive personality disorder                           | 1                 |
| Eu34111   | [X]Depressive neurosis                                       | 1                 |
| Eu32z12   | [X]Depressive disorder NOS                                   | 1                 |
| Eu92000   | [X]Depressive conduct disorder                               | 1                 |
| Eu32z11   | [X]Depression NOS                                            | 1                 |
| Eu60511   | [X]Compulsive personality disorder                           | 1                 |
| Eu63011   | [X]Compulsive gambling                                       | 1                 |
| Eu43013   | [X]Combat fatigue                                            | 1                 |
| Eu31z00   | [X]Bipolar affective disorder, unspecified                   | 1                 |
| Eu31700   | [X]Bipolar affective disorder, currently in remission        | 1                 |
| Eu31600   | [X]Bipolar affective disorder, current episode mixed         | 1                 |
| Eu31900   | [X]Bipolar affective disorder type II                        | 1                 |
| Eu31800   | [X]Bipolar affective disorder type I                         | 1                 |
| Eu31.00   | [X]Bipolar affective disorder                                | 1                 |
| Eu31300   | [X]Bipolar affect disorder cur epi mild or moderate depressn | 1                 |
| Eu31500   | [X]Bipolar affect dis cur epi severe depres with psyc symp   | 1                 |
| Eu31y11   | [X]Bipolar II disorder                                       | 1                 |
| Eu31911   | [X]Bipolar II disorder                                       | 1                 |
| Eu31400   | [X]Bipol aff disord, curr epi sev depress, no psychot symp   | 1                 |
| Eu32y11   | [X]Atypical depression                                       | 1                 |
| Eu41113   | [X]Anxiety state                                             | 1                 |
| Eu41112   | [X]Anxiety reaction                                          | 1                 |
| Eu41111   | [X]Anxiety neurosis                                          | 1                 |
| Eu41y11   | [X]Anxiety hysteria                                          | 1                 |

1  
2  
3  
4  
5  
6  
7  
8  
9  
10  
11  
12  
13  
14  
15  
16  
17  
18  
19  
20  
21  
22  
23  
24  
25  
26  
27  
28  
29  
30  
31  
32  
33  
34  
35  
36  
37  
38  
39  
40  
41  
42  
43  
44  
45  
46  
47  
48  
49  
50  
51  
52  
53  
54  
55  
56  
57  
58  
59  
60

| Read code | Description                                                  | Number of studies |
|-----------|--------------------------------------------------------------|-------------------|
| Eu41z11   | [X]Anxiety NOS                                               | 1                 |
| Eu42.11   | [X]Anankastic neurosis                                       | 1                 |
| Eu40011   | [X]Agoraphobia without history of panic disorder             | 1                 |
| Eu40000   | [X]Agoraphobia                                               | 1                 |
| Eu3z.11   | [X]Affective psychosis NOS                                   | 1                 |
| Eu34011   | [X]Affective personality disorder                            | 1                 |
| Eu43000   | [X]Acute stress reaction                                     | 1                 |
| Eu43012   | [X]Acute reaction to stress                                  | 1                 |
| Eu32z14   | [X] Reactive depression NOS                                  | 1                 |
| ZV11112   | [V]Personal history of manic-depressive psychosis            | 1                 |
| ZV11111   | [V]Personal history of manic-depressive psychosis            | 1                 |
| ZV11100   | [V]Personal history of affective disorder                    | 1                 |
| R2y2.00   | [D]Nervousness                                               | 1                 |
| 1BK..00   | Worried                                                      | 1                 |
| E11y000   | Unspecified manic-depressive psychoses                       | 1                 |
| E117400   | Unspecified bipolar affective disorder,severe with psychosis | 1                 |
| E117000   | Unspecified bipolar affective disorder, unspecified          | 1                 |
| E117300   | Unspecified bipolar affective disorder, severe, no psychosis | 1                 |
| E117200   | Unspecified bipolar affective disorder, moderate             | 1                 |
| E117100   | Unspecified bipolar affective disorder, mild                 | 1                 |
| E117600   | Unspecified bipolar affective disorder, in full remission    | 1                 |
| E117z00   | Unspecified bipolar affective disorder, NOS                  | 1                 |
| E117.00   | Unspecified bipolar affective disorder                       | 1                 |
| E117500   | Unspecified bipolar affect disord, partial/unspec remission  | 1                 |
| E11z000   | Unspecified affective psychoses NOS                          | 1                 |
| E211000   | Unspecified affective personality disorder                   | 1                 |
| 1JJ..00   | Suspected depression                                         | 1                 |
| E284.00   | Stress reaction causing mixed disturbance of emotion/conduct | 1                 |
| 67J..00   | Stress counselling                                           | 1                 |
| E202.11   | Social phobic disorders                                      | 1                 |
| E112400   | Single major depressive episode, severe, with psychosis      | 1                 |
| E002z00   | Senile dementia with depressive or paranoid features NOS     | 1                 |
| E002.00   | Senile dementia with depressive or paranoid features         | 1                 |
| E002100   | Senile dementia with depression                              | 1                 |
| 1BT..12   | Sad mood                                                     | 1                 |
| 8HHq.00   | Referral for guided self-help for depression                 | 1                 |
| 8HHp.00   | Referral for guided self-help for anxiety                    | 1                 |
| Z4I7211   | Reducing anxiety                                             | 1                 |
| E113400   | Recurrent major depressive episodes, severe, with psychosis  | 1                 |
| Z4I7100   | Recognising anxiety                                          | 1                 |
| E11z100   | Rebound mood swings                                          | 1                 |
| E130.00   | Reactive depressive psychosis                                | 1                 |
| E130.11   | Psychotic reactive depression                                | 1                 |
| E001300   | Presenile dementia with depression                           | 1                 |
| E2A2.11   | Post-traumatic brain syndrome                                | 1                 |
| E202.00   | Phobic disorders                                             | 1                 |
| E202.12   | Phobic anxiety                                               | 1                 |
| E202000   | Phobia unspecified                                           | 1                 |
| 8CAa.00   | Patient given advice about management of depression          | 1                 |
| E200111   | Panic attack                                                 | 1                 |
| E29y100   | Other post-traumatic stress disorder                         | 1                 |
| E11y300   | Other mixed manic-depressive psychoses                       | 1                 |
| E11yz00   | Other and unspecified manic-depressive psychoses NOS         | 1                 |

| Read code | Description                                                  | Number of studies |
|-----------|--------------------------------------------------------------|-------------------|
| E11y.00   | Other and unspecified manic-depressive psychoses             | 1                 |
| E11z.00   | Other and unspecified affective psychoses                    | 1                 |
| E11zz00   | Other affective psychosis NOS                                | 1                 |
| E283.00   | Other acute stress reactions                                 | 1                 |
| E283z00   | Other acute stress reaction NOS                              | 1                 |
| E03y200   | Organic affective syndrome                                   | 1                 |
| 9kQ..00   | On full dose long term treatment depression - enh serv admin | 1                 |
| 9HA0.00   | On depression register                                       | 1                 |
| E203.00   | Obsessive-compulsive disorders                               | 1                 |
| E203z00   | Obsessive-compulsive disorder NOS                            | 1                 |
| E214100   | Obsessional personality                                      | 1                 |
| E203100   | Obsessional neurosis                                         | 1                 |
| 225J.00   | O/E - panic attack                                           | 1                 |
| 2259.00   | O/E - nervous                                                | 1                 |
| 225K.00   | O/E - fearful mood                                           | 1                 |
| 2253.00   | O/E - distressed                                             | 1                 |
| 2258.00   | O/E - anxious                                                | 1                 |
| E116000   | Mixed bipolar affective disorder, unspecified                | 1                 |
| E116300   | Mixed bipolar affective disorder, severe, without psychosis  | 1                 |
| E116400   | Mixed bipolar affective disorder, severe, with psychosis     | 1                 |
| E116500   | Mixed bipolar affective disorder, partial/unspec remission   | 1                 |
| E116200   | Mixed bipolar affective disorder, moderate                   | 1                 |
| E116100   | Mixed bipolar affective disorder, mild                       | 1                 |
| E116600   | Mixed bipolar affective disorder, in full remission          | 1                 |
| E116z00   | Mixed bipolar affective disorder, NOS                        | 1                 |
| E116.00   | Mixed bipolar affective disorder                             | 1                 |
| E11z200   | Masked depression                                            | 1                 |
| E115.11   | Manic-depressive - now depressed                             | 1                 |
| 13Y3.00   | Manic-depression association member                          | 1                 |
| 1BT..11   | Low mood                                                     | 1                 |
| 1BU..00   | Loss of hope for the future                                  | 1                 |
| 1BQ..00   | Loss of capacity for enjoyment                               | 1                 |
| 146D.00   | H/O: manic depressive disorder                               | 1                 |
| 1465.00   | H/O: depression                                              | 1                 |
| 1466.00   | H/O: anxiety state                                           | 1                 |
| 1B1H.00   | Frightened                                                   | 1                 |
| Z522600   | Flooding - obsessional compulsive disorder                   | 1                 |
| 1B1T.00   | Feeling stressed                                             | 1                 |
| 16ZB100   | Feeling low or worried                                       | 1                 |
| E202D00   | Fear of death                                                | 1                 |
| 1B1H.11   | Fear                                                         | 1                 |
| 9hC..00   | Exception reporting: depression quality indicators           | 1                 |
| 9hC0.00   | Excepted from depression quality indicators: Patient unsuita | 1                 |
| 9hC1.00   | Excepted from depression quality indicators: Informed dissen | 1                 |
| E112.13   | Endogenous depression first episode                          | 1                 |
| E112.12   | Endogenous depression first episode                          | 1                 |
| E113.11   | Endogenous depression - recurrent                            | 1                 |
| E112.14   | Endogenous depression                                        | 1                 |
| 9N54.00   | Encounter for fear                                           | 1                 |
| 1B1U.11   | Depressive symptoms                                          | 1                 |
| E11..12   | Depressive psychoses                                         | 1                 |
| E211200   | Depressive personality disorder                              | 1                 |
| 9Ov3.00   | Depression monitoring verbal invite                          | 1                 |

|    | Read code | Description                                                  | Number of studies |
|----|-----------|--------------------------------------------------------------|-------------------|
| 1  |           |                                                              |                   |
| 2  |           |                                                              |                   |
| 3  |           |                                                              |                   |
| 4  |           |                                                              |                   |
| 5  | 9Ov2.00   | Depression monitoring third letter                           | 1                 |
| 6  | 9Ov4.00   | Depression monitoring telephone invite                       | 1                 |
| 7  | 9Ov1.00   | Depression monitoring second letter                          | 1                 |
| 8  | 9Ov0.00   | Depression monitoring first letter                           | 1                 |
| 9  | 9Ov..00   | Depression monitoring administration                         | 1                 |
| 10 | 9H91.00   | Depression medication review                                 | 1                 |
| 11 | 8BK0.00   | Depression management programme                              | 1                 |
| 12 | 9H92.00   | Depression interim review                                    | 1                 |
| 13 | 9H90.00   | Depression annual review                                     | 1                 |
| 14 | 9k4..00   | Depression - enhanced services administration                | 1                 |
| 15 | 9k40.00   | Depression - enhanced service completed                      | 1                 |
| 16 | E214.00   | Compulsive personality disorders                             | 1                 |
| 17 | E214z00   | Compulsive personality disorder NOS                          | 1                 |
| 18 | E203000   | Compulsive neurosis                                          | 1                 |
| 19 | 1P3..00   | Compulsive behaviour                                         | 1                 |
| 20 | E28..11   | Combat fatigue                                               | 1                 |
| 21 | 1B1V.00   | C/O - panic attack                                           | 1                 |
| 22 | 1B17.11   | C/O - feeling depressed                                      | 1                 |
| 23 | E290z00   | Brief depressive reaction NOS                                | 1                 |
| 24 | E290.00   | Brief depressive reaction                                    | 1                 |
| 25 | E11..11   | Bipolar psychoses                                            | 1                 |
| 26 | E115600   | Bipolar affective disorder, now depressed, in full remission | 1                 |
| 27 | E115000   | Bipolar affective disorder, currently depressed, unspecified | 1                 |
| 28 | E115200   | Bipolar affective disorder, currently depressed, moderate    | 1                 |
| 29 | E115100   | Bipolar affective disorder, currently depressed, mild        | 1                 |
| 30 | E115z00   | Bipolar affective disorder, currently depressed, NOS         | 1                 |
| 31 | E115.00   | Bipolar affective disorder, currently depressed              | 1                 |
| 32 | E115300   | Bipolar affect disord, now depressed, severe, no psychosis   | 1                 |
| 33 | E115400   | Bipolar affect disord, now depressed, severe with psychosis  | 1                 |
| 34 | E115500   | Bipolar affect disord, now depressed, part/unspec remission  | 1                 |
| 35 | E11y200   | Atypical depressive disorder                                 | 1                 |
| 36 | E004300   | Arteriosclerotic dementia with depression                    | 1                 |
| 37 | 1B1H.12   | Apprehension                                                 | 1                 |
| 38 | 1B13.00   | Anxiousness                                                  | 1                 |
| 39 | 8G94.00   | Anxiety management training                                  | 1                 |
| 40 | Z4L1.00   | Anxiety counselling                                          | 1                 |
| 41 | 173f.00   | Anxiety about breathlessness                                 | 1                 |
| 42 | 6659000   | Antidepressant drug treatment started                        | 1                 |
| 43 | E214000   | Anankastic personality                                       | 1                 |
| 44 | E203.11   | Anancastic neurosis                                          | 1                 |
| 45 | Z4I7200   | Alleviating anxiety                                          | 1                 |
| 46 | E202200   | Agoraphobia without mention of panic attacks                 | 1                 |
| 47 | E202100   | Agoraphobia with panic attacks                               | 1                 |
| 48 | E112.11   | Agitated depression                                          | 1                 |
| 49 | E11..00   | Affective psychoses                                          | 1                 |
| 50 | E211.00   | Affective personality disorder                               | 1                 |
| 51 | E292400   | Adjustment reaction with anxious mood                        | 1                 |
| 52 | E282.00   | Acute stupor state due to acute stress reaction              | 1                 |
| 53 | E28z.00   | Acute stress reaction NOS                                    | 1                 |
| 54 | E28..00   | Acute reaction to stress                                     | 1                 |
| 55 | E283100   | Acute posttrauma stress state                                | 1                 |
| 56 | E280.00   | Acute panic state due to acute stress reaction               | 1                 |
| 57 | E281.00   | Acute fugue state due to acute stress reaction               | 1                 |
| 58 |           |                                                              |                   |
| 59 |           |                                                              |                   |
| 60 |           |                                                              |                   |

| Read code | Description            | Number of studies |
|-----------|------------------------|-------------------|
| Z4I7.00   | Acknowledging anxiety  | 1                 |
| 1B12.00   | 'Nerves' - nervousness | 1                 |
| 9kQ..11   |                        | 1                 |

For peer review only

**Table 4. List of Read codes used in the studies of cognitive impairment.**

| Read code | Description                                                  | Number of studies |
|-----------|--------------------------------------------------------------|-------------------|
| Eu01.00   | [X]Vascular dementia                                         | 13                |
| Eu01200   | [X]Subcortical vascular dementia                             | 13                |
| Eu00112   | [X]Senile dementia,Alzheimer's type                          | 13                |
| Eu00011   | [X]Presenile dementia,Alzheimer's type                       | 13                |
| Eu01100   | [X]Multi-infarct dementia                                    | 13                |
| Eu00.00   | [X]Dementia in Alzheimer's disease                           | 13                |
| Eu01.11   | [X]Arteriosclerotic dementia                                 | 13                |
| Eu00z11   | [X]Alzheimer's dementia unspec                               | 13                |
| E000.00   | Uncomplicated senile dementia                                | 13                |
| E004.11   | Multi infarct dementia                                       | 13                |
| E004.00   | Arteriosclerotic dementia                                    | 13                |
| F110000   | Alzheimer's disease with early onset                         | 13                |
| F110.00   | Alzheimer's disease                                          | 13                |
| Eu01z00   | [X]Vascular dementia, unspecified                            | 12                |
| Eu01000   | [X]Vascular dementia of acute onset                          | 12                |
| Eu00012   | [X]Primary degen dementia, Alzheimer's type, presenile onset | 12                |
| Eu00113   | [X]Primary degen dementia of Alzheimer's type, senile onset  | 12                |
| Eu01111   | [X]Predominantly cortical dementia                           | 12                |
| Eu00z00   | [X]Dementia in Alzheimer's disease, unspecified              | 12                |
| Eu00100   | [X]Dementia in Alzheimer's disease with late onset           | 12                |
| Eu00000   | [X]Dementia in Alzheimer's disease with early onset          | 12                |
| Eu00200   | [X]Dementia in Alzheimer's dis, atypical or mixed type       | 12                |
| Eu00013   | [X]Alzheimer's disease type 2                                | 12                |
| Eu00111   | [X]Alzheimer's disease type 1                                | 12                |
| E004000   | Uncomplicated arteriosclerotic dementia                      | 12                |
| E004200   | Arteriosclerotic dementia with paranoia                      | 12                |
| E004300   | Arteriosclerotic dementia with depression                    | 12                |
| E004100   | Arteriosclerotic dementia with delirium                      | 12                |
| E004z00   | Arteriosclerotic dementia NOS                                | 12                |
| F110100   | Alzheimer's disease with late onset                          | 12                |
| Eu01y00   | [X]Other vascular dementia                                   | 11                |
| Eu01300   | [X]Mixed cortical and subcortical vascular dementia          | 11                |
| Eu02.00   | [X]Dementia in other diseases classified elsewhere           | 11                |
| Eu02300   | [X]Dementia in Parkinson's disease                           | 11                |
| Eu02z00   | [X] Unspecified dementia                                     | 11                |
| Eu02z14   | [X] Senile dementia NOS                                      | 11                |
| E00..12   | Senile/presenile dementia                                    | 11                |
| E002000   | Senile dementia with paranoia                                | 11                |
| E002100   | Senile dementia with depression                              | 11                |
| E001.00   | Presenile dementia                                           | 11                |
| E041.00   | Dementia in conditions EC                                    | 11                |
| Fyu3000   | [X]Other Alzheimer's disease                                 | 10                |
| Eu02500   | [X]Lewy body dementia                                        | 10                |
| Eu02y00   | [X]Dementia in other specified diseases classif elsewhere    | 10                |
| Eu04100   | [X]Delirium superimposed on dementia                         | 10                |
| Eu02z16   | [X] Senile dementia, depressed or paranoid type              | 10                |
| Eu02z13   | [X] Primary degenerative dementia NOS                        | 10                |
| Eu02z11   | [X] Presenile dementia NOS                                   | 10                |
| E001000   | Uncomplicated presenile dementia                             | 10                |
| E002z00   | Senile dementia with depressive or paranoid features NOS     | 10                |
| E002.00   | Senile dementia with depressive or paranoid features         | 10                |

| Read code | Description                                        | Number of studies |
|-----------|----------------------------------------------------|-------------------|
| E003.00   | Senile dementia with delirium                      | 10                |
| E00..11   | Senile dementia                                    | 10                |
| E001200   | Presenile dementia with paranoia                   | 10                |
| E001300   | Presenile dementia with depression                 | 10                |
| E001100   | Presenile dementia with delirium                   | 10                |
| E001z00   | Presenile dementia NOS                             | 10                |
| Eu02000   | [X]Dementia in Pick's disease                      | 9                 |
| Eu02200   | [X]Dementia in Huntington's disease                | 9                 |
| Eu02400   | [X]Dementia in human immunodef virus [HIV] disease | 8                 |
| Eu02100   | [X]Dementia in Creutzfeldt-Jakob disease           | 8                 |
| F112.00   | Senile degeneration of brain                       | 8                 |
| F116.00   | Lewy body disease                                  | 8                 |
| F111.00   | Pick's disease                                     | 7                 |
| E012.00   | Other alcoholic dementia                           | 6                 |
| E012.11   | Alcoholic dementia NOS                             | 6                 |
| Eu10711   | [X]Alcoholic dementia NOS                          | 5                 |
| E00z.00   | Senile or presenile psychoses NOS                  | 5                 |
| 6AB..00   | Dementia annual review                             | 5                 |
| Eu02z15   | [X] Senile psychosis NOS                           | 4                 |
| Eu02z12   | [X] Presenile psychosis NOS                        | 4                 |
| ZS7C500   | Language disorder of dementia                      | 4                 |
| E02y100   | Drug-induced dementia                              | 4                 |
| 66h..00   | Dementia monitoring                                | 4                 |
| R00z011   | [D]Memory deficit                                  | 3                 |
| e000.00   | Uncomplicated senile dementia                      | 3                 |
| Z7CEG00   | Transient memory loss                              | 3                 |
| Z7CF811   | Short-term memory loss                             | 3                 |
| E00..00   | Senile and presenile organic psychotic conditions  | 3                 |
| 2900      | SENILE DEMENTIA                                    | 3                 |
| Z7CF800   | Poor short-term memory                             | 3                 |
| Z7CEH15   | Poor memory                                        | 3                 |
| 2901A     | PRESENILE DEMENTIA                                 | 3                 |
| E00y.00   | Other senile and presenile organic psychoses       | 3                 |
| 3A30.00   | Memory: present place not knwn                     | 3                 |
| Z7CEH14   | Memory problem                                     | 3                 |
| 1B1A.12   | Memory loss symptom                                | 3                 |
| 1B1A.00   | Memory loss - amnesia                              | 3                 |
| Z7CE611   | Memory loss                                        | 3                 |
| Z7CEJ00   | Memory lapses                                      | 3                 |
| Z7CEH00   | Memory impairment                                  | 3                 |
| 1B1A.13   | Memory disturbance                                 | 3                 |
| Z7CEC11   | Loss of memory for recent events                   | 3                 |
| Z7CE615   | Loss of memory                                     | 3                 |
| 1461.00   | H/O: dementia                                      | 3                 |
| 3AE6.00   | GDS level 7 - very severe cognitive decline        | 3                 |
| 3AE5.00   | GDS level 6 - severe cognitive decline             | 3                 |
| 3AE4.00   | GDS level 5 - moderately severe cognitive decline  | 3                 |
| 3AE3.00   | GDS level 4 - moderate cognitive decline           | 3                 |
| 3AE2.00   | GDS level 3 - mild cognitive decline               | 3                 |
| 3AE1.00   | GDS level 2 - very mild cognitive decline          | 3                 |
| 2930      | DEMENTIA ARTERIOSCLEROTIC                          | 3                 |
| 299 G     | DEMENTIA AGGRESSIVE                                | 3                 |
| 299 B     | DEMENTIA                                           | 3                 |



1  
2  
3  
4  
5  
6  
7  
8  
9  
10  
11  
12  
13  
14  
15  
16  
17  
18  
19  
20  
21  
22  
23  
24  
25  
26  
27  
28  
29  
30  
31  
32  
33  
34  
35  
36  
37  
38  
39  
40  
41  
42  
43  
44  
45  
46  
47  
48  
49  
50  
51  
52  
53  
54  
55  
56  
57  
58  
59  
60

| Read code | Description                                 | Number of studies |
|-----------|---------------------------------------------|-------------------|
| E012000   | Chronic alcoholic brain syndrome            | 3                 |
| 1B1A.11   | Amnesia symptom                             | 3                 |
| ZR1K.00   | Alzheimer's disease assessment scale        | 3                 |
| 2901B     | ALZHEIMER'S DISEASE                         | 3                 |
| ZR1K.11   | ADAS - Alzheimer's disease assessment scale | 3                 |
| Eu80200   | [X]Receptive language disorder              | 2                 |
| R00z000   | [D]Amnesia (retrograde)                     | 2                 |
| ZS78D00   | Wernicke's dysphasia                        | 2                 |
| ZS78D13   | Wernicke's aphasia                          | 2                 |
| Z7C3500   | Unable to use verbal reasoning              | 2                 |
| Z7C3200   | Unable to reason                            | 2                 |
| Z7C5100   | Unable to concentrate                       | 2                 |
| 1B1A000   | Temporary loss of memory                    | 2                 |
| Z7CEF00   | Temporary loss of memory                    | 2                 |
| Z7C5313   | Short concentration span                    | 2                 |
| Z7C5312   | Short attention span                        | 2                 |
| 1BR0.11   | Short attention span                        | 2                 |
| 8HTY.00   | Referral to memory clinic                   | 2                 |
| 8H1a.00   | Referral to dementia care advisor           | 2                 |
| Z7C5300   | Reduced concentration span                  | 2                 |
| 1BR..00   | Reduced concentration                       | 2                 |
| Z7C5311   | Reduced attention span                      | 2                 |
| E00y.11   | Presbyophrenic psychosis                    | 2                 |
| Z7CEB12   | Poor memory for remote events               | 2                 |
| Z7CFO00   | Poor long-term memory                       | 2                 |
| 1BW..00   | Poor concentration                          | 2                 |
| Z7CEC12   | No memory for recent events                 | 2                 |
| Z7CEK00   | Minor memory lapses                         | 2                 |
| Z7CEL00   | Mild memory disturbance                     | 2                 |
| E2A1000   | Mild memory disturbance                     | 2                 |
| 3A40.00   | Memory: present year not known              | 2                 |
| 3A20.00   | Memory: present time not known              | 2                 |
| 3A10.00   | Memory: own age not known                   | 2                 |
| 3A50.00   | Memory: own DOB not known                   | 2                 |
| 3A70.00   | Memory: important event not kn              | 2                 |
| 3A80.00   | Memory: import.person not knwn              | 2                 |
| 3A91.00   | Memory: count down unsucc.                  | 2                 |
| 3AA1.00   | Memory: address recall unsucc.              | 2                 |
| Z7A1500   | Memory retraining                           | 2                 |
| Z7CE412   | Memory loss symptom                         | 2                 |
| Z7CE614   | Memory loss - amnesia                       | 2                 |
| Z7CE413   | Memory loss - amnesia                       | 2                 |
| Z7CE612   | Memory gone                                 | 2                 |
| Z7CEH11   | Memory dysfunction                          | 2                 |
| Z7CE400   | Memory disturbance (& amnesia (& symptom))  | 2                 |
| Z7CE414   | Memory disturbance                          | 2                 |
| Z7CEH12   | Memory deficit                              | 2                 |
| Z7CFx00   | Memory aided by use of labels               | 2                 |
| Z7CE415   | Loss of memory                              | 2                 |
| Z7CFO11   | Long-term memory loss                       | 2                 |
| Z7C5111   | Lack of concentration                       | 2                 |
| Z7CE616   | LOM - Loss of memory                        | 2                 |
| 2901D     | JACOB- CREUZFELDT DISEASE WITH DEMENTIA     | 2                 |

| Read code | Description                                                  | Number of studies |
|-----------|--------------------------------------------------------------|-------------------|
| Z7CEN11   | Invents experiences to compensate for loss of memory         | 2                 |
| Z7CEA11   | Impairment of working memory                                 | 2                 |
| Z7CEA13   | Impairment of primary memory                                 | 2                 |
| Z7C1.00   | Impaired cognition                                           | 2                 |
| 129B.00   | FH: Alzheimer's disease                                      | 2                 |
| Z7A1A00   | Executive functions training                                 | 2                 |
| 9hD0.00   | Excepted from dementia quality indicators: Patient unsuitabl | 2                 |
| 9hD1.00   | Excepted from dementia quality indicators: Informed dissent  | 2                 |
| 1S21.00   | Disturbance of memory for order of events                    | 2                 |
| Z7C3C00   | Difficulty using visuospatial reasoning                      | 2                 |
| Z7C3600   | Difficulty using verbal reasoning                            | 2                 |
| Z7C3300   | Difficulty reasoning                                         | 2                 |
| Z7C4A00   | Difficulty processing information at normal speed            | 2                 |
| Z7C4700   | Difficulty processing information accurately                 | 2                 |
| Z7C4300   | Difficulty processing information                            | 2                 |
| Z7C1100   | Difficulty making plans                                      | 2                 |
| ZR3V.13   | Dementia rating scale                                        | 2                 |
| 9Ou4.00   | Dementia monitoring verbal invite                            | 2                 |
| 9Ou3.00   | Dementia monitoring third letter                             | 2                 |
| 9Ou5.00   | Dementia monitoring telephone invite                         | 2                 |
| 9Ou2.00   | Dementia monitoring second letter                            | 2                 |
| 9Ou1.00   | Dementia monitoring first letter                             | 2                 |
| 3A...12   | Dementia assessment                                          | 2                 |
| Z7CGP00   | Delayed verbal memory                                        | 2                 |
| ZR3V.11   | DRS - Clinical dementia rating scale                         | 2                 |
| Y0601JS   | DEMENTIA CLINIC ATTENDANCE                                   | 2                 |
| Y060 JS   | DEMENTIA CLINIC                                              | 2                 |
| 2919      | DEMENTIA ALCOHOLIC                                           | 2                 |
| Z73..00   | Cognitive intervention strategies                            | 2                 |
| 28E..00   | Cognitive decline                                            | 2                 |
| ZR3V.00   | Clinical dementia rating scale                               | 2                 |
| ZR3V.12   | CDR - Clinical dementia rating scale                         | 2                 |
| Z7CEH13   | Bad memory                                                   | 2                 |
| ZR2X.12   | BDRS - Blessed dementia rating scale                         | 2                 |
| Z7A1400   | Attention training                                           | 2                 |
| Z7CE600   | Amnesia                                                      | 2                 |
| EU02y..0  |                                                              | 2                 |
| X0034     |                                                              | 2                 |
| AE..00    |                                                              | 2                 |
| Ryu5.00   | [X]Symptoms/signs inv cognit, percept, emotion state & behav | 1                 |
| Eu80000   | [X]Specific speech articulation disorder                     | 1                 |
| Eu81500   | [X]Severe learning disability                                | 1                 |
| Eu81700   | [X]Profound learning disability                              | 1                 |
| Ryu5000   | [X]Other amnesia                                             | 1                 |
| Ryu5100   | [X]Oth & unspec symptom/sign involv cognit funct/awareness   | 1                 |
| Eu81600   | [X]Mild learning disability                                  | 1                 |
| Eu05700   | [X]Mild cognitive disorder                                   | 1                 |
| Eu81z12   | [X]Learning disorder NOS                                     | 1                 |
| Eu81z11   | [X]Learning disability NOS                                   | 1                 |
| Eu81z13   | [X]Learn acquisition disab NOS                               | 1                 |
| Eu03.11   | [X]Korsakov's psychosis, nonalcoholic                        | 1                 |
| Eu10611   | [X]Korsakov's psychosis, alcohol induced                     | 1                 |
| Eu80014   | [X]Functional speech articulation disorder                   | 1                 |

1  
2  
3  
4  
5  
6  
7  
8  
9  
10  
11  
12  
13  
14  
15  
16  
17  
18  
19  
20  
21  
22  
23  
24  
25  
26  
27  
28  
29  
30  
31  
32  
33  
34  
35  
36  
37  
38  
39  
40  
41  
42  
43  
44  
45  
46  
47  
48  
49  
50  
51  
52  
53  
54  
55  
56  
57  
58  
59  
60

| Read code | Description                                         | Number of studies |
|-----------|-----------------------------------------------------|-------------------|
| Eu80100   | [X]Expressive language disorder                     | 1                 |
| Eu90000   | [X]Disturbance of activity and attention            | 1                 |
| Eu44000   | [X]Dissociative amnesia                             | 1                 |
| Ryu5700   | [X]Disorientation, unspecified                      | 1                 |
| Eu10712   | [X]Chronic alcoholic brain syndrome                 | 1                 |
| Eu80600   | [X]Auditory processing disorder                     | 1                 |
| Eu90011   | [X]Attention deficit hyperactivity disorder         | 1                 |
| Eu9y700   | [X]Attention deficit disorder                       | 1                 |
| ZS91.12   | [X]Attention deficit disorder                       | 1                 |
| Eu04.12   | [X]Acute / subacute confusional state, nonalcoholic | 1                 |
| ZV40000   | [V]Problems with learning                           | 1                 |
| R045100   | [D]Dysphasia                                        | 1                 |
| R00zX00   | [D]Disorientation, unspecified                      | 1                 |
| R043.00   | [D]Aphasia                                          | 1                 |
| R00z500   | [D]Anterograde amnesia                              | 1                 |
| E011200   | Wernicke-Korsakov syndrome                          | 1                 |
| C253.00   | Wernicke's encephalopathy                           | 1                 |
| C251.11   | Wernicke's encephalopathy                           | 1                 |
| Z7CMB00   | Visuospatial agnosia                                | 1                 |
| Z7A1800   | Visual processing training                          | 1                 |
| F481J00   | Visual disorientation syndrome                      | 1                 |
| F584000   | Unspecified other abnormal auditory perception      | 1                 |
| Z7CH300   | Unrealistic planning                                | 1                 |
| Z7C7200   | Unable to write                                     | 1                 |
| ZT46200   | Unable to use verbal communication                  | 1                 |
| ZT49200   | Unable to use non-verbal communication              | 1                 |
| ZT47200   | Unable to use language                              | 1                 |
| Z7CI500   | Unable to use decision-making strategies            | 1                 |
| Z7C6200   | Unable to tell the time                             | 1                 |
| ZT4f200   | Unable to responds to communication by others       | 1                 |
| Z7C2600   | Unable to recognise surroundings                    | 1                 |
| Z7C2200   | Unable to recognise sounds                          | 1                 |
| Z7C2D00   | Unable to recognise parts of own body               | 1                 |
| Z7C2L11   | Unable to recognise objects visually                | 1                 |
| Z7C2L00   | Unable to recognise objects by sight                | 1                 |
| Z7C2H00   | Unable to recognise objects                         | 1                 |
| Z7C2T00   | Unable to recognise familiar people                 | 1                 |
| Z7C2R00   | Unable to recognise faces by sight                  | 1                 |
| Z7C2P00   | Unable to recognise faces                           | 1                 |
| Z7CFC00   | Unable to recall five digit number at five minutes  | 1                 |
| Z7C8200   | Unable to read                                      | 1                 |
| Z7C4900   | Unable to process information at normal speed       | 1                 |
| Z7C4600   | Unable to process information accurately            | 1                 |
| Z7C4200   | Unable to process information                       | 1                 |
| ZM18200   | Unable to plan meals                                | 1                 |
| Z7CH200   | Unable to plan                                      | 1                 |
| ZN28200   | Unable to organise a journey                        | 1                 |
| Z7CI900   | Unable to make considered choices                   | 1                 |
| Z7C4C00   | Unable to analyse information                       | 1                 |
| 1B1S.00   | Transient global amnesia                            | 1                 |
| Z7CE700   | Transient global amnesia                            | 1                 |
| ZS78600   | Transcortical sensory dysphasia                     | 1                 |
| ZS78411   | Transcortical motor aphasia                         | 1                 |

| Read code | Description                                                 | Number of studies |
|-----------|-------------------------------------------------------------|-------------------|
| Z7CE711   | TGA - Transient global amnesia                              | 1                 |
| ZS78300   | Subcortical aphasia                                         | 1                 |
| E031.00   | Subacute confusional state                                  | 1                 |
| Z7A2200   | Strategy training for perceptual skills                     | 1                 |
| ZS5..00   | Speech and language dyspraxias                              | 1                 |
| ZS...00   | Speech and language disorder                                | 1                 |
| ZS73.00   | Specific language impairment                                | 1                 |
| ZS73.11   | Specific language disorder                                  | 1                 |
| Z7CC700   | Spatial disorientation                                      | 1                 |
| Z7CD400   | Slow learner                                                | 1                 |
| F483200   | Simultaneous visual perception without fusion               | 1                 |
| 1B1A100   | Short-term memory loss                                      | 1                 |
| 28E2.00   | Severe cognitive impairment                                 | 1                 |
| ZS78A00   | Semantic dysphasia                                          | 1                 |
| 9Nk1.00   | Seen in memory clinic                                       | 1                 |
| 9N0y.00   | Seen in learning disabilities clinic                        | 1                 |
| 342 CP    | SENILE PARKINSONISM                                         | 1                 |
| Z7CE900   | Retrograde amnesia                                          | 1                 |
| 8HHP.00   | Referral to learning disability team                        | 1                 |
| 8H4f.00   | Referral to learning disabilities psychiatrist              | 1                 |
| 1BR0.00   | Reduced concentration span                                  | 1                 |
| ZS72.00   | Receptive language impairment                               | 1                 |
| ZS78C00   | Receptive dysphasia                                         | 1                 |
| ZS78C11   | Receptive aphasia                                           | 1                 |
| Z7A1700   | Reality orientation                                         | 1                 |
| Z7A1711   | RO - Reality orientation                                    | 1                 |
| Z7CE911   | RA - Retrograde amnesia                                     | 1                 |
| ZRbf.00   | Psycholinguistic assessments of language process in aphasia | 1                 |
| ZD38300   | Promoting aphasics communication effectiveness programme    | 1                 |
| 8G96.00   | Problem solving therapy                                     | 1                 |
| ZS78F00   | Posterior dysphasia                                         | 1                 |
| 1B1Y.00   | Poor visual sequential memory                               | 1                 |
| 1B1a.00   | Poor auditory sequential memory                             | 1                 |
| F591z00   | Perceptive hearing loss NOS                                 | 1                 |
| F591.14   | Perceptive hearing loss                                     | 1                 |
| F591.13   | Perceptive deafness                                         | 1                 |
| Z7CL700   | Perception that things appear grey                          | 1                 |
| Z7CL800   | Perception that things appear flat                          | 1                 |
| Z7CLE00   | Perception of things changing size                          | 1                 |
| Z7CLH00   | Perception of things changing shape                         | 1                 |
| Z7CL911   | Perception of things changing colour                        | 1                 |
| E2F2.00   | Other specific learning difficulty                          | 1                 |
| F584z00   | Other abnormal auditory perception NOS                      | 1                 |
| F584.00   | Other abnormal auditory perception                          | 1                 |
| Z7A1600   | Orientation training                                        | 1                 |
| Z7CC312   | Orientation poor                                            | 1                 |
| Z7CC311   | Orientation confused                                        | 1                 |
| E2A1100   | Organic memory impairment                                   | 1                 |
| 918e.00   | On learning disability register                             | 1                 |
| 29J4.00   | O/E - sensory inattention                                   | 1                 |
| 2B46.11   | O/E - sensory dysphasia                                     | 1                 |
| 2B43.00   | O/E - sensory aphasia                                       | 1                 |
| 2BM3.11   | O/E - perceptive deafness                                   | 1                 |

1  
2  
3  
4  
5  
6  
7  
8  
9  
10  
11  
12  
13  
14  
15  
16  
17  
18  
19  
20  
21  
22  
23  
24  
25  
26  
27  
28  
29  
30  
31  
32  
33  
34  
35  
36  
37  
38  
39  
40  
41  
42  
43  
44  
45  
46  
47  
48  
49  
50  
51  
52  
53  
54  
55  
56  
57  
58  
59  
60

| Read code | Description                                                 | Number of studies |
|-----------|-------------------------------------------------------------|-------------------|
| 2B45.11   | O/E - motor dysphasia                                       | 1                 |
| 2B42.00   | O/E - motor aphasia                                         | 1                 |
| 2B46.00   | O/E - dysphasia - sensory                                   | 1                 |
| 2B45.00   | O/E - dysphasia - motor                                     | 1                 |
| 2B47.00   | O/E - dysphasia - NOS                                       | 1                 |
| 2B4..12   | O/E - dysphasia                                             | 1                 |
| 2B44.00   | O/E - aphasia NOS                                           | 1                 |
| 2B4..11   | O/E - aphasia                                               | 1                 |
| ZS78I00   | Non-fluent dysphasia                                        | 1                 |
| ZS78I11   | Non-fluent aphasia                                          | 1                 |
| 28E1.00   | Moderate cognitive impairment                               | 1                 |
| ZS78200   | Mixed transcortical dysphasia                               | 1                 |
| ZS78900   | Mixed dysphasia                                             | 1                 |
| ZS78911   | Mixed aphasia                                               | 1                 |
| Z7C2700   | Mistakes people's identity                                  | 1                 |
| 28E0.00   | Mild cognitive impairment                                   | 1                 |
| 3A60.00   | Memory: present month not knwn                              | 1                 |
| 3A11.00   | Memory: own age known                                       | 1                 |
| Z7A1300   | Memory skills training                                      | 1                 |
| Z7CFz00   | Memory aided by use of lists                                | 1                 |
| Z7CFw00   | Memory aided by use of diary                                | 1                 |
| ZS34.11   | Learning disability                                         | 1                 |
| 9HB2.00   | Learning disabilities health action plan reviewed           | 1                 |
| 9HB1.00   | Learning disabilities health action plan offered            | 1                 |
| 9HB0.00   | Learning disabilities health action plan declined           | 1                 |
| 9HB4.00   | Learning disabilities health action plan completed          | 1                 |
| 9HB6.11   | Learning disabilities annual health check declined          | 1                 |
| 9HB6.00   | Learning disabilities annual health assessment declined     | 1                 |
| 9HB5.00   | Learning disabilities annual health assessment              | 1                 |
| Z7CD200   | Learning difficulties                                       | 1                 |
| ZS3..00   | Language-related cognitive disorder                         | 1                 |
| ZS7..00   | Language impairment                                         | 1                 |
| ZS7C600   | Language disorder associated with thought disorder          | 1                 |
| 13ZA.00   | Language difficulty                                         | 1                 |
| E011100   | Korsakov's alcoholic psychosis with peripheral neuritis     | 1                 |
| E011000   | Korsakov's alcoholic psychosis                              | 1                 |
| E040.11   | Korsakoff's non-alcoholic psychosis                         | 1                 |
| ZS78D12   | Jargon dysphasia                                            | 1                 |
| ZS78D11   | Jargon aphasia                                              | 1                 |
| A411.00   | Jakob-Creutzfeldt disease                                   | 1                 |
| ZS78212   | Isolation dysphasia                                         | 1                 |
| Z7CEA12   | Impairment of immediate recall                              | 1                 |
| Z7CD300   | Impaired ability to learn new material                      | 1                 |
| E201700   | Hysterical amnesia                                          | 1                 |
| Z7CL100   | Heightened visual perception                                | 1                 |
| Z7CL511   | Heightened perception of touch                              | 1                 |
| Z7CLO00   | Heightened perception of taste                              | 1                 |
| Z7CLP11   | Heightened perception of sound                              | 1                 |
| Z7CLN11   | Heightened perception of smells                             | 1                 |
| Z7CLN12   | Heightened perception of odours                             | 1                 |
| Z7CLN00   | Heightened olfactory perception                             | 1                 |
| Z7CLP00   | Heightened auditory perception                              | 1                 |
| ZRLfE00   | Health of the Nation Outcome Scale item 4 - cognitive probl | 1                 |

| Read code | Description                                                  | Number of studies |
|-----------|--------------------------------------------------------------|-------------------|
| Z7CF200   | Has delayed recall                                           | 1                 |
| ZS78800   | Global dysphasia                                             | 1                 |
| 3AE..00   | Global deterioration scale: assessment of prim deg dementia  | 1                 |
| ZS78811   | Global aphasia                                               | 1                 |
| Z7CE500   | Forgetful                                                    | 1                 |
| ZS78E11   | Fluent aphasia                                               | 1                 |
| 1281.00   | FH: Senile dementia                                          | 1                 |
| ZS71.00   | Expressive language impairment                               | 1                 |
| ZS84.00   | Expressive language disorder                                 | 1                 |
| ZS78G11   | Expressive aphasia                                           | 1                 |
| 9hD..00   | Exception reporting: dementia quality indicators             | 1                 |
| ZS78K00   | Efferent motor dysphasia                                     | 1                 |
| ZS78K11   | Efferent motor aphasia                                       | 1                 |
| ZS78.00   | Dysphasia                                                    | 1                 |
| ZT46400   | Does not use verbal communication                            | 1                 |
| ZT4J400   | Does not use the elements of language                        | 1                 |
| ZT49400   | Does not use non-verbal communication                        | 1                 |
| ZT4f400   | Does not respond to communication by others                  | 1                 |
| Z7C2900   | Does not recognise self                                      | 1                 |
| Z7C2A00   | Does not recognise photographs of self                       | 1                 |
| Z7CEM00   | Distortion of memory                                         | 1                 |
| Z7CC600   | Disorientation for person                                    | 1                 |
| Z7C7300   | Difficulty writing                                           | 1                 |
| ZT46500   | Difficulty using verbal communication                        | 1                 |
| ZT49500   | Difficulty using non-verbal communication                    | 1                 |
| Z7CI600   | Difficulty using decision-making strategies                  | 1                 |
| ZT4A500   | Difficulty using a non-speech system for communication       | 1                 |
| Z7CJ100   | Difficulty solving problems                                  | 1                 |
| Z7C8300   | Difficulty reading                                           | 1                 |
| ZM18500   | Difficulty planning meals                                    | 1                 |
| Z7C9300   | Difficulty performing logical sequencing                     | 1                 |
| ZN28500   | Difficulty organising a journey                              | 1                 |
| Z7CI200   | Difficulty making decisions                                  | 1                 |
| Z7CIA00   | Difficulty making considered choices                         | 1                 |
| ZT4g500   | Difficulty imitating forms of communication                  | 1                 |
| Z7C4D00   | Difficulty analysing information                             | 1                 |
| 9HB7.11   | Did not attend learning disabilities annual health check     | 1                 |
| 9HB7.00   | Did not attend learning disabilities annual health assessmnt | 1                 |
| 9Ou..00   | Dementia monitoring administration                           | 1                 |
| ZS93.11   | DAMP - Deficits in attention motor control and perception    | 1                 |
| ZS78B11   | Conduction aphasia                                           | 1                 |
| F591y00   | Combined perceptive hearing loss                             | 1                 |
| Z7A1.00   | Cognitive skills training                                    | 1                 |
| ZD15.00   | Cognitive neuropsychological language therapy                | 1                 |
| ZD38200   | Cognitive behavioural language therapy                       | 1                 |
| E2E0z00   | Child attention deficit disorder NOS                         | 1                 |
| E2E0.00   | Child attention deficit disorder                             | 1                 |
| Z7CLK00   | Changed perception of time                                   | 1                 |
| F11x700   | Cerebral degeneration due to Jakob - Creutzfeldt disease     | 1                 |
| ZS78H00   | Broca's dysphasia                                            | 1                 |
| ZS78H11   | Broca's aphasia                                              | 1                 |
| ZS76.00   | Auditory processing disorder                                 | 1                 |
| E2E0000   | Attention deficit without hyperactivity                      | 1                 |

1  
2  
3  
4  
5  
6  
7  
8  
9  
10  
11  
12  
13  
14  
15  
16  
17  
18  
19  
20  
21  
22  
23  
24  
25  
26  
27  
28  
29  
30  
31  
32  
33  
34  
35  
36  
37  
38  
39  
40  
41  
42  
43  
44  
45  
46  
47  
48  
49  
50  
51  
52  
53  
54  
55  
56  
57  
58  
59  
60

| Read code | Description                                | Number of studies |
|-----------|--------------------------------------------|-------------------|
| ZS91.00   | Attention deficit disorder                 | 1                 |
| ZS78.11   | Aphasia                                    | 1                 |
| Z7CE811   | Antegrade amnesia                          | 1                 |
| ZS78511   | Anomic aphasia                             | 1                 |
| ZS78500   | Anomia                                     | 1                 |
| Z7CEB00   | Amnesia for remote events                  | 1                 |
| Z7CEC00   | Amnesia for recent events                  | 1                 |
| Z7CEE00   | Amnesia for important personal information | 1                 |
| Z7CED00   | Amnesia for day to day facts               | 1                 |
| 13Y7.00   | Alzheimer's disease society member         | 1                 |
| ZS7C.00   | Acquired language disorder                 | 1                 |
| ZS78100   | Acquired dysphasias                        | 1                 |
| 9OIA.00   | ADHD monitoring invitation third letter    | 1                 |
| 9OI8.00   | ADHD monitoring invitation first letter    | 1                 |
| ZS91.11   | ADD - Attention deficit disorder           | 1                 |
| Z7C2N00   |                                            | 1                 |
| E0120     |                                            | 1                 |
| 6AB.00    |                                            | 1                 |
| Z7C3800   |                                            | 1                 |
| Xa25J     |                                            | 1                 |
| Z7CEB11   |                                            | 1                 |
| Z7CC800   |                                            | 1                 |
| Z7C2J00   |                                            | 1                 |
| X00Rk     |                                            | 1                 |
| Z7C3B00   |                                            | 1                 |
| Z7A1100   |                                            | 1                 |
| Z7C6300   |                                            | 1                 |
| Z7C9200   |                                            | 1                 |
| Z7C3900   |                                            | 1                 |
| Z7C2F00   |                                            | 1                 |
| Z7C2B00   |                                            | 1                 |
| Z7A1712   |                                            | 1                 |
| Z7A2100   |                                            | 1                 |
| Z7A2300   |                                            | 1                 |

**Table 5. List of Read codes used in the studies of fatigue.**

| Read code | Description                                               | Number of studies |
|-----------|-----------------------------------------------------------|-------------------|
| 168..00   | Tiredness symptom                                         | 3                 |
| 168..11   | Fatigue - symptom                                         | 3                 |
| 168..12   | Lethargy - symptom                                        | 3                 |
| 1682.00   | Fatigue                                                   | 3                 |
| 1683.00   | Tired all the time                                        | 3                 |
| 1684.11   | C/O - debility - malaise                                  | 3                 |
| 168Z.00   | Tiredness symptom NOS                                     | 3                 |
| 8HkW.00   | Referral to chronic fatigue syndrome specialist team      | 3                 |
| 8HIL.00   | Referral for chronic fatigue syndrome activity management | 3                 |
| 8Q1..00   | Activity management for chronic fatigue syndrome          | 3                 |
| E205.00   | Neurasthenia - nervous debility                           | 3                 |
| E205.12   | Tired all the time                                        | 3                 |
| Eu46011   | [X]Fatigue syndrome                                       | 3                 |
| F286.00   | Chronic fatigue syndrome                                  | 3                 |
| F286.11   | CFS - Chronic fatigue syndrome                            | 3                 |
| F286.12   | Postviral fatigue syndrome                                | 3                 |
| F286.13   | PVFS - Postviral fatigue syn                              | 3                 |
| F286.14   | Post-viral fatigue syndrome                               | 3                 |
| F286.15   | Myalgic encephalomyelitis                                 | 3                 |
| F286.16   | ME - Myalgic encephalomyelitis                            | 3                 |
| F286000   | Mild chronic fatigue syndrome                             | 3                 |
| F286100   | Moderate chronic fatigue syndrome                         | 3                 |
| F286200   | Severe chronic fatigue syndrome                           | 3                 |
| R007.00   | [D]Malaise and fatigue                                    | 3                 |
| R007100   | [D]Fatigue                                                | 3                 |
| R007211   | [D]General weakness                                       | 3                 |
| R007300   | [D]Lethargy                                               | 3                 |
| R007400   | [D]Postviral (asthenic) syndrome                          | 3                 |
| R007411   | [D]Post viral debility                                    | 3                 |
| R007500   | [D]Tiredness                                              | 3                 |
| R007z00   | [D]Malaise and fatigue NOS                                | 3                 |
| 168..13   | Malaise - symptom                                         | 2                 |
| 1683.11   | C/O - 'tired all the time'                                | 2                 |
| 1684.00   | Malaise/lethargy                                          | 2                 |
| 1684.13   | C/O - postviral syndrome                                  | 2                 |
| 1688.00   | Exhaustion                                                | 2                 |
| 1B3..12   | Weakness symptoms                                         | 2                 |
| E205.11   | Nervous exhaustion                                        | 2                 |
| Eu46000   | [X]Neurasthenia                                           | 2                 |
| F03y.12   | Myalgic encephalomyelitis                                 | 2                 |
| N239.00   | Fibromyalgia                                              | 2                 |
| N248.00   | Fibromyalgia                                              | 2                 |
| R007000   | [D]Malaise                                                | 2                 |
| R007200   | [D]Asthenia NOS                                           | 2                 |
| R2y3.00   | [D]Debility, unspecified                                  | 2                 |
| 168..14   | C/O 'Muzzy head'                                          | 1                 |
| 1B32.00   | Weakness present                                          | 1                 |
| 8HkW.11   | Referral to myalgic encephalomyelitis specialist team     | 1                 |
| 8Q1..11   | Activity management for myalgic encephalopathy            | 1                 |
| A4zy300   | Encephalitis lethargica                                   | 1                 |
| Eu46y14   | [X]Psychasthenia                                          | 1                 |



| Read code | Description                | Number of studies |
|-----------|----------------------------|-------------------|
| Eu46y15   | [X]Psychasthenia neurosis  | 1                 |
| R007600   | [D]Post polio exhaustion   | 1                 |
| R007z11   | [D]Lassitude               | 1                 |
| R202.00   | [D]Senile asthenia         | 1                 |
| SN44.00   | Exhaustion due to exposure | 1                 |

For peer review only

**Table 6. List of Read codes used in the studies of pain.**

| Read code | Description                    | Number of studies |
|-----------|--------------------------------|-------------------|
| NyuAG     | [X]Uns sof tis d,use/overu/prs | 2                 |
| NyuA      | [X]Other soft tissue disorders | 2                 |
| Nyu80     | [X]Other myositis              | 2                 |
| Nyu3      | [X]Other joint disorders       | 2                 |
| Ryu70     | [X]Other chronic pain          | 2                 |
| NyuAF     | [X]Oth spcf soft tissu disords | 2                 |
| Nyu85     | [X]Oth spcf disorders/muscle   | 2                 |
| NyuAA     | [X]Oth sft tis diso/oth dis CE | 2                 |
| Nyu8A     | [X]Oth disorders/muscle/dis CE | 2                 |
| Nyu9      | [X]Disorders/synovium+tendon   | 2                 |
| Nyu8      | [X]Disorders of muscles        | 2                 |
| Nyu8B     | [X]Disorder of muscle, unspec  | 2                 |
| R01zz     | [D]Nerv/musculoskel.sympt.NOS  | 2                 |
| R01z      | [D]Nerv/musculoskel.symp.other | 2                 |
| R01       | [D]Musculoskeletal symptoms    | 2                 |
| R01z2     | [D]Musculoskeletal pain        | 2                 |
| R00z2     | [D]General aches and pains     | 2                 |
| N22z      | Synovium/tendon/bursa dis.NOS  | 2                 |
| N0950     | Stiff joint NEC-site unspecif. | 2                 |
| N0958     | Stiff joint NEC-other specif.  | 2                 |
| N240      | Rheumatism/fibrositis NOS      | 2                 |
| N2        | Rheumatism, excl.the back      | 2                 |
| N240z     | Rheumatism or fibrositis NOS   | 2                 |
| N2400     | Rheumatism NOS - shoulder      | 2                 |
| N2403     | Rheumatic pain                 | 2                 |
| N24z      | Polyalgia                      | 2                 |
| N09       | Other/unspecif.joint disorders | 2                 |
| N22yz     | Other tendon disorder NOS      | 2                 |
| N233z     | Other specif.musc.disorder NOS | 2                 |
| N06yz     | Other specif.arthropathy NOS   | 2                 |
| N06y9     | Other spec.arthr.-multipl.site | 2                 |
| N09y      | Other spec. joint disorders    | 2                 |
| N24       | Other soft tissue disorders    | 2                 |
| N3z       | Other musculoskeletal dis. NOS | 2                 |
| N247      | Other musculoskel.limb sympts. | 2                 |
| N23y      | Other muscle/ligament/fascia   | 2                 |
| N23yz     | Other musc./lig./fasc.dis.NOS  | 2                 |
| N096z     | Other joint symptoms NOS       | 2                 |
| N0968     | Other joint sympt.-other spec. | 2                 |
| N0969     | Other joint sympt.-multip.site | 2                 |
| N09yz     | Other joint disorders NOS      | 2                 |
| N09y0     | Other joint dis.-site unspec.  | 2                 |
| N09y8     | Other joint dis.-other specif. | 2                 |
| N09y9     | Other joint dis.-multiple site | 2                 |
| N2y       | Nonarticular rheumatism OS     | 2                 |
| N2z       | Nonarticular rheumatism NOS    | 2                 |
| N39       | Nonallopathic lesions, NEC     | 2                 |
| N39z      | Nonallopathic lesion NEC NOS   | 2                 |
| N2411     | Myositis unspecified           | 2                 |
| N2480     | Myofascial pain syndrome       | 2                 |
| N241      | Myalgia/myositis unspecified   | 2                 |

1  
2  
3  
4  
5  
6  
7  
8  
9  
10  
11  
12  
13  
14  
15  
16  
17  
18  
19  
20  
21  
22  
23  
24  
25  
26  
27  
28  
29  
30  
31  
32  
33  
34  
35  
36  
37  
38  
39  
40  
41  
42  
43  
44  
45  
46  
47  
48  
49  
50  
51  
52  
53  
54  
55  
56  
57  
58  
59  
60

| Read code | Description                     | Number of studies |
|-----------|---------------------------------|-------------------|
| N241z     | Myalgia/myositis NOS            | 2                 |
| N3y       | Musculoskeletal disorders OS    | 2                 |
| Ny        | Musculoskeletal diseases OS     | 2                 |
| Nz        | Musculoskeletal diseases NOS    | 2                 |
| N2402     | Muscular rheumatism             | 2                 |
| N23z      | Muscle/ligament/fascia dis.NOS  | 2                 |
| N2410     | Muscle pain                     | 2                 |
| N0959     | Multiple joint stiffness        | 2                 |
| N0450     | Juv ankylosing spondylitis      | 2                 |
| N095z     | Joint stiffness NEC NOS         | 2                 |
| N095      | Joint stiffness NEC             | 2                 |
| N09zz     | Joint disorders NOS             | 2                 |
| N09z      | Joint disorder NOS              | 2                 |
| N09z0     | Joint disord.NOS-site unspecif  | 2                 |
| N09z8     | Joint disord.NOS-other specif.  | 2                 |
| N09z9     | Joint disord.NOS-multiple site  | 2                 |
| N096      | Joint crepitus                  | 2                 |
| N2401     | Fibrositis unspecified          | 2                 |
| N2412     | Fibromyositis NOS               | 2                 |
| N248      | Fibromyalgia                    | 2                 |
| N239      | Fibromyalgia                    | 2                 |
| N23       | Fascia disorders                | 2                 |
| N06zB     | Chronic arthritis               | 2                 |
| N06z0     | Arthropathy NOS-site unspecif.  | 2                 |
| N06z8     | Arthropathy NOS-other specif.   | 2                 |
| N06z9     | Arthropathy NOS-multiple sites  | 2                 |
| N06zz     | Arthropathy NOS                 | 2                 |
| N0z       | Arthropathies NOS               | 2                 |
| N06z      | Arthritis                       | 2                 |
| N0949     | Arthralgia of multiple joints   | 2                 |
| N094z     | Arthralgia NOS                  | 2                 |
| N0940     | Arthralgia - site unspecified   | 2                 |
| N0948     | Arthralgia - other specified    | 2                 |
| N094      | Ache in joint                   | 2                 |
| OX7179KB  | viral myalgia /ox               | 1                 |
| 7K6T1     | release of Torticollis          | 1                 |
| N2452     | neuropathic pain                | 1                 |
| OX7289CH  | back pain /ox                   | 1                 |
| Syu4E     | [X]Unspecif inj should/up arm   | 1                 |
| NyuB8     | [X]Unsp osteopor + pathol frac  | 1                 |
| Nyu28     | [X]Unilat second gonarthrosis   | 1                 |
| Nyu25     | [X]Unilat primary gonarthrosis  | 1                 |
| Nyu4      | [X]Systemc connctv tis disordrs | 1                 |
| Nyu4C     | [X]Sys diso/connctv t/o dis CE  | 1                 |
| Nyu95     | [X]Synovitis+tenosyn/bact d CE  | 1                 |
| Nyu97     | [X]Synovial hypertrophy, NEC    | 1                 |
| Ryu3      | [X]Sym/sign inv nv/muscskel sy  | 1                 |
| Syu12     | [X]Superf inj neck part unsp    | 1                 |
| Syu84     | [X]Sprn/str oth unsp part knee  | 1                 |
| Syu46     | [X]Spr/str oth/un part shl gir  | 1                 |
| Syu36     | [X]Spr/str ot/un pt lum sp/pel  | 1                 |
| Syu18     | [X]Spr/str jt/lg ot/un pt neck  | 1                 |
| Nyu92     | [X]Spontans ruptr/oth tendons   | 1                 |

| Read code | Description                    | Number of studies |
|-----------|--------------------------------|-------------------|
| Nyu68     | [X]Spondylpthy/oth diseases CE | 1                 |
| Nyu66     | [X]Spondylpth/o inf+paras d CE | 1                 |
| Nyu69     | [X]Spondylopathy unspecified   | 1                 |
| Nyu6      | [X]Spondylopathies             | 1                 |
| Nyu5B     | [X]Spin osteochondrosis, unsp  | 1                 |
| Nyu1G     | [X]Seroposit rheum arthr, unsp | 1                 |
| Nyu10     | [X]Rheum arthrit+inv/o org/sys | 1                 |
| Nyu05     | [X]Reactv arthropathy/o dis CE | 1                 |
| Eu45y     | [X]Psychogenic torticollis     | 1                 |
| NyuE4     | [X]Postproc muscsk disord,unsp | 1                 |
| Nyu2F     | [X]Post-traum arthr oth joints | 1                 |
| NyuC9     | [X]Periostitis/oth inf dis CE  | 1                 |
| Nyu51     | [X]Other+unspecified kyphosis  | 1                 |
| Nyu64     | [X]Other spondylosis           | 1                 |
| Nyu2D     | [X]Other specified arthrosis   | 1                 |
| Nyu1B     | [X]Other specified arthritis   | 1                 |
| Nyu65     | [X]Other spcfd spondylopathies | 1                 |
| Nyu3D     | [X]Other spcfd joint disorders | 1                 |
| NyuAB     | [X]Other shoulder lesions      | 1                 |
| Nyu54     | [X]Other secondary scoliosis   | 1                 |
| Nyu50     | [X]Other secondary kyphosis    | 1                 |
| Nyu17     | [X]Other secondary gout        | 1                 |
| Nyu21     | [X]Other primary coxarthrosis  | 1                 |
| Nyu20     | [X]Other polyarthrosis         | 1                 |
| Nyu46     | [X]Other overlap syndromes     | 1                 |
| NyuB1     | [X]Other osteoporosis          | 1                 |
| NyuC      | [X]Other osteopathies          | 1                 |
| NyuC5     | [X]Other osteonecrosis         | 1                 |
| NyuC3     | [X]Other osteomyelitis         | 1                 |
| Nyu82     | [X]Other ossification/muscle   | 1                 |
| Nyu37     | [X]Other meniscus derangements | 1                 |
| Nyu52     | [X]Other lordosis              | 1                 |
| Nyu15     | [X]Other juvenile arthritis    | 1                 |
| Nyu3C     | [X]Other instability of joint  | 1                 |
| NyuA4     | [X]Other infective bursitis    | 1                 |
| Nyu53     | [X]Other idiopathic scoliosis  | 1                 |
| Nyu41     | [X]Other giant cell arteritis  | 1                 |
| Nyu56     | [X]Other fusion of spine       | 1                 |
| Nyu55     | [X]Other forms of scoliosis    | 1                 |
| NyuAE     | [X]Other enthesopathies,NEC    | 1                 |
| Nyu7      | [X]Other dorsopathies          | 1                 |
| Nyu7A     | [X]Other dorsalgia             | 1                 |
| Nyu36     | [X]Other disorders of patella  | 1                 |
| Nyu44     | [X]Other dermatomyositis       | 1                 |
| Nyu35     | [X]Other derangements/patella  | 1                 |
| NyuB6     | [X]Other cyst of bone          | 1                 |
| NyuC2     | [X]Other chronic osteomyelitis | 1                 |
| Nyu18     | [X]Other chondrocalcinosis     | 1                 |
| Nyu81     | [X]Other calcification/muscle  | 1                 |
| NyuA1     | [X]Other bursitis of knee      | 1                 |
| NyuA6     | [X]Other bursitis NEC          | 1                 |
| NyuA5     | [X]Other bursal cyst           | 1                 |
| NyuA7     | [X]Other bursa disorder        | 1                 |

1  
2  
3  
4  
5  
6  
7  
8  
9  
10  
11  
12  
13  
14  
15  
16  
17  
18  
19  
20  
21  
22  
23  
24  
25  
26  
27  
28  
29  
30  
31  
32  
33  
34  
35  
36  
37  
38  
39  
40  
41  
42  
43  
44  
45  
46  
47  
48  
49  
50  
51  
52  
53  
54  
55  
56  
57  
58  
59  
60

| Read code | Description                    | Number of studies |
|-----------|--------------------------------|-------------------|
| NyuE3     | [X]Other biomechanical lesions | 1                 |
| NyuB4     | [X]Other adult osteomalacia    | 1                 |
| NyuC0     | [X]Other acute osteomyelitis   | 1                 |
| NyuC4     | [X]Other 2ndary osteonecrosis  | 1                 |
| Nyu47     | [X]Oth syst dis/connctv tissue | 1                 |
| Nyu91     | [X]Oth synovitis+tenosynovitis | 1                 |
| Syu40     | [X]Oth sup inj should/upp arm  | 1                 |
| Nyu62     | [X]Oth spondylosis+myelopathy  | 1                 |
| Nyu79     | [X]Oth specified dorsopathies  | 1                 |
| NyuC8     | [X]Oth spcfd disorders of bone | 1                 |
| Nyu1A     | [X]Oth spcfc arthropathies,NEC | 1                 |
| Nyu12     | [X]Oth spcf rheumatd arthritis | 1                 |
| Nyu61     | [X]Oth spcf inflam spondylpath | 1                 |
| NyuD4     | [X]Oth spcf disordrs/cartilage | 1                 |
| Nyu59     | [X]Oth spcf deform dorsopath   | 1                 |
| NyuD3     | [X]Oth spc osteochondropathies | 1                 |
| Syu3K     | [X]Oth sp inj abd/low back/pel | 1                 |
| Nyu2E     | [X]Oth secondary coxarthrosis  | 1                 |
| Nyu83     | [X]Oth ruptr/muscl(nontraumtc) | 1                 |
| Nyu58     | [X]Oth recur vertebrl subluxtn | 1                 |
| Nyu03     | [X]Oth reactive arthropathies  | 1                 |
| Nyu13     | [X]Oth psoriatic arthropathies | 1                 |
| Nyu26     | [X]Oth post-traum gonarthrosis | 1                 |
| Nyu23     | [X]Oth post-traum coxarthrosis | 1                 |
| NyuB0     | [X]Oth osteoporosis+patholog # | 1                 |
| Nyu39     | [X]Oth intrnl derangemnts/knee | 1                 |
| Nyu90     | [X]Oth infectve(teno)synovitis | 1                 |
| Nyu60     | [X]Oth infectv spondylopathies | 1                 |
| Nyu45     | [X]Oth forms/systemc sclerosis | 1                 |
| Nyu43     | [X]Oth forms/sys lup erythemat | 1                 |
| NyuA9     | [X]Oth fibroblastic disorders  | 1                 |
| Nyu22     | [X]Oth dysplastic coxarthrosis | 1                 |
| NyuB5     | [X]Oth diso/continuity of bone | 1                 |
| NyuC6     | [X]Oth diso/bone dvlpmnt+grwth | 1                 |
| NyuE      | [X]Oth dis musculnsk+connect   | 1                 |
| Nyu70     | [X]Oth cervicl disc displacmnt | 1                 |
| Nyu71     | [X]Oth cervicl disc degeneratn | 1                 |
| Nyu72     | [X]Oth cervical disc disorders | 1                 |
| Nyu3A     | [X]Oth articlur cartilag disor | 1                 |
| Nyu27     | [X]Oth 2ndry gonarthrsis,bilat | 1                 |
| Nyu24     | [X]Oth 2ndry coxarthrsis,bilat | 1                 |
| NyuB2     | [X]Osteoporosis/oth disords CE | 1                 |
| NyuBC     | [X]Osteopenia                  | 1                 |
| NyuCA     | [X]Osteopathy/other inf dis CE | 1                 |
| NyuCF     | [X]Osteopathy/oth diseases CE  | 1                 |
| NyuCC     | [X]Osteonecrosis/other dis CE  | 1                 |
| NyuCB     | [X]Osteonecros/h'moglobnph CE  | 1                 |
| NyuCD     | [X]Osteitis defrmn/neop dis CE | 1                 |
| SR1z1     | [X]Op multiple fractures unsp  | 1                 |
| Nyu00     | [X]O strep arthritis+polyarthr | 1                 |
| Nyu38     | [X]O spontn disrptn/lig(s)knee | 1                 |
| Nyu63     | [X]O spondylosis+radiculopathy | 1                 |
| NyuD2     | [X]O spf juvnl osteochondrosis | 1                 |

| Read code | Description                        | Number of studies |
|-----------|------------------------------------|-------------------|
| Nyu42     | [X]O spcf necrotiz vasculopath     | 1                 |
| Nyu3B     | [X]O spcf joint derangmnts,NEC     | 1                 |
| Nyu77     | [X]O spcf intrvrtbrl disc diso     | 1                 |
| Nyu94     | [X]O spcf diso/synovium+tendon     | 1                 |
| Nyu19     | [X]O spcf crystl arthropathies     | 1                 |
| Nyu76     | [X]O spc intrvrtbrl disc degenr    | 1                 |
| Nyu75     | [X]O spc intervert disc displm     | 1                 |
| NyuB7     | [X]O spc diso/bne dnsity+struc     | 1                 |
| NyuE0     | [X]O spc acq defrm/muscskl sys     | 1                 |
| NyuA3     | [X]O sft t d rl/use,overu+prss     | 1                 |
| Nyu11     | [X]O sero+ve rheumat arthritis     | 1                 |
| Nyu57     | [X]O recur atlantoaxl subluxtn     | 1                 |
| NyuE2     | [X]O postproced muscskel disor     | 1                 |
| Nyu04     | [X]O postinf arthropath/dis CE     | 1                 |
| NyuC7     | [X]O hypertrophc osteoarhrpth      | 1                 |
| Nyu14     | [X]O enteropathic arthrpathies     | 1                 |
| NyuB3     | [X]O drug-indc osteomalac/adlt     | 1                 |
| Nyu96     | [X]O diso/synovm+tendon/dis CE     | 1                 |
| Nyu93     | [X]O contractre/tendon(sheath)     | 1                 |
| Nyu40     | [X]O cond relt/polyarterit nod     | 1                 |
| NyuC1     | [X]O chr h'matogens osteomyelit    | 1                 |
| Nyu4D     | [X]Necrotis vasculopathy, unsp     | 1                 |
| Nyu87     | [X]Myosits/protzl+paras inf CE     | 1                 |
| Nyu88     | [X]Myositis/oth infects dis CE     | 1                 |
| Nyu89     | [X]Myositis in sarcoidosis CE      | 1                 |
| Nyu86     | [X]Myositi/bacterial dis CE        | 1                 |
| Nyu84     | [X]Muscle wasting and atrophy NEC  | 1                 |
| SyuA4     | [X]Multi disloc/spr/strns,unsp     | 1                 |
| Nyu4F     | [X]Mixed connective tissue disease | 1                 |
| Nyu74     | [X]Lumb+o intvt disc d+radiclp     | 1                 |
| Nyu73     | [X]Lumb+o intrvrt disc d+mylop     | 1                 |
| Nyu5A     | [X]Lordosis, unspecified           | 1                 |
| Nyu16     | [X]Juvenile arthritis/o dis CE     | 1                 |
| Syu1      | [X]Injuries to the neck            | 1                 |
| Syu3      | [X]Injabd/low back/lum sp/pel      | 1                 |
| Syu4      | [X]Inj to shoulder/upper arm       | 1                 |
| Syu8      | [X]Inj to knee and lower leg       | 1                 |
| Nyu1      | [X]Inflammatory polyarthropathies  | 1                 |
| Nyu0      | [X]Infectious arthropathies        | 1                 |
| Nyu1C     | [X]Gt arthpth/enz d+o inh d CE     | 1                 |
| Syu16     | [X]Fracture other parts neck       | 1                 |
| Syu44     | [X]Fract should/upp arm unsp       | 1                 |
| Syu15     | [X]Fract oth spec cervic vert      | 1                 |
| SyuA2     | [X]Fract inv oth comb bod regn     | 1                 |
| NyuAH     | [X]Fibroblastic disord, unspec     | 1                 |
| NyuA8     | [X]Fasciitis,NEC                   | 1                 |
| NyuBB     | [X]Erosion of bone                 | 1                 |
| SyuA3     | [X]Dsl/spr/str,oth comb bod rg     | 1                 |
| SyuB3     | [X]Dsl/sp/st un jt/l leg,lv un     | 1                 |
| NyuB      | [X]Disordrs/bone dens+structur     | 1                 |
| Nyu3E     | [X]Disorder of patella, unspec     | 1                 |
| NyuDE     | [X]Disorder cartilage, unspec      | 1                 |
| NyuBA     | [X]Disord bone dens/struc,unsp     | 1                 |

1  
2  
3  
4  
5  
6  
7  
8  
9  
10  
11  
12  
13  
14  
15  
16  
17  
18  
19  
20  
21  
22  
23  
24  
25  
26  
27  
28  
29  
30  
31  
32  
33  
34  
35  
36  
37  
38  
39  
40  
41  
42  
43  
44  
45  
46  
47  
48  
49  
50  
51  
52  
53  
54  
55  
56  
57  
58  
59  
60

| Read code              | Description                         | Number of studies |
|------------------------|-------------------------------------|-------------------|
| Syu17                  | [X]Disloc oth unsp parts neck       | 1                 |
| SyuBC                  | [X]Disl/spr/str unsp body reg       | 1                 |
| Nyu4E                  | [X]Dermatopolymyositis, unsp        | 1                 |
| Nyu48                  | [X]Dermat(poly)myosit/neo d CE      | 1                 |
| Nyu5                   | [X]Deforming dorsopathies           | 1                 |
| Nyu1D                  | [X]Crys arthpht/o meta diso,CE      | 1                 |
| Nyu67                  | [X]Collapsd vertebra in dis CE      | 1                 |
| SR1z0                  | [X]Clsd multiple fracts unsp        | 1                 |
| NyuD                   | [X]Chondropathies                   | 1                 |
| Nyu7B                  | [X]Cervical disc disord, unsp       | 1                 |
| Nyu4B                  | [X]Arthrpthy/hyprsens react CE      | 1                 |
| Nyu1F                  | [X]Arthrpth/o spcf diseases CE      | 1                 |
| Nyu1E                  | [X]Arthrpth/o en,nut+meta diso      | 1                 |
| Nyu2                   | [X]Arthrosis                        | 1                 |
| Nyu4A                  | [X]Arthropathy/o bld disord CE      | 1                 |
| Nyu49                  | [X]Arthropathy/neoplast dis CE      | 1                 |
| Nyu02                  | [X]Arthrits/o inf+paras dis CE      | 1                 |
| Nyu01                  | [X]Arthrit+polyarth/o s bact a      | 1                 |
| NyuB9                  | [X]Adult osteomalacia, unsp         | 1                 |
| Nyu                    | [X]Ad muscskl+con t dis cls tm      | 1                 |
| NyuCE                  | [X]#bone/neoplastic disease CE      | 1                 |
| NyuE1                  | [X]#/bne f insrt/o i,j pr,bn p      | 1                 |
| EMISREQ 7N945(9)       | [SO]Lumbosacral joint -Req.         | 1                 |
| HNGZ018                | [RFC] Arthritis                     | 1                 |
| R0420                  | [D]Swelling in head or neck         | 1                 |
| R042                   | [D]Swell.masslump head/neck         | 1                 |
| R027                   | [D]Spontaneous bruising             | 1                 |
| R065A                  | [D]Musculoskeletal chest pain       | 1                 |
| R137                   | [D]Musculoskel.ray/scan abnorm      | 1                 |
| R137z                  | [D]Musculosc xray/scan abn NOS      | 1                 |
| R022C                  | [D]Lump on knee                     | 1                 |
| R04zz                  | [D]Head and neck symptoms NOS       | 1                 |
| R04                    | [D]Head and neck symptoms           | 1                 |
| R04z                   | [D]Head and neck other sympt.       | 1                 |
| R00z2-1                | [D]General aches and pains          | 1                 |
| R065000                | [D]CHEST PAIN, UNSPECIFIED          | 1                 |
| R065z00                | [D]CHEST PAIN NOS                   | 1                 |
| R065.00                | [D]CHEST PAIN                       | 1                 |
| R090z00                | [D]Abdominal pain                   | 1                 |
| R090.00                | [D]Abdominal pain                   | 1                 |
| DEGRADE_EVENT_1730_49  | [DEGRADE Muscle Injury]             | 1                 |
| DEGRADE_EVENT_2469_340 | [DEGRADE Knee Pain]                 | 1                 |
| DEGRADE_EVENT_3154_40  | [DEGRADE Knee Pain]                 | 1                 |
| N135z-2                | Wry neck                            | 1                 |
| N05z3                  | Wrist osteoarthritis NOS            | 1                 |
| N0943-1                | Wrist joint pain                    | 1                 |
| N06z3-1                | Wrist arthritis NOS                 | 1                 |
| S5704                  | Whiplash injury                     | 1                 |
| EGTONWE2               | Wedge Compression # Of Dorsal Spine | 1                 |
| EGTONWE1               | Wedge Compression # Lumbar Spine    | 1                 |
| N2432                  | Weber - Christian disease           | 1                 |
| N2430                  | Weber - Christian disease           | 1                 |
| N0974                  | Walking difficulty-other spec.      | 1                 |

| Read code | Description                                | Number of studies |
|-----------|--------------------------------------------|-------------------|
| N0975     | Walking difficulty-multip.site             | 1                 |
| N0970     | Walking difficulty due to unspecified site | 1                 |
| N2413     | Viral myalgia                              | 1                 |
| N092M     | Villonodular synovitis of knee             | 1                 |
| N092z     | Villonodular synovitis NOS                 | 1                 |
| N092      | Villonodular synovitis                     | 1                 |
| N0920     | Villonod.synovitis-site unspec             | 1                 |
| N0921     | Villonod.synovitis-shoulder                | 1                 |
| N0928     | Villonod.synovitis-other spec.             | 1                 |
| N0929     | Villonod.synovitis-mult.sites              | 1                 |
| N2208     | Villonod synovitis-tend sheath             | 1                 |
| N092B     | Villonod synovitis-sternclav j             | 1                 |
| N092A     | Villonod synovitis-shoulder                | 1                 |
| N092C     | Villonod synovitis-acromclav j             | 1                 |
| N330B     | Vertebral osteoporosis                     | 1                 |
| N320      | Vertebral epiphysitis                      | 1                 |
| N1        | Vertebral column syndromes                 | 1                 |
| N1y       | Vertebral column disorders OS              | 1                 |
| N1z       | Vertebral column disorder NOS              | 1                 |
| N0966-2   | Unstable knee                              | 1                 |
| N0967-1   | Unstable ankle                             | 1                 |
| N066z     | Unspecified monoarthritis NOS              | 1                 |
| N066      | Unspecified monoarthritis                  | 1                 |
| N1290     | Unspec.disc disorder+myelop.               | 1                 |
| N0650     | Unsp.polyarthr.-site unspecif.             | 1                 |
| N065000   | Unsp.polyarthr.-site unspecif.             | 1                 |
| N0651     | Unsp.polyarthr.-shoulder                   | 1                 |
| N065800   | Unsp.polyarthr.-other specif.              | 1                 |
| N0658     | Unsp.polyarthr.-other specif.              | 1                 |
| N065900   | Unsp.polyarthr.-multiple site              | 1                 |
| N0659     | Unsp.polyarthr.-multiple site              | 1                 |
| N3020     | Unsp.osteomyelitis-site unspec             | 1                 |
| N3021     | Unsp.osteomyelitis-shoulder                | 1                 |
| N3028     | Unsp.osteomyelitis-other spec.             | 1                 |
| N3029     | Unsp.osteomyelitis-mult.site               | 1                 |
| N302z     | Unsp.osteomyelitis NOS                     | 1                 |
| N0660     | Unsp.monoarthr.-site unspecif.             | 1                 |
| N0661     | Unsp.monoarthr.-shoulder                   | 1                 |
| N0668     | Unsp.monoarthr.-other specif.              | 1                 |
| N1121     | Two lev th spondyl-no myelop               | 1                 |
| N11B1     | Two lev th spondyl + radiculop             | 1                 |
| N1131     | Two lev th spondyl + myelop                | 1                 |
| N1141     | Two lev lumbsac spond-no myelo             | 1                 |
| N1151     | Two lev lumbsac spond + myelop             | 1                 |
| N1101     | Two lev Cx spondyl-no myelop               | 1                 |
| N1191     | Two lev Cx spondyl + radiculop             | 1                 |
| N1111     | Two lev Cx spondyl + myelop                | 1                 |
| N018      | Tuberculous arthritis                      | 1                 |
| N3041     | Tuberculosis of thoracic spine             | 1                 |
| N304      | Tuberculosis of spine                      | 1                 |
| N306      | Tuberculosis of other bones                | 1                 |
| N3042     | Tuberculosis of lumbar spine               | 1                 |
| N3040     | Tuberculosis of cervical spine             | 1                 |



1  
2  
3  
4  
5  
6  
7  
8  
9  
10  
11  
12  
13  
14  
15  
16  
17  
18  
19  
20  
21  
22  
23  
24  
25  
26  
27  
28  
29  
30  
31  
32  
33  
34  
35  
36  
37  
38  
39  
40  
41  
42  
43  
44  
45  
46  
47  
48  
49  
50  
51  
52  
53  
54  
55  
56  
57  
58  
59  
60

| Read code | Description                     | Number of studies |
|-----------|---------------------------------|-------------------|
| N3060     | Tuberculosis bone-site unspec.  | 1                 |
| N3061     | Tuberculosis bone-shoulder      | 1                 |
| N3064     | Tuberculosis bone-other sites   | 1                 |
| N3065     | Tuberculosis bone-multip.sites  | 1                 |
| N306z     | Tuberculosis bone NOS           | 1                 |
| N22yD     | Tuberc infec - tendon sheath    | 1                 |
| N2155     | Trochanteric tendinitis         | 1                 |
| N2157     | Trochanteric bursitis           | 1                 |
| N0874     | Triangular fibrocartilage tear  | 1                 |
| N0875     | Triangular fibrocartil detach   | 1                 |
| N118      | Traumatic spondylopathy         | 1                 |
| N2312     | Traumatic myositis ossificans   | 1                 |
| SE46      | Traumatic haematoma             | 1                 |
| SK        | Traumatic complicat./unsp.inj.  | 1                 |
| N061A     | Traumatic arthropathy-shoulder  | 1                 |
| N061M     | Traumatic arthropathy-knee      | 1                 |
| N061z     | Traumatic arthropathy NOS       | 1                 |
| N061      | Traumatic arthropathy           | 1                 |
| N0610     | Traumatic arthr.-site unspecif  | 1                 |
| N0611     | Traumatic arthr.-shoulder       | 1                 |
| N0618     | Traumatic arthr.-other specif.  | 1                 |
| N0619     | Traumatic arthr.-multiple site  | 1                 |
| N061B     | Traumat arthrop-sternoclav jt   | 1                 |
| N061C     | Traumat arthrop-acromioclav jt  | 1                 |
| S906      | Traumat amp at shoulder joint   | 1                 |
| SA72      | Traum.unil.amput.>knee-no comp  | 1                 |
| N220Q     | Transient synovitis             | 1                 |
| N064A     | Transient arthropathy-shoulder  | 1                 |
| N064M     | Transient arthropathy-knee      | 1                 |
| N064z     | Transient arthropathy NOS       | 1                 |
| N064      | Transient arthropathy           | 1                 |
| N064B     | Transient arthrop-sternoclav j  | 1                 |
| N0640     | Transient arthr.-site unspecif  | 1                 |
| N0641     | Transient arthr.-shoulder       | 1                 |
| N0648     | Transient arthr.-other specif.  | 1                 |
| N0649     | Transient arthr.-multiple site  | 1                 |
| N064C     | Transient arthr-acromioclav jt  | 1                 |
| N135      | Torticollis unspecified         | 1                 |
| Q20y9     | Torticollis due to birth injury | 1                 |
| 16A3      | Torticollis - symptom           | 1                 |
| N2451-1   | Toe pain                        | 1                 |
| N2162     | Tibial collateral lig.bursitis  | 1                 |
| N2450-1   | Thumb pain                      | 1                 |
| N05z4-2   | Thumb osteoarthritis NOS        | 1                 |
| N3735     | Thoracogenic scoliosis          | 1                 |
| N1485     | Thoraco-lumbar ankylosis        | 1                 |
| N144      | Thoracic/lumbosacral neuritis   | 1                 |
| N144z     | Thoracic/lumbosac.neuritis NOS  | 1                 |
| N112-1    | Thoracic spondylosis            | 1                 |
| N112      | Thoracic spond.-no myelopathy   | 1                 |
| N113      | Thoracic spond.+ myelopathy     | 1                 |
| N148B     | Thoracic spine instability      | 1                 |
| N1484     | Thoracic spine ankylosis        | 1                 |

| Read code  | Description                        | Number of studies |
|------------|------------------------------------|-------------------|
| N1401      | Thoracic spinal stenosis           | 1                 |
| N12A2      | Thoracic postlaminectomy syndr     | 1                 |
| N1440      | Thoracic nerve root pain           | 1                 |
| N12z8      | Thoracic discitis                  | 1                 |
| N121       | Thoracic disc displ.-no myelop     | 1                 |
| N1292      | Thoracic disc disord.+myelop.      | 1                 |
| N126       | Thoracic disc degeneration         | 1                 |
| S571       | Thoracic back sprain               | 1                 |
| EMISNQTH14 | Thoracic back pain                 | 1                 |
| N245-8     | Thigh pain                         | 1                 |
| N11B       | Th spondyl + radiculop             | 1                 |
| N1406      | Th spin stenosis due to oth dis    | 1                 |
| N12C1      | Th disc prolapse+radiculopathy     | 1                 |
| N12B1      | Th disc prolapse + myelopathy      | 1                 |
| N2132-1    | Tennis elbow                       | 1                 |
| N2202      | Tendon sheath giant cell tumor     | 1                 |
| ASDFGTE2   | Tendon Symptoms                    | 1                 |
| N2456      | Tender heel pad                    | 1                 |
| S46B       | Tear/articular cart/knee,currnt    | 1                 |
| S545       | Tear of ligament of knee joint     | 1                 |
| N000*      | Systemic lupus erythematosus       | 1                 |
| N000       | Systemic lupus erythematosus       | 1                 |
| N000z      | Systemic lupus erythematos.NOS     | 1                 |
| N0012      | Syst scleros induc drugs/chems     | 1                 |
| N0003      | Syst lup eryth + organ/sys inv     | 1                 |
| N2227      | Syphilitic bursitis                | 1                 |
| N2200      | Synovitis or tenosynovitis NOS     | 1                 |
| N220z-2    | Synovitis of knee                  | 1                 |
| N220z      | Synovitis of knee                  | 1                 |
| N220V      | Synovitis of knee                  | 1                 |
| N220       | Synovitis and tenosynovitis        | 1                 |
| N220T      | Synovitis NOS                      | 1                 |
| N2201      | Synovit./tenosynovitis+dis EC      | 1                 |
| N22y4      | Synovial plica                     | 1                 |
| N098       | Synovial osteochondromatosis       | 1                 |
| N2240      | Synovial cyst unspecified          | 1                 |
| N0980      | Synov osteochondromat-shoulder     | 1                 |
| N098B      | Synov osteochondromat-knee         | 1                 |
| N0981      | Synov osteochondromat st-cla j     | 1                 |
| N0982      | Synov osteochondromat ac-cla j     | 1                 |
| 1D24       | Symptom: trunk posterior           | 1                 |
| 16J4       | Swollen knee                       | 1                 |
| 16J3       | Swollen joint                      | 1                 |
| 16J7       | Swollen foot                       | 1                 |
| 1834-1     | Swollen finger                     | 1                 |
| 1JG        | Suspected inflammatory arthritis   | 1                 |
| N21z2      | Supraspinatus tendonitis           | 1                 |
| N2113      | Supraspinatus tendinitis           | 1                 |
| N230       | Suppurative myositis               | 1                 |
| SD1y4      | Supl inj bk NOS-no mj opn wnd      | 1                 |
| SD9        | Superficialinjuriesunspecif.       | 1                 |
| SD097      | SuperficialInjury:Neck             | 1                 |
| SD2y1      | Superficial injury of scapular NOS | 1                 |

1  
2  
3  
4  
5  
6  
7  
8  
9  
10  
11  
12  
13  
14  
15  
16  
17  
18  
19  
20  
21  
22  
23  
24  
25  
26  
27  
28  
29  
30  
31  
32  
33  
34  
35  
36  
37  
38  
39  
40  
41  
42  
43  
44  
45  
46  
47  
48  
49  
50  
51  
52  
53  
54  
55  
56  
57  
58  
59  
60

| Read code | Description                       | Number of studies |
|-----------|-----------------------------------|-------------------|
| SD6y2     | Superficial injury of knee NOS    | 1                 |
| SDz       | Superficial injuries NOS          | 1                 |
| SD0       | Superficial Injury: Neck          | 1                 |
| SD2y0     | Superfic injury shoulder NOS      | 1                 |
| SD2       | Superf.inj.shoulder/upper arm     | 1                 |
| SD1z4     | Superf.back inj.NOS+infect.       | 1                 |
| N3371     | Sudek's atrophy                   | 1                 |
| N2167     | Subpatellar bursitis              | 1                 |
| N3y01     | Subluxatn complex (vertebral)     | 1                 |
| N3y02     | Sublux stenosis of neural canal   | 1                 |
| N3081     | Subacute osteomyelitis-th spin    | 1                 |
| N3082     | Subacute osteomyelitis-lu spin    | 1                 |
| N3080     | Subacute osteomyelitis-Cx spin    | 1                 |
| N309      | Subacute osteomyelitis            | 1                 |
| N308      | Subacute osteomyelitis            | 1                 |
| N2122     | Subacromial impingement           | 1                 |
| N2116     | Subacromial bursitis              | 1                 |
| S3z2      | Stress fracture                   | 1                 |
| N095B     | Stiff sternoclavic joint NEC      | 1                 |
| N095A     | Stiff shoulder NEC                | 1                 |
| 16AZ      | Stiff neck symptom NOS            | 1                 |
| 16A       | Stiff neck symptom                | 1                 |
| N135z     | Stiff neck NOS                    | 1                 |
| 16A2      | Stiff neck                        | 1                 |
| N095M     | Stiff knee NEC                    | 1                 |
| N095C     | Stiff acromioclavicular joint NEC | 1                 |
| S5y41     | Sternoclavicular sprain           | 1                 |
| N0108     | Staphylococc arthrit/polyarthr    | 1                 |
| S5410     | Sprn,knee jt,medial collat        | 1                 |
| S5400     | Sprn,knee jt,lat collat lgmt      | 1                 |
| S520D     | Sprn triangular fibrocartilage    | 1                 |
| S520G     | Sprn shrt intrnsc lgmnt non-sp    | 1                 |
| S5        | Sprains and strains               | 1                 |
| S50       | Sprained shoulder                 | 1                 |
| S54y-99   | Sprained knee NOS                 | 1                 |
| S54-99    | Sprained knee                     | 1                 |
| S560      | Sprain, lumbosacral ligament      | 1                 |
| S564      | Sprain, iliolumbar ligament       | 1                 |
| S501      | Sprain, coraco-clav ligament      | 1                 |
| S506      | Sprain supraspinatus tendon       | 1                 |
| S505      | Sprain subscapularis tendon       | 1                 |
| S5071     | Sprain shoulder joint posterior   | 1                 |
| S5070     | Sprain shoulder joint anterior    | 1                 |
| S507      | Sprain shoulder joint             | 1                 |
| S534      | Sprain patellar tendon            | 1                 |
| S503      | Sprain infraspinatus tendon       | 1                 |
| S500      | Sprain acromio-clav ligament      | 1                 |
| S542      | Sprain -cruciate knee ligament    | 1                 |
| S541      | Sprain - medial knee ligament     | 1                 |
| S541-99   | Sprain - medial knee ligament     | 1                 |
| S540-99   | Sprain - lateral knee ligament    | 1                 |
| S540      | Sprain - lateral knee ligament    | 1                 |
| SC07      | Sprain - late effect              | 1                 |

| Read code | Description                    | Number of studies |
|-----------|--------------------------------|-------------------|
| S57X      | Spr/str ot/un pt lum sp/pel    | 1                 |
| ASDFGSP5  | Sports Injury                  | 1                 |
| N082      | Spontaneous joint dislocation  | 1                 |
| 16B3      | Spontaneous bruising           | 1                 |
| N11z0     | Spondylosis-no myelopathy,NOS  | 1                 |
| N11zz     | Spondylosis NOS                | 1                 |
| N11z1     | Spondylosis + myelopathy, NOS  | 1                 |
| N388      | Spondylolysis                  | 1                 |
| OXL7561C  | Spondylolisthesis /ox          | 1                 |
| N10z      | Spondylitis NOS                | 1                 |
| N374      | Spine curvature+other condits. | 1                 |
| N374z     | Spine curvature+other cond.NOS | 1                 |
| N1400     | Spinal stenosis unspec.region  | 1                 |
| N140z     | Spinal stenosis NOS            | 1                 |
| N140-1    | Spinal stenosis                | 1                 |
| N140      | Spinal stenosis                | 1                 |
| N101      | Spinal enthesopathy            | 1                 |
| N222z     | Specific bursitides NOS        | 1                 |
| N222      | Specific bursitides            | 1                 |
| F1382     | Spasmodic Torticollis          | 1                 |
| N23y4     | Spasm of muscle                | 1                 |
| N23yE     | Spasm of back muscles          | 1                 |
| EGTON309  | Sore Neck                      | 1                 |
| N3321     | Solitary bone cyst             | 1                 |
| N0878     | Snapping shoulder              | 1                 |
| N32y      | Slipped radial epiphysis       | 1                 |
| N33zA     | Skeletal fluorosis             | 1                 |
| N002*     | Sicca (Sjogren's) syndrome     | 1                 |
| N2125     | Shoulder tendonitis            | 1                 |
| S50y      | Shoulder sprain NOS            | 1                 |
| N245-7    | Shoulder pain                  | 1                 |
| N245      | Shoulder pain                  | 1                 |
| N2457     | Shoulder pain                  | 1                 |
| N0951     | Shoulder joint stiffness       | 1                 |
| UNMAPPC0  | Shoulder injury                | 1                 |
| S221      | Shoulder fracture - open       | 1                 |
| N22y5     | Short tendon                   | 1                 |
| N011      | Sex acquired reactive arthrop  | 1                 |
| N0110     | Sex acqd reac arthrop-unspec   | 1                 |
| N0111     | Sex acqd reac arthrop-shoulder | 1                 |
| N011y     | Sex acqd reac arthrop-oth spec | 1                 |
| N011x     | Sex acqd reac arthrop-multiple | 1                 |
| N011z     | Sex acq reac arthropathy NOS   | 1                 |
| SRz0      | Severe multiple injuries       | 1                 |
| N047      | Seropositive erosive RA        | 1                 |
| N04X      | Seroposit rheum arthr unsp     | 1                 |
| N040P     | Seronegative rheumat arthritis | 1                 |
| EGTONSE2  | Sero-Negative Polyarthritis    | 1                 |
| N04y1     | Sero negative arthritis        | 1                 |
| N04y10    | Sero negative arthritis        | 1                 |
| N3301     | Senile osteoporosis            | 1                 |
| N2169     | Semimembranosus tendinitis     | 1                 |
| EGTON131  | Semi Frozen Shoulder           | 1                 |

1  
2  
3  
4  
5  
6  
7  
8  
9  
10  
11  
12  
13  
14  
15  
16  
17  
18  
19  
20  
21  
22  
23  
24  
25  
26  
27  
28  
29  
30  
31  
32  
33  
34  
35  
36  
37  
38  
39  
40  
41  
42  
43  
44  
45  
46  
47  
48  
49  
50  
51  
52  
53  
54  
55  
56  
57  
58  
59  
60

| Read code  | Description                    | Number of studies |
|------------|--------------------------------|-------------------|
| N3y00      | Segmental & somatic dysfunctn  | 1                 |
| N0505      | Secondary multiple arthrosis   | 1                 |
| N050500    | Secondary multiple arthrosis   | 1                 |
| EMISNQSC20 | Scoliosis of thoracic spine    | 1                 |
| N374A      | Scoliosis in skelet dysplasia  | 1                 |
| N374C      | Scoliosis in neurofibromatosis | 1                 |
| N374D      | Scoliosis in conn tiss anomal  | 1                 |
| N3739      | Scoliosis due to oth treatment | 1                 |
| OX735AA    | Scoliosis Acquired /ox         | 1                 |
| N3743      | Scoliosis + other condition    | 1                 |
| N001       | Scleroderma                    | 1                 |
| OX353C     | Sciatica Chronic /ox           | 1                 |
| N1240      | Schmorl's nodes-unspec. region | 1                 |
| N1241      | Schmorl's nodes-thoracic regn. | 1                 |
| N124z      | Schmorl's nodes-region NOS     | 1                 |
| N1242      | Schmorl's nodes-lumbar region  | 1                 |
| N124       | Schmorl's nodes                | 1                 |
| N3201      | Scheuermann's disease          | 1                 |
| N2121      | Scapulohumeral fibrositis      | 1                 |
| N146z-1    | Sacroiliac strain              | 1                 |
| N1466      | Sacroiliac disorder            | 1                 |
| S5731      | Sacral/coccyx sprain           | 1                 |
| N0004      | SLE with pericarditis          | 1                 |
| N25        | SAPHO syndrome                 | 1                 |
| S5Q2       | Rupture supraspinatus tendon   | 1                 |
| S5Q1       | Rupture subscapularis tendon   | 1                 |
| S5U2       | Rupture patellar tendon        | 1                 |
| N2250      | Rupture of synovium unspecif.  | 1                 |
| N225z      | Rupture of synovium NOS        | 1                 |
| N2251-99   | Rupture of synovium - knee     | 1                 |
| N225       | Rupture of synovium            | 1                 |
| S5Q0       | Rupture infraspinal tendon     | 1                 |
| N2251      | Ruptur poplit space synov cyst | 1                 |
| N2110      | Rotator cuff syndrome unspecif | 1                 |
| S504       | Rotator cuff sprain            | 1                 |
| N211       | Rotator cuff shoulder syndrome | 1                 |
| N2261      | Rotator cuff complete rupture  | 1                 |
| N3385      | Rotational mal-union of #      | 1                 |
| 182B       | Rib pain                       | 1                 |
| EGTON425   | Rheumatology                   | 1                 |
| N040N      | Rheumatoid vasculitis          | 1                 |
| N0422      | Rheumatoid nodule              | 1                 |
| N040R      | Rheumatoid nodule              | 1                 |
| N0421      | Rheumatoid lung disease        | 1                 |
| N040Q      | Rheumatoid bursitis            | 1                 |
| N0402      | Rheumatoid arthritis-shoulder  | 1                 |
| N0400      | Rheumatoid arthritis-Cx spine  | 1                 |
| N040D      | Rheumatoid arthritis of knee   | 1                 |
| N040       | Rheumatoid arthritis           | 1                 |
| N0403      | Rheumatoid arthr-sternoclav jt | 1                 |
| N0404      | Rheumatoid arthr-acromioclav j | 1                 |
| N1351      | Rheumatic torticollis          | 1                 |
| N0420      | Rheumatic carditis             | 1                 |

| Read code | Description                      | Number of studies |
|-----------|----------------------------------|-------------------|
| OX7149A   | Rheumatic Arthritis /ox          | 1                 |
| N040S     | Rheumat arthr - multiple joint   | 1                 |
| N2333     | Rhabdomyolysis                   | 1                 |
| N042z     | Rh.arthr.+visc/syst.dis.NOS      | 1                 |
| N080A     | Reverse Hill-Sachs lesion        | 1                 |
| N0871     | Reverse Bankart lesion           | 1                 |
| N12zA     | Resorption of thoracic disc      | 1                 |
| N12zE     | Resorption of lumbar disc        | 1                 |
| N12z6     | Resorption of cervical disc      | 1                 |
| N3732     | Resolving infant.idiopath.scol   | 1                 |
| N246      | Residual soft tiss.foreign bod   | 1                 |
| N339      | Residual foreign body in bone    | 1                 |
| Ny2       | Repetitive strain injury         | 1                 |
| N33z5     | Relapsing polychondritis         | 1                 |
| N337      | Reflex sympathetic dystrophy     | 1                 |
| N083      | Redislocation of joint           | 1                 |
| S46D      | Recurrent subluxation of patella | 1                 |
| N083D     | Recurrent sublux shoulder-post   | 1                 |
| N083F     | Recurrent sublux shoulder-inf    | 1                 |
| N083C     | Recurrent sublux shoulder-ant    | 1                 |
| N083H     | Recurrent sublux shoulder-ant    | 1                 |
| N083q     | Recurrent sublux - patella       | 1                 |
| N083z     | Recurrent joint dislocat.NOS     | 1                 |
| N0839     | Recurrent disloc-multip joints   | 1                 |
| N083B     | Recurrent disloc shoulder-post   | 1                 |
| N083E     | Recurrent disloc shoulder-inf    | 1                 |
| N083A     | Recurrent disloc shoulder-ant    | 1                 |
| N083G     | Recurrent disloc shoulder-ant    | 1                 |
| N083p     | Recurrent disloc - patella       | 1                 |
| N083n     | Recurrent disloc - knee          | 1                 |
| N0830     | Recurr.joint disloc.-site unsp   | 1                 |
| N0838     | Recurr.joint disloc-other spec   | 1                 |
| N0831     | Recur. disloc.- shoulder joint   | 1                 |
| N0836-99  | Recur. disloc. - knee joint      | 1                 |
| N083K     | Recur sublux shoulder-multidir   | 1                 |
| N083J     | Recur disloc shoulder-multidir   | 1                 |
| N1y0      | Rec atlantoax subl + myelopath   | 1                 |
| N01w0     | Reactive arthropathy-shoulder    | 1                 |
| N01w      | Reactive arthropathy unspecified | 1                 |
| N01wB     | Reactive arthropathy of knee     | 1                 |
| N038      | Reactive arthropathies           | 1                 |
| N01w2     | Reactive arthrop-sternoclav jt   | 1                 |
| N01w1     | Reactive arthr-acromioclav jt    | 1                 |
| EGTON436  | Radiculopathy                    | 1                 |
| N2422     | Radiculitis unspecified          | 1                 |
| N3734     | Radiation scoliosis              | 1                 |
| N3711     | Radiation kyphosis               | 1                 |
| N0706     | Radial tear of medial meniscus   | 1                 |
| N0717     | Radial tear of lateral meniscus  | 1                 |
| N2204     | Radial styloid tenosynovitis     | 1                 |
| N22yC     | Pyogenic infec - tendon sheath   | 1                 |
| N010      | Pyogenic arthritis               | 1                 |
| N0100     | Pyogenic arthr.-site unspecif.   | 1                 |

1  
2  
3  
4  
5  
6  
7  
8  
9  
10  
11  
12  
13  
14  
15  
16  
17  
18  
19  
20  
21  
22  
23  
24  
25  
26  
27  
28  
29  
30  
31  
32  
33  
34  
35  
36  
37  
38  
39  
40  
41  
42  
43  
44  
45  
46  
47  
48  
49  
50  
51  
52  
53  
54  
55  
56  
57  
58  
59  
60

| Read code | Description                                                         | Number of studies |
|-----------|---------------------------------------------------------------------|-------------------|
| N0101     | Pyogenic arthr.-shoulder regn.                                      | 1                 |
| N010y     | Pyogenic arthr.-other specif.                                       | 1                 |
| N010x     | Pyogenic arthr.-multiple sites                                      | 1                 |
| N010z     | Pyogenic arthr.-NOS                                                 | 1                 |
| S57z0     | Pulled back muscle                                                  | 1                 |
| OX848ML   | Pulled Muscle /ox                                                   | 1                 |
| E2601     | Psychogenic Torticollis                                             | 1                 |
| N2373     | Pseudosarcomatous fibromatosis                                      | 1                 |
| N33zC     | Pseudarth after fusn/arthrodes                                      | 1                 |
| S5422     | Prt tr,knee,post cruciate lgmt                                      | 1                 |
| N12C4     | Prol lumb interv disc sciatic                                       | 1                 |
| N0010     | Progressive systemic sclerosis                                      | 1                 |
| N2311     | Progressive myositis ossific.                                       | 1                 |
| N3733     | Progressive infant.idiop.scol.                                      | 1                 |
| N051B     | Primary gonarthrosis, bilat                                         | 1                 |
| N050400   | Primary general osteoarthritis                                      | 1                 |
| N0504     | Primary general osteoarthritis                                      | 1                 |
| N0519     | Primary coxarthrosis bilateral                                      | 1                 |
| N051C     | Primary arthrosis of first carpometacarpal joints, bilateral        | 1                 |
| N2165     | Prepatellar bursitis                                                | 1                 |
| N3736     | Postural scoliosis                                                  | 1                 |
| N3307     | Postsurg malabsorp osteoporos                                       | 1                 |
| N3314     | Postsur malab osteop+path frct                                      | 1                 |
| NyX       | Postproc muscscsk disord,unsp                                       | 1                 |
| N2313     | Postop.heterotopic calcificat.                                      | 1                 |
| N3306     | Postoophorectomy osteoporosis                                       | 1                 |
| N3312     | Postoophorc osteopor+path frct                                      | 1                 |
| N3302     | Postmenopausal osteoporosis                                         | 1                 |
| N331B     | Postmenop osteopor+path fract                                       | 1                 |
| N0380     | Postmeningococcal arthritis                                         | 1                 |
| N12Az     | Postlaminectomy syndrome NOS                                        | 1                 |
| N12A      | Postlaminectomy syndrome                                            | 1                 |
| N12A0     | Postlaminectomy syndr.unspec.                                       | 1                 |
| N0381     | Postinf arthropath in syphilis                                      | 1                 |
| N037      | Postimmunization arthropathy                                        | 1                 |
| N013      | Postdysenteric react arthrop                                        | 1                 |
| N0130     | Postdys react arthrop-unspec                                        | 1                 |
| N0131     | Postdys react arthrop-shoulder                                      | 1                 |
| N013y     | Postdys react arthrop-oth spec                                      | 1                 |
| N013x     | Postdys react arthrop-multiple                                      | 1                 |
| N013z     | Postdys react arthrop NOS                                           | 1                 |
| 16B4      | Post-traumatic bruising                                             | 1                 |
| N052B     | Post-traumatic arthrosis of first carpometacarpal joints, bilateral | 1                 |
| N052C     | Post-trauma gonarth, unilat                                         | 1                 |
| N052A     | Post-traum gonarthrosis, bilat                                      | 1                 |
| N0529     | Post-traum coxarthrosis, bilat                                      | 1                 |
| N3738     | Post-surgical scoliosis                                             | 1                 |
| N3721     | Post-laminectomy lordosis                                           | 1                 |
| N3712     | Post-laminectomy kyphosis                                           | 1                 |
| N2314     | Polymyositis ossificans                                             | 1                 |
| N004      | Polymyositis                                                        | 1                 |

| Read code | Description                    | Number of studies |
|-----------|--------------------------------|-------------------|
| N20*      | Polymyalgia rheumatica         | 1                 |
| N20       | Polymyalgia                    | 1                 |
| N065-1    | Polyarthropathy NEC            | 1                 |
| N065.11   | Polyarthropathy NEC            | 1                 |
| N065      | Polyarthropathy NEC            | 1                 |
| N065z     | Polyarthritis                  | 1                 |
| N065z00   | Polyarthritis                  | 1                 |
| N307z     | Poliomyelitis osteopathy NOS   | 1                 |
| N3070     | Polio.osteopathy-site unspecif | 1                 |
| N3071     | Polio.osteopathy-shoulder      | 1                 |
| N3078     | Polio.osteopathy-other sites   | 1                 |
| N3079     | Polio.osteopathy-multiple site | 1                 |
| N0109     | Pneumococc arthrit & polyarthr | 1                 |
| N2179     | Plantar fasciitis              | 1                 |
| N2209     | Plant thorn synovitis          | 1                 |
| N2161     | Pes anserinus tendin./bursitis | 1                 |
| SJz-98    | Peripheral nerve injury NOS    | 1                 |
| N21zz     | Peripheral enthesopathy NOS    | 1                 |
| N21       | Peripheral enthesopathies      | 1                 |
| N0705     | Periph detach-medial meniscus  | 1                 |
| N0716     | Periph detach-lateral meniscus | 1                 |
| N303      | Periostitis, no osteomyelitis  | 1                 |
| N303B     | Periostitis, no osteomye-th sp | 1                 |
| N303C     | Periostitis, no osteomye-lu sp | 1                 |
| N303A     | Periostitis, no osteomye-Cx sp | 1                 |
| N303z     | Periostitis no osteomyel NOS   | 1                 |
| N3030     | Periostitis - site unspecified | 1                 |
| N3031     | Periostitis - shoulder         | 1                 |
| N3038     | Periostitis - other sites      | 1                 |
| N3039     | Periostitis - multiple sites   | 1                 |
| N2120     | Periarthritis of shoulder      | 1                 |
| N21z1     | Periarthritis NOS              | 1                 |
| N3843     | Pedicular spondylolisthesis    | 1                 |
| N0432     | Pauciarticular juvenile R.A.   | 1                 |
| N0456     | Pauciartic onset juv ch arth   | 1                 |
| N331y     | Pathological fracture OS       | 1                 |
| N331z     | Pathological fracture NOS      | 1                 |
| N082z     | Pathological dislocation NOS   | 1                 |
| N331C     | Pathological # cervical vert   | 1                 |
| N0820     | Patholog.disloc.-site unspecif | 1                 |
| N0821     | Patholog.disloc.-shoulder      | 1                 |
| N0828     | Patholog.disloc.-other specif. | 1                 |
| N082A     | Path disloc-shoulder joint     | 1                 |
| N082R     | Path disloc-patellofem joint   | 1                 |
| N082B     | Path disloc-oth joint-shoulder | 1                 |
| N0829     | Path disloc-multiple joints    | 1                 |
| N082Q     | Path disloc-knee joint         | 1                 |
| N0536-1   | Patellofemoral osteoarthritis  | 1                 |
| N0536     | Patellofemoral osteoarthritis  | 1                 |
| N07y6     | Patellofemoral maltracking     | 1                 |
| N09A      | Patellofemoral disorder        | 1                 |
| N2266     | Patellar tendon nontraum.rupt. | 1                 |
| N2164     | Patellar tendinitis            | 1                 |



1  
2  
3  
4  
5  
6  
7  
8  
9  
10  
11  
12  
13  
14  
15  
16  
17  
18  
19  
20  
21  
22  
23  
24  
25  
26  
27  
28  
29  
30  
31  
32  
33  
34  
35  
36  
37  
38  
39  
40  
41  
42  
43  
44  
45  
46  
47  
48  
49  
50  
51  
52  
53  
54  
55  
56  
57  
58  
59  
60

| Read code | Description                    | Number of studies |
|-----------|--------------------------------|-------------------|
| N33z9     | Partial epiphyseal arrest      | 1                 |
| S5421     | Part tr,knee,ant cruciate lgmt | 1                 |
| N2114     | Part thickn rotator cuff tear  | 1                 |
| S5411     | Part tear,knee,mdl collat lgmt | 1                 |
| S5401     | Part tear,knee,lat collat lgmt | 1                 |
| N1y2      | Pars interarticular strss frct | 1                 |
| N0704     | Parr beak tear-post/med menisc | 1                 |
| N0715     | Parr beak tear-post/lat menisc | 1                 |
| N2316     | Paralytic calcific/ossif muscl | 1                 |
| N243      | Panniculitis unspecified       | 1                 |
| N136      | Panniculitis of neck           | 1                 |
| N243z     | Panniculitis NOS               | 1                 |
| N093z     | Palindromic rheumatism NOS     | 1                 |
| N093      | Palindromic rheumatism         | 1                 |
| N0930     | Palindromic rheum.-site unspec | 1                 |
| N0931     | Palindromic rheum.-shoulder    | 1                 |
| N0938     | Palindromic rheum.-other spec. | 1                 |
| N0939     | Palindromic rheum.-multip.site | 1                 |
| N211z     | Painful arc syndrome           | 1                 |
| N211z-1   | Painful arc syndrome           | 1                 |
| EGTON224  | Painful Shoulder               | 1                 |
| EGTON279  | Painful Right Knee             | 1                 |
| N131-1    | Pain in cervical spine         | 1                 |
| N245-9    | Pain in buttock                | 1                 |
| N2453     | Pain in arm                    | 1                 |
| OX7280AD  | Pain Neck /ox                  | 1                 |
| OX7873E   | Pain Knee /ox                  | 1                 |
| N245-95   | Pain In Right Leg              | 1                 |
| N245-97   | Pain In Right Arm              | 1                 |
| N245-96   | Pain In Left Leg               | 1                 |
| N3101     | Paget's disease-thoracic spine | 1                 |
| N3106     | Paget's disease-scapula        | 1                 |
| N310F     | Paget's disease-patella        | 1                 |
| N310x     | Paget's disease-multiple sites | 1                 |
| N3102     | Paget's disease-lumbar spine   | 1                 |
| N3105     | Paget's disease-clavicle       | 1                 |
| N3100     | Paget's disease-cervical spine | 1                 |
| N310y     | Paget's disease OS             | 1                 |
| N310z     | Paget's disease NOS            | 1                 |
| N122-1    | PID - prolapsed lumbar disc    | 1                 |
| N129      | PID - prol i/v disc + myelop   | 1                 |
| S102y     | Othr spec clsd # thorac vert   | 1                 |
| S411y     | Othr opn trmtc disloctn shlder | 1                 |
| S410y     | Othr cls trmtc disloc shoulder | 1                 |
| SK12z     | Othershould/upperarminj.NOS    | 1                 |
| SE08      | Othercontusionneck             | 1                 |
| N06..00   | Other/unspecif. arthropathies  | 1                 |
| N12z2     | Other thoracic disc disorders  | 1                 |
| N22       | Other synovium/tendon/bursa    | 1                 |
| N22y      | Other synovium/tendon/bursa    | 1                 |
| N096B     | Other symptoms - sternoclav jt | 1                 |
| N096A     | Other symptoms - shoulder      | 1                 |
| N096M     | Other symptoms - knee          | 1                 |

| Read code | Description                                                 | Number of studies |
|-----------|-------------------------------------------------------------|-------------------|
| N096D     | Other symptoms - elbow                                      | 1                 |
| N096C     | Other symptoms - acromioclav j                              | 1                 |
| SD9y      | Other superficial injury, without mention of infection, NOS | 1                 |
| S5y       | Other sprains and strains                                   | 1                 |
| S5yz      | Other sprains NOS                                           | 1                 |
| N11y      | Other spondyloses/allied dis.                               | 1                 |
| S5W       | Other specified tendon rupture                              | 1                 |
| S54w      | Other specified knee sprain                                 | 1                 |
| SK1       | Other specified injury                                      | 1                 |
| N06y      | Other specified arthropathy                                 | 1                 |
| N233      | Other specific muscle disorder                              | 1                 |
| N04y      | Other specif.infl.polyarthrop.                              | 1                 |
| N32yz     | Other spec.osteochondrop.NOS                                | 1                 |
| N04yz     | Other spec.infl.polyarthr.NOS                               | 1                 |
| N00y      | Other spec.diff.collagen dis.                               | 1                 |
| N06y0     | Other spec.arthr.-site unspec.                              | 1                 |
| N06y1     | Other spec.arthr.-shoulder                                  | 1                 |
| N06y8     | Other spec.arthr.-other specif                              | 1                 |
| S5yy      | Other spec sprains and strains                              | 1                 |
| S50w      | Other shoulder sprain                                       | 1                 |
| SK122     | Other shoulder injuries                                     | 1                 |
| N212      | Other shoulder affections NEC                               | 1                 |
| N212z     | Other shoulder affect.NEC NOS                               | 1                 |
| SK121     | Other scapular region injuries                              | 1                 |
| N042      | Other rh.arthr.+visc/syst.dis.                              | 1                 |
| N3722     | Other post-surgical lordosis                                | 1                 |
| N21y      | Other periph. enthesopathies                                | 1                 |
| N3272     | Other osteochondr dissec-knee                               | 1                 |
| S466      | Other opn trm dscltn knee                                   | 1                 |
| S497      | Other open trmtc dislocation                                | 1                 |
| S49Fz     | Other open subluxation NOS                                  | 1                 |
| S4J3      | Other open #-subluxation                                    | 1                 |
| S4J1      | Other open #-dislocation                                    | 1                 |
| N226z     | Other nontraumatic tendon rupt                              | 1                 |
| SK10y     | Other neck injuries                                         | 1                 |
| SK1x      | Other multiple injuries                                     | 1                 |
| N12z3     | Other lumbar disc disorders                                 | 1                 |
| N07yy     | Other knee lig. old disruption                              | 1                 |
| SK170     | Other knee injury                                           | 1                 |
| N368      | Other knee deformity                                        | 1                 |
| N045      | Other juvenile arthritis                                    | 1                 |
| N326      | Other juven.osteochondroses                                 | 1                 |
| N0960     | Other joint sympt.-site unspec                              | 1                 |
| N0961     | Other joint sympt.-shoulder                                 | 1                 |
| N09y1     | Other joint dis.-shoulder                                   | 1                 |
| N08yz     | Other joint derange.NEC NOS                                 | 1                 |
| SK112     | Other interscapular injuries                                | 1                 |
| N07yz     | Other intern.knee derang.NOS                                | 1                 |
| SK1z      | Other injury NOS                                            | 1                 |
| N10y      | Other inflamm.spondylopathies                               | 1                 |
| N10yz     | Other inflamm.spondylop.NOS                                 | 1                 |
| N30y      | Other infections+bone disease                               | 1                 |

1  
2  
3  
4  
5  
6  
7  
8  
9  
10  
11  
12  
13  
14  
15  
16  
17  
18  
19  
20  
21  
22  
23  
24  
25  
26  
27  
28  
29  
30  
31  
32  
33  
34  
35  
36  
37  
38  
39  
40  
41  
42  
43  
44  
45  
46  
47  
48  
49  
50  
51  
52  
53  
54  
55  
56  
57  
58  
59  
60

| Read code | Description                         | Number of studies |
|-----------|-------------------------------------|-------------------|
| N03x      | Other general dis.+arthropathy      | 1                 |
| N237z     | Other fibromatoses NOS              | 1                 |
| N237      | Other fibromatoses                  | 1                 |
| SK10z     | Other face and neck injuries NOS    | 1                 |
| S49z      | Other dislocation NOS               | 1                 |
| N12z0     | Other disc disorders unspecif.      | 1                 |
| N08       | Other derangement of joint          | 1                 |
| N36y      | Other deformity of bone             | 1                 |
| N37y      | Other curvatures of spine           | 1                 |
| N02yz     | Other crystal arthropathy NOS       | 1                 |
| N02y      | Other crystal arthropathies         | 1                 |
| N02y0     | Other crystal arth.-site unsp.      | 1                 |
| N02y1     | Other crystal arth.-shoulder        | 1                 |
| N02yy     | Other crystal arth.-other spec      | 1                 |
| N02yx     | Other crystal arth.-mult.sites      | 1                 |
| S465      | Other cls trm dslctn knee           | 1                 |
| S49E      | Other closed traumatic sublux       | 1                 |
| S4J2      | Other closed #-sublux               | 1                 |
| S4J0      | Other closed #-dislocation          | 1                 |
| N13yz     | Other cervical syndromes NOS        | 1                 |
| N13y      | Other cervical syndromes            | 1                 |
| N12z1     | Other cervical disc disorders       | 1                 |
| N33       | Other bone/cartilage disorders      | 1                 |
| N31y      | Other bone involve.in dis.EC        | 1                 |
| SK114     | Other back injuries                 | 1                 |
| N374X     | Other and unspecified kyphosis      | 1                 |
| N06       | Other and unspecified arthropathies | 1                 |
| S462      | Other acute meniscus tear           | 1                 |
| N38yz     | Other acquired deformity NOS        | 1                 |
| N38y      | Other acquired deformity            | 1                 |
| N38       | Other acquired deformity            | 1                 |
| S4J       | Other #-dslc or subluxation         | 1                 |
| N08y0     | Oth.joint deran.NEC-site unsp.      | 1                 |
| N08y1     | Oth.joint deran.NEC-shoulder        | 1                 |
| N08y8     | Oth.joint deran.NEC-other spec      | 1                 |
| N08y9     | Oth.joint deran.NEC-mult.sites      | 1                 |
| N30y0     | Oth.inf.+bone dis-site unspec.      | 1                 |
| N30y1     | Oth.inf.+bone dis-shoulder          | 1                 |
| N30y8     | Oth.inf.+bone dis-other sites       | 1                 |
| N30y9     | Oth.inf.+bone dis-multip.site       | 1                 |
| N30yz     | Oth.inf.+bone dis-NOS               | 1                 |
| N07y      | Oth. internal knee derangement      | 1                 |
| S49       | Oth, mlti+ill-def dislc/sublux      | 1                 |
| N0401     | Oth rheumatoid arthritis-spine      | 1                 |
| S49F      | Oth open traumatic subluxation      | 1                 |
| SRy       | Oth inj inv mult body reg NEC       | 1                 |
| S496      | Oth cls trmatic dislocation         | 1                 |
| S49Ez     | Oth closed subluxation NOS          | 1                 |
| N33B      | Osteoradionecrosis                  | 1                 |
| N3746     | Osteoporotic kyphosis               | 1                 |
| N3300     | Osteoporosis unspecified            | 1                 |
| N330C     | Osteoporosis localized spine        | 1                 |
| N330A     | Osteoporosis in endocr disord       | 1                 |

| Read code | Description                                             | Number of studies |
|-----------|---------------------------------------------------------|-------------------|
| N330z     | Osteoporosis NOS                                        | 1                 |
| N330      | Osteoporosis                                            | 1                 |
| N330D     | Osteoporos due corticosteroid                           | 1                 |
| N3309     | Osteopor,multiple myelomatosis                          | 1                 |
| N3319     | Osteopor path # thor vertebrae                          | 1                 |
| N3318     | Osteopor path # lumb vertebrae                          | 1                 |
| N331A     | Osteopor path # cerv vertebrae                          | 1                 |
| N3313     | Osteopor of disuse + path frct                          | 1                 |
| N09B      | Osteophyte                                              | 1                 |
| N307      | Osteopathy from poliomyelitis                           | 1                 |
| ASDFGOS1  | Osteopaenia                                             | 1                 |
| N334B     | Osteonecrosis in caisson dis                            | 1                 |
| N3349     | Osteonecrosis due to drugs                              | 1                 |
| N334A     | Osteonecr due to prev trauma                            | 1                 |
| N334C     | Osteonecr due haemoglobinopath                          | 1                 |
| N30       | Osteomyelitis/periostitis                               | 1                 |
| N302a     | Osteomyelitis of vertebra                               | 1                 |
| N302      | Osteomyelitis NOS                                       | 1                 |
| N33zH     | Osteolytic lesion                                       | 1                 |
| N33zD     | Osteolysis                                              | 1                 |
| N32z3     | Osteochondrosis NOS                                     | 1                 |
| N32z      | Osteochondropathy NOS                                   | 1                 |
| N32zz     | Osteochondropathy NOS                                   | 1                 |
| N32       | Osteochondropathies                                     | 1                 |
| N32z2     | Osteochondritis of knee                                 | 1                 |
| N3270     | Osteochondritis dissec-patella                          | 1                 |
| N327y     | Osteochondr dissec-other site                           | 1                 |
| N3274     | Osteochondr dissec-capitellum                           | 1                 |
| N327      | Osteochond dissecans                                    | 1                 |
| OX7130E   | Osteoarthritis Shoulder /ox                             | 1                 |
| OX7130B   | Osteoarthritis Knee(S) /ox                              | 1                 |
| OX7131A   | Osteoarthritis Cervical Spine /ox                       | 1                 |
| N11z      | Osteoarthritis spine                                    | 1                 |
| N11D1     | Osteoarthritis of thoracic spine                        | 1                 |
| N11D3     | Osteoarthritis of spine NOS                             | 1                 |
| N11-2     | Osteoarthritis of spine                                 | 1                 |
| N11D      | Osteoarthritis of spine                                 | 1                 |
| N11D2     | Osteoarthritis of lumbar spine                          | 1                 |
| N11D0     | Osteoarthritis of cervical spine                        | 1                 |
| N110-2    | Osteoarthritis cervical spine                           | 1                 |
| N05z0     | Osteoarthritis NOS-site unspec                          | 1                 |
| N05z000   | Osteoarthritis NOS-site unspec                          | 1                 |
| N05z7     | Osteoarthritis NOS-ankle/foot                           | 1                 |
| N05zM     | Osteoarthritis NOS, of tibio-fibular joint              | 1                 |
| N05zQ     | Osteoarthritis NOS, of talonavicular joint              | 1                 |
| N05zK     | Osteoarthritis NOS, of sacro-iliac joint                | 1                 |
| N05zR     | Osteoarthritis NOS, of other tarsal joint               | 1                 |
| N05zF     | Osteoarthritis NOS, of metacarpophalangeal joint        | 1                 |
| N05zT     | Osteoarthritis NOS, of lesser metatarsophalangeal joint | 1                 |
| N05zU     | Osteoarthritis NOS, of interphalangeal joint of toe     | 1                 |
| N05zD     | Osteoarthritis NOS, of distal radio-ulnar joint         | 1                 |
| N05zE     | Osteoarthritis NOS of wrist                             | 1                 |

1  
2  
3  
4  
5  
6  
7  
8  
9  
10  
11  
12  
13  
14  
15  
16  
17  
18  
19  
20  
21  
22  
23  
24  
25  
26  
27  
28  
29  
30  
31  
32  
33  
34  
35  
36  
37  
38  
39  
40  
41  
42  
43  
44  
45  
46  
47  
48  
49  
50  
51  
52  
53  
54  
55  
56  
57  
58  
59  
60

| Read code | Description                      | Number of studies |
|-----------|----------------------------------|-------------------|
| N05z4     | Osteoarthritis NOS of the hand   | 1                 |
| N05z9     | Osteoarthritis NOS of shoulder   | 1                 |
| N05zL     | Osteoarthritis NOS of knee       | 1                 |
| N05zJ     | Osteoarthritis NOS of hip        | 1                 |
| N05zC     | Osteoarthritis NOS of elbow      | 1                 |
| N05zN     | Osteoarthritis NOS of ankle      | 1                 |
| N05zz00   | Osteoarthritis NOS               | 1                 |
| N05zz     | Osteoarthritis NOS               | 1                 |
| N05z1     | Osteoarthritis -shoulder joint   | 1                 |
| N05z800   | Osteoarthritis - other joint     | 1                 |
| N05z8     | Osteoarthritis - other joint     | 1                 |
| N05z6-99  | Osteoarthritis - knee joint      | 1                 |
| N05..11   | Osteoarthritis                   | 1                 |
| N094K     | Osteoarthritis                   | 1                 |
| N05       | Osteoarthritis                   | 1                 |
| N310      | Osteitis deformans-Paget's dis   | 1                 |
| N311      | Osteitis deformans+disease EC    | 1                 |
| N3350     | Osteitis condensans ilii         | 1                 |
| N335      | Osteitis condensans              | 1                 |
| N31       | Osteit.deform./osteop.+dis.EC    | 1                 |
| N3110     | Osteit deformans,neoplast dis    | 1                 |
| N3y03     | Osseous stenosis of neural canal | 1                 |
| N3y06     | Oss/sublux sten intervert foram  | 1                 |
| S900z     | Opn wound shoulder+up limb,NOS   | 1                 |
| SA10      | Opn wnd kneelg+ank-no cmplctn    | 1                 |
| S46A6     | Opn trmtc sublux,head fibula     | 1                 |
| S413z     | Opn trmtc sublux shoulder NOS    | 1                 |
| S468      | Opn trmtc sublux pat-fem jt      | 1                 |
| S46A0     | Opn trmtc sublux knee jt,unsp    | 1                 |
| S46A2     | Opn trmtc sublux knee jt,post    | 1                 |
| S46A4     | Opn trmtc sublux knee jt,ltrl    | 1                 |
| S46A1     | Opn trmtc sublux knee jt,ant     | 1                 |
| S46A      | Opn trmtc sublux knee jt         | 1                 |
| S4112     | Opn trmtc dscltn shldr jt,post   | 1                 |
| S411z     | Opn trmtc disloctn shouldr NOS   | 1                 |
| S4110     | Opn trmtc disloctn shoulder jnt  | 1                 |
| S49F4     | Opn trm sublux,st-clav jt,post   | 1                 |
| S49F3     | Opn trm sublux,st-clav jt,ant    | 1                 |
| S49F2     | Opn trm sublux st-clav jt        | 1                 |
| S4681     | Opn trm sublux pat-fem jt,med    | 1                 |
| S4680     | Opn trm sublux pat-fem jt,ltrl   | 1                 |
| S49F5     | Opn trm sublux laryngl cartlge   | 1                 |
| S46A5     | Opn trm sublux knee jt,rotatry   | 1                 |
| S46A3     | Opn trm sublux knee jt,medial    | 1                 |
| S4131     | Opn trm sublux acromio-clav jt   | 1                 |
| S4666     | Opn trm dscltn, head fibula      | 1                 |
| S464      | Opn trm dscltn patello-fem jt    | 1                 |
| S4641     | Opn trm dscltn pat-fem jt,med    | 1                 |
| S4640     | Opn trm dscltn pat-fem jt lat    | 1                 |
| S4660     | Opn trm dscltn knee, unsp        | 1                 |
| S4664     | Opn trm dscltn knee jt,lateral   | 1                 |
| S4662     | Opn trm dscltn knee jt, post     | 1                 |
| S4663     | Opn trm dscltn knee jt, medial   | 1                 |

| Read code | Description                     | Number of studies |
|-----------|---------------------------------|-------------------|
| S4661     | Opn trm dslctn knee jt, ant     | 1                 |
| S4665     | Opn trm dslct knee jt,rotatory  | 1                 |
| S4973     | Opn trm dslc, stern-clav jt,ant | 1                 |
| S4972     | Opn trm dslc sterno-clav jt     | 1                 |
| S4974     | Opn trm dsl, stern-clav jt,post | 1                 |
| S4114     | Opn trm disc acromio-clav jt    | 1                 |
| S413      | Opn traumtc subluxatn shoulder  | 1                 |
| S4130     | Opn traumtc sublux shouldr jnt  | 1                 |
| S411      | Opn traumtc disloctn shoulder   | 1                 |
| S4115     | Opn traumatic disloctn scapula  | 1                 |
| S49B      | Opn sublux thrcic+lmbr vertbra  | 1                 |
| S49B1     | Opn sublux thoracic spine       | 1                 |
| S499x     | Opn sublux mlti cerv vertebrae  | 1                 |
| S499z     | Opn sublux cerv vertebra NOS    | 1                 |
| S4991     | Opn sublux atlanto-occipitl jt  | 1                 |
| S493C     | Opn spnl dslc+cauda equina lsn  | 1                 |
| S4934     | Opn spnl dslc+ant thrc crd lsn  | 1                 |
| S4939     | Opn spnl dslc+ant lmbr crd lsn  | 1                 |
| S491B     | Opn spnl dslc+ant cerv crd lsn  | 1                 |
| S493B     | Opn spnl dsl+post lmbr crd lsn  | 1                 |
| S491D     | Opn spnl dsl+post cerv crd lsn  | 1                 |
| S4933     | Opn spnl dsl+comp thrc crd lsn  | 1                 |
| S4938     | Opn spnl dsl+comp lmbr crd lsn  | 1                 |
| S4919     | Opn spnl dsl+cerv crd lsn,unsp  | 1                 |
| S4932     | Opn spn dslc+thrc crd lsn,unsp  | 1                 |
| S4936     | Opn spn dslc+post thrc crd lsn  | 1                 |
| S491C     | Opn spn dslc+ctrl cerv crd lsn  | 1                 |
| S491A     | Opn spn dslc+comp cerv crd lsn  | 1                 |
| S4935     | Opn spn dslc+cent thrc crd lsn  | 1                 |
| S493A     | Opn spn dslc+cent lmbr crd lsn  | 1                 |
| S1150     | Opn spn # + unsp lumb crd lesn  | 1                 |
| S1154     | Opn spn # + post lumb crd lesn  | 1                 |
| S1151     | Opn spn # + comp lumb crd lesn  | 1                 |
| S1153     | Opn spn # + cent lumb crd lesn  | 1                 |
| S1155     | Opn spn # + cauda equina lesn   | 1                 |
| S1152     | Opn spn # + ant lumbr crd lesn  | 1                 |
| S5P1z     | Opn dvsn,thyroid regn lgmt NOS  | 1                 |
| S5P1      | Opn dvsn,thyroid region lgmt    | 1                 |
| S5P12     | Opn dvsn,thyroid cartilage lgmt | 1                 |
| S5P30     | Opn dvsn, sternoclavicular lgmt | 1                 |
| S5N       | Opn dvsn,lgmt other part back   | 1                 |
| S5P11     | Opn dvsn,cricothyroid ligament  | 1                 |
| S5P10     | Opn dvsn,cricoaarytenoid lgmt   | 1                 |
| S5K1      | Opn dvsn mdl collat lgmt knee   | 1                 |
| S5K0      | Opn dvsn lat collat lgmt knee   | 1                 |
| S5F1      | Opn dvsn coracoclavicular lgmt  | 1                 |
| S5F0      | Opn dvsn acromioclavic lgmt     | 1                 |
| S5K2      | Opn dvs post cruciate lgm knee  | 1                 |
| S5K3      | Opn dvs ant cruciate lgmt knee  | 1                 |
| S4931     | Opn dslc thoracic spine         | 1                 |
| S4975     | Opn dslc laryngl cartilage      | 1                 |
| S1034     | Opn # thorc vert-trnsvrse prcs  | 1                 |
| S1032     | Opn # thorc vert-spondylolysis  | 1                 |

1  
2  
3  
4  
5  
6  
7  
8  
9  
10  
11  
12  
13  
14  
15  
16  
17  
18  
19  
20  
21  
22  
23  
24  
25  
26  
27  
28  
29  
30  
31  
32  
33  
34  
35  
36  
37  
38  
39  
40  
41  
42  
43  
44  
45  
46  
47  
48  
49  
50  
51  
52  
53  
54  
55  
56  
57  
58  
59  
60

| Read code | Description                                            | Number of studies |
|-----------|--------------------------------------------------------|-------------------|
| S1033     | Opn # thorc vert-spinous prcs                          | 1                 |
| S1036     | Opn # thor vert-tricolumnar                            | 1                 |
| S1035     | Opn # thor vert-posterior arch                         | 1                 |
| S1055     | Opn # lumb vert,posterior arch                         | 1                 |
| S1054     | Opn # lumb vert, trnsvrse prcs                         | 1                 |
| S1056     | Opn # lumb vert, tricolumnar                           | 1                 |
| S1052     | Opn # lumb vert, spondylolysis                         | 1                 |
| S1053     | Opn # lumb vert, spinous prcs                          | 1                 |
| S101L     | Opn # cerv vert, trnsvrse prcs                         | 1                 |
| S101N     | Opn # cerv vert, tricolumnar                           | 1                 |
| S101J     | Opn # cerv vert, spondylolysis                         | 1                 |
| S101K     | Opn # cerv vert, spinous prcs                          | 1                 |
| S101M     | Opn # cerv vert, post arch                             | 1                 |
| S101D     | Opn # axis, trnsvrse process                           | 1                 |
| S1018     | Opn # atlas-isol arch/art prcs                         | 1                 |
| S89z      | Open wounds NOS                                        | 1                 |
| S90       | Open wound shoulder/upper limb                         | 1                 |
| S9020     | Open wound shoulder+tendon inv                         | 1                 |
| S9010     | Open wound shoulder+complicat.                         | 1                 |
| S9021     | Open wound scapular+tendon inv                         | 1                 |
| S900      | Open wound of shoulder/upper limb without complication | 1                 |
| S9000     | Open wound of shoulder region                          | 1                 |
| S87       | Open wound of sacroiliac reg.                          | 1                 |
| S84       | Open wound of neck                                     | 1                 |
| SA100     | Open wound of knee                                     | 1                 |
| S86       | Open wound of back                                     | 1                 |
| SA110     | Open wound knee+complication                           | 1                 |
| S8z       | Open wound head/neck/trunk NOS                         | 1                 |
| S8        | Open wound head/neck/trunk                             | 1                 |
| S113z     | Open thoracic #+cord lesn.NOS                          | 1                 |
| S113      | Open thoracic #+cord lesion                            | 1                 |
| S49Dz     | Open subluxation of spine NOS                          | 1                 |
| S49B0     | Open subluxation lumbar spine                          | 1                 |
| S4998     | Open subluxation C7/T1                                 | 1                 |
| S4997     | Open subluxation C6/C7                                 | 1                 |
| S4996     | Open subluxation C5/C6                                 | 1                 |
| S4995     | Open subluxation C4/C5                                 | 1                 |
| S4994     | Open subluxation C3/C4                                 | 1                 |
| S4993     | Open subluxation C2/C3                                 | 1                 |
| S49D0     | Open sublux spine, unspecified                         | 1                 |
| S49D      | Open sublux other vertebra                             | 1                 |
| S4990     | Open sublux cerv spine, unsp                           | 1                 |
| S499      | Open sublux cerv spine                                 | 1                 |
| S4992     | Open sublux atlanto-axial jt                           | 1                 |
| S49y      | Open multiple/ill-def.disloc.                          | 1                 |
| S2921     | Open mult fract clav scap hum                          | 1                 |
| S115      | Open lumbar # + cord lesion                            | 1                 |
| S2115     | Open fracture scapula, spine                           | 1                 |
| S2116     | Open fracture scapula, neck                            | 1                 |
| S2113     | Open fracture scapula, glenoid                         | 1                 |
| S2114     | Open fracture scapula, blade                           | 1                 |
| S321      | Open fracture of the patella                           | 1                 |

1  
2  
3  
4  
5  
6  
7  
8  
9  
10  
11  
12  
13  
14  
15  
16  
17  
18  
19  
20  
21  
22  
23  
24  
25  
26  
27  
28  
29  
30  
31  
32  
33  
34  
35  
36  
37  
38  
39  
40  
41  
42  
43  
44  
45  
46  
47  
48  
49  
50  
51  
52  
53  
54  
55  
56  
57  
58  
59  
60

| Read code | Description                    | Number of studies |
|-----------|--------------------------------|-------------------|
| S105      | Open fracture lumbar vertebra  | 1                 |
| S1260     | Open fracture larynx           | 1                 |
| S2012     | Open fracture clavicle, shaft  | 1                 |
| S101      | Open fracture cervical spine   | 1                 |
| S1012     | Open fracture axis             | 1                 |
| S1011     | Open fracture atlas            | 1                 |
| S5N0      | Open divsn, neck ligament      | 1                 |
| S5Fz      | Open divsn shoulder lgmt NOS   | 1                 |
| S4911     | Open dslc atlanto-occipital jt | 1                 |
| S4912     | Open dslc atlanto-axial jt     | 1                 |
| S5Nz      | Open divsn, back ligament NOS  | 1                 |
| S5N1      | Open division, thoracic lgmt   | 1                 |
| S5P       | Open division, other ligament  | 1                 |
| S5Pz      | Open division, other lig NOS   | 1                 |
| S5N2      | Open division, lumbar ligament | 1                 |
| S5F       | Open division shoulder lgmt    | 1                 |
| S5Ky      | Open division other knee lgmt  | 1                 |
| S5M5      | Open division lumbosacral lgmt | 1                 |
| S5K       | Open division ligament knee    | 1                 |
| S5Kz      | Open division knee lgmt NOS    | 1                 |
| S5M4      | Open division iliolumbar lgmt  | 1                 |
| S4950     | Open dislocation spine unspec. | 1                 |
| S495z     | Open dislocation spine NOS     | 1                 |
| S491      | Open dislocation of neck       | 1                 |
| S4930     | Open dislocation lumbar spine  | 1                 |
| S466z     | Open dislocation knee NOS      | 1                 |
| S497z     | Open dislocation NOS           | 1                 |
| S4918     | Open dislocation C7/T1         | 1                 |
| S4917     | Open dislocation C6/C7         | 1                 |
| S4916     | Open dislocation C5/C6         | 1                 |
| S4915     | Open dislocation C4/C5         | 1                 |
| S4914     | Open dislocation C3/C4         | 1                 |
| S4913     | Open dislocation C2/C3         | 1                 |
| S493      | Open disloc.thoracic/lumbar    | 1                 |
| S493z     | Open disloc.thorac./lumbar NOS | 1                 |
| S495      | Open disloc.other vertebra     | 1                 |
| S491x     | Open disloc.mult.cerv.vertebra | 1                 |
| S491z     | Open disloc.cervical vert.NOS  | 1                 |
| S4910     | Open disloc.cerv.spine unspec. | 1                 |
| S111z     | Open cervical#+cord lesion NOS | 1                 |
| S111      | Open cervical#+cord lesion     | 1                 |
| S1263     | Open #trachea                  | 1                 |
| S1262     | Open #thyroid cartilage        | 1                 |
| S11y      | Open #spine+cord lesion unsp.  | 1                 |
| S2110     | Open #scapula-unspecified      | 1                 |
| S211z     | Open #scapula NOS              | 1                 |
| S126z     | Open #larynx/trachea NOS       | 1                 |
| S1261     | Open #hyoid bone               | 1                 |
| S2010     | Open #clavicle unspecified     | 1                 |
| S201z     | Open #clavicle NOS             | 1                 |
| S3z1      | Open #bones unspecified        | 1                 |
| S4F7      | Open #-sublux,patello-fem jt   | 1                 |
| S4J33     | Open #-sublux st-clav jt,post  | 1                 |



1  
2  
3  
4  
5  
6  
7  
8  
9  
10  
11  
12  
13  
14  
15  
16  
17  
18  
19  
20  
21  
22  
23  
24  
25  
26  
27  
28  
29  
30  
31  
32  
33  
34  
35  
36  
37  
38  
39  
40  
41  
42  
43  
44  
45  
46  
47  
48  
49  
50  
51  
52  
53  
54  
55  
56  
57  
58  
59  
60

| Read code | Description                    | Number of studies |
|-----------|--------------------------------|-------------------|
| S4J32     | Open #-sublux st-clav jt,ant   | 1                 |
| S4A30     | Open #-sublux shoulder joint   | 1                 |
| S4A3      | Open #-sublux shoulder         | 1                 |
| S4F3      | Open #-sublux knee joint       | 1                 |
| S4A31     | Open #-sublux acrom-clav joint | 1                 |
| S4F5      | Open #-dslc,patello-fem jt     | 1                 |
| S4F1      | Open #-dslc, knee joint        | 1                 |
| S4J13     | Open #-dslc st-clav jt,post    | 1                 |
| S4J12     | Open #-dslc st-clav jt,ant     | 1                 |
| S4A10     | Open #-dslc shoulder joint     | 1                 |
| S4A1      | Open #-dslc shoulder           | 1                 |
| S4A11     | Open #-dslc acrom-clav joint   | 1                 |
| S1010     | Open # unsp cerv vertebra      | 1                 |
| S103      | Open # thoracic vertebra       | 1                 |
| S1031     | Open # thorac vert, wedge      | 1                 |
| S1030     | Open # thorac vert, burst      | 1                 |
| S1013     | Open # third cerv vertebra     | 1                 |
| S10y      | Open # spine, unspecif         | 1                 |
| S1016     | Open # sixth cerv vertebra     | 1                 |
| S1017     | Open # seventh cerv vert       | 1                 |
| S2112     | Open # scapula, coracoid       | 1                 |
| S2111     | Open # scapula, acromion       | 1                 |
| S211      | Open # scapula                 | 1                 |
| S3213     | Open # patella, vertical       | 1                 |
| S3210     | Open # patella, transverse     | 1                 |
| S3214     | Open # patella, stellate       | 1                 |
| S3211     | Open # patella, proximal pole  | 1                 |
| S3212     | Open # patella, distal pole    | 1                 |
| S1051     | Open # lumbar vert, wedge      | 1                 |
| S1050     | Open # lumbar vert, burst      | 1                 |
| S126      | Open # larynx and trachea      | 1                 |
| S1014     | Open # fourth cerv vertebra    | 1                 |
| S1015     | Open # fifth cerv vertebra     | 1                 |
| S2011     | Open # clavicle, medial end    | 1                 |
| S2013     | Open # clavicle, lateral end   | 1                 |
| S201      | Open # clavicle                | 1                 |
| S101H     | Open # cerv vert, wedge        | 1                 |
| S101G     | Open # cerv vert, burst        | 1                 |
| S101z     | Open # cerv spine NOS          | 1                 |
| S101F     | Open # axis, tricolumnar       | 1                 |
| S101B     | Open # axis, spondylolysis     | 1                 |
| S101C     | Open # axis, spinous procss    | 1                 |
| S101E     | Open # axis, posterior arch    | 1                 |
| S101A     | Open # axis, odontoid prcss    | 1                 |
| S1019     | Open # atlas, comminuted       | 1                 |
| S4113     | Op tr ds shd jt,inf(infr-glen) | 1                 |
| S4111     | Op tr dis shld jt,ant(sub-cor) | 1                 |
| S49Bz     | Op sublx thrc+lmbr vertbra NOS | 1                 |
| S49B2     | Op spn sublx+thrc crd lsn,unsp | 1                 |
| S49B6     | Op spn sublx+post thrc crd lsn | 1                 |
| S49BB     | Op spn sublx+post lmbr crd lsn | 1                 |
| S49B7     | Op spn sublx+lmbr crd lsn,unsp | 1                 |
| S49B3     | Op spn sublx+comp thrc crd lsn | 1                 |

| Read code | Description                                                                | Number of studies |
|-----------|----------------------------------------------------------------------------|-------------------|
| S49B8     | Op spn sublx+comp lmb crd lsn                                              | 1                 |
| S499A     | Op spn sublx+comp cerv crd lsn                                             | 1                 |
| S499C     | Op spn sublx+cntrl crv crd lsn                                             | 1                 |
| S4999     | Op spn sublx+cerv crd lsn,unsp                                             | 1                 |
| S49B5     | Op spn sublx+cent thrc crd lsn                                             | 1                 |
| S49BA     | Op spn sublx+cent lmb crd lsn                                              | 1                 |
| S49BC     | Op spn sublx+cauda equina lsn                                              | 1                 |
| S49B4     | Op spn sublx+ant thrc crd lsn                                              | 1                 |
| S499D     | Op spn subluc+post crv crd lsn                                             | 1                 |
| S49B9     | Op spn subluc+ant lmb crd lsn                                              | 1                 |
| S499B     | Op spn subluc+ant cerv crd lsn                                             | 1                 |
| S4937     | Op spn dsl+lmb crd lsn unsp                                                | 1                 |
| S1134     | Op spn #+pst thor crd lsn,T1-6                                             | 1                 |
| S1133     | Op spn #+cnt thor crd lsn,T1-6                                             | 1                 |
| S1132     | Op spn #+ant thor crd lsn,T1-6                                             | 1                 |
| S115z     | Op spn # incmp lmb crd lsn NOS                                             | 1                 |
| S1130     | Op sp #+unsp thor crd lsn,T1-6                                             | 1                 |
| S1136     | Op sp #+unsp thor cd lsn,T7-12                                             | 1                 |
| S113A     | Op sp #+pst thor crd lsn,T7-12                                             | 1                 |
| S1139     | Op sp #+cnt thor crd lsn,T7-12                                             | 1                 |
| S1131     | Op sp #+cmpl thor crd lsn,T1-6                                             | 1                 |
| S1137     | Op sp #+cmp thor crd lsn,T7-12                                             | 1                 |
| S1138     | Op sp #+ant thor crd lsn,T7-12                                             | 1                 |
| S1501     | Op multi fractur of thor spine                                             | 1                 |
| SR161     | Op fract/th wth lw bck+plv+lmb                                             | 1                 |
| SR101     | Op fract invol head with neck                                              | 1                 |
| S113B     | Op # T7-12incomp cord lsn NOS                                              | 1                 |
| S1135     | Op # T1-6 incomp cord lsn NOS                                              | 1                 |
| S1116     | Op # C5-7 unspc cord lesion                                                | 1                 |
| S111A     | Op # C5-7 posterior cord lesn                                              | 1                 |
| S111B     | Op # C5-7 incomp cord les NOS                                              | 1                 |
| S1117     | Op # C5-7 compl cord lesion                                                | 1                 |
| S1119     | Op # C5-7 central cord les                                                 | 1                 |
| S1118     | Op # C5-7 anterior cord les                                                | 1                 |
| S1110     | Op # C1-C4 unspc cord les                                                  | 1                 |
| S1114     | Op # C1-4 post cord lesion                                                 | 1                 |
| S1115     | Op # C1-4 cord les. NOS                                                    | 1                 |
| S1111     | Op # C1-4 compl cord lesion                                                | 1                 |
| S1113     | Op # C1-4 cent cord lesion                                                 | 1                 |
| S1112     | Op # C1-4 ant cord lesion                                                  | 1                 |
| N1120     | One lev th spondyl-no myelop                                               | 1                 |
| N11B0     | One lev th spondyl + radiculop                                             | 1                 |
| N1130     | One lev th spondyl + myelop                                                | 1                 |
| N1140     | One lev lumbsac spond-no myelo                                             | 1                 |
| N1150     | One lev lumbsac spond + myelop                                             | 1                 |
| N1100     | One lev Cx spondyl-no myelop                                               | 1                 |
| N1190     | One lev Cx spondyl + radiculop                                             | 1                 |
| N1110     | One lev Cx spondyl + myelop                                                | 1                 |
| N0542     | Oligoarticular osteoarthritis, unspecified, of upper arm                   | 1                 |
| N0545     | Oligoarticular osteoarthritis, unspecified, of the pelvic region and thigh | 1                 |
| N0546     | Oligoarticular osteoarthritis, unspecified, of lower leg                   | 1                 |

1  
2  
3  
4  
5  
6  
7  
8  
9  
10  
11  
12  
13  
14  
15  
16  
17  
18  
19  
20  
21  
22  
23  
24  
25  
26  
27  
28  
29  
30  
31  
32  
33  
34  
35  
36  
37  
38  
39  
40  
41  
42  
43  
44  
45  
46  
47  
48  
49  
50  
51  
52  
53  
54  
55  
56  
57  
58  
59  
60

| Read code | Description                                                   | Number of studies |
|-----------|---------------------------------------------------------------|-------------------|
| N0544     | Oligoarticular osteoarthritis, unspecified, of hand           | 1                 |
| N0543     | Oligoarticular osteoarthritis, unspecified, of forearm        | 1                 |
| N0547     | Oligoarticular osteoarthritis, unspecified, of ankle and foot | 1                 |
| N054      | Oligoarticular OA unspecified                                 | 1                 |
| N0541     | Oligoartic OA, unspec-shoulder                                | 1                 |
| N0549     | Oligoartic OA, unspec-multiple                                | 1                 |
| N0540     | Oligoartic OA, unsp-unsp sites                                | 1                 |
| N0548     | Oligoartic OA unspec-oth site                                 | 1                 |
| N2133     | Olecranon bursitis                                            | 1                 |
| N0720     | Old torn meniscus of knee                                     | 1                 |
| N070B     | Old tear post horn med menis                                  | 1                 |
| N070A     | Old tear of medial meniscus                                   | 1                 |
| N071C     | Old tear of lateral meniscus                                  | 1                 |
| N07y9     | Old post/lat caps complex tear                                | 1                 |
| N07y3     | Old post.cruciate lig.disrupt.                                | 1                 |
| N07yF     | Old part tear post cruciat lig                                | 1                 |
| N07yA     | Old part tear med collat lig                                  | 1                 |
| N07y7     | Old part tear lat collat lig                                  | 1                 |
| N07yD     | Old part tear ant cruciate lig                                | 1                 |
| N07y1     | Old med.collat.lig.disruption                                 | 1                 |
| N07yC     | Old med capsular complex tear                                 | 1                 |
| N07y0     | Old lat.collat.lig.disruption                                 | 1                 |
| N07yB     | Old compl tear med collat lig                                 | 1                 |
| N07y8     | Old compl tear lat collat lig                                 | 1                 |
| N07yG     | Old comp tear post cruciat lig                                | 1                 |
| N07yE     | Old comp tear ant cruciate lig                                | 1                 |
| N07y4     | Old capsular knee lig.disrupt.                                | 1                 |
| N0701     | Old bucket handle tear-medial                                 | 1                 |
| N0711     | Old bucket handle tear-lat men                                | 1                 |
| N07y2     | Old ant.cruciate lig.disrupt.                                 | 1                 |
| N067      | Ochronotic arthropathy                                        | 1                 |
| N054z     | OA,1 site +,unspecified NOS                                   | 1                 |
| N05zP     | OA NOS-subtalar joint                                         | 1                 |
| N05zA     | OA NOS-sternoclavicular joint                                 | 1                 |
| N05zB     | OA NOS-acromioclavicular join                                 | 1                 |
| N05zG     | OA NOS-PIP joint of finger                                    | 1                 |
| N05zH     | OA NOS-DIP joint of finger                                    | 1                 |
| N05zS     | OA NOS-1st MTP joint                                          | 1                 |
| N3381     | Nonunion of fracture                                          | 1                 |
| N226      | Nontraumatic tendon subluxatn                                 | 1                 |
| N23y2     | Nontraumatic muscle rupture                                   | 1                 |
| N2260     | Nontraum.unspec.tendon rupture                                | 1                 |
| N392      | Nonallopathic lesion-thoracic                                 | 1                 |
| N393      | Nonallopathic lesion-lumbar                                   | 1                 |
| N391      | Nonallopathic lesion-cervical                                 | 1                 |
| N082Z     | Non-trau subl acromiocl joint                                 | 1                 |
| N044      | Nodular fibrositis-chr. rheum.                                | 1                 |
| N2372     | Nodular fasciitis                                             | 1                 |
| 16A1      | No stiff neck                                                 | 1                 |
| 16C1      | No backache                                                   | 1                 |
| 1229      | No FH: Osteoporosis                                           | 1                 |
| N2471     | Night cramps                                                  | 1                 |

| Read code  | Description                           | Number of studies |
|------------|---------------------------------------|-------------------|
| N11y2      | Neuropathic spondylopathy             | 1                 |
| N2423      | Neuropathic pain                      | 1                 |
| N374B      | Neuromuscular scoliosis               | 1                 |
| N3749      | Neuromuscular lordosis                | 1                 |
| N3745      | Neuromuscular kyphosis                | 1                 |
| N14A       | Neurogenic claudication               | 1                 |
| N2421      | Neuritis unspecified                  | 1                 |
| N2420      | Neuralgia unspecified                 | 1                 |
| N242z      | Neuralg./neurit./radiculit.NOS        | 1                 |
| N242       | Neuralg./neurit./radicul.unsp.        | 1                 |
| SJ         | Nerve/spinal cord injuries            | 1                 |
| EMISNQNE5  | Nerve root pain present               | 1                 |
| SJz        | Nerve and spinal cord injury NOS      | 1                 |
| S5700      | Neck sprain unspecified               | 1                 |
| S570z      | Neck sprain NOS                       | 1                 |
| S570       | Neck sprain                           | 1                 |
| N12D       | Narrowing disc space                  | 1                 |
| N2332      | Myositis in sarcoidosis               | 1                 |
| N2321      | Myofibrosis                           | 1                 |
| N241-97    | Myalgia/myositis - shoulder           | 1                 |
| EGTON307   | Myalgia                               | 1                 |
| EMISNQMU15 | Musculoskeletal symptom               | 1                 |
| EMISNQMU5  | Musculoskeletal pain severe           | 1                 |
| EMISNQMU2  | Musculoskeletal pain present          | 1                 |
| EMISNQMU4  | Musculoskeletal pain moderate         | 1                 |
| N096-2     | Musculoskeletal pain - joints         | 1                 |
| MAWBYMU1   | Musculoskeletal Symptoms              | 1                 |
| N3         | Musculosk.inflam/deform.+other        | 1                 |
| N232z      | Muscle wasting/atrophy NEC NOS        | 1                 |
| N232       | Muscle wasting and disuse atrophy NEC | 1                 |
| N2322      | Muscle wasting NEC                    | 1                 |
| UNMAPM4AB  | Muscle strain                         | 1                 |
| N23yD      | Muscle strain                         | 1                 |
| N2410-2    | Muscle pain                           | 1                 |
| N231       | Muscle ossification                   | 1                 |
| S5yz1      | Muscle injury / strain                | 1                 |
| N238       | Muscle contracture                    | 1                 |
| N231z      | Muscle calcif./ossificat.NOS          | 1                 |
| N230D      | Muscle abscess-shoulder               | 1                 |
| N230B      | Muscle abscess-neck                   | 1                 |
| N230C      | Muscle abscess-back                   | 1                 |
| N230A      | Muscle abscess                        | 1                 |
| ASDFGMU2   | Muscle Symptoms                       | 1                 |
| EGTON110   | Muscle Injury                         | 1                 |
| M4A8       | Muscle Injury                         | 1                 |
| N2310      | Musc.calcif./ossif.unspecified        | 1                 |
| N0719      | Multiple tears-lat meniscus           | 1                 |
| N0708      | Multiple tears of medial meniscus     | 1                 |
| S101x      | Multiple open # cerv vert             | 1                 |
| SR1z       | Multiple fractures unspecified        | 1                 |
| S100x      | Multiple clsd # cerv vert             | 1                 |
| N099A      | Multiple clicking joints              | 1                 |
| S3y        | Multiple #legs/arms/ribs/stern        | 1                 |

1  
2  
3  
4  
5  
6  
7  
8  
9  
10  
11  
12  
13  
14  
15  
16  
17  
18  
19  
20  
21  
22  
23  
24  
25  
26  
27  
28  
29  
30  
31  
32  
33  
34  
35  
36  
37  
38  
39  
40  
41  
42  
43  
44  
45  
46  
47  
48  
49  
50  
51  
52  
53  
54  
55  
56  
57  
58  
59  
60

| Read code   | Description                                | Number of studies |
|-------------|--------------------------------------------|-------------------|
| S10A2       | Multip fracture/cervical spin              | 1                 |
| N11C2       | Multi lev lumbsac spond+radicu             | 1                 |
| S150        | Multi fractures/thoracic spine             | 1                 |
| S3y1        | Mult.open #legs/arms/ribs                  | 1                 |
| S3y0        | Mult.closed #legs/arms/ribs                | 1                 |
| N1122       | Mult lev th spondyl-no myelop              | 1                 |
| N11B2       | Mult lev th spondyl+radiculop              | 1                 |
| N1132       | Mult lev th spondyl + myelop               | 1                 |
| N1142       | Mult lev lumbsac spond-no myel             | 1                 |
| N1152       | Mult lev lumbsac spond + myelo             | 1                 |
| N1102       | Mult lev Cx spondyl-no myelop              | 1                 |
| N1192       | Mult lev Cx spondyl+radiculop              | 1                 |
| N1112       | Mult lev Cx spondyl + myelop               | 1                 |
| S10B6       | Mult fractur/lumbar spine+pelv             | 1                 |
| S292        | Mult fract/clav,scapula+humrus             | 1                 |
| 1D17        | Morning stiffness - joint                  | 1                 |
| N3323       | Monostotic fibrous dysplasia               | 1                 |
| N0433       | Monarticular juvenile R.A.                 | 1                 |
| EMISNQMI188 | Mixed connective tissue disease            | 1                 |
| OX6954MC    | Mixed Connective Tissue Disease /ox        | 1                 |
| N2224       | Miners' knee                               | 1                 |
| N2172       | Metatarsalgia NOS                          | 1                 |
| N063.11     | Menopausal arthritis                       | 1                 |
| N063        | Menopausal arthritis                       | 1                 |
| N072        | Meniscus derangement NEC                   | 1                 |
| N070        | Medial meniscus derangement                | 1                 |
| N070z       | Medial meniscus derange.NOS                | 1                 |
| N0703       | Medial menisc.post.horn derang             | 1                 |
| N0700       | Medial menisc.derang.unspecif              | 1                 |
| N0702       | Medial menisc.ant.horn derang.             | 1                 |
| N2131       | Medial epicondylitis - elbow               | 1                 |
| 16CA        | Mechanical low back pain                   | 1                 |
| N3380       | Malunion of fracture                       | 1                 |
| N338        | Malunion and nonunion of fracture          | 1                 |
| N11C        | Lumbosacral spondylosis with radiculopathy | 1                 |
| N115        | Lumbosacral spond.+ myelopathy             | 1                 |
| SJ35        | Lumbosacral plexus injury                  | 1                 |
| N1441       | Lumbosacral neuritis unspecif.             | 1                 |
| N1463       | Lumbosacral instability                    | 1                 |
| N1460       | Lumbosacral ankylosis                      | 1                 |
| N114-2      | Lumbar spondylosis                         | 1                 |
| N148C       | Lumbar spine instability                   | 1                 |
| N1486       | Lumbar spine ankylosis                     | 1                 |
| N1402       | Lumbar spinal stenosis                     | 1                 |
| N12A3       | Lumbar postlaminectomy syndr.              | 1                 |
| SJ321       | Lumbar nerve root injury - L2              | 1                 |
| N12zC       | Lumbar discitis                            | 1                 |
| N122        | Lumbar disc displacement                   | 1                 |
| N1293       | Lumbar disc disord.+myelopathy             | 1                 |
| N127        | Lumbar disc degeneration                   | 1                 |
| S572        | Lumbar back sprain                         | 1                 |
| N1420       | Lumbago with sciatica                      | 1                 |
| N142-4      | Lumbago                                    | 1                 |

| Read code | Description                                                        | Number of studies |
|-----------|--------------------------------------------------------------------|-------------------|
| N140A     | Lu spin stenosis due to oth dis                                    | 1                 |
| N12C2     | Lu disc prolapse+radiculopathy                                     | 1                 |
| N12B2     | Lu disc prolapse + myelopathy                                      | 1                 |
| N12C3     | Lu disc prol+caud eq compress                                      | 1                 |
| N142-1    | Low back pain                                                      | 1                 |
| EGTON264  | Low Back Pain                                                      | 1                 |
| N374W     | Lordosis unspecified                                               | 1                 |
| N3747     | Lordosis in skeletal dysplasia                                     | 1                 |
| N3748     | Lordosis in hip disease                                            | 1                 |
| N3742     | Lordosis + other condition                                         | 1                 |
| N0818     | Loose joint body-multip joints                                     | 1                 |
| N081z     | Loose joint body (ex.knee)NOS                                      | 1                 |
| N081A     | Loose body, oth joint-shoulder                                     | 1                 |
| N0811     | Loose body joint-shoulder                                          | 1                 |
| N0819     | Loose body in shoulder joint                                       | 1                 |
| N073      | Loose body in knee                                                 | 1                 |
| N081      | Loose body in joint-excl.knee                                      | 1                 |
| N0817     | Loose body in joint, joint OS                                      | 1                 |
| N0810     | Loose body in joint                                                | 1                 |
| N07yH     | Locking knee                                                       | 1                 |
| N07y5     | Locked knee                                                        | 1                 |
| N0522     | Localised, secondary osteoarthritis of the upper arm               | 1                 |
| N0525     | Localised, secondary osteoarthritis of the pelvic region and thigh | 1                 |
| N0526     | Localised, secondary osteoarthritis of the lower leg               | 1                 |
| N0524     | Localised, secondary osteoarthritis of the hand                    | 1                 |
| N0523     | Localised, secondary osteoarthritis of the forearm                 | 1                 |
| N0527     | Localised, secondary osteoarthritis of the ankle and foot          | 1                 |
| N051E     | Localised, primary osteoarthritis of toe                           | 1                 |
| N0512     | Localised, primary osteoarthritis of the upper arm                 | 1                 |
| N0515     | Localised, primary osteoarthritis of the pelvic region and thigh   | 1                 |
| N0513     | Localised, primary osteoarthritis of the forearm                   | 1                 |
| N0517     | Localised, primary osteoarthritis of the ankle and foot            | 1                 |
| N051F     | Localised, primary osteoarthritis of elbow                         | 1                 |
| N052z     | Localised secondary OA NOS                                         | 1                 |
| N051z     | Localised primary OA NOS                                           | 1                 |
| N0532     | Localised osteoarthritis, unspecified, of the upper arm            | 1                 |
| N0537     | Localised osteoarthritis, unspecified, of the ankle and foot       | 1                 |
| N053z     | Localised OA unspecified NOS                                       | 1                 |
| N053      | Localised OA unspecified                                           | 1                 |
| N052      | Local.secondary osteoarthritis                                     | 1                 |
| N0520     | Local.secondary OA-site unsp.                                      | 1                 |
| N0521     | Local.secondary OA-shoulder                                        | 1                 |
| N0528     | Local.secondary OA-other spec.                                     | 1                 |
| N051      | Local.primary osteoarthritis                                       | 1                 |
| N0510     | Local.primary OA-site unsp.                                        | 1                 |
| N0511     | Local.primary OA-shoulder regn                                     | 1                 |
| N0518     | Local.primary OA-other specif                                      | 1                 |
| N0516     | Local.primary OA-lower leg                                         | 1                 |
| N0514     | Local.primary OA-hand                                              | 1                 |

1  
2  
3  
4  
5  
6  
7  
8  
9  
10  
11  
12  
13  
14  
15  
16  
17  
18  
19  
20  
21  
22  
23  
24  
25  
26  
27  
28  
29  
30  
31  
32  
33  
34  
35  
36  
37  
38  
39  
40  
41  
42  
43  
44  
45  
46  
47  
48  
49  
50  
51  
52  
53  
54  
55  
56  
57  
58  
59  
60

| Read code | Description                        | Number of studies |
|-----------|------------------------------------|-------------------|
| N0530     | Local.OA unsp.-site unspecif.      | 1                 |
| N0531     | Local.OA unsp.-shoulder region     | 1                 |
| N0538     | Local.OA unsp.-other specified     | 1                 |
| N0534     | Local.OA unsp.-hand                | 1                 |
| N0533     | Local.OA unsp.-forearm             | 1                 |
| N051D     | Local prim osteoarth wrist         | 1                 |
| N3308     | Local osteoporosis - Lequesne      | 1                 |
| S5z       | Ligament sprain NOS                | 1                 |
| N0001     | Libman-Sacks disease               | 1                 |
| N245-6    | Leg pain                           | 1                 |
| N234      | Laxity of ligament                 | 1                 |
| SJ43      | Latrl cutaneous branch T12 inj     | 1                 |
| N071      | Lateral meniscus derangement       | 1                 |
| N0714     | Lateral meniscus derangem.NOS      | 1                 |
| N0713     | Lateral menisc.post.horn deran     | 1                 |
| N0710     | Lateral menisc.derang.unspecif     | 1                 |
| N0712     | Lateral menisc.ant.horn derang     | 1                 |
| N2132     | Lateral epicondylitis of the elbow | 1                 |
| MHTBALA9  | Lateral Patella Release            | 1                 |
| SC08      | Late effect-tendon injury          | 1                 |
| SC05      | Late effect-mult./other #bones     | 1                 |
| SC06      | Late effect-dislocation            | 1                 |
| SC01      | Late effect-#spine-no cord les     | 1                 |
| SC011     | Late effect # thoracic vert        | 1                 |
| SC012     | Late effect # lumbar vertebra      | 1                 |
| SC010     | Late effect # cervic vertebra      | 1                 |
| EGTON119  | Laceration Nos                     | 1                 |
| N3744     | Kyphosis in skeletal dysplasia     | 1                 |
| N3713     | Kyphosis due to oth treatment      | 1                 |
| N3741     | Kyphosis + other condition         | 1                 |
| N373z     | Kyphoscoliosis or scoliosis NOS    | 1                 |
| N373      | Kyphoscoliosis and scoliosis       | 1                 |
| N3241     | Kohler's dis.(prim.patell.ctr)     | 1                 |
| N0956     | Knee stiff                         | 1                 |
| S54y      | Knee sprain NOS                    | 1                 |
| S54       | Knee sprain                        | 1                 |
| N0106     | Knee pyogenic arthritis            | 1                 |
| N0826     | Knee pathological dislocation      | 1                 |
| 1M10      | Knee pain                          | 1                 |
| N05z6     | Knee osteoarthritis NOS            | 1                 |
| N05z6-1   | Knee osteoarthritis NOS            | 1                 |
| N0946-1   | Knee joint pain                    | 1                 |
| N0946     | Knee joint pain                    | 1                 |
| N0846     | Knee joint contracture             | 1                 |
| N0856     | Knee joint ankylosis               | 1                 |
| N0966     | Knee gives way                     | 1                 |
| N216z     | Knee enthesopathy NOS              | 1                 |
| N06z6-1   | Knee arthritis NOS                 | 1                 |
| N06z6     | Knee arthritis NOS                 | 1                 |
| ASDFGKN2  | Knee Pain?                         | 1                 |
| ASDFGKN6  | Knee Pain Does Not Affect Sleep    | 1                 |
| ASDFGKN4  | Knee Pain Affects Sleep?           | 1                 |
| ASDFGKN5  | Knee Pain Affects Sleep            | 1                 |

| Read code | Description                    | Number of studies |
|-----------|--------------------------------|-------------------|
| ASDFGKN3  | Knee Pain                      | 1                 |
| MUNNUKN1  | Knee Pain                      | 1                 |
| MAWBYKN1  | Knee Pain                      | 1                 |
| N0836     | Knee - recurrent dislocation   | 1                 |
| N13y1     | Klippel's disease              | 1                 |
| N116      | Kissing spine                  | 1                 |
| N002      | Keratoconjunctivitis sicca     | 1                 |
| N0600     | Kaschin-Beck dis.-site unspec. | 1                 |
| N0601     | Kaschin-Beck dis.-shoulder     | 1                 |
| N0608     | Kaschin-Beck dis.-other specif | 1                 |
| N0609     | Kaschin-Beck dis.-multipl.site | 1                 |
| N060z     | Kaschin-Beck dis.-NOS          | 1                 |
| N060      | Kaschin - Beck disease         | 1                 |
| N320z     | Juvenile spine osteochondr.NOS | 1                 |
| N3200     | Juvenile spine osteochond.unsp | 1                 |
| N0455     | Juvenile rheumatoid arthritis  | 1                 |
| N0430     | Juvenile rheumatoid arthr.unsp | 1                 |
| N043z     | Juvenile rheumatoid arthr.NOS  | 1                 |
| N3263     | Juvenile osteochondrosis NOS   | 1                 |
| N326z     | Juvenile osteochondroses NOS   | 1                 |
| N3262     | Juvenile osteochondritis NOS   | 1                 |
| N3261     | Juvenile epiphysitis NOS       | 1                 |
| N0030     | Juvenile dermatomyositis       | 1                 |
| N3260     | Juvenile apophysitis NOS       | 1                 |
| N043      | Juvenile R.A.- Still's disease | 1                 |
| OX7120DA  | Juvenile Arthritis /ox         | 1                 |
| N3243     | Juv.osteoch.secondary.pat.ctre | 1                 |
| N0451     | Juv seronegative polyarthritis | 1                 |
| N328      | Juv osteochondrosis of spine   | 1                 |
| N0452     | Juv arthritis in psoriasis     | 1                 |
| N0453     | Juv arthritis in Crohn's dis   | 1                 |
| N0454     | Juv arth in ulcerative colitis | 1                 |
| N0900     | Joint effusion-site unspecif.  | 1                 |
| N0901     | Joint effusion-shoulder region | 1                 |
| N0908     | Joint effusion-other specif.   | 1                 |
| N09z1     | Joint disord.NOS-shoulder      | 1                 |
| N08z      | Joint derangement NOS          | 1                 |
| N08zz     | Joint derangement NOS          | 1                 |
| N08z0     | Joint derange.NOS-site unspec. | 1                 |
| N08z1     | Joint derange.NOS-shoulder     | 1                 |
| N08z7     | Joint derange.NOS-other spec.  | 1                 |
| N08z8     | Joint derange.NOS-multipl.site | 1                 |
| N05z.11   | Joint degeneration             | 1                 |
| N05z      | Joint degeneration             | 1                 |
| N0840     | Joint contracture-site unspec  | 1                 |
| N0841     | Joint contracture-shoulder     | 1                 |
| N0848     | Joint contracture-other specif | 1                 |
| N0850     | Joint ankylosis-site unspecif. | 1                 |
| N0851     | Joint ankylosis-shoulder       | 1                 |
| N0858     | Joint ankylosis-other specif.  | 1                 |
| ASDFGJO2  | Joint Symptoms                 | 1                 |
| ASDFGJO3  | Joint Pain                     | 1                 |
| N3841     | Isthmic spondylolisthesis      | 1                 |



1  
2  
3  
4  
5  
6  
7  
8  
9  
10  
11  
12  
13  
14  
15  
16  
17  
18  
19  
20  
21  
22  
23  
24  
25  
26  
27  
28  
29  
30  
31  
32  
33  
34  
35  
36  
37  
38  
39  
40  
41  
42  
43  
44  
45  
46  
47  
48  
49  
50  
51  
52  
53  
54  
55  
56  
57  
58  
59  
60

| Read code | Description                       | Number of studies |
|-----------|-----------------------------------|-------------------|
| S531      | Ischiocapsular sprain             | 1                 |
| N23yB     | Ischaemic infarction of muscle    | 1                 |
| N123-1    | Intervertebral disc prol. NOS     | 1                 |
| N12z      | Intervertebral disc lesion NOS    | 1                 |
| OX7259AP  | Intervertebral Disc Prolapsed /ox | 1                 |
| N3y05     | Intervert disc sten neur canal    | 1                 |
| N23y0     | Interstitial myositis             | 1                 |
| N07z      | Internal knee derangement NOS     | 1                 |
| N07       | Internal derangement of knee      | 1                 |
| N1350     | Intermittent torticollis          | 1                 |
| N090W     | Intermittent hydrarthrosis        | 1                 |
| N084E     | Int rotat contracture-shoulder    | 1                 |
| N08y      | Instability of joint              | 1                 |
| SJ7z      | Injury to other nerve NOS         | 1                 |
| SKz       | Injury NOS                        | 1                 |
| OX9967C   | Injury Knee /ox                   | 1                 |
| SJ9       | Injur/nerv+spinal crd/thorx lev   | 1                 |
| SJB       | Inj/nerves/should+upp arm lev     | 1                 |
| S46C      | Inj/multipl structures of knee    | 1                 |
| S5Q6      | Inj tendon rotator cuff should    | 1                 |
| N2166     | Infrapatellar bursitis            | 1                 |
| N10       | Inflammatory spondylopathies      | 1                 |
| N04       | Inflammatory polyarthropathy      | 1                 |
| N04*      | Inflammatory arthropathy          | 1                 |
| N10y0     | Inflamm.spondylop.in dis. EC      | 1                 |
| N04z      | Inflamm.polyarthropathy NOS       | 1                 |
| S4103     | Inferior dislocation shoulder     | 1                 |
| N2302     | Infective myositis-shoulder       | 1                 |
| N2300     | Infective myositis-neck           | 1                 |
| N2301     | Infective myositis-back           | 1                 |
| N01z      | Infective arthritis NOS           | 1                 |
| N01zz     | Infective arthritis NOS           | 1                 |
| N302B     | Infection of thoracic spine       | 1                 |
| N302G     | Infection of scapula              | 1                 |
| N302R     | Infection of patella              | 1                 |
| N302Z     | Infection of multiple bones       | 1                 |
| N302C     | Infection of lumbar spine         | 1                 |
| N302F     | Infection of clavicle             | 1                 |
| N302A     | Infection of cervical spine       | 1                 |
| N01z0     | Infect.arthr.NOS-site unspecif    | 1                 |
| N01z1     | Infect.arthr.NOS-shoulder reg     | 1                 |
| N01zy     | Infect.arthr.NOS-other specifi    | 1                 |
| N01zx     | Infect.arthr.NOS-multiple site    | 1                 |
| N12zG     | Infect intervert disc - pyogen    | 1                 |
| N01z8     | Infec arthritis NOS-shoulder      | 1                 |
| N01zK     | Infec arthritis NOS-knee          | 1                 |
| N01z9     | Infec arthr NOS-sternoclav jt     | 1                 |
| N01zA     | Infec arth NOS-acromioclav jt     | 1                 |
| N23y5     | Inappropriate firing of muscle    | 1                 |
| N2124     | Impingement syndr of shoulder     | 1                 |
| N2331     | Immobility syndrome               | 1                 |
| N2159     | Iliotibial band syndrome          | 1                 |
| N1403     | Idiopathic th spinal stenosis     | 1                 |

| Read code | Description                       | Number of studies |
|-----------|-----------------------------------|-------------------|
| N3730     | Idiopathic scoliosis              | 1                 |
| N3303     | Idiopathic osteoporosis           | 1                 |
| N1407     | Idiopathic lu spinal stenosis     | 1                 |
| N3731     | Idiopathic kyphoscoliosis         | 1                 |
| N33z7     | Idiopathic hypertrophy of bone    | 1                 |
| N1300     | Idiopathic Cx spinal stenosis     | 1                 |
| N3316     | Idiopath osteopor + path fract    | 1                 |
| N3348     | Idiopath aseptic necrosis of bone | 1                 |
| N1405     | iatrogenic th spinal stenosis     | 1                 |
| N1409     | iatrogenic lu spinal stenosis     | 1                 |
| N1302     | iatrogenic Cx spinal stenosis     | 1                 |
| C04*      | Hypothyroidism                    | 1                 |
| N2431     | Hypertrophy of knee fat pad       | 1                 |
| N33z4     | Hypertrophy of bone               | 1                 |
| N3382     | Hypertrophic non-union of #       | 1                 |
| N312      | Hypertroph.pulm.osteoarthrop.     | 1                 |
| N02y8     | Hydroxyapatite deposition dis     | 1                 |
| N2225     | Housemaids knee                   | 1                 |
| N0707     | Horiz cleavage tear-med menisc    | 1                 |
| N0718     | Horiz cleavage tear-lat menisc    | 1                 |
| N094K-2   | Hip pain                          | 1                 |
| N05z5     | Hip osteoarthritis NOS            | 1                 |
| N05z5-1   | Hip osteoarthritis NOS            | 1                 |
| N0535     | Hip osteoarthritis NOS            | 1                 |
| N0535-2   | Hip osteoarthritis NOS            | 1                 |
| N06z5     | Hip arthritis NOS                 | 1                 |
| N0809     | Hill-Sachs lesion                 | 1                 |
| N245-5    | Heel pain                         | 1                 |
| N0507     | Heberden's nodes with arthropathy | 1                 |
| N245-4    | Hand pain                         | 1                 |
| N2450     | Hand pain                         | 1                 |
| N0944-1   | Hand joint pain                   | 1                 |
| N06z4-1   | Hand arthritis NOS                | 1                 |
| N068      | Haemophilic arthropathy           | 1                 |
| N091B     | Haemarthrosis-sternoclav joint    | 1                 |
| N0910     | Haemarthrosis-site unspecified    | 1                 |
| N0911     | Haemarthrosis-shoulder            | 1                 |
| N0918     | Haemarthrosis-other specified     | 1                 |
| N0919     | Haemarthrosis-multiple joints     | 1                 |
| N091C     | Haemarthrosis-acromioclav jt      | 1                 |
| N0916     | Haemarthrosis of the knee         | 1                 |
| N091A     | Haemarthrosis of shoulder         | 1                 |
| N091M     | Haemarthrosis of knee             | 1                 |
| N091z     | Haemarthrosis NOS                 | 1                 |
| N091      | Haemarthrosis                     | 1                 |
| N083M     | Habitual sublux shoulder          | 1                 |
| N083L     | Habitual disloc shoulder          | 1                 |
| N083r     | Habitual disloc - patella         | 1                 |
| 14G8      | H/O: vertebral fracture           | 1                 |
| 14G1      | H/O: rheumatoid arthritis         | 1                 |
| 14G2      | H/O: osteoarthritis               | 1                 |
| 14GZ      | H/O: musculo-skeletal dis. NOS    | 1                 |
| 14G3      | H/O: knee problem                 | 1                 |

1  
2  
3  
4  
5  
6  
7  
8  
9  
10  
11  
12  
13  
14  
15  
16  
17  
18  
19  
20  
21  
22  
23  
24  
25  
26  
27  
28  
29  
30  
31  
32  
33  
34  
35  
36  
37  
38  
39  
40  
41  
42  
43  
44  
45  
46  
47  
48  
49  
50  
51  
52  
53  
54  
55  
56  
57  
58  
59  
60

| Read code  | Description                     | Number of studies |
|------------|---------------------------------|-------------------|
| 14J        | H/O: injury                     | 1                 |
| 14G4       | H/O: back problem               | 1                 |
| 14T5       | H/O: artificial joint           | 1                 |
| 14V5       | H/O: arthrodesis                | 1                 |
| 14G        | H/O: arthritis                  | 1                 |
| 14N30      | H/O Spinal surgery              | 1                 |
| 16Z2       | Growing pains                   | 1                 |
| S3z00      | Greenstick fracture             | 1                 |
| N0230      | Gouty arthritis-site unspecif.  | 1                 |
| N0231      | Gouty arthritis-shoulder        | 1                 |
| N023y      | Gouty arthritis-other specif.   | 1                 |
| N023x      | Gouty arthritis-multiple sites  | 1                 |
| N023z      | Gouty arthritis NOS             | 1                 |
| N023       | Gouty arthritis                 | 1                 |
| N2131-1    | Golfer's elbow                  | 1                 |
| N200       | Gnt cell arter+polymyalg rheum  | 1                 |
| EGTON444   | Gluteal Muscle Injury           | 1                 |
| N0873      | Glenoid labrum tear             | 1                 |
| N0872      | Glenoid labrum detachment       | 1                 |
| N365       | Genu recurvatum - acquired      | 1                 |
| N050z      | Generalised osteoarthritis NOS  | 1                 |
| N050z00    | Generalised osteoarthritis NOS  | 1                 |
| N050       | Generalised osteoarthritis - OA | 1                 |
| N050.0     | Generalised osteoarthritis - OA | 1                 |
| N065A      | Generalised arthritis           | 1                 |
| N065A00    | Generalised arthritis           | 1                 |
| N05000     | Generalised OA-site unspecif.   | 1                 |
| N0500      | Generalised OA-site unspecif.   | 1                 |
| N050200    | Generalised OA-multiple sites   | 1                 |
| N0502      | Generalised OA-multiple sites   | 1                 |
| N0501      | Generalised OA-hand             | 1                 |
| N224z      | Ganglion/synovial cyst NOS      | 1                 |
| N224       | Ganglion/synov.cyst - knee      | 1                 |
| N224-92    | Ganglion/synov.cyst - knee      | 1                 |
| N2243      | Ganglion unspecified            | 1                 |
| N2245      | Ganglion of wrist               | 1                 |
| N2242      | Ganglion of tendon sheath       | 1                 |
| N2246      | Ganglion of knee                | 1                 |
| N2241      | Ganglion of joint               | 1                 |
| N224C      | Ganglion of foot                | 1                 |
| EMISR4QFU2 | Fusion Of Lumbar Spine          | 1                 |
| EMISR4QFU1 | Fusion Of Cervical Spine        | 1                 |
| N2115      | Full thickn rotator cuff tear   | 1                 |
| N210-2     | Frozen shoulder                 | 1                 |
| N331N      | Fragility fracture              | 1                 |
| N331M      | Fragility # unsp osteoporosis   | 1                 |
| S10B       | Fracture/lumbar spine+pelvis    | 1                 |
| S10A1      | Fracture/2nd cervical vertebra  | 1                 |
| S10A0      | Fracture/1st cervical vertebra  | 1                 |
| S15        | Fracture of thoracic vertebra   | 1                 |
| S1z        | Fracture of neck and trunk NOS  | 1                 |
| S1         | Fracture of neck and trunk      | 1                 |
| S10A       | Fracture of neck                | 1                 |

| Read code | Description                       | Number of studies |
|-----------|-----------------------------------|-------------------|
| S10B0     | Fracture of lumbar vertebra       | 1                 |
| N338z     | Fracture malunion or nonunion NOS | 1                 |
| SR1       | Fracture involv multi body reg    | 1                 |
| SR10      | Fracture involv head with neck    | 1                 |
| S4        | Fracture dislocation/subluxat     | 1                 |
| OX8056    | Fracture Spine /ox                | 1                 |
| S3z       | Fracture NOS                      | 1                 |
| OXL8056LV | Fracture Lumbar Vertebra /ox      | 1                 |
| SR16      | Fract/thorx with lw bck+plv+lmb   | 1                 |
| N3317     | Fract of bone in neoplast dis     | 1                 |
| N2451     | Foot pain                         | 1                 |
| N245-3    | Foot pain                         | 1                 |
| 1M11      | Foot pain                         | 1                 |
| N220B     | Flexor tenosynovitis of finger    | 1                 |
| N3660     | Flexion deformity of knee         | 1                 |
| N369      | Flexion deformity                 | 1                 |
| N084A     | Flexion contracture-shoulder      | 1                 |
| N084a     | Flexion contracture-knee          | 1                 |
| N374E     | Flatback syndrome                 | 1                 |
| N040T     | Flare of rheumatoid arthritis     | 1                 |
| N08yA     | Flail joint                       | 1                 |
| N09C      | Fistula of joint                  | 1                 |
| N2450-2   | Finger pain                       | 1                 |
| N05z4-1   | Finger osteoarthritis NOS         | 1                 |
| N2163     | Fibular collat.lig.bursitis       | 1                 |
| N3324     | Fibrous cortical defect           | 1                 |
| N2405     | Fibrositis of neck                | 1                 |
| N00y1     | Fibrosclerosis systemic           | 1                 |
| N087      | Fibrocartilage lesion of joint    | 1                 |
| MHTBAFH1  | Fh: Osteoporosis                  | 1                 |
| N041      | Felty's syndrome                  | 1                 |
| N1y1      | Fatigue fracture of vertebra      | 1                 |
| N244      | Fasciitis unspecified             | 1                 |
| N024      | Familial chondrocalcinosis        | 1                 |
| N14y      | Facet joint syndrome              | 1                 |
| 12I1      | FH: Rheumatoid arthritis          | 1                 |
| 1268      | FH: Osteoporosis                  | 1                 |
| 12I2      | FH: Osteoarthritis                | 1                 |
| 12IZ      | FH: Musculo-skeletal dis. NOS     | 1                 |
| 12I       | FH: Arthritis                     | 1                 |
| N220D     | Extensor tenosynovitis of wrist   | 1                 |
| N220F     | Extensor tenosynovitis of thumb   | 1                 |
| N220E     | Extensor tenosynovitis of finger  | 1                 |
| N084B     | Extension contracture-shoulder    | 1                 |
| N084F     | Ext rotat contracture-shoulder    | 1                 |
| N21z7     | Exostosis                         | 1                 |
| 16C8      | Exacerbation of backache          | 1                 |
| N0506     | Erosive osteoarthrosis            | 1                 |
| N32z1     | Epiphysitis NOS                   | 1                 |
| N33z1     | Epiphyseal arrest                 | 1                 |
| N00y0     | Eosinophilic fasciitis            | 1                 |
| N216      | Enthesopathy of knee              | 1                 |
| N21z      | Enthesopathy NOS                  | 1                 |

1  
2  
3  
4  
5  
6  
7  
8  
9  
10  
11  
12  
13  
14  
15  
16  
17  
18  
19  
20  
21  
22  
23  
24  
25  
26  
27  
28  
29  
30  
31  
32  
33  
34  
35  
36  
37  
38  
39  
40  
41  
42  
43  
44  
45  
46  
47  
48  
49  
50  
51  
52  
53  
54  
55  
56  
57  
58  
59  
60

| Read code | Description                        | Number of studies |
|-----------|------------------------------------|-------------------|
| N11y1     | Enterobacterial spondylitis        | 1                 |
| 1M00-1    | Elbow pain                         | 1                 |
| 1M00      | Elbow pain                         | 1                 |
| N05z2     | Elbow osteoarthritis NOS           | 1                 |
| N06z2     | Elbow arthritis NOS                | 1                 |
| N090B     | Effusion of sternoclav joint       | 1                 |
| N090A     | Effusion of shoulder               | 1                 |
| N0909     | Effusion of multiple joints        | 1                 |
| N090M     | Effusion of knee                   | 1                 |
| N090z     | Effusion of joint NOS              | 1                 |
| N090      | Effusion of joint                  | 1                 |
| N090C     | Effusion of acromioclav joint      | 1                 |
| N0906     | Effusion - knee joint              | 1                 |
| N0906-99  | Effusion - knee joint              | 1                 |
| N3840     | Dysplastic spondylolisthesis       | 1                 |
| N2361     | Dupuyt dis-palm + nod no cont      | 1                 |
| N3305     | Drug-induced osteoporosis          | 1                 |
| N0002     | Drug-ind systemic lupus eryth      | 1                 |
| N3315     | Drug-ind osteopor + path fract     | 1                 |
| N235      | Double-jointed (hypermobility)     | 1                 |
| N1123     | Dorsal spondylo w/o myelopath      | 1                 |
| N3370     | Disuse atrophy of bone             | 1                 |
| N3304     | Dissuse osteoporosis               | 1                 |
| N0000     | Disseminated lupus erythemat.      | 1                 |
| N09AX     | Disorder of patella unspecified    | 1                 |
| N33zG     | Disorder of cartilage, unspec      | 1                 |
| N33zF     | Disorder of bone unspecified       | 1                 |
| S46       | Dislocation or subluxation of knee | 1                 |
| S4z       | Dislocation or subluxation NOS     | 1                 |
| S41z      | Dislocation of shoulder NOS        | 1                 |
| S46z      | Dislocation of knee NOS            | 1                 |
| S41       | Dislocated shoulder                | 1                 |
| S463-99   | Dislocated patella                 | 1                 |
| SR20      | Disloc,sprns+strns inv hd+neck     | 1                 |
| SR2       | Dislc,sprns+strns/mult bdy reg     | 1                 |
| N071B     | Discoid lateral meniscus           | 1                 |
| N123      | Disc unsp.displ.-no myelopathy     | 1                 |
| N12B      | Disc prolapse with myelopathy      | 1                 |
| N12C      | Disc prolapse + radiculopathy      | 1                 |
| N12zz     | Disc disorders NOS                 | 1                 |
| N129z     | Disc disorder+myelopathy NOS       | 1                 |
| N00       | Diffuse connective tissue dis.     | 1                 |
| N097z     | Difficulty in walking NOS          | 1                 |
| N097      | Difficulty in walking              | 1                 |
| N23yA     | Diastasis of muscle                | 1                 |
| N33z3     | Diaphysitis                        | 1                 |
| N0300     | Diabetic cheiroarthropathy         | 1                 |
| N0301     | Diabetic Charcot arthropathy       | 1                 |
| N003X     | Dermatopolymyositis, unspec        | 1                 |
| N0031     | Dermatopolymyositis,neoplast dis   | 1                 |
| N003      | Dermatomyositis                    | 1                 |
| SC0z      | Delayed union of fracture          | 1                 |
| N3386     | Delayed union of fracture          | 1                 |

| Read code | Description                     | Number of studies |
|-----------|---------------------------------|-------------------|
| S9030     | Degloving injury,shoulder area  | 1                 |
| SA130     | Degloving injury knee           | 1                 |
| N3842     | Degenerative spondylolisthesis  | 1                 |
| N128      | Degenerative disc disease NOS   | 1                 |
| N1404     | Degenerativ th spinal stenosis  | 1                 |
| N1408     | Degenerativ lu spinal stenosis  | 1                 |
| N1301     | Degenerativ Cx spinal stenosis  | 1                 |
| N114      | Degeneration of lumbar spine    | 1                 |
| N114-1    | Degeneration of lumbar spine    | 1                 |
| N0721     | Degen lesion artic cart knee    | 1                 |
| N36y4     | Deformity of scapula            | 1                 |
| N36yD     | Deformity of patella            | 1                 |
| N36y3     | Deformity of clavicle           | 1                 |
| N36y2     | Deformity of bone               | 1                 |
| N224D     | Cyst of tendon sheath           | 1                 |
| N0722     | Cyst of semilunar cartilage     | 1                 |
| N0709     | Cyst of medial meniscus         | 1                 |
| N071A     | Cyst of lateral meniscus        | 1                 |
| N2244     | Cyst of bursa                   | 1                 |
| N332z     | Cyst of bone NOS                | 1                 |
| N332      | Cyst of bone                    | 1                 |
| N11A      | Cx spondyl + vasc compression   | 1                 |
| N1303     | Cx spin stenosis due to oth dis | 1                 |
| N12C0     | Cx disc prolapse+radiculopathy  | 1                 |
| N12B0     | Cx disc prolapse + myelopathy   | 1                 |
| N3740     | Curvature of spine unspecified  | 1                 |
| N37zz     | Curvature of spine NOS          | 1                 |
| N37z      | Curvature of spine NOS          | 1                 |
| N37       | Curvature of spine              | 1                 |
| N02zK     | Crystal arthropathy NOS-knee    | 1                 |
| N02zz     | Crystal arthropathy NOS         | 1                 |
| N02z      | Crystal arthropathy NOS         | 1                 |
| N02z0     | Crystal arthr.NOS-site unspec.  | 1                 |
| N02z1     | Crystal arthr.NOS-shoulder      | 1                 |
| N02zy     | Crystal arthr.NOS-other spec.   | 1                 |
| N02zx     | Crystal arthr.NOS-multipl.site  | 1                 |
| N02z9     | Cryst arthr NOS-sternoclav jt   | 1                 |
| N02zA     | Cryst arthr NOS-acromioclav jt  | 1                 |
| N02z8     | Crys arthr NOS-shoulder         | 1                 |
| SF20z     | Crushinjuryshlder+uparmNOS      | 1                 |
| SFz       | Crushing injury NOS             | 1                 |
| SF        | Crushing injury                 | 1                 |
| SF40      | Crush injury multiple sites NEC | 1                 |
| SF021     | Crush injury larynx             | 1                 |
| SF311     | Crush injury knee               | 1                 |
| SF110     | Crush injury back               | 1                 |
| SF4z      | Crush injury                    | 1                 |
| N13y2     | Crick in neck                   | 1                 |
| N2472     | Cramp                           | 1                 |
| N051A     | Coxarthr from dysplasia, bilat  | 1                 |
| N3216     | Coxa plana                      | 1                 |
| 182B0     | Costal margin chest pain        | 1                 |
| N2123     | Coracoid impingement            | 1                 |

1  
2  
3  
4  
5  
6  
7  
8  
9  
10  
11  
12  
13  
14  
15  
16  
17  
18  
19  
20  
21  
22  
23  
24  
25  
26  
27  
28  
29  
30  
31  
32  
33  
34  
35  
36  
37  
38  
39  
40  
41  
42  
43  
44  
45  
46  
47  
48  
49  
50  
51  
52  
53  
54  
55  
56  
57  
58  
59  
60

| Read code | Description                          | Number of studies |
|-----------|--------------------------------------|-------------------|
| S502      | Coracohumeral sprain                 | 1                 |
| SE30z     | Contusionshlder+uer arm NOS          | 1                 |
| SE44      | Contusionlwr limbmlti sites          | 1                 |
| SE00      | Contusion, forehead                  | 1                 |
| SEz       | Contusion with skin intact NOS       | 1                 |
| SE30      | Contusion shoulder or upper arm      | 1                 |
| SE300     | Contusion shoulder area              | 1                 |
| SE301     | Contusion scapular area              | 1                 |
| SE231     | Contusion of lower back              | 1                 |
| SE232     | Contusion of lower back              | 1                 |
| SE4y      | Contusion multiple sites NEC         | 1                 |
| SE41z     | Contusion knee and lower leg NOS     | 1                 |
| SE411     | Contusion knee                       | 1                 |
| SE0z      | Contusion face scalp+neck NOS        | 1                 |
| SE304     | Contusion clavicular area            | 1                 |
| SE23z     | Contusion back NOS                   | 1                 |
| SE        | Contusion (bruise) with intact skin  | 1                 |
| N22y0     | Contracture of tendon sheath         | 1                 |
| N23yC     | Contracture of muscle                | 1                 |
| N0849     | Contracture of multiple joints       | 1                 |
| N084z     | Contracture of joint NOS             | 1                 |
| N084      | Contracture of joint                 | 1                 |
| N         | Connective tissue diseases           | 1                 |
| N3y04     | Connect tiss sten neural canal       | 1                 |
| PE1       | Congenital sternomastoid torticollis | 1                 |
| N3y07     | Con tis/disc sten intervrt for       | 1                 |
| N33C      | Complex regionl pain syndrom I       | 1                 |
| S5C       | Complete tear, knee ligament         | 1                 |
| S58z      | Complete tear shoulder joint NOS     | 1                 |
| S58       | Complete tear shoulder joint         | 1                 |
| N33z8     | Complete epiphyseal arrest           | 1                 |
| N33z6     | Compensatory hypertrophy-bone        | 1                 |
| SK0y      | Compartmentsyndrome                  | 1                 |
| S5A0D     | Comp tr shrt intr lig non-sp         | 1                 |
| N331D     | Collapsed vertebra NOS               | 1                 |
| N331      | Collapse of vertebra NOS             | 1                 |
| N331F     | Collapse of thoracic vertebra        | 1                 |
| N3310     | Collapse of thoracic vertebra        | 1                 |
| N3311     | Collapse of lumbar vertebra          | 1                 |
| N331G     | Collapse of lumbar vertebra          | 1                 |
| N331E     | Collapse of cervical vertebra        | 1                 |
| N331L     | Collap vert due osteopor NOS         | 1                 |
| N331J     | Collap lumb vert due to osteo        | 1                 |
| N331H     | Collap cerv vert due to osteop       | 1                 |
| N00z      | Collagen disease NOS                 | 1                 |
| N331K     | Coll thorac vert due osteopor        | 1                 |
| N147z     | Coccyx disorder NOS                  | 1                 |
| N1472     | Coccygodynia                         | 1                 |
| S5E1      | Cmplt tr,thyroid region lgmt         | 1                 |
| S5E30     | Cmplt tr,sternoclavicular lgmt       | 1                 |
| S5Ez      | Cmplt tr,other lgmt NOS              | 1                 |
| S5Cy      | Cmplt tr,other knee lgmt             | 1                 |
| S5C1      | Cmplt tr,knee,mdl collat lgmt        | 1                 |

| Read code | Description                    | Number of studies |
|-----------|--------------------------------|-------------------|
| S5C0      | Cmplt tr,knee,lat collat lgmt  | 1                 |
| S5Cz      | Cmplt tr,knee lgmt NOS         | 1                 |
| S581      | Cmplt tr,coraco-clav lgmt      | 1                 |
| S580      | Cmplt tr,acromio-clav lgmt     | 1                 |
| S5A0A     | Cmplt tr triang fibrocartilage | 1                 |
| S5C3      | Cmpl tr,knee,ant cruciate lgmt | 1                 |
| S5y57     | Cmpl tear,lumbosacral lgmt     | 1                 |
| S5y56     | Cmpl tear,iliolumbar lgmt      | 1                 |
| S5C2      | Cmp tr,knee,post cruciate lgmt | 1                 |
| S2920     | Clsd mult fract clav scap hum  | 1                 |
| S1000     | Clsd # unsp cerv vertebra      | 1                 |
| S1024     | Clsd # thorc vert-trnsvrs prcs | 1                 |
| S1026     | Clsd # thorc vert - tricolumnr | 1                 |
| S1025     | Clsd # thorc vert - post prcs  | 1                 |
| S1020     | Clsd # thoracic vert, burst    | 1                 |
| S1021     | Clsd # thoracic vert wedge     | 1                 |
| S102z     | Clsd # thorac vert NOS         | 1                 |
| S1023     | Clsd # thor vert-spinous prcss | 1                 |
| S1003     | Clsd # third cerv vertebra     | 1                 |
| S2102     | Clsd # scapula, coracoid       | 1                 |
| S1041     | Clsd # lumbar vert wedge       | 1                 |
| S1040     | Clsd # lumbar vert burst       | 1                 |
| S1046     | Clsd # lumb vert - tricolumnar | 1                 |
| S1004     | Clsd # fourth cerv vertebra    | 1                 |
| S1005     | Clsd # fifth cerv vertebra     | 1                 |
| S2001     | Clsd # clavicle medial end     | 1                 |
| S2003     | Clsd # clavical lateral end    | 1                 |
| S100H     | Clsd # cerv vert, wedge        | 1                 |
| S100G     | Clsd # cerv vert, burst        | 1                 |
| S100z     | Clsd # cerv spine NOS          | 1                 |
| S100F     | Clsd # axis, tricolumnar       | 1                 |
| S100D     | Clsd # axis, transvrse process | 1                 |
| S100B     | Clsd # axis, spondylolysis     | 1                 |
| S100C     | Clsd # axis, spinous process   | 1                 |
| S100E     | Clsd # axis, posterior arch    | 1                 |
| S100A     | Clsd # axis odontoid process   | 1                 |
| S1009     | Clsd # atlas, comminuted       | 1                 |
| S1106     | Clsd # C5-C7 unspec cord les   | 1                 |
| S110A     | Clsd # C5-C7 post cord lesion  | 1                 |
| S110B     | Clsd # C5-C7 incomp cord les   | 1                 |
| S1107     | Clsd # C5-C7 complete cord les | 1                 |
| S1109     | Clsd # C5-C7 cent cord lesion  | 1                 |
| S1108     | Clsd # C5-C7 ant cord lesion   | 1                 |
| S1100     | Clsd # C1-C4 unspec cord les   | 1                 |
| S1104     | Clsd # C1-C4 post cord lesion  | 1                 |
| S1105     | Clsd # C1-C4 incomp cord les   | 1                 |
| S1101     | Clsd # C1-C4 complete cord les | 1                 |
| S1103     | Clsd # C1-C4 cent cord lesion  | 1                 |
| S1102     | Clsd # C1-C4 ant cord lesion   | 1                 |
| S4120     | Cls trmtc subluxatn shldr jnt  | 1                 |
| S4696     | Cls trmtc sublux,head fibula   | 1                 |
| S467      | Cls trmtc sublux pat-fem jt    | 1                 |
| S4690     | Cls trmtc sublux knee jt,unsp  | 1                 |



1  
2  
3  
4  
5  
6  
7  
8  
9  
10  
11  
12  
13  
14  
15  
16  
17  
18  
19  
20  
21  
22  
23  
24  
25  
26  
27  
28  
29  
30  
31  
32  
33  
34  
35  
36  
37  
38  
39  
40  
41  
42  
43  
44  
45  
46  
47  
48  
49  
50  
51  
52  
53  
54  
55  
56  
57  
58  
59  
60

| Read code | Description                      | Number of studies |
|-----------|----------------------------------|-------------------|
| S4692     | Cls trmtc sublux knee jt,post    | 1                 |
| S4694     | Cls trmtc sublux knee jt,ltrl    | 1                 |
| S4691     | Cls trmtc sublux knee jt,ant     | 1                 |
| S469      | Cls trmtc sublux knee jt         | 1                 |
| S4102     | Cls trmtc dsclctn shldr jtpost   | 1                 |
| S410z     | Cls trmtc dislctn shoulder NOS   | 1                 |
| S49E4     | Cls trm sublux,st-clav jt,post   | 1                 |
| S49E3     | Cls trm sublux,st-clav jt,ant    | 1                 |
| S49E2     | Cls trm sublux st-clav jt        | 1                 |
| S4671     | Cls trm sublux pat-fem jt,med    | 1                 |
| S4670     | Cls trm sublux pat-fem jt,ltrl   | 1                 |
| S49E5     | Cls trm sublux laryngl cart      | 1                 |
| S4695     | Cls trm sublux knee jt,rotatry   | 1                 |
| S4693     | Cls trm sublux knee jt,medial    | 1                 |
| S4121     | Cls trm sublux acromio-clav jt   | 1                 |
| S4656     | Cls trm dsclctn, head fibula     | 1                 |
| S4631     | Cls trm dsclctn pat-fem jt,med   | 1                 |
| S4630     | Cls trm dsclctn pat-fem jt,lat   | 1                 |
| S4650     | Cls trm dsclctn knee, unspc      | 1                 |
| S4654     | Cls trm dsclctn knee jt,lateral  | 1                 |
| S4652     | Cls trm dsclctn knee jt, post    | 1                 |
| S4653     | Cls trm dsclctn knee jt, medial  | 1                 |
| S4651     | Cls trm dsclctn knee jt, ant     | 1                 |
| S465z     | Cls trm dsclctn knee NOS         | 1                 |
| S4655     | Cls trm dsclct knee jt,rotatory  | 1                 |
| S4963     | Cls trm dscl, stern-clav jt,ant  | 1                 |
| S4962     | Cls trm dscl sterno-clav jt      | 1                 |
| S4965     | Cls trm dscl laryngl cartilage   | 1                 |
| S4964     | Cls trm dscl, stern-clav jt,post | 1                 |
| S412      | Cls traumtc subluxatn shoulder   | 1                 |
| S410      | Cls traumtc disloctn shoulder    | 1                 |
| S4105     | Cls traumatic disloctn scapula   | 1                 |
| S49A      | Cls sublux thrcic+lumbar spine   | 1                 |
| S49A1     | Cls sublux thrcic spine          | 1                 |
| S49Az     | Cls sublux thrc+lmb spine NOS    | 1                 |
| S498x     | Cls sublux mlti cerv vertebrae   | 1                 |
| S4980     | Cls sublux cervical spine,unsp   | 1                 |
| S498      | Cls sublux cervical spine        | 1                 |
| S498z     | Cls sublux cerv vertebra NOS     | 1                 |
| S4981     | Cls sublux atlanto-occipitl jt   | 1                 |
| S4982     | Cls sublux atlanto-axial jt      | 1                 |
| S492C     | Cls spnl dsclc+cauda equina lsn  | 1                 |
| S4924     | Cls spnl dsclc+ant thrc crd lsn  | 1                 |
| S4929     | Cls spnl dsclc+ant lmb crd lsn   | 1                 |
| S490B     | Cls spnl dsclc+ant cerv crd lsn  | 1                 |
| S492B     | Cls spnl dsl+post lmb crd lsn    | 1                 |
| S4923     | Cls spnl dsl+comp thrc crd lsn   | 1                 |
| S4928     | Cls spnl dsl+comp lmb crd lsn    | 1                 |
| S4922     | Cls spn dsclc+thrc crd lsn,unsp  | 1                 |
| S4926     | Cls spn dsclc+post thrc crd lsn  | 1                 |
| S490D     | Cls spn dsclc+post cerv crd lsn  | 1                 |
| S4925     | Cls spn dsclc+cent thrc crd lsn  | 1                 |
| S492A     | Cls spn dsclc+cent lmb crd lsn   | 1                 |

1  
2  
3  
4  
5  
6  
7  
8  
9  
10  
11  
12  
13  
14  
15  
16  
17  
18  
19  
20  
21  
22  
23  
24  
25  
26  
27  
28  
29  
30  
31  
32  
33  
34  
35  
36  
37  
38  
39  
40  
41  
42  
43  
44  
45  
46  
47  
48  
49  
50  
51  
52  
53  
54  
55  
56  
57  
58  
59  
60

| Read code | Description                                              | Number of studies |
|-----------|----------------------------------------------------------|-------------------|
| S1140     | Cls spn # + unsp lumb crd lesn                           | 1                 |
| S1144     | Cls spn # + post lumb crd lesn                           | 1                 |
| S1141     | Cls spn # + comp lumb crd lesn                           | 1                 |
| S1143     | Cls spn # + cent lumb crd lesn                           | 1                 |
| S1145     | Cls spn # + cauda equina lesn                            | 1                 |
| S1142     | Cls spn # + ant lumbr crd lesn                           | 1                 |
| SR100     | Cls fract invol head with neck                           | 1                 |
| S492z     | Cls dslc thrcic+lmb spine NOS                            | 1                 |
| S492      | Cls dslc thoracic+lumbar spine                           | 1                 |
| S4921     | Cls dslc thoracic vertebra                               | 1                 |
| S4920     | Cls dslc lumbar spine                                    | 1                 |
| S4901     | Cls dslc atlanto-occipital jnt                           | 1                 |
| S4902     | Cls dslc atlanto-axial joint                             | 1                 |
| S4F6      | Cls #-sublux,patello-fem jt                              | 1                 |
| S4J23     | Cls #-sublux st-clav jt,post                             | 1                 |
| S4J22     | Cls #-sublux st-clav jt,ant                              | 1                 |
| S4F4      | Cls #-dslc,patello-fem jt                                | 1                 |
| S4J03     | Cls #-dslc st-clav jt,post                               | 1                 |
| S4J02     | Cls #-dslc st-clav jt,ant                                | 1                 |
| S1022     | Cls # thorc vert-spondylolysis                           | 1                 |
| S1044     | Cls # lumbr vert-trnsvrse prcs                           | 1                 |
| S1042     | Cls # lumbr vert-spondylolysis                           | 1                 |
| S1043     | Cls # lumbr vert-spinous prcss                           | 1                 |
| S1045     | Cls # lumb vert-posterior arch                           | 1                 |
| S100L     | Cls # cerv vert, trnsvrse prcs                           | 1                 |
| S100N     | Cls # cerv vert, tricolumnar                             | 1                 |
| S100J     | Cls # cerv vert, spondylolysis                           | 1                 |
| S100K     | Cls # cerv vert, spinous prcss                           | 1                 |
| S100M     | Cls # cerv vert, post arch                               | 1                 |
| S1008     | Cls # atlas-isol arch/art prcs                           | 1                 |
| S412z     | Closed traumatic subluxation shoulder NOS                | 1                 |
| S496z     | Closed traumatic disloctn NOS                            | 1                 |
| S4100     | Closed traumatic dislocation shoulder joint, unspecified | 1                 |
| S463      | Closed traumatic dislocation of patello-femoral joint    | 1                 |
| S112z     | Closed thoracic#+cord lesn.NOS                           | 1                 |
| S112      | Closed thoracic #+cord lesion                            | 1                 |
| S49Cz     | Closed subluxation spine NOS                             | 1                 |
| S49A0     | Closed subluxation lumbar spine                          | 1                 |
| S4988     | Closed subluxation C7/T1                                 | 1                 |
| S4987     | Closed subluxation C6/C7                                 | 1                 |
| S4986     | Closed subluxation C5/C6                                 | 1                 |
| S4985     | Closed subluxation C4/C5                                 | 1                 |
| S4984     | Closed subluxation C3/C4                                 | 1                 |
| S4983     | Closed subluxation C2/C3                                 | 1                 |
| S49C0     | Closed sublux spine, unsp                                | 1                 |
| S49C      | Closed sublux other vertebra                             | 1                 |
| S026      | Closed orbital blow-out fracture                         | 1                 |
| S114      | Closed lumbar # + cord lesion                            | 1                 |
| S102      | Closed fracture thoracic vertebra                        | 1                 |
| S2104     | Closed fracture scapula, blade                           | 1                 |
| S2105     | Closed fracture scapula spine                            | 1                 |
| S2106     | Closed fracture scapula neck                             | 1                 |

1  
2  
3  
4  
5  
6  
7  
8  
9  
10  
11  
12  
13  
14  
15  
16  
17  
18  
19  
20  
21  
22  
23  
24  
25  
26  
27  
28  
29  
30  
31  
32  
33  
34  
35  
36  
37  
38  
39  
40  
41  
42  
43  
44  
45  
46  
47  
48  
49  
50  
51  
52  
53  
54  
55  
56  
57  
58  
59  
60

| Read code | Description                                    | Number of studies |
|-----------|------------------------------------------------|-------------------|
| S2103     | Closed fracture scapula glenoid                | 1                 |
| S2101     | Closed fracture scapula acromion               | 1                 |
| S3204     | Closed fracture patella, comminuted (stellate) | 1                 |
| S320      | Closed fracture of the patella                 | 1                 |
| S1250     | Closed fracture larynx                         | 1                 |
| S2002     | Closed fracture clavicle shaft                 | 1                 |
| S1002     | Closed fracture axis                           | 1                 |
| S1001     | Closed fracture atlas                          | 1                 |
| S4940     | Closed dislocation spine unsp.                 | 1                 |
| S494z     | Closed dislocation spine NOS                   | 1                 |
| S490      | Closed dislocation cervical spine              | 1                 |
| S4908     | Closed dislocation C7/T1                       | 1                 |
| S4907     | Closed dislocation C6/C7                       | 1                 |
| S4906     | Closed dislocation C5/C6                       | 1                 |
| S4905     | Closed dislocation C4/C5                       | 1                 |
| S4904     | Closed dislocation C3/C4                       | 1                 |
| S4903     | Closed dislocation C2/C3                       | 1                 |
| S494      | Closed disloc.other vertebra                   | 1                 |
| S490x     | Closed disloc.mult.cerv.vert.                  | 1                 |
| S490z     | Closed disloc.cervic.vert.NOS                  | 1                 |
| S4900     | Closed disloc.cerv.spine unsp.                 | 1                 |
| S4960     | Closed disloc sternoclavic. jt                 | 1                 |
| S4104     | Closed disloc acromioclavic.jt                 | 1                 |
| S110z     | Closed cervical#+cord lesn.NOS                 | 1                 |
| S110      | Closed cervical #+cord lesion                  | 1                 |
| S1253     | Closed #trachea                                | 1                 |
| S1252     | Closed #thyroid cartilage                      | 1                 |
| S11x      | Closed #spine+cord lesn.unsp.                  | 1                 |
| S2100     | Closed #scapula-unspecified                    | 1                 |
| S210z     | Closed #scapula NOS                            | 1                 |
| S125z     | Closed #larynx/trachea NOS                     | 1                 |
| S1251     | Closed #hyoid bone                             | 1                 |
| S2000     | Closed #clavicle unspecified                   | 1                 |
| S200z     | Closed #clavicle NOS                           | 1                 |
| S3z0      | Closed #bones unspecified                      | 1                 |
| S4F2      | Closed #-sublux, knee joint                    | 1                 |
| S4A20     | Closed #-sublux shoulder joint                 | 1                 |
| S4A2      | Closed #-sublux shoulder                       | 1                 |
| S4A21     | Closed #-sublux acrom-clav jt                  | 1                 |
| S4A00     | Closed #-dslc shoulder joint                   | 1                 |
| S4A0      | Closed #-dslc shoulder                         | 1                 |
| S4F0      | Closed #-dslc knee joint                       | 1                 |
| S4A01     | Closed #-dslc acrom-clav joint                 | 1                 |
| S10x      | Closed # spine unspecif                        | 1                 |
| S210      | Closed # scapula                               | 1                 |
| S3201     | Closed # patella,proximal pole                 | 1                 |
| S3203     | Closed # patella, vertical                     | 1                 |
| S3200     | Closed # patella transverse                    | 1                 |
| S3202     | Closed # patella distal pole                   | 1                 |
| S200      | Closed # clavicle                              | 1                 |
| S100      | Closed # cervical spine                        | 1                 |
| N063000   | Climacteric arthr.-site unsp.                  | 1                 |
| N0630     | Climacteric arthr.-site unsp.                  | 1                 |

| Read code | Description                                            | Number of studies |
|-----------|--------------------------------------------------------|-------------------|
| N0631     | Climacteric arthr.-shoulder                            | 1                 |
| N0638     | Climacteric arthr.-other spec.                         | 1                 |
| N063800   | Climacteric arthr.-other spec.                         | 1                 |
| N0639     | Climacteric arthr.-multip.site                         | 1                 |
| N063900   | Climacteric arthr.-multip.site                         | 1                 |
| N063z     | Climacteric arthr.-NOS                                 | 1                 |
| N063z00   | Climacteric arthr.-NOS                                 | 1                 |
| N0991     | Clicking sternoclavic joint                            | 1                 |
| N0990     | Clicking shoulder                                      | 1                 |
| N099C     | Clicking knee                                          | 1                 |
| N099      | Clicking joint                                         | 1                 |
| N0992     | Clicking acromioclavicular joint                       | 1                 |
| N33A1     | Clavicle pain                                          | 1                 |
| S490A     | Cl spnl dslc+comp cerv crd lsn                         | 1                 |
| S4909     | Cl spnl dslc+cerv crd lsn,unsp                         | 1                 |
| S49A2     | Cl spn sublx+thrc crd lsn,unsp                         | 1                 |
| S49A6     | Cl spn sublx+post thrc crd lsn                         | 1                 |
| S49AB     | Cl spn sublx+post lmbcrd crd lsn                       | 1                 |
| S49A7     | Cl spn sublx+lmbcrd crd lsn,unsp                       | 1                 |
| S49A3     | Cl spn sublx+comp thrc crd lsn                         | 1                 |
| S49A8     | Cl spn sublx+comp lmbcrd crd lsn                       | 1                 |
| S498A     | Cl spn sublx+comp cerv crd lsn                         | 1                 |
| S498C     | Cl spn sublx+cntrl crv crd lsn                         | 1                 |
| S4989     | Cl spn sublx+cerv crd lsn,unsp                         | 1                 |
| S49A5     | Cl spn sublx+cent thrc crd lsn                         | 1                 |
| S49AA     | Cl spn sublx+cent lmbcrd crd lsn                       | 1                 |
| S49AC     | Cl spn sublx+cauda equina lsn                          | 1                 |
| S49A4     | Cl spn sublx+ant thrc crd lsn                          | 1                 |
| S49A9     | Cl spn sublx+ant lmbcrd crd lsn                        | 1                 |
| S498D     | Cl spn sublux+post crv crd lsn                         | 1                 |
| S498B     | Cl spn sublux+ant cerv crd lsn                         | 1                 |
| S490C     | Cl spn dslc+cntrl cerv crd lsn                         | 1                 |
| S4927     | Cl spn dsl+lmbcrd crd lsn unsp                         | 1                 |
| S1124     | Cl spn #+pst thor crd lsn,T1-6                         | 1                 |
| S1123     | Cl spn #+cnt thor crd lsn,T1-6                         | 1                 |
| S1122     | Cl spn #+ant thor crd lsn,T1-6                         | 1                 |
| S1120     | Cl sp #+unsp thor crd lsn,T1-6                         | 1                 |
| S1126     | Cl sp #+unsp thor cd lsn,T7-12                         | 1                 |
| S112A     | Cl sp #+pst thor crd lsn,T7-12                         | 1                 |
| S1129     | Cl sp #+cnt thor crd lsn,T7-12                         | 1                 |
| S1121     | Cl sp #+cmpl thor crd lsn,T1-6                         | 1                 |
| S1127     | Cl sp #+cmp thor crd lsn,T7-12                         | 1                 |
| S1128     | Cl sp #+ant thor crd lsn,T7-12                         | 1                 |
| S1500     | Cl multi fractur of thor spine                         | 1                 |
| SR160     | Cl fract/th wth lw bck+plv+lmb                         | 1                 |
| S112B     | Cl # T7-12incomp cord lsn NOS                          | 1                 |
| S1125     | Cl # T1-6 incmpl cord lesn NOS                         | 1                 |
| N301B     | Chronic osteomyelitis-th spine                         | 1                 |
| N301C     | Chronic osteomyelitis-lu spine                         | 1                 |
| N301A     | Chronic osteomyelitis-Cx spine                         | 1                 |
| N301      | Chronic osteomyelitis                                  | 1                 |
| C052*     | Chronic lymphocytic thyroiditis (Hashimotos's disease) | 1                 |

1  
2  
3  
4  
5  
6  
7  
8  
9  
10  
11  
12  
13  
14  
15  
16  
17  
18  
19  
20  
21  
22  
23  
24  
25  
26  
27  
28  
29  
30  
31  
32  
33  
34  
35  
36  
37  
38  
39  
40  
41  
42  
43  
44  
45  
46  
47  
48  
49  
50  
51  
52  
53  
54  
55  
56  
57  
58  
59  
60

| Read code | Description                             | Number of studies |
|-----------|-----------------------------------------|-------------------|
| 16C9      | Chronic low back pain                   | 1                 |
| N090X     | Chronic joint effusion                  | 1                 |
| N3682     | Chronic instability of knee             | 1                 |
| OX7289CB  | Chronic Backache /ox                    | 1                 |
| N3010     | Chron.osteomyelitis-site unsp.          | 1                 |
| N3011     | Chron.osteomyelitis-shoulder            | 1                 |
| N3018     | Chron.osteomyelitis-other spec          | 1                 |
| N3019     | Chron.osteomyelitis-mult.site           | 1                 |
| N301z     | Chron.osteomyelitis NOS                 | 1                 |
| N301L     | Chron multifocal osteomyelitis          | 1                 |
| N301M     | Chr osteomyel + draining sinus          | 1                 |
| N074      | Chondromalacia patellae                 | 1                 |
| N33z2     | Chondromalacia NOS                      | 1                 |
| N33zB     | Chondrolysis                            | 1                 |
| N022      | Chondrocalcinosis unspecified           | 1                 |
| N022z     | Chondrocalcinosis NOS                   | 1                 |
| N02       | Chondrocalcinosis                       | 1                 |
| N0220     | Chondrocalc.unsp.-site unspec.          | 1                 |
| N0221     | Chondrocalc.unsp.-shoulder reg          | 1                 |
| N022y     | Chondrocalc.unsp.-other spec.           | 1                 |
| N022x     | Chondrocalc.unsp.-multipl.site          | 1                 |
| N020z     | Chondrocalc.dicalc.phos.NOS             | 1                 |
| N021      | Chondrocalc.-pyrophosph.cryst.          | 1                 |
| N021z     | Chondrocalc.-pyrophosph.NOS             | 1                 |
| N020      | Chondrocalc.-dicalc.phos.cryst          | 1                 |
| N0210     | Chondroc.-pyrophos.-site unsp.          | 1                 |
| N0211     | Chondroc.-pyrophos.-shoulder            | 1                 |
| N021y     | Chondroc.-pyrophos.-other spec          | 1                 |
| N021x     | Chondroc.-pyrophos.-mult.sites          | 1                 |
| N0216     | Chondroc.-pyrophos.-knee                | 1                 |
| N0200     | Chondroc.-dical.ph.-site unsp.          | 1                 |
| N0201     | Chondroc.-dical.ph.-shoulder            | 1                 |
| N020y     | Chondroc.-dical.ph.-other spec          | 1                 |
| N020x     | Chondroc.-dical.ph.-mult.sites          | 1                 |
| N33zJ     | Chondritis                              | 1                 |
| 182C      | Chest wall pain                         | 1                 |
| N035      | Charcots arthropathy                    | 1                 |
| N132      | Cervicocranial syndrome                 | 1                 |
| N133      | Cervicobrachial syndrome                | 1                 |
| N148A     | Cervico-thoracic instability            | 1                 |
| N1483     | Cervico-thoracic ankylosis              | 1                 |
| N131      | Cervicalgia                             | 1                 |
| N138      | Cervicalgia                             | 1                 |
| N13y0     | Cervical syndrome NEC                   | 1                 |
| N119      | Cervical spondylosis with radiculopathy | 1                 |
| N11E      | Cervical spondylosis                    | 1                 |
| N110-1    | Cervical spondylosis                    | 1                 |
| N110      | Cervical spond.- no myelopathy          | 1                 |
| N111      | Cervical spond.+ myelopathy             | 1                 |
| N1489     | Cervical spine instability              | 1                 |
| N1482     | Cervical spine ankylosis                | 1                 |
| N130      | Cervical spinal stenosis                | 1                 |
| N13y3     | Cervical root syndrome                  | 1                 |

| Read code | Description                     | Number of studies |
|-----------|---------------------------------|-------------------|
| N12A1     | Cervical postlaminectomy syndr  | 1                 |
| N137      | Cervical post.long.lig.ossific  | 1                 |
| SJ306     | Cervical nerve root injury - C7 | 1                 |
| SJ305     | Cervical nerve root injury - C6 | 1                 |
| SJ304     | Cervical nerve root injury - C5 | 1                 |
| SJ303     | Cervical nerve root injury - C4 | 1                 |
| SJ30      | Cervical nerve root injury      | 1                 |
| N1113     | Cervical myelopathy             | 1                 |
| N13       | Cervical disorder NOS           | 1                 |
| N12z4     | Cervical discitis               | 1                 |
| N120      | Cervical disc displ.-no myelop  | 1                 |
| N1291     | Cervical disc disord.+myelop.   | 1                 |
| N125      | Cervical disc degeneration      | 1                 |
| S5701     | Cervical ant.longit.lig.sprain  | 1                 |
| N13z      | Cervical and neck disorders NOS | 1                 |
| N12zH     | Cerv disc disord + radiculoph   | 1                 |
| N21z0     | Capsulitis NOS                  | 1                 |
| N04y0     | Caplan's syndrome               | 1                 |
| N3202     | Calve's vertebral osteochondr.  | 1                 |
| N2454     | Calf pain                       | 1                 |
| N2226     | Calcium deposit in bursa        | 1                 |
| N2111     | Calcifying tendinitis shoulder  | 1                 |
| N12zB     | Calcification of thoracic disc  | 1                 |
| N22y1     | Calcification of tendon NOS     | 1                 |
| N12zF     | Calcification of lumbar disc    | 1                 |
| N23y1     | Calcification of ligament       | 1                 |
| N12z7     | Calcification of cervical disc  | 1                 |
| N23y9     | Calcific tendinitis             | 1                 |
| N2177     | Calcaneal spur                  | 1                 |
| N2315     | Calc/ossif musc ass with burns  | 1                 |
| N0011     | CREST syndrome                  | 1                 |
| 182Z.00   | CHEST PAIN NOS                  | 1                 |
| 182..00   | CHEST PAIN                      | 1                 |
| S1007     | C7 closed # - no cord lesion    | 1                 |
| S1006     | C6 closed # - no cord lesion    | 1                 |
| 1D12.00   | C/O: stiffness                  | 1                 |
| 1D12      | C/O: stiffness                  | 1                 |
| 16C7      | C/O - upper back ache           | 1                 |
| 1A53      | C/O - lumbar pain               | 1                 |
| 16C5      | C/O - low back pain             | 1                 |
| N2118     | Bursitis of shoulder            | 1                 |
| N223      | Bursitis NOS                    | 1                 |
| N2160-99  | Bursitis - knee                 | 1                 |
| N2160     | Bursitis - knee                 | 1                 |
| N221      | Bunion                          | 1                 |
| 16BZ      | Bruising symptom NOS            | 1                 |
| 16B       | Bruising symptom                | 1                 |
| 16B2      | Bruises easily                  | 1                 |
| SE4z      | Bruise NOS                      | 1                 |
| SE41      | Bruise - knee/lower leg         | 1                 |
| SE41-99   | Bruise - knee/lower leg         | 1                 |
| SE23      | Bruise - back                   | 1                 |
| N11y0     | Brucella spondylitis            | 1                 |

1  
2  
3  
4  
5  
6  
7  
8  
9  
10  
11  
12  
13  
14  
15  
16  
17  
18  
19  
20  
21  
22  
23  
24  
25  
26  
27  
28  
29  
30  
31  
32  
33  
34  
35  
36  
37  
38  
39  
40  
41  
42  
43  
44  
45  
46  
47  
48  
49  
50  
51  
52  
53  
54  
55  
56  
57  
58  
59  
60

| Read code | Description                       | Number of studies |
|-----------|-----------------------------------|-------------------|
| N3325     | Brown tumour-hyperparathyroid     | 1                 |
| N301G     | Brodie's abscess-thorac spine     | 1                 |
| N301H     | Brodie's abscess-lumbar spine     | 1                 |
| N301F     | Brodie's abscess-cervic spine     | 1                 |
| N302b     | Brodie's abscess                  | 1                 |
| N0503     | Bouchard's nodes with arthropathy | 1                 |
| N33z      | Bone/cartilage disorder NOS       | 1                 |
| N33z0     | Bone/cartilage dis.-unspecif.     | 1                 |
| N21z3     | Bone spur NOS                     | 1                 |
| N33A      | Bone pain                         | 1                 |
| N33zz     | Bone or cartilage disorders NOS   | 1                 |
| N31z      | Bone involvement in dis.EC NOS    | 1                 |
| N30z0     | Bone infectn.NOS-site unspecif    | 1                 |
| N30z1     | Bone infectn.NOS-shoulder         | 1                 |
| N30z9     | Bone infectn.NOS-multiple site    | 1                 |
| N30z      | Bone infection NOS                | 1                 |
| N30zz     | Bone infection NOS                | 1                 |
| N3320     | Bone cyst (localised),unspecif    | 1                 |
| N3y0      | Biomec lesn,not elsewh clas       | 1                 |
| N2112     | Bicipital tenosynovitis           | 1                 |
| N2134     | Biceps tendinitis                 | 1                 |
| N0120     | Behcet's syndrome arthropathy     | 1                 |
| N2222     | Beat knee                         | 1                 |
| N0870     | Bankart lesion                    | 1                 |
| N224A     | Baker's cyst                      | 1                 |
| N224A-1   | Baker's cyst                      | 1                 |
| 16        | Baker's cyst                      | 1                 |
| 16C3      | Backache with radiation           | 1                 |
| 16CZ      | Backache symptom NOS              | 1                 |
| 16C       | Backache symptom                  | 1                 |
| 16C2      | Backache                          | 1                 |
| N149      | Back stiffness                    | 1                 |
| S57       | Back sprain excl. lumbosacral     | 1                 |
| 16...     | Back sprain NOS                   | 1                 |
| S57z      | Back sprain NOS                   | 1                 |
| 16C4      | Back pain worse on sneezing       | 1                 |
| 16C6      | Back pain without radiat NOS      | 1                 |
| N145-2    | Back pain unspecified             | 1                 |
| N143      | Back pain - lower                 | 1                 |
| UNMAPPC6  | Back injury                       | 1                 |
| N14       | Back disorders - other            | 1                 |
| N14z      | Back disorder/symptom NOS         | 1                 |
| OX8479    | Back Strain/Sprain /ox            | 1                 |
| OX7289A   | Back Pain With Sciatica /ox       | 1                 |
| N2455     | Axillary pain                     | 1                 |
| N3347     | Avascular necrosis-other bone     | 1                 |
| N3345     | Avascular necrosis, capitellum    | 1                 |
| N334      | Avascular necrosis - bone         | 1                 |
| N334z     | Avascular bone necrosis NOS       | 1                 |
| N3340     | Avasc.bone necrosis site unsp.    | 1                 |
| N3383     | Atrophic non-union of fracture    | 1                 |
| S5703     | Atlanto-occipital joint sprain    | 1                 |
| N1487     | Atlanto-occipital instability     | 1                 |

| Read code | Description                                           | Number of studies |
|-----------|-------------------------------------------------------|-------------------|
| N1480     | Atlanto-occipital ankylosis                           | 1                 |
| S5702     | Atlanto-axial joint sprain                            | 1                 |
| N1488     | Atlanto-axial instability                             | 1                 |
| N1481     | Atlanto-axial ankylosis                               | 1                 |
| 14OD      | At risk of osteoporotic fracture                      | 1                 |
| 14O9      | At risk of osteoporosis                               | 1                 |
| N080z     | Articular cartilage disord.NOS                        | 1                 |
| N080      | Articular cart.disor.excl.knee                        | 1                 |
| N0800     | Artic.cart.dis.-site unspecif.                        | 1                 |
| N0801     | Artic.cart.dis.-shoulder                              | 1                 |
| N0807     | Artic.cart.dis.-other specif.                         | 1                 |
| N0808     | Artic.cart.dis.-multiple sites                        | 1                 |
| N080B     | Artic cart disord oth j-should                        | 1                 |
| N0539     | Arthrosis of first carpometacarpal joint, unspecified | 1                 |
| OX7131C   | Arthrosis Spine /ox                                   | 1                 |
| N0312     | Arthropathy-Whipple's disease                         | 1                 |
| N034      | Arthropathy+respiratory disord                        | 1                 |
| N015      | Arthropathy+other viral diseas                        | 1                 |
| N01y      | Arthropathy+other inf./parasit                        | 1                 |
| N03y      | Arthropathy+other condition EC                        | 1                 |
| N015z     | Arthropathy+oth.viral dis. NOS                        | 1                 |
| N014      | Arthropathy+oth.bacterial dis.                        | 1                 |
| N017z     | Arthropathy+helminthiasis NOS                         | 1                 |
| N032      | Arthropathy+haematological dis                        | 1                 |
| N031      | Arthropathy+gastrointestin.dis                        | 1                 |
| N030      | Arthropathy+endocr./metab.dis                         | 1                 |
| N033      | Arthropathy+dermatological dis                        | 1                 |
| N01       | Arthropathy with infections                           | 1                 |
| N0310     | Arthropathy in ulcerative colitis                     | 1                 |
| N069      | Arthropathy in neoplastic dis                         | 1                 |
| N0302     | Arthropathy in amyloidosis                            | 1                 |
| N0148     | Arthropathy in Whipple's disea                        | 1                 |
| N0311     | Arthropathy in Crohn's disease                        | 1                 |
| N0320     | Arthropathy due to haemophilia                        | 1                 |
| N06z1     | Arthropathy NOS-shoulder                              | 1                 |
| N06z4     | Arthropathy NOS-hand                                  | 1                 |
| N06z3     | Arthropathy NOS-forearm                               | 1                 |
| N06z7     | Arthropathy NOS, of the ankle and foot                | 1                 |
| N017      | Arthropathy + parasite infectn                        | 1                 |
| N016z     | Arthropathy + mycoses NOS                             | 1                 |
| N016      | Arthropathy + mycoses                                 | 1                 |
| N03z      | Arthropathy + disorders EC NOS                        | 1                 |
| N03       | Arthropathy + disorders EC                            | 1                 |
| N0y       | Arthropathies OS                                      | 1                 |
| N0313     | Arthropath follow intes bypass                        | 1                 |
| N036      | Arthrop-hypersensitivity reacn                        | 1                 |
| N012      | Arthrop+Behcet's syndrome                             | 1                 |
| N0121     | Arthrop+Behcet's synd-shoulder                        | 1                 |
| N012y     | Arthrop+Behcet's synd-oth spec                        | 1                 |
| N012x     | Arthrop+Behcet's synd-multiple                        | 1                 |
| N012z     | Arthrop+Behcet's synd NOS                             | 1                 |
| N2330     | Arthrogryposis                                        | 1                 |
| N0        | Arthritis/arthrosis                                   | 1                 |



1  
2  
3  
4  
5  
6  
7  
8  
9  
10  
11  
12  
13  
14  
15  
16  
17  
18  
19  
20  
21  
22  
23  
24  
25  
26  
27  
28  
29  
30  
31  
32  
33  
34  
35  
36  
37  
38  
39  
40  
41  
42  
43  
44  
45  
46  
47  
48  
49  
50  
51  
52  
53  
54  
55  
56  
57  
58  
59  
60

| Read code | Description                       | Number of studies |
|-----------|-----------------------------------|-------------------|
| N11       | Arthritis of spine                | 1                 |
| N010A     | Arthritis in Lyme disease         | 1                 |
| OX6960T   | Arthritis Psoriatic /ox           | 1                 |
| N06z-1    | Arthritis                         | 1                 |
| N094F     | Arthralgia of wrist               | 1                 |
| N094N     | Arthralgia of tibio-fibular joint | 1                 |
| N094A     | Arthralgia of shoulder            | 1                 |
| N094M     | Arthralgia of knee                | 1                 |
| N094D     | Arthralgia of elbow               | 1                 |
| N094P     | Arthralgia of ankle               | 1                 |
| N094H     | Arthralgia of PIP joint of finger | 1                 |
| N094G     | Arthralgia of MCP joint           | 1                 |
| N094T     | Arthralgia of 1st MTP joint       | 1                 |
| N0942     | Arthralgia - upper arm            | 1                 |
| N094B     | Arthralgia - sternoclav joint     | 1                 |
| N0941     | Arthralgia - shoulder             | 1                 |
| N0945     | Arthralgia - pelvic/thigh         | 1                 |
| N0944     | Arthralgia - hand                 | 1                 |
| N0943     | Arthralgia - forearm              | 1                 |
| N0947     | Arthralgia - ankle/foot           | 1                 |
| N094C     | Arthralgia - acromioclav joint    | 1                 |
| EGTON1    | Arthralgia                        | 1                 |
| N0150     | Arthr.+oth.viral dis-site unsp    | 1                 |
| N0151     | Arthr.+oth.viral dis-shoulder     | 1                 |
| N0140     | Arthr.+oth.bact.dis-site unsp.    | 1                 |
| N0141     | Arthr.+oth.bact.dis-shoulder      | 1                 |
| N014y     | Arthr.+oth.bact.dis-other spec    | 1                 |
| N014x     | Arthr.+oth.bact.dis-mult.sites    | 1                 |
| N014z     | Arthr.+oth.bact. disease NOS      | 1                 |
| N0160     | Arthr.+mycoses-site unspecif.     | 1                 |
| N0161     | Arthr.+mycoses-shoulder region    | 1                 |
| N016y     | Arthr.+mycoses-other specified    | 1                 |
| N016x     | Arthr.+mycoses-multiple sites     | 1                 |
| N0170     | Arthr.+helminth.-site unspec.     | 1                 |
| N0171     | Arthr.+helminth.-shoulder regn    | 1                 |
| N017y     | Arthr.+helminth.-other specif.    | 1                 |
| N017x     | Arthr.+helminth.-multiple site    | 1                 |
| N015y     | Arthr+oth.viral dis-other spec    | 1                 |
| N015x     | Arthr+oth.viral dis-mult.sites    | 1                 |
| N03x0     | Arthr assoc oth dis-shoulder      | 1                 |
| N03xB     | Arthr assoc oth dis-knee          | 1                 |
| N03x1     | Arthr ass oth dis-sternoclav j    | 1                 |
| N03x2     | Arthr ass oth dis-acromioclav j   | 1                 |
| N01yz     | Arth+other infect./parasit.NOS    | 1                 |
| N01y0     | Arth+oth.inf/para-site unspec.    | 1                 |
| N01y1     | Arth+oth.inf/para-shoulder reg    | 1                 |
| N01yy     | Arth+oth.inf/para-other specif    | 1                 |
| N01yx     | Arth+oth.inf/para-multipl.site    | 1                 |
| N245-2    | Arm pain                          | 1                 |
| N32z0     | Apophysitis NOS                   | 1                 |
| N006      | Antiphospholipid syndrome         | 1                 |
| 1M12      | Anterior knee pain                | 1                 |
| N094W     | Anterior knee pain                | 1                 |

| Read code | Description                      | Number of studies |
|-----------|----------------------------------|-------------------|
| S4101     | Anterior dislocation of shoulder | 1                 |
| N12z9     | Annular tear of thoracic disc    | 1                 |
| N12zD     | Annular tear of lumbar disc      | 1                 |
| N12z5     | Annular tear of cervical disc    | 1                 |
| N148      | Ankylosis/instab Cx,Th,Lu spin   | 1                 |
| N085B     | Ankylosis other joint-shoulder   | 1                 |
| N085P     | Ankylosis of the knee joint      | 1                 |
| N085A     | Ankylosis of shoulder joint      | 1                 |
| N0859     | Ankylosis of multiple joints     | 1                 |
| N085z     | Ankylosis of joint NOS           | 1                 |
| N085      | Ankylosis of joint               | 1                 |
| N117      | Ankylosing verteb.hyperostosis   | 1                 |
| N100*     | Ankylosing spondylitis           | 1                 |
| N100      | Ankylosing spondylitis           | 1                 |
| N245-1    | Ankle pain                       | 1                 |
| 1M13      | Ankle pain                       | 1                 |
| N05z7-1   | Ankle osteoarthritis NOS         | 1                 |
| N3384     | Angular mal-union of fracture    | 1                 |
| N3322     | Aneurysmal bone cyst             | 1                 |
| N2320     | Amyotrophia NOS                  | 1                 |
| N0620     | Allergic arthritis-site unsp.    | 1                 |
| N0621     | Allergic arthritis-shoulder      | 1                 |
| N0628     | Allergic arthritis-other spec.   | 1                 |
| N0629     | Allergic arthritis-multip.site   | 1                 |
| N062z     | Allergic arthritis-NOS           | 1                 |
| N062      | Allergic arthritis               | 1                 |
| N337z     | Algoneurodystrophy NOS           | 1                 |
| N3373     | Algodystrophy of knee            | 1                 |
| N04y2     | Adult-onset Still's disease      | 1                 |
| N32y0     | Adult osteochondrosis of spine   | 1                 |
| N005      | Adult Still's Disease            | 1                 |
| N370      | Adolescent postural kyphosis     | 1                 |
| N3737     | Adolescent idiopath scoliosis    | 1                 |
| N210      | Adhesive capsulitis - shoulde    | 1                 |
| N2156     | Adductor tendinitis              | 1                 |
| N084D     | Adduction contracture-shoulder   | 1                 |
| N0431     | Acute polyartic.juvenile R.A.    | 1                 |
| N300B     | Acute osteomyelitis-thor spine   | 1                 |
| N3000     | Acute osteomyelitis-site unsp.   | 1                 |
| N3001     | Acute osteomyelitis-shoulder     | 1                 |
| N300G     | Acute osteomyelitis-scapula      | 1                 |
| N300R     | Acute osteomyelitis-patella      | 1                 |
| N3008     | Acute osteomyelitis-other spec   | 1                 |
| N3009     | Acute osteomyelitis-mult.site    | 1                 |
| N300C     | Acute osteomyelitis-lumb spine   | 1                 |
| N300F     | Acute osteomyelitis-clavicle     | 1                 |
| N300A     | Acute osteomyelitis-cerv spine   | 1                 |
| N300z     | Acute osteomyelitis NOS          | 1                 |
| N300      | Acute osteomyelitis              | 1                 |
| S460      | Acute meniscal tear medial       | 1                 |
| S461      | Acute meniscal tear lateral      | 1                 |
| N090Y     | Acute joint effusion             | 1                 |
| N300Z     | Acute haematogen osteomyelitis   | 1                 |

1  
2  
3  
4  
5  
6  
7  
8  
9  
10  
11  
12  
13  
14  
15  
16  
17  
18  
19  
20  
21  
22  
23  
24  
25  
26  
27  
28  
29  
30  
31  
32  
33  
34  
35  
36  
37  
38  
39  
40  
41  
42  
43  
44  
45  
46  
47  
48  
49  
50  
51  
52  
53  
54  
55  
56  
57  
58  
59  
60

| Read code | Description                    | Number of studies |
|-----------|--------------------------------|-------------------|
| N145      | Acute back pain - unspecified  | 1                 |
| N145-1    | Acute back pain - unspecified  | 1                 |
| N141      | Acute back pain - thoracic     | 1                 |
| N141-1    | Acute back pain - thoracic     | 1                 |
| N142      | Acute back pain - lumbar       | 1                 |
| N142-3    | Acute back pain - lumbar       | 1                 |
| N12       | Acute back pain - disc         | 1                 |
| N143-1    | Acute back pain + sciatica     | 1                 |
| N06zA     | Acute arthritis                | 1                 |
| EGTONAC1  | Acromio-Clavicular Dislocation | 1                 |
| N384      | Acquired spondylolisthesis     | 1                 |
| N3720     | Acquired postural lordosis     | 1                 |
| N3710     | Acquired postural kyphosis     | 1                 |
| N372z     | Acquired lordosis NOS          | 1                 |
| N372      | Acquired lordosis              | 1                 |
| N371z     | Acquired kyphosis NOS          | 1                 |
| N371      | Acquired kyphosis              | 1                 |
| N366      | Acquired knee deformity NOS    | 1                 |
| N37z0     | Acquired hunchback             | 1                 |
| N3641     | Acquired genu varum            | 1                 |
| N364z     | Acquired genu valgum/varum NOS | 1                 |
| N364      | Acquired genu valgum/varum     | 1                 |
| N3640     | Acquired genu valgum           | 1                 |
| N385      | Acquired deformity spine NOS   | 1                 |
| N382      | Acquired deformity of neck     | 1                 |
| N38z      | Acquired deformity NOS         | 1                 |
| N38y0     | Acquired clavicle deformity    | 1                 |
| 1DCC.00   | Aching muscles                 | 1                 |
| 1DCC      | Aching muscles                 | 1                 |
| N220H     | Achilles tenosynovitis         | 1                 |
| N2174     | Achilles tendinitis            | 1                 |
| N094-1    | Ache in joint                  | 1                 |
| S4604     | Ac mnscl tr,med,periph,dtchmt  | 1                 |
| S4614     | Ac mnscl tr,lat,periph,dtchmt  | 1                 |
| S4605     | Ac mnscl tear,med,horiz clvge  | 1                 |
| S4615     | Ac mnscl tear,lat,horiz clvge  | 1                 |
| S4602     | Ac menscl tear,med,bckt hndle  | 1                 |
| S4612     | Ac menscl tear,lat,bckt hndle  | 1                 |
| S4603     | Ac meniscal tear,med,radial    | 1                 |
| S4601     | Ac meniscal tear,med,post horn | 1                 |
| S4600     | Ac meniscal tear,med,ant horn  | 1                 |
| S4613     | Ac meniscal tear,lat,radial    | 1                 |
| S4611     | Ac meniscal tear,lat,post horn | 1                 |
| S4610     | Ac meniscal tear,lat,ant horn  | 1                 |
| N22y2     | Abscess of tendon              | 1                 |
| N22yE     | Abscess of bursa-shoulder      | 1                 |
| N22yJ     | Abscess of bursa-knee          | 1                 |
| N22y3     | Abscess of bursa               | 1                 |
| SD        | Abrasions                      | 1                 |
| N084C     | Abduction contracture-shoulder | 1                 |
| 1969.00   | Abdominal pain                 | 1                 |
| EGTON251  | ? Frozen Right Shoulder        | 1                 |
| N11C1     | 2 lev lumbsac spond+radiculop  | 1                 |

| Read code | Description                    | Number of studies |
|-----------|--------------------------------|-------------------|
| N11C0     | 1 lev lumbsac spond+radiculop  | 1                 |
| HNG0160   | (hn) Sports Injury             | 1                 |
| HNG0157   | (hn) Spinal Injury             | 1                 |
| HNG0162   | (hn) Soft tissue injuries      | 1                 |
| HNG0163   | (hn) Rhematic problems         | 1                 |
| S11       | #Vertebra + cord lesion        | 1                 |
| S10z      | #Spine - no cord lesion - NOS  | 1                 |
| S10       | #Spine - no cord lesion        | 1                 |
| S11z      | #Spine + cord lesion NOS       | 1                 |
| S21z      | #Scapula NOS                   | 1                 |
| S21       | #Scapula                       | 1                 |
| S32z      | #Patella NOS                   | 1                 |
| S104      | #Lumbar spine - no cord lesion | 1                 |
| S32       | #Knee-cap                      | 1                 |
| S20z      | #Clavicle NOS                  | 1                 |
| S20       | #Clavicle                      | 1                 |
| S3zz      | #Bones NOS                     | 1                 |
| S4F       | #-dslc/subluxation knee        | 1                 |
| S4A       | #-dslc or subluxation shoulder | 1                 |

**Table 7. List of Read codes used in the studies of male sexual dysfunction.**

| Read code | Description                                      | Number of studies |
|-----------|--------------------------------------------------|-------------------|
| E227311   | Erectile dysfunction                             | 3                 |
| K27y100   | Impotence of organic origin                      | 2                 |
| E227300   | Impotence                                        | 2                 |
| Eu52213   | [X]Psychogenic impotence                         | 1                 |
| Eu52212   | [X]Male erectile disorder                        | 1                 |
| E227000   | Unspecified psychosexual dysfunction             | 1                 |
| 7C25E00   | Treatment of erectile dysfunction NEC            | 1                 |
| 7A6G000   | Revascularisation for impotence                  | 1                 |
| 8IE8.00   | Referral to erectile dysfunction clinic declined | 1                 |
| 8HTj.00   | Referral to erectile dysfunction clinic          | 1                 |
| E227z00   | Psychosexual dysfunction NOS                     | 1                 |
| E227.00   | Psychosexual dysfunction                         | 1                 |
| E227700   | Psychogenic dyspareunia                          | 1                 |
| Z9E9.00   | Provision of device for impotence                | 1                 |
| E227600   | Premature ejaculation                            | 1                 |
| 7C25F00   | Operations on penis for erectile dysfunction NEC | 1                 |
| 7A6G500   | Ligation of penile veins for impotence           | 1                 |
| E227.11   | Lack of libido                                   | 1                 |
| E227100   | Inhibited sexual desire                          | 1                 |
| E227500   | Inhibited male orgasm                            | 1                 |
| E227z11   | Fear of ejaculation                              | 1                 |
| K27y700   | Erectile dysfunction due to diabetes mellitus    | 1                 |
| 66Au.00   | Diabetic erectile dysfunction review             | 1                 |
| 66Av.00   | Diabetic assessment of erectile dysfunction      | 1                 |
| 1D1B.00   | C/O erectile dysfunction                         | 1                 |
| ZG43600   | Advice on technique for impotence                | 1                 |
| 67IA.00   | Advice about impotence                           | 1                 |

**Table 8. List of Read codes used in the studies of sleep disorder.**

| Read code | Description                                       | Number of studies |
|-----------|---------------------------------------------------|-------------------|
| 1B1B.00   | Cannot sleep - insomnia                           | 1                 |
| 1B1B.11   | C/O - insomnia                                    | 1                 |
| 1B1B100   | Middle insomnia                                   | 1                 |
| 1B1B200   | Late insomnia                                     | 1                 |
| 1B1Q.00   | Poor sleep pattern                                | 1                 |
| E274.00   | Non-organic sleep disorders                       | 1                 |
| E274.11   | Hypersomnia of non-organic origin                 | 1                 |
| E274.12   | Insomnia due to nonorganic sleep disorder         | 1                 |
| E274000   | Unspecified non-organic sleep disorder            | 1                 |
| E274100   | Transient insomnia                                | 1                 |
| E274111   | Insomnia NOS                                      | 1                 |
| E274200   | Persistent insomnia                               | 1                 |
| E274300   | Transient hypersomnia                             | 1                 |
| E274311   | Hypersomnia NOS                                   | 1                 |
| E274400   | Persistent hypersomnia                            | 1                 |
| E274500   | Jet lag syndrome                                  | 1                 |
| E274600   | Shifting sleep-work schedule                      | 1                 |
| E274700   | Somnambulism - sleep walking                      | 1                 |
| E274800   | Night terrors                                     | 1                 |
| E274900   | Nightmares                                        | 1                 |
| E274A00   | Sleep drunkenness                                 | 1                 |
| E274B00   | Repeated rapid eye movement sleep interruptions   | 1                 |
| E274C00   | Other sleep stage or arousal dysfunction          | 1                 |
| E274D00   | Repetitive intrusions of sleep                    | 1                 |
| E274D11   | Restless sleep                                    | 1                 |
| E274E00   | 'Short-sleeper'                                   | 1                 |
| E274F00   | Inversion of sleep rhythm                         | 1                 |
| E274y00   | Other non-organic sleep disorder                  | 1                 |
| E274y11   | Dreams                                            | 1                 |
| E274z00   | Non-organic sleep disorder NOS                    | 1                 |
| Eu51.00   | [X]Nonorganic sleep disorders                     | 1                 |
| Eu51000   | [X]Nonorganic insomnia                            | 1                 |
| Eu51100   | [X]Nonorganic hypersomnia                         | 1                 |
| Eu51200   | [X]Nonorganic disorder of the sleep-wake schedule | 1                 |
| Fy00.00   | Disorders of initiating and maintaining sleep     | 1                 |
| Fy01.00   | Disorders of excessive somnolence                 | 1                 |
| Fy02.00   | Disorders of the sleep-wake schedule              | 1                 |
| R005.00   | [D]Sleep disturbances                             | 1                 |
| R005.11   | [D]Insomnia - symptom                             | 1                 |
| R005.12   | [D]Sleep rhythm problems                          | 1                 |
| R005000   | [D]Sleep disturbance, unspecified                 | 1                 |
| R005100   | [D]Insomnia with sleep apnoea                     | 1                 |
| R005200   | [D]Insomnia NOS                                   | 1                 |
| R005300   | [D]Hypersomnia with sleep apnoea                  | 1                 |
| R005311   | [D]Sleep apnoea syndrome                          | 1                 |
| R005312   | [D]Syndrome sleep apnoea                          | 1                 |
| R005400   | [D]Hypersomnia NOS                                | 1                 |
| R005500   | [D]Sleep rhythm inversion                         | 1                 |
| R005600   | [D]Sleep rhythm irregular                         | 1                 |
| R005700   | [D]Sleep-wake rhythm non-24-hour cycle            | 1                 |
| R005800   | [D]Sleep dysfunction with sleep stage disturbance | 1                 |

| Read code | Description                                   | Number of studies |
|-----------|-----------------------------------------------|-------------------|
| R005900   | [D]Sleep dysfunction with arousal disturbance | 1                 |
| R005z00   | [D]Sleep dysfunction NOS                      | 1                 |

For peer review only

**Table 9. List of Read codes used in the studies of fatal and non-fatal self-harm.**

| Read code | Description                                                  | Number of studies |
|-----------|--------------------------------------------------------------|-------------------|
| TK1y.00   | Suicide and selfinflicted poisoning by other utility gas     | 8                 |
| TK21.00   | Suicide and selfinflicted poisoning by other carbon monoxide | 8                 |
| TK01000   | Suicide and self inflicted injury by Amylobarbitone          | 8                 |
| TK03.00   | Suicide + selfinflicted poisoning tranquilliser/psychotropic | 8                 |
| TK0z.00   | Suicide + selfinflicted poisoning by solid/liquid subst NOS  | 8                 |
| TK04.00   | Suicide + selfinflicted poisoning by other drugs/medicines   | 8                 |
| TK02.00   | Suicide + selfinflicted poisoning by oth sedatives/hypnotics | 8                 |
| TK20.00   | Suicide + selfinflicted poisoning by motor veh exhaust gas   | 8                 |
| TK05.00   | Suicide + selfinflicted poisoning by drug or medicine NOS    | 8                 |
| TK07.00   | Suicide + selfinflicted poisoning by corrosive/caustic subst | 8                 |
| TK01.00   | Suicide + selfinflicted poisoning by barbiturates            | 8                 |
| TK00.00   | Suicide + selfinflicted poisoning by analgesic/antipyretic   | 8                 |
| TK06.00   | Suicide + selfinflicted poisoning by agricultural chemical   | 8                 |
| U200.00   | [X]Intent self poison/exposure to nonopioid analgesic        | 7                 |
| U20..11   | [X]Deliberate drug overdose / other poisoning                | 7                 |
| TK70.00   | Suicide+selfinflicted injury-jump from residential premises  | 7                 |
| TK71.00   | Suicide+selfinflicted injury-jump from oth manmade structure | 7                 |
| TK72.00   | Suicide+selfinflicted injury-jump from natural sites         | 7                 |
| TK7z.00   | Suicide+selfinflicted injury-jump from high place NOS        | 7                 |
| TK61.00   | Suicide and selfinflicted injury by stabbing                 | 7                 |
| TK51.00   | Suicide and selfinflicted injury by shotgun                  | 7                 |
| TKx2.00   | Suicide and selfinflicted injury by scald                    | 7                 |
| TKxy.00   | Suicide and selfinflicted injury by other specified means    | 7                 |
| TK54.00   | Suicide and selfinflicted injury by other firearm            | 7                 |
| TK52.00   | Suicide and selfinflicted injury by hunting rifle            | 7                 |
| TK30.00   | Suicide and selfinflicted injury by hanging                  | 7                 |
| TK6z.00   | Suicide and selfinflicted injury by cutting and stabbing NOS | 7                 |
| TK60.00   | Suicide and selfinflicted injury by cutting                  | 7                 |
| TKx5.00   | Suicide and selfinflicted injury by crashing motor vehicle   | 7                 |
| TKx1.00   | Suicide and selfinflicted injury by burns or fire            | 7                 |
| TK...00   | Suicide and selfinflicted injury                             | 7                 |
| TK01400   | Suicide and self inflicted injury by Phenobarbitone          | 7                 |
| TK01100   | Suicide and self inflicted injury by Barbitone               | 7                 |
| TK...14   | Suicide and self harm                                        | 7                 |
| TK0..00   | Suicide + selfinflicted poisoning by solid/liquid substances | 7                 |
| TK2..00   | Suicide + selfinflicted poisoning by other gases and vapours | 7                 |
| TK11.00   | Suicide + selfinflicted poisoning by liquified petrol gas    | 7                 |
| TK2z.00   | Suicide + selfinflicted poisoning by gases and vapours NOS   | 7                 |
| TK10.00   | Suicide + selfinflicted poisoning by gas via pipeline        | 7                 |
| TK1z.00   | Suicide + selfinflicted poisoning by domestic gases NOS      | 7                 |
| TKx0000   | Suicide + selfinflicted injury-jumping before moving object  | 7                 |
| TK31.00   | Suicide + selfinflicted injury by suffocation by plastic bag | 7                 |
| TK3y.00   | Suicide + selfinflicted inj oth mean hang/strangle/suffocate | 7                 |
| TK3z.00   | Suicide + selfinflicted inj by hang/strangle/suffocate NOS   | 7                 |
| TK...13   | Poisoning - self-inflicted                                   | 7                 |
| TK...17   | Para-suicide                                                 | 7                 |
| TK...11   | Cause of overdose - deliberate                               | 7                 |
| TK...15   | Attempted suicide                                            | 7                 |
| U2...13   | [X]Suicide                                                   | 6                 |
| U20C.11   | [X]Self poisoning with weedkiller                            | 6                 |
| U20C.12   | [X]Self poisoning with paraquat                              | 6                 |



1  
2  
3  
4  
5  
6  
7  
8  
9  
10  
11  
12  
13  
14  
15  
16  
17  
18  
19  
20  
21  
22  
23  
24  
25  
26  
27  
28  
29  
30  
31  
32  
33  
34  
35  
36  
37  
38  
39  
40  
41  
42  
43  
44  
45  
46  
47  
48  
49  
50  
51  
52  
53  
54  
55  
56  
57  
58  
59  
60

| Read code | Description                                                  | Number of studies |
|-----------|--------------------------------------------------------------|-------------------|
| U20A.11   | [X]Self poisoning from glue solvent                          | 6                 |
| U20B.11   | [X]Self carbon monoxide poisoning                            | 6                 |
| U2...15   | [X]Para-suicide                                              | 6                 |
| U20..00   | [X]Intentional self poisoning/exposure to noxious substances | 6                 |
| U20A.00   | [X]Intentional self poison organ solvent,halogen hydrocarb   | 6                 |
| U20y.00   | [X]Intent self poison/exposure to unspecif chemical          | 6                 |
| U202.00   | [X]Intent self poison/exposure to sedative hypnotic          | 6                 |
| U204.00   | [X]Intent self poison/exposure to psychotropic drug          | 6                 |
| U20C.00   | [X]Intent self poison/exposure to pesticide                  | 6                 |
| U20B.00   | [X]Intent self poison/exposure to other gas/vapour           | 6                 |
| U207.00   | [X]Intent self poison/exposure to oth autonomic drug         | 6                 |
| U206.00   | [X]Intent self poison/exposure to hallucinogen               | 6                 |
| U201.00   | [X]Intent self poison/exposure to antiepileptic              | 6                 |
| U20yz00   | [X]Intent self poison unspecif chemical unspecif place       | 6                 |
| U202z00   | [X]Intent self poison sedative hypnotic unspecif place       | 6                 |
| U204z00   | [X]Intent self poison psychotropic drug unspecif place       | 6                 |
| U204100   | [X]Intent self poison psychotropic drug at res institut      | 6                 |
| U20Bz00   | [X]Intent self poison other gas/vapour unspecif place        | 6                 |
| U208z00   | [X]Intent self poison oth/unsp drug/medic unspecif place     | 6                 |
| U207z00   | [X]Intent self poison oth autonomic drug unspecif place      | 6                 |
| U200z00   | [X]Intent self poison nonopioid analgesic unspecif place     | 6                 |
| U200100   | [X]Intent self poison nonopioid analgesic at res institut    | 6                 |
| U205z00   | [X]Intent self poison narcotic drug unspecif place           | 6                 |
| U201z00   | [X]Intent self poison antiepileptic unspecif place           | 6                 |
| U206400   | [X]Intent self pois hallucinogen in street/highway           | 6                 |
| U20y000   | [X]Int self poison/exposure to unspecif chemical at home     | 6                 |
| U202000   | [X]Int self poison/exposure to sedative hypnotic at home     | 6                 |
| U204000   | [X]Int self poison/exposure to psychotropic drug at home     | 6                 |
| U20C000   | [X]Int self poison/exposure to pesticide at home             | 6                 |
| U208.00   | [X]Int self poison/exposure to other/unspec drug/medicament  | 6                 |
| U20B000   | [X]Int self poison/exposure to other gas/vapour at home      | 6                 |
| U207000   | [X]Int self poison/exposure to oth autonomic drug at home    | 6                 |
| U200000   | [X]Int self poison/exposure to nonopioid analgesic at home   | 6                 |
| U205000   | [X]Int self poison/exposure to narcotic drug at home         | 6                 |
| U201000   | [X]Int self poison/exposure to antiepileptic at home         | 6                 |
| U20y200   | [X]Int self poison unspecif chemical school/pub admin area   | 6                 |
| U202y00   | [X]Int self poison sedative hypnotic other spec place        | 6                 |
| U204y00   | [X]Int self poison psychotropic drug other spec place        | 6                 |
| U20Cy00   | [X]Int self poison pesticide other spec place                | 6                 |
| U20B200   | [X]Int self poison other gas/vapour school/pub admin area    | 6                 |
| U20By00   | [X]Int self poison other gas/vapour other spec place         | 6                 |
| U208y00   | [X]Int self poison oth/unsp drug/medic other spec place      | 6                 |
| U20A400   | [X]Int self poison org solvent,halogen hydrocarb,in highway  | 6                 |
| U200y00   | [X]Int self poison nonopioid analgesic other spec place      | 6                 |
| U205y00   | [X]Int self poison narcotic drug other spec place            | 6                 |
| U2...14   | [X]Attempted suicide                                         | 6                 |
| TKx7.00   | Suicide and selfinflicted injury caustic subst, excl poison  | 6                 |
| TKxz.00   | Suicide and selfinflicted injury by other means NOS          | 6                 |
| TKx..00   | Suicide and selfinflicted injury by other means              | 6                 |
| TK7..00   | Suicide and selfinflicted injury by jumping from high place  | 6                 |
| TKx3.00   | Suicide and selfinflicted injury by extremes of cold         | 6                 |
| TKx4.00   | Suicide and selfinflicted injury by electrocution            | 6                 |
| TK4..00   | Suicide and selfinflicted injury by drowning                 | 6                 |

| Read code | Description                                                  | Number of studies |
|-----------|--------------------------------------------------------------|-------------------|
| TK6..00   | Suicide and selfinflicted injury by cutting and stabbing     | 6                 |
| TKz..00   | Suicide and selfinflicted injury NOS                         | 6                 |
| TK1..00   | Suicide + selfinflicted poisoning by gases in domestic use   | 6                 |
| TKx0.00   | Suicide + selfinflicted injury-jump/lie before moving object | 6                 |
| TK3..00   | Suicide + selfinflicted injury by hang/strangulate/suffocate | 6                 |
| U2y0.00   | [X]Intentionl self harm by oth specif means occurrn at home  | 5                 |
| U2z0.00   | [X]Intentional self harm by unspecif means occurrn at home   | 5                 |
| U290.00   | [X]Intentional self harm by sharp object occurrence at home  | 5                 |
| U29z.00   | [X]Intentional self harm by sharp object occ unspecif place  | 5                 |
| U2A0.00   | [X]Intentional self harm by blunt object occurrence at home  | 5                 |
| U270.00   | [X]Intention self harm by smoke fire/flames occurrn at home  | 5                 |
| U294.00   | [X]Intention self harm by sharp object occ street/highway    | 5                 |
| U29y.00   | [X]Intention self harm by sharp object occ oth specif place  | 5                 |
| U205.00   | [X]Intent self poison/exposure to narcotic drug              | 5                 |
| U209.00   | [X]Intent self poison/exposure to alcohol                    | 5                 |
| U209z00   | [X]Intent self poison alcohol unspecif place                 | 5                 |
| U202400   | [X]Intent self pois sedative hypnotic in street/highway      | 5                 |
| U208400   | [X]Intent self pois oth/unsp drug/medic in street/highway    | 5                 |
| U20A000   | [X]Intent self pois organ solvent,halogen hydrocarb, home    | 5                 |
| U200500   | [X]Intent self pois nonopioid analgesic trade/service area   | 5                 |
| U250.00   | [X]Intent self harm oth/unspecif firearm disch occ at home   | 5                 |
| U2D6.00   | [X]Intent self harm crash motor vehic occ indust/constr area | 5                 |
| U2zy.00   | [X]Intent self harm by unspecif means occ oth specif place   | 5                 |
| U2zz.00   | [X]Intent self harm by unspecif means occ at unspecif place  | 5                 |
| U2z2.00   | [X]Intent self harm by unspec mean occ sch/ins/pub adm area  | 5                 |
| U27z.00   | [X]Intent self harm by smoke fire/flames occ unspecif place  | 5                 |
| U274.00   | [X]Intent self harm by smoke fire/flame occ street/highway   | 5                 |
| U291.00   | [X]Intent self harm by sharp object occ resident instit'n    | 5                 |
| U2yz.00   | [X]Intent self harm by oth specif means occ unspecif place   | 5                 |
| U2y1.00   | [X]Intent self harm by oth specif means occ resid instit'n   | 5                 |
| U2B0.00   | [X]Intent self harm by jumping from high place occ at home   | 5                 |
| U2B4.00   | [X]Intent self harm by jump from high place occ street/h'way | 5                 |
| U211.00   | [X]Intent self harm by hangng strangult/suffoct resid instit | 5                 |
| U21z.00   | [X]Intent self harm by hangng strangul/suffoct unspecif plce | 5                 |
| U21y.00   | [X]Intent self harm by hangng strangul/suffoct oth spec plce | 5                 |
| U210.00   | [X]Intent self harm by hanging strangulat/suffocat occ home  | 5                 |
| U221.00   | [X]Intent self harm by drowning/submersn occ resid instit'n  | 5                 |
| U22z.00   | [X]Intent self harm by drown/submersn occ unspecified place  | 5                 |
| U22y.00   | [X]Intent self harm by drown/submersn occ oth specif place   | 5                 |
| U2D0.00   | [X]Intent self harm by crash of motor vehicl occurrn at home | 5                 |
| U2D4.00   | [X]Intent self harm by crash motor vehicl occ street/highway | 5                 |
| U2A3.00   | [X]Intent self harm by blunt object occ sports/athlet area   | 5                 |
| U2A1.00   | [X]Intent self harm by blunt object occ resident instit'n    | 5                 |
| U242.00   | [X]Int slf hrm rifl s'gun/lrg frarm dis sch/ins/pub adm area | 5                 |
| U208000   | [X]Int self poison/exposure to oth/unsp drug/medicam home    | 5                 |
| U209y00   | [X]Int self poison alcohol other spec place                  | 5                 |
| U20Az00   | [X]Int self pois org solv,halogen hydrocarb, unspec place    | 5                 |
| U241.00   | [X]Int self harm rifl s'gun/lrg frarm disch occ resid instit | 5                 |
| U2C4.00   | [X]Int self harm jump/lying befr mov obje occ street/highway | 5                 |
| U2C1.00   | [X]Int self harm jump/lying befr mov obje occ resid instit'n | 5                 |
| U2Cy.00   | [X]Int self harm jump/lying bef mov obje occ oth specif plce | 5                 |
| U2Bz.00   | [X]Int self harm by jump from high place occ unspecif place  | 5                 |
| U2By.00   | [X]Int self harm by jump from high place occ oth specif plce | 5                 |

1  
2  
3  
4  
5  
6  
7  
8  
9  
10  
11  
12  
13  
14  
15  
16  
17  
18  
19  
20  
21  
22  
23  
24  
25  
26  
27  
28  
29  
30  
31  
32  
33  
34  
35  
36  
37  
38  
39  
40  
41  
42  
43  
44  
45  
46  
47  
48  
49  
50  
51  
52  
53  
54  
55  
56  
57  
58  
59  
60

| Read code | Description                                                  | Number of studies |
|-----------|--------------------------------------------------------------|-------------------|
| U2B6.00   | [X]Int self harm by jump from high place indust/constr area  | 5                 |
| TK5z.00   | Suicide and selfinflicted injury by firearms/explosives NOS  | 5                 |
| TK5..00   | Suicide and selfinflicted injury by firearms and explosives  | 5                 |
| TKx6.00   | Suicide and selfinflicted injury by crashing of aircraft     | 5                 |
| TK60111   | Slashed wrists self inflicted                                | 5                 |
| TK60100   | Self inflicted lacerations to wrist                          | 5                 |
| U202.13   | [X]Overdose - temazepam                                      | 4                 |
| U202.11   | [X]Overdose - sleeping tabs                                  | 4                 |
| U202.15   | [X]Overdose - nitrazepam                                     | 4                 |
| U202.12   | [X]Overdose - diazepam                                       | 4                 |
| U202.16   | [X]Overdose - benzodiazepine                                 | 4                 |
| U202.17   | [X]Overdose - barbiturate                                    | 4                 |
| U204.11   | [X]Overdose - antidepressant                                 | 4                 |
| U202.18   | [X]Overdose - amobarbital                                    | 4                 |
| U204.12   | [X]Overdose - amitriptyline                                  | 4                 |
| U204.13   | [X]Overdose - SSRI                                           | 4                 |
| U2z..00   | [X]Intentional self harm by unspecified means                | 4                 |
| U27..00   | [X]Intentional self harm by smoke, fire and flames           | 4                 |
| U29..00   | [X]Intentional self harm by sharp object                     | 4                 |
| U2y..00   | [X]Intentional self harm by other specified means            | 4                 |
| U2B..00   | [X]Intentional self harm by jumping from a high place        | 4                 |
| U26..00   | [X]Intentional self harm by explosive material               | 4                 |
| U22..00   | [X]Intentional self harm by drowning and submersion          | 4                 |
| U2D..00   | [X]Intentional self harm by crashing of motor vehicle        | 4                 |
| U2A..00   | [X]Intentional self harm by blunt object                     | 4                 |
| U200400   | [X]Intent self pois nonopioid analgesic in street/highway    | 4                 |
| U28z.00   | [X]Intent self harm by steam hot vapour/obj occ unspec place | 4                 |
| U280.00   | [X]Intent self harm by steam hot vapour/hot obj occ at home  | 4                 |
| U24..00   | [X]Intent self harm by rifle shotgun/larger firearm disch    | 4                 |
| U25..00   | [X]Intent self harm by other/unspecified firearm discharge   | 4                 |
| U2C..00   | [X]Intent self harm by jumping / lying before moving object  | 4                 |
| U21..00   | [X]Intent self harm by hanging strangulation / suffocation   | 4                 |
| U212.00   | [X]Inten slf harm hang strang/suffc sch oth ins/pub adm area | 4                 |
| U209000   | [X]Int self poison/exposure to alcohol at home               | 4                 |
| U41..00   | [X]Hanging strangulation + suffocation undetermined intent   | 4                 |
| U4Bz.00   | [X]Fall jump/push frm high plce undt intnt occ unspecif plce | 4                 |
| U720.00   | [X]Sequelae of intentional self-harm                         | 3                 |
| U2...11   | [X]Self inflicted injury                                     | 3                 |
| U44..00   | [X]Rifle shotgun+larger firearm discharge undetermin intent  | 3                 |
| U40y.00   | [X]Poisoning/exposure, ? intent, to unspecif chemical        | 3                 |
| U402.00   | [X]Poisoning/exposure, ? intent, to sedative hypnotic        | 3                 |
| U404.00   | [X]Poisoning/exposure, ? intent, to psychotropic drug        | 3                 |
| U40C.00   | [X]Poisoning/exposure, ? intent, to pesticide                | 3                 |
| U40B.00   | [X]Poisoning/exposure, ? intent, to other gas/vapour         | 3                 |
| U400.00   | [X]Poisoning/exposure, ? intent, to nonopioid analgesic      | 3                 |
| U405.00   | [X]Poisoning/exposure, ? intent, to narcotic drug            | 3                 |
| U409.00   | [X]Poisoning/exposure, ? intent, to alcohol                  | 3                 |
| U40..00   | [X]Poisoning/expos to noxious substance,undetermined intent  | 3                 |
| U408.00   | [X]Poison/exposure, ?intent, to other/unspec drug/medicament | 3                 |
| U408000   | [X]Poison/exposure ?intent, to oth/unsp drug/medicam home    | 3                 |
| U409000   | [X]Poison/exposure ?intent, to alcohol at home               | 3                 |
| U40y600   | [X]Poison/expos ?intent unspec chemic indust/construct area  | 3                 |
| U200.11   | [X]Overdose - paracetamol                                    | 3                 |

| Read code | Description                                                    | Number of studies |
|-----------|----------------------------------------------------------------|-------------------|
| U200.12   | [X]Overdose - ibuprofen                                        | 3                 |
| U200.13   | [X]Overdose - aspirin                                          | 3                 |
| U45..00   | [X]Other+unspecified firearm discharge undetermined intent     | 3                 |
| U2...00   | [X]Intentional self-harm                                       | 3                 |
| U28..00   | [X]Intentional self harm by steam hot vapours / hot objects    | 3                 |
| U216.00   | [X]Intent self harm by hang strangl/suffc indust/constr area   | 3                 |
| U220.00   | [X]Intent self harm by drowning/submersion occurrn at home     | 3                 |
| U206000   | [X]Int self poison/exposure to hallucinogen at home            | 3                 |
| U2...12   | [X]Injury - self-inflicted                                     | 3                 |
| U410.00   | [X]Hanging strangulat+suffocat undet intent occurrn at home    | 3                 |
| U4B..00   | [X]Falling jumping/pushed from high place undeterm intent      | 3                 |
| U30..11   | [X]Deliberate drug poisoning                                   | 3                 |
| ZX1R.00   | Throwing self in front of vehicle                              | 3                 |
| ZX1Q.00   | Throwing self in front of train                                | 3                 |
| TK53.00   | Suicide and selfinflicted injury by military firearms          | 3                 |
| TK01z00   | Suicide and self inflicted injury by barbiturates              | 3                 |
| TK2y.00   | Suicide + selfinflicted poisoning by other gases and vapours   | 3                 |
| TKx0z00   | Suicide + selfinflicted inj-jump/lie before moving obj NOS     | 3                 |
| ZX1N.00   | Stabbing self                                                  | 3                 |
| ZX1M.00   | Shooting self                                                  | 3                 |
| ZX1K.12   | Setting self alight                                            | 3                 |
| ZX1K.11   | Setting fire to self                                           | 3                 |
| ZX1H200   | Self-suffocation                                               | 3                 |
| ZX1H100   | Self-strangulation                                             | 3                 |
| ZX1K.00   | Self-incineration                                              | 3                 |
| ZX1J.00   | Self-electrocution                                             | 3                 |
| ZX1H.00   | Self-asphyxiation                                              | 3                 |
| SL...15   | Overdose of drug                                               | 3                 |
| SL...14   | Overdose of biological substance                               | 3                 |
| TKy..00   | Late effects of selfinflicted injury                           | 3                 |
| ZX1Q.11   | Jumping under train                                            | 3                 |
| ZX1B.00   | Jumping from height                                            | 3                 |
| ZX1B300   | Jumping from cliff                                             | 3                 |
| ZX1B100   | Jumping from building                                          | 3                 |
| ZX1B200   | Jumping from bridge                                            | 3                 |
| TK...12   | Injury - self-inflicted                                        | 3                 |
| ZX18.00   | Hanging self                                                   | 3                 |
| SLHz.00   | Drug and medicament poisoning NOS                              | 3                 |
| ZX15.00   | Drowning self                                                  | 3                 |
| U72..00   | [X]Sequel intentn self-harm assault+event of undeterm intent   | 2                 |
| ZX1LD00   | [X]Self mutilation                                             | 2                 |
| U40y000   | [X]Poison/exposure ?intent, to unspecif chemical at home       | 2                 |
| U40C000   | [X]Poison/exposure ?intent, to pesticide at home               | 2                 |
| U40A.00   | [X]Pois/exposure, ?intent, to organ solvent, halogen hydrocarb | 2                 |
| U40y400   | [X]Pois/expos ?intent unspecif chemical in street/highway      | 2                 |
| U40yz00   | [X]Pois/expos ?intent to unspecif chemical unspecif place      | 2                 |
| U402z00   | [X]Pois/expos ?intent to sedative hypnotic unspecif place      | 2                 |
| U408z00   | [X]Pois/expos ?intent to oth/unsp drug/medic unspecif place    | 2                 |
| U409z00   | [X]Pois/expos ?intent to alcohol unspecif place                | 2                 |
| U40B400   | [X]Pois/expos ?intent other gas/vapour in street/highway       | 2                 |
| U409400   | [X]Pois/expos ?intent alcohol in street/highway                | 2                 |
| U406y00   | [X]Pois/exp ?intent to hallucinogen other spec place           | 2                 |
| U404300   | [X]Pois/exp ?intent psychotropic drug in sport/athletic area   | 2                 |

1  
2  
3  
4  
5  
6  
7  
8  
9  
10  
11  
12  
13  
14  
15  
16  
17  
18  
19  
20  
21  
22  
23  
24  
25  
26  
27  
28  
29  
30  
31  
32  
33  
34  
35  
36  
37  
38  
39  
40  
41  
42  
43  
44  
45  
46  
47  
48  
49  
50  
51  
52  
53  
54  
55  
56  
57  
58  
59  
60

| Read code | Description                                                   | Number of studies |
|-----------|---------------------------------------------------------------|-------------------|
| U40A300   | [X]Pois/exp ?intent org solvent,halogen hydrocarb,sport area  | 2                 |
| U409200   | [X]Pois/exp ?intent alcohol school/pub admin area             | 2                 |
| U205.11   | [X]Overdose - heroin                                          | 2                 |
| U2Az.00   | [X]Intentional self harm by blunt object occ unspecif place   | 2                 |
| U206z00   | [X]Intent self poison hallucinogen unspecif place             | 2                 |
| U209400   | [X]Intent self pois alcohol in street/highway                 | 2                 |
| U292.00   | [X]Intent self harm sharp obj occ sch oth ins/pub adm area    | 2                 |
| U2yy.00   | [X]Intent self harm oth specif means occ oth specif place     | 2                 |
| U2y6.00   | [X]Intent self harm oth specif means occ indust/constr area   | 2                 |
| U2z1.00   | [X]Intent self harm by unspecif means occurrn resid instit'n  | 2                 |
| U27y.00   | [X]Intent self harm by smoke fire/flame occ oth specif plce   | 2                 |
| U295.00   | [X]Intent self harm by sharp object occ trade/service area    | 2                 |
| U296.00   | [X]Intent self harm by sharp object occ indust/constr area    | 2                 |
| U2B1.00   | [X]Intent self harm by jump from high place occ resid instit  | 2                 |
| U213.00   | [X]Intent self harm by hang strangl/suffc sport/athlet area   | 2                 |
| U2Dz.00   | [X]Intent self harm by crash motor vehic occ unspecif place   | 2                 |
| U2A2.00   | [X]Intent self harm blunt obj occ sch oth ins/pub adm area    | 2                 |
| U20Ay00   | [X]Int self pois org solv,halogen hydrocarb,oth spec place    | 2                 |
| U200600   | [X]Int self pois nonopioid analgesic indust/construct area    | 2                 |
| U282.00   | [X]Int self harm by steam hot vapor/obj sch/ins/pub adm area  | 2                 |
| U4C..00   | [X]Falling lying running befor/into moving obj undet intent   | 2                 |
| U4B6.00   | [X]Fall jump/push frm high plce undt intrn indust/constr area | 2                 |
| U47..00   | [X]Exposure to smoke, fire and flames, undetermined intent    | 2                 |
| U470.00   | [X]Exposure to smoke fire+flame undeterm intent occ at home   | 2                 |
| U42..00   | [X]Drowning and submersion, undetermined intent               | 2                 |
| U4D7.00   | [X]Crashng of motor vehicle undetermined intent occ on farm   | 2                 |
| U4D0.00   | [X]Crashng of motor vehicle undetermined intent occ at home   | 2                 |
| U4D..00   | [X]Crashing of motor vehicle, undetermined intent             | 2                 |
| U4D3.00   | [X]Crash of motor vehicle undeterm intent sport/athlet area   | 2                 |
| U4A5.00   | [X]Contct wth blunt obj undet intent occ trade/service area   | 2                 |
| U4A3.00   | [X]Contct wth blunt obj undet intent occ sport/athletic area  | 2                 |
| U4A0.00   | [X]Contact wth blunt object undetermined intent occ at home   | 2                 |
| U48..00   | [X]Contact with steam hot vapours+objects undetermn intent    | 2                 |
| U49..00   | [X]Contact with sharp object, undetermined intent             | 2                 |
| U49z.00   | [X]Contact with sharp obj undeterm intent occ unspecif place  | 2                 |
| U4A..00   | [X]Contact with blunt object, undetermined intent             | 2                 |
| U4Az.00   | [X]Contact with blunt obj undeterm intent occ unspecif place  | 2                 |
| ZX1S.00   | Throwing self onto floor                                      | 2                 |
| 1BDA.00   | Thoughts of deliberate self harm                              | 2                 |
| 1BD3.00   | Suicidal plans                                                | 2                 |
| 1BD1.00   | Suicidal ideation                                             | 2                 |
| 1B19.11   | Suicidal - symptom                                            | 2                 |
| 1B19.00   | Suicidal                                                      | 2                 |
| ZX19200   | Slapping self                                                 | 2                 |
| ZX1I.00   | Self-scalding                                                 | 2                 |
| ZX1L300   | Self-mutilation of penis                                      | 2                 |
| ZX1L100   | Self-mutilation of hands                                      | 2                 |
| ZX1L200   | Self-mutilation of genitalia                                  | 2                 |
| ZX1L600   | Self-mutilation of ears                                       | 2                 |
| ZX1L.00   | Self-mutilation                                               | 2                 |
| ZX1G.00   | Scratches self                                                | 2                 |
| ZX19100   | Punching self                                                 | 2                 |
| TN...11   | Poisoning undetermined - accidentally or purposely inflicted  | 2                 |

| Read code | Description                                                  | Number of studies |
|-----------|--------------------------------------------------------------|-------------------|
| ZX1E.00   | Pinching self                                                | 2                 |
| ZX1C.00   | Nipping self                                                 | 2                 |
| 14K1.00   | Intentional overdose of prescription only medication         | 2                 |
| TN0..00   | Injury ?accidental, poisoning by solid/liquid substances     | 2                 |
| TN0z.00   | Injury ?accidental, poisoning by solid or liquid subst NOS   | 2                 |
| TN2y.00   | Injury ?accidental, poisoning by other spec gas or vapour    | 2                 |
| TN04.00   | Injury ?accidental, poisoning by other spec drug/medicament  | 2                 |
| TN02.00   | Injury ?accidental, poisoning by other sedative/hypnotic     | 2                 |
| TN2..00   | Injury ?accidental, poisoning by other gases                 | 2                 |
| TN21.00   | Injury ?accidental, poisoning by other carbon monoxide       | 2                 |
| TN20.00   | Injury ?accidental, poisoning by motor vehicle exhaust gas   | 2                 |
| TN11.00   | Injury ?accidental, poisoning by liquid petrol gas           | 2                 |
| TN1..00   | Injury ?accidental, poisoning by gases in domestic use       | 2                 |
| TN1z.00   | Injury ?accidental, poisoning by gas in domestic use NOS     | 2                 |
| TN10.00   | Injury ?accidental, poisoning by gas distributed by pipeline | 2                 |
| TN05.00   | Injury ?accidental, poisoning by drug or medicament NOS      | 2                 |
| TN06.00   | Injury ?accidental, poisoning by corrosive/caustic substance | 2                 |
| TN08.00   | Injury ?accidental, poisoning by arsenic or its compounds    | 2                 |
| TN00.00   | Injury ?accidental, poisoning by analgesic or anti-pyretic   | 2                 |
| TN07.00   | Injury ?accidental, poisoning by agricultural chemicals      | 2                 |
| TN3..00   | Injury ?accidental, hanging, strangulation and suffocation   | 2                 |
| TN30.00   | Injury ?accidental, hanging                                  | 2                 |
| TN01300   | Injury ?accidental poisoning by Pentobarbitone               | 2                 |
| ZRLfC12   | HoNOS item 2 - non-accidental self injury                    | 2                 |
| ZX19.00   | Hitting self                                                 | 2                 |
| ZX13.00   | Cutting self                                                 | 2                 |
| ZX13.11   | Cuts self                                                    | 2                 |
| ZX12.00   | Burning self                                                 | 2                 |
| ZX11.00   | Biting self                                                  | 2                 |
| ZX11.11   | Bites self                                                   | 2                 |
| SL90.00   | Antidepressant poisoning                                     | 2                 |
| 8G6Z.00   | Anti-suicide psychotherapy NOS                               | 2                 |
| 8G6..00   | Anti-suicide psychotherapy                                   | 2                 |
| SL90z00   | Anti-depressant poisoning NOS                                | 2                 |
| U4z..00   | [X]Unspecified event, undetermined intent                    | 1                 |
| U4zz.00   | [X]Unspecif event undeterm intent occurrn unspecif place     | 1                 |
| U4z3.00   | [X]Unspecif event undeterm intent occurrn sport/athlet area  | 1                 |
| U4zy.00   | [X]Unspecif event undeterm intent occurrn oth specif place   | 1                 |
| U4z6.00   | [X]Unspecif event undeterm intent occurrn indust/constr area | 1                 |
| SyuG.00   | [X]Toxic effects of substances chiefly nonmedicinal source   | 1                 |
| SyuG700   | [X]Toxic effects of other specified gases, fumes & vapours   | 1                 |
| SyuGH00   | [X]Toxic effect of paints and dyes, NEC                      | 1                 |
| SyuGJ00   | [X]Toxic effect of other specified substances                | 1                 |
| SyuG900   | [X]Toxic effect of other pesticides                          | 1                 |
| SyuG800   | [X]Toxic effect of other insecticides                        | 1                 |
| SyuGC00   | [X]Toxic effect of other ingested (parts of) plant(s)        | 1                 |
| SyuG000   | [X]Toxic effect of other alcohols                            | 1                 |
| U2E..00   | [X]Self mutilation                                           | 1                 |
| U406.00   | [X]Poisoning/exposure, ? intent, to hallucinogen             | 1                 |
| SyuFM00   | [X]Poisoning by other psychotropic drugs, NEC                | 1                 |
| SyuFB00   | [X]Poisoning by other opioids                                | 1                 |
| SyuFW00   | [X]Poisoning by other laxatives, incl intestin atonia drugs  | 1                 |
| SyuFT00   | [X]Poisoning by other antihypertensive drugs, NEC            | 1                 |

1  
2  
3  
4  
5  
6  
7  
8  
9  
10  
11  
12  
13  
14  
15  
16  
17  
18  
19  
20  
21  
22  
23  
24  
25  
26  
27  
28  
29  
30  
31  
32  
33  
34  
35  
36  
37  
38  
39  
40  
41  
42  
43  
44  
45  
46  
47  
48  
49  
50  
51  
52  
53  
54  
55  
56  
57  
58  
59  
60

| Read code | Description                                                  | Number of studies |
|-----------|--------------------------------------------------------------|-------------------|
| SyuFD00   | [X]Poisoning by other and unspecified narcotics              | 1                 |
| SyuFA00   | [X]Poisoning by other analgesics, not elsewhere classified   | 1                 |
| SyuF900   | [X]Poisoning by oth nonsteroidal anti-inflamm drugs [NSAID]  | 1                 |
| SyuFc00   | [X]Poisoning by oth & unspecif drugs & biologic substances   | 1                 |
| SyuF.00   | [X]Poisoning by drugs and biological substances              | 1                 |
| U40Bz00   | [X]Pois/expos ?intent to other gas/vapour unspecif place     | 1                 |
| U409100   | [X]Pois/expos ?intent to alcohol at res institut             | 1                 |
| U408400   | [X]Pois/expos ?intent oth/unsp drug/medic in street/highway  | 1                 |
| U40yy00   | [X]Pois/exp ?intent to unspecif chemical other spec place    | 1                 |
| U40By00   | [X]Pois/exp ?intent to other gas/vapour other spec place     | 1                 |
| U202.14   | [X]Overdose - flurazepam                                     | 1                 |
| U4y..00   | [X]Other specified events, undetermined intent               | 1                 |
| U4y0.00   | [X]Other specified event undetermind intent occurrn at home  | 1                 |
| U4y3.00   | [X]Oth specif event undetermin intent occ sport/athlet area  | 1                 |
| Eu15000   | [X]Mnt/beh dis due oth stim inc caffen: acute intoxication   | 1                 |
| Eu18000   | [X]Mental & behav dis due vol solvents: acute intoxication   | 1                 |
| Eu17000   | [X]Mental & behav dis due to use tobacco: acute intoxication | 1                 |
| Eu11000   | [X]Mental & behav dis due to use opioids: acute intoxication | 1                 |
| Eu14000   | [X]Mental & behav dis due to use cocaine: acute intoxication | 1                 |
| Eu10000   | [X]Mental & behav dis due to use alcohol: acute intoxication | 1                 |
| Eu13000   | [X]Mental & behav dis due sed/hypntcs: acute intoxication    | 1                 |
| Eu16000   | [X]Mental & behav dis due hallucinogens: acute intoxicatn    | 1                 |
| Eu12000   | [X]Mental & behav dis due cannabinoids: acute intoxication   | 1                 |
| Eu1A000   | [X]Ment behav dis due use crack cocaine: acute intoxication  | 1                 |
| U39..11   | [X]Intentionally shot with shotgun                           | 1                 |
| U38..11   | [X]Intentionally shot with handgun                           | 1                 |
| U41z.00   | [X]Hangng strangult+suffoct undet intent occ unspecif place  | 1                 |
| U4B0.00   | [X]Fallng jumpng/push frm high place undet intent occ home   | 1                 |
| U81..00   | [X]Evid of alcohol involv determind by level of intoxication | 1                 |
| U4D1.00   | [X]Crashng of motor vehicle undeterm intent resident instit  | 1                 |
| U466.00   | [X]Contct wth explosiv materl undet intnt indust/constr area | 1                 |
| U4A6.00   | [X]Contct wth blunt obj undet intent occ industr/constr area | 1                 |
| U46..00   | [X]Contact with explosive material, undetermined intent      | 1                 |
| U4Ay.00   | [X]Contact with blunt obj undeter intent occ oth specif plce | 1                 |
| U1AC.11   | [X]Accidental poisoning with weedkiller                      | 1                 |
| U1A2.13   | [X]Accidental poisoning with temazepam                       | 1                 |
| U1A2.11   | [X]Accidental poisoning with sleeping tablets                | 1                 |
| U1AC.12   | [X]Accidental poisoning with paraquat                        | 1                 |
| U1A0.11   | [X]Accidental poisoning with paracetamol                     | 1                 |
| U1A2.15   | [X]Accidental poisoning with nitrazepam                      | 1                 |
| U1A0.12   | [X]Accidental poisoning with ibuprofen                       | 1                 |
| U1A5.11   | [X]Accidental poisoning with heroin                          | 1                 |
| U1A2.12   | [X]Accidental poisoning with diazepam                        | 1                 |
| U1A2.16   | [X]Accidental poisoning with benzodiazepine                  | 1                 |
| U1A2.17   | [X]Accidental poisoning with barbiturate                     | 1                 |
| U1A0.13   | [X]Accidental poisoning with aspirin                         | 1                 |
| U1A4.11   | [X]Accidental poisoning with antidepressant                  | 1                 |
| U1A4.12   | [X]Accidental poisoning with amitriptyline                   | 1                 |
| U1A4.13   | [X]Accidental poisoning with SSRI                            | 1                 |
| U1AA.11   | [X]Accidental poisoning from glue solvent                    | 1                 |
| U1AD.00   | [X]Accidental poisoning by and exposure to amfetamine        | 1                 |
| U1A..00   | [X]Accidental poisoning by + exposure to noxious substances  | 1                 |
| U1A..12   | [X]Accidental drug overdose / other poisoning                | 1                 |

| Read code | Description                                                  | Number of studies |
|-----------|--------------------------------------------------------------|-------------------|
| U1A..11   | [X]Accidental drug / other poisoning                         | 1                 |
| U1AB.11   | [X]Accidental carbon monoxide poisoning                      | 1                 |
| U1Ay.00   | [X]Accident poisoning/exposure to unspecif chemical          | 1                 |
| U1A2.00   | [X]Accident poisoning/exposure to sedative hypnotic          | 1                 |
| U1A4.00   | [X]Accident poisoning/exposure to psychotropic drug          | 1                 |
| U1AC.00   | [X]Accident poisoning/exposure to pesticide                  | 1                 |
| U1AB.00   | [X]Accident poisoning/exposure to other gas/vapour           | 1                 |
| U1A7.00   | [X]Accident poisoning/exposure to oth autonomic drug         | 1                 |
| U1A0.00   | [X]Accident poisoning/exposure to nonopioid analgesic        | 1                 |
| U1A5.00   | [X]Accident poisoning/exposure to narcotic drug              | 1                 |
| U1A6.00   | [X]Accident poisoning/exposure to hallucinogen               | 1                 |
| U1A3.00   | [X]Accident poisoning/exposure to antiparkinson drug         | 1                 |
| U1A1.00   | [X]Accident poisoning/exposure to antiepileptic              | 1                 |
| U1A9.00   | [X]Accident poisoning/exposure to alcohol                    | 1                 |
| U1AD000   | [X]Accident poisoning by and exposure to amphetamine - home  | 1                 |
| U1Ay700   | [X]Accident poison/exposure to unspecif chemical on farm     | 1                 |
| U1Ay000   | [X]Accident poison/exposure to unspecif chemical at home     | 1                 |
| U1A2000   | [X]Accident poison/exposure to sedative hypnotic at home     | 1                 |
| U1A4000   | [X]Accident poison/exposure to psychotropic drug at home     | 1                 |
| U1AC700   | [X]Accident poison/exposure to pesticide on farm             | 1                 |
| U1AC000   | [X]Accident poison/exposure to pesticide at home             | 1                 |
| U1A8.00   | [X]Accident poison/exposure to other/unspec drug/medicament  | 1                 |
| U1AB700   | [X]Accident poison/exposure to other gas/vapour on farm      | 1                 |
| U1AB000   | [X]Accident poison/exposure to other gas/vapour at home      | 1                 |
| U1A8000   | [X]Accident poison/exposure to oth/unsp drug/medicam home    | 1                 |
| U1A7000   | [X]Accident poison/exposure to oth autonomic drug at home    | 1                 |
| U1A0000   | [X]Accident poison/exposure to nonopioid analgesic at home   | 1                 |
| U1A5000   | [X]Accident poison/exposure to narcotic drug at home         | 1                 |
| U1A1000   | [X]Accident poison/exposure to antiepileptic at home         | 1                 |
| U1A9000   | [X]Accident poison/exposure to alcohol at home               | 1                 |
| U1AA.00   | [X]Accid poison/exposure to organ solvent,halogen hydrocarb  | 1                 |
| U1Ay500   | [X]Accid poison/expos unspecif chemical trade/service area   | 1                 |
| U1Ayz00   | [X]Accid poison/expos to unspecif chemical unspecif place    | 1                 |
| U1Ay100   | [X]Accid poison/expos to unspecif chemical at res institut   | 1                 |
| U1A2z00   | [X]Accid poison/expos to sedative hypnotic unspecif place    | 1                 |
| U1A4100   | [X]Accid poison/expos to psychotropic drug at res institut   | 1                 |
| U1ABz00   | [X]Accid poison/expos to other gas/vapour unspecif place     | 1                 |
| U1A8100   | [X]Accid poison/expos to oth/unsp drug/medicam res institut  | 1                 |
| U1A8z00   | [X]Accid poison/expos to oth/unsp drug/medic unspecif place  | 1                 |
| U1A7z00   | [X]Accid poison/expos to oth autonomic drug unspecif place   | 1                 |
| U1A0z00   | [X]Accid poison/expos to nonopioid analgesic unspecif place  | 1                 |
| U1A5z00   | [X]Accid poison/expos to narcotic drug unspecif place        | 1                 |
| U1A9z00   | [X]Accid poison/expos to alcohol unspecif place              | 1                 |
| U1AA000   | [X]Accid poison/expos organ solvent,halogen hydrocarb, home  | 1                 |
| U1A3500   | [X]Accid poison/expos antiparkinson drug trade/service area  | 1                 |
| U1A9500   | [X]Accid poison/expos alcohol trade/service area             | 1                 |
| U1A9400   | [X]Accid poison/expos alcohol in street/highway              | 1                 |
| U1Ay200   | [X]Acc poison/expos unspecif chemical school/pub admin area  | 1                 |
| U1A4200   | [X]Acc poison/expos psychotropic drug school/pub admin area  | 1                 |
| U1AA100   | [X]Acc poison/expos org solvent,halogen hydrocarb,res instit | 1                 |
| U1A9200   | [X]Acc poison/expos alcohol school/pub admin area            | 1                 |
| U1ADz00   | [X]Acc poison by and exposure to amphetamine - unspec places | 1                 |
| Sy...00   | [X] Injury and poisoning classification terms                | 1                 |



1  
2  
3  
4  
5  
6  
7  
8  
9  
10  
11  
12  
13  
14  
15  
16  
17  
18  
19  
20  
21  
22  
23  
24  
25  
26  
27  
28  
29  
30  
31  
32  
33  
34  
35  
36  
37  
38  
39  
40  
41  
42  
43  
44  
45  
46  
47  
48  
49  
50  
51  
52  
53  
54  
55  
56  
57  
58  
59  
60

| Read code | Description                                               | Number of studies |
|-----------|-----------------------------------------------------------|-------------------|
| U60F412   | [X] Adverse reaction to acetylcysteine                    | 1                 |
| ZV15600   | [V]Personal history of poisoning                          | 1                 |
| ZV4C400   | [V]Occupational exposure to toxic agents in agriculture   | 1                 |
| ZV71A00   | [V]Obs for suspected toxic effect from ingested substance | 1                 |
| SLC7100   | Zinc salt poisoning                                       | 1                 |
| SM01100   | Wood alcohol causing toxic effect                         | 1                 |
| SLEz.00   | Water, mineral or uric acid metabolism poisoning NOS      | 1                 |
| SLE..00   | Water, mineral and urate metabolism poisoning             | 1                 |
| SL42300   | Warfarin sodium poisoning                                 | 1                 |
| SL42400   | Warfarin poisoning                                        | 1                 |
| SL35z00   | Vitamin poisoning NOS                                     | 1                 |
| SL35.00   | Vitamin poisoning NEC                                     | 1                 |
| SL35100   | Vitamin D poisoning                                       | 1                 |
| SL35000   | Vitamin A poisoning                                       | 1                 |
| SL44300   | Urokinase poisoning                                       | 1                 |
| SLE7.00   | Uric acid drug poisoning                                  | 1                 |
| SLE7.11   | Urate metabolism drug poisoning                           | 1                 |
| SM9z.00   | Unspecified substance causing toxic effect NOS            | 1                 |
| SL50000   | Unspecified opium poisoning                               | 1                 |
| SL30400   | Tripelennamine poisoning                                  | 1                 |
| SL60100   | Trimethadione poisoning                                   | 1                 |
| SL92200   | Trifluoperidol poisoning                                  | 1                 |
| SM23100   | Trichloroethylene causing toxic effect                    | 1                 |
| SL90300   | Trazodone poisoning                                       | 1                 |
| SL95z00   | Tranquilliser poisoning NOS                               | 1                 |
| SL9..11   | Tranquilliser poisoning                                   | 1                 |
| TE57.00   | Toxic reactions caused by other plants                    | 1                 |
| F036200   | Toxic encephalitis due to thallium                        | 1                 |
| F036100   | Toxic encephalitis due to mercury                         | 1                 |
| F036000   | Toxic encephalitis due to lead                            | 1                 |
| SMC..00   | Toxic effect of tobacco and nicotine                      | 1                 |
| SM57.00   | Toxic effect of tin and its compounds                     | 1                 |
| SM9A.00   | Toxic effect of rodenticides                              | 1                 |
| SMX..00   | Toxic effect of paints and dyes, NEC                      | 1                 |
| SM9X.00   | Toxic effect of nitroglycerin & oth nitric acids & ester  | 1                 |
| SM79.00   | Toxic effect of hydrogen sulfide                          | 1                 |
| SM15.00   | Toxic effect of homologues of benzene                     | 1                 |
| SM98.00   | Toxic effect of herbicides and fungicides                 | 1                 |
| SMB..00   | Toxic effect of formaldehyde                              | 1                 |
| SM78.00   | Toxic effect of fluorine gas and hydrogen fluoride        | 1                 |
| SM23200   | Toxic effect of chloroform                                | 1                 |
| SM7A.00   | Toxic effect of carbon dioxide                            | 1                 |
| SLG7.00   | Topical dental drug poisoning                             | 1                 |
| SL85.00   | Topical and infiltration anaesthetic agent poisoning      | 1                 |
| SL16200   | Tiabendazole poisoning                                    | 1                 |
| SL27.00   | Thyroid hormone and thyroid derivatives poisoning         | 1                 |
| SL27z00   | Thyroid hormone and thyroid derivative poisoning NOS      | 1                 |
| SL27300   | Thyroglobulin poisoning                                   | 1                 |
| SL91400   | Thioridazine poisoning                                    | 1                 |
| SLE1100   | Theophylline poisoning                                    | 1                 |
| SL04000   | Tetracycline poisoning                                    | 1                 |
| SL04z00   | Tetracycline group poisoning NOS                          | 1                 |
| SL04.00   | Tetracycline group poisoning                              | 1                 |

| Read code | Description                                           | Number of studies |
|-----------|-------------------------------------------------------|-------------------|
| SM23000   | Tetrachloroethylene causing toxic effect              | 1                 |
| SL85300   | Tetracaine poisoning                                  | 1                 |
| SL21300   | Testosterone poisoning                                | 1                 |
| SLF5200   | Terpin hydrate poisoning                              | 1                 |
| SL3z.00   | Systemic agent poisoning NOS                          | 1                 |
| SLB2.00   | Sympathomimetic poisoning                             | 1                 |
| SM31200   | Sulphuric acid causing toxic effect                   | 1                 |
| SM73.00   | Sulphur dioxide causing toxic effect                  | 1                 |
| SL1x400   | Sulphone poisoning                                    | 1                 |
| SL10.00   | Sulphonamide poisoning                                | 1                 |
| SL10200   | Sulfamethoxazole poisoning                            | 1                 |
| SL10000   | Sulfadiazine poisoning                                | 1                 |
| 1BD4.00   | Suicide risk                                          | 1                 |
| ZRn3.00   | Suicide intent score subscale - attempt circumstances | 1                 |
| SN47100   | Suffocation by strangulation                          | 1                 |
| SL06300   | Streptomycin poisoning                                | 1                 |
| SL44200   | Streptokinase poisoning                               | 1                 |
| SL97.11   | Stimulant poisoning                                   | 1                 |
| SM2z.00   | Solvents causing toxic effect NOS                     | 1                 |
| SLC7000   | Sodium morrhuate poisoning                            | 1                 |
| SM32200   | Sodium hydroxide causing toxic effect                 | 1                 |
| SM90100   | Sodium cyanide causing toxic effect                   | 1                 |
| SM96.00   | Soap and detergent causing toxic effect               | 1                 |
| SM96.12   | Soap - toxic effect                                   | 1                 |
| SLF1.00   | Smooth muscle relaxant poisoning                      | 1                 |
| SL7z.11   | Sleeping drug poisoning                               | 1                 |
| SLF2.00   | Skeletal muscle relaxant poisoning                    | 1                 |
| ZX1..00   | Self-injurious behaviour                              | 1                 |
| ZX...00   | Self-harm                                             | 1                 |
| ZX...11   | Self-damage                                           | 1                 |
| SL7..12   | Sedative poisoning                                    | 1                 |
| SL7z.00   | Sedative and hypnotic drug poisoning NOS              | 1                 |
| SL7..00   | Sedative and hypnotic drug poisoning                  | 1                 |
| SL70500   | Secobarbital poisoning                                | 1                 |
| SL51100   | Salicylic acid salt poisoning                         | 1                 |
| SL51z00   | Salicylate poisoning NOS                              | 1                 |
| SL51.00   | Salicylate poisoning                                  | 1                 |
| SLF7100   | Salbutamol poisoning                                  | 1                 |
| ZX1..12   | SIB - Self-injurious behaviour                        | 1                 |
| SM02200   | Rubbing alcohol causing toxic effect                  | 1                 |
| SL06200   | Rifampicin poisoning                                  | 1                 |
| SLF..12   | Respiratory system drug poisoning                     | 1                 |
| SL14500   | Quinine poisoning                                     | 1                 |
| SLC0300   | Quinidine poisoning                                   | 1                 |
| SL14400   | Pyrimethamine poisoning                               | 1                 |
| SL53.00   | Pyrazole derivative poisoning                         | 1                 |
| SL9z.00   | Psychotropic agent poisoning NOS                      | 1                 |
| SL9..00   | Psychotropic agent poisoning                          | 1                 |
| SL97.00   | Psychostimulant poisoning                             | 1                 |
| SL96400   | Psilocybin poisoning                                  | 1                 |
| SL45100   | Protamine sulphate poisoning                          | 1                 |
| SLF0200   | Prostaglandin poisoning                               | 1                 |
| SLC0200   | Propranolol poisoning                                 | 1                 |

1  
2  
3  
4  
5  
6  
7  
8  
9  
10  
11  
12  
13  
14  
15  
16  
17  
18  
19  
20  
21  
22  
23  
24  
25  
26  
27  
28  
29  
30  
31  
32  
33  
34  
35  
36  
37  
38  
39  
40  
41  
42  
43  
44  
45  
46  
47  
48  
49  
50  
51  
52  
53  
54  
55  
56  
57  
58  
59  
60

| Read code | Description                                                | Number of studies |
|-----------|------------------------------------------------------------|-------------------|
| SM70100   | Propane causing toxic effect                               | 1                 |
| SL91300   | Promazine poisoning                                        | 1                 |
| SL14300   | Proguanil poisoning                                        | 1                 |
| SL22300   | Progestogen poisoning                                      | 1                 |
| SL91200   | Prochlorperazine poisoning                                 | 1                 |
| SLC0100   | Procainamide poisoning                                     | 1                 |
| SL6x000   | Primidone poisoning                                        | 1                 |
| 8G61.00   | Potential suicide care                                     | 1                 |
| SM32100   | Potassium hydroxide causing toxic effect                   | 1                 |
| SM90000   | Potassium cyanide causing toxic effect                     | 1                 |
| SL25.00   | Posterior pituitary hormone poisoning                      | 1                 |
| SL94600   | Poisoning by temazepam                                     | 1                 |
| SLD3100   | Poisoning by saline and osmotic laxatives                  | 1                 |
| SL3..00   | Poisoning by primarily systemic agents                     | 1                 |
| SLX..00   | Poisoning by oth & unspec antipsychotics & neuroleptics    | 1                 |
| SL29.00   | Poisoning by mineralocorticoids and their antagonists      | 1                 |
| SLD0200   | Poisoning by histamine H2-receptor antagonists             | 1                 |
| SL20300   | Poisoning by glucocorticoids and synthetic analogues       | 1                 |
| SL...16   | Poisoning by drug and biological substances                | 1                 |
| SL6x100   | Poisoning by carbamazepine                                 | 1                 |
| SLC9.00   | Poisoning by calcium-channel blockers                      | 1                 |
| SLC6400   | Poisoning by angiotensin-converting-enzyme inhibitors      | 1                 |
| SL...00   | Poisoning                                                  | 1                 |
| SM82.12   | Plants - toxic effect                                      | 1                 |
| 1BDB.00   | Plans for deliberate self harm without intent              | 1                 |
| SL16100   | Piperazine poisoning                                       | 1                 |
| SLB0200   | Pilocarpine poisoning                                      | 1                 |
| SM7y000   | Phosgene causing toxic effect                              | 1                 |
| SM93500   | Phosdrin causing toxic effect                              | 1                 |
| SL61000   | Phenytoin poisoning                                        | 1                 |
| SL53100   | Phenylbutazone poisoning                                   | 1                 |
| SLB3000   | Phenoxybenzamine poisoning                                 | 1                 |
| SL91z00   | Phenothiazine poisoning NOS                                | 1                 |
| SL91.00   | Phenothiazine poisoning                                    | 1                 |
| SLD1200   | Phenolphthalein poisoning                                  | 1                 |
| SM30000   | Phenol causing toxic effect                                | 1                 |
| SL70400   | Phenobarbital poisoning                                    | 1                 |
| SL42200   | Phenindione poisoning                                      | 1                 |
| SL52200   | Phenacetin poisoning                                       | 1                 |
| SLH4.00   | Pharmaceutical excipient poisoning                         | 1                 |
| SM1z.00   | Petroleum product causing toxic effect NOS                 | 1                 |
| SM1..00   | Petroleum product causing toxic effect                     | 1                 |
| SM14.00   | Petroleum ether causing toxic effect                       | 1                 |
| SM10.00   | Petrol unspecified causing toxic effect                    | 1                 |
| SL86.00   | Peripheral nerve and plexus-blocking anaesthetic poisoning | 1                 |
| SL70300   | Pentobarbitone poisoning                                   | 1                 |
| SL34000   | Penicillinase poisoning                                    | 1                 |
| SL00z00   | Penicillin poisoning NOS                                   | 1                 |
| SL00.00   | Penicillin poisoning                                       | 1                 |
| SL00300   | Penicillin G poisoning                                     | 1                 |
| E022.00   | Pathological drug intoxication                             | 1                 |
| E014.00   | Pathological alcohol intoxication                          | 1                 |
| SM93300   | Parathion causing toxic effect                             | 1                 |

| Read code | Description                                                | Number of studies |
|-----------|------------------------------------------------------------|-------------------|
| SLB0.00   | Parasympathomimetic poisoning                              | 1                 |
| SL60000   | Paramethadione poisoning                                   | 1                 |
| SM13.00   | Paraffin wax causing toxic effect                          | 1                 |
| SL52100   | Paracetamol poisoning                                      | 1                 |
| SL1x300   | Para-aminosalicylic acid poisoning                         | 1                 |
| SLC5200   | Papaverine poisoning                                       | 1                 |
| SLD4100   | Papain poisoning                                           | 1                 |
| SLD4000   | Pancreatin poisoning                                       | 1                 |
| SL04300   | Oxytetracycline poisoning                                  | 1                 |
| SL21200   | Oxymetholone poisoning                                     | 1                 |
| SL22z00   | Ovarian hormone poisoning NOS                              | 1                 |
| SL22.00   | Ovarian hormone and synthetic substitute poisoning         | 1                 |
| SLC5.00   | Other vasodilator poisoning                                | 1                 |
| SL95.00   | Other tranquilliser poisoning                              | 1                 |
| F377.00   | Other toxic agent polyneuropathy                           | 1                 |
| SL3y.00   | Other systemic agent poisoning                             | 1                 |
| SM9y.00   | Other substance causing toxic effect                       | 1                 |
| SL0y.00   | Other specific antibiotic poisoning                        | 1                 |
| SM2yz00   | Other solvents causing toxic effect NOS                    | 1                 |
| SM2..00   | Other solvents causing toxic effect                        | 1                 |
| SM2y.00   | Other solvents causing toxic effect                        | 1                 |
| SLGx.00   | Other skin and mucous membrane drug poisoning              | 1                 |
| SL7y.00   | Other sedative and hypnotic poisoning                      | 1                 |
| SLFy.00   | Other respiratory system drug poisoning                    | 1                 |
| SL9y.00   | Other psychotropic agent poisoning                         | 1                 |
| SM94.00   | Other pesticides causing toxic effect NEC                  | 1                 |
| SM8y.00   | Other noxious substance eaten as food causing toxic effect | 1                 |
| SM9..00   | Other nonmedicinal substances causing toxic effect         | 1                 |
| SL5x.00   | Other non-narcotic analgesic poisoning                     | 1                 |
| SLF3.00   | Other muscle drug poisoning                                | 1                 |
| SLE6.00   | Other mineral salt poisoning NEC                           | 1                 |
| SM5y.00   | Other metals causing toxic effect OS                       | 1                 |
| SM5yz00   | Other metals causing toxic effect NOS                      | 1                 |
| SM5..00   | Other metals causing toxic effect                          | 1                 |
| SLC6.00   | Other hypertensive agent poisoning                         | 1                 |
| SM71.00   | Other hydrocarbon gas causing toxic effect                 | 1                 |
| SL2y.00   | Other hormone or synthetic derivative poisoning            | 1                 |
| SLDy.00   | Other gastrointestinal agent poisoning                     | 1                 |
| SM7..00   | Other gases, fumes or vapours causing toxic effect         | 1                 |
| SM7y.00   | Other gas, fume or vapour causing toxic effect             | 1                 |
| SM7yz00   | Other gas, fume and vapour causing toxic effect NOS        | 1                 |
| SLHy.00   | Other drug and medicament poisoning OS                     | 1                 |
| SLHyz00   | Other drug and medicament poisoning NOS                    | 1                 |
| SLE4z00   | Other diuretic poisoning NOS                               | 1                 |
| SLC1100   | Other digitalis glycoside poisoning                        | 1                 |
| SLAy.00   | Other central nervous system stimulant poisoning           | 1                 |
| SLD3.00   | Other cathartic poisoning                                  | 1                 |
| SL93.00   | Other antipsychotics/neuroleptics/tranquilliser poisoning  | 1                 |
| SL15.00   | Other antiprotozoal drug poisoning                         | 1                 |
| SL30x00   | Other antihistamine poisoning                              | 1                 |
| SL6x.00   | Other anticonvulsant poisoning                             | 1                 |
| SL1..00   | Other anti-infective poisoning                             | 1                 |
| SL1y.00   | Other anti-infective poisoning                             | 1                 |

1  
2  
3  
4  
5  
6  
7  
8  
9  
10  
11  
12  
13  
14  
15  
16  
17  
18  
19  
20  
21  
22  
23  
24  
25  
26  
27  
28  
29  
30  
31  
32  
33  
34  
35  
36  
37  
38  
39  
40  
41  
42  
43  
44  
45  
46  
47  
48  
49  
50  
51  
52  
53  
54  
55  
56  
57  
58  
59  
60

| Read code | Description                                              | Number of studies |
|-----------|----------------------------------------------------------|-------------------|
| SLH..00   | Other and unspecified drug and medicament poisoning      | 1                 |
| SL5yz00   | Other analgesic or antipyretic poisoning NOS             | 1                 |
| SL5y.00   | Other analgesic and antipyretic poisoning                | 1                 |
| SM0y.00   | Other alcohol causing toxic effect                       | 1                 |
| SM93z00   | Organophosphate and carbamate causing toxic effect NOS   | 1                 |
| SM93.00   | Organophosphate and carbamate causing toxic effect       | 1                 |
| SLF1100   | Orciprenaline poisoning                                  | 1                 |
| SL22000   | Oral contraceptive poisoning                             | 1                 |
| SL50.12   | Opiate poisoning                                         | 1                 |
| SL50z00   | Opiate or narcotic poisoning NOS                         | 1                 |
| SLA1z00   | Opiate antagonist poisoning NOS                          | 1                 |
| SLA1.00   | Opiate antagonist poisoning                              | 1                 |
| SL50.00   | Opiate and narcotic poisoning                            | 1                 |
| SL03100   | Oleandomycin poisoning                                   | 1                 |
| SL22100   | Oestrogen poisoning                                      | 1                 |
| SL01200   | Nystatin poisoning                                       | 1                 |
| SM8z.00   | Noxious substance eaten as food causing toxic effect NOS | 1                 |
| SM8..00   | Noxious substance eaten as food causing toxic effect     | 1                 |
| SLB2100   | Noradrenalin poisoning                                   | 1                 |
| SM...00   | Nonmedicinal agent causing toxic effects                 | 1                 |
| SL5xz00   | Non-narcotic analgesic poisoning NOS                     | 1                 |
| SMz..00   | Non-medicinal agent causing toxic effect NOS             | 1                 |
| SL82100   | Nitrous oxide poisoning                                  | 1                 |
| SM72.00   | Nitrogen oxides causing toxic effect                     | 1                 |
| SM72000   | Nitrogen dioxide causing toxic effect                    | 1                 |
| SL1y100   | Nitrofurantoin poisoning                                 | 1                 |
| SM31100   | Nitric acid causing toxic effect                         | 1                 |
| SL94500   | Nitrazepam poisoning                                     | 1                 |
| SLC4100   | Nitrate poisoning                                        | 1                 |
| SM5y300   | Nickel compounds causing toxic effect                    | 1                 |
| SL50.11   | Narcotic poisoning                                       | 1                 |
| SL54300   | Naproxen poisoning                                       | 1                 |
| SL21100   | Nandrolone poisoning                                     | 1                 |
| SM81.00   | Mushrooms causing toxic effect                           | 1                 |
| SLF..11   | Muscle drug poisoning                                    | 1                 |
| SL50500   | Morphine poisoning                                       | 1                 |
| 1BD2.00   | Morbid thoughts                                          | 1                 |
| SL90200   | Monoamine oxidase inhibitor poisoning                    | 1                 |
| 1BD6.00   | Moderate suicide risk                                    | 1                 |
| SL76.00   | Mixed sedative poisoning NEC                             | 1                 |
| SL07400   | Mitomycin poisoning                                      | 1                 |
| SL04200   | Minocycline poisoning                                    | 1                 |
| SM01.00   | Methyl alcohol causing toxic effect                      | 1                 |
| SL80100   | Methocarbamol poisoning                                  | 1                 |
| SL74.00   | Methaqualone compound poisoning                          | 1                 |
| SM01000   | Methanol causing toxic effect                            | 1                 |
| SL50200   | Methadone poisoning                                      | 1                 |
| SM5z.00   | Metals causing toxic effect NOS                          | 1                 |
| SL12300   | Mercury compound poisoning                               | 1                 |
| SM50.00   | Mercury causing toxic effect                             | 1                 |
| SL31600   | Mercaptopurine poisoning                                 | 1                 |
| SL95100   | Meprobamate poisoning                                    | 1                 |
| SL50400   | Meperidine (pethidine) poisoning                         | 1                 |

| Read code | Description                                                  | Number of studies |
|-----------|--------------------------------------------------------------|-------------------|
| SL54400   | Mefenamic acid poisoning                                     | 1                 |
| SL...13   | Medicinal poisoning                                          | 1                 |
| SL94400   | Medazepam poisoning                                          | 1                 |
| SL96200   | Marihuana poisoning                                          | 1                 |
| SM93200   | Malathion causing toxic effect                               | 1                 |
| SLD0100   | Magnesium trisilicate poisoning                              | 1                 |
| SLD3000   | Magnesium sulphate poisoning                                 | 1                 |
| T180.00   | MVTA - accid poisoning - exhaust gas of moving motor vehicle | 1                 |
| SL90211   | MAOI - monoamine oxidase inhibitor poisoning                 | 1                 |
| SL96100   | Lysergide (LSD) poisoning                                    | 1                 |
| 1BD7.00   | Low suicide risk                                             | 1                 |
| SL94300   | Lorazepam poisoning                                          | 1                 |
| SLG2.12   | Local detergent poisoning                                    | 1                 |
| SLG2.11   | Local astringent poisoning                                   | 1                 |
| SLG2.00   | Local astringent and detergent poisoning                     | 1                 |
| SLG0.00   | Local anti-infective and anti-inflammatory poisoning         | 1                 |
| SL8z.00   | Local anaesthetic poisoning NOS                              | 1                 |
| SLA0000   | Lobeline poisoning                                           | 1                 |
| 44W8100   | Lithium level high - toxic                                   | 1                 |
| SM70.00   | Liquefied petrol gas causing toxic effect                    | 1                 |
| SL85100   | Lidocaine poisoning                                          | 1                 |
| SL27100   | Levothyroxine sodium poisoning                               | 1                 |
| SL6y200   | Levodopa (L-dopa) poisoning                                  | 1                 |
| SL12200   | Lead compound poisoning                                      | 1                 |
| SM4z.00   | Lead compound causing toxic effect NOS                       | 1                 |
| SM4..00   | Lead and lead compounds causing toxic effect                 | 1                 |
| SM41000   | Lead acetate causing toxic effect                            | 1                 |
| TH02.00   | Late effects of accidental poisoning                         | 1                 |
| SC...00   | Late effects injury/poisoning/toxic effects/external causes  | 1                 |
| SC41.00   | Late effect of poison due to nonmedical substance            | 1                 |
| SC40.00   | Late effect of poison drug/medicament/biological substance   | 1                 |
| SC41.11   | Late effect of poison                                        | 1                 |
| SCz..00   | Late effect injury/poison/toxin effect/external cause NOS    | 1                 |
| SL83000   | Ketamine poisoning                                           | 1                 |
| SM12.00   | Kerosene causing toxic effect                                | 1                 |
| SLG4.12   | Keratoplastic poisoning                                      | 1                 |
| SL1x200   | Isoniazid poisoning                                          | 1                 |
| SLD1.00   | Irritant cathartic poisoning                                 | 1                 |
| SM5y200   | Iron compounds causing toxic effect                          | 1                 |
| SL40z00   | Iron and iron compound poisoning NOS                         | 1                 |
| SL40.00   | Iron and iron compound poisoning                             | 1                 |
| SL28000   | Iodide poisoning                                             | 1                 |
| SP35000   | Intoxication by serum                                        | 1                 |
| E250.14   | Intoxication - alcohol                                       | 1                 |
| 1BDC.00   | Intent of deliberate self harm with detailed plans           | 1                 |
| SL23.00   | Insulins and antidiabetic poisoning                          | 1                 |
| SL23400   | Insulin poisoning                                            | 1                 |
| TN...00   | Injury undetermined whether accidentally/purposely inflicted | 1                 |
| TNz..00   | Injury undetermined accidental or purposely inflicted NOS    | 1                 |
| TM21.00   | Injury due to legal intervention by poisoning by gas         | 1                 |
| Sz...00   | Injury and poisoning NOS                                     | 1                 |
| S....00   | Injury and poisoning                                         | 1                 |
| TN3y.00   | Injury ?accidental, other means of hang/strangle/suffocate   | 1                 |

1  
2  
3  
4  
5  
6  
7  
8  
9  
10  
11  
12  
13  
14  
15  
16  
17  
18  
19  
20  
21  
22  
23  
24  
25  
26  
27  
28  
29  
30  
31  
32  
33  
34  
35  
36  
37  
38  
39  
40  
41  
42  
43  
44  
45  
46  
47  
48  
49  
50  
51  
52  
53  
54  
55  
56  
57  
58  
59  
60

| Read code | Description                                                  | Number of studies |
|-----------|--------------------------------------------------------------|-------------------|
| TN9..00   | Injury ?accidental, late effects                             | 1                 |
| TN3z.00   | Injury ?accidental, hanging/strangulation/suffocation NOS    | 1                 |
| TN70.00   | Injury ?accidental, fall from residential premises           | 1                 |
| TN71.00   | Injury ?accidental, fall from other man-made structure       | 1                 |
| TN72.00   | Injury ?accidental, fall from natural site                   | 1                 |
| TN7z.00   | Injury ?accidental, fall from high place NOS                 | 1                 |
| TN7..00   | Injury ?accidental, fall from high place                     | 1                 |
| TN4..00   | Injury ?accidental, drowning                                 | 1                 |
| TN61.00   | Injury ?accidental, by stabbing instrument                   | 1                 |
| TN51.00   | Injury ?accidental, by shotgun                               | 1                 |
| TN82.00   | Injury ?accidental, by scald                                 | 1                 |
| TN8y.00   | Injury ?accidental, by other specified means                 | 1                 |
| TN8..00   | Injury ?accidental, by other means                           | 1                 |
| TN54.00   | Injury ?accidental, by other firearm                         | 1                 |
| TN8z.00   | Injury ?accidental, by means NOS                             | 1                 |
| TN80100   | Injury ?accidental, by lying before moving object            | 1                 |
| TN80.00   | Injury ?accidental, by jumping or lying before moving object | 1                 |
| TN80000   | Injury ?accidental, by jumping before moving object          | 1                 |
| TN52.00   | Injury ?accidental, by hunting rifle                         | 1                 |
| TN50.00   | Injury ?accidental, by handgun                               | 1                 |
| TN5..00   | Injury ?accidental, by firearms and explosives               | 1                 |
| TN5z.00   | Injury ?accidental, by firearm or explosive NOS              | 1                 |
| TN83.00   | Injury ?accidental, by extremes of cold                      | 1                 |
| TN55.00   | Injury ?accidental, by explosive                             | 1                 |
| TN84.00   | Injury ?accidental, by electrocution                         | 1                 |
| TN6z.00   | Injury ?accidental, by cutting or stabbing instrument NOS    | 1                 |
| TN60.00   | Injury ?accidental, by cutting instrument                    | 1                 |
| TN6..00   | Injury ?accidental, by cutting and stabbing instruments      | 1                 |
| TN85.00   | Injury ?accidental, by crashing of motor vehicle             | 1                 |
| TN86.00   | Injury ?accidental, by crashing of aircraft                  | 1                 |
| TN87.00   | Injury ?accidental, by caustic substances, except poisoning  | 1                 |
| TN81.00   | Injury ?accidental, by burns or fire                         | 1                 |
| SL54100   | Indometacin poisoning                                        | 1                 |
| SL31.12   | Immunosuppressive poisoning                                  | 1                 |
| SL90100   | Imipramine poisoning                                         | 1                 |
| SL54200   | Ibuprofen poisoning                                          | 1                 |
| SL7..11   | Hypnotic poisoning                                           | 1                 |
| SLC6z00   | Hypertensive agent poisoning NOS                             | 1                 |
| SLB1200   | Hyoscine poisoning                                           | 1                 |
| SL95000   | Hydroxyzine poisoning                                        | 1                 |
| SL13.11   | Hydroxyquinoline poisoning                                   | 1                 |
| SM31000   | Hydrochloric acid causing toxic effect                       | 1                 |
| SL61.00   | Hydantoin derivative poisoning                               | 1                 |
| SL47100   | Human fibrinogen poisoning                                   | 1                 |
| SL2z.00   | Hormone or synthetic substitute poisoning NOS                | 1                 |
| SL2..00   | Hormone and synthetic substitute poisoning                   | 1                 |
| 1BD5.00   | High suicide risk                                            | 1                 |
| SL50100   | Heroin poisoning                                             | 1                 |
| SL42100   | Heparin poisoning                                            | 1                 |
| SL12z00   | Heavy metal anti-infective poisoning NOS                     | 1                 |
| SL12.00   | Heavy metal anti-infective poisoning                         | 1                 |
| SL3y000   | Heavy metal agonist poisoning                                | 1                 |
| 1BD..00   | Harmful thoughts                                             | 1                 |

| Read code | Description                                                 | Number of studies |
|-----------|-------------------------------------------------------------|-------------------|
| SL81.00   | Halothane poisoning                                         | 1                 |
| SL92000   | Haloperidol poisoning                                       | 1                 |
| SL96z00   | Hallucinogen poisoning NOS                                  | 1                 |
| SL96.00   | Hallucinogen poisoning                                      | 1                 |
| SLG4.00   | Hair treatment poisoning                                    | 1                 |
| 14K0.00   | H/O: repeated overdose                                      | 1                 |
| 14K..00   | H/O: poisoning                                              | 1                 |
| SL24211   | Growth hormone poisoning                                    | 1                 |
| SL01100   | Griseofulvin poisoning                                      | 1                 |
| SL24100   | Gonadotrophin poisoning                                     | 1                 |
| SL54000   | Gold salt poisoning                                         | 1                 |
| SLDz.00   | Gastrointestinal agent poisoning NOS                        | 1                 |
| SLD..00   | Gastrointestinal agent poisoning                            | 1                 |
| SM7z.00   | Gases, fumes or vapours causing toxic effect NOS            | 1                 |
| SLC3z00   | Ganglion-blocker poisoning NOS                              | 1                 |
| SLC3.00   | Ganglion-blocker poisoning                                  | 1                 |
| SM03z00   | Fusel oil causing toxic effect NOS                          | 1                 |
| SLE4100   | Furosemide poisoning                                        | 1                 |
| SM74.00   | Freon causing toxic effect                                  | 1                 |
| SL41000   | Folic acid poisoning                                        | 1                 |
| SL94200   | Flurazepam poisoning                                        | 1                 |
| SL91100   | Fluphenazine poisoning                                      | 1                 |
| SL31500   | Fluorouracil poisoning                                      | 1                 |
| SL1y000   | Flucytosine poisoning                                       | 1                 |
| SL40100   | Ferrous sulphate poisoning                                  | 1                 |
| SL40000   | Ferric salt poisoning                                       | 1                 |
| SLG..00   | Eye, otorhinolaryngological, skin and dental drug poisoning | 1                 |
| SLG5z00   | Eye drug poisoning NOS                                      | 1                 |
| SLG5.00   | Eye drug poisoning NEC                                      | 1                 |
| SLG..12   | Eye drug poisoning                                          | 1                 |
| SLF5.00   | Expectorant poisoning                                       | 1                 |
| SM00z00   | Ethyl alcohol causing toxic effect NOS                      | 1                 |
| SM00.00   | Ethyl alcohol causing toxic effect                          | 1                 |
| SL6y100   | Ethopropazine poisoning                                     | 1                 |
| SL82000   | Ether poisoning                                             | 1                 |
| SM00000   | Ethanol causing toxic effect                                | 1                 |
| SL1x000   | Ethambutol poisoning                                        | 1                 |
| SLE4000   | Ethacrynic acid poisoning                                   | 1                 |
| SL03000   | Erythromycin poisoning                                      | 1                 |
| SL03.00   | Erythromycin and macrolide poisoning                        | 1                 |
| SLF0000   | Ergot alkaloid poisoning                                    | 1                 |
| E230200   | Episodic acute alcoholic intoxication in alcoholism         | 1                 |
| SL34.00   | Enzyme poisoning NEC                                        | 1                 |
| SLG3.00   | Emollients, demulcents and protectant poisoning             | 1                 |
| SLD2.00   | Emollient cathartic poisoning                               | 1                 |
| SLD6.00   | Emetic drug poisoning                                       | 1                 |
| SLE5.00   | Electrolyte agent poisoning                                 | 1                 |
| SL97200   | Ecstasy poisoning                                           | 1                 |
| SLG6.00   | Ear, nose and throat drug poisoning NEC                     | 1                 |
| SLz..00   | Drug, medicament or biological substance poisoning NOS      | 1                 |
| SL...12   | Drug poisoning                                              | 1                 |
| SL04100   | Doxycycline poisoning                                       | 1                 |
| SLE..11   | Diuretic poisoning                                          | 1                 |



1  
2  
3  
4  
5  
6  
7  
8  
9  
10  
11  
12  
13  
14  
15  
16  
17  
18  
19  
20  
21  
22  
23  
24  
25  
26  
27  
28  
29  
30  
31  
32  
33  
34  
35  
36  
37  
38  
39  
40  
41  
42  
43  
44  
45  
46  
47  
48  
49  
50  
51  
52  
53  
54  
55  
56  
57  
58  
59  
60

| Read code | Description                                            | Number of studies |
|-----------|--------------------------------------------------------|-------------------|
| SLC4000   | Dipyridamole poisoning                                 | 1                 |
| SL30100   | Diphenhydramine poisoning                              | 1                 |
| SLD2000   | Diocetyl sulphosuccinate poisoning                     | 1                 |
| SM02000   | Dimethyl carbinol causing toxic effect                 | 1                 |
| SL50700   | Dihydrocodeine poisoning                               | 1                 |
| SLC1000   | Digoxin poisoning                                      | 1                 |
| SLD4.00   | Digestant poisoning                                    | 1                 |
| SL94100   | Diazepam poisoning                                     | 1                 |
| SLHy100   | Diagnostic agent NEC, poisoning                        | 1                 |
| SL50600   | Dextropropoxyphene poisoning                           | 1                 |
| SLF4000   | Dextromethorphan poisoning                             | 1                 |
| SM96.11   | Detergent toxic effect                                 | 1                 |
| SM00100   | Denatured alcohol causing toxic effect                 | 1                 |
| ZX1..13   | Deliberate self-harm                                   | 1                 |
| SL07300   | Daunorubicin poisoning                                 | 1                 |
| SL07100   | Dactinomycin poisoning                                 | 1                 |
| SM92200   | DDT causing toxic effect                               | 1                 |
| SL31400   | Cytarabine poisoning                                   | 1                 |
| SL31300   | Cyclophosphamide poisoning                             | 1                 |
| SLC5000   | Cyclandelate poisoning                                 | 1                 |
| SM90z00   | Cyanides causing toxic effect NOS                      | 1                 |
| SM90.00   | Cyanides and hydrocyanic acid causing toxic effect     | 1                 |
| ZX13100   | Cutting own wrists                                     | 1                 |
| SL42000   | Coumarin poisoning                                     | 1                 |
| SL20000   | Cortisone derivative poisoning                         | 1                 |
| SL24000   | Corticotropin poisoning                                | 1                 |
| SM3..00   | Corrosives/acids/caustic alkalis causing toxic effect  | 1                 |
| SM3z.00   | Corrosive/acid/caustic alkali causing toxic effect NOS | 1                 |
| SM30z00   | Corrosive aromatics causing toxic effect NOS           | 1                 |
| SLC4.00   | Coronary vasodilator poisoning                         | 1                 |
| SM5y100   | Copper salts causing toxic effect                      | 1                 |
| E230100   | Continuous acute alcoholic intoxication in alcoholism  | 1                 |
| SL22200   | Combined oestrogen and progesterone poisoning          | 1                 |
| SLE7100   | Colchicine poisoning                                   | 1                 |
| SL50300   | Codeine (methyldorphine) poisoning                     | 1                 |
| SL85000   | Cocaine poisoning                                      | 1                 |
| SLC6000   | Clonidine poisoning                                    | 1                 |
| SM56.00   | Chromium causing toxic effect                          | 1                 |
| SLB0z00   | Cholinergic poisoning NOS                              | 1                 |
| SLB0.11   | Cholinergic poisoning                                  | 1                 |
| SL91000   | Chlorpromazine poisoning                               | 1                 |
| SL30000   | Chlorphenamine poisoning                               | 1                 |
| SL14000   | Chloroquine poisoning                                  | 1                 |
| SM75100   | Chloroacetophenone causing toxic effect                | 1                 |
| SM76.00   | Chlorine gas causing toxic effect                      | 1                 |
| SM92.00   | Chlorinated hydrocarbon causing toxic effect           | 1                 |
| SL94000   | Chlordiazepoxide poisoning                             | 1                 |
| SL02000   | Chloramphenicol poisoning                              | 1                 |
| SL31200   | Chlorambucil poisoning                                 | 1                 |
| SL71.00   | Chloral hydrate poisoning                              | 1                 |
| SL13000   | Chiniofon poisoning                                    | 1                 |
| SLH2.11   | Chelating agent poisoning                              | 1                 |
| SLAz.00   | Central nervous system stimulant poisoning NOS         | 1                 |

| Read code | Description                                                  | Number of studies |
|-----------|--------------------------------------------------------------|-------------------|
| SLA..00   | Central nervous system stimulant poisoning                   | 1                 |
| SL80z00   | Central nervous system muscle-tone depressant poisoning NOS  | 1                 |
| SL80.00   | Central nervous system muscle-tone depressant poisoning      | 1                 |
| SL8..00   | Central nervous system depressants and anaesthetic poisoning | 1                 |
| SLH0000   | Central appetite depressant poisoning                        | 1                 |
| SL05000   | Cefalexin poisoning                                          | 1                 |
| SM32z00   | Caustic alkalis causing toxic effect NOS                     | 1                 |
| SM32.00   | Caustic alkalis causing toxic effect                         | 1                 |
| Tz...00   | Causes of injury and poisoning NOS                           | 1                 |
| T....00   | Causes of injury and poisoning                               | 1                 |
| T8...11   | Cause of overdose - accidental                               | 1                 |
| SLC..00   | Cardiovascular drug poisoning                                | 1                 |
| SLCz.00   | Cardiovascular agent poisoning NOS                           | 1                 |
| SLC0.00   | Cardiac rhythm drug poisoning                                | 1                 |
| SLC1.00   | Cardiac glycoside poisoning                                  | 1                 |
| SM21.00   | Carbon tetrachloride causing toxic effect                    | 1                 |
| SM6..00   | Carbon monoxide causing toxic effect                         | 1                 |
| SM93000   | Carbaryl causing toxic effect                                | 1                 |
| SL80000   | Carbamate poisoning                                          | 1                 |
| SLB1400   | Caramiphen poisoning                                         | 1                 |
| SL96000   | Cannabis poisoning                                           | 1                 |
| SL97100   | Caffeine poisoning                                           | 1                 |
| SM55.00   | Cadmium causing toxic effect                                 | 1                 |
| SM70000   | Butane causing toxic effect                                  | 1                 |
| SL70200   | Butabarbitalone poisoning                                    | 1                 |
| SL31100   | Busulfan poisoning                                           | 1                 |
| SL07200   | Bleomycin poisoning                                          | 1                 |
| SL...11   | Biological substance poisoning                               | 1                 |
| SL23100   | Biguanide poisoning                                          | 1                 |
| SLC0400   | Beta blocker poisoning                                       | 1                 |
| SM53.00   | Beryllium causing toxic effect                               | 1                 |
| SM82.00   | Berries and other plants causing toxic effect                | 1                 |
| SM82.11   | Berries - toxic effect                                       | 1                 |
| SLE3000   | Benzothiazide poisoning                                      | 1                 |
| SL94z00   | Benzodiazepine poisoning NOS                                 | 1                 |
| SL94.00   | Benzodiazepine poisoning                                     | 1                 |
| SM20.00   | Benzene causing toxic effect                                 | 1                 |
| SL70z00   | Barbiturate poisoning NOS                                    | 1                 |
| SL70.00   | Barbiturate poisoning                                        | 1                 |
| SL70100   | Barbitone poisoning                                          | 1                 |
| SL31000   | Azathioprine poisoning                                       | 1                 |
| SLB..00   | Autonomic nervous system drug poisoning                      | 1                 |
| SLB1000   | Atropine poisoning                                           | 1                 |
| 1BD8.00   | At risk of DSH - deliberate self harm                        | 1                 |
| TL22.00   | Assault by poisoning by other gases or vapours               | 1                 |
| TL20.00   | Assault by poisoning by drugs or medicines                   | 1                 |
| TL2z.00   | Assault by poisoning NOS                                     | 1                 |
| TL2..00   | Assault by poisoning                                         | 1                 |
| SL51000   | Aspirin poisoning                                            | 1                 |
| SL11.00   | Arsenical anti-infective poisoning                           | 1                 |
| SM51.00   | Arsenic causing toxic effect                                 | 1                 |
| SL52z00   | Aromatic analgesic poisoning NOS                             | 1                 |
| SL52.00   | Aromatic analgesic poisoning NEC                             | 1                 |

1  
2  
3  
4  
5  
6  
7  
8  
9  
10  
11  
12  
13  
14  
15  
16  
17  
18  
19  
20  
21  
22  
23  
24  
25  
26  
27  
28  
29  
30  
31  
32  
33  
34  
35  
36  
37  
38  
39  
40  
41  
42  
43  
44  
45  
46  
47  
48  
49  
50  
51  
52  
53  
54  
55  
56  
57  
58  
59  
60

| Read code | Description                                             | Number of studies |
|-----------|---------------------------------------------------------|-------------------|
| SLF4z00   | Antitussive poisoning NOS                               | 1                 |
| SL28.00   | Antithyroid agent poisoning                             | 1                 |
| SL54z00   | Antirheumatic poisoning NOS                             | 1                 |
| SL54.00   | Antirheumatic poisoning                                 | 1                 |
| SL5y200   | Antipyretic poisoning, NEC                              | 1                 |
| SL5..12   | Antipyretic poisoning                                   | 1                 |
| SL6y.00   | Antiparkinsonism drug poisoning                         | 1                 |
| SL6yz00   | Antiparkinsonian drug poisoning NOS                     | 1                 |
| SL31z00   | Antineoplastic or immunosuppressive poisoning NOS       | 1                 |
| SL07.00   | Antineoplastic antibiotic poisoning                     | 1                 |
| SL31.00   | Antineoplastic and immunosuppressive poisoning          | 1                 |
| SL14z00   | Antimalarial drug poisoning NOS                         | 1                 |
| SL14.00   | Antimalarial drug poisoning                             | 1                 |
| SLC2.00   | Antilipaemic and antiarteriosclerotic poisoning         | 1                 |
| SL30.13   | Antihistamine poisoning                                 | 1                 |
| SL01.00   | Antifungal antibiotic poisoning                         | 1                 |
| SL30.12   | Antiemetic poisoning                                    | 1                 |
| SLD5z00   | Antidiarrhoeal poisoning NOS                            | 1                 |
| SLD5.00   | Antidiarrhoeal poisoning                                | 1                 |
| SL6xz00   | Anticonvulsant poisoning NOS                            | 1                 |
| SL6..11   | Anticonvulsant poisoning                                | 1                 |
| SL6z.00   | Anticonvulsant or antiparkinsonian drug poisoning NOS   | 1                 |
| SL6..00   | Anticonvulsant and antiParkinsonian drug poisoning      | 1                 |
| SL42z00   | Anticoagulant poisoning NOS                             | 1                 |
| SL42.00   | Anticoagulant poisoning                                 | 1                 |
| SL45z00   | Anticoagulant agonist poisoning NOS                     | 1                 |
| SL45.00   | Anticoagulant agonist poisoning                         | 1                 |
| SLB0100   | Anticholinesterase poisoning                            | 1                 |
| SL0z.00   | Antibiotic poisoning NOS                                | 1                 |
| SL0..00   | Antibiotic poisoning                                    | 1                 |
| SLF7z00   | Antiasthmatic poisoning NOS                             | 1                 |
| SL30.00   | Antiallergic and antiemetic drug poisoning              | 1                 |
| SL1z.00   | Anti-infective poisoning NOS                            | 1                 |
| SLD0.00   | Anti-gastric acid drug poisoning                        | 1                 |
| SLF6.00   | Anti-common cold drug poisoning                         | 1                 |
| SL16.00   | Anthelmintic drug poisoning                             | 1                 |
| SL24.00   | Anterior pituitary hormone poisoning                    | 1                 |
| SLD0z00   | Antacid drug poisoning NOS                              | 1                 |
| SLD0.11   | Antacid drug poisoning                                  | 1                 |
| SL21.12   | Androgen poisoning                                      | 1                 |
| SL21z00   | Androgen or anabolic poisoning NOS                      | 1                 |
| SL21.00   | Androgen and anabolic poisoning                         | 1                 |
| SL5z.00   | Analgesic, antipyretic or antirheumatic poisoning NOS   | 1                 |
| SL5..00   | Analgesic, antipyretic and antirheumatic drug poisoning | 1                 |
| SL5y100   | Analgesic poisoning, NEC                                | 1                 |
| SL5..11   | Analgesic poisoning                                     | 1                 |
| SLA0.00   | Analeptic poisoning                                     | 1                 |
| SL8..11   | Anaesthetic poisoning                                   | 1                 |
| SL21.11   | Anabolic steroid poisoning                              | 1                 |
| SM03000   | Amyl alcohol causing toxic effect                       | 1                 |
| SL00000   | Ampicillin poisoning                                    | 1                 |
| SL01000   | Amphotericin B poisoning                                | 1                 |
| SL70000   | Amobarbital poisoning                                   | 1                 |

| Read code | Description                                                  | Number of studies |
|-----------|--------------------------------------------------------------|-------------------|
| SL90000   | Amitriptyline poisoning                                      | 1                 |
| SLF7000   | Aminophylline poisoning                                      | 1                 |
| SL97000   | Amphetamine poisoning                                        | 1                 |
| SL6y000   | Amantadine poisoning                                         | 1                 |
| SLD0000   | Aluminium hydroxide poisoning                                | 1                 |
| SLE7000   | Allopurinol poisoning                                        | 1                 |
| SLH3.00   | Alcohol deterrent poisoning                                  | 1                 |
| E230.11   | Alcohol dependence with acute alcoholic intoxication         | 1                 |
| SM0z.00   | Alcohol causing toxic effect NOS                             | 1                 |
| SM0..00   | Alcohol causing toxic effect                                 | 1                 |
| SL4..00   | Agents affecting blood constituents, causing poisoning       | 1                 |
| TJF5100   | Adverse reaction to ipecacuanha                              | 1                 |
| TJF5000   | Adverse reaction to acetylcysteine                           | 1                 |
| SLC8000   | Adrenochrome poisoning                                       | 1                 |
| SLB2.11   | Adrenergic poisoning                                         | 1                 |
| SL20z00   | Adrenal cortico-steroid poisoning NOS                        | 1                 |
| SL20.00   | Adrenal cortico-steroid poisoning                            | 1                 |
| 761H300   | Administration of activated charcoal                         | 1                 |
| E230000   | Acute alcoholic intoxication, unspecified, in alcoholism     | 1                 |
| E230z00   | Acute alcoholic intoxication in alcoholism NOS               | 1                 |
| E230.00   | Acute alcoholic intoxication in alcoholism                   | 1                 |
| SM31z00   | Acids causing toxic effect NOS                               | 1                 |
| SM31.00   | Acids causing toxic effect                                   | 1                 |
| SL32.00   | Acidifying agent poisoning                                   | 1                 |
| SLB0000   | Acetylcholine poisoning                                      | 1                 |
| SM2y000   | Acetone causing toxic effect                                 | 1                 |
| SL23000   | Acetohexamide poisoning                                      | 1                 |
| SLE2000   | Acetazolamide poisoning                                      | 1                 |
| T80yz00   | Accidental poisoning-oth analgesic,antipyretic,antirheum NOS | 1                 |
| T830z00   | Accidental poisoning- phenothiazine-based tranquillisers NOS | 1                 |
| T832z00   | Accidental poisoning- benzodiazepine-based tranquilliser NOS | 1                 |
| T953100   | Accidental poisoning from seeds                              | 1                 |
| T954.00   | Accidental poisoning from other plants                       | 1                 |
| T955y00   | Accidental poisoning from other fungi                        | 1                 |
| T955.00   | Accidental poisoning from mushrooms and other fungi          | 1                 |
| T955z00   | Accidental poisoning from mushrooms and fungi NOS            | 1                 |
| T955000   | Accidental poisoning from mushrooms                          | 1                 |
| T95..00   | Accidental poisoning from foodstuffs and poisonous plants    | 1                 |
| T953z00   | Accidental poisoning from berries or seeds NOS               | 1                 |
| T953.00   | Accidental poisoning from berries and seeds                  | 1                 |
| T953000   | Accidental poisoning from berries                            | 1                 |
| T937400   | Accidental poisoning by zinc phosphide                       | 1                 |
| T916300   | Accidental poisoning by white washes                         | 1                 |
| T885.00   | Accidental poisoning by water,mineral,uric acid metab drugs  | 1                 |
| T937300   | Accidental poisoning by warfarin                             | 1                 |
| T981z00   | Accidental poisoning by utility gas NOS                      | 1                 |
| T88z.00   | Accidental poisoning by unspecified drugs                    | 1                 |
| T83z.00   | Accidental poisoning by tranquillisers NOS                   | 1                 |
| T83..00   | Accidental poisoning by tranquillisers                       | 1                 |
| T930500   | Accidental poisoning by toxaphene                            | 1                 |
| T964700   | Accidental poisoning by thallium compounds                   | 1                 |
| T937200   | Accidental poisoning by thallium                             | 1                 |
| T993.00   | Accidental poisoning by tear gas                             | 1                 |

1  
2  
3  
4  
5  
6  
7  
8  
9  
10  
11  
12  
13  
14  
15  
16  
17  
18  
19  
20  
21  
22  
23  
24  
25  
26  
27  
28  
29  
30  
31  
32  
33  
34  
35  
36  
37  
38  
39  
40  
41  
42  
43  
44  
45  
46  
47  
48  
49  
50  
51  
52  
53  
54  
55  
56  
57  
58  
59  
60

| Read code | Description                                                | Number of studies |
|-----------|------------------------------------------------------------|-------------------|
| T910.00   | Accidental poisoning by synthetic detergents and shampoos  | 1                 |
| T941200   | Accidental poisoning by sulphuric acid                     | 1                 |
| T991.00   | Accidental poisoning by sulphur dioxide                    | 1                 |
| T937100   | Accidental poisoning by squill and derivatives             | 1                 |
| T92z.00   | Accidental poisoning by solvent NOS                        | 1                 |
| T96z.00   | Accidental poisoning by solid and liquid substances NOS    | 1                 |
| T942000   | Accidental poisoning by sodium hydroxide                   | 1                 |
| T911.00   | Accidental poisoning by soap products                      | 1                 |
| T887z00   | Accidental poisoning by skin, eye, ENT and dental drug NOS | 1                 |
| T887000   | Accidental poisoning by skin drugs                         | 1                 |
| T82z.00   | Accidental poisoning by sedatives and hypnotics NOS        | 1                 |
| T903300   | Accidental poisoning by secondary propyl alcohol           | 1                 |
| T913000   | Accidental poisoning by scouring agents                    | 1                 |
| T803z00   | Accidental poisoning by salicylates NOS                    | 1                 |
| T803.00   | Accidental poisoning by salicylates                        | 1                 |
| T937z00   | Accidental poisoning by rodenticides NOS                   | 1                 |
| T937.00   | Accidental poisoning by rodenticides                       | 1                 |
| T815.00   | Accidental poisoning by quinalbarbitone                    | 1                 |
| T805.00   | Accidental poisoning by pyrazole derivatives               | 1                 |
| T84z.00   | Accidental poisoning by psychotropic agents NOS            | 1                 |
| T841400   | Accidental poisoning by psilocin                           | 1                 |
| T932200   | Accidental poisoning by propoxur                           | 1                 |
| T980200   | Accidental poisoning by propane                            | 1                 |
| T830300   | Accidental poisoning by promazine                          | 1                 |
| T830200   | Accidental poisoning by prochlorperazine                   | 1                 |
| T881.00   | Accidental poisoning by primarily systemic agents          | 1                 |
| T912.00   | Accidental poisoning by polishes                           | 1                 |
| T965z00   | Accidental poisoning by plant foods and fertilisers NOS    | 1                 |
| T965.00   | Accidental poisoning by plant foods and fertilisers        | 1                 |
| T965000   | Accidental poisoning by plant food                         | 1                 |
| T973.00   | Accidental poisoning by piped natural gas                  | 1                 |
| T938200   | Accidental poisoning by phosphine                          | 1                 |
| T805100   | Accidental poisoning by phenylbutazone                     | 1                 |
| T830.00   | Accidental poisoning by phenothiazine-based tranquillisers | 1                 |
| T940011   | Accidental poisoning by phenol                             | 1                 |
| T814.00   | Accidental poisoning by phenobarbitone                     | 1                 |
| T804200   | Accidental poisoning by phenacetin                         | 1                 |
| T920.00   | Accidental poisoning by petroleum solvents                 | 1                 |
| T923.00   | Accidental poisoning by petroleum solids                   | 1                 |
| T920200   | Accidental poisoning by petroleum naphtha                  | 1                 |
| T921.12   | Accidental poisoning by petroleum fuels                    | 1                 |
| T920z00   | Accidental poisoning by petrol solvents NOS                | 1                 |
| T923z00   | Accidental poisoning by petrol solids NOS                  | 1                 |
| T92..00   | Accidental poisoning by petrol products                    | 1                 |
| T921.00   | Accidental poisoning by petrol fuels and cleaners          | 1                 |
| T921z00   | Accidental poisoning by petrol fuel or cleaner NOS         | 1                 |
| T921200   | Accidental poisoning by petrol                             | 1                 |
| T802100   | Accidental poisoning by pethidine                          | 1                 |
| T813.00   | Accidental poisoning by pentobarbitone                     | 1                 |
| T80y000   | Accidental poisoning by pentazocine                        | 1                 |
| T935500   | Accidental poisoning by paraquat                           | 1                 |
| T923000   | Accidental poisoning by paraffin wax                       | 1                 |
| T804100   | Accidental poisoning by paracetamol                        | 1                 |

| Read code | Description                                                  | Number of studies |
|-----------|--------------------------------------------------------------|-------------------|
| T916z00   | Accidental poisoning by paint or varnish NOS                 | 1                 |
| T887300   | Accidental poisoning by otorhinolaryngological drugs         | 1                 |
| T98..00   | Accidental poisoning by other utility gas + carbon monoxide  | 1                 |
| T981.00   | Accidental poisoning by other utility gas                    | 1                 |
| T83yz00   | Accidental poisoning by other tranquilisers NOS              | 1                 |
| T83y.00   | Accidental poisoning by other tranquilisers                  | 1                 |
| T924z00   | Accidental poisoning by other solvents NOS                   | 1                 |
| T924.00   | Accidental poisoning by other solvents                       | 1                 |
| T96y.00   | Accidental poisoning by other solid and liquid substances OS | 1                 |
| T96..00   | Accidental poisoning by other solid and liquid substances    | 1                 |
| T82y.00   | Accidental poisoning by other sedatives and hypnotics OS     | 1                 |
| T82..00   | Accidental poisoning by other sedatives and hypnotics        | 1                 |
| T84..00   | Accidental poisoning by other psychotropic agents            | 1                 |
| T916.00   | Accidental poisoning by other paints and varnishes           | 1                 |
| T802z00   | Accidental poisoning by other opiates NOS                    | 1                 |
| T802.00   | Accidental poisoning by other opiates                        | 1                 |
| T807.00   | Accidental poisoning by other non-narcotic analgesics        | 1                 |
| T9...00   | Accidental poisoning by other non-drug substances            | 1                 |
| T964.00   | Accidental poisoning by other metals + compounds and fumes   | 1                 |
| T934.00   | Accidental poisoning by other insecticides                   | 1                 |
| T99y.00   | Accidental poisoning by other gases and vapours OS           | 1                 |
| T99yz00   | Accidental poisoning by other gases and vapours NOS          | 1                 |
| T99..00   | Accidental poisoning by other gases and vapours              | 1                 |
| T95y.00   | Accidental poisoning by other foods                          | 1                 |
| T901.00   | Accidental poisoning by other ethyl alcohol and its products | 1                 |
| T85..00   | Accidental poisoning by other drugs acting on nervous system | 1                 |
| T88y.00   | Accidental poisoning by other drugs OS                       | 1                 |
| T88yz00   | Accidental poisoning by other drugs NOS                      | 1                 |
| T88..00   | Accidental poisoning by other drugs                          | 1                 |
| T94y.00   | Accidental poisoning by other corrosives and caustics        | 1                 |
| T913z00   | Accidental poisoning by other cleaning agents NOS            | 1                 |
| T913.00   | Accidental poisoning by other cleaning agents                | 1                 |
| T90y.00   | Accidental poisoning by other alcohols                       | 1                 |
| T966y00   | Accidental poisoning by other adhesives                      | 1                 |
| T851.00   | Accidental poisoning by oth central nervous syst depressants | 1                 |
| T80y.00   | Accidental poisoning by oth analgesics,antipyretic,antirheum | 1                 |
| T931z00   | Accidental poisoning by organophosphorus insecticides NOS    | 1                 |
| T931.00   | Accidental poisoning by organophosphorus insecticides        | 1                 |
| T930.00   | Accidental poisoning by organochlorine insecticides          | 1                 |
| T936000   | Accidental poisoning by organic mercurials                   | 1                 |
| T802300   | Accidental poisoning by opium                                | 1                 |
| T843100   | Accidental poisoning by opiate antagonists                   | 1                 |
| T887200   | Accidental poisoning by ophthalmological drugs               | 1                 |
| T855100   | Accidental poisoning by noradrenalin                         | 1                 |
| T807z00   | Accidental poisoning by non-narcotic analgesics NOS          | 1                 |
| T916200   | Accidental poisoning by non-lead paints                      | 1                 |
| T990.00   | Accidental poisoning by nitrogen oxides                      | 1                 |
| T941100   | Accidental poisoning by nitric acid                          | 1                 |
| T832500   | Accidental poisoning by nitrazepam                           | 1                 |
| T964600   | Accidental poisoning by nickel compounds                     | 1                 |
| T806200   | Accidental poisoning by naproxen                             | 1                 |
| T886.00   | Accidental poisoning by muscle + respiratory system drugs    | 1                 |
| T887100   | Accidental poisoning by mucous membrane drugs                | 1                 |

1  
2  
3  
4  
5  
6  
7  
8  
9  
10  
11  
12  
13  
14  
15  
16  
17  
18  
19  
20  
21  
22  
23  
24  
25  
26  
27  
28  
29  
30  
31  
32  
33  
34  
35  
36  
37  
38  
39  
40  
41  
42  
43  
44  
45  
46  
47  
48  
49  
50  
51  
52  
53  
54  
55  
56  
57  
58  
59  
60

| Read code | Description                                                 | Number of studies |
|-----------|-------------------------------------------------------------|-------------------|
| T982.00   | Accidental poisoning by motor vehicle exhaust gas           | 1                 |
| T802200   | Accidental poisoning by morphine                            | 1                 |
| T840200   | Accidental poisoning by monoamine oxidase inhibitors        | 1                 |
| T933.00   | Accidental poisoning by mixtures of insecticides            | 1                 |
| T935400   | Accidental poisoning by mixtures herbicides+plant food etc  | 1                 |
| T825.00   | Accidental poisoning by mixed sedatives NEC                 | 1                 |
| T901100   | Accidental poisoning by methylated spirit                   | 1                 |
| T938100   | Accidental poisoning by methyl bromide                      | 1                 |
| T902.00   | Accidental poisoning by methyl alcohol                      | 1                 |
| T823.00   | Accidental poisoning by methaqualone compounds              | 1                 |
| T902000   | Accidental poisoning by methanol                            | 1                 |
| T801.00   | Accidental poisoning by methadone                           | 1                 |
| T964z00   | Accidental poisoning by metals + compounds and fumes NOS    | 1                 |
| T961000   | Accidental poisoning by mercury, unspecified                | 1                 |
| T961z00   | Accidental poisoning by mercury, NOS                        | 1                 |
| T961200   | Accidental poisoning by mercury fumes                       | 1                 |
| T961.00   | Accidental poisoning by mercury and its compounds and fumes | 1                 |
| T832400   | Accidental poisoning by medazepam                           | 1                 |
| T964500   | Accidental poisoning by manganese and its compounds         | 1                 |
| T931300   | Accidental poisoning by malathion                           | 1                 |
| T841100   | Accidental poisoning by lysergide, LSD                      | 1                 |
| T922.00   | Accidental poisoning by lubricating oils                    | 1                 |
| T832300   | Accidental poisoning by lorazepam                           | 1                 |
| T852.00   | Accidental poisoning by local anaesthetic                   | 1                 |
| T852100   | Accidental poisoning by lignocaine                          | 1                 |
| T960000   | Accidental poisoning by lead, unspecified                   | 1                 |
| T960z00   | Accidental poisoning by lead, NOS                           | 1                 |
| T915.00   | Accidental poisoning by lead paints                         | 1                 |
| T960.00   | Accidental poisoning by lead and its compounds and fumes    | 1                 |
| T916000   | Accidental poisoning by lacquers                            | 1                 |
| T806400   | Accidental poisoning by ketoprofen                          | 1                 |
| T921300   | Accidental poisoning by kerosene                            | 1                 |
| T903z00   | Accidental poisoning by isopropyl alcohol NOS               | 1                 |
| T903100   | Accidental poisoning by isopropanol                         | 1                 |
| T964400   | Accidental poisoning by iron compounds                      | 1                 |
| T934z00   | Accidental poisoning by insecticides NOS                    | 1                 |
| T806100   | Accidental poisoning by indomethacin                        | 1                 |
| T840100   | Accidental poisoning by imipramine                          | 1                 |
| T806300   | Accidental poisoning by ibuprofen                           | 1                 |
| T854200   | Accidental poisoning by hyoscine                            | 1                 |
| T941000   | Accidental poisoning by hydrochloric acid                   | 1                 |
| T850100   | Accidental poisoning by hydantoin derivatives               | 1                 |
| T91z.00   | Accidental poisoning by household agents NOS                | 1                 |
| T91..00   | Accidental poisoning by household agents                    | 1                 |
| T880.00   | Accidental poisoning by hormones and synthetic substitutes  | 1                 |
| T800.00   | Accidental poisoning by heroin                              | 1                 |
| T935z00   | Accidental poisoning by herbicides NOS                      | 1                 |
| T935.00   | Accidental poisoning by herbicides                          | 1                 |
| T981300   | Accidental poisoning by heating gas NOS                     | 1                 |
| T831000   | Accidental poisoning by haloperidol                         | 1                 |
| T851200   | Accidental poisoning by halogenated hydrocarbon derivatives | 1                 |
| T841.00   | Accidental poisoning by hallucinogens                       | 1                 |
| T841z00   | Accidental poisoning by hallucinogen NOS                    | 1                 |

| Read code | Description                                                 | Number of studies |
|-----------|-------------------------------------------------------------|-------------------|
| T806000   | Accidental poisoning by gold salts                          | 1                 |
| T966z00   | Accidental poisoning by glues and adhesives NOS             | 1                 |
| T966.00   | Accidental poisoning by glues and adhesives                 | 1                 |
| T966000   | Accidental poisoning by glues                               | 1                 |
| T884.00   | Accidental poisoning by gastrointestinal system drugs       | 1                 |
| T470.00   | Accidental poisoning by gases or fumes on ship              | 1                 |
| T99z.00   | Accidental poisoning by gases and vapours NOS               | 1                 |
| T921100   | Accidental poisoning by gas oils                            | 1                 |
| T97..00   | Accidental poisoning by gas distributed by pipeline         | 1                 |
| T936z00   | Accidental poisoning by fungicides NOS                      | 1                 |
| T936.00   | Accidental poisoning by fungicides                          | 1                 |
| T938.00   | Accidental poisoning by fumigants                           | 1                 |
| T95z.00   | Accidental poisoning by foodstuffs and poisonous plants NOS | 1                 |
| T965100   | Accidental poisoning by fertilisers                         | 1                 |
| T982000   | Accidental poisoning by exhaust gas-stationary farm tractor | 1                 |
| T982z00   | Accidental poisoning by exhaust gas from motor vehicle NOS  | 1                 |
| T982100   | Accidental poisoning by exhaust gas from gas engine         | 1                 |
| T901z00   | Accidental poisoning by ethyl alcohol NOS                   | 1                 |
| T901300   | Accidental poisoning by ethanol, NOS                        | 1                 |
| T8...00   | Accidental poisoning by drugs, medicines and biologicals    | 1                 |
| T882.00   | Accidental poisoning by drugs affecting blood constituents  | 1                 |
| T85z.00   | Accidental poisoning by drugs acting on nervous system NOS  | 1                 |
| T8z..00   | Accidental poisoning by drugs NOS                           | 1                 |
| T914.00   | Accidental poisoning by disinfectants                       | 1                 |
| T935300   | Accidental poisoning by diquat                              | 1                 |
| T930300   | Accidental poisoning by dieldrin                            | 1                 |
| T832100   | Accidental poisoning by diazepam                            | 1                 |
| T800.11   | Accidental poisoning by diamorphine                         | 1                 |
| T887400   | Accidental poisoning by dental drugs                        | 1                 |
| T901000   | Accidental poisoning by denatured alcohol                   | 1                 |
| T938000   | Accidental poisoning by cyanides                            | 1                 |
| T967.00   | Accidental poisoning by cosmetics                           | 1                 |
| T94z.00   | Accidental poisoning by corrosives and caustics NOS         | 1                 |
| T94..00   | Accidental poisoning by corrosives and caustics NEC         | 1                 |
| T940.00   | Accidental poisoning by corrosive aromatics                 | 1                 |
| T964300   | Accidental poisoning by copper salts                        | 1                 |
| T981400   | Accidental poisoning by cooking gas NOS                     | 1                 |
| T802000   | Accidental poisoning by codeine                             | 1                 |
| T852000   | Accidental poisoning by cocaine                             | 1                 |
| T971.00   | Accidental poisoning by coal gas NOS                        | 1                 |
| T853.00   | Accidental poisoning by cholinergics                        | 1                 |
| T830000   | Accidental poisoning by chlorpromazine                      | 1                 |
| T99y000   | Accidental poisoning by chlorine                            | 1                 |
| T832000   | Accidental poisoning by chlordiazepoxide                    | 1                 |
| T930100   | Accidental poisoning by chlordane                           | 1                 |
| T935200   | Accidental poisoning by chlorates                           | 1                 |
| T820.00   | Accidental poisoning by chloral hydrate                     | 1                 |
| T88y000   | Accidental poisoning by central appetite depressants        | 1                 |
| T942z00   | Accidental poisoning by caustic alkalis NOS                 | 1                 |
| T942.00   | Accidental poisoning by caustic alkalis                     | 1                 |
| T883.00   | Accidental poisoning by cardiovascular system drugs         | 1                 |
| T983.00   | Accidental poisoning by carbon monoxide-other domestic fuel | 1                 |
| T970.00   | Accidental poisoning by carbon monoxide from piped gas      | 1                 |



1  
2  
3  
4  
5  
6  
7  
8  
9  
10  
11  
12  
13  
14  
15  
16  
17  
18  
19  
20  
21  
22  
23  
24  
25  
26  
27  
28  
29  
30  
31  
32  
33  
34  
35  
36  
37  
38  
39  
40  
41  
42  
43  
44  
45  
46  
47  
48  
49  
50  
51  
52  
53  
54  
55  
56  
57  
58  
59  
60

| Read code | Description                                                  | Number of studies |
|-----------|--------------------------------------------------------------|-------------------|
| T98y.00   | Accidental poisoning by carbon monoxide from other sources   | 1                 |
| T98yz00   | Accidental poisoning by carbon monoxide from oth source NOS  | 1                 |
| T98z.00   | Accidental poisoning by carbon monoxide NOS                  | 1                 |
| T983z00   | Accidental poisoning by carbon monoxide - domestic fuel NOS  | 1                 |
| T940000   | Accidental poisoning by carbolic acid                        | 1                 |
| T932100   | Accidental poisoning by carbaryl                             | 1                 |
| T932.00   | Accidental poisoning by carbamates                           | 1                 |
| T841000   | Accidental poisoning by cannabis derivatives                 | 1                 |
| T842100   | Accidental poisoning by caffeine                             | 1                 |
| T964200   | Accidental poisoning by cadmium and its compounds            | 1                 |
| T980100   | Accidental poisoning by butane                               | 1                 |
| T993000   | Accidental poisoning by bromobenzyl cyanide                  | 1                 |
| T822.00   | Accidental poisoning by bromine compounds                    | 1                 |
| T822000   | Accidental poisoning by bromides                             | 1                 |
| T964100   | Accidental poisoning by brass fumes                          | 1                 |
| T964000   | Accidental poisoning by beryllium and its compounds          | 1                 |
| T832.00   | Accidental poisoning by benzodiazepine-based tranquillisers  | 1                 |
| T930000   | Accidental poisoning by benzene hexachlorine                 | 1                 |
| T924000   | Accidental poisoning by benzene                              | 1                 |
| T81z.00   | Accidental poisoning by barbiturates NOS                     | 1                 |
| T81..00   | Accidental poisoning by barbiturates                         | 1                 |
| T811.00   | Accidental poisoning by barbitone                            | 1                 |
| T854000   | Accidental poisoning by atropine                             | 1                 |
| T803000   | Accidental poisoning by aspirin                              | 1                 |
| T963000   | Accidental poisoning by arsenic, unspecified                 | 1                 |
| T963100   | Accidental poisoning by arsenic compounds                    | 1                 |
| T963.00   | Accidental poisoning by arsenic and its compounds and fumes  | 1                 |
| T804.00   | Accidental poisoning by aromatic analgesics NEC              | 1                 |
| T806z00   | Accidental poisoning by antirheumatics NOS                   | 1                 |
| T806.00   | Accidental poisoning by antirheumatics                       | 1                 |
| T840z00   | Accidental poisoning by antidepressants NOS                  | 1                 |
| T840.00   | Accidental poisoning by antidepressants                      | 1                 |
| T850z00   | Accidental poisoning by anticonvulsant/anti-parkin drug NOS  | 1                 |
| T850.00   | Accidental poisoning by anticonvulsant + anti-parkinson drug | 1                 |
| T850.11   | Accidental poisoning by anticonvulsant                       | 1                 |
| T854.00   | Accidental poisoning by anticholinergics                     | 1                 |
| T86..00   | Accidental poisoning by antibiotics                          | 1                 |
| T850.12   | Accidental poisoning by anti-parkinsonism drug               | 1                 |
| T87..00   | Accidental poisoning by anti-infectives                      | 1                 |
| T80..00   | Accidental poisoning by analgesics,antipyretic,antirheumatic | 1                 |
| T80z.00   | Accidental poisoning by analgesics,antipyretic,antirheum NOS | 1                 |
| T842000   | Accidental poisoning by amphetamine                          | 1                 |
| T840000   | Accidental poisoning by amitriptyline                        | 1                 |
| T900.00   | Accidental poisoning by alcoholic beverages                  | 1                 |
| T90..00   | Accidental poisoning by alcohol, NEC                         | 1                 |
| T90z.00   | Accidental poisoning by alcohol NOS                          | 1                 |
| T93..00   | Accidental poisoning by agricultural chemical preparations   | 1                 |
| T855.00   | Accidental poisoning by adrenergics                          | 1                 |
| T855000   | Accidental poisoning by adrenalin                            | 1                 |
| T941z00   | Accidental poisoning by acids NOS                            | 1                 |
| T941.00   | Accidental poisoning by acids                                | 1                 |
| T981000   | Accidental poisoning by acetylene                            | 1                 |
| T930200   | Accidental poisoning by DDT                                  | 1                 |

| Read code | Description                                                  | Number of studies |
|-----------|--------------------------------------------------------------|-------------------|
| T983300   | Accidental poisoning by CO- kerosene in domestic stove/fire  | 1                 |
| T983100   | Accidental poisoning by CO- coke in domestic stove/fireplace | 1                 |
| T983000   | Accidental poisoning by CO- coal in domestic stove/fireplace | 1                 |
| T98y100   | Accidental poisoning by CO - kiln vapour                     | 1                 |
| T98y200   | Accidental poisoning by CO - fuels in industrial use         | 1                 |
| T98y000   | Accidental poisoning by CO - blast furnace gas               | 1                 |
| T93z.00   | Accidental poisoning agricultural chemical preparations NOS  | 1                 |
| T9z..00   | Accidental poisoning NOS                                     | 1                 |
| T77z.00   | Accident/poisoning occurred in residential institution NOS   | 1                 |
| T85y.00   | Accid. poisoning by other drugs acting on nervous system OS  | 1                 |
| T470500   | Accid poison gas/fume on ship - swimmer injured              | 1                 |
| SL24011   | ACTH - adrenocorticotrophic hormone poisoning                | 1                 |

**Table 10. ICD codes used in the studies of anxiety.**

| <b>Study</b> | <b>Databases</b> | <b>ICD version</b> | <b>List of codes</b> |
|--------------|------------------|--------------------|----------------------|
| Bouras, 2016 | CPRD + HES       | ICD-10             | F40-F48              |

CPRD – Clinical Practice Research Datalink; HES – Hospital Episode Statistics; ICD - International Classification of Diseases.

For peer review only

**Table 11. ICD codes used in the studies of depression.**

| <b>Study</b>        | <b>Databases</b> | <b>ICD version</b> | <b>List of codes</b>   |
|---------------------|------------------|--------------------|------------------------|
| Bouras, 2016        | CPRD + HES       | ICD-10             | F32, F33               |
| Jenkins-Jones, 2018 | CPRD + HES       | ICD-10             | F32, F33, F41.2, F92.0 |

CPRD – Clinical Practice Research Datalink; HES – Hospital Episode Statistics; ICD - International Classification of Diseases.

For peer review only

**Table 12. ICD codes used in the studies of dementia.**

| <b>Study</b> | <b>Databases</b> | <b>ICD version</b> | <b>List of codes</b>                               |
|--------------|------------------|--------------------|----------------------------------------------------|
| Brown, 2016  | CPRD + HES       | ICD-10             | E512, F00, F01, F02, F03, F10.6, F10.7, G30, G31.0 |
| Emdin, 2016  | CPRD + HES       | ICD-10             | F01                                                |

CPRD – Clinical Practice Research Datalink; HES – Hospital Episode Statistics; ICD - International Classification of Diseases.

For peer review only

**Table 13. ICD codes used in the studies of fatal self-harm.**

| <b>Study</b>     | <b>ICD version</b> | <b>List of codes</b>                               |
|------------------|--------------------|----------------------------------------------------|
| Carr, 2017       | ICD-10             | V01-Y98                                            |
| Coupland, 2015   | ICD-10             | not provided                                       |
| Doyle, 2016      | ICD-10             | X60-X84, Y10-34 (excluding Y33.9), Y87.0 and Y87.2 |
| Lalmohamed, 2012 | ICD-10             | V01-Y99                                            |
| Meier, 2004      | ICD-10             | not provided                                       |
| Schuerch, 2016   | ICD-10             | X60-X84, Y10-Y34                                   |
| Thomas, 2013     | ICD-10             | X60-X84, Y10-34 (excluding Y33.9)                  |
| Webb, 2012       | ICD-10             | X60-X84, Y10-34 (excluding Y33.9)                  |
| Windfuhr, 2016   | ICD-10             | X60-X84, Y10-34 (excluding Y33.9), Y87.0 and Y87.2 |

ICD - International Classification of Diseases

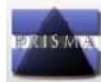

# PRISMA 2009 Checklist

| Section/topic                      | #  | Checklist item                                                                                                                                                                                                                                                                                              | Reported on page # |
|------------------------------------|----|-------------------------------------------------------------------------------------------------------------------------------------------------------------------------------------------------------------------------------------------------------------------------------------------------------------|--------------------|
| <b>TITLE</b>                       |    |                                                                                                                                                                                                                                                                                                             |                    |
| Title                              | 1  | Identify the report as a systematic review, meta-analysis, or both.                                                                                                                                                                                                                                         | 1                  |
| <b>ABSTRACT</b>                    |    |                                                                                                                                                                                                                                                                                                             |                    |
| Structured summary                 | 2  | Provide a structured summary including, as applicable: background; objectives; data sources; study eligibility criteria, participants, and interventions; study appraisal and synthesis methods; results; limitations; conclusions and implications of key findings; systematic review registration number. | 2                  |
| <b>INTRODUCTION</b>                |    |                                                                                                                                                                                                                                                                                                             |                    |
| Rationale                          | 3  | Describe the rationale for the review in the context of what is already known.                                                                                                                                                                                                                              | 5                  |
| Objectives                         | 4  | Provide an explicit statement of questions being addressed with reference to participants, interventions, comparisons, outcomes, and study design (PICOS).                                                                                                                                                  | 5                  |
| <b>METHODS</b>                     |    |                                                                                                                                                                                                                                                                                                             |                    |
| Protocol and registration          | 5  | Indicate if a review protocol exists, if and where it can be accessed (e.g., Web address), and, if available, provide registration information including registration number.                                                                                                                               | None exists        |
| Eligibility criteria               | 6  | Specify study characteristics (e.g., PICOS, length of follow-up) and report characteristics (e.g., years considered, language, publication status) used as criteria for eligibility, giving rationale.                                                                                                      | 6-7                |
| Information sources                | 7  | Describe all information sources (e.g., databases with dates of coverage, contact with study authors to identify additional studies) in the search and date last searched.                                                                                                                                  | 6                  |
| Search                             | 8  | Present full electronic search strategy for at least one database, including any limits used, such that it could be repeated.                                                                                                                                                                               | Appendix 1         |
| Study selection                    | 9  | State the process for selecting studies (i.e., screening, eligibility, included in systematic review, and, if applicable, included in the meta-analysis).                                                                                                                                                   | 7                  |
| Data collection process            | 10 | Describe method of data extraction from reports (e.g., piloted forms, independently, in duplicate) and any processes for obtaining and confirming data from investigators.                                                                                                                                  | 7                  |
| Data items                         | 11 | List and define all variables for which data were sought (e.g., PICOS, funding sources) and any assumptions and simplifications made.                                                                                                                                                                       | 7                  |
| Risk of bias in individual studies | 12 | Describe methods used for assessing risk of bias of individual studies (including specification of whether this was done at the study or outcome level), and how this information is to be used in any data synthesis.                                                                                      | Not applicable     |
| Summary measures                   | 13 | State the principal summary measures (e.g., risk ratio, difference in means).                                                                                                                                                                                                                               | Not applicable     |

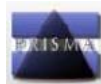

# PRISMA 2009 Checklist

|                      |    |                                                                                                                                                           |     |
|----------------------|----|-----------------------------------------------------------------------------------------------------------------------------------------------------------|-----|
| Synthesis of results | 14 | Describe the methods of handling data and combining results of studies, if done, including measures of consistency (e.g., $I^2$ ) for each meta-analysis. | 7-8 |
|----------------------|----|-----------------------------------------------------------------------------------------------------------------------------------------------------------|-----|

Page 1 of 2

| Section/topic                                                                                                                              | #  | Checklist item                                                                                                                                                                                           | Reported on page # |
|--------------------------------------------------------------------------------------------------------------------------------------------|----|----------------------------------------------------------------------------------------------------------------------------------------------------------------------------------------------------------|--------------------|
| Risk of bias across studies                                                                                                                | 15 | Specify any assessment of risk of bias that may affect the cumulative evidence (e.g., publication bias, selective reporting within studies).                                                             | Not applicable     |
| Additional analyses                                                                                                                        | 16 | Describe methods of additional analyses (e.g., sensitivity or subgroup analyses, meta-regression), if done, indicating which were pre-specified.                                                         | Not applicable     |
| <b>RESULTS</b>                                                                                                                             |    |                                                                                                                                                                                                          |                    |
| Study selection                                                                                                                            | 17 | Give numbers of studies screened, assessed for eligibility, and included in the review, with reasons for exclusions at each stage, ideally with a flow diagram.                                          | Fig 1              |
| Study characteristics                                                                                                                      | 18 | For each study, present characteristics for which data were extracted (e.g., study size, PICOS, follow-up period) and provide the citations.                                                             | App. 3-10          |
| Risk of bias within studies                                                                                                                | 19 | Present data on risk of bias of each study and, if available, any outcome level assessment (see item 12).                                                                                                | Not applicable     |
| Results of individual studies                                                                                                              | 20 | For all outcomes considered (benefits or harms), present, for each study: (a) simple summary data for each intervention group (b) effect estimates and confidence intervals, ideally with a forest plot. | App. 11-22         |
| Synthesis of results                                                                                                                       | 21 | Present results of each meta-analysis done, including confidence intervals and measures of consistency.                                                                                                  | Not applicable     |
| Risk of bias across studies                                                                                                                | 22 | Present results of any assessment of risk of bias across studies (see Item 15).                                                                                                                          | Not applicable     |
| Additional analysis                                                                                                                        | 23 | Give results of additional analyses, if done (e.g., sensitivity or subgroup analyses, meta-regression [see Item 16]).                                                                                    | Not applicable     |
| <b>DISCUSSION</b>                                                                                                                          |    |                                                                                                                                                                                                          |                    |
| Summary of evidence                                                                                                                        | 24 | Summarize the main findings including the strength of evidence for each main outcome; consider their relevance to key groups (e.g., healthcare providers, users, and policy makers).                     | 14                 |
| Limitations                                                                                                                                | 25 | Discuss limitations at study and outcome level (e.g., risk of bias), and at review-level (e.g., incomplete retrieval of identified research, reporting bias).                                            | 14-15              |
| Conclusions                                                                                                                                | 26 | Provide a general interpretation of the results in the context of other evidence, and implications for future research.                                                                                  | 16-19              |
| <b>FUNDING</b>                                                                                                                             |    |                                                                                                                                                                                                          |                    |
| For peer review only - <a href="http://bmjopen.bmj.com/site/about/guidelines.xhtml">http://bmjopen.bmj.com/site/about/guidelines.xhtml</a> |    |                                                                                                                                                                                                          |                    |



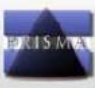

# PRISMA 2009 Checklist

1  
2  
3  
4  
5  
6  
7  
8  
9  
10  
11  
12  
13  
14  
15  
16  
17  
18  
19  
20  
21  
22  
23  
24  
25  
26  
27  
28  
29  
30  
31  
32  
33  
34  
35  
36  
37  
38  
39  
40  
41  
42  
43  
44  
45  
46  
47

|         |    |                                                                                                                                            |   |
|---------|----|--------------------------------------------------------------------------------------------------------------------------------------------|---|
| Funding | 27 | Describe sources of funding for the systematic review and other support (e.g., supply of data); role of funders for the systematic review. | 3 |
|---------|----|--------------------------------------------------------------------------------------------------------------------------------------------|---|

*From:* Moher D, Liberati A, Tetzlaff J, Altman DG, The PRISMA Group (2009). Preferred Reporting Items for Systematic Reviews and Meta-Analyses: The PRISMA Statement. PLoS Med 6(7): e1000097. doi:10.1371/journal.pmed1000097

For more information, visit: [www.prisma-statement.org](http://www.prisma-statement.org).

For peer review only
