# Supplementary material for: Identification of mental health and quality of life outcomes in primary care databases in the UK: a systematic review
Source: PubMed Central journal article supplement (PMC6609128; doi:10.1136/bmjopen-2019-029227), 2019-07-02
Supplement: bmjopen-2019-029227supp004.pdf [file bmjopen-2019-029227supp004.pdf]

**Table 1. List of Read codes used in the studies of anxiety.**

| <b>Read code</b> | <b>Description</b>                                           | <b>Number of studies</b> |
|------------------|--------------------------------------------------------------|--------------------------|
| Eu41.00          | [X]Other anxiety disorders                                   | 5                        |
| Eu41100          | [X]Generalized anxiety disorder                              | 5                        |
| Eu41z11          | [X]Anxiety NOS                                               | 5                        |
| Eu41000          | [X]Panic disorder [episodic paroxysmal anxiety]              | 4                        |
| Eu05400          | [X]Organic anxiety disorder                                  | 4                        |
| Eu41112          | [X]Anxiety reaction                                          | 4                        |
| Eu41111          | [X]Anxiety neurosis                                          | 4                        |
| Eu41z00          | [X]Anxiety disorder, unspecified                             | 4                        |
| E202.12          | Phobic anxiety                                               | 4                        |
| E200200          | Generalised anxiety disorder                                 | 4                        |
| E200.00          | Anxiety states                                               | 4                        |
| E200000          | Anxiety state unspecified                                    | 4                        |
| E200z00          | Anxiety state NOS                                            | 4                        |
| Eu40.00          | [X]Phobic anxiety disorders                                  | 3                        |
| Eu40z00          | [X]Phobic anxiety disorder, unspecified                      | 3                        |
| Eu41012          | [X]Panic state                                               | 3                        |
| Eu41011          | [X]Panic attack                                              | 3                        |
| Eu41y00          | [X]Other specified anxiety disorders                         | 3                        |
| Eu41300          | [X]Other mixed anxiety disorders                             | 3                        |
| Eu41211          | [X]Mild anxiety depression                                   | 3                        |
| Eu41113          | [X]Anxiety state                                             | 3                        |
| E200500          | Recurrent anxiety                                            | 3                        |
| E200100          | Panic disorder                                               | 3                        |
| E200111          | Panic attack                                                 | 3                        |
| E200400          | Chronic anxiety                                              | 3                        |
| 1B1V.00          | C/O - panic attack                                           | 3                        |
| 1B13.11          | Anxiousness - symptom                                        | 3                        |
| 1B13.00          | Anxiousness                                                  | 3                        |
| E200300          | Anxiety with depression                                      | 3                        |
| Eu93200          | [X]Social anxiety disorder of childhood                      | 2                        |
| Eu34114          | [X]Persistant anxiety depression                             | 2                        |
| Eu40012          | [X]Panic disorder with agoraphobia                           | 2                        |
| Eu40y00          | [X]Other phobic anxiety disorders                            | 2                        |
| Eu41200          | [X]Mixed anxiety and depressive disorder                     | 2                        |
| Eu93y12          | [X]Childhood overanxious disorder                            | 2                        |
| Eu41y11          | [X]Anxiety hysteria                                          | 2                        |
| E2D0.00          | Disturbance of anxiety and fearfulness childhood/adolescent  | 2                        |
| E2D0z00          | Disturbance anxiety and fearfulness childhood/adolescent NOS | 2                        |
| E202100          | Agoraphobia with panic attacks                               | 2                        |
| E292400          | Adjustment reaction with anxious mood                        | 2                        |
| E280.00          | Acute panic state due to acute stress reaction               | 2                        |
| Z4I7.00          | Acknowledging anxiety                                        | 2                        |
| Eu40100          | [X]Social phobias                                            | 1                        |
| Eu40112          | [X]Social neurosis                                           | 1                        |
| Eu93000          | [X]Separation anxiety disorder of childhood                  | 1                        |
| Eu42100          | [X]Predominantly compulsive acts [obsessional rituals]       | 1                        |
| Eu93100          | [X]Phobic anxiety disorder of childhood                      | 1                        |
| Eu42.12          | [X]Obsessive-compulsive neurosis                             | 1                        |
| Eu42.00          | [X]Obsessive - compulsive disorder                           | 1                        |
| Eu45215          | [X]Nosophobia                                                | 1                        |
| Eu46z11          | [X]Neurosis NOS                                              | 1                        |

| <b>Read code</b> | <b>Description</b>                                   | <b>Number of studies</b> |
|------------------|------------------------------------------------------|--------------------------|
| Eu40300          | [X]Needle phobia                                     | 1                        |
| Eu45213          | [X]Hypochondriacal neurosis                          | 1                        |
| Eu45212          | [X]Dysmorphophobia nondelusional                     | 1                        |
| Eu51511          | [X]Dream anxiety disorder                            | 1                        |
| Eu40213          | [X]Claustrophobia                                    | 1                        |
| Eu60600          | [X]Anxious [avoidant] personality disorder           | 1                        |
| Eu42.11          | [X]Anankastic neurosis                               | 1                        |
| Eu40011          | [X]Agoraphobia without history of panic disorder     | 1                        |
| Eu40000          | [X]Agoraphobia                                       | 1                        |
| R2y2.00          | [D]Nervousness                                       | 1                        |
| R2y2.12          | [D]Nervous tension                                   | 1                        |
| R2y2.11          | [D]Nerves                                            | 1                        |
| 1BK..00          | Worried                                              | 1                        |
| 1B12.12          | Tension - nervous                                    | 1                        |
| E202300          | Social phobia, fear of eating in public              | 1                        |
| E112000          | Single major depressive episode, unspecified         | 1                        |
| E292000          | Separation anxiety disorder                          | 1                        |
| Z4I7211          | Reducing anxiety                                     | 1                        |
| Z4I7100          | Recognising anxiety                                  | 1                        |
| E29y100          | Other post-traumatic stress disorder                 | 1                        |
| E203z00          | Obsessive-compulsive disorder NOS                    | 1                        |
| E203100          | Obsessional neurosis                                 | 1                        |
| 225J.00          | O/E - panic attack                                   | 1                        |
| 2258.00          | O/E - anxious                                        | 1                        |
| 1465.00          | H/O: depression                                      | 1                        |
| 1466.00          | H/O: anxiety state                                   | 1                        |
| 1B1..00          | General nervous symptoms                             | 1                        |
| E275711          | Compulsive water drinking                            | 1                        |
| E203000          | Compulsive neurosis                                  | 1                        |
| 1P3..00          | Compulsive behaviour                                 | 1                        |
| E202800          | Claustrophobia                                       | 1                        |
| E2D0000          | Childhood and adolescent overanxiousness disturbance | 1                        |
| 1B13.12          | Anxious                                              | 1                        |
| 8G94.00          | Anxiety management training                          | 1                        |
| Z4L1.00          | Anxiety counselling                                  | 1                        |
| E203.11          | Anancastic neurosis                                  | 1                        |
| Z4I7200          | Alleviating anxiety                                  | 1                        |
| E202200          | Agoraphobia without mention of panic attacks         | 1                        |
| 1B12.00          | 'Nerves' - nervousness                               | 1                        |
| 1B12.11          | 'Nerves'                                             | 1                        |

**Table 2. ICD codes used in the studies of anxiety.**

| <b>Study</b> | <b>Databases</b> | <b>ICD version</b> | <b>List of codes</b> |
|--------------|------------------|--------------------|----------------------|
| Bouras, 2016 | CPRD + HES       | ICD-10             | F40-F48              |

CPRD – Clinical Practice Research Datalink; HES – Hospital Episode Statistics; ICD - International Classification of Diseases.

**Table 3. List of Read codes used in the studies of depression.**

| <b>Read code</b> | <b>Description</b>                                           | <b>Number of studies</b> |
|------------------|--------------------------------------------------------------|--------------------------|
| E112.00          | Single major depressive episode                              | 14                       |
| E112000          | Single major depressive episode, unspecified                 | 14                       |
| E112100          | Single major depressive episode, mild                        | 14                       |
| E112200          | Single major depressive episode, moderate                    | 14                       |
| E112300          | Single major depressive episode, severe, without psychosis   | 14                       |
| E112z00          | Single major depressive episode NOS                          | 14                       |
| E135.00          | Agitated depression                                          | 14                       |
| E112.11          | Agitated depression                                          | 13                       |
| E112.12          | Endogenous depression first episode                          | 13                       |
| E112.13          | Endogenous depression first episode                          | 13                       |
| E112.14          | Endogenous depression                                        | 13                       |
| E112500          | Single major depressive episode, partial or unspec remission | 13                       |
| E2B..00          | Depressive disorder NEC                                      | 13                       |
| E2B1.00          | Chronic depression                                           | 13                       |
| Eu32.00          | [X]Depressive episode                                        | 13                       |
| E113.00          | Recurrent major depressive episode                           | 12                       |
| E11y200          | Atypical depressive disorder                                 | 12                       |
| E11z200          | Masked depression                                            | 12                       |
| Eu32.11          | [X]Single episode of depressive reaction                     | 12                       |
| Eu32.12          | [X]Single episode of psychogenic depression                  | 12                       |
| Eu32.13          | [X]Single episode of reactive depression                     | 12                       |
| Eu32000          | [X]Mild depressive episode                                   | 12                       |
| Eu32100          | [X]Moderate depressive episode                               | 12                       |
| Eu32200          | [X]Severe depressive episode without psychotic symptoms      | 12                       |
| Eu32400          | [X]Mild depression                                           | 12                       |
| Eu32y00          | [X]Other depressive episodes                                 | 12                       |
| Eu32z00          | [X]Depressive episode, unspecified                           | 12                       |
| Eu33.00          | [X]Recurrent depressive disorder                             | 12                       |
| E112400          | Single major depressive episode, severe, with psychosis      | 11                       |
| E113.11          | Endogenous depression - recurrent                            | 11                       |
| E130.11          | Psychotic reactive depression                                | 11                       |
| Eu32212          | [X]Single episode major depression w/out psychotic symptoms  | 11                       |
| Eu32y11          | [X]Atypical depression                                       | 11                       |
| Eu32z11          | [X]Depression NOS                                            | 11                       |
| Eu32z12          | [X]Depressive disorder NOS                                   | 11                       |
| 1B17.00          | Depressed                                                    | 10                       |
| E112600          | Single major depressive episode, in full remission           | 10                       |
| E113000          | Recurrent major depressive episodes, unspecified             | 10                       |
| E113100          | Recurrent major depressive episodes, mild                    | 10                       |
| E113200          | Recurrent major depressive episodes, moderate                | 10                       |
| E113300          | Recurrent major depressive episodes, severe, no psychosis    | 10                       |
| E113500          | Recurrent major depressive episodes,partial/unspec remission | 10                       |
| E113700          | Recurrent depression                                         | 10                       |
| E113z00          | Recurrent major depressive episode NOS                       | 10                       |
| E130.00          | Reactive depressive psychosis                                | 10                       |
| E200300          | Anxiety with depression                                      | 10                       |
| E291.00          | Prolonged depressive reaction                                | 10                       |
| Eu32211          | [X]Single episode agitated depressn w/out psychotic symptoms | 10                       |
| Eu32213          | [X]Single episode vital depression w/out psychotic symptoms  | 10                       |
| Eu32311          | [X]Single episode of major depression and psychotic symptoms | 10                       |
| Eu32313          | [X]Single episode of psychotic depression                    | 10                       |

| Read code | Description                                                  | Number of studies |
|-----------|--------------------------------------------------------------|-------------------|
| Eu32y12   | [X]Single episode of masked depression NOS                   | 10                |
| Eu32z13   | [X]Prolonged single episode of reactive depression           | 10                |
| Eu33.11   | [X]Recurrent episodes of depressive reaction                 | 10                |
| Eu33.12   | [X]Recurrent episodes of psychogenic depression              | 10                |
| Eu33.13   | [X]Recurrent episodes of reactive depression                 | 10                |
| Eu33000   | [X]Recurrent depressive disorder, current episode mild       | 10                |
| Eu33100   | [X]Recurrent depressive disorder, current episode moderate   | 10                |
| Eu33211   | [X]Endogenous depression without psychotic symptoms          | 10                |
| Eu33y00   | [X]Other recurrent depressive disorders                      | 10                |
| Eu33z00   | [X]Recurrent depressive disorder, unspecified                | 10                |
| Eu34114   | [X]Persistant anxiety depression                             | 10                |
| 1B1U.00   | Symptoms of depression                                       | 9                 |
| 1B1U.11   | Depressive symptoms                                          | 9                 |
| E113600   | Recurrent major depressive episodes, in full remission       | 9                 |
| Eu32300   | [X]Severe depressive episode with psychotic symptoms         | 9                 |
| Eu32312   | [X]Single episode of psychogenic depressive psychosis        | 9                 |
| Eu32314   | [X]Single episode of reactive depressive psychosis           | 9                 |
| Eu32500   | [X]Major depression, mild                                    | 9                 |
| Eu32600   | [X]Major depression, moderately severe                       | 9                 |
| Eu32700   | [X]Major depression, severe without psychotic symptoms       | 9                 |
| Eu32z14   | [X] Reactive depression NOS                                  | 9                 |
| Eu33214   | [X]Vital depression, recurrent without psychotic symptoms    | 9                 |
| Eu33311   | [X]Endogenous depression with psychotic symptoms             | 9                 |
| Eu33z11   | [X]Monopolar depression NOS                                  | 9                 |
| Eu34113   | [X]Neurotic depression                                       | 9                 |
| Eu41200   | [X]Mixed anxiety and depressive disorder                     | 9                 |
| Eu41211   | [X]Mild anxiety depression                                   | 9                 |
| 1B17.11   | C/O - feeling depressed                                      | 8                 |
| E113400   | Recurrent major depressive episodes, severe, with psychosis  | 8                 |
| E204.00   | Neurotic depression reactive type                            | 8                 |
| Eu33200   | [X]Recurr depress disorder cur epi severe without psyc sympt | 8                 |
| Eu33212   | [X]Major depression, recurrent without psychotic symptoms    | 8                 |
| Eu33400   | [X]Recurrent depressive disorder, currently in remission     | 8                 |
| Eu34111   | [X]Depressive neurosis                                       | 8                 |
| Eu3y111   | [X]Recurrent brief depressive episodes                       | 8                 |
| 1BT..00   | Depressed mood                                               | 7                 |
| 2257.00   | O/E - depressed                                              | 7                 |
| E11..12   | Depressive psychoses                                         | 7                 |
| Eu32800   | [X]Major depression, severe with psychotic symptoms          | 7                 |
| Eu33.14   | [X]Seasonal depressive disorder                              | 7                 |
| Eu33313   | [X]Recurr severe episodes/major depression+psychotic symptom | 7                 |
| Eu33314   | [X]Recurr severe episodes/psychogenic depressive psychosis   | 7                 |
| Eu33315   | [X]Recurrent severe episodes of psychotic depression         | 7                 |
| Eu33316   | [X]Recurrent severe episodes/reactive depressive psychosis   | 7                 |
| 9H90.00   | Depression annual review                                     | 6                 |
| 9H91.00   | Depression medication review                                 | 6                 |
| 9H92.00   | Depression interim review                                    | 6                 |
| 9HA0.00   | On depression register                                       | 6                 |
| E290.00   | Brief depressive reaction                                    | 6                 |
| Eu33300   | [X]Recurrent depress disorder cur epi severe with psyc symp  | 6                 |
| Eu34100   | [X]Dysthymia                                                 | 6                 |
| E118.00   | Seasonal affective disorder                                  | 5                 |
| E204.11   | Postnatal depression                                         | 5                 |

| Read code | Description                                                  | Number of studies |
|-----------|--------------------------------------------------------------|-------------------|
| E290z00   | Brief depressive reaction NOS                                | 5                 |
| Eu53011   | [X]Postnatal depression NOS                                  | 5                 |
| Eu53012   | [X]Postpartum depression NOS                                 | 5                 |
| 1465.00   | H/O: depression                                              | 4                 |
| 1BQ..00   | Loss of capacity for enjoyment                               | 4                 |
| 8HHq.00   | Referral for guided self-help for depression                 | 4                 |
| E02y300   | Drug-induced depressive state                                | 4                 |
| Eu33.15   | [X]SAD - Seasonal affective disorder                         | 4                 |
| R007z13   | [D]Postoperative depression                                  | 4                 |
| 1BP0.00   | Loss of interest in previously enjoyable activity            | 3                 |
| 1BT..11   | Low mood                                                     | 3                 |
| 1BU..00   | Loss of hope for the future                                  | 3                 |
| 212S.00   | Depression resolved                                          | 3                 |
| 8CAa.00   | Patient given advice about management of depression          | 3                 |
| 9Ov0.00   | Depression monitoring first letter                           | 3                 |
| 9Ov1.00   | Depression monitoring second letter                          | 3                 |
| 9Ov2.00   | Depression monitoring third letter                           | 3                 |
| 9Ov3.00   | Depression monitoring verbal invite                          | 3                 |
| 9Ov4.00   | Depression monitoring telephone invite                       | 3                 |
| 9k4..00   | Depression - enhanced services administration                | 3                 |
| E001300   | Presenile dementia with depression                           | 3                 |
| E002100   | Senile dementia with depression                              | 3                 |
| E2B0.00   | Postviral depression                                         | 3                 |
| Eu20400   | [X]Post-schizophrenic depression                             | 3                 |
| Eu34112   | [X]Depressive personality disorder                           | 3                 |
| Eu92000   | [X]Depressive conduct disorder                               | 3                 |
| 1JJ..00   | Suspected depression                                         | 2                 |
| 8BK0.00   | Depression management programme                              | 2                 |
| 9HA1.00   | Removed from depression register                             | 2                 |
| 9Ov..00   | Depression monitoring administration                         | 2                 |
| 9k40.00   | Depression - enhanced service completed                      | 2                 |
| 9kQ..00   | On full dose long term treatment depression - enh serv admin | 2                 |
| E115.00   | Bipolar affective disorder, currently depressed              | 2                 |
| E11y.00   | Other and unspecified manic-depressive psychoses             | 2                 |
| E211200   | Depressive personality disorder                              | 2                 |
| Eu25100   | [X]Schizoaffective disorder, depressive type                 | 2                 |
| Eu25111   | [X]Schizoaffective psychosis, depressive type                | 2                 |
| Eu25112   | [X]Schizophreniform psychosis, depressive type               | 2                 |
| Eu32B00   | [X]Antenatal depression                                      | 2                 |
| Eu33213   | [X]Manic-depress psychosis,depressed,no psychotic symptoms   | 2                 |
| Eu34y00   | [X]Other persistent mood affective disorders                 | 2                 |
| Eu34z00   | [X]Persistent mood affective disorder, unspecified           | 2                 |
| Eu3y100   | [X]Other recurrent mood affective disorders                  | 2                 |
| Eu3z.00   | [X]Unspecified mood affective disorder                       | 2                 |
| 1645.00   | Excessive fluid intake                                       | 1                 |
| 1B1J.00   | Emotional problem                                            | 1                 |
| 1B1J.11   | Emotional upset                                              | 1                 |
| 1BO..00   | Mood swings                                                  | 1                 |
| 1BP..00   | Loss of interest                                             | 1                 |
| 1BT..12   | Sad mood                                                     | 1                 |
| 1S4..00   | Mood observations                                            | 1                 |
| 1S40.00   | Dysphoric mood                                               | 1                 |
| 388J.00   | Hospital anxiety and depression scale                        | 1                 |

| Read code | Description                                                  | Number of studies |
|-----------|--------------------------------------------------------------|-------------------|
| 388K.00   | Geriatric depression scale                                   | 1                 |
| 388P.00   | HAD scale: depression score                                  | 1                 |
| 388g.00   | Beck depression inventory second edition score               | 1                 |
| 62T1.00   | Puerperal depression                                         | 1                 |
| 6896.00   | Depression screening using questions                         | 1                 |
| 8O82.00   | Emotional and psychosocial support and advice                | 1                 |
| 9ON3.00   | Stress monitoring default                                    | 1                 |
| 9ON4.00   | Stress monitoring 1st letter                                 | 1                 |
| 9ON5.00   | Stress monitoring 2nd letter                                 | 1                 |
| 9ON6.00   | Stress monitoring 3rd letter                                 | 1                 |
| 9ON7.00   | Stress monitoring verbal inv.                                | 1                 |
| 9ON8.00   | Stress monitoring phone invite                               | 1                 |
| 9ON9.00   | Stress monitoring deleted                                    | 1                 |
| 9ONA.00   | Stress monitoring check done                                 | 1                 |
| 9ONZ.00   | Stress monitoring admin.NOS                                  | 1                 |
| E002.00   | Senile dementia with depressive or paranoid features         | 1                 |
| E002z00   | Senile dementia with depressive or paranoid features NOS     | 1                 |
| E004300   | Arteriosclerotic dementia with depression                    | 1                 |
| E115.11   | Manic-depressive - now depressed                             | 1                 |
| E115000   | Bipolar affective disorder, currently depressed, unspecified | 1                 |
| E115100   | Bipolar affective disorder, currently depressed, mild        | 1                 |
| E115200   | Bipolar affective disorder, currently depressed, moderate    | 1                 |
| E115300   | Bipolar affect disord, now depressed, severe, no psychosis   | 1                 |
| E115400   | Bipolar affect disord, now depressed, severe with psychosis  | 1                 |
| E115500   | Bipolar affect disord, now depressed, part/unspec remission  | 1                 |
| E115600   | Bipolar affective disorder, now depressed, in full remission | 1                 |
| E115z00   | Bipolar affective disorder, currently depressed, NOS         | 1                 |
| E11y000   | Unspecified manic-depressive psychoses                       | 1                 |
| E11z100   | Rebound mood swings                                          | 1                 |
| E222      |                                                              | 1                 |
| E283.00   | Other acute stress reactions                                 | 1                 |
| E283z00   | Other acute stress reaction NOS                              | 1                 |
| E284.00   | Stress reaction causing mixed disturbance of emotion/conduct | 1                 |
| E28z.00   | Acute stress reaction NOS                                    | 1                 |
| E292.00   | Adjustment reaction, predominant disturbance other emotions  | 1                 |
| E292400   | Adjustment reaction with anxious mood                        | 1                 |
| E292y00   | Adjustment reaction with mixed disturbance of emotion        | 1                 |
| E292z00   | Adjustment reaction with disturbance of other emotion NOS    | 1                 |
| E294.00   | Adjustment reaction with disturbance emotion and conduct     | 1                 |
| E2C4.00   | Mixed disturbance of conduct and emotion                     | 1                 |
| E2C4z00   | Mixed disturbance of conduct and emotion NOS                 | 1                 |
| E35       |                                                              | 1                 |
| E4J5      |                                                              | 1                 |
| Eu02z16   | [X] Senile dementia, depressed or paranoid type              | 1                 |
| Eu3..00   | [X]Mood - affective disorders                                | 1                 |
| Eu31.11   | [X]Manic-depressive illness                                  | 1                 |
| Eu31300   | [X]Bipolar affect disorder cur epi mild or moderate depressn | 1                 |
| Eu31400   | [X]Bipol aff disord, curr epis sev depress, no psychot symp  | 1                 |
| Eu31500   | [X]Bipolar affect dis cur epi severe depres with psyc symp   | 1                 |
| Eu31600   | [X]Bipolar affective disorder, current episode mixed         | 1                 |
| Eu31y00   | [X]Other bipolar affective disorders                         | 1                 |
| Eu31y11   | [X]Bipolar II disorder                                       | 1                 |
| Eu31z00   | [X]Bipolar affective disorder, unspecified                   | 1                 |

| Read code | Description                                                  | Number of studies |
|-----------|--------------------------------------------------------------|-------------------|
| Eu33312   | [X]Manic-depress psychosis,depressed type+psychotic symptoms | 1                 |
| Eu34.00   | [X]Persistent mood affective disorders                       | 1                 |
| Eu3y.00   | [X]Other mood affective disorders                            | 1                 |
| Eu3y000   | [X]Other single mood affective disorders                     | 1                 |
| Eu3y011   | [X]Mixed affective episode                                   | 1                 |
| Eu3yy00   | [X]Other specified mood affective disorders                  | 1                 |
| Eu4..00   | [X]Neurotic, stress - related and somoform disorders         | 1                 |
| Eu43.00   | [X]Reaction to severe stress, and adjustment disorders       | 1                 |
| Eu43000   | [X]Acute stress reaction                                     | 1                 |
| Eu43012   | [X]Acute reaction to stress                                  | 1                 |
| Eu43y00   | [X]Other reactions to severe stress                          | 1                 |
| Eu43z00   | [X]Reaction to severe stress, unspecified                    | 1                 |
| Eu92.11   | [X]Emotional behavioural problems                            | 1                 |
| R007z14   | [D]Work stress                                               | 1                 |
| ZR2A.00   | Beck depression inventory                                    | 1                 |
| ZR2A.11   | BDI - Beck depression inventory                              | 1                 |
| ZR2B.00   | Beck hopelessness scale                                      | 1                 |
| ZR2G.00   | Behaviour and mood disturbance scale                         | 1                 |
| ZR2h.00   | Brief depression rating scale                                | 1                 |
| ZR7..00   | Depression anxiety scale                                     | 1                 |
| ZR8..00   | Depression self rating scale                                 | 1                 |
| ZR8..11   | DSRS - Depression self rating scale                          | 1                 |
| ZRBY.00   | Edinburgh postnatal depression scale                         | 1                 |
| ZRBY.11   | EPDS - Edinburgh postnatal depression scale                  | 1                 |
| ZRL6.00   | Geriatric depression scale                                   | 1                 |
| ZRL6.11   | GDS - Geriatric depression scale                             | 1                 |
| ZRL6.12   | Geriatric depression score                                   | 1                 |
| ZRLU.00   | Hamilton rating scale for depression                         | 1                 |
| ZRLU.11   | HAMD - Hamilton rating scale for depression                  | 1                 |
| ZRLU.12   | HRSD - Hamilton rating scale for depression                  | 1                 |
| ZRLfH00   | Health of the Nation Outcome Scale item 7 - depressed mood   | 1                 |
| ZRLfI00   | Health of the Nation Outcome Scale item 7 - depressed mood   | 1                 |
| ZRLn.00   | Hopelessness scale                                           | 1                 |
| ZRLr.00   | Hospital anxiety and depression scale                        | 1                 |
| ZRLr.11   | HAD - Hospital anxiety and depression scale                  | 1                 |
| ZRLr.12   | HADS - Hospital anxiety and depression scale                 | 1                 |
| ZRVM.00   | Leeds scale for the self-assessment of anxiety & depression  | 1                 |
| ZRaH.00   | Mood affective checklist                                     | 1                 |
| ZRaH.11   | MACL - Mood affective checklist                              | 1                 |
| ZRbS.00   | Positive and negative affect schedule                        | 1                 |
| ZRby.00   | Profile of mood states                                       | 1                 |
| ZRby.11   | POMS - Profile of mood states                                | 1                 |
| ZRrl.00   | Wakefield self-assessment depression inventory               | 1                 |
| ZRrY.00   | WHO depression scale                                         | 1                 |
| ZRrc.00   | Zung self-rating depression scale                            | 1                 |
| ZRrc.11   | SDS - Zung self-rating depression scale                      | 1                 |
| ZV11100   | [V]Personal history of affective disorder                    | 1                 |
| ZV11111   | [V]Personal history of manic-depressive psychosis            | 1                 |
| ZV11112   | [V]Personal history of manic-depressive psychosis            | 1                 |



**Table 4. ICD codes used in the studies of depression.**

| <b>Study</b>        | <b>Databases</b> | <b>ICD version</b> | <b>List of codes</b>   |
|---------------------|------------------|--------------------|------------------------|
| Bouras, 2016        | CPRD + HES       | ICD-10             | F32, F33               |
| Jenkins-Jones, 2018 | CPRD + HES       | ICD-10             | F32, F33, F41.2, F92.0 |

CPRD – Clinical Practice Research Datalink; HES – Hospital Episode Statistics; ICD - International Classification of Diseases.

**Table 5. List of Read codes used in the studies of composite outcomes of anxiety and depression.**

| <b>Read code</b> | <b>Description</b>                                           | <b>Number of studies</b> |
|------------------|--------------------------------------------------------------|--------------------------|
| Eu32200          | [X]Severe depressive episode without psychotic symptoms      | 2                        |
| Eu33z00          | [X]Recurrent depressive disorder, unspecified                | 2                        |
| Eu33400          | [X]Recurrent depressive disorder, currently in remission     | 2                        |
| Eu33100          | [X]Recurrent depressive disorder, current episode moderate   | 2                        |
| Eu33000          | [X]Recurrent depressive disorder, current episode mild       | 2                        |
| Eu33.00          | [X]Recurrent depressive disorder                             | 2                        |
| Eu33200          | [X]Recurr depress disorder cur epi severe without psyc sympt | 2                        |
| Eu41000          | [X]Panic disorder [episodic paroxysmal anxiety]              | 2                        |
| Eu41y00          | [X]Other specified anxiety disorders                         | 2                        |
| Eu33y00          | [X]Other recurrent depressive disorders                      | 2                        |
| Eu32y00          | [X]Other depressive episodes                                 | 2                        |
| Eu41.00          | [X]Other anxiety disorders                                   | 2                        |
| Eu32100          | [X]Moderate depressive episode                               | 2                        |
| Eu41200          | [X]Mixed anxiety and depressive disorder                     | 2                        |
| Eu32000          | [X]Mild depressive episode                                   | 2                        |
| Eu32400          | [X]Mild depression                                           | 2                        |
| Eu41100          | [X]Generalized anxiety disorder                              | 2                        |
| Eu34100          | [X]Dysthymia                                                 | 2                        |
| Eu32z00          | [X]Depressive episode, unspecified                           | 2                        |
| Eu32.00          | [X]Depressive episode                                        | 2                        |
| Eu41z00          | [X]Anxiety disorder, unspecified                             | 2                        |
| 1B1U.00          | Symptoms of depression                                       | 2                        |
| E112000          | Single major depressive episode, unspecified                 | 2                        |
| E112300          | Single major depressive episode, severe, without psychosis   | 2                        |
| E112500          | Single major depressive episode, partial or unspec remission | 2                        |
| E112200          | Single major depressive episode, moderate                    | 2                        |
| E112100          | Single major depressive episode, mild                        | 2                        |
| E112600          | Single major depressive episode, in full remission           | 2                        |
| E112z00          | Single major depressive episode NOS                          | 2                        |
| E112.00          | Single major depressive episode                              | 2                        |
| E118.00          | Seasonal affective disorder                                  | 2                        |
| E113500          | Recurrent major depressive episodes,partial/unspec remission | 2                        |
| E113000          | Recurrent major depressive episodes, unspecified             | 2                        |
| E113300          | Recurrent major depressive episodes, severe, no psychosis    | 2                        |
| E113200          | Recurrent major depressive episodes, moderate                | 2                        |
| E113100          | Recurrent major depressive episodes, mild                    | 2                        |
| E113600          | Recurrent major depressive episodes, in full remission       | 2                        |
| E113z00          | Recurrent major depressive episode NOS                       | 2                        |
| E113.00          | Recurrent major depressive episode                           | 2                        |
| E113700          | Recurrent depression                                         | 2                        |
| E200500          | Recurrent anxiety                                            | 2                        |
| E291.00          | Prolonged depressive reaction                                | 2                        |
| E2B0.00          | Postviral depression                                         | 2                        |
| E200100          | Panic disorder                                               | 2                        |
| 2257.00          | O/E - depressed                                              | 2                        |
| E204.00          | Neurotic depression reactive type                            | 2                        |

| Read code | Description                                                  | Number of studies |
|-----------|--------------------------------------------------------------|-------------------|
| E200200   | Generalised anxiety disorder                                 | 2                 |
| E2B..00   | Depressive disorder NEC                                      | 2                 |
| 1BT..00   | Depressed mood                                               | 2                 |
| 1B17.00   | Depressed                                                    | 2                 |
| E2B1.00   | Chronic depression                                           | 2                 |
| E200400   | Chronic anxiety                                              | 2                 |
| E200300   | Anxiety with depression                                      | 2                 |
| E200.00   | Anxiety states                                               | 2                 |
| E200000   | Anxiety state unspecified                                    | 2                 |
| E200z00   | Anxiety state NOS                                            | 2                 |
| E135.00   | Agitated depression                                          | 2                 |
| Eu33214   | [X]Vital depression, recurrent without psychotic symptoms    | 1                 |
| Eu3z.00   | [X]Unspecified mood affective disorder                       | 1                 |
| Eu40100   | [X]Social phobias                                            | 1                 |
| Eu40112   | [X]Social neurosis                                           | 1                 |
| Eu32213   | [X]Single episode vital depression w/out psychotic symptoms  | 1                 |
| Eu32314   | [X]Single episode of reactive depressive psychosis           | 1                 |
| Eu32.13   | [X]Single episode of reactive depression                     | 1                 |
| Eu32313   | [X]Single episode of psychotic depression                    | 1                 |
| Eu32312   | [X]Single episode of psychogenic depressive psychosis        | 1                 |
| Eu32.12   | [X]Single episode of psychogenic depression                  | 1                 |
| Eu32y12   | [X]Single episode of masked depression NOS                   | 1                 |
| Eu32311   | [X]Single episode of major depression and psychotic symptoms | 1                 |
| Eu32.11   | [X]Single episode of depressive reaction                     | 1                 |
| Eu32212   | [X]Single episode major depression w/out psychotic symptoms  | 1                 |
| Eu32211   | [X]Single episode agitated depressn w/out psychotic symptoms | 1                 |
| Eu32300   | [X]Severe depressive episode with psychotic symptoms         | 1                 |
| Eu33.14   | [X]Seasonal depressive disorder                              | 1                 |
| Eu33.15   | [X]SAD - Seasonal affective disorder                         | 1                 |
| Eu06y11   | [X]Right hemispheric organic affective disorder              | 1                 |
| Eu33316   | [X]Recurrent severe episodes/reactive depressive psychosis   | 1                 |
| Eu33315   | [X]Recurrent severe episodes of psychotic depression         | 1                 |
| Eu33.13   | [X]Recurrent episodes of reactive depression                 | 1                 |
| Eu33.12   | [X]Recurrent episodes of psychogenic depression              | 1                 |
| Eu33.11   | [X]Recurrent episodes of depressive reaction                 | 1                 |
| Eu33300   | [X]Recurrent depress disorder cur epi severe with psyc symp  | 1                 |
| Eu3y111   | [X]Recurrent brief depressive episodes                       | 1                 |
| Eu33314   | [X]Recurr severe episodes/psychogenic depressive psychosis   | 1                 |
| Eu33313   | [X]Recurr severe episodes/major depression+psychotic symptom | 1                 |
| Eu43z00   | [X]Reaction to severe stress, unspecified                    | 1                 |
| Eu43.00   | [X]Reaction to severe stress, and adjustment disorders       | 1                 |
| Eu32z13   | [X]Prolonged single episode of reactive depression           | 1                 |
| Eu42100   | [X]Predominantly compulsive acts [obsessional rituals]       | 1                 |
| Eu20400   | [X]Post-schizophrenic depression                             | 1                 |
| Eu43100   | [X]Post - traumatic stress disorder                          | 1                 |
| Eu40.00   | [X]Phobic anxiety disorders                                  | 1                 |
| Eu34.00   | [X]Persistent mood affective disorders                       | 1                 |
| Eu34z00   | [X]Persistent mood affective disorder, unspecified           | 1                 |
| Eu34114   | [X]Persistant anxiety depression                             | 1                 |
| Eu41012   | [X]Panic state                                               | 1                 |
| Eu40012   | [X]Panic disorder with agoraphobia                           | 1                 |
| Eu41011   | [X]Panic attack                                              | 1                 |
| Eu3yy00   | [X]Other specified mood affective disorders                  | 1                 |

| Read code | Description                                                  | Number of studies |
|-----------|--------------------------------------------------------------|-------------------|
| Eu3y000   | [X]Other single mood affective disorders                     | 1                 |
| Eu3y100   | [X]Other recurrent mood affective disorders                  | 1                 |
| Eu43y00   | [X]Other reactions to severe stress                          | 1                 |
| Eu34y00   | [X]Other persistent mood affective disorders                 | 1                 |
| Eu42y00   | [X]Other obsessive-compulsive disorders                      | 1                 |
| Eu3y.00   | [X]Other mood affective disorders                            | 1                 |
| Eu41300   | [X]Other mixed anxiety disorders                             | 1                 |
| Eu31y00   | [X]Other bipolar affective disorders                         | 1                 |
| Eu05300   | [X]Organic mood [affective] disorders                        | 1                 |
| Eu05400   | [X]Organic anxiety disorder                                  | 1                 |
| Eu60513   | [X]Obsessive-compulsive personality disorder                 | 1                 |
| Eu42.12   | [X]Obsessive-compulsive neurosis                             | 1                 |
| Eu42z00   | [X]Obsessive-compulsive disorder, unspecified                | 1                 |
| Eu42.00   | [X]Obsessive - compulsive disorder                           | 1                 |
| Eu4..00   | [X]Neurotic, stress - related and somoform disorders         | 1                 |
| Eu34113   | [X]Neurotic depression                                       | 1                 |
| Eu3..00   | [X]Mood - affective disorders                                | 1                 |
| Eu33z11   | [X]Monopolar depression NOS                                  | 1                 |
| Eu3y011   | [X]Mixed affective episode                                   | 1                 |
| Eu41211   | [X]Mild anxiety depression                                   | 1                 |
| Eu31.13   | [X]Manic-depressive reaction                                 | 1                 |
| Eu31.12   | [X]Manic-depressive psychosis                                | 1                 |
| Eu31.11   | [X]Manic-depressive illness                                  | 1                 |
| Eu33312   | [X]Manic-depress psychosis,depressed type+psychotic symptoms | 1                 |
| Eu33213   | [X]Manic-depress psychosis,depressd,no psychotic symptoms    | 1                 |
| Eu32700   | [X]Major depression, severe without psychotic symptoms       | 1                 |
| Eu32800   | [X]Major depression, severe with psychotic symptoms          | 1                 |
| Eu33212   | [X]Major depression, recurrent without psychotic symptoms    | 1                 |
| Eu32600   | [X]Major depression, moderately severe                       | 1                 |
| Eu32500   | [X]Major depression, mild                                    | 1                 |
| Eu33211   | [X]Endogenous depression without psychotic symptoms          | 1                 |
| Eu33311   | [X]Endogenous depression with psychotic symptoms             | 1                 |
| Eu51511   | [X]Dream anxiety disorder                                    | 1                 |
| Eu34112   | [X]Depressive personality disorder                           | 1                 |
| Eu34111   | [X]Depressive neurosis                                       | 1                 |
| Eu32z12   | [X]Depressive disorder NOS                                   | 1                 |
| Eu92000   | [X]Depressive conduct disorder                               | 1                 |
| Eu32z11   | [X]Depression NOS                                            | 1                 |
| Eu60511   | [X]Compulsive personality disorder                           | 1                 |
| Eu63011   | [X]Compulsive gambling                                       | 1                 |
| Eu43013   | [X]Combat fatigue                                            | 1                 |
| Eu31z00   | [X]Bipolar affective disorder, unspecified                   | 1                 |
| Eu31700   | [X]Bipolar affective disorder, currently in remission        | 1                 |
| Eu31600   | [X]Bipolar affective disorder, current episode mixed         | 1                 |
| Eu31900   | [X]Bipolar affective disorder type II                        | 1                 |
| Eu31800   | [X]Bipolar affective disorder type I                         | 1                 |
| Eu31.00   | [X]Bipolar affective disorder                                | 1                 |
| Eu31300   | [X]Bipolar affect disorder cur epi mild or moderate depressn | 1                 |
| Eu31500   | [X]Bipolar affect dis cur epi severe depres with psyc symp   | 1                 |
| Eu31y11   | [X]Bipolar II disorder                                       | 1                 |
| Eu31911   | [X]Bipolar II disorder                                       | 1                 |
| Eu31400   | [X]Bipol aff disord, curr epis sev depress, no psychot symp  | 1                 |
| Eu32y11   | [X]Atypical depression                                       | 1                 |

| Read code | Description                                                  | Number of studies |
|-----------|--------------------------------------------------------------|-------------------|
| Eu41113   | [X]Anxiety state                                             | 1                 |
| Eu41112   | [X]Anxiety reaction                                          | 1                 |
| Eu41111   | [X]Anxiety neurosis                                          | 1                 |
| Eu41y11   | [X]Anxiety hysteria                                          | 1                 |
| Eu41z11   | [X]Anxiety NOS                                               | 1                 |
| Eu42.11   | [X]Anankastic neurosis                                       | 1                 |
| Eu40011   | [X]Agoraphobia without history of panic disorder             | 1                 |
| Eu40000   | [X]Agoraphobia                                               | 1                 |
| Eu3z.11   | [X]Affective psychosis NOS                                   | 1                 |
| Eu34011   | [X]Affective personality disorder                            | 1                 |
| Eu43000   | [X]Acute stress reaction                                     | 1                 |
| Eu43012   | [X]Acute reaction to stress                                  | 1                 |
| Eu32z14   | [X] Reactive depression NOS                                  | 1                 |
| ZV11112   | [V]Personal history of manic-depressive psychosis            | 1                 |
| ZV11111   | [V]Personal history of manic-depressive psychosis            | 1                 |
| ZV11100   | [V]Personal history of affective disorder                    | 1                 |
| R2y2.00   | [D]Nervousness                                               | 1                 |
| 1BK..00   | Worried                                                      | 1                 |
| E11y000   | Unspecified manic-depressive psychoses                       | 1                 |
| E117400   | Unspecified bipolar affective disorder,severe with psychosis | 1                 |
| E117000   | Unspecified bipolar affective disorder, unspecified          | 1                 |
| E117300   | Unspecified bipolar affective disorder, severe, no psychosis | 1                 |
| E117200   | Unspecified bipolar affective disorder, moderate             | 1                 |
| E117100   | Unspecified bipolar affective disorder, mild                 | 1                 |
| E117600   | Unspecified bipolar affective disorder, in full remission    | 1                 |
| E117z00   | Unspecified bipolar affective disorder, NOS                  | 1                 |
| E117.00   | Unspecified bipolar affective disorder                       | 1                 |
| E117500   | Unspecified bipolar affect disord, partial/unspec remission  | 1                 |
| E11z000   | Unspecified affective psychoses NOS                          | 1                 |
| E211000   | Unspecified affective personality disorder                   | 1                 |
| 1JJ..00   | Suspected depression                                         | 1                 |
| E284.00   | Stress reaction causing mixed disturbance of emotion/conduct | 1                 |
| 67J..00   | Stress counselling                                           | 1                 |
| E202.11   | Social phobic disorders                                      | 1                 |
| E112400   | Single major depressive episode, severe, with psychosis      | 1                 |
| E002z00   | Senile dementia with depressive or paranoid features NOS     | 1                 |
| E002.00   | Senile dementia with depressive or paranoid features         | 1                 |
| E002100   | Senile dementia with depression                              | 1                 |
| 1BT..12   | Sad mood                                                     | 1                 |
| 8HHq.00   | Referral for guided self-help for depression                 | 1                 |
| 8HHp.00   | Referral for guided self-help for anxiety                    | 1                 |
| Z4I7211   | Reducing anxiety                                             | 1                 |
| E113400   | Recurrent major depressive episodes, severe, with psychosis  | 1                 |
| Z4I7100   | Recognising anxiety                                          | 1                 |
| E11z100   | Rebound mood swings                                          | 1                 |
| E130.00   | Reactive depressive psychosis                                | 1                 |
| E130.11   | Psychotic reactive depression                                | 1                 |
| E001300   | Presenile dementia with depression                           | 1                 |
| E2A2.11   | Post-traumatic brain syndrome                                | 1                 |
| E202.00   | Phobic disorders                                             | 1                 |
| E202.12   | Phobic anxiety                                               | 1                 |
| E202000   | Phobia unspecified                                           | 1                 |
| 8CAa.00   | Patient given advice about management of depression          | 1                 |

| Read code | Description                                                  | Number of studies |
|-----------|--------------------------------------------------------------|-------------------|
| E200111   | Panic attack                                                 | 1                 |
| E29y100   | Other post-traumatic stress disorder                         | 1                 |
| E11y300   | Other mixed manic-depressive psychoses                       | 1                 |
| E11yz00   | Other and unspecified manic-depressive psychoses NOS         | 1                 |
| E11y.00   | Other and unspecified manic-depressive psychoses             | 1                 |
| E11z.00   | Other and unspecified affective psychoses                    | 1                 |
| E11zz00   | Other affective psychosis NOS                                | 1                 |
| E283.00   | Other acute stress reactions                                 | 1                 |
| E283z00   | Other acute stress reaction NOS                              | 1                 |
| E03y200   | Organic affective syndrome                                   | 1                 |
| 9kQ..00   | On full dose long term treatment depression - enh serv admin | 1                 |
| 9HA0.00   | On depression register                                       | 1                 |
| E203.00   | Obsessive-compulsive disorders                               | 1                 |
| E203z00   | Obsessive-compulsive disorder NOS                            | 1                 |
| E214100   | Obsessional personality                                      | 1                 |
| E203100   | Obsessional neurosis                                         | 1                 |
| 225J.00   | O/E - panic attack                                           | 1                 |
| 2259.00   | O/E - nervous                                                | 1                 |
| 225K.00   | O/E - fearful mood                                           | 1                 |
| 2253.00   | O/E - distressed                                             | 1                 |
| 2258.00   | O/E - anxious                                                | 1                 |
| E116000   | Mixed bipolar affective disorder, unspecified                | 1                 |
| E116300   | Mixed bipolar affective disorder, severe, without psychosis  | 1                 |
| E116400   | Mixed bipolar affective disorder, severe, with psychosis     | 1                 |
| E116500   | Mixed bipolar affective disorder, partial/unspec remission   | 1                 |
| E116200   | Mixed bipolar affective disorder, moderate                   | 1                 |
| E116100   | Mixed bipolar affective disorder, mild                       | 1                 |
| E116600   | Mixed bipolar affective disorder, in full remission          | 1                 |
| E116z00   | Mixed bipolar affective disorder, NOS                        | 1                 |
| E116.00   | Mixed bipolar affective disorder                             | 1                 |
| E11z200   | Masked depression                                            | 1                 |
| E115.11   | Manic-depressive - now depressed                             | 1                 |
| 13Y3.00   | Manic-depression association member                          | 1                 |
| 1BT..11   | Low mood                                                     | 1                 |
| 1BU..00   | Loss of hope for the future                                  | 1                 |
| 1BQ..00   | Loss of capacity for enjoyment                               | 1                 |
| 146D.00   | H/O: manic depressive disorder                               | 1                 |
| 1465.00   | H/O: depression                                              | 1                 |
| 1466.00   | H/O: anxiety state                                           | 1                 |
| 1B1H.00   | Frightened                                                   | 1                 |
| Z522600   | Flooding - obsessional compulsive disorder                   | 1                 |
| 1B1T.00   | Feeling stressed                                             | 1                 |
| 16ZB100   | Feeling low or worried                                       | 1                 |
| E202D00   | Fear of death                                                | 1                 |
| 1B1H.11   | Fear                                                         | 1                 |
| 9hC..00   | Exception reporting: depression quality indicators           | 1                 |
| 9hC0.00   | Excepted from depression quality indicators: Patient unsuita | 1                 |
| 9hC1.00   | Excepted from depression quality indicators: Informed dissen | 1                 |
| E112.13   | Endogenous depression first episode                          | 1                 |
| E112.12   | Endogenous depression first episode                          | 1                 |
| E113.11   | Endogenous depression - recurrent                            | 1                 |
| E112.14   | Endogenous depression                                        | 1                 |
| 9N54.00   | Encounter for fear                                           | 1                 |

| Read code | Description                                                  | Number of studies |
|-----------|--------------------------------------------------------------|-------------------|
| 1B1U.11   | Depressive symptoms                                          | 1                 |
| E11..12   | Depressive psychoses                                         | 1                 |
| E211200   | Depressive personality disorder                              | 1                 |
| 9Ov3.00   | Depression monitoring verbal invite                          | 1                 |
| 9Ov2.00   | Depression monitoring third letter                           | 1                 |
| 9Ov4.00   | Depression monitoring telephone invite                       | 1                 |
| 9Ov1.00   | Depression monitoring second letter                          | 1                 |
| 9Ov0.00   | Depression monitoring first letter                           | 1                 |
| 9Ov..00   | Depression monitoring administration                         | 1                 |
| 9H91.00   | Depression medication review                                 | 1                 |
| 8BK0.00   | Depression management programme                              | 1                 |
| 9H92.00   | Depression interim review                                    | 1                 |
| 9H90.00   | Depression annual review                                     | 1                 |
| 9k4..00   | Depression - enhanced services administration                | 1                 |
| 9k40.00   | Depression - enhanced service completed                      | 1                 |
| E214.00   | Compulsive personality disorders                             | 1                 |
| E214z00   | Compulsive personality disorder NOS                          | 1                 |
| E203000   | Compulsive neurosis                                          | 1                 |
| 1P3..00   | Compulsive behaviour                                         | 1                 |
| E28..11   | Combat fatigue                                               | 1                 |
| 1B1V.00   | C/O - panic attack                                           | 1                 |
| 1B17.11   | C/O - feeling depressed                                      | 1                 |
| E290z00   | Brief depressive reaction NOS                                | 1                 |
| E290.00   | Brief depressive reaction                                    | 1                 |
| E11..11   | Bipolar psychoses                                            | 1                 |
| E115600   | Bipolar affective disorder, now depressed, in full remission | 1                 |
| E115000   | Bipolar affective disorder, currently depressed, unspecified | 1                 |
| E115200   | Bipolar affective disorder, currently depressed, moderate    | 1                 |
| E115100   | Bipolar affective disorder, currently depressed, mild        | 1                 |
| E115z00   | Bipolar affective disorder, currently depressed, NOS         | 1                 |
| E115.00   | Bipolar affective disorder, currently depressed              | 1                 |
| E115300   | Bipolar affect disord, now depressed, severe, no psychosis   | 1                 |
| E115400   | Bipolar affect disord, now depressed, severe with psychosis  | 1                 |
| E115500   | Bipolar affect disord, now depressed, part/unspec remission  | 1                 |
| E11y200   | Atypical depressive disorder                                 | 1                 |
| E004300   | Arteriosclerotic dementia with depression                    | 1                 |
| 1B1H.12   | Apprehension                                                 | 1                 |
| 1B13.00   | Anxiousness                                                  | 1                 |
| 8G94.00   | Anxiety management training                                  | 1                 |
| Z4L1.00   | Anxiety counselling                                          | 1                 |
| 173f.00   | Anxiety about breathlessness                                 | 1                 |
| 6659000   | Antidepressant drug treatment started                        | 1                 |
| E214000   | Anankastic personality                                       | 1                 |
| E203.11   | Anancastic neurosis                                          | 1                 |
| Z4I7200   | Alleviating anxiety                                          | 1                 |
| E202200   | Agoraphobia without mention of panic attacks                 | 1                 |
| E202100   | Agoraphobia with panic attacks                               | 1                 |
| E112.11   | Agitated depression                                          | 1                 |
| E11..00   | Affective psychoses                                          | 1                 |
| E211.00   | Affective personality disorder                               | 1                 |
| E292400   | Adjustment reaction with anxious mood                        | 1                 |
| E282.00   | Acute stupor state due to acute stress reaction              | 1                 |
| E28z.00   | Acute stress reaction NOS                                    | 1                 |

| <b>Read code</b> | <b>Description</b>                             | <b>Number of studies</b> |
|------------------|------------------------------------------------|--------------------------|
| E28..00          | Acute reaction to stress                       | 1                        |
| E283100          | Acute posttrauma stress state                  | 1                        |
| E280.00          | Acute panic state due to acute stress reaction | 1                        |
| E281.00          | Acute fugue state due to acute stress reaction | 1                        |
| Z4I7.00          | Acknowledging anxiety                          | 1                        |
| 1B12.00          | 'Nerves' - nervousness                         | 1                        |
| 9kQ..11          |                                                | 1                        |



**Table 6. List of Read codes used in the studies of cognitive impairment.**

| <b>Read code</b> | <b>Description</b>                                           | <b>Number of studies</b> |
|------------------|--------------------------------------------------------------|--------------------------|
| Eu01.00          | [X]Vascular dementia                                         | 13                       |
| Eu01200          | [X]Subcortical vascular dementia                             | 13                       |
| Eu00112          | [X]Senile dementia,Alzheimer's type                          | 13                       |
| Eu00011          | [X]Presenile dementia,Alzheimer's type                       | 13                       |
| Eu01100          | [X]Multi-infarct dementia                                    | 13                       |
| Eu00.00          | [X]Dementia in Alzheimer's disease                           | 13                       |
| Eu01.11          | [X]Arteriosclerotic dementia                                 | 13                       |
| Eu00z11          | [X]Alzheimer's dementia unspec                               | 13                       |
| E000.00          | Uncomplicated senile dementia                                | 13                       |
| E004.11          | Multi infarct dementia                                       | 13                       |
| E004.00          | Arteriosclerotic dementia                                    | 13                       |
| F110000          | Alzheimer's disease with early onset                         | 13                       |
| F110.00          | Alzheimer's disease                                          | 13                       |
| Eu01z00          | [X]Vascular dementia, unspecified                            | 12                       |
| Eu01000          | [X]Vascular dementia of acute onset                          | 12                       |
| Eu00012          | [X]Primary degen dementia, Alzheimer's type, presenile onset | 12                       |
| Eu00113          | [X]Primary degen dementia of Alzheimer's type, senile onset  | 12                       |
| Eu01111          | [X]Predominantly cortical dementia                           | 12                       |
| Eu00z00          | [X]Dementia in Alzheimer's disease, unspecified              | 12                       |
| Eu00100          | [X]Dementia in Alzheimer's disease with late onset           | 12                       |
| Eu00000          | [X]Dementia in Alzheimer's disease with early onset          | 12                       |
| Eu00200          | [X]Dementia in Alzheimer's dis, atypical or mixed type       | 12                       |
| Eu00013          | [X]Alzheimer's disease type 2                                | 12                       |
| Eu00111          | [X]Alzheimer's disease type 1                                | 12                       |
| E004000          | Uncomplicated arteriosclerotic dementia                      | 12                       |
| E004200          | Arteriosclerotic dementia with paranoia                      | 12                       |
| E004300          | Arteriosclerotic dementia with depression                    | 12                       |
| E004100          | Arteriosclerotic dementia with delirium                      | 12                       |
| E004z00          | Arteriosclerotic dementia NOS                                | 12                       |
| F110100          | Alzheimer's disease with late onset                          | 12                       |
| Eu01y00          | [X]Other vascular dementia                                   | 11                       |
| Eu01300          | [X]Mixed cortical and subcortical vascular dementia          | 11                       |
| Eu02.00          | [X]Dementia in other diseases classified elsewhere           | 11                       |
| Eu02300          | [X]Dementia in Parkinson's disease                           | 11                       |
| Eu02z00          | [X] Unspecified dementia                                     | 11                       |
| Eu02z14          | [X] Senile dementia NOS                                      | 11                       |
| E00..12          | Senile/presenile dementia                                    | 11                       |
| E002000          | Senile dementia with paranoia                                | 11                       |
| E002100          | Senile dementia with depression                              | 11                       |
| E001.00          | Presenile dementia                                           | 11                       |
| E041.00          | Dementia in conditions EC                                    | 11                       |
| Fyu3000          | [X]Other Alzheimer's disease                                 | 10                       |
| Eu02500          | [X]Lewy body dementia                                        | 10                       |
| Eu02y00          | [X]Dementia in other specified diseases classif elsewhere    | 10                       |
| Eu04100          | [X]Delirium superimposed on dementia                         | 10                       |
| Eu02z16          | [X] Senile dementia, depressed or paranoid type              | 10                       |
| Eu02z13          | [X] Primary degenerative dementia NOS                        | 10                       |
| Eu02z11          | [X] Presenile dementia NOS                                   | 10                       |
| E001000          | Uncomplicated presenile dementia                             | 10                       |
| E002z00          | Senile dementia with depressive or paranoid features NOS     | 10                       |
| E002.00          | Senile dementia with depressive or paranoid features         | 10                       |

| Read code | Description                                        | Number of studies |
|-----------|----------------------------------------------------|-------------------|
| E003.00   | Senile dementia with delirium                      | 10                |
| E00..11   | Senile dementia                                    | 10                |
| E001200   | Presenile dementia with paranoia                   | 10                |
| E001300   | Presenile dementia with depression                 | 10                |
| E001100   | Presenile dementia with delirium                   | 10                |
| E001z00   | Presenile dementia NOS                             | 10                |
| Eu02000   | [X]Dementia in Pick's disease                      | 9                 |
| Eu02200   | [X]Dementia in Huntington's disease                | 9                 |
| Eu02400   | [X]Dementia in human immunodef virus [HIV] disease | 8                 |
| Eu02100   | [X]Dementia in Creutzfeldt-Jakob disease           | 8                 |
| F112.00   | Senile degeneration of brain                       | 8                 |
| F116.00   | Lewy body disease                                  | 8                 |
| F111.00   | Pick's disease                                     | 7                 |
| E012.00   | Other alcoholic dementia                           | 6                 |
| E012.11   | Alcoholic dementia NOS                             | 6                 |
| Eu10711   | [X]Alcoholic dementia NOS                          | 5                 |
| E00z.00   | Senile or presenile psychoses NOS                  | 5                 |
| 6AB..00   | Dementia annual review                             | 5                 |
| Eu02z15   | [X] Senile psychosis NOS                           | 4                 |
| Eu02z12   | [X] Presenile psychosis NOS                        | 4                 |
| ZS7C500   | Language disorder of dementia                      | 4                 |
| E02y100   | Drug-induced dementia                              | 4                 |
| 66h..00   | Dementia monitoring                                | 4                 |
| R00z011   | [D]Memory deficit                                  | 3                 |
| e000.00   | Uncomplicated senile dementia                      | 3                 |
| Z7CEG00   | Transient memory loss                              | 3                 |
| Z7CF811   | Short-term memory loss                             | 3                 |
| E00..00   | Senile and presenile organic psychotic conditions  | 3                 |
| 2900      | SENILE DEMENTIA                                    | 3                 |
| Z7CF800   | Poor short-term memory                             | 3                 |
| Z7CEH15   | Poor memory                                        | 3                 |
| 2901A     | PRESENILE DEMENTIA                                 | 3                 |
| E00y.00   | Other senile and presenile organic psychoses       | 3                 |
| 3A30.00   | Memory: present place not knwn                     | 3                 |
| Z7CEH14   | Memory problem                                     | 3                 |
| 1B1A.12   | Memory loss symptom                                | 3                 |
| 1B1A.00   | Memory loss - amnesia                              | 3                 |
| Z7CE611   | Memory loss                                        | 3                 |
| Z7CEJ00   | Memory lapses                                      | 3                 |
| Z7CEH00   | Memory impairment                                  | 3                 |
| 1B1A.13   | Memory disturbance                                 | 3                 |
| Z7CEC11   | Loss of memory for recent events                   | 3                 |
| Z7CE615   | Loss of memory                                     | 3                 |
| 1461.00   | H/O: dementia                                      | 3                 |
| 3AE6.00   | GDS level 7 - very severe cognitive decline        | 3                 |
| 3AE5.00   | GDS level 6 - severe cognitive decline             | 3                 |
| 3AE4.00   | GDS level 5 - moderately severe cognitive decline  | 3                 |
| 3AE3.00   | GDS level 4 - moderate cognitive decline           | 3                 |
| 3AE2.00   | GDS level 3 - mild cognitive decline               | 3                 |
| 3AE1.00   | GDS level 2 - very mild cognitive decline          | 3                 |
| 2930      | DEMENTIA ARTERIOSCLEROTIC                          | 3                 |
| 299 G     | DEMENTIA AGGRESSIVE                                | 3                 |
| 299 B     | DEMENTIA                                           | 3                 |

| Read code | Description                                 | Number of studies |
|-----------|---------------------------------------------|-------------------|
| E012000   | Chronic alcoholic brain syndrome            | 3                 |
| 1B1A.11   | Amnesia symptom                             | 3                 |
| ZR1K.00   | Alzheimer's disease assessment scale        | 3                 |
| 2901B     | ALZHEIMER'S DISEASE                         | 3                 |
| ZR1K.11   | ADAS - Alzheimer's disease assessment scale | 3                 |
| Eu80200   | [X]Receptive language disorder              | 2                 |
| R00z000   | [D]Amnesia (retrograde)                     | 2                 |
| ZS78D00   | Wernicke's dysphasia                        | 2                 |
| ZS78D13   | Wernicke's aphasia                          | 2                 |
| Z7C3500   | Unable to use verbal reasoning              | 2                 |
| Z7C3200   | Unable to reason                            | 2                 |
| Z7C5100   | Unable to concentrate                       | 2                 |
| 1B1A000   | Temporary loss of memory                    | 2                 |
| Z7CEF00   | Temporary loss of memory                    | 2                 |
| Z7C5313   | Short concentration span                    | 2                 |
| Z7C5312   | Short attention span                        | 2                 |
| 1BR0.11   | Short attention span                        | 2                 |
| 8HTY.00   | Referral to memory clinic                   | 2                 |
| 8H1a.00   | Referral to dementia care advisor           | 2                 |
| Z7C5300   | Reduced concentration span                  | 2                 |
| 1BR..00   | Reduced concentration                       | 2                 |
| Z7C5311   | Reduced attention span                      | 2                 |
| E00y.11   | Presbyophrenic psychosis                    | 2                 |
| Z7CEB12   | Poor memory for remote events               | 2                 |
| Z7CFO00   | Poor long-term memory                       | 2                 |
| 1BW..00   | Poor concentration                          | 2                 |
| Z7CEC12   | No memory for recent events                 | 2                 |
| Z7CEK00   | Minor memory lapses                         | 2                 |
| Z7CEL00   | Mild memory disturbance                     | 2                 |
| E2A1000   | Mild memory disturbance                     | 2                 |
| 3A40.00   | Memory: present year not known              | 2                 |
| 3A20.00   | Memory: present time not known              | 2                 |
| 3A10.00   | Memory: own age not known                   | 2                 |
| 3A50.00   | Memory: own DOB not known                   | 2                 |
| 3A70.00   | Memory: important event not kn              | 2                 |
| 3A80.00   | Memory: import.person not knwn              | 2                 |
| 3A91.00   | Memory: count down unsuccess.               | 2                 |
| 3AA1.00   | Memory: address recall unsucc.              | 2                 |
| Z7A1500   | Memory retraining                           | 2                 |
| Z7CE412   | Memory loss symptom                         | 2                 |
| Z7CE614   | Memory loss - amnesia                       | 2                 |
| Z7CE413   | Memory loss - amnesia                       | 2                 |
| Z7CE612   | Memory gone                                 | 2                 |
| Z7CEH11   | Memory dysfunction                          | 2                 |
| Z7CE400   | Memory disturbance (& amnesia (& symptom))  | 2                 |
| Z7CE414   | Memory disturbance                          | 2                 |
| Z7CEH12   | Memory deficit                              | 2                 |
| Z7CFx00   | Memory aided by use of labels               | 2                 |
| Z7CE415   | Loss of memory                              | 2                 |
| Z7CFO11   | Long-term memory loss                       | 2                 |
| Z7C5111   | Lack of concentration                       | 2                 |
| Z7CE616   | LOM - Loss of memory                        | 2                 |
| 2901D     | JACOB- CREUZFELDT DISEASE WITH DEMENTIA     | 2                 |

| Read code | Description                                                  | Number of studies |
|-----------|--------------------------------------------------------------|-------------------|
| Z7CEN11   | Invents experiences to compensate for loss of memory         | 2                 |
| Z7CEA11   | Impairment of working memory                                 | 2                 |
| Z7CEA13   | Impairment of primary memory                                 | 2                 |
| Z7C1.00   | Impaired cognition                                           | 2                 |
| 129B.00   | FH: Alzheimer's disease                                      | 2                 |
| Z7A1A00   | Executive functions training                                 | 2                 |
| 9hD0.00   | Excepted from dementia quality indicators: Patient unsuitabl | 2                 |
| 9hD1.00   | Excepted from dementia quality indicators: Informed dissent  | 2                 |
| 1S21.00   | Disturbance of memory for order of events                    | 2                 |
| Z7C3C00   | Difficulty using visuospatial reasoning                      | 2                 |
| Z7C3600   | Difficulty using verbal reasoning                            | 2                 |
| Z7C3300   | Difficulty reasoning                                         | 2                 |
| Z7C4A00   | Difficulty processing information at normal speed            | 2                 |
| Z7C4700   | Difficulty processing information accurately                 | 2                 |
| Z7C4300   | Difficulty processing information                            | 2                 |
| Z7CI100   | Difficulty making plans                                      | 2                 |
| ZR3V.13   | Dementia rating scale                                        | 2                 |
| 9Ou4.00   | Dementia monitoring verbal invite                            | 2                 |
| 9Ou3.00   | Dementia monitoring third letter                             | 2                 |
| 9Ou5.00   | Dementia monitoring telephone invite                         | 2                 |
| 9Ou2.00   | Dementia monitoring second letter                            | 2                 |
| 9Ou1.00   | Dementia monitoring first letter                             | 2                 |
| 3A...12   | Dementia assessment                                          | 2                 |
| Z7CGP00   | Delayed verbal memory                                        | 2                 |
| ZR3V.11   | DRS - Clinical dementia rating scale                         | 2                 |
| Y0601JS   | DEMENTIA CLINIC ATTENDANCE                                   | 2                 |
| Y060 JS   | DEMENTIA CLINIC                                              | 2                 |
| 2919      | DEMENTIA ALCOHOLIC                                           | 2                 |
| Z73..00   | Cognitive intervention strategies                            | 2                 |
| 28E..00   | Cognitive decline                                            | 2                 |
| ZR3V.00   | Clinical dementia rating scale                               | 2                 |
| ZR3V.12   | CDR - Clinical dementia rating scale                         | 2                 |
| Z7CEH13   | Bad memory                                                   | 2                 |
| ZR2X.12   | BDRS - Blessed dementia rating scale                         | 2                 |
| Z7A1400   | Attention training                                           | 2                 |
| Z7CE600   | Amnesia                                                      | 2                 |
| EU02y..0  |                                                              | 2                 |
| X0034     |                                                              | 2                 |
| AE..00    |                                                              | 2                 |
| Ryu5.00   | [X]Symptoms/signs inv cognit, percept, emotion state & behav | 1                 |
| Eu80000   | [X]Specific speech articulation disorder                     | 1                 |
| Eu81500   | [X]Severe learning disability                                | 1                 |
| Eu81700   | [X]Profound learning disability                              | 1                 |
| Ryu5000   | [X]Other amnesia                                             | 1                 |
| Ryu5100   | [X]Oth & unspec symptom/sign involv cognit funct/awareness   | 1                 |
| Eu81600   | [X]Mild learning disability                                  | 1                 |
| Eu05700   | [X]Mild cognitive disorder                                   | 1                 |
| Eu81z12   | [X]Learning disorder NOS                                     | 1                 |
| Eu81z11   | [X]Learning disability NOS                                   | 1                 |
| Eu81z13   | [X]Learn acquisition disab NOS                               | 1                 |
| Eu03.11   | [X]Korsakov's psychosis, nonalcoholic                        | 1                 |
| Eu10611   | [X]Korsakov's psychosis, alcohol induced                     | 1                 |
| Eu80014   | [X]Functional speech articulation disorder                   | 1                 |

| Read code | Description                                         | Number of studies |
|-----------|-----------------------------------------------------|-------------------|
| Eu80100   | [X]Expressive language disorder                     | 1                 |
| Eu90000   | [X]Disturbance of activity and attention            | 1                 |
| Eu44000   | [X]Dissociative amnesia                             | 1                 |
| Ryu5700   | [X]Disorientation, unspecified                      | 1                 |
| Eu10712   | [X]Chronic alcoholic brain syndrome                 | 1                 |
| Eu80600   | [X]Auditory processing disorder                     | 1                 |
| Eu90011   | [X]Attention deficit hyperactivity disorder         | 1                 |
| Eu9y700   | [X]Attention deficit disorder                       | 1                 |
| ZS91.12   | [X]Attention deficit disorder                       | 1                 |
| Eu04.12   | [X]Acute / subacute confusional state, nonalcoholic | 1                 |
| ZV40000   | [V]Problems with learning                           | 1                 |
| R045100   | [D]Dysphasia                                        | 1                 |
| R00zX00   | [D]Disorientation, unspecified                      | 1                 |
| R043.00   | [D]Aphasia                                          | 1                 |
| R00z500   | [D]Anterograde amnesia                              | 1                 |
| E011200   | Wernicke-Korsakov syndrome                          | 1                 |
| C253.00   | Wernicke's encephalopathy                           | 1                 |
| C251.11   | Wernicke's encephalopathy                           | 1                 |
| Z7CMB00   | Visuospatial agnosia                                | 1                 |
| Z7A1800   | Visual processing training                          | 1                 |
| F481J00   | Visual disorientation syndrome                      | 1                 |
| F584000   | Unspecified other abnormal auditory perception      | 1                 |
| Z7CH300   | Unrealistic planning                                | 1                 |
| Z7C7200   | Unable to write                                     | 1                 |
| ZT46200   | Unable to use verbal communication                  | 1                 |
| ZT49200   | Unable to use non-verbal communication              | 1                 |
| ZT47200   | Unable to use language                              | 1                 |
| Z7CI500   | Unable to use decision-making strategies            | 1                 |
| Z7C6200   | Unable to tell the time                             | 1                 |
| ZT4f200   | Unable to responds to communication by others       | 1                 |
| Z7C2600   | Unable to recognise surroundings                    | 1                 |
| Z7C2200   | Unable to recognise sounds                          | 1                 |
| Z7C2D00   | Unable to recognise parts of own body               | 1                 |
| Z7C2L11   | Unable to recognise objects visually                | 1                 |
| Z7C2L00   | Unable to recognise objects by sight                | 1                 |
| Z7C2H00   | Unable to recognise objects                         | 1                 |
| Z7C2T00   | Unable to recognise familiar people                 | 1                 |
| Z7C2R00   | Unable to recognise faces by sight                  | 1                 |
| Z7C2P00   | Unable to recognise faces                           | 1                 |
| Z7CFC00   | Unable to recall five digit number at five minutes  | 1                 |
| Z7C8200   | Unable to read                                      | 1                 |
| Z7C4900   | Unable to process information at normal speed       | 1                 |
| Z7C4600   | Unable to process information accurately            | 1                 |
| Z7C4200   | Unable to process information                       | 1                 |
| ZM18200   | Unable to plan meals                                | 1                 |
| Z7CH200   | Unable to plan                                      | 1                 |
| ZN28200   | Unable to organise a journey                        | 1                 |
| Z7CI900   | Unable to make considered choices                   | 1                 |
| Z7C4C00   | Unable to analyse information                       | 1                 |
| 1B1S.00   | Transient global amnesia                            | 1                 |
| Z7CE700   | Transient global amnesia                            | 1                 |
| ZS78600   | Transcortical sensory dysphasia                     | 1                 |
| ZS78411   | Transcortical motor aphasia                         | 1                 |

| Read code | Description                                                 | Number of studies |
|-----------|-------------------------------------------------------------|-------------------|
| Z7CE711   | TGA - Transient global amnesia                              | 1                 |
| ZS78300   | Subcortical aphasia                                         | 1                 |
| E031.00   | Subacute confusional state                                  | 1                 |
| Z7A2200   | Strategy training for perceptual skills                     | 1                 |
| ZS5..00   | Speech and language dyspraxias                              | 1                 |
| ZS...00   | Speech and language disorder                                | 1                 |
| ZS73.00   | Specific language impairment                                | 1                 |
| ZS73.11   | Specific language disorder                                  | 1                 |
| Z7CC700   | Spatial disorientation                                      | 1                 |
| Z7CD400   | Slow learner                                                | 1                 |
| F483200   | Simultaneous visual perception without fusion               | 1                 |
| 1B1A100   | Short-term memory loss                                      | 1                 |
| 28E2.00   | Severe cognitive impairment                                 | 1                 |
| ZS78A00   | Semantic dysphasia                                          | 1                 |
| 9Nk1.00   | Seen in memory clinic                                       | 1                 |
| 9N0y.00   | Seen in learning disabilities clinic                        | 1                 |
| 342 CP    | SENILE PARKINSONISM                                         | 1                 |
| Z7CE900   | Retrograde amnesia                                          | 1                 |
| 8HHP.00   | Referral to learning disability team                        | 1                 |
| 8H4f.00   | Referral to learning disabilities psychiatrist              | 1                 |
| 1BR0.00   | Reduced concentration span                                  | 1                 |
| ZS72.00   | Receptive language impairment                               | 1                 |
| ZS78C00   | Receptive dysphasia                                         | 1                 |
| ZS78C11   | Receptive aphasia                                           | 1                 |
| Z7A1700   | Reality orientation                                         | 1                 |
| Z7A1711   | RO - Reality orientation                                    | 1                 |
| Z7CE911   | RA - Retrograde amnesia                                     | 1                 |
| ZRbf.00   | Psycholinguistic assessments of language process in aphasia | 1                 |
| ZD38300   | Promoting aphasics communication effectiveness programme    | 1                 |
| 8G96.00   | Problem solving therapy                                     | 1                 |
| ZS78F00   | Posterior dysphasia                                         | 1                 |
| 1B1Y.00   | Poor visual sequential memory                               | 1                 |
| 1B1a.00   | Poor auditory sequential memory                             | 1                 |
| F591z00   | Perceptive hearing loss NOS                                 | 1                 |
| F591.14   | Perceptive hearing loss                                     | 1                 |
| F591.13   | Perceptive deafness                                         | 1                 |
| Z7CL700   | Perception that things appear grey                          | 1                 |
| Z7CL800   | Perception that things appear flat                          | 1                 |
| Z7CLE00   | Perception of things changing size                          | 1                 |
| Z7CLH00   | Perception of things changing shape                         | 1                 |
| Z7CL911   | Perception of things changing colour                        | 1                 |
| E2F2.00   | Other specific learning difficulty                          | 1                 |
| F584z00   | Other abnormal auditory perception NOS                      | 1                 |
| F584.00   | Other abnormal auditory perception                          | 1                 |
| Z7A1600   | Orientation training                                        | 1                 |
| Z7CC312   | Orientation poor                                            | 1                 |
| Z7CC311   | Orientation confused                                        | 1                 |
| E2A1100   | Organic memory impairment                                   | 1                 |
| 918e.00   | On learning disability register                             | 1                 |
| 29J4.00   | O/E - sensory inattention                                   | 1                 |
| 2B46.11   | O/E - sensory dysphasia                                     | 1                 |
| 2B43.00   | O/E - sensory aphasia                                       | 1                 |
| 2BM3.11   | O/E - perceptive deafness                                   | 1                 |

| Read code | Description                                                 | Number of studies |
|-----------|-------------------------------------------------------------|-------------------|
| 2B45.11   | O/E - motor dysphasia                                       | 1                 |
| 2B42.00   | O/E - motor aphasia                                         | 1                 |
| 2B46.00   | O/E - dysphasia - sensory                                   | 1                 |
| 2B45.00   | O/E - dysphasia - motor                                     | 1                 |
| 2B47.00   | O/E - dysphasia - NOS                                       | 1                 |
| 2B4..12   | O/E - dysphasia                                             | 1                 |
| 2B44.00   | O/E - aphasia NOS                                           | 1                 |
| 2B4..11   | O/E - aphasia                                               | 1                 |
| ZS78I00   | Non-fluent dysphasia                                        | 1                 |
| ZS78I11   | Non-fluent aphasia                                          | 1                 |
| 28E1.00   | Moderate cognitive impairment                               | 1                 |
| ZS78200   | Mixed transcortical dysphasia                               | 1                 |
| ZS78900   | Mixed dysphasia                                             | 1                 |
| ZS78911   | Mixed aphasia                                               | 1                 |
| Z7C2700   | Mistakes people's identity                                  | 1                 |
| 28E0.00   | Mild cognitive impairment                                   | 1                 |
| 3A60.00   | Memory: present month not knwn                              | 1                 |
| 3A11.00   | Memory: own age known                                       | 1                 |
| Z7A1300   | Memory skills training                                      | 1                 |
| Z7CFz00   | Memory aided by use of lists                                | 1                 |
| Z7CFw00   | Memory aided by use of diary                                | 1                 |
| ZS34.11   | Learning disability                                         | 1                 |
| 9HB2.00   | Learning disabilities health action plan reviewed           | 1                 |
| 9HB1.00   | Learning disabilities health action plan offered            | 1                 |
| 9HB0.00   | Learning disabilities health action plan declined           | 1                 |
| 9HB4.00   | Learning disabilities health action plan completed          | 1                 |
| 9HB6.11   | Learning disabilities annual health check declined          | 1                 |
| 9HB6.00   | Learning disabilities annual health assessment declined     | 1                 |
| 9HB5.00   | Learning disabilities annual health assessment              | 1                 |
| Z7CD200   | Learning difficulties                                       | 1                 |
| ZS3..00   | Language-related cognitive disorder                         | 1                 |
| ZS7..00   | Language impairment                                         | 1                 |
| ZS7C600   | Language disorder associated with thought disorder          | 1                 |
| 13ZA.00   | Language difficulty                                         | 1                 |
| E011100   | Korsakov's alcoholic psychosis with peripheral neuritis     | 1                 |
| E011000   | Korsakov's alcoholic psychosis                              | 1                 |
| E040.11   | Korsakoff's non-alcoholic psychosis                         | 1                 |
| ZS78D12   | Jargon dysphasia                                            | 1                 |
| ZS78D11   | Jargon aphasia                                              | 1                 |
| A411.00   | Jakob-Creutzfeldt disease                                   | 1                 |
| ZS78212   | Isolation dysphasia                                         | 1                 |
| Z7CEA12   | Impairment of immediate recall                              | 1                 |
| Z7CD300   | Impaired ability to learn new material                      | 1                 |
| E201700   | Hysterical amnesia                                          | 1                 |
| Z7CL100   | Heightened visual perception                                | 1                 |
| Z7CL511   | Heightened perception of touch                              | 1                 |
| Z7CLO00   | Heightened perception of taste                              | 1                 |
| Z7CLP11   | Heightened perception of sound                              | 1                 |
| Z7CLN11   | Heightened perception of smells                             | 1                 |
| Z7CLN12   | Heightened perception of odours                             | 1                 |
| Z7CLN00   | Heightened olfactory perception                             | 1                 |
| Z7CLP00   | Heightened auditory perception                              | 1                 |
| ZRLfE00   | Health of the Nation Outcome Scale item 4 - cognitive probl | 1                 |

| <b>Read code</b> | <b>Description</b>                                           | <b>Number of studies</b> |
|------------------|--------------------------------------------------------------|--------------------------|
| Z7CF200          | Has delayed recall                                           | 1                        |
| ZS78800          | Global dysphasia                                             | 1                        |
| 3AE..00          | Global deterioration scale: assessment of prim deg dementia  | 1                        |
| ZS78811          | Global aphasia                                               | 1                        |
| Z7CE500          | Forgetful                                                    | 1                        |
| ZS78E11          | Fluent aphasia                                               | 1                        |
| 1281.00          | FH: Senile dementia                                          | 1                        |
| ZS71.00          | Expressive language impairment                               | 1                        |
| ZS84.00          | Expressive language disorder                                 | 1                        |
| ZS78G11          | Expressive aphasia                                           | 1                        |
| 9hD..00          | Exception reporting: dementia quality indicators             | 1                        |
| ZS78K00          | Efferent motor dysphasia                                     | 1                        |
| ZS78K11          | Efferent motor aphasia                                       | 1                        |
| ZS78.00          | Dysphasia                                                    | 1                        |
| ZT46400          | Does not use verbal communication                            | 1                        |
| ZT4J400          | Does not use the elements of language                        | 1                        |
| ZT49400          | Does not use non-verbal communication                        | 1                        |
| ZT4f400          | Does not respond to communication by others                  | 1                        |
| Z7C2900          | Does not recognise self                                      | 1                        |
| Z7C2A00          | Does not recognise photographs of self                       | 1                        |
| Z7CEM00          | Distortion of memory                                         | 1                        |
| Z7CC600          | Disorientation for person                                    | 1                        |
| Z7C7300          | Difficulty writing                                           | 1                        |
| ZT46500          | Difficulty using verbal communication                        | 1                        |
| ZT49500          | Difficulty using non-verbal communication                    | 1                        |
| Z7CI600          | Difficulty using decision-making strategies                  | 1                        |
| ZT4A500          | Difficulty using a non-speech system for communication       | 1                        |
| Z7CJ100          | Difficulty solving problems                                  | 1                        |
| Z7C8300          | Difficulty reading                                           | 1                        |
| ZM18500          | Difficulty planning meals                                    | 1                        |
| Z7C9300          | Difficulty performing logical sequencing                     | 1                        |
| ZN28500          | Difficulty organising a journey                              | 1                        |
| Z7CI200          | Difficulty making decisions                                  | 1                        |
| Z7CIA00          | Difficulty making considered choices                         | 1                        |
| ZT4g500          | Difficulty imitating forms of communication                  | 1                        |
| Z7C4D00          | Difficulty analysing information                             | 1                        |
| 9HB7.11          | Did not attend learning disabilities annual health check     | 1                        |
| 9HB7.00          | Did not attend learning disabilities annual health assessmnt | 1                        |
| 9Ou..00          | Dementia monitoring administration                           | 1                        |
| ZS93.11          | DAMP - Deficits in attention motor control and perception    | 1                        |
| ZS78B11          | Conduction aphasia                                           | 1                        |
| F591y00          | Combined perceptive hearing loss                             | 1                        |
| Z7A1.00          | Cognitive skills training                                    | 1                        |
| ZD15.00          | Cognitive neuropsychological language therapy                | 1                        |
| ZD38200          | Cognitive behavioural language therapy                       | 1                        |
| E2E0z00          | Child attention deficit disorder NOS                         | 1                        |
| E2E0.00          | Child attention deficit disorder                             | 1                        |
| Z7CLK00          | Changed perception of time                                   | 1                        |
| F11x700          | Cerebral degeneration due to Jakob - Creutzfeldt disease     | 1                        |
| ZS78H00          | Broca's dysphasia                                            | 1                        |
| ZS78H11          | Broca's aphasia                                              | 1                        |
| ZS76.00          | Auditory processing disorder                                 | 1                        |
| E2E0000          | Attention deficit without hyperactivity                      | 1                        |



| <b>Read code</b> | <b>Description</b>                         | <b>Number of studies</b> |
|------------------|--------------------------------------------|--------------------------|
| ZS91.00          | Attention deficit disorder                 | 1                        |
| ZS78.11          | Aphasia                                    | 1                        |
| Z7CE811          | Antegrade amnesia                          | 1                        |
| ZS78511          | Anomic aphasia                             | 1                        |
| ZS78500          | Anomia                                     | 1                        |
| Z7CEB00          | Amnesia for remote events                  | 1                        |
| Z7CEC00          | Amnesia for recent events                  | 1                        |
| Z7CEE00          | Amnesia for important personal information | 1                        |
| Z7CED00          | Amnesia for day to day facts               | 1                        |
| 13Y7.00          | Alzheimer's disease society member         | 1                        |
| ZS7C.00          | Acquired language disorder                 | 1                        |
| ZS78100          | Acquired dysphasias                        | 1                        |
| 9OIA.00          | ADHD monitoring invitation third letter    | 1                        |
| 9OI8.00          | ADHD monitoring invitation first letter    | 1                        |
| ZS91.11          | ADD - Attention deficit disorder           | 1                        |
| Z7C2N00          |                                            | 1                        |
| E0120            |                                            | 1                        |
| 6AB.00           |                                            | 1                        |
| Z7C3800          |                                            | 1                        |
| Xa25J            |                                            | 1                        |
| Z7CEB11          |                                            | 1                        |
| Z7CC800          |                                            | 1                        |
| Z7C2J00          |                                            | 1                        |
| X00Rk            |                                            | 1                        |
| Z7C3B00          |                                            | 1                        |
| Z7A1100          |                                            | 1                        |
| Z7C6300          |                                            | 1                        |
| Z7C9200          |                                            | 1                        |
| Z7C3900          |                                            | 1                        |
| Z7C2F00          |                                            | 1                        |
| Z7C2B00          |                                            | 1                        |
| Z7A1712          |                                            | 1                        |
| Z7A2100          |                                            | 1                        |
| Z7A2300          |                                            | 1                        |

**Table 7. ICD codes used in the studies of dementia.**

| <b>Study</b> | <b>Databases</b> | <b>ICD version</b> | <b>List of codes</b>                                  |
|--------------|------------------|--------------------|-------------------------------------------------------|
| Brown, 2016  | CPRD + HES       | ICD-10             | E512, F00, F01, F02, F03,<br>F10.6, F10.7, G30, G31.0 |
| Emdin, 2016  | CPRD + HES       | ICD-10             | F01                                                   |

CPRD – Clinical Practice Research Datalink; HES – Hospital Episode Statistics; ICD - International Classification of Diseases.

**Table 8. List of Read codes used in the studies of fatigue.**

| Read code | Description                                               | Number of studies |
|-----------|-----------------------------------------------------------|-------------------|
| 168..00   | Tiredness symptom                                         | 3                 |
| 168..11   | Fatigue - symptom                                         | 3                 |
| 168..12   | Lethargy - symptom                                        | 3                 |
| 1682.00   | Fatigue                                                   | 3                 |
| 1683.00   | Tired all the time                                        | 3                 |
| 1684.11   | C/O - debility - malaise                                  | 3                 |
| 168Z.00   | Tiredness symptom NOS                                     | 3                 |
| 8HkW.00   | Referral to chronic fatigue syndrome specialist team      | 3                 |
| 8HIL.00   | Referral for chronic fatigue syndrome activity management | 3                 |
| 8Q1..00   | Activity management for chronic fatigue syndrome          | 3                 |
| E205.00   | Neurasthenia - nervous debility                           | 3                 |
| E205.12   | Tired all the time                                        | 3                 |
| Eu46011   | [X]Fatigue syndrome                                       | 3                 |
| F286.00   | Chronic fatigue syndrome                                  | 3                 |
| F286.11   | CFS - Chronic fatigue syndrome                            | 3                 |
| F286.12   | Postviral fatigue syndrome                                | 3                 |
| F286.13   | PVFS - Postviral fatigue syn                              | 3                 |
| F286.14   | Post-viral fatigue syndrome                               | 3                 |
| F286.15   | Myalgic encephalomyelitis                                 | 3                 |
| F286.16   | ME - Myalgic encephalomyelitis                            | 3                 |
| F286000   | Mild chronic fatigue syndrome                             | 3                 |
| F286100   | Moderate chronic fatigue syndrome                         | 3                 |
| F286200   | Severe chronic fatigue syndrome                           | 3                 |
| R007.00   | [D]Malaise and fatigue                                    | 3                 |
| R007100   | [D]Fatigue                                                | 3                 |
| R007211   | [D]General weakness                                       | 3                 |
| R007300   | [D]Lethargy                                               | 3                 |
| R007400   | [D]Postviral (asthenic) syndrome                          | 3                 |
| R007411   | [D]Post viral debility                                    | 3                 |
| R007500   | [D]Tiredness                                              | 3                 |
| R007z00   | [D]Malaise and fatigue NOS                                | 3                 |
| 168..13   | Malaise - symptom                                         | 2                 |
| 1683.11   | C/O - 'tired all the time'                                | 2                 |
| 1684.00   | Malaise/lethargy                                          | 2                 |
| 1684.13   | C/O - postviral syndrome                                  | 2                 |
| 1688.00   | Exhaustion                                                | 2                 |
| 1B3..12   | Weakness symptoms                                         | 2                 |
| E205.11   | Nervous exhaustion                                        | 2                 |
| Eu46000   | [X]Neurasthenia                                           | 2                 |
| F03y.12   | Myalgic encephalomyelitis                                 | 2                 |
| N239.00   | Fibromyalgia                                              | 2                 |
| N248.00   | Fibromyalgia                                              | 2                 |
| R007000   | [D]Malaise                                                | 2                 |
| R007200   | [D]Asthenia NOS                                           | 2                 |
| R2y3.00   | [D]Debility, unspecified                                  | 2                 |
| 168..14   | C/O 'Muzzy head'                                          | 1                 |
| 1B32.00   | Weakness present                                          | 1                 |
| 8HkW.11   | Referral to myalgic encephalomyelitis specialist team     | 1                 |
| 8Q1..11   | Activity management for myalgic encephalopathy            | 1                 |
| A4zy300   | Encephalitis lethargica                                   | 1                 |
| Eu46y14   | [X]Psychasthenia                                          | 1                 |

| <b>Read code</b> | <b>Description</b>         | <b>Number of studies</b> |
|------------------|----------------------------|--------------------------|
| Eu46y15          | [X]Psychasthenia neurosis  | 1                        |
| R007600          | [D]Post polio exhaustion   | 1                        |
| R007z11          | [D]Lassitude               | 1                        |
| R202.00          | [D]Senile asthenia         | 1                        |
| SN44.00          | Exhaustion due to exposure | 1                        |

**Table 9. List of Read codes used in the studies of pain.**

| Read code | Description                    | Number of studies |
|-----------|--------------------------------|-------------------|
| NyuAG     | [X]Uns sof tis d,use/overu/prs | 2                 |
| NyuA      | [X]Other soft tissue disorders | 2                 |
| Nyu80     | [X]Other myositis              | 2                 |
| Nyu3      | [X]Other joint disorders       | 2                 |
| Ryu70     | [X]Other chronic pain          | 2                 |
| NyuAF     | [X]Oth spcf soft tissu disordr | 2                 |
| Nyu85     | [X]Oth spcf disorders/muscle   | 2                 |
| NyuAA     | [X]Oth sft tis diso/oth dis CE | 2                 |
| Nyu8A     | [X]Oth disordrs/muscle/dis CE  | 2                 |
| Nyu9      | [X]Disorders/synovium+tendon   | 2                 |
| Nyu8      | [X]Disorders of muscles        | 2                 |
| Nyu8B     | [X]Disorder of muscle, unspec  | 2                 |
| R01zz     | [D]Nerv/musculoskel.sympt.NOS  | 2                 |
| R01z      | [D]Nerv/musculoskel.symp.other | 2                 |
| R01       | [D]Musculoskeletal symptoms    | 2                 |
| R01z2     | [D]Musculoskeletal pain        | 2                 |
| R00z2     | [D]General aches and pains     | 2                 |
| N22z      | Synovium/tendon/bursa dis.NOS  | 2                 |
| N0950     | Stiff joint NEC-site unspecif. | 2                 |
| N0958     | Stiff joint NEC-other specif.  | 2                 |
| N240      | Rheumatism/fibrositis NOS      | 2                 |
| N2        | Rheumatism, excl.the back      | 2                 |
| N240z     | Rheumatism or fibrositis NOS   | 2                 |
| N2400     | Rheumatism NOS - shoulder      | 2                 |
| N2403     | Rheumatic pain                 | 2                 |
| N24z      | Polyalgia                      | 2                 |
| N09       | Other/unspecif.joint disorders | 2                 |
| N22yz     | Other tendon disorder NOS      | 2                 |
| N233z     | Other specif.musc.disorder NOS | 2                 |
| N06yz     | Other specif.arthropathy NOS   | 2                 |
| N06y9     | Other spec.arthr.-multipl.site | 2                 |
| N09y      | Other spec. joint disorders    | 2                 |
| N24       | Other soft tissue disorders    | 2                 |
| N3z       | Other musculoskeletal dis. NOS | 2                 |
| N247      | Other musculoskel.limb sympts. | 2                 |
| N23y      | Other muscle/ligament/fascia   | 2                 |
| N23yz     | Other musc./lig./fasc.dis.NOS  | 2                 |
| N096z     | Other joint symptoms NOS       | 2                 |
| N0968     | Other joint sympt.-other spec. | 2                 |
| N0969     | Other joint sympt.-multip.site | 2                 |
| N09yz     | Other joint disorders NOS      | 2                 |
| N09y0     | Other joint dis.-site unspec.  | 2                 |
| N09y8     | Other joint dis.-other specif. | 2                 |
| N09y9     | Other joint dis.-multiple site | 2                 |
| N2y       | Nonarticular rheumatism OS     | 2                 |
| N2z       | Nonarticular rheumatism NOS    | 2                 |
| N39       | Nonallopathic lesions, NEC     | 2                 |
| N39z      | Nonallopathic lesion NEC NOS   | 2                 |
| N2411     | Myositis unspecified           | 2                 |
| N2480     | Myofascial pain syndrome       | 2                 |
| N241      | Myalgia/myositis unspecified   | 2                 |

| Read code | Description                      | Number of studies |
|-----------|----------------------------------|-------------------|
| N241z     | Myalgia/myositis NOS             | 2                 |
| N3y       | Musculoskeletal disorders OS     | 2                 |
| Ny        | Musculoskeletal diseases OS      | 2                 |
| Nz        | Musculoskeletal diseases NOS     | 2                 |
| N2402     | Muscular rheumatism              | 2                 |
| N23z      | Muscle/ligament/fascia dis.NOS   | 2                 |
| N2410     | Muscle pain                      | 2                 |
| N0959     | Multiple joint stiffness         | 2                 |
| N0450     | Juv ankylosing spondylitis       | 2                 |
| N095z     | Joint stiffness NEC NOS          | 2                 |
| N095      | Joint stiffness NEC              | 2                 |
| N09zz     | Joint disorders NOS              | 2                 |
| N09z      | Joint disorder NOS               | 2                 |
| N09z0     | Joint disord.NOS-site unspecif   | 2                 |
| N09z8     | Joint disord.NOS-other specif.   | 2                 |
| N09z9     | Joint disord.NOS-multiple site   | 2                 |
| N096      | Joint crepitus                   | 2                 |
| N2401     | Fibrositis unspecified           | 2                 |
| N2412     | Fibromyositis NOS                | 2                 |
| N248      | Fibromyalgia                     | 2                 |
| N239      | Fibromyalgia                     | 2                 |
| N23       | Fascia disorders                 | 2                 |
| N06zB     | Chronic arthritis                | 2                 |
| N06z0     | Arthropathy NOS-site unspecif.   | 2                 |
| N06z8     | Arthropathy NOS-other specif.    | 2                 |
| N06z9     | Arthropathy NOS-multiple sites   | 2                 |
| N06zz     | Arthropathy NOS                  | 2                 |
| N0z       | Arthropathies NOS                | 2                 |
| N06z      | Arthritis                        | 2                 |
| N0949     | Arthralgia of multiple joints    | 2                 |
| N094z     | Arthralgia NOS                   | 2                 |
| N0940     | Arthralgia - site unspecified    | 2                 |
| N0948     | Arthralgia - other specified     | 2                 |
| N094      | Ache in joint                    | 2                 |
| OX7179KB  | viral myalgia /ox                | 1                 |
| 7K6T1     | release of Torticollis           | 1                 |
| N2452     | neuropathic pain                 | 1                 |
| OX7289CH  | back pain /ox                    | 1                 |
| Syu4E     | [X]Unspecif inj should/up arm    | 1                 |
| NyuB8     | [X]Unsp osteopor + pathol frac   | 1                 |
| Nyu28     | [X]Unilat second gonarthrosis    | 1                 |
| Nyu25     | [X]Unilat primary gonarthrosis   | 1                 |
| Nyu4      | [X]Systemc connctv tis disorders | 1                 |
| Nyu4C     | [X]Sys diso/connctv t/o dis CE   | 1                 |
| Nyu95     | [X]Synovitis+tenosyn/bact d CE   | 1                 |
| Nyu97     | [X]Synovial hypertrophy, NEC     | 1                 |
| Ryu3      | [X]Sym/sign inv nv/muscskel sy   | 1                 |
| Syu12     | [X]Superf inj neck part unsp     | 1                 |
| Syu84     | [X]Sprn/str oth unsp part knee   | 1                 |
| Syu46     | [X]Spr/str oth/un part shl gir   | 1                 |
| Syu36     | [X]Spr/str ot/un pt lum sp/pel   | 1                 |
| Syu18     | [X]Spr/str jt/lg ot/un pt neck   | 1                 |
| Nyu92     | [X]Spontans ruptr/oth tendons    | 1                 |

| Read code | Description                    | Number of studies |
|-----------|--------------------------------|-------------------|
| Nyu68     | [X]Spondylphy/oth diseases CE  | 1                 |
| Nyu66     | [X]Spondylpth/o inf+paras d CE | 1                 |
| Nyu69     | [X]Spondylopathy unspecified   | 1                 |
| Nyu6      | [X]Spondylopathies             | 1                 |
| Nyu5B     | [X]Spin osteochondrosis, unsp  | 1                 |
| Nyu1G     | [X]Seroposit rheum arthr, unsp | 1                 |
| Nyu10     | [X]Rheum arthrit+inv/o org/sys | 1                 |
| Nyu05     | [X]Reactv arthropathy/o dis CE | 1                 |
| Eu45y     | [X]Psychogenic torticollis     | 1                 |
| NyuE4     | [X]Postproc muscsk disord,unsp | 1                 |
| Nyu2F     | [X]Post-traum arthr oth joints | 1                 |
| NyuC9     | [X]Periostitis/oth inf dis CE  | 1                 |
| Nyu51     | [X]Other+unspecified kyphosis  | 1                 |
| Nyu64     | [X]Other spondylosis           | 1                 |
| Nyu2D     | [X]Other specified arthrosis   | 1                 |
| Nyu1B     | [X]Other specified arthritis   | 1                 |
| Nyu65     | [X]Other spcfd spondylopathies | 1                 |
| Nyu3D     | [X]Other spcfd joint disorders | 1                 |
| NyuAB     | [X]Other shoulder lesions      | 1                 |
| Nyu54     | [X]Other secondary scoliosis   | 1                 |
| Nyu50     | [X]Other secondary kyphosis    | 1                 |
| Nyu17     | [X]Other secondary gout        | 1                 |
| Nyu21     | [X]Other primary coxarthrosis  | 1                 |
| Nyu20     | [X]Other polyarthrosis         | 1                 |
| Nyu46     | [X]Other overlap syndromes     | 1                 |
| NyuB1     | [X]Other osteoporosis          | 1                 |
| NyuC      | [X]Other osteopathies          | 1                 |
| NyuC5     | [X]Other osteonecrosis         | 1                 |
| NyuC3     | [X]Other osteomyelitis         | 1                 |
| Nyu82     | [X]Other ossification/muscle   | 1                 |
| Nyu37     | [X]Other meniscus derangements | 1                 |
| Nyu52     | [X]Other lordosis              | 1                 |
| Nyu15     | [X]Other juvenile arthritis    | 1                 |
| Nyu3C     | [X]Other instability of joint  | 1                 |
| NyuA4     | [X]Other infective bursitis    | 1                 |
| Nyu53     | [X]Other idiopathic scoliosis  | 1                 |
| Nyu41     | [X]Other giant cell arteritis  | 1                 |
| Nyu56     | [X]Other fusion of spine       | 1                 |
| Nyu55     | [X]Other forms of scoliosis    | 1                 |
| NyuAE     | [X]Other enthesopathies,NEC    | 1                 |
| Nyu7      | [X]Other dorsopathies          | 1                 |
| Nyu7A     | [X]Other dorsalgia             | 1                 |
| Nyu36     | [X]Other disorders of patella  | 1                 |
| Nyu44     | [X]Other dermatomyositis       | 1                 |
| Nyu35     | [X]Other derangements/patella  | 1                 |
| NyuB6     | [X]Other cyst of bone          | 1                 |
| NyuC2     | [X]Other chronic osteomyelitis | 1                 |
| Nyu18     | [X]Other chondrocalcinosis     | 1                 |
| Nyu81     | [X]Other calcification/muscle  | 1                 |
| NyuA1     | [X]Other bursitis of knee      | 1                 |
| NyuA6     | [X]Other bursitis NEC          | 1                 |
| NyuA5     | [X]Other bursal cyst           | 1                 |
| NyuA7     | [X]Other bursa disorder        | 1                 |

| Read code | Description                    | Number of studies |
|-----------|--------------------------------|-------------------|
| NyuE3     | [X]Other biomechanical lesions | 1                 |
| NyuB4     | [X]Other adult osteomalacia    | 1                 |
| NyuC0     | [X]Other acute osteomyelitis   | 1                 |
| NyuC4     | [X]Other 2ndary osteonecrosis  | 1                 |
| Nyu47     | [X]Oth syst dis/connctv tissue | 1                 |
| Nyu91     | [X]Oth synovitis+tenosynovitis | 1                 |
| Syu40     | [X]Oth sup inj should/upp arm  | 1                 |
| Nyu62     | [X]Oth spondylosis+myelopathy  | 1                 |
| Nyu79     | [X]Oth specified dorsopathies  | 1                 |
| NyuC8     | [X]Oth spcfd disorders of bone | 1                 |
| Nyu1A     | [X]Oth spcfc arthropathies,NEC | 1                 |
| Nyu12     | [X]Oth spcf rheumatd arthritis | 1                 |
| Nyu61     | [X]Oth spcf inflam spondylpath | 1                 |
| NyuD4     | [X]Oth spcf disordrs/cartilage | 1                 |
| Nyu59     | [X]Oth spcf deform dorsopath   | 1                 |
| NyuD3     | [X]Oth spc osteochondropathies | 1                 |
| Syu3K     | [X]Oth sp inj abd/low back/pel | 1                 |
| Nyu2E     | [X]Oth secondary coxarthrosis  | 1                 |
| Nyu83     | [X]Oth ruptr/muscl(nontraumtc) | 1                 |
| Nyu58     | [X]Oth recur vertebrl subluxtn | 1                 |
| Nyu03     | [X]Oth reactive arthropathies  | 1                 |
| Nyu13     | [X]Oth psoriatic arthropathies | 1                 |
| Nyu26     | [X]Oth post-traum gonarthrosis | 1                 |
| Nyu23     | [X]Oth post-traum coxarthrosis | 1                 |
| NyuB0     | [X]Oth osteoporosis+patholog # | 1                 |
| Nyu39     | [X]Oth intrnl derangemnts/knee | 1                 |
| Nyu90     | [X]Oth infectve(teno)synovitis | 1                 |
| Nyu60     | [X]Oth infectv spondylopathies | 1                 |
| Nyu45     | [X]Oth forms/systemc sclerosis | 1                 |
| Nyu43     | [X]Oth forms/sys lup erythemat | 1                 |
| NyuA9     | [X]Oth fibroblastic disorders  | 1                 |
| Nyu22     | [X]Oth dysplastic coxarthrosis | 1                 |
| NyuB5     | [X]Oth diso/continuity of bone | 1                 |
| NyuC6     | [X]Oth diso/bone dvlpmnt+grwth | 1                 |
| NyuE      | [X]Oth dis musculusk+connect   | 1                 |
| Nyu70     | [X]Oth cervicl disc displacmnt | 1                 |
| Nyu71     | [X]Oth cervicl disc degeneratn | 1                 |
| Nyu72     | [X]Oth cervical disc disorders | 1                 |
| Nyu3A     | [X]Oth articlur cartilag disor | 1                 |
| Nyu27     | [X]Oth 2ndry gonarthrsis,bilat | 1                 |
| Nyu24     | [X]Oth 2ndry coxarthrsis,bilat | 1                 |
| NyuB2     | [X]Osteoporosis/oth disords CE | 1                 |
| NyuBC     | [X]Osteopenia                  | 1                 |
| NyuCA     | [X]Osteopathy/other inf dis CE | 1                 |
| NyuCF     | [X]Osteopathy/oth diseases CE  | 1                 |
| NyuCC     | [X]Osteonecrosis/other dis CE  | 1                 |
| NyuCB     | [X]Osteonecros/h'moglobnpth CE | 1                 |
| NyuCD     | [X]Osteitis defrmn/neop dis CE | 1                 |
| SR1z1     | [X]Op multiple fractures unsp  | 1                 |
| Nyu00     | [X]O strep arthritis+polyarthr | 1                 |
| Nyu38     | [X]O spontn disrptn/lig(s)knee | 1                 |
| Nyu63     | [X]O spondylosis+radiculopathy | 1                 |
| NyuD2     | [X]O spf juvnl osteochondrosis | 1                 |



| Read code | Description                        | Number of studies |
|-----------|------------------------------------|-------------------|
| Nyu42     | [X]O spcf necrotiz vasculopath     | 1                 |
| Nyu3B     | [X]O spcf joint derangmnts,NEC     | 1                 |
| Nyu77     | [X]O spcf intrvrtbrl disc diso     | 1                 |
| Nyu94     | [X]O spcf diso/synovium+tendon     | 1                 |
| Nyu19     | [X]O spcf crystl arthropathies     | 1                 |
| Nyu76     | [X]O spc intrvrtbl disc degenr     | 1                 |
| Nyu75     | [X]O spc intervert disc displm     | 1                 |
| NyuB7     | [X]O spc diso/bne dnsity+struc     | 1                 |
| NyuE0     | [X]O spc acq defrm/muscskl sys     | 1                 |
| NyuA3     | [X]O sft t d rl/use,overu+prss     | 1                 |
| Nyu11     | [X]O sero+ve rheumat arthritis     | 1                 |
| Nyu57     | [X]O recur atlantoaxl subluxtn     | 1                 |
| NyuE2     | [X]O postproced muscskel disor     | 1                 |
| Nyu04     | [X]O postinf arthropath/dis CE     | 1                 |
| NyuC7     | [X]O hypertrophc osteoarthrpth     | 1                 |
| Nyu14     | [X]O enteropathic arthrpathies     | 1                 |
| NyuB3     | [X]O drug-indc osteomalac/adlt     | 1                 |
| Nyu96     | [X]O diso/synovm+tendon/dis CE     | 1                 |
| Nyu93     | [X]O contractre/tendon(sheath)     | 1                 |
| Nyu40     | [X]O cond relt/polyarterit nod     | 1                 |
| NyuC1     | [X]O chr h'matogens osteomyelit    | 1                 |
| Nyu4D     | [X]Necrotis vasculopathy, unsp     | 1                 |
| Nyu87     | [X]Myosits/protzl+paras inf CE     | 1                 |
| Nyu88     | [X]Myositis/oth infects dis CE     | 1                 |
| Nyu89     | [X]Myositis in sarcoidosis CE      | 1                 |
| Nyu86     | [X]Myositi/bacterial dis CE        | 1                 |
| Nyu84     | [X]Muscle wasting and atrophy NEC  | 1                 |
| SyuA4     | [X]Multi disloc/spr/strns,unsp     | 1                 |
| Nyu4F     | [X]Mixed connective tissue disease | 1                 |
| Nyu74     | [X]Lumb+o intvt disc d+radiclp     | 1                 |
| Nyu73     | [X]Lumb+o intrvrt disc d+mylop     | 1                 |
| Nyu5A     | [X]Lordosis, unspecified           | 1                 |
| Nyu16     | [X]Juvenile arthritis/o dis CE     | 1                 |
| Syu1      | [X]Injuries to the neck            | 1                 |
| Syu3      | [X]Injabd/low back/lum sp/pel      | 1                 |
| Syu4      | [X]Inj to shoulder/upper arm       | 1                 |
| Syu8      | [X]Inj to knee and lower leg       | 1                 |
| Nyu1      | [X]Inflammatory polyarthropathies  | 1                 |
| Nyu0      | [X]Infectious arthropathies        | 1                 |
| Nyu1C     | [X]Gt arthpth/enz d+o inh d CE     | 1                 |
| Syu16     | [X]Fracture other parts neck       | 1                 |
| Syu44     | [X]Fract should/upp arm unsp       | 1                 |
| Syu15     | [X]Fract oth spec cervic vert      | 1                 |
| SyuA2     | [X]Fract inv oth comb bod regn     | 1                 |
| NyuAH     | [X]Fibroblastic disord, unspec     | 1                 |
| NyuA8     | [X]Fasciitis,NEC                   | 1                 |
| NyuBB     | [X]Erosion of bone                 | 1                 |
| SyuA3     | [X]Dsl/spr/str,oth comb bod rg     | 1                 |
| SyuB3     | [X]Dsl/sp/st un jt/l leg,lv un     | 1                 |
| NyuB      | [X]Disordr/bone dens+structur      | 1                 |
| Nyu3E     | [X]Disorder of patella, unspec     | 1                 |
| NyuDE     | [X]Disorder cartilage, unspec      | 1                 |
| NyuBA     | [X]Disord bone dens/struc,unsp     | 1                 |

| Read code              | Description                         | Number of studies |
|------------------------|-------------------------------------|-------------------|
| Syu17                  | [X]Disloc oth unsp parts neck       | 1                 |
| SyuBC                  | [X]Disl/spr/str unsp body reg       | 1                 |
| Nyu4E                  | [X]Dermatopolymyositis, unspec      | 1                 |
| Nyu48                  | [X]Dermat(poly)myosit/neo d CE      | 1                 |
| Nyu5                   | [X]Deforming dorsopathies           | 1                 |
| Nyu1D                  | [X]Crys arthph/o meta diso,CE       | 1                 |
| Nyu67                  | [X]Collapsd vertebra in dis CE      | 1                 |
| SR1z0                  | [X]Clsd multiple fracts unspec      | 1                 |
| NyuD                   | [X]Chondropathies                   | 1                 |
| Nyu7B                  | [X]Cervical disc disord, unsp       | 1                 |
| Nyu4B                  | [X]Arthrpthy/hyprsens react CE      | 1                 |
| Nyu1F                  | [X]Arthrpth/o spcf diseases CE      | 1                 |
| Nyu1E                  | [X]Arthrpth/o en,nut+meta diso      | 1                 |
| Nyu2                   | [X]Arthrosis                        | 1                 |
| Nyu4A                  | [X]Arthropathy/o bld disord CE      | 1                 |
| Nyu49                  | [X]Arthropathy/neoplast dis CE      | 1                 |
| Nyu02                  | [X]Arthrits/o inf+paras dis CE      | 1                 |
| Nyu01                  | [X]Arthrit+polyarth/o s bact a      | 1                 |
| NyuB9                  | [X]Adult osteomalacia, unspec       | 1                 |
| Nyu                    | [X]Ad muscskl+con t dis cls tm      | 1                 |
| NyuCE                  | [X]#bone/neoplastic disease CE      | 1                 |
| NyuE1                  | [X]#/bne f insrt/o i,j pr,bn p      | 1                 |
| EMISREQ 7N945(9)       | [SO]Lumbosacral joint -Req.         | 1                 |
| HNGZ018                | [RFC] Arthritis                     | 1                 |
| R0420                  | [D]Swelling in head or neck         | 1                 |
| R042                   | [D]Swell.masslump head/neck         | 1                 |
| R027                   | [D]Spontaneous bruising             | 1                 |
| R065A                  | [D]Musculoskeletal chest pain       | 1                 |
| R137                   | [D]Musculoskel.ray/scan abnorm      | 1                 |
| R137z                  | [D]Musculosc xray/scan abn NOS      | 1                 |
| R022C                  | [D]Lump on knee                     | 1                 |
| R04zz                  | [D]Head and neck symptoms NOS       | 1                 |
| R04                    | [D]Head and neck symptoms           | 1                 |
| R04z                   | [D]Head and neck other sympt.       | 1                 |
| R00z2-1                | [D]General aches and pains          | 1                 |
| R065000                | [D]CHEST PAIN, UNSPECIFIED          | 1                 |
| R065z00                | [D]CHEST PAIN NOS                   | 1                 |
| R065.00                | [D]CHEST PAIN                       | 1                 |
| R090z00                | [D]Abdominal pain                   | 1                 |
| R090.00                | [D]Abdominal pain                   | 1                 |
| DEGRADE_EVENT_1730_49  | [DEGRADE Muscle Injury]             | 1                 |
| DEGRADE_EVENT_2469_340 | [DEGRADE Knee Pain]                 | 1                 |
| DEGRADE_EVENT_3154_40  | [DEGRADE Knee Pain]                 | 1                 |
| N135z-2                | Wry neck                            | 1                 |
| N05z3                  | Wrist osteoarthritis NOS            | 1                 |
| N0943-1                | Wrist joint pain                    | 1                 |
| N06z3-1                | Wrist arthritis NOS                 | 1                 |
| S5704                  | Whiplash injury                     | 1                 |
| EGTONWE2               | Wedge Compression # Of Dorsal Spine | 1                 |
| EGTONWE1               | Wedge Compression # Lumbar Spine    | 1                 |
| N2432                  | Weber - Christian disease           | 1                 |
| N2430                  | Weber - Christian disease           | 1                 |
| N0974                  | Walking difficulty-other spec.      | 1                 |

| Read code | Description                                | Number of studies |
|-----------|--------------------------------------------|-------------------|
| N0975     | Walking difficulty-multip.site             | 1                 |
| N0970     | Walking difficulty due to unspecified site | 1                 |
| N2413     | Viral myalgia                              | 1                 |
| N092M     | Villonodular synovitis of knee             | 1                 |
| N092z     | Villonodular synovitis NOS                 | 1                 |
| N092      | Villonodular synovitis                     | 1                 |
| N0920     | Villonod.synovitis-site unspec             | 1                 |
| N0921     | Villonod.synovitis-shoulder                | 1                 |
| N0928     | Villonod.synovitis-other spec.             | 1                 |
| N0929     | Villonod.synovitis-mult.sites              | 1                 |
| N2208     | Villonod synovitis-tend sheath             | 1                 |
| N092B     | Villonod synovitis-sternclav j             | 1                 |
| N092A     | Villonod synovitis-shoulder                | 1                 |
| N092C     | Villonod synovitis-acromclav j             | 1                 |
| N330B     | Vertebral osteoporosis                     | 1                 |
| N320      | Vertebral epiphysitis                      | 1                 |
| N1        | Vertebral column syndromes                 | 1                 |
| N1y       | Vertebral column disorders OS              | 1                 |
| N1z       | Vertebral column disorder NOS              | 1                 |
| N0966-2   | Unstable knee                              | 1                 |
| N0967-1   | Unstable ankle                             | 1                 |
| N066z     | Unspecified monoarthritis NOS              | 1                 |
| N066      | Unspecified monoarthritis                  | 1                 |
| N1290     | Unspec.disc disorder+myelop.               | 1                 |
| N0650     | Unsp.polyarthr.-site unspecif.             | 1                 |
| N065000   | Unsp.polyarthr.-site unspecif.             | 1                 |
| N0651     | Unsp.polyarthr.-shoulder                   | 1                 |
| N065800   | Unsp.polyarthr.-other specif.              | 1                 |
| N0658     | Unsp.polyarthr.-other specif.              | 1                 |
| N065900   | Unsp.polyarthr.-multiple site              | 1                 |
| N0659     | Unsp.polyarthr.-multiple site              | 1                 |
| N3020     | Unsp.osteomyelitis-site unspec             | 1                 |
| N3021     | Unsp.osteomyelitis-shoulder                | 1                 |
| N3028     | Unsp.osteomyelitis-other spec.             | 1                 |
| N3029     | Unsp.osteomyelitis-mult.site               | 1                 |
| N302z     | Unsp.osteomyelitis NOS                     | 1                 |
| N0660     | Unsp.monoarthr.-site unspecif.             | 1                 |
| N0661     | Unsp.monoarthr.-shoulder                   | 1                 |
| N0668     | Unsp.monoarthr.-other specif.              | 1                 |
| N1121     | Two lev th spondyl-no myelop               | 1                 |
| N11B1     | Two lev th spondyl + radiculop             | 1                 |
| N1131     | Two lev th spondyl + myelop                | 1                 |
| N1141     | Two lev lumbsac spond-no myelo             | 1                 |
| N1151     | Two lev lumbsac spond + myelop             | 1                 |
| N1101     | Two lev Cx spondyl-no myelop               | 1                 |
| N1191     | Two lev Cx spondyl + radiculop             | 1                 |
| N1111     | Two lev Cx spondyl + myelop                | 1                 |
| N018      | Tuberculous arthritis                      | 1                 |
| N3041     | Tuberculosis of thoracic spine             | 1                 |
| N304      | Tuberculosis of spine                      | 1                 |
| N306      | Tuberculosis of other bones                | 1                 |
| N3042     | Tuberculosis of lumbar spine               | 1                 |
| N3040     | Tuberculosis of cervical spine             | 1                 |

| Read code | Description                     | Number of studies |
|-----------|---------------------------------|-------------------|
| N3060     | Tuberculosis bone-site unspec.  | 1                 |
| N3061     | Tuberculosis bone-shoulder      | 1                 |
| N3064     | Tuberculosis bone-other sites   | 1                 |
| N3065     | Tuberculosis bone-multip.sites  | 1                 |
| N306z     | Tuberculosis bone NOS           | 1                 |
| N22yD     | Tuberc infec - tendon sheath    | 1                 |
| N2155     | Trochanteric tendinitis         | 1                 |
| N2157     | Trochanteric bursitis           | 1                 |
| N0874     | Triangular fibrocartilage tear  | 1                 |
| N0875     | Triangular fibrocartil detach   | 1                 |
| N118      | Traumatic spondylopathy         | 1                 |
| N2312     | Traumatic myositis ossificans   | 1                 |
| SE46      | Traumatic haematoma             | 1                 |
| SK        | Traumatic complicat./unsp.inj.  | 1                 |
| N061A     | Traumatic arthropathy-shoulder  | 1                 |
| N061M     | Traumatic arthropathy-knee      | 1                 |
| N061z     | Traumatic arthropathy NOS       | 1                 |
| N061      | Traumatic arthropathy           | 1                 |
| N0610     | Traumatic arthr.-site unspecif  | 1                 |
| N0611     | Traumatic arthr.-shoulder       | 1                 |
| N0618     | Traumatic arthr.-other specif.  | 1                 |
| N0619     | Traumatic arthr.-multiple site  | 1                 |
| N061B     | Traumat arthrop-sternoclav jt   | 1                 |
| N061C     | Traumat arthrop-acromioclav jt  | 1                 |
| S906      | Traumat amp at shoulder joint   | 1                 |
| SA72      | Traum.unil.amput.>knee-no comp  | 1                 |
| N220Q     | Transient synovitis             | 1                 |
| N064A     | Transient arthropathy-shoulder  | 1                 |
| N064M     | Transient arthropathy-knee      | 1                 |
| N064z     | Transient arthropathy NOS       | 1                 |
| N064      | Transient arthropathy           | 1                 |
| N064B     | Transient arthrop-sternoclav j  | 1                 |
| N0640     | Transient arthr.-site unspecif  | 1                 |
| N0641     | Transient arthr.-shoulder       | 1                 |
| N0648     | Transient arthr.-other specif.  | 1                 |
| N0649     | Transient arthr.-multiple site  | 1                 |
| N064C     | Transient arthr-acromioclav jt  | 1                 |
| N135      | Torticollis unspecified         | 1                 |
| Q20y9     | Torticollis due to birth injury | 1                 |
| 16A3      | Torticollis - symptom           | 1                 |
| N2451-1   | Toe pain                        | 1                 |
| N2162     | Tibial collateral lig.bursitis  | 1                 |
| N2450-1   | Thumb pain                      | 1                 |
| N05z4-2   | Thumb osteoarthritis NOS        | 1                 |
| N3735     | Thoracogenic scoliosis          | 1                 |
| N1485     | Thoraco-lumbar ankylosis        | 1                 |
| N144      | Thoracic/lumbosacral neuritis   | 1                 |
| N144z     | Thoracic/lumbosac.neuritis NOS  | 1                 |
| N112-1    | Thoracic spondylosis            | 1                 |
| N112      | Thoracic spond.-no myelopathy   | 1                 |
| N113      | Thoracic spond.+ myelopathy     | 1                 |
| N148B     | Thoracic spine instability      | 1                 |
| N1484     | Thoracic spine ankylosis        | 1                 |

| Read code  | Description                        | Number of studies |
|------------|------------------------------------|-------------------|
| N1401      | Thoracic spinal stenosis           | 1                 |
| N12A2      | Thoracic postlaminectomy syndr     | 1                 |
| N1440      | Thoracic nerve root pain           | 1                 |
| N12z8      | Thoracic discitis                  | 1                 |
| N121       | Thoracic disc displ.-no myelop     | 1                 |
| N1292      | Thoracic disc disord.+myelop.      | 1                 |
| N126       | Thoracic disc degeneration         | 1                 |
| S571       | Thoracic back sprain               | 1                 |
| EMISNQTH14 | Thoracic back pain                 | 1                 |
| N245-8     | Thigh pain                         | 1                 |
| N11B       | Th spondyl + radiculop             | 1                 |
| N1406      | Th spin stenosis due to oth dis    | 1                 |
| N12C1      | Th disc prolapse+radiculopathy     | 1                 |
| N12B1      | Th disc prolapse + myelopathy      | 1                 |
| N2132-1    | Tennis elbow                       | 1                 |
| N2202      | Tendon sheath giant cell tumor     | 1                 |
| ASDFGTE2   | Tendon Symptoms                    | 1                 |
| N2456      | Tender heel pad                    | 1                 |
| S46B       | Tear/articlr cart/knee,currnt      | 1                 |
| S545       | Tear of ligament of knee joint     | 1                 |
| N000*      | Systemic lupus erythematosus       | 1                 |
| N000       | Systemic lupus erythematosus       | 1                 |
| N000z      | Systemic lupus erythematos.NOS     | 1                 |
| N0012      | Syst scleros induc drugs/chems     | 1                 |
| N0003      | Syst lup eryth + organ/sys inv     | 1                 |
| N2227      | Syphilitic bursitis                | 1                 |
| N2200      | Synovitis or tenosynovitis NOS     | 1                 |
| N220z-2    | Synovitis of knee                  | 1                 |
| N220z      | Synovitis of knee                  | 1                 |
| N220V      | Synovitis of knee                  | 1                 |
| N220       | Synovitis and tenosynovitis        | 1                 |
| N220T      | Synovitis NOS                      | 1                 |
| N2201      | Synovit./tenosynovitis+dis EC      | 1                 |
| N22y4      | Synovial plica                     | 1                 |
| N098       | Synovial osteochondromatosis       | 1                 |
| N2240      | Synovial cyst unspecified          | 1                 |
| N0980      | Synov osteochondromat-shoulder     | 1                 |
| N098B      | Synov osteochondromat-knee         | 1                 |
| N0981      | Synov osteochondromat st-cla j     | 1                 |
| N0982      | Synov osteochondromat ac-cla j     | 1                 |
| 1D24       | Symptom: trunk posterior           | 1                 |
| 16J4       | Swollen knee                       | 1                 |
| 16J3       | Swollen joint                      | 1                 |
| 16J7       | Swollen foot                       | 1                 |
| 1834-1     | Swollen finger                     | 1                 |
| 1JG        | Suspected inflammatory arthritis   | 1                 |
| N21z2      | Supraspinatus tendonitis           | 1                 |
| N2113      | Supraspinatus tendinitis           | 1                 |
| N230       | Suppurative myositis               | 1                 |
| SD1y4      | Supl inj bk NOS-no mj opn wnd      | 1                 |
| SD9        | Superficialinjuriesunspecif.       | 1                 |
| SD097      | SuperficialInjury:Neck             | 1                 |
| SD2y1      | Superficial injury of scapular NOS | 1                 |

| Read code | Description                       | Number of studies |
|-----------|-----------------------------------|-------------------|
| SD6y2     | Superficial injury of knee NOS    | 1                 |
| SDz       | Superficial injuries NOS          | 1                 |
| SD0       | Superficial Injury: Neck          | 1                 |
| SD2y0     | Superfic injury shoulder NOS      | 1                 |
| SD2       | Superf.inj.shoulder/upper arm     | 1                 |
| SD1z4     | Superf.back inj.NOS+infect.       | 1                 |
| N3371     | Sudek's atrophy                   | 1                 |
| N2167     | Subpatellar bursitis              | 1                 |
| N3y01     | Subluxatn complex (vertebral)     | 1                 |
| N3y02     | Sublux stenosis of neural canal   | 1                 |
| N3081     | Subacute osteomyelitis-th spin    | 1                 |
| N3082     | Subacute osteomyelitis-lu spin    | 1                 |
| N3080     | Subacute osteomyelitis-Cx spin    | 1                 |
| N309      | Subacute osteomyelitis            | 1                 |
| N308      | Subacute osteomyelitis            | 1                 |
| N2122     | Subacromial impingement           | 1                 |
| N2116     | Subacromial bursitis              | 1                 |
| S3z2      | Stress fracture                   | 1                 |
| N095B     | Stiff sternoclavic joint NEC      | 1                 |
| N095A     | Stiff shoulder NEC                | 1                 |
| 16AZ      | Stiff neck symptom NOS            | 1                 |
| 16A       | Stiff neck symptom                | 1                 |
| N135z     | Stiff neck NOS                    | 1                 |
| 16A2      | Stiff neck                        | 1                 |
| N095M     | Stiff knee NEC                    | 1                 |
| N095C     | Stiff acromioclavicular joint NEC | 1                 |
| S5y41     | Sternoclavicular sprain           | 1                 |
| N0108     | Staphylococcc arthrit/polyarthr   | 1                 |
| S5410     | Sprn,knee jt,medial collat        | 1                 |
| S5400     | Sprn,knee jt,lat collat lgmt      | 1                 |
| S520D     | Sprn triangular fibrocartilage    | 1                 |
| S520G     | Sprn shrt intrnsc lgmt non-sp     | 1                 |
| S5        | Sprains and strains               | 1                 |
| S50       | Sprained shoulder                 | 1                 |
| S54y-99   | Sprained knee NOS                 | 1                 |
| S54-99    | Sprained knee                     | 1                 |
| S560      | Sprain, lumbosacral ligament      | 1                 |
| S564      | Sprain, iliolumbar ligament       | 1                 |
| S501      | Sprain, coraco-clav ligament      | 1                 |
| S506      | Sprain supraspinatus tendon       | 1                 |
| S505      | Sprain subscapularis tendon       | 1                 |
| S5071     | Sprain shoulder joint posterior   | 1                 |
| S5070     | Sprain shoulder joint anterior    | 1                 |
| S507      | Sprain shoulder joint             | 1                 |
| S534      | Sprain patellar tendon            | 1                 |
| S503      | Sprain infraspinatus tendon       | 1                 |
| S500      | Sprain acromio-clav ligament      | 1                 |
| S542      | Sprain -cruciate knee ligament    | 1                 |
| S541      | Sprain - medial knee ligament     | 1                 |
| S541-99   | Sprain - medial knee ligament     | 1                 |
| S540-99   | Sprain - lateral knee ligament    | 1                 |
| S540      | Sprain - lateral knee ligament    | 1                 |
| SC07      | Sprain - late effect              | 1                 |

| Read code | Description                    | Number of studies |
|-----------|--------------------------------|-------------------|
| S57X      | Spr/str ot/un pt lum sp/pel    | 1                 |
| ASDFGSP5  | Sports Injury                  | 1                 |
| N082      | Spontaneous joint dislocation  | 1                 |
| 16B3      | Spontaneous bruising           | 1                 |
| N11z0     | Spondylosis-no myelopathy,NOS  | 1                 |
| N11zz     | Spondylosis NOS                | 1                 |
| N11z1     | Spondylosis + myelopathy, NOS  | 1                 |
| N388      | Spondylolysis                  | 1                 |
| OXL7561C  | Spondylolisthesis /ox          | 1                 |
| N10z      | Spondylitis NOS                | 1                 |
| N374      | Spine curvature+other condits. | 1                 |
| N374z     | Spine curvature+other cond.NOS | 1                 |
| N1400     | Spinal stenosis unspec.region  | 1                 |
| N140z     | Spinal stenosis NOS            | 1                 |
| N140-1    | Spinal stenosis                | 1                 |
| N140      | Spinal stenosis                | 1                 |
| N101      | Spinal enthesopathy            | 1                 |
| N222z     | Specific bursitides NOS        | 1                 |
| N222      | Specific bursitides            | 1                 |
| F1382     | Spasmodic Torticollis          | 1                 |
| N23y4     | Spasm of muscle                | 1                 |
| N23yE     | Spasm of back muscles          | 1                 |
| EGTON309  | Sore Neck                      | 1                 |
| N3321     | Solitary bone cyst             | 1                 |
| N0878     | Snapping shoulder              | 1                 |
| N32y      | Slipped radial epiphysis       | 1                 |
| N33zA     | Skeletal fluorosis             | 1                 |
| N002*     | Sicca (Sjogren's) syndrome     | 1                 |
| N2125     | Shoulder tendonitis            | 1                 |
| S50y      | Shoulder sprain NOS            | 1                 |
| N245-7    | Shoulder pain                  | 1                 |
| N245      | Shoulder pain                  | 1                 |
| N2457     | Shoulder pain                  | 1                 |
| N0951     | Shoulder joint stiffness       | 1                 |
| UNMAPPC0  | Shoulder injury                | 1                 |
| S221      | Shoulder fracture - open       | 1                 |
| N22y5     | Short tendon                   | 1                 |
| N011      | Sex acquired reactive arthrop  | 1                 |
| N0110     | Sex acqd reac arthrop-unspec   | 1                 |
| N0111     | Sex acqd reac arthrop-shoulder | 1                 |
| N011y     | Sex acqd reac arthrop-oth spec | 1                 |
| N011x     | Sex acqd reac arthrop-multiple | 1                 |
| N011z     | Sex acq reac arthropathy NOS   | 1                 |
| SRz0      | Severe multiple injuries       | 1                 |
| N047      | Seropositive erosive RA        | 1                 |
| N04X      | Seroposit rheum arthr unsp     | 1                 |
| N040P     | Seronegative rheumat arthritis | 1                 |
| EGTONSE2  | Sero-Negative Polyarthritis    | 1                 |
| N04y1     | Sero negative arthritis        | 1                 |
| N04y10    | Sero negative arthritis        | 1                 |
| N3301     | Senile osteoporosis            | 1                 |
| N2169     | Semimembranosus tendinitis     | 1                 |
| EGTON131  | Semi Frozen Shoulder           | 1                 |

| Read code  | Description                    | Number of studies |
|------------|--------------------------------|-------------------|
| N3y00      | Segmental & somatic dysfunctn  | 1                 |
| N0505      | Secondary multiple arthrosis   | 1                 |
| N050500    | Secondary multiple arthrosis   | 1                 |
| EMISNQSC20 | Scoliosis of thoracic spine    | 1                 |
| N374A      | Scoliosis in skelet dysplasia  | 1                 |
| N374C      | Scoliosis in neurofibromatosis | 1                 |
| N374D      | Scoliosis in conn tiss anomal  | 1                 |
| N3739      | Scoliosis due to oth treatment | 1                 |
| OX735AA    | Scoliosis Acquired /ox         | 1                 |
| N3743      | Scoliosis + other condition    | 1                 |
| N001       | Scleroderma                    | 1                 |
| OX353C     | Sciatica Chronic /ox           | 1                 |
| N1240      | Schmorl's nodes-unspec. region | 1                 |
| N1241      | Schmorl's nodes-thoracic regn. | 1                 |
| N124z      | Schmorl's nodes-region NOS     | 1                 |
| N1242      | Schmorl's nodes-lumbar region  | 1                 |
| N124       | Schmorl's nodes                | 1                 |
| N3201      | Scheuermann's disease          | 1                 |
| N2121      | Scapulohumeral fibrositis      | 1                 |
| N146z-1    | Sacroiliac strain              | 1                 |
| N1466      | Sacroiliac disorder            | 1                 |
| S5731      | Sacral/coccyx sprain           | 1                 |
| N0004      | SLE with pericarditis          | 1                 |
| N25        | SAPHO syndrome                 | 1                 |
| S5Q2       | Rupture supraspinatus tendon   | 1                 |
| S5Q1       | Rupture subscapularis tendon   | 1                 |
| S5U2       | Rupture patellar tendon        | 1                 |
| N2250      | Rupture of synovium unspecif.  | 1                 |
| N225z      | Rupture of synovium NOS        | 1                 |
| N2251-99   | Rupture of synovium - knee     | 1                 |
| N225       | Rupture of synovium            | 1                 |
| S5Q0       | Rupture infraspinatus tendon   | 1                 |
| N2251      | Ruptur poplit space synov cyst | 1                 |
| N2110      | Rotator cuff syndrome unspecif | 1                 |
| S504       | Rotator cuff sprain            | 1                 |
| N211       | Rotator cuff shoulder syndrome | 1                 |
| N2261      | Rotator cuff complete rupture  | 1                 |
| N3385      | Rotational mal-union of #      | 1                 |
| 182B       | Rib pain                       | 1                 |
| EGTON425   | Rheumatology                   | 1                 |
| N040N      | Rheumatoid vasculitis          | 1                 |
| N0422      | Rheumatoid nodule              | 1                 |
| N040R      | Rheumatoid nodule              | 1                 |
| N0421      | Rheumatoid lung disease        | 1                 |
| N040Q      | Rheumatoid bursitis            | 1                 |
| N0402      | Rheumatoid arthritis-shoulder  | 1                 |
| N0400      | Rheumatoid arthritis-Cx spine  | 1                 |
| N040D      | Rheumatoid arthritis of knee   | 1                 |
| N040       | Rheumatoid arthritis           | 1                 |
| N0403      | Rheumatoid arthr-sternoclav jt | 1                 |
| N0404      | Rheumatoid arthr-acromioclav j | 1                 |
| N1351      | Rheumatic torticollis          | 1                 |
| N0420      | Rheumatic carditis             | 1                 |



| Read code | Description                      | Number of studies |
|-----------|----------------------------------|-------------------|
| OX7149A   | Rheumatic Arthritis /ox          | 1                 |
| N040S     | Rheumat arthr - multiple joint   | 1                 |
| N2333     | Rhabdomyolysis                   | 1                 |
| N042z     | Rh.arthr.+visc/syst.dis.NOS      | 1                 |
| N080A     | Reverse Hill-Sachs lesion        | 1                 |
| N0871     | Reverse Bankart lesion           | 1                 |
| N12zA     | Resorption of thoracic disc      | 1                 |
| N12zE     | Resorption of lumbar disc        | 1                 |
| N12z6     | Resorption of cervical disc      | 1                 |
| N3732     | Resolving infant.idiopath.scol   | 1                 |
| N246      | Residual soft tiss.foreign bod   | 1                 |
| N339      | Residual foreign body in bone    | 1                 |
| Ny2       | Repetitive strain injury         | 1                 |
| N33z5     | Relapsing polychondritis         | 1                 |
| N337      | Reflex sympathetic dystrophy     | 1                 |
| N083      | Redislocation of joint           | 1                 |
| S46D      | Recurrent subluxation of patella | 1                 |
| N083D     | Recurrent sublux shoulder-post   | 1                 |
| N083F     | Recurrent sublux shoulder-inf    | 1                 |
| N083C     | Recurrent sublux shoulder-ant    | 1                 |
| N083H     | Recurrent sublux shoulder-ant    | 1                 |
| N083q     | Recurrent sublux - patella       | 1                 |
| N083z     | Recurrent joint dislocat.NOS     | 1                 |
| N0839     | Recurrent disloc-multip joints   | 1                 |
| N083B     | Recurrent disloc shoulder-post   | 1                 |
| N083E     | Recurrent disloc shoulder-inf    | 1                 |
| N083A     | Recurrent disloc shoulder-ant    | 1                 |
| N083G     | Recurrent disloc shoulder-ant    | 1                 |
| N083p     | Recurrent disloc - patella       | 1                 |
| N083n     | Recurrent disloc - knee          | 1                 |
| N0830     | Recurr.joint disloc.-site unsp   | 1                 |
| N0838     | Recurr.joint disloc-other spec   | 1                 |
| N0831     | Recur. disloc.- shoulder joint   | 1                 |
| N0836-99  | Recur. disloc. - knee joint      | 1                 |
| N083K     | Recur sublux shoulder-multidir   | 1                 |
| N083J     | Recur disloc shoulder-multidir   | 1                 |
| N1y0      | Rec atlantoax subl + myelopath   | 1                 |
| N01w0     | Reactive arthropathy-shoulder    | 1                 |
| N01w      | Reactive arthropathy unspecified | 1                 |
| N01wB     | Reactive arthropathy of knee     | 1                 |
| N038      | Reactive arthropathies           | 1                 |
| N01w2     | Reactive arthrop-sternoclav jt   | 1                 |
| N01w1     | Reactive arthr-acromioclav jt    | 1                 |
| EGTON436  | Radiculopathy                    | 1                 |
| N2422     | Radiculitis unspecified          | 1                 |
| N3734     | Radiation scoliosis              | 1                 |
| N3711     | Radiation kyphosis               | 1                 |
| N0706     | Radial tear of medial meniscus   | 1                 |
| N0717     | Radial tear of lateral meniscus  | 1                 |
| N2204     | Radial styloid tenosynovitis     | 1                 |
| N22yC     | Pyogenic infec - tendon sheath   | 1                 |
| N010      | Pyogenic arthritis               | 1                 |
| N0100     | Pyogenic arthr.-site unspecif.   | 1                 |

| Read code | Description                                                         | Number of studies |
|-----------|---------------------------------------------------------------------|-------------------|
| N0101     | Pyogenic arthr.-shoulder regn.                                      | 1                 |
| N010y     | Pyogenic arthr.-other specif.                                       | 1                 |
| N010x     | Pyogenic arthr.-multiple sites                                      | 1                 |
| N010z     | Pyogenic arthr.-NOS                                                 | 1                 |
| S57z0     | Pulled back muscle                                                  | 1                 |
| OX848ML   | Pulled Muscle /ox                                                   | 1                 |
| E2601     | Psychogenic Torticollis                                             | 1                 |
| N2373     | Pseudosarcomatous fibromatosis                                      | 1                 |
| N33zC     | Pseudarth after fusn/arthrodes                                      | 1                 |
| S5422     | Prt tr,knee,post cruciate lgmt                                      | 1                 |
| N12C4     | Prol lumb interv disc sciatic                                       | 1                 |
| N0010     | Progressive systemic sclerosis                                      | 1                 |
| N2311     | Progressive myositis ossific.                                       | 1                 |
| N3733     | Progressive infant.idiop.scol.                                      | 1                 |
| N051B     | Primary gonarthrosis, bilat                                         | 1                 |
| N050400   | Primary general osteoarthrosis                                      | 1                 |
| N0504     | Primary general osteoarthrosis                                      | 1                 |
| N0519     | Primary coxarthrosis bilateral                                      | 1                 |
| N051C     | Primary arthrosis of first carpometacarpal joints, bilateral        | 1                 |
| N2165     | Prepatellar bursitis                                                | 1                 |
| N3736     | Postural scoliosis                                                  | 1                 |
| N3307     | Postsurg malabsorp osteoporos                                       | 1                 |
| N3314     | Postsur malab osteop+path frct                                      | 1                 |
| NyX       | Postproc muscsk disord,unsp                                         | 1                 |
| N2313     | Postop.heterotopic calcificat.                                      | 1                 |
| N3306     | Postoophorectomy osteoporosis                                       | 1                 |
| N3312     | Postoophorc osteopor+path frct                                      | 1                 |
| N3302     | Postmenopausal osteoporosis                                         | 1                 |
| N331B     | Postmenop osteopor+path fract                                       | 1                 |
| N0380     | Postmeningococcal arthritis                                         | 1                 |
| N12Az     | Postlaminectomy syndrome NOS                                        | 1                 |
| N12A      | Postlaminectomy syndrome                                            | 1                 |
| N12A0     | Postlaminectomy syndr.unspec.                                       | 1                 |
| N0381     | Postinf arthropath in syphilis                                      | 1                 |
| N037      | Postimmunization arthropathy                                        | 1                 |
| N013      | Postdysenteric react arthrop                                        | 1                 |
| N0130     | Postdys react arthrop-unspec                                        | 1                 |
| N0131     | Postdys react arthrop-shoulder                                      | 1                 |
| N013y     | Postdys react arthrop-oth spec                                      | 1                 |
| N013x     | Postdys react arthrop-multiple                                      | 1                 |
| N013z     | Postdys react arthrop NOS                                           | 1                 |
| 16B4      | Post-traumatic bruising                                             | 1                 |
| N052B     | Post-traumatic arthrosis of first carpometacarpal joints, bilateral | 1                 |
| N052C     | Post-trauma gonarth, unilat                                         | 1                 |
| N052A     | Post-traum gonarthrosis, bilat                                      | 1                 |
| N0529     | Post-traum coxarthrosis, bilat                                      | 1                 |
| N3738     | Post-surgical scoliosis                                             | 1                 |
| N3721     | Post-laminectomy lordosis                                           | 1                 |
| N3712     | Post-laminectomy kyphosis                                           | 1                 |
| N2314     | Polymyositis ossificans                                             | 1                 |
| N004      | Polymyositis                                                        | 1                 |

| Read code | Description                    | Number of studies |
|-----------|--------------------------------|-------------------|
| N20*      | Polymyalgia rheumatica         | 1                 |
| N20       | Polymyalgia                    | 1                 |
| N065-1    | Polyarthropathy NEC            | 1                 |
| N065.11   | Polyarthropathy NEC            | 1                 |
| N065      | Polyarthropathy NEC            | 1                 |
| N065z     | Polyarthrititis                | 1                 |
| N065z00   | Polyarthrititis                | 1                 |
| N307z     | Poliomyelitis osteopathy NOS   | 1                 |
| N3070     | Polio.osteopathy-site unspecif | 1                 |
| N3071     | Polio.osteopathy-shoulder      | 1                 |
| N3078     | Polio.osteopathy-other sites   | 1                 |
| N3079     | Polio.osteopathy-multiple site | 1                 |
| N0109     | Pneumococc arthrit & polyarthr | 1                 |
| N2179     | Plantar fasciitis              | 1                 |
| N2209     | Plant thorn synovitis          | 1                 |
| N2161     | Pes anserinus tendin./bursitis | 1                 |
| SJz-98    | Peripheral nerve injury NOS    | 1                 |
| N21zz     | Peripheral enthesopathy NOS    | 1                 |
| N21       | Peripheral enthesopathies      | 1                 |
| N0705     | Periph detach-medial meniscus  | 1                 |
| N0716     | Periph detach-lateral meniscus | 1                 |
| N303      | Periostitis, no osteomyelitis  | 1                 |
| N303B     | Periostitis, no osteomye-th sp | 1                 |
| N303C     | Periostitis, no osteomye-lu sp | 1                 |
| N303A     | Periostitis, no osteomye-Cx sp | 1                 |
| N303z     | Periostitis no osteomyel NOS   | 1                 |
| N3030     | Periostitis - site unspecified | 1                 |
| N3031     | Periostitis - shoulder         | 1                 |
| N3038     | Periostitis - other sites      | 1                 |
| N3039     | Periostitis - multiple sites   | 1                 |
| N2120     | Periarthritis of shoulder      | 1                 |
| N21z1     | Periarthritis NOS              | 1                 |
| N3843     | Pedicular spondylolisthesis    | 1                 |
| N0432     | Pauciarticular juvenile R.A.   | 1                 |
| N0456     | Pauciartic onset juv ch arth   | 1                 |
| N331y     | Pathological fracture OS       | 1                 |
| N331z     | Pathological fracture NOS      | 1                 |
| N082z     | Pathological dislocation NOS   | 1                 |
| N331C     | Pathological # cervical vert   | 1                 |
| N0820     | Patholog.disloc.-site unspecif | 1                 |
| N0821     | Patholog.disloc.-shoulder      | 1                 |
| N0828     | Patholog.disloc.-other specif. | 1                 |
| N082A     | Path disloc-shoulder joint     | 1                 |
| N082R     | Path disloc-patellofem joint   | 1                 |
| N082B     | Path disloc-oth joint-shoulder | 1                 |
| N0829     | Path disloc-multiple joints    | 1                 |
| N082Q     | Path disloc-knee joint         | 1                 |
| N0536-1   | Patellofemoral osteoarthritis  | 1                 |
| N0536     | Patellofemoral osteoarthritis  | 1                 |
| N07y6     | Patellofemoral maltracking     | 1                 |
| N09A      | Patellofemoral disorder        | 1                 |
| N2266     | Patellar tendon nontraum.rupt. | 1                 |
| N2164     | Patellar tendinitis            | 1                 |

| Read code | Description                    | Number of studies |
|-----------|--------------------------------|-------------------|
| N33z9     | Partial epiphyseal arrest      | 1                 |
| S5421     | Part tr,knee,ant cruciate lgmt | 1                 |
| N2114     | Part thickn rotator cuff tear  | 1                 |
| S5411     | Part tear,knee,mdl collat lgmt | 1                 |
| S5401     | Part tear,knee,lat collat lgmt | 1                 |
| N1y2      | Pars interarticular strss frct | 1                 |
| N0704     | Parr beak tear-post/med menisc | 1                 |
| N0715     | Parr beak tear-post/lat menisc | 1                 |
| N2316     | Paralytic calcific/ossif muscl | 1                 |
| N243      | Panniculitis unspecified       | 1                 |
| N136      | Panniculitis of neck           | 1                 |
| N243z     | Panniculitis NOS               | 1                 |
| N093z     | Palindromic rheumatism NOS     | 1                 |
| N093      | Palindromic rheumatism         | 1                 |
| N0930     | Palindromic rheum.-site unspec | 1                 |
| N0931     | Palindromic rheum.-shoulder    | 1                 |
| N0938     | Palindromic rheum.-other spec. | 1                 |
| N0939     | Palindromic rheum.-multip.site | 1                 |
| N211z     | Painful arc syndrome           | 1                 |
| N211z-1   | Painful arc syndrome           | 1                 |
| EGTON224  | Painful Shoulder               | 1                 |
| EGTON279  | Painful Right Knee             | 1                 |
| N131-1    | Pain in cervical spine         | 1                 |
| N245-9    | Pain in buttock                | 1                 |
| N2453     | Pain in arm                    | 1                 |
| OX7280AD  | Pain Neck /ox                  | 1                 |
| OX7873E   | Pain Knee /ox                  | 1                 |
| N245-95   | Pain In Right Leg              | 1                 |
| N245-97   | Pain In Right Arm              | 1                 |
| N245-96   | Pain In Left Leg               | 1                 |
| N3101     | Paget's disease-thoracic spine | 1                 |
| N3106     | Paget's disease-scapula        | 1                 |
| N310F     | Paget's disease-patella        | 1                 |
| N310x     | Paget's disease-multiple sites | 1                 |
| N3102     | Paget's disease-lumbar spine   | 1                 |
| N3105     | Paget's disease-clavicle       | 1                 |
| N3100     | Paget's disease-cervical spine | 1                 |
| N310y     | Paget's disease OS             | 1                 |
| N310z     | Paget's disease NOS            | 1                 |
| N122-1    | PID - prolapsed lumbar disc    | 1                 |
| N129      | PID - prol i/v disc + myelop   | 1                 |
| S102y     | Othr spec clsd # thorac vert   | 1                 |
| S411y     | Othr opn trmtc disloctn shlder | 1                 |
| S410y     | Othr cls trmtc disloc shoulder | 1                 |
| SK12z     | Othershould/upperarminj.NOS    | 1                 |
| SE08      | Othercontusionneck             | 1                 |
| N06..00   | Other/unspecif. arthropathies  | 1                 |
| N12z2     | Other thoracic disc disorders  | 1                 |
| N22       | Other synovium/tendon/bursa    | 1                 |
| N22y      | Other synovium/tendon/bursa    | 1                 |
| N096B     | Other symptoms - sternoclav jt | 1                 |
| N096A     | Other symptoms - shoulder      | 1                 |
| N096M     | Other symptoms - knee          | 1                 |

| Read code | Description                                                 | Number of studies |
|-----------|-------------------------------------------------------------|-------------------|
| N096D     | Other symptoms - elbow                                      | 1                 |
| N096C     | Other symptoms - acromioclav j                              | 1                 |
| SD9y      | Other superficial injury, without mention of infection, NOS | 1                 |
| S5y       | Other sprains and strains                                   | 1                 |
| S5yz      | Other sprains NOS                                           | 1                 |
| N11y      | Other spondyloses/allied dis.                               | 1                 |
| S5W       | Other specified tendon rupture                              | 1                 |
| S54w      | Other specified knee sprain                                 | 1                 |
| SK1       | Other specified injury                                      | 1                 |
| N06y      | Other specified arthropathy                                 | 1                 |
| N233      | Other specific muscle disorder                              | 1                 |
| N04y      | Other specif.infl.polyarthrop.                              | 1                 |
| N32yz     | Other spec.osteochondrop.NOS                                | 1                 |
| N04yz     | Other spec.infl.polyarthr.NOS                               | 1                 |
| N00y      | Other spec.diff.collagen dis.                               | 1                 |
| N06y0     | Other spec.arthr.-site unspec.                              | 1                 |
| N06y1     | Other spec.arthr.-shoulder                                  | 1                 |
| N06y8     | Other spec.arthr.-other specif                              | 1                 |
| S5yy      | Other spec sprains and strains                              | 1                 |
| S50w      | Other shoulder sprain                                       | 1                 |
| SK122     | Other shoulder injuries                                     | 1                 |
| N212      | Other shoulder affections NEC                               | 1                 |
| N212z     | Other shoulder affect.NEC NOS                               | 1                 |
| SK121     | Other scapular region injuries                              | 1                 |
| N042      | Other rh.arthr.+visc/syst.dis.                              | 1                 |
| N3722     | Other post-surgical lordosis                                | 1                 |
| N21y      | Other periph. enthesopathies                                | 1                 |
| N3272     | Other osteochondr dissec-knee                               | 1                 |
| S466      | Other opn trm dslectn knee                                  | 1                 |
| S497      | Other open trmtc dislocation                                | 1                 |
| S49Fz     | Other open subluxation NOS                                  | 1                 |
| S4J3      | Other open #-subluxation                                    | 1                 |
| S4J1      | Other open #-dislocation                                    | 1                 |
| N226z     | Other nontraumatic tendon rupt                              | 1                 |
| SK10y     | Other neck injuries                                         | 1                 |
| SK1x      | Other multiple injuries                                     | 1                 |
| N12z3     | Other lumbar disc disorders                                 | 1                 |
| N07yy     | Other knee lig. old disruption                              | 1                 |
| SK170     | Other knee injury                                           | 1                 |
| N368      | Other knee deformity                                        | 1                 |
| N045      | Other juvenile arthritis                                    | 1                 |
| N326      | Other juven.osteochondroses                                 | 1                 |
| N0960     | Other joint sympt.-site unspec                              | 1                 |
| N0961     | Other joint sympt.-shoulder                                 | 1                 |
| N09y1     | Other joint dis.-shoulder                                   | 1                 |
| N08yz     | Other joint derange.NEC NOS                                 | 1                 |
| SK112     | Other interscapular injuries                                | 1                 |
| N07yz     | Other intern.knee derang.NOS                                | 1                 |
| SK1z      | Other injury NOS                                            | 1                 |
| N10y      | Other inflamm.spondylopathies                               | 1                 |
| N10yz     | Other inflamm.spondylop.NOS                                 | 1                 |
| N30y      | Other infections+bone disease                               | 1                 |

| Read code | Description                         | Number of studies |
|-----------|-------------------------------------|-------------------|
| N03x      | Other general dis.+arthropathy      | 1                 |
| N237z     | Other fibromatoses NOS              | 1                 |
| N237      | Other fibromatoses                  | 1                 |
| SK10z     | Other face and neck injuries NOS    | 1                 |
| S49z      | Other dislocation NOS               | 1                 |
| N12z0     | Other disc disorders unspecif.      | 1                 |
| N08       | Other derangement of joint          | 1                 |
| N36y      | Other deformity of bone             | 1                 |
| N37y      | Other curvatures of spine           | 1                 |
| N02yz     | Other crystal arthropathy NOS       | 1                 |
| N02y      | Other crystal arthropathies         | 1                 |
| N02y0     | Other crystal arth.-site unsp.      | 1                 |
| N02y1     | Other crystal arth.-shoulder        | 1                 |
| N02yy     | Other crystal arth.-other spec      | 1                 |
| N02yx     | Other crystal arth.-mult.sites      | 1                 |
| S465      | Other cls trm dslctn knee           | 1                 |
| S49E      | Other closed traumatic sublux       | 1                 |
| S4J2      | Other closed #-sublux               | 1                 |
| S4J0      | Other closed #-dislocation          | 1                 |
| N13yz     | Other cervical syndromes NOS        | 1                 |
| N13y      | Other cervical syndromes            | 1                 |
| N12z1     | Other cervical disc disorders       | 1                 |
| N33       | Other bone/cartilage disorders      | 1                 |
| N31y      | Other bone involve.in dis.EC        | 1                 |
| SK114     | Other back injuries                 | 1                 |
| N374X     | Other and unspecified kyphosis      | 1                 |
| N06       | Other and unspecified arthropathies | 1                 |
| S462      | Other acute meniscus tear           | 1                 |
| N38yz     | Other acquired deformity NOS        | 1                 |
| N38y      | Other acquired deformity            | 1                 |
| N38       | Other acquired deformity            | 1                 |
| S4J       | Other #-dslc or subluxation         | 1                 |
| N08y0     | Oth.joint deran.NEC-site unsp.      | 1                 |
| N08y1     | Oth.joint deran.NEC-shoulder        | 1                 |
| N08y8     | Oth.joint deran.NEC-other spec      | 1                 |
| N08y9     | Oth.joint deran.NEC-mult.sites      | 1                 |
| N30y0     | Oth.inf.+bone dis-site unspec.      | 1                 |
| N30y1     | Oth.inf.+bone dis-shoulder          | 1                 |
| N30y8     | Oth.inf.+bone dis-other sites       | 1                 |
| N30y9     | Oth.inf.+bone dis-multip.site       | 1                 |
| N30yz     | Oth.inf.+bone dis-NOS               | 1                 |
| N07y      | Oth. internal knee derangement      | 1                 |
| S49       | Oth, mlti+ill-def dislc/sublux      | 1                 |
| N0401     | Oth rheumatoid arthritis-spine      | 1                 |
| S49F      | Oth open traumatic subluxation      | 1                 |
| SRy       | Oth inj inv mult body reg NEC       | 1                 |
| S496      | Oth cls trmatic dislocation         | 1                 |
| S49Ez     | Oth closed subluxation NOS          | 1                 |
| N33B      | Osteoradionecrosis                  | 1                 |
| N3746     | Osteoporotic kyphosis               | 1                 |
| N3300     | Osteoporosis unspecified            | 1                 |
| N330C     | Osteoporosis localized spine        | 1                 |
| N330A     | Osteoporosis in endocr disord       | 1                 |

| Read code | Description                                             | Number of studies |
|-----------|---------------------------------------------------------|-------------------|
| N330z     | Osteoporosis NOS                                        | 1                 |
| N330      | Osteoporosis                                            | 1                 |
| N330D     | Osteoporos due corticosteroid                           | 1                 |
| N3309     | Osteopor,multiple myelomatosis                          | 1                 |
| N3319     | Osteopor path # thor vertebrae                          | 1                 |
| N3318     | Osteopor path # lumb vertebrae                          | 1                 |
| N331A     | Osteopor path # cerv vertebrae                          | 1                 |
| N3313     | Osteopor of disuse + path frct                          | 1                 |
| N09B      | Osteophyte                                              | 1                 |
| N307      | Osteopathy from poliomyelitis                           | 1                 |
| ASDFGOS1  | Osteopaenia                                             | 1                 |
| N334B     | Osteonecrosis in caisson dis                            | 1                 |
| N3349     | Osteonecrosis due to drugs                              | 1                 |
| N334A     | Osteonecr due to prev trauma                            | 1                 |
| N334C     | Osteonecr due haemoglobinopath                          | 1                 |
| N30       | Osteomyelitis/periostitis                               | 1                 |
| N302a     | Osteomyelitis of vertebra                               | 1                 |
| N302      | Osteomyelitis NOS                                       | 1                 |
| N33zH     | Osteolytic lesion                                       | 1                 |
| N33zD     | Osteolysis                                              | 1                 |
| N32z3     | Osteochondrosis NOS                                     | 1                 |
| N32z      | Osteochondropathy NOS                                   | 1                 |
| N32zz     | Osteochondropathy NOS                                   | 1                 |
| N32       | Osteochondropathies                                     | 1                 |
| N32z2     | Osteochondritis of knee                                 | 1                 |
| N3270     | Osteochondritis dissec-patella                          | 1                 |
| N327y     | Osteochondr dissec-other site                           | 1                 |
| N3274     | Osteochondr dissec-capitellum                           | 1                 |
| N327      | Osteochond dissecans                                    | 1                 |
| OX7130E   | Osteoarthritis Shoulder /ox                             | 1                 |
| OX7130B   | Osteoarthritis Knee(S) /ox                              | 1                 |
| OX7131A   | Osteoarthritis Cervical Spine /ox                       | 1                 |
| N11z      | Osteoarthritis spine                                    | 1                 |
| N11D1     | Osteoarthritis of thoracic spine                        | 1                 |
| N11D3     | Osteoarthritis of spine NOS                             | 1                 |
| N11-2     | Osteoarthritis of spine                                 | 1                 |
| N11D      | Osteoarthritis of spine                                 | 1                 |
| N11D2     | Osteoarthritis of lumbar spine                          | 1                 |
| N11D0     | Osteoarthritis of cervical spine                        | 1                 |
| N110-2    | Osteoarthritis cervical spine                           | 1                 |
| N05z0     | Osteoarthritis NOS-site unspec                          | 1                 |
| N05z000   | Osteoarthritis NOS-site unspec                          | 1                 |
| N05z7     | Osteoarthritis NOS-ankle/foot                           | 1                 |
| N05zM     | Osteoarthritis NOS, of tibio-fibular joint              | 1                 |
| N05zQ     | Osteoarthritis NOS, of talonavicular joint              | 1                 |
| N05zK     | Osteoarthritis NOS, of sacro-iliac joint                | 1                 |
| N05zR     | Osteoarthritis NOS, of other tarsal joint               | 1                 |
| N05zF     | Osteoarthritis NOS, of metacarpophalangeal joint        | 1                 |
| N05zT     | Osteoarthritis NOS, of lesser metatarsophalangeal joint | 1                 |
| N05zU     | Osteoarthritis NOS, of interphalangeal joint of toe     | 1                 |
| N05zD     | Osteoarthritis NOS, of distal radio-ulnar joint         | 1                 |
| N05zE     | Osteoarthritis NOS of wrist                             | 1                 |

| Read code | Description                      | Number of studies |
|-----------|----------------------------------|-------------------|
| N05z4     | Osteoarthritis NOS of the hand   | 1                 |
| N05z9     | Osteoarthritis NOS of shoulder   | 1                 |
| N05zL     | Osteoarthritis NOS of knee       | 1                 |
| N05zJ     | Osteoarthritis NOS of hip        | 1                 |
| N05zC     | Osteoarthritis NOS of elbow      | 1                 |
| N05zN     | Osteoarthritis NOS of ankle      | 1                 |
| N05zz00   | Osteoarthritis NOS               | 1                 |
| N05zz     | Osteoarthritis NOS               | 1                 |
| N05z1     | Osteoarthritis -shoulder joint   | 1                 |
| N05z800   | Osteoarthritis - other joint     | 1                 |
| N05z8     | Osteoarthritis - other joint     | 1                 |
| N05z6-99  | Osteoarthritis - knee joint      | 1                 |
| N05..11   | Osteoarthritis                   | 1                 |
| N094K     | Osteoarthritis                   | 1                 |
| N05       | Osteoarthritis                   | 1                 |
| N310      | Osteitis deformans-Paget's dis   | 1                 |
| N311      | Osteitis deformans+disease EC    | 1                 |
| N3350     | Osteitis condensans ilii         | 1                 |
| N335      | Osteitis condensans              | 1                 |
| N31       | Osteit.deform./osteop.+dis.EC    | 1                 |
| N3110     | Osteit deformans,neoplast dis    | 1                 |
| N3y03     | Osseous stenosis of neural canal | 1                 |
| N3y06     | Oss/sublux sten intervert foram  | 1                 |
| S900z     | Opn wound shoulder+up limb,NOS   | 1                 |
| SA10      | Opn wnd kneelg+ank-no cmplctn    | 1                 |
| S46A6     | Opn trmtc sublux,head fibula     | 1                 |
| S413z     | Opn trmtc sublux shoulder NOS    | 1                 |
| S468      | Opn trmtc sublux pat-fem jt      | 1                 |
| S46A0     | Opn trmtc sublux knee jt,unsp    | 1                 |
| S46A2     | Opn trmtc sublux knee jt,post    | 1                 |
| S46A4     | Opn trmtc sublux knee jt,ltrl    | 1                 |
| S46A1     | Opn trmtc sublux knee jt,ant     | 1                 |
| S46A      | Opn trmtc sublux knee jt         | 1                 |
| S4112     | Opn trmtc dslctn shldr jt,post   | 1                 |
| S411z     | Opn trmtc disloctn shouldr NOS   | 1                 |
| S4110     | Opn trmtc dislctn shoulder jnt   | 1                 |
| S49F4     | Opn trm sublux,st-clav jt,post   | 1                 |
| S49F3     | Opn trm sublux,st-clav jt,ant    | 1                 |
| S49F2     | Opn trm sublux st-clav jt        | 1                 |
| S4681     | Opn trm sublux pat-fem jt,med    | 1                 |
| S4680     | Opn trm sublux pat-fem jt,ltrl   | 1                 |
| S49F5     | Opn trm sublux laryngl cartlge   | 1                 |
| S46A5     | Opn trm sublux knee jt,rotatry   | 1                 |
| S46A3     | Opn trm sublux knee jt,medial    | 1                 |
| S4131     | Opn trm sublux acromio-clav jt   | 1                 |
| S4666     | Opn trm dslctn, head fibula      | 1                 |
| S464      | Opn trm dslctn patello-fem jt    | 1                 |
| S4641     | Opn trm dslctn pat-fem jt,med    | 1                 |
| S4640     | Opn trm dslctn pat-fem jt lat    | 1                 |
| S4660     | Opn trm dslctn knee, unsp        | 1                 |
| S4664     | Opn trm dslctn knee jt,lateral   | 1                 |
| S4662     | Opn trm dslctn knee jt, post     | 1                 |
| S4663     | Opn trm dslctn knee jt, medial   | 1                 |



| Read code | Description                     | Number of studies |
|-----------|---------------------------------|-------------------|
| S4661     | Opn trm dslctn knee jt, ant     | 1                 |
| S4665     | Opn trm dslct knee jt,rotatory  | 1                 |
| S4973     | Opn trm dslc, stern-clav jt,ant | 1                 |
| S4972     | Opn trm dslc sterno-clav jt     | 1                 |
| S4974     | Opn trm dsl, stern-clav jt,post | 1                 |
| S4114     | Opn trm dislc acromio-clav jt   | 1                 |
| S413      | Opn traumtc subluxatn shoulder  | 1                 |
| S4130     | Opn traumtc sublux shouldr jnt  | 1                 |
| S411      | Opn traumtc disloctn shoulder   | 1                 |
| S4115     | Opn traumatic disloctn scapula  | 1                 |
| S49B      | Opn sublux thrcic+lmbr vertbra  | 1                 |
| S49B1     | Opn sublux thoracic spine       | 1                 |
| S499x     | Opn sublux mlti cerv vertebrae  | 1                 |
| S499z     | Opn sublux cerv vertebra NOS    | 1                 |
| S4991     | Opn sublux atlanto-occipitl jt  | 1                 |
| S493C     | Opn spnl dslc+cauda equina lsn  | 1                 |
| S4934     | Opn spnl dslc+ant thrc crd lsn  | 1                 |
| S4939     | Opn spnl dslc+ant lmbr crd lsn  | 1                 |
| S491B     | Opn spnl dslc+ant cerv crd lsn  | 1                 |
| S493B     | Opn spnl dsl+post lmbr crd lsn  | 1                 |
| S491D     | Opn spnl dsl+post cerv crd lsn  | 1                 |
| S4933     | Opn spnl dsl+comp thrc crd lsn  | 1                 |
| S4938     | Opn spnl dsl+comp lmbr crd lsn  | 1                 |
| S4919     | Opn spnl dsl+cerv crd lsn,unsp  | 1                 |
| S4932     | Opn spn dslc+thrc crd lsn,unsp  | 1                 |
| S4936     | Opn spn dslc+post thrc crd lsn  | 1                 |
| S491C     | Opn spn dslc+ctrl cerv crd lsn  | 1                 |
| S491A     | Opn spn dslc+comp cerv crd lsn  | 1                 |
| S4935     | Opn spn dslc+cent thrc crd lsn  | 1                 |
| S493A     | Opn spn dslc+cent lmbr crd lsn  | 1                 |
| S1150     | Opn spn # + unsp lumb crd lesn  | 1                 |
| S1154     | Opn spn # + post lumb crd lesn  | 1                 |
| S1151     | Opn spn # + comp lumb crd lesn  | 1                 |
| S1153     | Opn spn # + cent lumb crd lesn  | 1                 |
| S1155     | Opn spn # + cauda equina lesn   | 1                 |
| S1152     | Opn spn # + ant lumbr crd lesn  | 1                 |
| S5P1z     | Opn dvsn,thyroid regn lgmt NOS  | 1                 |
| S5P1      | Opn dvsn,thyroid region lgmt    | 1                 |
| S5P12     | Opn dvsn,thyroid cartilge lgmt  | 1                 |
| S5P30     | Opn dvsn, sternoclavicular lgmt | 1                 |
| S5N       | Opn dvsn,lgmt other part back   | 1                 |
| S5P11     | Opn dvsn,cricothyroid ligament  | 1                 |
| S5P10     | Opn dvsn,cricoarytenoid lgmt    | 1                 |
| S5K1      | Opn dvsn mdl collat lgmt knee   | 1                 |
| S5K0      | Opn dvsn lat collat lgmt knee   | 1                 |
| S5F1      | Opn dvsn coracoclavicular lgmt  | 1                 |
| S5F0      | Opn dvsn acromioclavic lgmt     | 1                 |
| S5K2      | Opn dvs post cruciate lgm knee  | 1                 |
| S5K3      | Opn dvs ant cruciate lgmt knee  | 1                 |
| S4931     | Opn dslc thoracic spine         | 1                 |
| S4975     | Opn dslc laryngl cartilage      | 1                 |
| S1034     | Opn # thorc vert-trnsvrse prcs  | 1                 |
| S1032     | Opn # thorc vert-spondylolysis  | 1                 |

| Read code | Description                                            | Number of studies |
|-----------|--------------------------------------------------------|-------------------|
| S1033     | Opn # thorc vert-spinous prcs                          | 1                 |
| S1036     | Opn # thor vert-tricolumnar                            | 1                 |
| S1035     | Opn # thor vert-posterior arch                         | 1                 |
| S1055     | Opn # lumb vert,posterior arch                         | 1                 |
| S1054     | Opn # lumb vert, trnsvrse prcs                         | 1                 |
| S1056     | Opn # lumb vert, tricolumnar                           | 1                 |
| S1052     | Opn # lumb vert, spondylolysis                         | 1                 |
| S1053     | Opn # lumb vert, spinous prcs                          | 1                 |
| S101L     | Opn # cerv vert, trnsvrse prcs                         | 1                 |
| S101N     | Opn # cerv vert, tricolumnar                           | 1                 |
| S101J     | Opn # cerv vert, spondylolysis                         | 1                 |
| S101K     | Opn # cerv vert, spinous prcs                          | 1                 |
| S101M     | Opn # cerv vert, post arch                             | 1                 |
| S101D     | Opn # axis, trnsvrse process                           | 1                 |
| S1018     | Opn # atlas-isol arch/art prcs                         | 1                 |
| S89z      | Open wounds NOS                                        | 1                 |
| S90       | Open wound shoulder/upper limb                         | 1                 |
| S9020     | Open wound shoulder+tendon inv                         | 1                 |
| S9010     | Open wound shoulder+complicat.                         | 1                 |
| S9021     | Open wound scapular+tendon inv                         | 1                 |
| S900      | Open wound of shoulder/upper limb without complication | 1                 |
| S9000     | Open wound of shoulder region                          | 1                 |
| S87       | Open wound of sacroiliac reg.                          | 1                 |
| S84       | Open wound of neck                                     | 1                 |
| SA100     | Open wound of knee                                     | 1                 |
| S86       | Open wound of back                                     | 1                 |
| SA110     | Open wound knee+complication                           | 1                 |
| S8z       | Open wound head/neck/trunk NOS                         | 1                 |
| S8        | Open wound head/neck/trunk                             | 1                 |
| S113z     | Open thoracic #+cord lesn.NOS                          | 1                 |
| S113      | Open thoracic #+cord lesion                            | 1                 |
| S49Dz     | Open subluxation of spine NOS                          | 1                 |
| S49B0     | Open subluxation lumbar spine                          | 1                 |
| S4998     | Open subluxation C7/T1                                 | 1                 |
| S4997     | Open subluxation C6/C7                                 | 1                 |
| S4996     | Open subluxation C5/C6                                 | 1                 |
| S4995     | Open subluxation C4/C5                                 | 1                 |
| S4994     | Open subluxation C3/C4                                 | 1                 |
| S4993     | Open subluxation C2/C3                                 | 1                 |
| S49D0     | Open sublux spine, unspecified                         | 1                 |
| S49D      | Open sublux other vertebra                             | 1                 |
| S4990     | Open sublux cerv spine, unsp                           | 1                 |
| S499      | Open sublux cerv spine                                 | 1                 |
| S4992     | Open sublux atlanto-axial jt                           | 1                 |
| S49y      | Open multiple/ill-def.disloc.                          | 1                 |
| S2921     | Open mult fract clav scap hum                          | 1                 |
| S115      | Open lumbar # + cord lesion                            | 1                 |
| S2115     | Open fracture scapula, spine                           | 1                 |
| S2116     | Open fracture scapula, neck                            | 1                 |
| S2113     | Open fracture scapula, glenoid                         | 1                 |
| S2114     | Open fracture scapula, blade                           | 1                 |
| S321      | Open fracture of the patella                           | 1                 |

| Read code | Description                       | Number of studies |
|-----------|-----------------------------------|-------------------|
| S105      | Open fracture lumbar vertebra     | 1                 |
| S1260     | Open fracture larynx              | 1                 |
| S2012     | Open fracture clavicle, shaft     | 1                 |
| S101      | Open fracture cervical spine      | 1                 |
| S1012     | Open fracture axis                | 1                 |
| S1011     | Open fracture atlas               | 1                 |
| S5N0      | Open divsn, neck ligament         | 1                 |
| S5Fz      | Open divsn shoulder lgmt NOS      | 1                 |
| S4911     | Open dslc atlanto-occipital jt    | 1                 |
| S4912     | Open dslc atlanto-axial jt        | 1                 |
| S5Nz      | Open divisn, back ligament NOS    | 1                 |
| S5N1      | Open division, thoracic lgmt      | 1                 |
| S5P       | Open division, other ligament     | 1                 |
| S5Pz      | Open division, other lig NOS      | 1                 |
| S5N2      | Open division, lumbar ligament    | 1                 |
| S5F       | Open division shoulder lgmt       | 1                 |
| S5Ky      | Open division other knee lgmt     | 1                 |
| S5M5      | Open division lumbosacral lgmt    | 1                 |
| S5K       | Open division ligament knee       | 1                 |
| S5Kz      | Open division knee lgmt NOS       | 1                 |
| S5M4      | Open division iliolumbar lgmt     | 1                 |
| S4950     | Open dislocation spine unspc.     | 1                 |
| S495z     | Open dislocation spine NOS        | 1                 |
| S491      | Open dislocation of neck          | 1                 |
| S4930     | Open dislocation lumbar spine     | 1                 |
| S466z     | Open dislocation knee NOS         | 1                 |
| S497z     | Open dislocation NOS              | 1                 |
| S4918     | Open dislocation C7/T1            | 1                 |
| S4917     | Open dislocation C6/C7            | 1                 |
| S4916     | Open dislocation C5/C6            | 1                 |
| S4915     | Open dislocation C4/C5            | 1                 |
| S4914     | Open dislocation C3/C4            | 1                 |
| S4913     | Open dislocation C2/C3            | 1                 |
| S493      | Open disloc. thoracic/lumbar      | 1                 |
| S493z     | Open disloc. thorac./lumbar NOS   | 1                 |
| S495      | Open disloc. other vertebra       | 1                 |
| S491x     | Open disloc. mult. cerv. vertebra | 1                 |
| S491z     | Open disloc. cervical vert. NOS   | 1                 |
| S4910     | Open disloc. cerv. spine unspc.   | 1                 |
| S111z     | Open cervical#+cord lesion NOS    | 1                 |
| S111      | Open cervical#+cord lesion        | 1                 |
| S1263     | Open #trachea                     | 1                 |
| S1262     | Open #thyroid cartilage           | 1                 |
| S11y      | Open #spine+cord lesion unsp.     | 1                 |
| S2110     | Open #scapula-unspecified         | 1                 |
| S211z     | Open #scapula NOS                 | 1                 |
| S126z     | Open #larynx/trachea NOS          | 1                 |
| S1261     | Open #hyoid bone                  | 1                 |
| S2010     | Open #clavicle unspecified        | 1                 |
| S201z     | Open #clavicle NOS                | 1                 |
| S3z1      | Open #bones unspecified           | 1                 |
| S4F7      | Open #-sublux, patello-fem jt     | 1                 |
| S4J33     | Open #-sublux st-clav jt, post    | 1                 |

| Read code | Description                    | Number of studies |
|-----------|--------------------------------|-------------------|
| S4J32     | Open #-sublux st-clav jt,ant   | 1                 |
| S4A30     | Open #-sublux shoulder joint   | 1                 |
| S4A3      | Open #-sublux shoulder         | 1                 |
| S4F3      | Open #-sublux knee joint       | 1                 |
| S4A31     | Open #-sublux acrom-clav joint | 1                 |
| S4F5      | Open #-dslc,patello-fem jt     | 1                 |
| S4F1      | Open #-dslc, knee joint        | 1                 |
| S4J13     | Open #-dslc st-clav jt,post    | 1                 |
| S4J12     | Open #-dslc st-clav jt,ant     | 1                 |
| S4A10     | Open #-dslc shoulder joint     | 1                 |
| S4A1      | Open #-dslc shoulder           | 1                 |
| S4A11     | Open #-dslc acrom-clav joint   | 1                 |
| S1010     | Open # unsp cerv vertebra      | 1                 |
| S103      | Open # thoracic vertebra       | 1                 |
| S1031     | Open # thorac vert, wedge      | 1                 |
| S1030     | Open # thorac vert, burst      | 1                 |
| S1013     | Open # third cerv vertebra     | 1                 |
| S10y      | Open # spine, unspecif         | 1                 |
| S1016     | Open # sixth cerv vertebra     | 1                 |
| S1017     | Open # seventh cerv vert       | 1                 |
| S2112     | Open # scapula, coracoid       | 1                 |
| S2111     | Open # scapula, acromion       | 1                 |
| S211      | Open # scapula                 | 1                 |
| S3213     | Open # patella, vertical       | 1                 |
| S3210     | Open # patella, transverse     | 1                 |
| S3214     | Open # patella, stellate       | 1                 |
| S3211     | Open # patella, proximal pole  | 1                 |
| S3212     | Open # patella, distal pole    | 1                 |
| S1051     | Open # lumbar vert, wedge      | 1                 |
| S1050     | Open # lumbar vert, burst      | 1                 |
| S126      | Open # larynx and trachea      | 1                 |
| S1014     | Open # fourth cerv vertebra    | 1                 |
| S1015     | Open # fifth cerv vertebra     | 1                 |
| S2011     | Open # clavicle, medial end    | 1                 |
| S2013     | Open # clavicle, lateral end   | 1                 |
| S201      | Open # clavicle                | 1                 |
| S101H     | Open # cerv vert, wedge        | 1                 |
| S101G     | Open # cerv vert, burst        | 1                 |
| S101z     | Open # cerv spine NOS          | 1                 |
| S101F     | Open # axis, tricolumnar       | 1                 |
| S101B     | Open # axis, spondylolysis     | 1                 |
| S101C     | Open # axis, spinous procss    | 1                 |
| S101E     | Open # axis, posterior arch    | 1                 |
| S101A     | Open # axis, odontoid prcss    | 1                 |
| S1019     | Open # atlas, comminuted       | 1                 |
| S4113     | Op tr ds shd jt,inf(infr-glen) | 1                 |
| S4111     | Op tr dis shld jt,ant(sub-cor) | 1                 |
| S49Bz     | Op sublx thrc+lmbr vertbra NOS | 1                 |
| S49B2     | Op spn sublx+thrc crd lsn,unsp | 1                 |
| S49B6     | Op spn sublx+post thrc crd lsn | 1                 |
| S49BB     | Op spn sublx+post lmbr crd lsn | 1                 |
| S49B7     | Op spn sublx+lmbr crd lsn,unsp | 1                 |
| S49B3     | Op spn sublx+comp thrc crd lsn | 1                 |

| Read code | Description                                                                | Number of studies |
|-----------|----------------------------------------------------------------------------|-------------------|
| S49B8     | Op spn sublx+comp lmb crd lsn                                              | 1                 |
| S499A     | Op spn sublx+comp cerv crd lsn                                             | 1                 |
| S499C     | Op spn sublx+cntrl crv crd lsn                                             | 1                 |
| S4999     | Op spn sublx+cerv crd lsn,unsp                                             | 1                 |
| S49B5     | Op spn sublx+cent thrc crd lsn                                             | 1                 |
| S49BA     | Op spn sublx+cent lmb crd lsn                                              | 1                 |
| S49BC     | Op spn sublx+cauda equina lsn                                              | 1                 |
| S49B4     | Op spn sublx+ant thrc crd lsn                                              | 1                 |
| S499D     | Op spn sublux+post crv crd lsn                                             | 1                 |
| S49B9     | Op spn sublux+ant lmb crd lsn                                              | 1                 |
| S499B     | Op spn sublux+ant cerv crd lsn                                             | 1                 |
| S4937     | Op spn dsl+lmb crd lsn unsp                                                | 1                 |
| S1134     | Op spn #+pst thor crd lsn,T1-6                                             | 1                 |
| S1133     | Op spn #+cnt thor crd lsn,T1-6                                             | 1                 |
| S1132     | Op spn #+ant thor crd lsn,T1-6                                             | 1                 |
| S115z     | Op spn # incmp lmb crd lsn NOS                                             | 1                 |
| S1130     | Op sp #+unsp thor crd lsn,T1-6                                             | 1                 |
| S1136     | Op sp #+unsp thor cd lsn,T7-12                                             | 1                 |
| S113A     | Op sp #+pst thor crd lsn,T7-12                                             | 1                 |
| S1139     | Op sp #+cnt thor crd lsn,T7-12                                             | 1                 |
| S1131     | Op sp #+cmpl thor crd lsn,T1-6                                             | 1                 |
| S1137     | Op sp #+cmp thor crd lsn,T7-12                                             | 1                 |
| S1138     | Op sp #+ant thor crd lsn,T7-12                                             | 1                 |
| S1501     | Op multi fractur of thor spine                                             | 1                 |
| SR161     | Op fract/th with lw bck+plv+lmb                                            | 1                 |
| SR101     | Op fract invol head with neck                                              | 1                 |
| S113B     | Op # T7-12incomp cord lsn NOS                                              | 1                 |
| S1135     | Op # T1-6 incomp cord lsn NOS                                              | 1                 |
| S1116     | Op # C5-7 unspec cord lesion                                               | 1                 |
| S111A     | Op # C5-7 posterior cord lesn                                              | 1                 |
| S111B     | Op # C5-7 incomp cord les NOS                                              | 1                 |
| S1117     | Op # C5-7 compl cord lesion                                                | 1                 |
| S1119     | Op # C5-7 central cord les                                                 | 1                 |
| S1118     | Op # C5-7 anterior cord les                                                | 1                 |
| S1110     | Op # C1-C4 unspec cord les                                                 | 1                 |
| S1114     | Op # C1-4 post cord lesion                                                 | 1                 |
| S1115     | Op # C1-4 cord les. NOS                                                    | 1                 |
| S1111     | Op # C1-4 compl cord lesion                                                | 1                 |
| S1113     | Op # C1-4 cent cord lesion                                                 | 1                 |
| S1112     | Op # C1-4 ant cord lesion                                                  | 1                 |
| N1120     | One lev th spondyl-no myelop                                               | 1                 |
| N11B0     | One lev th spondyl + radiculop                                             | 1                 |
| N1130     | One lev th spondyl + myelop                                                | 1                 |
| N1140     | One lev lumbsac spond-no myelo                                             | 1                 |
| N1150     | One lev lumbsac spond + myelop                                             | 1                 |
| N1100     | One lev Cx spondyl-no myelop                                               | 1                 |
| N1190     | One lev Cx spondyl + radiculop                                             | 1                 |
| N1110     | One lev Cx spondyl + myelop                                                | 1                 |
| N0542     | Oligoarticular osteoarthritis, unspecified, of upper arm                   | 1                 |
| N0545     | Oligoarticular osteoarthritis, unspecified, of the pelvic region and thigh | 1                 |
| N0546     | Oligoarticular osteoarthritis, unspecified, of lower leg                   | 1                 |

| Read code | Description                                                   | Number of studies |
|-----------|---------------------------------------------------------------|-------------------|
| N0544     | Oligoarticular osteoarthritis, unspecified, of hand           | 1                 |
| N0543     | Oligoarticular osteoarthritis, unspecified, of forearm        | 1                 |
| N0547     | Oligoarticular osteoarthritis, unspecified, of ankle and foot | 1                 |
| N054      | Oligoarticular OA unspecified                                 | 1                 |
| N0541     | Oligoartic OA, unspec-shoulder                                | 1                 |
| N0549     | Oligoartic OA, unspec-multiple                                | 1                 |
| N0540     | Oligoartic OA, unsp-unsp sites                                | 1                 |
| N0548     | Oligoartic OA unspec-oth site                                 | 1                 |
| N2133     | Olecranon bursitis                                            | 1                 |
| N0720     | Old torn meniscus of knee                                     | 1                 |
| N070B     | Old tear post horn med menis                                  | 1                 |
| N070A     | Old tear of medial meniscus                                   | 1                 |
| N071C     | Old tear of lateral meniscus                                  | 1                 |
| N07y9     | Old post/lat caps complex tear                                | 1                 |
| N07y3     | Old post.cruciate lig.disrupt.                                | 1                 |
| N07yF     | Old part tear post cruciat lig                                | 1                 |
| N07yA     | Old part tear med collat lig                                  | 1                 |
| N07y7     | Old part tear lat collat lig                                  | 1                 |
| N07yD     | Old part tear ant cruciate lig                                | 1                 |
| N07y1     | Old med.collat.lig.disruption                                 | 1                 |
| N07yC     | Old med capsular complex tear                                 | 1                 |
| N07y0     | Old lat.collat.lig.disruption                                 | 1                 |
| N07yB     | Old compl tear med collat lig                                 | 1                 |
| N07y8     | Old compl tear lat collat lig                                 | 1                 |
| N07yG     | Old comp tear post cruciat lig                                | 1                 |
| N07yE     | Old comp tear ant cruciate lig                                | 1                 |
| N07y4     | Old capsular knee lig.disrupt.                                | 1                 |
| N0701     | Old bucket handle tear-medial                                 | 1                 |
| N0711     | Old bucket handle tear-lat men                                | 1                 |
| N07y2     | Old ant.cruciate lig.disrupt.                                 | 1                 |
| N067      | Ochronotic arthropathy                                        | 1                 |
| N054z     | OA,1 site +,unspecified NOS                                   | 1                 |
| N05zP     | OA NOS-subtalar joint                                         | 1                 |
| N05zA     | OA NOS-sternoclavicular joint                                 | 1                 |
| N05zB     | OA NOS-acromioclavicular join                                 | 1                 |
| N05zG     | OA NOS-PIP joint of finger                                    | 1                 |
| N05zH     | OA NOS-DIP joint of finger                                    | 1                 |
| N05zS     | OA NOS-1st MTP joint                                          | 1                 |
| N3381     | Nonunion of fracture                                          | 1                 |
| N226      | Nontraumatic tendon subluxatn                                 | 1                 |
| N23y2     | Nontraumatic muscle rupture                                   | 1                 |
| N2260     | Nontraum.unspec.tendon rupture                                | 1                 |
| N392      | Nonallopathic lesion-thoracic                                 | 1                 |
| N393      | Nonallopathic lesion-lumbar                                   | 1                 |
| N391      | Nonallopathic lesion-cervical                                 | 1                 |
| N082Z     | Non-trau subl acromiocl joint                                 | 1                 |
| N044      | Nodular fibrositis-chr. rheum.                                | 1                 |
| N2372     | Nodular fasciitis                                             | 1                 |
| 16A1      | No stiff neck                                                 | 1                 |
| 16C1      | No backache                                                   | 1                 |
| 1229      | No FH: Osteoporosis                                           | 1                 |
| N2471     | Night cramps                                                  | 1                 |

| Read code  | Description                           | Number of studies |
|------------|---------------------------------------|-------------------|
| N11y2      | Neuropathic spondylopathy             | 1                 |
| N2423      | Neuropathic pain                      | 1                 |
| N374B      | Neuromuscular scoliosis               | 1                 |
| N3749      | Neuromuscular lordosis                | 1                 |
| N3745      | Neuromuscular kyphosis                | 1                 |
| N14A       | Neurogenic claudication               | 1                 |
| N2421      | Neuritis unspecified                  | 1                 |
| N2420      | Neuralgia unspecified                 | 1                 |
| N242z      | Neuralg./neurit./radiculit.NOS        | 1                 |
| N242       | Neuralg./neurit./radicul.unsp.        | 1                 |
| SJ         | Nerve/spinal cord injuries            | 1                 |
| EMISNQNE5  | Nerve root pain present               | 1                 |
| SJz        | Nerve and spinal cord injury NOS      | 1                 |
| S5700      | Neck sprain unspecified               | 1                 |
| S570z      | Neck sprain NOS                       | 1                 |
| S570       | Neck sprain                           | 1                 |
| N12D       | Narrowing disc space                  | 1                 |
| N2332      | Myositis in sarcoidosis               | 1                 |
| N2321      | Myofibrosis                           | 1                 |
| N241-97    | Myalgia/myositis - shoulder           | 1                 |
| EGTON307   | Myalgia                               | 1                 |
| EMISNQMU15 | Musculoskeletal symptom               | 1                 |
| EMISNQMU5  | Musculoskeletal pain severe           | 1                 |
| EMISNQMU2  | Musculoskeletal pain present          | 1                 |
| EMISNQMU4  | Musculoskeletal pain moderate         | 1                 |
| N096-2     | Musculoskeletal pain - joints         | 1                 |
| MAWBYMU1   | Musculoskeletal Symptoms              | 1                 |
| N3         | Musculosk.inflam/deform.+other        | 1                 |
| N232z      | Muscle wasting/atrophy NEC NOS        | 1                 |
| N232       | Muscle wasting and disuse atrophy NEC | 1                 |
| N2322      | Muscle wasting NEC                    | 1                 |
| UNMAPM4AB  | Muscle strain                         | 1                 |
| N23yD      | Muscle strain                         | 1                 |
| N2410-2    | Muscle pain                           | 1                 |
| N231       | Muscle ossification                   | 1                 |
| S5yz1      | Muscle injury / strain                | 1                 |
| N238       | Muscle contracture                    | 1                 |
| N231z      | Muscle calcif./ossificat.NOS          | 1                 |
| N230D      | Muscle abscess-shoulder               | 1                 |
| N230B      | Muscle abscess-neck                   | 1                 |
| N230C      | Muscle abscess-back                   | 1                 |
| N230A      | Muscle abscess                        | 1                 |
| ASDFGMU2   | Muscle Symptoms                       | 1                 |
| EGTON110   | Muscle Injury                         | 1                 |
| M4A8       | Muscle Injury                         | 1                 |
| N2310      | Musc.calcif./ossif.unspecified        | 1                 |
| N0719      | Multiple tears-lat meniscus           | 1                 |
| N0708      | Multiple tears of medial meniscus     | 1                 |
| S101x      | Multiple open # cerv vert             | 1                 |
| SR1z       | Multiple fractures unspecified        | 1                 |
| S100x      | Multiple clsd # cerv vert             | 1                 |
| N099A      | Multiple clicking joints              | 1                 |
| S3y        | Multiple #legs/arms/ribs/stern        | 1                 |

| Read code   | Description                                | Number of studies |
|-------------|--------------------------------------------|-------------------|
| S10A2       | Multip fracture/cervical spin              | 1                 |
| N11C2       | Multi lev lumbsac spond+radicu             | 1                 |
| S150        | Multi fractures/thoracic spine             | 1                 |
| S3y1        | Mult.open #legs/arms/ribs                  | 1                 |
| S3y0        | Mult.closed #legs/arms/ribs                | 1                 |
| N1122       | Mult lev th spondyl-no myelop              | 1                 |
| N11B2       | Mult lev th spondyl+radiculop              | 1                 |
| N1132       | Mult lev th spondyl + myelop               | 1                 |
| N1142       | Mult lev lumbsac spond-no myel             | 1                 |
| N1152       | Mult lev lumbsac spond + myelo             | 1                 |
| N1102       | Mult lev Cx spondyl-no myelop              | 1                 |
| N1192       | Mult lev Cx spondyl+radiculop              | 1                 |
| N1112       | Mult lev Cx spondyl + myelop               | 1                 |
| S10B6       | Mult fractur/lumbar spine+pelv             | 1                 |
| S292        | Mult fract/clav,scapula+humrus             | 1                 |
| 1D17        | Morning stiffness - joint                  | 1                 |
| N3323       | Monostotic fibrous dysplasia               | 1                 |
| N0433       | Monarticular juvenile R.A.                 | 1                 |
| EMISNQMI188 | Mixed connective tissue disease            | 1                 |
| OX6954MC    | Mixed Connective Tissue Disease /ox        | 1                 |
| N2224       | Miners' knee                               | 1                 |
| N2172       | Metatarsalgia NOS                          | 1                 |
| N063.11     | Menopausal arthritis                       | 1                 |
| N063        | Menopausal arthritis                       | 1                 |
| N072        | Meniscus derangement NEC                   | 1                 |
| N070        | Medial meniscus derangement                | 1                 |
| N070z       | Medial meniscus derange.NOS                | 1                 |
| N0703       | Medial menisc.post.horn derang             | 1                 |
| N0700       | Medial menisc.derang.unspecif              | 1                 |
| N0702       | Medial menisc.ant.horn derang.             | 1                 |
| N2131       | Medial epicondylitis - elbow               | 1                 |
| 16CA        | Mechanical low back pain                   | 1                 |
| N3380       | Malunion of fracture                       | 1                 |
| N338        | Malunion and nonunion of fracture          | 1                 |
| N11C        | Lumbosacral spondylosis with radiculopathy | 1                 |
| N115        | Lumbosacral spond.+ myelopathy             | 1                 |
| SJ35        | Lumbosacral plexus injury                  | 1                 |
| N1441       | Lumbosacral neuritis unspecif.             | 1                 |
| N1463       | Lumbosacral instability                    | 1                 |
| N1460       | Lumbosacral ankylosis                      | 1                 |
| N114-2      | Lumbar spondylosis                         | 1                 |
| N148C       | Lumbar spine instability                   | 1                 |
| N1486       | Lumbar spine ankylosis                     | 1                 |
| N1402       | Lumbar spinal stenosis                     | 1                 |
| N12A3       | Lumbar postlaminectomy syndr.              | 1                 |
| SJ321       | Lumbar nerve root injury - L2              | 1                 |
| N12zC       | Lumbar discitis                            | 1                 |
| N122        | Lumbar disc displacement                   | 1                 |
| N1293       | Lumbar disc disord.+myelopathy             | 1                 |
| N127        | Lumbar disc degeneration                   | 1                 |
| S572        | Lumbar back sprain                         | 1                 |
| N1420       | Lumbago with sciatica                      | 1                 |
| N142-4      | Lumbago                                    | 1                 |



| Read code | Description                                                        | Number of studies |
|-----------|--------------------------------------------------------------------|-------------------|
| N140A     | Lu spin stenosis due to oth dis                                    | 1                 |
| N12C2     | Lu disc prolapse+radiculopathy                                     | 1                 |
| N12B2     | Lu disc prolapse + myelopathy                                      | 1                 |
| N12C3     | Lu disc prol+caud eq compress                                      | 1                 |
| N142-1    | Low back pain                                                      | 1                 |
| EGTON264  | Low Back Pain                                                      | 1                 |
| N374W     | Lordosis unspecified                                               | 1                 |
| N3747     | Lordosis in skeletal dysplasia                                     | 1                 |
| N3748     | Lordosis in hip disease                                            | 1                 |
| N3742     | Lordosis + other condition                                         | 1                 |
| N0818     | Loose joint body-multip joints                                     | 1                 |
| N081z     | Loose joint body (ex.knee)NOS                                      | 1                 |
| N081A     | Loose body, oth joint-shoulder                                     | 1                 |
| N0811     | Loose body joint-shoulder                                          | 1                 |
| N0819     | Loose body in shoulder joint                                       | 1                 |
| N073      | Loose body in knee                                                 | 1                 |
| N081      | Loose body in joint-excl.knee                                      | 1                 |
| N0817     | Loose body in joint, joint OS                                      | 1                 |
| N0810     | Loose body in joint                                                | 1                 |
| N07yH     | Locking knee                                                       | 1                 |
| N07y5     | Locked knee                                                        | 1                 |
| N0522     | Localised, secondary osteoarthritis of the upper arm               | 1                 |
| N0525     | Localised, secondary osteoarthritis of the pelvic region and thigh | 1                 |
| N0526     | Localised, secondary osteoarthritis of the lower leg               | 1                 |
| N0524     | Localised, secondary osteoarthritis of the hand                    | 1                 |
| N0523     | Localised, secondary osteoarthritis of the forearm                 | 1                 |
| N0527     | Localised, secondary osteoarthritis of the ankle and foot          | 1                 |
| N051E     | Localised, primary osteoarthritis of toe                           | 1                 |
| N0512     | Localised, primary osteoarthritis of the upper arm                 | 1                 |
| N0515     | Localised, primary osteoarthritis of the pelvic region and thigh   | 1                 |
| N0513     | Localised, primary osteoarthritis of the forearm                   | 1                 |
| N0517     | Localised, primary osteoarthritis of the ankle and foot            | 1                 |
| N051F     | Localised, primary osteoarthritis of elbow                         | 1                 |
| N052z     | Localised secondary OA NOS                                         | 1                 |
| N051z     | Localised primary OA NOS                                           | 1                 |
| N0532     | Localised osteoarthritis, unspecified, of the upper arm            | 1                 |
| N0537     | Localised osteoarthritis, unspecified, of the ankle and foot       | 1                 |
| N053z     | Localised OA unspecified NOS                                       | 1                 |
| N053      | Localised OA unspecified                                           | 1                 |
| N052      | Local.secondary osteoarthritis                                     | 1                 |
| N0520     | Local.secondary OA-site unsp.                                      | 1                 |
| N0521     | Local.secondary OA-shoulder                                        | 1                 |
| N0528     | Local.secondary OA-other spec.                                     | 1                 |
| N051      | Local.primary osteoarthritis                                       | 1                 |
| N0510     | Local.primary OA-site unsp.                                        | 1                 |
| N0511     | Local.primary OA-shoulder regn                                     | 1                 |
| N0518     | Local.primary OA-other specif                                      | 1                 |
| N0516     | Local.primary OA-lower leg                                         | 1                 |
| N0514     | Local.primary OA-hand                                              | 1                 |

| Read code | Description                        | Number of studies |
|-----------|------------------------------------|-------------------|
| N0530     | Local.OA unsp.-site unspecif.      | 1                 |
| N0531     | Local.OA unsp.-shoulder region     | 1                 |
| N0538     | Local.OA unsp.-other specified     | 1                 |
| N0534     | Local.OA unsp.-hand                | 1                 |
| N0533     | Local.OA unsp.-forearm             | 1                 |
| N051D     | Local prim osteoarth wrist         | 1                 |
| N3308     | Local osteoporosis - Lequesne      | 1                 |
| S5z       | Ligament sprain NOS                | 1                 |
| N0001     | Libman-Sacks disease               | 1                 |
| N245-6    | Leg pain                           | 1                 |
| N234      | Laxity of ligament                 | 1                 |
| SJ43      | Latri cutaneous branch T12 inj     | 1                 |
| N071      | Lateral meniscus derangement       | 1                 |
| N0714     | Lateral meniscus derangem.NOS      | 1                 |
| N0713     | Lateral menisc.post.horn deran     | 1                 |
| N0710     | Lateral menisc.derang.unspecif     | 1                 |
| N0712     | Lateral menisc.ant.horn derang     | 1                 |
| N2132     | Lateral epicondylitis of the elbow | 1                 |
| MHTBALA9  | Lateral Patella Release            | 1                 |
| SC08      | Late effect-tendon injury          | 1                 |
| SC05      | Late effect-mult./other #bones     | 1                 |
| SC06      | Late effect-dislocation            | 1                 |
| SC01      | Late effect-#spine-no cord les     | 1                 |
| SC011     | Late effect # thoracic vert        | 1                 |
| SC012     | Late effect # lumbar vertebra      | 1                 |
| SC010     | Late effect # cervic vertebra      | 1                 |
| EGTON119  | Laceration Nos                     | 1                 |
| N3744     | Kyphosis in skeletal dysplasia     | 1                 |
| N3713     | Kyphosis due to oth treatment      | 1                 |
| N3741     | Kyphosis + other condition         | 1                 |
| N373z     | Kyphoscoliosis or scoliosis NOS    | 1                 |
| N373      | Kyphoscoliosis and scoliosis       | 1                 |
| N3241     | Kohler's dis.(prim.patell.ctr)     | 1                 |
| N0956     | Knee stiff                         | 1                 |
| S54y      | Knee sprain NOS                    | 1                 |
| S54       | Knee sprain                        | 1                 |
| N0106     | Knee pyogenic arthritis            | 1                 |
| N0826     | Knee pathological dislocation      | 1                 |
| 1M10      | Knee pain                          | 1                 |
| N05z6     | Knee osteoarthritis NOS            | 1                 |
| N05z6-1   | Knee osteoarthritis NOS            | 1                 |
| N0946-1   | Knee joint pain                    | 1                 |
| N0946     | Knee joint pain                    | 1                 |
| N0846     | Knee joint contracture             | 1                 |
| N0856     | Knee joint ankylosis               | 1                 |
| N0966     | Knee gives way                     | 1                 |
| N216z     | Knee enthesopathy NOS              | 1                 |
| N06z6-1   | Knee arthritis NOS                 | 1                 |
| N06z6     | Knee arthritis NOS                 | 1                 |
| ASDFGKN2  | Knee Pain?                         | 1                 |
| ASDFGKN6  | Knee Pain Does Not Affect Sleep    | 1                 |
| ASDFGKN4  | Knee Pain Affects Sleep?           | 1                 |
| ASDFGKN5  | Knee Pain Affects Sleep            | 1                 |

| Read code | Description                    | Number of studies |
|-----------|--------------------------------|-------------------|
| ASDFGKN3  | Knee Pain                      | 1                 |
| MUNNUKN1  | Knee Pain                      | 1                 |
| MAWBYKN1  | Knee Pain                      | 1                 |
| N0836     | Knee - recurrent dislocation   | 1                 |
| N13y1     | Klippel's disease              | 1                 |
| N116      | Kissing spine                  | 1                 |
| N002      | Keratoconjunctivitis sicca     | 1                 |
| N0600     | Kaschin-Beck dis.-site unspec. | 1                 |
| N0601     | Kaschin-Beck dis.-shoulder     | 1                 |
| N0608     | Kaschin-Beck dis.-other specif | 1                 |
| N0609     | Kaschin-Beck dis.-multipl.site | 1                 |
| N060z     | Kaschin-Beck dis.-NOS          | 1                 |
| N060      | Kaschin - Beck disease         | 1                 |
| N320z     | Juvenile spine osteochondr.NOS | 1                 |
| N3200     | Juvenile spine osteochond.unsp | 1                 |
| N0455     | Juvenile rheumatoid arthritis  | 1                 |
| N0430     | Juvenile rheumatoid arthr.unsp | 1                 |
| N043z     | Juvenile rheumatoid arthr.NOS  | 1                 |
| N3263     | Juvenile osteochondrosis NOS   | 1                 |
| N326z     | Juvenile osteochondroses NOS   | 1                 |
| N3262     | Juvenile osteochondritis NOS   | 1                 |
| N3261     | Juvenile epiphysitis NOS       | 1                 |
| N0030     | Juvenile dermatomyositis       | 1                 |
| N3260     | Juvenile apophysitis NOS       | 1                 |
| N043      | Juvenile R.A.- Still's disease | 1                 |
| OX7120DA  | Juvenile Arthritis /ox         | 1                 |
| N3243     | Juv.osteoch.secondary.pat.ctre | 1                 |
| N0451     | Juv seronegative polyarthritis | 1                 |
| N328      | Juv osteochondrosis of spine   | 1                 |
| N0452     | Juv arthritis in psoriasis     | 1                 |
| N0453     | Juv arthritis in Crohn's dis   | 1                 |
| N0454     | Juv arth in ulcerative colitis | 1                 |
| N0900     | Joint effusion-site unspecif.  | 1                 |
| N0901     | Joint effusion-shoulder region | 1                 |
| N0908     | Joint effusion-other specif.   | 1                 |
| N09z1     | Joint disord.NOS-shoulder      | 1                 |
| N08z      | Joint derangement NOS          | 1                 |
| N08zz     | Joint derangement NOS          | 1                 |
| N08z0     | Joint derange.NOS-site unspec. | 1                 |
| N08z1     | Joint derange.NOS-shoulder     | 1                 |
| N08z7     | Joint derange.NOS-other spec.  | 1                 |
| N08z8     | Joint derange.NOS-multipl.site | 1                 |
| N05z.11   | Joint degeneration             | 1                 |
| N05z      | Joint degeneration             | 1                 |
| N0840     | Joint contracture-site unspec  | 1                 |
| N0841     | Joint contracture-shoulder     | 1                 |
| N0848     | Joint contracture-other specif | 1                 |
| N0850     | Joint ankylosis-site unspecif. | 1                 |
| N0851     | Joint ankylosis-shoulder       | 1                 |
| N0858     | Joint ankylosis-other specif.  | 1                 |
| ASDFGJO2  | Joint Symptoms                 | 1                 |
| ASDFGJO3  | Joint Pain                     | 1                 |
| N3841     | Isthmic spondylolisthesis      | 1                 |

| Read code | Description                       | Number of studies |
|-----------|-----------------------------------|-------------------|
| S531      | Ischiocapsular sprain             | 1                 |
| N23yB     | Ischaemic infarction of muscle    | 1                 |
| N123-1    | Intervertebral disc prol. NOS     | 1                 |
| N12z      | Intervertebral disc lesion NOS    | 1                 |
| OX7259AP  | Intervertebral Disc Prolapsed /ox | 1                 |
| N3y05     | Intervert disc sten neur canal    | 1                 |
| N23y0     | Interstitial myositis             | 1                 |
| N07z      | Internal knee derangement NOS     | 1                 |
| N07       | Internal derangement of knee      | 1                 |
| N1350     | Intermittent torticollis          | 1                 |
| N090W     | Intermittent hydrarthrosis        | 1                 |
| N084E     | Int rotat contracture-shoulder    | 1                 |
| N08y      | Instability of joint              | 1                 |
| SJ7z      | Injury to other nerve NOS         | 1                 |
| SKz       | Injury NOS                        | 1                 |
| OX9967C   | Injury Knee /ox                   | 1                 |
| SJ9       | Injur/nerv+spinal crd/thorx lev   | 1                 |
| SJB       | Inj/nerves/should+upp arm lev     | 1                 |
| S46C      | Inj/multipl structures of knee    | 1                 |
| S5Q6      | Inj tendon rotator cuff should    | 1                 |
| N2166     | Infrapatellar bursitis            | 1                 |
| N10       | Inflammatory spondylopathies      | 1                 |
| N04       | Inflammatory polyarthropathy      | 1                 |
| N04*      | Inflammatory arthropathy          | 1                 |
| N10y0     | Inflamm.spondylop.in dis. EC      | 1                 |
| N04z      | Inflamm.polyarthropathy NOS       | 1                 |
| S4103     | Inferior dislocation shoulder     | 1                 |
| N2302     | Infective myositis-shoulder       | 1                 |
| N2300     | Infective myositis-neck           | 1                 |
| N2301     | Infective myositis-back           | 1                 |
| N01z      | Infective arthritis NOS           | 1                 |
| N01zz     | Infective arthritis NOS           | 1                 |
| N302B     | Infection of thoracic spine       | 1                 |
| N302G     | Infection of scapula              | 1                 |
| N302R     | Infection of patella              | 1                 |
| N302Z     | Infection of multiple bones       | 1                 |
| N302C     | Infection of lumbar spine         | 1                 |
| N302F     | Infection of clavicle             | 1                 |
| N302A     | Infection of cervical spine       | 1                 |
| N01z0     | Infect.arthr.NOS-site unspecif    | 1                 |
| N01z1     | Infect.arthr.NOS-shoulder reg     | 1                 |
| N01zy     | Infect.arthr.NOS-other specifi    | 1                 |
| N01zx     | Infect.arthr.NOS-multiple site    | 1                 |
| N12zG     | Infect intervert disc - pyogen    | 1                 |
| N01z8     | Infec arthritis NOS-shoulder      | 1                 |
| N01zK     | Infec arthritis NOS-knee          | 1                 |
| N01z9     | Infec arthr NOS-sternoclav jt     | 1                 |
| N01zA     | Infec arth NOS-acromioclav jt     | 1                 |
| N23y5     | Inappropriate firing of muscle    | 1                 |
| N2124     | Impingement syndr of shoulder     | 1                 |
| N2331     | Immobility syndrome               | 1                 |
| N2159     | Iliotibial band syndrome          | 1                 |
| N1403     | Idiopathic th spinal stenosis     | 1                 |

| Read code | Description                       | Number of studies |
|-----------|-----------------------------------|-------------------|
| N3730     | Idiopathic scoliosis              | 1                 |
| N3303     | Idiopathic osteoporosis           | 1                 |
| N1407     | Idiopathic lu spinal stenosis     | 1                 |
| N3731     | Idiopathic kyphoscoliosis         | 1                 |
| N33z7     | Idiopathic hypertrophy of bone    | 1                 |
| N1300     | Idiopathic Cx spinal stenosis     | 1                 |
| N3316     | Idiopath osteopor + path fract    | 1                 |
| N3348     | Idiopath aseptic necrosis of bone | 1                 |
| N1405     | iatrogenic th spinal stenosis     | 1                 |
| N1409     | iatrogenic lu spinal stenosis     | 1                 |
| N1302     | iatrogenic Cx spinal stenosis     | 1                 |
| C04*      | Hypothyroidism                    | 1                 |
| N2431     | Hypertrophy of knee fat pad       | 1                 |
| N33z4     | Hypertrophy of bone               | 1                 |
| N3382     | Hypertrophic non-union of #       | 1                 |
| N312      | Hypertroph.pulm.osteoarthrop.     | 1                 |
| N02y8     | Hydroxyapatite deposition dis     | 1                 |
| N2225     | Housemaids knee                   | 1                 |
| N0707     | Horiz cleavage tear-med menisc    | 1                 |
| N0718     | Horiz cleavage tear-lat menisc    | 1                 |
| N094K-2   | Hip pain                          | 1                 |
| N05z5     | Hip osteoarthritis NOS            | 1                 |
| N05z5-1   | Hip osteoarthritis NOS            | 1                 |
| N0535     | Hip osteoarthritis NOS            | 1                 |
| N0535-2   | Hip osteoarthritis NOS            | 1                 |
| N06z5     | Hip arthritis NOS                 | 1                 |
| N0809     | Hill-Sachs lesion                 | 1                 |
| N245-5    | Heel pain                         | 1                 |
| N0507     | Heberden's nodes with arthropathy | 1                 |
| N245-4    | Hand pain                         | 1                 |
| N2450     | Hand pain                         | 1                 |
| N0944-1   | Hand joint pain                   | 1                 |
| N06z4-1   | Hand arthritis NOS                | 1                 |
| N068      | Haemophilic arthropathy           | 1                 |
| N091B     | Haemarthrosis-sternoclav joint    | 1                 |
| N0910     | Haemarthrosis-site unspecified    | 1                 |
| N0911     | Haemarthrosis-shoulder            | 1                 |
| N0918     | Haemarthrosis-other specified     | 1                 |
| N0919     | Haemarthrosis-multiple joints     | 1                 |
| N091C     | Haemarthrosis-acromioclav jt      | 1                 |
| N0916     | Haemarthrosis of the knee         | 1                 |
| N091A     | Haemarthrosis of shoulder         | 1                 |
| N091M     | Haemarthrosis of knee             | 1                 |
| N091z     | Haemarthrosis NOS                 | 1                 |
| N091      | Haemarthrosis                     | 1                 |
| N083M     | Habitual sublux shoulder          | 1                 |
| N083L     | Habitual disloc shoulder          | 1                 |
| N083r     | Habitual disloc - patella         | 1                 |
| 14G8      | H/O: vertebral fracture           | 1                 |
| 14G1      | H/O: rheumatoid arthritis         | 1                 |
| 14G2      | H/O: osteoarthritis               | 1                 |
| 14GZ      | H/O: musculo-skeletal dis. NOS    | 1                 |
| 14G3      | H/O: knee problem                 | 1                 |

| Read code  | Description                     | Number of studies |
|------------|---------------------------------|-------------------|
| 14J        | H/O: injury                     | 1                 |
| 14G4       | H/O: back problem               | 1                 |
| 14T5       | H/O: artificial joint           | 1                 |
| 14V5       | H/O: arthrodesis                | 1                 |
| 14G        | H/O: arthritis                  | 1                 |
| 14N30      | H/O Spinal surgery              | 1                 |
| 16Z2       | Growing pains                   | 1                 |
| S3z00      | Greenstick fracture             | 1                 |
| N0230      | Gouty arthritis-site unspecif.  | 1                 |
| N0231      | Gouty arthritis-shoulder        | 1                 |
| N023y      | Gouty arthritis-other specif.   | 1                 |
| N023x      | Gouty arthritis-multiple sites  | 1                 |
| N023z      | Gouty arthritis NOS             | 1                 |
| N023       | Gouty arthritis                 | 1                 |
| N2131-1    | Golfer's elbow                  | 1                 |
| N200       | Gnt cell arter+polymyalg rheum  | 1                 |
| EGTON444   | Gluteal Muscle Injury           | 1                 |
| N0873      | Glenoid labrum tear             | 1                 |
| N0872      | Glenoid labrum detachment       | 1                 |
| N365       | Genu recurvatum - acquired      | 1                 |
| N050z      | Generalised osteoarthritis NOS  | 1                 |
| N050z00    | Generalised osteoarthritis NOS  | 1                 |
| N050       | Generalised osteoarthritis - OA | 1                 |
| N050.0     | Generalised osteoarthritis - OA | 1                 |
| N065A      | Generalised arthritis           | 1                 |
| N065A00    | Generalised arthritis           | 1                 |
| N05000     | Generalised OA-site unspecif.   | 1                 |
| N0500      | Generalised OA-site unspecif.   | 1                 |
| N050200    | Generalised OA-multiple sites   | 1                 |
| N0502      | Generalised OA-multiple sites   | 1                 |
| N0501      | Generalised OA-hand             | 1                 |
| N224z      | Ganglion/synovial cyst NOS      | 1                 |
| N224       | Ganglion/synov.cyst - knee      | 1                 |
| N224-92    | Ganglion/synov.cyst - knee      | 1                 |
| N2243      | Ganglion unspecified            | 1                 |
| N2245      | Ganglion of wrist               | 1                 |
| N2242      | Ganglion of tendon sheath       | 1                 |
| N2246      | Ganglion of knee                | 1                 |
| N2241      | Ganglion of joint               | 1                 |
| N224C      | Ganglion of foot                | 1                 |
| EMISR4QFU2 | Fusion Of Lumbar Spine          | 1                 |
| EMISR4QFU1 | Fusion Of Cervical Spine        | 1                 |
| N2115      | Full thickn rotator cuff tear   | 1                 |
| N210-2     | Frozen shoulder                 | 1                 |
| N331N      | Fragility fracture              | 1                 |
| N331M      | Fragility # unsp osteoporosis   | 1                 |
| S10B       | Fracture/lumbar spine+pelvis    | 1                 |
| S10A1      | Fracture/2nd cervical vertebra  | 1                 |
| S10A0      | Fracture/1st cervical vertebra  | 1                 |
| S15        | Fracture of thoracic vertebra   | 1                 |
| S1z        | Fracture of neck and trunk NOS  | 1                 |
| S1         | Fracture of neck and trunk      | 1                 |
| S10A       | Fracture of neck                | 1                 |

| Read code | Description                       | Number of studies |
|-----------|-----------------------------------|-------------------|
| S10B0     | Fracture of lumbar vertebra       | 1                 |
| N338z     | Fracture malunion or nonunion NOS | 1                 |
| SR1       | Fracture involv multi body reg    | 1                 |
| SR10      | Fracture involv head with neck    | 1                 |
| S4        | Fracture dislocation/subluxat     | 1                 |
| OX8056    | Fracture Spine /ox                | 1                 |
| S3z       | Fracture NOS                      | 1                 |
| OXL8056LV | Fracture Lumbar Vertebra /ox      | 1                 |
| SR16      | Fract/thorx wth lw bck+plv+lmb    | 1                 |
| N3317     | Fract of bone in neoplast dis     | 1                 |
| N2451     | Foot pain                         | 1                 |
| N245-3    | Foot pain                         | 1                 |
| 1M11      | Foot pain                         | 1                 |
| N220B     | Flexor tenosynovitis of finger    | 1                 |
| N3660     | Flexion deformity of knee         | 1                 |
| N369      | Flexion deformity                 | 1                 |
| N084A     | Flexion contracture-shoulder      | 1                 |
| N084a     | Flexion contracture-knee          | 1                 |
| N374E     | Flatback syndrome                 | 1                 |
| N040T     | Flare of rheumatoid arthritis     | 1                 |
| N08yA     | Flail joint                       | 1                 |
| N09C      | Fistula of joint                  | 1                 |
| N2450-2   | Finger pain                       | 1                 |
| N05z4-1   | Finger osteoarthritis NOS         | 1                 |
| N2163     | Fibular collat.lig.bursitis       | 1                 |
| N3324     | Fibrous cortical defect           | 1                 |
| N2405     | Fibrositis of neck                | 1                 |
| N00y1     | Fibrosclerosis systemic           | 1                 |
| N087      | Fibrocartilage lesion of joint    | 1                 |
| MHTBAFH1  | Fh: Osteoporosis                  | 1                 |
| N041      | Felty's syndrome                  | 1                 |
| N1y1      | Fatigue fracture of vertebra      | 1                 |
| N244      | Fasciitis unspecified             | 1                 |
| N024      | Familial chondrocalcinosis        | 1                 |
| N14y      | Facet joint syndrome              | 1                 |
| 1211      | FH: Rheumatoid arthritis          | 1                 |
| 1268      | FH: Osteoporosis                  | 1                 |
| 1212      | FH: Osteoarthritis                | 1                 |
| 121Z      | FH: Musculo-skeletal dis. NOS     | 1                 |
| 121       | FH: Arthritis                     | 1                 |
| N220D     | Extensor tenosynovitis of wrist   | 1                 |
| N220F     | Extensor tenosynovitis of thumb   | 1                 |
| N220E     | Extensor tenosynovitis of finger  | 1                 |
| N084B     | Extension contracture-shoulder    | 1                 |
| N084F     | Ext rotat contracture-shoulder    | 1                 |
| N21z7     | Exostosis                         | 1                 |
| 16C8      | Exacerbation of backache          | 1                 |
| N0506     | Erosive osteoarthrosis            | 1                 |
| N32z1     | Epiphysitis NOS                   | 1                 |
| N33z1     | Epiphyseal arrest                 | 1                 |
| N00y0     | Eosinophilic fasciitis            | 1                 |
| N216      | Enthesopathy of knee              | 1                 |
| N21z      | Enthesopathy NOS                  | 1                 |

| Read code | Description                        | Number of studies |
|-----------|------------------------------------|-------------------|
| N11y1     | Enterobacterial spondylitis        | 1                 |
| 1M00-1    | Elbow pain                         | 1                 |
| 1M00      | Elbow pain                         | 1                 |
| N05z2     | Elbow osteoarthritis NOS           | 1                 |
| N06z2     | Elbow arthritis NOS                | 1                 |
| N090B     | Effusion of sternoclav joint       | 1                 |
| N090A     | Effusion of shoulder               | 1                 |
| N0909     | Effusion of multiple joints        | 1                 |
| N090M     | Effusion of knee                   | 1                 |
| N090z     | Effusion of joint NOS              | 1                 |
| N090      | Effusion of joint                  | 1                 |
| N090C     | Effusion of acromioclav joint      | 1                 |
| N0906     | Effusion - knee joint              | 1                 |
| N0906-99  | Effusion - knee joint              | 1                 |
| N3840     | Dysplastic spondylolisthesis       | 1                 |
| N2361     | Dupuyt dis-palm + nod no cont      | 1                 |
| N3305     | Drug-induced osteoporosis          | 1                 |
| N0002     | Drug-ind systemic lupus eryth      | 1                 |
| N3315     | Drug-ind osteopor + path fract     | 1                 |
| N235      | Double-jointed (hypermobility)     | 1                 |
| N1123     | Dorsal spondylo w/o myelopath      | 1                 |
| N3370     | Disuse atrophy of bone             | 1                 |
| N3304     | Dissuse osteoporosis               | 1                 |
| N0000     | Disseminated lupus erythemat.      | 1                 |
| N09AX     | Disorder of patella unspecified    | 1                 |
| N33zG     | Disorder of cartilage, unspec      | 1                 |
| N33zF     | Disorder of bone unspecified       | 1                 |
| S46       | Dislocation or subluxation of knee | 1                 |
| S4z       | Dislocation or subluxation NOS     | 1                 |
| S41z      | Dislocation of shoulder NOS        | 1                 |
| S46z      | Dislocation of knee NOS            | 1                 |
| S41       | Dislocated shoulder                | 1                 |
| S463-99   | Dislocated patella                 | 1                 |
| SR20      | Disloc,sprns+strns inv hd+neck     | 1                 |
| SR2       | Dislc,sprns+strns/mult bdy reg     | 1                 |
| N071B     | Discoid lateral meniscus           | 1                 |
| N123      | Disc unsp.displ.-no myelopathy     | 1                 |
| N12B      | Disc prolapse with myelopathy      | 1                 |
| N12C      | Disc prolapse + radiculopathy      | 1                 |
| N12zz     | Disc disorders NOS                 | 1                 |
| N129z     | Disc disorder+myelopathy NOS       | 1                 |
| N00       | Diffuse connective tissue dis.     | 1                 |
| N097z     | Difficulty in walking NOS          | 1                 |
| N097      | Difficulty in walking              | 1                 |
| N23yA     | Diastasis of muscle                | 1                 |
| N33z3     | Diaphysitis                        | 1                 |
| N0300     | Diabetic cheiroarthropathy         | 1                 |
| N0301     | Diabetic Charcot arthropathy       | 1                 |
| N003X     | Dermatopolymyositis, unspec        | 1                 |
| N0031     | Dermatopolymyosit,neoplast dis     | 1                 |
| N003      | Dermatomyositis                    | 1                 |
| SC0z      | Delayed union of fracture          | 1                 |
| N3386     | Delayed union of fracture          | 1                 |



| Read code | Description                     | Number of studies |
|-----------|---------------------------------|-------------------|
| S9030     | Degloving injury,shoulder area  | 1                 |
| SA130     | Degloving injury knee           | 1                 |
| N3842     | Degenerative spondylolisthesis  | 1                 |
| N128      | Degenerative disc disease NOS   | 1                 |
| N1404     | Degenerativ th spinal stenosis  | 1                 |
| N1408     | Degenerativ lu spinal stenosis  | 1                 |
| N1301     | Degenerativ Cx spinal stenosis  | 1                 |
| N114      | Degeneration of lumbar spine    | 1                 |
| N114-1    | Degeneration of lumbar spine    | 1                 |
| N0721     | Degen lesion artic cart knee    | 1                 |
| N36y4     | Deformity of scapula            | 1                 |
| N36yD     | Deformity of patella            | 1                 |
| N36y3     | Deformity of clavicle           | 1                 |
| N36y2     | Deformity of bone               | 1                 |
| N224D     | Cyst of tendon sheath           | 1                 |
| N0722     | Cyst of semilunar cartilage     | 1                 |
| N0709     | Cyst of medial meniscus         | 1                 |
| N071A     | Cyst of lateral meniscus        | 1                 |
| N2244     | Cyst of bursa                   | 1                 |
| N332z     | Cyst of bone NOS                | 1                 |
| N332      | Cyst of bone                    | 1                 |
| N11A      | Cx spondyl + vasc compression   | 1                 |
| N1303     | Cx spin stenosis due to oth dis | 1                 |
| N12C0     | Cx disc prolapse+radiculopathy  | 1                 |
| N12B0     | Cx disc prolapse + myelopathy   | 1                 |
| N3740     | Curvature of spine unspecified  | 1                 |
| N37zz     | Curvature of spine NOS          | 1                 |
| N37z      | Curvature of spine NOS          | 1                 |
| N37       | Curvature of spine              | 1                 |
| N02zK     | Crystal arthropathy NOS-knee    | 1                 |
| N02zz     | Crystal arthropathy NOS         | 1                 |
| N02z      | Crystal arthropathy NOS         | 1                 |
| N02z0     | Crystal arthr.NOS-site unspec.  | 1                 |
| N02z1     | Crystal arthr.NOS-shoulder      | 1                 |
| N02zy     | Crystal arthr.NOS-other spec.   | 1                 |
| N02zx     | Crystal arthr.NOS-multipl.site  | 1                 |
| N02z9     | Cryst arthr NOS-sternoclav jt   | 1                 |
| N02zA     | Cryst arthr NOS-acromioclav jt  | 1                 |
| N02z8     | Crys arthr NOS-shoulder         | 1                 |
| SF20z     | Crushinjuryshlder+uparmNOS      | 1                 |
| SFz       | Crushing injury NOS             | 1                 |
| SF        | Crushing injury                 | 1                 |
| SF40      | Crush injury multiple sites NEC | 1                 |
| SF021     | Crush injury larynx             | 1                 |
| SF311     | Crush injury knee               | 1                 |
| SF110     | Crush injury back               | 1                 |
| SF4z      | Crush injury                    | 1                 |
| N13y2     | Crick in neck                   | 1                 |
| N2472     | Cramp                           | 1                 |
| N051A     | Coxarthr from dysplasia, bilat  | 1                 |
| N3216     | Coxa plana                      | 1                 |
| 182B0     | Costal margin chest pain        | 1                 |
| N2123     | Coracoid impingement            | 1                 |

| Read code | Description                          | Number of studies |
|-----------|--------------------------------------|-------------------|
| S502      | Coracohumeral sprain                 | 1                 |
| SE30z     | Contusionshlder+uer arm NOS          | 1                 |
| SE44      | Contusionlwr limbmlti sites          | 1                 |
| SE00      | Contusion, forehead                  | 1                 |
| SEz       | Contusion with skin intact NOS       | 1                 |
| SE30      | Contusion shoulder or upper arm      | 1                 |
| SE300     | Contusion shoulder area              | 1                 |
| SE301     | Contusion scapular area              | 1                 |
| SE231     | Contusion of lower back              | 1                 |
| SE232     | Contusion of lower back              | 1                 |
| SE4y      | Contusion multiple sites NEC         | 1                 |
| SE41z     | Contusion knee and lower leg NOS     | 1                 |
| SE411     | Contusion knee                       | 1                 |
| SE0z      | Contusion face scalp+neck NOS        | 1                 |
| SE304     | Contusion clavicular area            | 1                 |
| SE23z     | Contusion back NOS                   | 1                 |
| SE        | Contusion (bruise) with intact skin  | 1                 |
| N22y0     | Contracture of tendon sheath         | 1                 |
| N23yC     | Contracture of muscle                | 1                 |
| N0849     | Contracture of multiple joints       | 1                 |
| N084z     | Contracture of joint NOS             | 1                 |
| N084      | Contracture of joint                 | 1                 |
| N         | Connective tissue diseases           | 1                 |
| N3y04     | Connect tiss sten neural canal       | 1                 |
| PE1       | Congenital sternomastoid torticollis | 1                 |
| N3y07     | Con tis/disc sten intervrt for       | 1                 |
| N33C      | Complex regionl pain syndrom I       | 1                 |
| S5C       | Complete tear, knee ligament         | 1                 |
| S58z      | Complete tear shoulder joint NOS     | 1                 |
| S58       | Complete tear shoulder joint         | 1                 |
| N33z8     | Complete epiphyseal arrest           | 1                 |
| N33z6     | Compensatory hypertrophy-bone        | 1                 |
| SK0y      | Compartmentsyndrome                  | 1                 |
| S5A0D     | Comp tr shrt intr lig non-sp         | 1                 |
| N331D     | Collapsed vertebra NOS               | 1                 |
| N331      | Collapse of vertebra NOS             | 1                 |
| N331F     | Collapse of thoracic vertebra        | 1                 |
| N3310     | Collapse of thoracic vertebra        | 1                 |
| N3311     | Collapse of lumbar vertebra          | 1                 |
| N331G     | Collapse of lumbar vertebra          | 1                 |
| N331E     | Collapse of cervical vertebra        | 1                 |
| N331L     | Collap vert due osteopor NOS         | 1                 |
| N331J     | Collap lumb vert due to osteo        | 1                 |
| N331H     | Collap cerv vert due to osteop       | 1                 |
| N00z      | Collagen disease NOS                 | 1                 |
| N331K     | Coll thorac vert due osteopor        | 1                 |
| N147z     | Coccyx disorder NOS                  | 1                 |
| N1472     | Coccygodynia                         | 1                 |
| S5E1      | Cmplt tr,thyroid region lgmt         | 1                 |
| S5E30     | Cmplt tr,sternoclavicular lgmt       | 1                 |
| S5Ez      | Cmplt tr,other lgmt NOS              | 1                 |
| S5Cy      | Cmplt tr,other knee lgmt             | 1                 |
| S5C1      | Cmplt tr,knee,mdl collat lgmt        | 1                 |

| Read code | Description                    | Number of studies |
|-----------|--------------------------------|-------------------|
| S5C0      | Cmplt tr,knee,lat collat lgmt  | 1                 |
| S5Cz      | Cmplt tr,knee lgmt NOS         | 1                 |
| S581      | Cmplt tr,coraco-clav lgmt      | 1                 |
| S580      | Cmplt tr,acromio-clav lgmt     | 1                 |
| S5A0A     | Cmplt tr triang fibrocartilage | 1                 |
| S5C3      | Cmpl tr,knee,ant cruciate lgmt | 1                 |
| S5y57     | Cmpl tear,lumbosacral lgmt     | 1                 |
| S5y56     | Cmpl tear,iliolumbar lgmt      | 1                 |
| S5C2      | Cmp tr,knee,post cruciate lgmt | 1                 |
| S2920     | Clsd mult fract clav scap hum  | 1                 |
| S1000     | Clsd # unsp cerv vertebra      | 1                 |
| S1024     | Clsd # thorc vert-trnsvrs prcs | 1                 |
| S1026     | Clsd # thorc vert - tricolumnr | 1                 |
| S1025     | Clsd # thorc vert - post prcs  | 1                 |
| S1020     | Clsd # thoracic vert, burst    | 1                 |
| S1021     | Clsd # thoracic vert wedge     | 1                 |
| S102z     | Clsd # thorac vert NOS         | 1                 |
| S1023     | Clsd # thor vert-spinous prcss | 1                 |
| S1003     | Clsd # third cerv vertebra     | 1                 |
| S2102     | Clsd # scapula, coracoid       | 1                 |
| S1041     | Clsd # lumbar vert wedge       | 1                 |
| S1040     | Clsd # lumbar vert burst       | 1                 |
| S1046     | Clsd # lumb vert - tricolumnar | 1                 |
| S1004     | Clsd # fourth cerv vertebra    | 1                 |
| S1005     | Clsd # fifth cerv vertebra     | 1                 |
| S2001     | Clsd # clavicle medial end     | 1                 |
| S2003     | Clsd # clavical lateral end    | 1                 |
| S100H     | Clsd # cerv vert, wedge        | 1                 |
| S100G     | Clsd # cerv vert, burst        | 1                 |
| S100z     | Clsd # cerv spine NOS          | 1                 |
| S100F     | Clsd # axis, tricolumnar       | 1                 |
| S100D     | Clsd # axis, transvrse process | 1                 |
| S100B     | Clsd # axis, spondylolysis     | 1                 |
| S100C     | Clsd # axis, spinous process   | 1                 |
| S100E     | Clsd # axis, posterior arch    | 1                 |
| S100A     | Clsd # axis odontoid process   | 1                 |
| S1009     | Clsd # atlas, comminuted       | 1                 |
| S1106     | Clsd # C5-C7 unspec cord les   | 1                 |
| S110A     | Clsd # C5-C7 post cord lesion  | 1                 |
| S110B     | Clsd # C5-C7 incomp cord les   | 1                 |
| S1107     | Clsd # C5-C7 complete cord les | 1                 |
| S1109     | Clsd # C5-C7 cent cord lesion  | 1                 |
| S1108     | Clsd # C5-C7 ant cord lesion   | 1                 |
| S1100     | Clsd # C1-C4 unspec cord les   | 1                 |
| S1104     | Clsd # C1-C4 post cord lesion  | 1                 |
| S1105     | Clsd # C1-C4 incomp cord les   | 1                 |
| S1101     | Clsd # C1-C4 complete cord les | 1                 |
| S1103     | Clsd # C1-C4 cent cord lesion  | 1                 |
| S1102     | Clsd # C1-C4 ant cord lesion   | 1                 |
| S4120     | Cls trmtc subluxatn shldr jnt  | 1                 |
| S4696     | Cls trmtc sublux,head fibula   | 1                 |
| S467      | Cls trmtc sublux pat-fem jt    | 1                 |
| S4690     | Cls trmtc sublux knee jt,unsp  | 1                 |

| Read code | Description                    | Number of studies |
|-----------|--------------------------------|-------------------|
| S4692     | Cls trmtc sublux knee jt,post  | 1                 |
| S4694     | Cls trmtc sublux knee jt,ltrl  | 1                 |
| S4691     | Cls trmtc sublux knee jt,ant   | 1                 |
| S469      | Cls trmtc sublux knee jt       | 1                 |
| S4102     | Cls trmtc dslctn shldr jtpost  | 1                 |
| S410z     | Cls trmtc dislctn shoulder NOS | 1                 |
| S49E4     | Cls trm sublux,st-clav jt,post | 1                 |
| S49E3     | Cls trm sublux,st-clav jt,ant  | 1                 |
| S49E2     | Cls trm sublux st-clav jt      | 1                 |
| S4671     | Cls trm sublux pat-fem jt,med  | 1                 |
| S4670     | Cls trm sublux pat-fem jt,ltrl | 1                 |
| S49E5     | Cls trm sublux laryngl cart    | 1                 |
| S4695     | Cls trm sublux knee jt,rotatry | 1                 |
| S4693     | Cls trm sublux knee jt,medial  | 1                 |
| S4121     | Cls trm sublux acromio-clav jt | 1                 |
| S4656     | Cls trm dslctn, head fibula    | 1                 |
| S4631     | Cls trm dslctn pat-fem jt,med  | 1                 |
| S4630     | Cls trm dslctn pat-fem jt,lat  | 1                 |
| S4650     | Cls trm dslctn knee, unspc     | 1                 |
| S4654     | Cls trm dslctn knee jt,lateral | 1                 |
| S4652     | Cls trm dslctn knee jt, post   | 1                 |
| S4653     | Cls trm dslctn knee jt, medial | 1                 |
| S4651     | Cls trm dslctn knee jt, ant    | 1                 |
| S465z     | Cls trm dslctn knee NOS        | 1                 |
| S4655     | Cls trm dslct knee jt,rotatory | 1                 |
| S4963     | Cls trm dslc,stern-clav jt,ant | 1                 |
| S4962     | Cls trm dslc sterno-clav jt    | 1                 |
| S4965     | Cls trm dslc laryngl cartilage | 1                 |
| S4964     | Cls trm dsl,stern-clav jt,post | 1                 |
| S412      | Cls traumtc subluxatn shoulder | 1                 |
| S410      | Cls traumtc disloctn shoulder  | 1                 |
| S4105     | Cls traumatic disloctn scapula | 1                 |
| S49A      | Cls sublux thrcic+lumbar spine | 1                 |
| S49A1     | Cls sublux thrcic spine        | 1                 |
| S49Az     | Cls sublux thrc+lmb spine NOS  | 1                 |
| S498x     | Cls sublux mlti cerv vertebrae | 1                 |
| S4980     | Cls sublux cervical spine,unsp | 1                 |
| S498      | Cls sublux cervical spine      | 1                 |
| S498z     | Cls sublux cerv vertebra NOS   | 1                 |
| S4981     | Cls sublux atlanto-occipitl jt | 1                 |
| S4982     | Cls sublux atlanto-axial jt    | 1                 |
| S492C     | Cls spnl dslc+cauda equina lsn | 1                 |
| S4924     | Cls spnl dslc+ant thrc crd lsn | 1                 |
| S4929     | Cls spnl dslc+ant lmb crd lsn  | 1                 |
| S490B     | Cls spnl dslc+ant cerv crd lsn | 1                 |
| S492B     | Cls spnl dsl+post lmb crd lsn  | 1                 |
| S4923     | Cls spnl dsl+comp thrc crd lsn | 1                 |
| S4928     | Cls spnl dsl+comp lmb crd lsn  | 1                 |
| S4922     | Cls spn dslc+thrc crd lsn,unsp | 1                 |
| S4926     | Cls spn dslc+post thrc crd lsn | 1                 |
| S490D     | Cls spn dslc+post cerv crd lsn | 1                 |
| S4925     | Cls spn dslc+cent thrc crd lsn | 1                 |
| S492A     | Cls spn dslc+cent lmb crd lsn  | 1                 |

| Read code | Description                                              | Number of studies |
|-----------|----------------------------------------------------------|-------------------|
| S1140     | Cls spn # + unsp lumb crd lesn                           | 1                 |
| S1144     | Cls spn # + post lumb crd lesn                           | 1                 |
| S1141     | Cls spn # + comp lumb crd lesn                           | 1                 |
| S1143     | Cls spn # + cent lumb crd lesn                           | 1                 |
| S1145     | Cls spn # + cauda equina lesn                            | 1                 |
| S1142     | Cls spn # + ant lumbr crd lesn                           | 1                 |
| SR100     | Cls fract invol head with neck                           | 1                 |
| S492z     | Cls dscl thrcic+lmb spine NOS                            | 1                 |
| S492      | Cls dscl thoracic+lumbar spine                           | 1                 |
| S4921     | Cls dscl thoracic vertebra                               | 1                 |
| S4920     | Cls dscl lumbar spine                                    | 1                 |
| S4901     | Cls dscl atlanto-occipital jnt                           | 1                 |
| S4902     | Cls dscl atlanto-axial joint                             | 1                 |
| S4F6      | Cls #-sublux,patello-fem jt                              | 1                 |
| S4J23     | Cls #-sublux st-clav jt,post                             | 1                 |
| S4J22     | Cls #-sublux st-clav jt,ant                              | 1                 |
| S4F4      | Cls #-dscl,patello-fem jt                                | 1                 |
| S4J03     | Cls #-dscl st-clav jt,post                               | 1                 |
| S4J02     | Cls #-dscl st-clav jt,ant                                | 1                 |
| S1022     | Cls # thorc vert-spondylolysis                           | 1                 |
| S1044     | Cls # lumbr vert-trnsvrse prcs                           | 1                 |
| S1042     | Cls # lumbr vert-spondylolysis                           | 1                 |
| S1043     | Cls # lumbr vert-spinous prcss                           | 1                 |
| S1045     | Cls # lumb vert-posterior arch                           | 1                 |
| S100L     | Cls # cerv vert, trnsvrse prcs                           | 1                 |
| S100N     | Cls # cerv vert, tricolumnar                             | 1                 |
| S100J     | Cls # cerv vert, spondylolysis                           | 1                 |
| S100K     | Cls # cerv vert, spinous prcss                           | 1                 |
| S100M     | Cls # cerv vert, post arch                               | 1                 |
| S1008     | Cls # atlas-isol arch/art prcs                           | 1                 |
| S412z     | Closed traumatic subluxation shoulder NOS                | 1                 |
| S496z     | Closed traumatic disloctn NOS                            | 1                 |
| S4100     | Closed traumatic dislocation shoulder joint, unspecified | 1                 |
| S463      | Closed traumatic dislocation of patello-femoral joint    | 1                 |
| S112z     | Closed thoracic#+cord lesn.NOS                           | 1                 |
| S112      | Closed thoracic #+cord lesion                            | 1                 |
| S49Cz     | Closed subluxation spine NOS                             | 1                 |
| S49A0     | Closed subluxation lumbar spine                          | 1                 |
| S4988     | Closed subluxation C7/T1                                 | 1                 |
| S4987     | Closed subluxation C6/C7                                 | 1                 |
| S4986     | Closed subluxation C5/C6                                 | 1                 |
| S4985     | Closed subluxation C4/C5                                 | 1                 |
| S4984     | Closed subluxation C3/C4                                 | 1                 |
| S4983     | Closed subluxation C2/C3                                 | 1                 |
| S49C0     | Closed sublux spine, unsp                                | 1                 |
| S49C      | Closed sublux other vertebra                             | 1                 |
| S026      | Closed orbital blow-out fracture                         | 1                 |
| S114      | Closed lumbar # + cord lesion                            | 1                 |
| S102      | Closed fracture thoracic vertebra                        | 1                 |
| S2104     | Closed fracture scapula, blade                           | 1                 |
| S2105     | Closed fracture scapula spine                            | 1                 |
| S2106     | Closed fracture scapula neck                             | 1                 |

| Read code | Description                                    | Number of studies |
|-----------|------------------------------------------------|-------------------|
| S2103     | Closed fracture scapula glenoid                | 1                 |
| S2101     | Closed fracture scapula acromion               | 1                 |
| S3204     | Closed fracture patella, comminuted (stellate) | 1                 |
| S320      | Closed fracture of the patella                 | 1                 |
| S1250     | Closed fracture larynx                         | 1                 |
| S2002     | Closed fracture clavicle shaft                 | 1                 |
| S1002     | Closed fracture axis                           | 1                 |
| S1001     | Closed fracture atlas                          | 1                 |
| S4940     | Closed dislocation spine unsp.                 | 1                 |
| S494z     | Closed dislocation spine NOS                   | 1                 |
| S490      | Closed dislocation cervical spine              | 1                 |
| S4908     | Closed dislocation C7/T1                       | 1                 |
| S4907     | Closed dislocation C6/C7                       | 1                 |
| S4906     | Closed dislocation C5/C6                       | 1                 |
| S4905     | Closed dislocation C4/C5                       | 1                 |
| S4904     | Closed dislocation C3/C4                       | 1                 |
| S4903     | Closed dislocation C2/C3                       | 1                 |
| S494      | Closed disloc.other vertebra                   | 1                 |
| S490x     | Closed disloc.mult.cerv.vert.                  | 1                 |
| S490z     | Closed disloc.cervic.vert.NOS                  | 1                 |
| S4900     | Closed disloc.cerv.spine unsp.                 | 1                 |
| S4960     | Closed disloc sternoclavic. jt                 | 1                 |
| S4104     | Closed disloc acromioclavic.jt                 | 1                 |
| S110z     | Closed cervical#+cord lesn.NOS                 | 1                 |
| S110      | Closed cervical #+cord lesion                  | 1                 |
| S1253     | Closed #trachea                                | 1                 |
| S1252     | Closed #thyroid cartilage                      | 1                 |
| S11x      | Closed #spine+cord lesn.unsp.                  | 1                 |
| S2100     | Closed #scapula-unspecified                    | 1                 |
| S210z     | Closed #scapula NOS                            | 1                 |
| S125z     | Closed #larynx/trachea NOS                     | 1                 |
| S1251     | Closed #hyoid bone                             | 1                 |
| S2000     | Closed #clavicle unspecified                   | 1                 |
| S200z     | Closed #clavicle NOS                           | 1                 |
| S3z0      | Closed #bones unspecified                      | 1                 |
| S4F2      | Closed #-sublux, knee joint                    | 1                 |
| S4A20     | Closed #-sublux shoulder joint                 | 1                 |
| S4A2      | Closed #-sublux shoulder                       | 1                 |
| S4A21     | Closed #-sublux acrom-clav jt                  | 1                 |
| S4A00     | Closed #-dslc shoulder joint                   | 1                 |
| S4A0      | Closed #-dslc shoulder                         | 1                 |
| S4F0      | Closed #-dslc knee joint                       | 1                 |
| S4A01     | Closed #-dslc acrom-clav joint                 | 1                 |
| S10x      | Closed # spine unspecif                        | 1                 |
| S210      | Closed # scapula                               | 1                 |
| S3201     | Closed # patella,proximal pole                 | 1                 |
| S3203     | Closed # patella, vertical                     | 1                 |
| S3200     | Closed # patella transverse                    | 1                 |
| S3202     | Closed # patella distal pole                   | 1                 |
| S200      | Closed # clavicle                              | 1                 |
| S100      | Closed # cervical spine                        | 1                 |
| N063000   | Climacteric arthr.-site unsp.                  | 1                 |
| N0630     | Climacteric arthr.-site unsp.                  | 1                 |

| Read code | Description                                            | Number of studies |
|-----------|--------------------------------------------------------|-------------------|
| N0631     | Climacteric arthr.-shoulder                            | 1                 |
| N0638     | Climacteric arthr.-other spec.                         | 1                 |
| N063800   | Climacteric arthr.-other spec.                         | 1                 |
| N0639     | Climacteric arthr.-multip.site                         | 1                 |
| N063900   | Climacteric arthr.-multip.site                         | 1                 |
| N063z     | Climacteric arthr.-NOS                                 | 1                 |
| N063z00   | Climacteric arthr.-NOS                                 | 1                 |
| N0991     | Clicking sternoclavic joint                            | 1                 |
| N0990     | Clicking shoulder                                      | 1                 |
| N099C     | Clicking knee                                          | 1                 |
| N099      | Clicking joint                                         | 1                 |
| N0992     | Clicking acromioclavicular joint                       | 1                 |
| N33A1     | Clavicle pain                                          | 1                 |
| S490A     | Cl spnl dslc+comp cerv crd lsn                         | 1                 |
| S4909     | Cl spnl dslc+cerv crd lsn,unsp                         | 1                 |
| S49A2     | Cl spn sublx+thrc crd lsn,unsp                         | 1                 |
| S49A6     | Cl spn sublx+post thrc crd lsn                         | 1                 |
| S49AB     | Cl spn sublx+post lmr crd lsn                          | 1                 |
| S49A7     | Cl spn sublx+lmr crd lsn,unsp                          | 1                 |
| S49A3     | Cl spn sublx+comp thrc crd lsn                         | 1                 |
| S49A8     | Cl spn sublx+comp lmr crd lsn                          | 1                 |
| S498A     | Cl spn sublx+comp cerv crd lsn                         | 1                 |
| S498C     | Cl spn sublx+cntrl crv crd lsn                         | 1                 |
| S4989     | Cl spn sublx+cerv crd lsn,unsp                         | 1                 |
| S49A5     | Cl spn sublx+cent thrc crd lsn                         | 1                 |
| S49AA     | Cl spn sublx+cent lmr crd lsn                          | 1                 |
| S49AC     | Cl spn sublx+cauda equina lsn                          | 1                 |
| S49A4     | Cl spn sublx+ant thrc crd lsn                          | 1                 |
| S49A9     | Cl spn sublx+ant lmr crd lsn                           | 1                 |
| S498D     | Cl spn sublux+post crv crd lsn                         | 1                 |
| S498B     | Cl spn sublux+ant cerv crd lsn                         | 1                 |
| S490C     | Cl spn dslc+cntrl cerv crd lsn                         | 1                 |
| S4927     | Cl spn dsl+lmr crd lsn unsp                            | 1                 |
| S1124     | Cl spn #+pst thor crd lsn,T1-6                         | 1                 |
| S1123     | Cl spn #+cnt thor crd lsn,T1-6                         | 1                 |
| S1122     | Cl spn #+ant thor crd lsn,T1-6                         | 1                 |
| S1120     | Cl sp #+unsp thor crd lsn,T1-6                         | 1                 |
| S1126     | Cl sp #+unsp thor cd lsn,T7-12                         | 1                 |
| S112A     | Cl sp #+pst thor crd lsn,T7-12                         | 1                 |
| S1129     | Cl sp #+cnt thor crd lsn,T7-12                         | 1                 |
| S1121     | Cl sp #+cmpl thor crd lsn,T1-6                         | 1                 |
| S1127     | Cl sp #+cmp thor crd lsn,T7-12                         | 1                 |
| S1128     | Cl sp #+ant thor crd lsn,T7-12                         | 1                 |
| S1500     | Cl multi fractur of thor spine                         | 1                 |
| SR160     | Cl fract/th wth lw bck+plv+lmb                         | 1                 |
| S112B     | Cl # T7-12incomp cord lsn NOS                          | 1                 |
| S1125     | Cl # T1-6 incmpl cord lesn NOS                         | 1                 |
| N301B     | Chronic osteomyelitis-th spine                         | 1                 |
| N301C     | Chronic osteomyelitis-lu spine                         | 1                 |
| N301A     | Chronic osteomyelitis-Cx spine                         | 1                 |
| N301      | Chronic osteomyelitis                                  | 1                 |
| C052*     | Chronic lymphocytic thyroiditis (Hashimotos's disease) | 1                 |

| Read code | Description                             | Number of studies |
|-----------|-----------------------------------------|-------------------|
| 16C9      | Chronic low back pain                   | 1                 |
| N090X     | Chronic joint effusion                  | 1                 |
| N3682     | Chronic instability of knee             | 1                 |
| OX7289CB  | Chronic Backache /ox                    | 1                 |
| N3010     | Chron.osteomyelitis-site unsp.          | 1                 |
| N3011     | Chron.osteomyelitis-shoulder            | 1                 |
| N3018     | Chron.osteomyelitis-other spec          | 1                 |
| N3019     | Chron.osteomyelitis-mult.site           | 1                 |
| N301z     | Chron.osteomyelitis NOS                 | 1                 |
| N301L     | Chron multifocal osteomyelitis          | 1                 |
| N301M     | Chr osteomyel + draining sinus          | 1                 |
| N074      | Chondromalacia patellae                 | 1                 |
| N33z2     | Chondromalacia NOS                      | 1                 |
| N33zB     | Chondrolysis                            | 1                 |
| N022      | Chondrocalcinosis unspecified           | 1                 |
| N022z     | Chondrocalcinosis NOS                   | 1                 |
| N02       | Chondrocalcinosis                       | 1                 |
| N0220     | Chondrocalc.unsp.-site unspec.          | 1                 |
| N0221     | Chondrocalc.unsp.-shoulder reg          | 1                 |
| N022y     | Chondrocalc.unsp.-other spec.           | 1                 |
| N022x     | Chondrocalc.unsp.-multipl.site          | 1                 |
| N020z     | Chondrocalc.dicalc.phos.NOS             | 1                 |
| N021      | Chondrocalc.-pyrophosph.cryst.          | 1                 |
| N021z     | Chondrocalc.-pyrophosph.NOS             | 1                 |
| N020      | Chondrocalc.-dicalc.phos.cryst          | 1                 |
| N0210     | Chondroc.-pyrophos.-site unsp.          | 1                 |
| N0211     | Chondroc.-pyrophos.-shoulder            | 1                 |
| N021y     | Chondroc.-pyrophos.-other spec          | 1                 |
| N021x     | Chondroc.-pyrophos.-mult.sites          | 1                 |
| N0216     | Chondroc.-pyrophos.-knee                | 1                 |
| N0200     | Chondroc.-dical.ph.-site unsp.          | 1                 |
| N0201     | Chondroc.-dical.ph.-shoulder            | 1                 |
| N020y     | Chondroc.-dical.ph.-other spec          | 1                 |
| N020x     | Chondroc.-dical.ph.-mult.sites          | 1                 |
| N33zJ     | Chondritis                              | 1                 |
| 182C      | Chest wall pain                         | 1                 |
| N035      | Charcots arthropathy                    | 1                 |
| N132      | Cervicocranial syndrome                 | 1                 |
| N133      | Cervicobrachial syndrome                | 1                 |
| N148A     | Cervico-thoracic instability            | 1                 |
| N1483     | Cervico-thoracic ankylosis              | 1                 |
| N131      | Cervicalgia                             | 1                 |
| N138      | Cervicalgia                             | 1                 |
| N13y0     | Cervical syndrome NEC                   | 1                 |
| N119      | Cervical spondylosis with radiculopathy | 1                 |
| N11E      | Cervical spondylosis                    | 1                 |
| N110-1    | Cervical spondylosis                    | 1                 |
| N110      | Cervical spond.- no myelopathy          | 1                 |
| N111      | Cervical spond.+ myelopathy             | 1                 |
| N1489     | Cervical spine instability              | 1                 |
| N1482     | Cervical spine ankylosis                | 1                 |
| N130      | Cervical spinal stenosis                | 1                 |
| N13y3     | Cervical root syndrome                  | 1                 |



| Read code | Description                     | Number of studies |
|-----------|---------------------------------|-------------------|
| N12A1     | Cervical postlaminectomy syndr  | 1                 |
| N137      | Cervical post.long.lig.ossific  | 1                 |
| SJ306     | Cervical nerve root injury - C7 | 1                 |
| SJ305     | Cervical nerve root injury - C6 | 1                 |
| SJ304     | Cervical nerve root injury - C5 | 1                 |
| SJ303     | Cervical nerve root injury - C4 | 1                 |
| SJ30      | Cervical nerve root injury      | 1                 |
| N1113     | Cervical myelopathy             | 1                 |
| N13       | Cervical disorder NOS           | 1                 |
| N12z4     | Cervical discitis               | 1                 |
| N120      | Cervical disc displ.-no myelop  | 1                 |
| N1291     | Cervical disc disord.+myelop.   | 1                 |
| N125      | Cervical disc degeneration      | 1                 |
| S5701     | Cervical ant.longit.lig.sprain  | 1                 |
| N13z      | Cervical and neck disorders NOS | 1                 |
| N12zH     | Cerv disc disord + radiculoph   | 1                 |
| N21z0     | Capsulitis NOS                  | 1                 |
| N04y0     | Caplan's syndrome               | 1                 |
| N3202     | Calve's vertebral osteochondr.  | 1                 |
| N2454     | Calf pain                       | 1                 |
| N2226     | Calcium deposit in bursa        | 1                 |
| N2111     | Calcifying tendinitis shoulder  | 1                 |
| N12zB     | Calcification of thoracic disc  | 1                 |
| N22y1     | Calcification of tendon NOS     | 1                 |
| N12zF     | Calcification of lumbar disc    | 1                 |
| N23y1     | Calcification of ligament       | 1                 |
| N12z7     | Calcification of cervical disc  | 1                 |
| N23y9     | Calcific tendinitis             | 1                 |
| N2177     | Calcaneal spur                  | 1                 |
| N2315     | Calc/ossif musc ass with burns  | 1                 |
| N0011     | CREST syndrome                  | 1                 |
| 182Z.00   | CHEST PAIN NOS                  | 1                 |
| 182..00   | CHEST PAIN                      | 1                 |
| S1007     | C7 closed # - no cord lesion    | 1                 |
| S1006     | C6 closed # - no cord lesion    | 1                 |
| 1D12.00   | C/O: stiffness                  | 1                 |
| 1D12      | C/O: stiffness                  | 1                 |
| 16C7      | C/O - upper back ache           | 1                 |
| 1A53      | C/O - lumbar pain               | 1                 |
| 16C5      | C/O - low back pain             | 1                 |
| N2118     | Bursitis of shoulder            | 1                 |
| N223      | Bursitis NOS                    | 1                 |
| N2160-99  | Bursitis - knee                 | 1                 |
| N2160     | Bursitis - knee                 | 1                 |
| N221      | Bunion                          | 1                 |
| 16BZ      | Bruising symptom NOS            | 1                 |
| 16B       | Bruising symptom                | 1                 |
| 16B2      | Bruises easily                  | 1                 |
| SE4z      | Bruise NOS                      | 1                 |
| SE41      | Bruise - knee/lower leg         | 1                 |
| SE41-99   | Bruise - knee/lower leg         | 1                 |
| SE23      | Bruise - back                   | 1                 |
| N11y0     | Brucella spondylitis            | 1                 |

| Read code | Description                       | Number of studies |
|-----------|-----------------------------------|-------------------|
| N3325     | Brown tumour-hyperparathyroid     | 1                 |
| N301G     | Brodie's abscess-thorac spine     | 1                 |
| N301H     | Brodie's abscess-lumbar spine     | 1                 |
| N301F     | Brodie's abscess-cervic spine     | 1                 |
| N302b     | Brodie's abscess                  | 1                 |
| N0503     | Bouchard's nodes with arthropathy | 1                 |
| N33z      | Bone/cartilage disorder NOS       | 1                 |
| N33z0     | Bone/cartilage dis.-unspecif.     | 1                 |
| N21z3     | Bone spur NOS                     | 1                 |
| N33A      | Bone pain                         | 1                 |
| N33zz     | Bone or cartilage disorders NOS   | 1                 |
| N31z      | Bone involvement in dis.EC NOS    | 1                 |
| N30z0     | Bone infectn.NOS-site unspecif    | 1                 |
| N30z1     | Bone infectn.NOS-shoulder         | 1                 |
| N30z9     | Bone infectn.NOS-multiple site    | 1                 |
| N30z      | Bone infection NOS                | 1                 |
| N30zz     | Bone infection NOS                | 1                 |
| N3320     | Bone cyst (localised),unspecif    | 1                 |
| N3y0      | Biomec lesn,not elsewh clas       | 1                 |
| N2112     | Bicipital tenosynovitis           | 1                 |
| N2134     | Biceps tendinitis                 | 1                 |
| N0120     | Behcet's syndrome arthropathy     | 1                 |
| N2222     | Beat knee                         | 1                 |
| N0870     | Bankart lesion                    | 1                 |
| N224A     | Baker's cyst                      | 1                 |
| N224A-1   | Baker's cyst                      | 1                 |
| 16        | Baker's cyst                      | 1                 |
| 16C3      | Backache with radiation           | 1                 |
| 16CZ      | Backache symptom NOS              | 1                 |
| 16C       | Backache symptom                  | 1                 |
| 16C2      | Backache                          | 1                 |
| N149      | Back stiffness                    | 1                 |
| S57       | Back sprain excl. lumbosacral     | 1                 |
| 16...     | Back sprain NOS                   | 1                 |
| S57z      | Back sprain NOS                   | 1                 |
| 16C4      | Back pain worse on sneezing       | 1                 |
| 16C6      | Back pain without radiat NOS      | 1                 |
| N145-2    | Back pain unspecified             | 1                 |
| N143      | Back pain - lower                 | 1                 |
| UNMAPPC6  | Back injury                       | 1                 |
| N14       | Back disorders - other            | 1                 |
| N14z      | Back disorder/symptom NOS         | 1                 |
| OX8479    | Back Strain/Sprain /ox            | 1                 |
| OX7289A   | Back Pain With Sciatica /ox       | 1                 |
| N2455     | Axillary pain                     | 1                 |
| N3347     | Avascular necrosis-other bone     | 1                 |
| N3345     | Avascular necrosis, capitellum    | 1                 |
| N334      | Avascular necrosis - bone         | 1                 |
| N334z     | Avascular bone necrosis NOS       | 1                 |
| N3340     | Avasc.bone necrosis site unsp.    | 1                 |
| N3383     | Atrophic non-union of fracture    | 1                 |
| S5703     | Atlanto-occipital joint sprain    | 1                 |
| N1487     | Atlanto-occipital instability     | 1                 |

| Read code | Description                                           | Number of studies |
|-----------|-------------------------------------------------------|-------------------|
| N1480     | Atlanto-occipital ankylosis                           | 1                 |
| S5702     | Atlanto-axial joint sprain                            | 1                 |
| N1488     | Atlanto-axial instability                             | 1                 |
| N1481     | Atlanto-axial ankylosis                               | 1                 |
| 14OD      | At risk of osteoporotic fracture                      | 1                 |
| 14O9      | At risk of osteoporosis                               | 1                 |
| N080z     | Articular cartilage disord.NOS                        | 1                 |
| N080      | Articular cart.disor.excl.knee                        | 1                 |
| N0800     | Artic.cart.dis.-site unspecif.                        | 1                 |
| N0801     | Artic.cart.dis.-shoulder                              | 1                 |
| N0807     | Artic.cart.dis.-other specif.                         | 1                 |
| N0808     | Artic.cart.dis.-multiple sites                        | 1                 |
| N080B     | Artic cart disord oth j-should                        | 1                 |
| N0539     | Arthrosis of first carpometacarpal joint, unspecified | 1                 |
| OX7131C   | Arthrosis Spine /ox                                   | 1                 |
| N0312     | Arthropathy-Whipple's disease                         | 1                 |
| N034      | Arthropathy+respiratory disord                        | 1                 |
| N015      | Arthropathy+other viral diseas                        | 1                 |
| N01y      | Arthropathy+other inf./parasit                        | 1                 |
| N03y      | Arthropathy+other condition EC                        | 1                 |
| N015z     | Arthropathy+oth.viral dis. NOS                        | 1                 |
| N014      | Arthropathy+oth.bacterial dis.                        | 1                 |
| N017z     | Arthropathy+helminthiasis NOS                         | 1                 |
| N032      | Arthropathy+haematological dis                        | 1                 |
| N031      | Arthropathy+gastrointestin.dis                        | 1                 |
| N030      | Arthropathy+endocr./metab.dis                         | 1                 |
| N033      | Arthropathy+dermatological dis                        | 1                 |
| N01       | Arthropathy with infections                           | 1                 |
| N0310     | Arthropathy in ulcerative colitis                     | 1                 |
| N069      | Arthropathy in neoplastic dis                         | 1                 |
| N0302     | Arthropathy in amyloidosis                            | 1                 |
| N0148     | Arthropathy in Whipple's disea                        | 1                 |
| N0311     | Arthropathy in Crohn's disease                        | 1                 |
| N0320     | Arthropathy due to haemophilia                        | 1                 |
| N06z1     | Arthropathy NOS-shoulder                              | 1                 |
| N06z4     | Arthropathy NOS-hand                                  | 1                 |
| N06z3     | Arthropathy NOS-forearm                               | 1                 |
| N06z7     | Arthropathy NOS, of the ankle and foot                | 1                 |
| N017      | Arthropathy + parasite infectn                        | 1                 |
| N016z     | Arthropathy + mycoses NOS                             | 1                 |
| N016      | Arthropathy + mycoses                                 | 1                 |
| N03z      | Arthropathy + disorders EC NOS                        | 1                 |
| N03       | Arthropathy + disorders EC                            | 1                 |
| N0y       | Arthropathies OS                                      | 1                 |
| N0313     | Arthropath follow intes bypass                        | 1                 |
| N036      | Arthrop-hypersensitivity reacn                        | 1                 |
| N012      | Arthrop+Behcet's syndrome                             | 1                 |
| N0121     | Arthrop+Behcet's synd-shoulder                        | 1                 |
| N012y     | Arthrop+Behcet's synd-oth spec                        | 1                 |
| N012x     | Arthrop+Behcet's synd-multiple                        | 1                 |
| N012z     | Arthrop+Behcet's synd NOS                             | 1                 |
| N2330     | Arthrogryposis                                        | 1                 |
| N0        | Arthritis/arthrosis                                   | 1                 |

| Read code | Description                       | Number of studies |
|-----------|-----------------------------------|-------------------|
| N11       | Arthritis of spine                | 1                 |
| N010A     | Arthritis in Lyme disease         | 1                 |
| OX6960T   | Arthritis Psoriatic /ox           | 1                 |
| N06z-1    | Arthritis                         | 1                 |
| N094F     | Arthralgia of wrist               | 1                 |
| N094N     | Arthralgia of tibio-fibular joint | 1                 |
| N094A     | Arthralgia of shoulder            | 1                 |
| N094M     | Arthralgia of knee                | 1                 |
| N094D     | Arthralgia of elbow               | 1                 |
| N094P     | Arthralgia of ankle               | 1                 |
| N094H     | Arthralgia of PIP joint of finger | 1                 |
| N094G     | Arthralgia of MCP joint           | 1                 |
| N094T     | Arthralgia of 1st MTP joint       | 1                 |
| N0942     | Arthralgia - upper arm            | 1                 |
| N094B     | Arthralgia - sternoclav joint     | 1                 |
| N0941     | Arthralgia - shoulder             | 1                 |
| N0945     | Arthralgia - pelvic/thigh         | 1                 |
| N0944     | Arthralgia - hand                 | 1                 |
| N0943     | Arthralgia - forearm              | 1                 |
| N0947     | Arthralgia - ankle/foot           | 1                 |
| N094C     | Arthralgia - acromioclav joint    | 1                 |
| EGTON1    | Arthralgia                        | 1                 |
| N0150     | Arthr.+oth.viral dis-site unsp    | 1                 |
| N0151     | Arthr.+oth.viral dis-shoulder     | 1                 |
| N0140     | Arthr.+oth.bact.dis-site unsp.    | 1                 |
| N0141     | Arthr.+oth.bact.dis-shoulder      | 1                 |
| N014y     | Arthr.+oth.bact.dis-other spec    | 1                 |
| N014x     | Arthr.+oth.bact.dis-mult.sites    | 1                 |
| N014z     | Arthr.+oth.bact. disease NOS      | 1                 |
| N0160     | Arthr.+mycoses-site unspecif.     | 1                 |
| N0161     | Arthr.+mycoses-shoulder region    | 1                 |
| N016y     | Arthr.+mycoses-other specified    | 1                 |
| N016x     | Arthr.+mycoses-multiple sites     | 1                 |
| N0170     | Arthr.+helminth.-site unspec.     | 1                 |
| N0171     | Arthr.+helminth.-shoulder regn    | 1                 |
| N017y     | Arthr.+helminth.-other specif.    | 1                 |
| N017x     | Arthr.+helminth.-multiple site    | 1                 |
| N015y     | Arthr+oth.viral dis-other spec    | 1                 |
| N015x     | Arthr+oth.viral dis-mult.sites    | 1                 |
| N03x0     | Arthr assoc oth dis-shoulder      | 1                 |
| N03xB     | Arthr assoc oth dis-knee          | 1                 |
| N03x1     | Arthr ass oth dis-sternoclav j    | 1                 |
| N03x2     | Arthr ass oth dis-acromioclav j   | 1                 |
| N01yz     | Arth+other infect./parasit.NOS    | 1                 |
| N01y0     | Arth+oth.inf/para-site unspec.    | 1                 |
| N01y1     | Arth+oth.inf/para-shoulder reg    | 1                 |
| N01yy     | Arth+oth.inf/para-other specif    | 1                 |
| N01yx     | Arth+oth.inf/para-multipl.site    | 1                 |
| N245-2    | Arm pain                          | 1                 |
| N32z0     | Apophysitis NOS                   | 1                 |
| N006      | Antiphospholipid syndrome         | 1                 |
| 1M12      | Anterior knee pain                | 1                 |
| N094W     | Anterior knee pain                | 1                 |

| Read code | Description                      | Number of studies |
|-----------|----------------------------------|-------------------|
| S4101     | Anterior dislocation of shoulder | 1                 |
| N12z9     | Annular tear of thoracic disc    | 1                 |
| N12zD     | Annular tear of lumbar disc      | 1                 |
| N12z5     | Annular tear of cervical disc    | 1                 |
| N148      | Ankylosis/instab Cx,Th,Lu spin   | 1                 |
| N085B     | Ankylosis other joint-shoulder   | 1                 |
| N085P     | Ankylosis of the knee joint      | 1                 |
| N085A     | Ankylosis of shoulder joint      | 1                 |
| N0859     | Ankylosis of multiple joints     | 1                 |
| N085z     | Ankylosis of joint NOS           | 1                 |
| N085      | Ankylosis of joint               | 1                 |
| N117      | Ankylosing verteb.hyperostosis   | 1                 |
| N100*     | Ankylosing spondylitis           | 1                 |
| N100      | Ankylosing spondylitis           | 1                 |
| N245-1    | Ankle pain                       | 1                 |
| 1M13      | Ankle pain                       | 1                 |
| N05z7-1   | Ankle osteoarthritis NOS         | 1                 |
| N3384     | Angular mal-union of fracture    | 1                 |
| N3322     | Aneurysmal bone cyst             | 1                 |
| N2320     | Amyotrophia NOS                  | 1                 |
| N0620     | Allergic arthritis-site unsp.    | 1                 |
| N0621     | Allergic arthritis-shoulder      | 1                 |
| N0628     | Allergic arthritis-other spec.   | 1                 |
| N0629     | Allergic arthritis-multip.site   | 1                 |
| N062z     | Allergic arthritis-NOS           | 1                 |
| N062      | Allergic arthritis               | 1                 |
| N337z     | Algoneurodystrophy NOS           | 1                 |
| N3373     | Algodystrophy of knee            | 1                 |
| N04y2     | Adult-onset Still's disease      | 1                 |
| N32y0     | Adult osteochondrosis of spine   | 1                 |
| N005      | Adult Still's Disease            | 1                 |
| N370      | Adolescent postural kyphosis     | 1                 |
| N3737     | Adolescent idiopath scoliosis    | 1                 |
| N210      | Adhesive capsulitis - shoulde    | 1                 |
| N2156     | Adductor tendinitis              | 1                 |
| N084D     | Adduction contracture-shoulder   | 1                 |
| N0431     | Acute polyartic.juvenile R.A.    | 1                 |
| N300B     | Acute osteomyelitis-thor spine   | 1                 |
| N3000     | Acute osteomyelitis-site unsp.   | 1                 |
| N3001     | Acute osteomyelitis-shoulder     | 1                 |
| N300G     | Acute osteomyelitis-scapula      | 1                 |
| N300R     | Acute osteomyelitis-patella      | 1                 |
| N3008     | Acute osteomyelitis-other spec   | 1                 |
| N3009     | Acute osteomyelitis-mult.site    | 1                 |
| N300C     | Acute osteomyelitis-lumb spine   | 1                 |
| N300F     | Acute osteomyelitis-clavicle     | 1                 |
| N300A     | Acute osteomyelitis-cerv spine   | 1                 |
| N300z     | Acute osteomyelitis NOS          | 1                 |
| N300      | Acute osteomyelitis              | 1                 |
| S460      | Acute meniscal tear medial       | 1                 |
| S461      | Acute meniscal tear lateral      | 1                 |
| N090Y     | Acute joint effusion             | 1                 |
| N300Z     | Acute haematogen osteomyelitis   | 1                 |

| Read code | Description                    | Number of studies |
|-----------|--------------------------------|-------------------|
| N145      | Acute back pain - unspecified  | 1                 |
| N145-1    | Acute back pain - unspecified  | 1                 |
| N141      | Acute back pain - thoracic     | 1                 |
| N141-1    | Acute back pain - thoracic     | 1                 |
| N142      | Acute back pain - lumbar       | 1                 |
| N142-3    | Acute back pain - lumbar       | 1                 |
| N12       | Acute back pain - disc         | 1                 |
| N143-1    | Acute back pain + sciatica     | 1                 |
| N06zA     | Acute arthritis                | 1                 |
| EGTONAC1  | Acromio-Clavicular Dislocation | 1                 |
| N384      | Acquired spondylolisthesis     | 1                 |
| N3720     | Acquired postural lordosis     | 1                 |
| N3710     | Acquired postural kyphosis     | 1                 |
| N372z     | Acquired lordosis NOS          | 1                 |
| N372      | Acquired lordosis              | 1                 |
| N371z     | Acquired kyphosis NOS          | 1                 |
| N371      | Acquired kyphosis              | 1                 |
| N366      | Acquired knee deformity NOS    | 1                 |
| N37z0     | Acquired hunchback             | 1                 |
| N3641     | Acquired genu varum            | 1                 |
| N364z     | Acquired genu valgum/varum NOS | 1                 |
| N364      | Acquired genu valgum/varum     | 1                 |
| N3640     | Acquired genu valgum           | 1                 |
| N385      | Acquired deformity spine NOS   | 1                 |
| N382      | Acquired deformity of neck     | 1                 |
| N38z      | Acquired deformity NOS         | 1                 |
| N38y0     | Acquired clavicle deformity    | 1                 |
| 1DCC.00   | Aching muscles                 | 1                 |
| 1DCC      | Aching muscles                 | 1                 |
| N220H     | Achilles tenosynovitis         | 1                 |
| N2174     | Achilles tendinitis            | 1                 |
| N094-1    | Ache in joint                  | 1                 |
| S4604     | Ac mnscl tr,med,periph,dtchmt  | 1                 |
| S4614     | Ac mnscl tr,lat,periph,dtchmt  | 1                 |
| S4605     | Ac mnscl tear,med,horiz clvge  | 1                 |
| S4615     | Ac mnscl tear,lat,horiz clvge  | 1                 |
| S4602     | Ac menscl tear,med,bckt hndle  | 1                 |
| S4612     | Ac menscl tear,lat,bckt hndle  | 1                 |
| S4603     | Ac meniscal tear,med,radial    | 1                 |
| S4601     | Ac meniscal tear,med,post horn | 1                 |
| S4600     | Ac meniscal tear,med,ant horn  | 1                 |
| S4613     | Ac meniscal tear,lat,radial    | 1                 |
| S4611     | Ac meniscal tear,lat,post horn | 1                 |
| S4610     | Ac meniscal tear,lat,ant horn  | 1                 |
| N22y2     | Abscess of tendon              | 1                 |
| N22yE     | Abscess of bursa-shoulder      | 1                 |
| N22yJ     | Abscess of bursa-knee          | 1                 |
| N22y3     | Abscess of bursa               | 1                 |
| SD        | Abrasions                      | 1                 |
| N084C     | Abduction contracture-shoulder | 1                 |
| 1969.00   | Abdominal pain                 | 1                 |
| EGTON251  | ? Frozen Right Shoulder        | 1                 |
| N11C1     | 2 lev lumbac spond+radiculop   | 1                 |

| <b>Read code</b> | <b>Description</b>             | <b>Number of studies</b> |
|------------------|--------------------------------|--------------------------|
| N11C0            | 1 lev lumbsac spond+radiculop  | 1                        |
| HNG0160          | (hn) Sports Injury             | 1                        |
| HNG0157          | (hn) Spinal Injury             | 1                        |
| HNG0162          | (hn) Soft tissue injuries      | 1                        |
| HNG0163          | (hn) Rhematic problems         | 1                        |
| S11              | #Vertebra + cord lesion        | 1                        |
| S10z             | #Spine - no cord lesion - NOS  | 1                        |
| S10              | #Spine - no cord lesion        | 1                        |
| S11z             | #Spine + cord lesion NOS       | 1                        |
| S21z             | #Scapula NOS                   | 1                        |
| S21              | #Scapula                       | 1                        |
| S32z             | #Patella NOS                   | 1                        |
| S104             | #Lumbar spine - no cord lesion | 1                        |
| S32              | #Knee-cap                      | 1                        |
| S20z             | #Clavicle NOS                  | 1                        |
| S20              | #Clavicle                      | 1                        |
| S3zz             | #Bones NOS                     | 1                        |
| S4F              | #-dslc/subluxation knee        | 1                        |
| S4A              | #-dslc or subluxation shoulder | 1                        |

**Table 10. List of Read codes used in the studies of male sexual dysfunction.**

| <b>Read code</b> | <b>Description</b>                               | <b>Number of studies</b> |
|------------------|--------------------------------------------------|--------------------------|
| E227311          | Erectile dysfunction                             | 3                        |
| K27y100          | Impotence of organic origin                      | 2                        |
| E227300          | Impotence                                        | 2                        |
| Eu52213          | [X]Psychogenic impotence                         | 1                        |
| Eu52212          | [X]Male erectile disorder                        | 1                        |
| E227000          | Unspecified psychosexual dysfunction             | 1                        |
| 7C25E00          | Treatment of erectile dysfunction NEC            | 1                        |
| 7A6G000          | Revascularisation for impotence                  | 1                        |
| 8IE8.00          | Referral to erectile dysfunction clinic declined | 1                        |
| 8HTj.00          | Referral to erectile dysfunction clinic          | 1                        |
| E227z00          | Psychosexual dysfunction NOS                     | 1                        |
| E227.00          | Psychosexual dysfunction                         | 1                        |
| E227700          | Psychogenic dyspareunia                          | 1                        |
| Z9E9.00          | Provision of device for impotence                | 1                        |
| E227600          | Premature ejaculation                            | 1                        |
| 7C25F00          | Operations on penis for erectile dysfunction NEC | 1                        |
| 7A6G500          | Ligation of penile veins for impotence           | 1                        |
| E227.11          | Lack of libido                                   | 1                        |
| E227100          | Inhibited sexual desire                          | 1                        |
| E227500          | Inhibited male orgasm                            | 1                        |
| E227z11          | Fear of ejaculation                              | 1                        |
| K27y700          | Erectile dysfunction due to diabetes mellitus    | 1                        |
| 66Au.00          | Diabetic erectile dysfunction review             | 1                        |
| 66Av.00          | Diabetic assessment of erectile dysfunction      | 1                        |
| 1D1B.00          | C/O erectile dysfunction                         | 1                        |
| ZG43600          | Advice on technique for impotence                | 1                        |
| 67IA.00          | Advice about impotence                           | 1                        |



**Table 11. List of Read codes used in the studies of sleep disorder.**

| <b>Read code</b> | <b>Description</b>                                | <b>Number of studies</b> |
|------------------|---------------------------------------------------|--------------------------|
| 1B1B.00          | Cannot sleep - insomnia                           | 1                        |
| 1B1B.11          | C/O - insomnia                                    | 1                        |
| 1B1B100          | Middle insomnia                                   | 1                        |
| 1B1B200          | Late insomnia                                     | 1                        |
| 1B1Q.00          | Poor sleep pattern                                | 1                        |
| E274.00          | Non-organic sleep disorders                       | 1                        |
| E274.11          | Hypersomnia of non-organic origin                 | 1                        |
| E274.12          | Insomnia due to nonorganic sleep disorder         | 1                        |
| E274000          | Unspecified non-organic sleep disorder            | 1                        |
| E274100          | Transient insomnia                                | 1                        |
| E274111          | Insomnia NOS                                      | 1                        |
| E274200          | Persistent insomnia                               | 1                        |
| E274300          | Transient hypersomnia                             | 1                        |
| E274311          | Hypersomnia NOS                                   | 1                        |
| E274400          | Persistent hypersomnia                            | 1                        |
| E274500          | Jet lag syndrome                                  | 1                        |
| E274600          | Shifting sleep-work schedule                      | 1                        |
| E274700          | Somnambulism - sleep walking                      | 1                        |
| E274800          | Night terrors                                     | 1                        |
| E274900          | Nightmares                                        | 1                        |
| E274A00          | Sleep drunkenness                                 | 1                        |
| E274B00          | Repeated rapid eye movement sleep interruptions   | 1                        |
| E274C00          | Other sleep stage or arousal dysfunction          | 1                        |
| E274D00          | Repetitive intrusions of sleep                    | 1                        |
| E274D11          | Restless sleep                                    | 1                        |
| E274E00          | 'Short-sleeper'                                   | 1                        |
| E274F00          | Inversion of sleep rhythm                         | 1                        |
| E274y00          | Other non-organic sleep disorder                  | 1                        |
| E274y11          | Dreams                                            | 1                        |
| E274z00          | Non-organic sleep disorder NOS                    | 1                        |
| Eu51.00          | [X]Nonorganic sleep disorders                     | 1                        |
| Eu51000          | [X]Nonorganic insomnia                            | 1                        |
| Eu51100          | [X]Nonorganic hypersomnia                         | 1                        |
| Eu51200          | [X]Nonorganic disorder of the sleep-wake schedule | 1                        |
| Fy00.00          | Disorders of initiating and maintaining sleep     | 1                        |
| Fy01.00          | Disorders of excessive somnolence                 | 1                        |
| Fy02.00          | Disorders of the sleep-wake schedule              | 1                        |
| R005.00          | [D]Sleep disturbances                             | 1                        |
| R005.11          | [D]Insomnia - symptom                             | 1                        |
| R005.12          | [D]Sleep rhythm problems                          | 1                        |
| R005000          | [D]Sleep disturbance, unspecified                 | 1                        |
| R005100          | [D]Insomnia with sleep apnoea                     | 1                        |
| R005200          | [D]Insomnia NOS                                   | 1                        |
| R005300          | [D]Hypersomnia with sleep apnoea                  | 1                        |
| R005311          | [D]Sleep apnoea syndrome                          | 1                        |
| R005312          | [D]Syndrome sleep apnoea                          | 1                        |
| R005400          | [D]Hypersomnia NOS                                | 1                        |
| R005500          | [D]Sleep rhythm inversion                         | 1                        |
| R005600          | [D]Sleep rhythm irregular                         | 1                        |
| R005700          | [D]Sleep-wake rhythm non-24-hour cycle            | 1                        |
| R005800          | [D]Sleep dysfunction with sleep stage disturbance | 1                        |

| <b>Read code</b> | <b>Description</b>                            | <b>Number of studies</b> |
|------------------|-----------------------------------------------|--------------------------|
| R005900          | [D]Sleep dysfunction with arousal disturbance | 1                        |
| R005z00          | [D]Sleep dysfunction NOS                      | 1                        |

**Table 12. List of Read codes used in the studies of fatal and non-fatal self-harm.**

| Read code | Description                                                  | Number of studies |
|-----------|--------------------------------------------------------------|-------------------|
| TK1y.00   | Suicide and selfinflicted poisoning by other utility gas     | 8                 |
| TK21.00   | Suicide and selfinflicted poisoning by other carbon monoxide | 8                 |
| TK01000   | Suicide and self inflicted injury by Amylobarbitone          | 8                 |
| TK03.00   | Suicide + selfinflicted poisoning tranquilliser/psychotropic | 8                 |
| TK0z.00   | Suicide + selfinflicted poisoning by solid/liquid subst NOS  | 8                 |
| TK04.00   | Suicide + selfinflicted poisoning by other drugs/medicines   | 8                 |
| TK02.00   | Suicide + selfinflicted poisoning by oth sedatives/hypnotics | 8                 |
| TK20.00   | Suicide + selfinflicted poisoning by motor veh exhaust gas   | 8                 |
| TK05.00   | Suicide + selfinflicted poisoning by drug or medicine NOS    | 8                 |
| TK07.00   | Suicide + selfinflicted poisoning by corrosive/caustic subst | 8                 |
| TK01.00   | Suicide + selfinflicted poisoning by barbiturates            | 8                 |
| TK00.00   | Suicide + selfinflicted poisoning by analgesic/antipyretic   | 8                 |
| TK06.00   | Suicide + selfinflicted poisoning by agricultural chemical   | 8                 |
| U200.00   | [X]Intent self poison/exposure to nonopioid analgesic        | 7                 |
| U20..11   | [X]Deliberate drug overdose / other poisoning                | 7                 |
| TK70.00   | Suicide+selfinflicted injury-jump from residential premises  | 7                 |
| TK71.00   | Suicide+selfinflicted injury-jump from oth manmade structure | 7                 |
| TK72.00   | Suicide+selfinflicted injury-jump from natural sites         | 7                 |
| TK7z.00   | Suicide+selfinflicted injury-jump from high place NOS        | 7                 |
| TK61.00   | Suicide and selfinflicted injury by stabbing                 | 7                 |
| TK51.00   | Suicide and selfinflicted injury by shotgun                  | 7                 |
| TKx2.00   | Suicide and selfinflicted injury by scald                    | 7                 |
| TKxy.00   | Suicide and selfinflicted injury by other specified means    | 7                 |
| TK54.00   | Suicide and selfinflicted injury by other firearm            | 7                 |
| TK52.00   | Suicide and selfinflicted injury by hunting rifle            | 7                 |
| TK30.00   | Suicide and selfinflicted injury by hanging                  | 7                 |
| TK6z.00   | Suicide and selfinflicted injury by cutting and stabbing NOS | 7                 |
| TK60.00   | Suicide and selfinflicted injury by cutting                  | 7                 |
| TKx5.00   | Suicide and selfinflicted injury by crashing motor vehicle   | 7                 |
| TKx1.00   | Suicide and selfinflicted injury by burns or fire            | 7                 |
| TK...00   | Suicide and selfinflicted injury                             | 7                 |
| TK01400   | Suicide and self inflicted injury by Phenobarbitone          | 7                 |
| TK01100   | Suicide and self inflicted injury by Barbitone               | 7                 |
| TK...14   | Suicide and self harm                                        | 7                 |
| TK0..00   | Suicide + selfinflicted poisoning by solid/liquid substances | 7                 |
| TK2..00   | Suicide + selfinflicted poisoning by other gases and vapours | 7                 |
| TK11.00   | Suicide + selfinflicted poisoning by liquified petrol gas    | 7                 |
| TK2z.00   | Suicide + selfinflicted poisoning by gases and vapours NOS   | 7                 |
| TK10.00   | Suicide + selfinflicted poisoning by gas via pipeline        | 7                 |
| TK1z.00   | Suicide + selfinflicted poisoning by domestic gases NOS      | 7                 |
| TKx0000   | Suicide + selfinflicted injury-jumping before moving object  | 7                 |
| TK31.00   | Suicide + selfinflicted injury by suffocation by plastic bag | 7                 |
| TK3y.00   | Suicide + selfinflicted inj oth mean hang/strangle/suffocate | 7                 |
| TK3z.00   | Suicide + selfinflicted inj by hang/strangle/suffocate NOS   | 7                 |
| TK...13   | Poisoning - self-inflicted                                   | 7                 |
| TK...17   | Para-suicide                                                 | 7                 |
| TK...11   | Cause of overdose - deliberate                               | 7                 |
| TK...15   | Attempted suicide                                            | 7                 |
| U2...13   | [X]Suicide                                                   | 6                 |
| U20C.11   | [X]Self poisoning with weedkiller                            | 6                 |
| U20C.12   | [X]Self poisoning with paraquat                              | 6                 |

| Read code | Description                                                  | Number of studies |
|-----------|--------------------------------------------------------------|-------------------|
| U20A.11   | [X]Self poisoning from glue solvent                          | 6                 |
| U20B.11   | [X]Self carbon monoxide poisoning                            | 6                 |
| U2...15   | [X]Para-suicide                                              | 6                 |
| U20..00   | [X]Intentional self poisoning/exposure to noxious substances | 6                 |
| U20A.00   | [X]Intentional self poison organ solvent,halogen hydrocarb   | 6                 |
| U20y.00   | [X]Intent self poison/exposure to unspecif chemical          | 6                 |
| U202.00   | [X]Intent self poison/exposure to sedative hypnotic          | 6                 |
| U204.00   | [X]Intent self poison/exposure to psychotropic drug          | 6                 |
| U20C.00   | [X]Intent self poison/exposure to pesticide                  | 6                 |
| U20B.00   | [X]Intent self poison/exposure to other gas/vapour           | 6                 |
| U207.00   | [X]Intent self poison/exposure to oth autonomic drug         | 6                 |
| U206.00   | [X]Intent self poison/exposure to hallucinogen               | 6                 |
| U201.00   | [X]Intent self poison/exposure to antiepileptic              | 6                 |
| U20yz00   | [X]Intent self poison unspecif chemical unspecif place       | 6                 |
| U202z00   | [X]Intent self poison sedative hypnotic unspecif place       | 6                 |
| U204z00   | [X]Intent self poison psychotropic drug unspecif place       | 6                 |
| U204100   | [X]Intent self poison psychotropic drug at res institut      | 6                 |
| U20Bz00   | [X]Intent self poison other gas/vapour unspecif place        | 6                 |
| U208z00   | [X]Intent self poison oth/unsp drug/medic unspecif place     | 6                 |
| U207z00   | [X]Intent self poison oth autonomic drug unspecif place      | 6                 |
| U200z00   | [X]Intent self poison nonopioid analgesic unspecif place     | 6                 |
| U200100   | [X]Intent self poison nonopioid analgesic at res institut    | 6                 |
| U205z00   | [X]Intent self poison narcotic drug unspecif place           | 6                 |
| U201z00   | [X]Intent self poison antiepileptic unspecif place           | 6                 |
| U206400   | [X]Intent self pois hallucinogen in street/highway           | 6                 |
| U20y000   | [X]Int self poison/exposure to unspecif chemical at home     | 6                 |
| U202000   | [X]Int self poison/exposure to sedative hypnotic at home     | 6                 |
| U204000   | [X]Int self poison/exposure to psychotropic drug at home     | 6                 |
| U20C000   | [X]Int self poison/exposure to pesticide at home             | 6                 |
| U208.00   | [X]Int self poison/exposure to other/unspec drug/medicament  | 6                 |
| U20B000   | [X]Int self poison/exposure to other gas/vapour at home      | 6                 |
| U207000   | [X]Int self poison/exposure to oth autonomic drug at home    | 6                 |
| U200000   | [X]Int self poison/exposure to nonopioid analgesic at home   | 6                 |
| U205000   | [X]Int self poison/exposure to narcotic drug at home         | 6                 |
| U201000   | [X]Int self poison/exposure to antiepileptic at home         | 6                 |
| U20y200   | [X]Int self poison unspecif chemical school/pub admin area   | 6                 |
| U202y00   | [X]Int self poison sedative hypnotic other spec place        | 6                 |
| U204y00   | [X]Int self poison psychotropic drug other spec place        | 6                 |
| U20Cy00   | [X]Int self poison pesticide other spec place                | 6                 |
| U20B200   | [X]Int self poison other gas/vapour school/pub admin area    | 6                 |
| U20By00   | [X]Int self poison other gas/vapour other spec place         | 6                 |
| U208y00   | [X]Int self poison oth/unsp drug/medic other spec place      | 6                 |
| U20A400   | [X]Int self poison org solvent,halogen hydrocarb,in highway  | 6                 |
| U200y00   | [X]Int self poison nonopioid analgesic other spec place      | 6                 |
| U205y00   | [X]Int self poison narcotic drug other spec place            | 6                 |
| U2...14   | [X]Attempted suicide                                         | 6                 |
| TKx7.00   | Suicide and selfinflicted injury caustic subst, excl poison  | 6                 |
| TKxz.00   | Suicide and selfinflicted injury by other means NOS          | 6                 |
| TKx..00   | Suicide and selfinflicted injury by other means              | 6                 |
| TK7..00   | Suicide and selfinflicted injury by jumping from high place  | 6                 |
| TKx3.00   | Suicide and selfinflicted injury by extremes of cold         | 6                 |
| TKx4.00   | Suicide and selfinflicted injury by electrocution            | 6                 |
| TK4..00   | Suicide and selfinflicted injury by drowning                 | 6                 |

| Read code | Description                                                    | Number of studies |
|-----------|----------------------------------------------------------------|-------------------|
| TK6..00   | Suicide and selfinflicted injury by cutting and stabbing       | 6                 |
| TKz..00   | Suicide and selfinflicted injury NOS                           | 6                 |
| TK1..00   | Suicide + selfinflicted poisoning by gases in domestic use     | 6                 |
| TKx0.00   | Suicide + selfinflicted injury-jump/lie before moving object   | 6                 |
| TK3..00   | Suicide + selfinflicted injury by hang/strangulate/suffocate   | 6                 |
| U2y0.00   | [X]Intentionl self harm by oth specif means occurrn at home    | 5                 |
| U2z0.00   | [X]Intentional self harm by unspecif means occurrn at home     | 5                 |
| U290.00   | [X]Intentional self harm by sharp object occurrence at home    | 5                 |
| U29z.00   | [X]Intentional self harm by sharp object occ unspecif place    | 5                 |
| U2A0.00   | [X]Intentional self harm by blunt object occurrence at home    | 5                 |
| U270.00   | [X]Intention self harm by smoke fire/flames occurrn at home    | 5                 |
| U294.00   | [X]Intention self harm by sharp object occ street/highway      | 5                 |
| U29y.00   | [X]Intention self harm by sharp object occ oth specif place    | 5                 |
| U205.00   | [X]Intent self poison/exposure to narcotic drug                | 5                 |
| U209.00   | [X]Intent self poison/exposure to alcohol                      | 5                 |
| U209z00   | [X]Intent self poison alcohol unspecif place                   | 5                 |
| U202400   | [X]Intent self pois sedative hypnotic in street/highway        | 5                 |
| U208400   | [X]Intent self pois oth/unsp drug/medic in street/highway      | 5                 |
| U20A000   | [X]Intent self pois organ solvent,halogen hydrocarb, home      | 5                 |
| U200500   | [X]Intent self pois nonopioid analgesic trade/service area     | 5                 |
| U250.00   | [X]Intent self harm oth/unspecif firearm disch occ at home     | 5                 |
| U2D6.00   | [X]Intent self harm crash motor vehic occ indust/constr area   | 5                 |
| U2zy.00   | [X]Intent self harm by unspecif means occ oth specif place     | 5                 |
| U2zz.00   | [X]Intent self harm by unspecif means occ at unspecif place    | 5                 |
| U2z2.00   | [X]Intent self harm by unspec mean occ sch/ins/pub adm area    | 5                 |
| U27z.00   | [X]Intent self harm by smoke fire/flames occ unspecif place    | 5                 |
| U274.00   | [X]Intent self harm by smoke fire/flame occ street/highway     | 5                 |
| U291.00   | [X]Intent self harm by sharp object occ resident instit'n      | 5                 |
| U2yz.00   | [X]Intent self harm by oth specif means occ unspecif place     | 5                 |
| U2y1.00   | [X]Intent self harm by oth specif means occ resid instit'n     | 5                 |
| U2B0.00   | [X]Intent self harm by jumping from high place occ at home     | 5                 |
| U2B4.00   | [X]Intent self harm by jump from high place occ street/h'way   | 5                 |
| U211.00   | [X]Intent self harm by hangng strangult/suffoct resid instit   | 5                 |
| U21z.00   | [X]Intent self harm by hangng strangul/suffoct unspecif plce   | 5                 |
| U21y.00   | [X]Intent self harm by hangng strangul/suffoct oth spec plce   | 5                 |
| U210.00   | [X]Intent self harm by hanging strangulat/suffocat occ home    | 5                 |
| U221.00   | [X]Intent self harm by drowning/submersn occ resid instit'n    | 5                 |
| U22z.00   | [X]Intent self harm by drown/submersn occ unspecified place    | 5                 |
| U22y.00   | [X]Intent self harm by drown/submersn occ oth specif place     | 5                 |
| U2D0.00   | [X]Intent self harm by crash of motor vehicl occurrn at home   | 5                 |
| U2D4.00   | [X]Intent self harm by crash motor vehicl occ street/highway   | 5                 |
| U2A3.00   | [X]Intent self harm by blunt object occ sports/athlet area     | 5                 |
| U2A1.00   | [X]Intent self harm by blunt object occ resident instit'n      | 5                 |
| U242.00   | [X]Int slf hrm rifl s'gun/lrg frarm disch sch/ins/pub adm area | 5                 |
| U208000   | [X]Int self poison/exposure to oth/unsp drug/medicam home      | 5                 |
| U209y00   | [X]Int self poison alcohol other spec place                    | 5                 |
| U20Az00   | [X]Int self pois org solv,halogen hydrocarb, unspec place      | 5                 |
| U241.00   | [X]Int self harm rifl s'gun/lrg frarm disch occ resid instit   | 5                 |
| U2C4.00   | [X]Int self harm jump/lying befr mov obje occ street/highway   | 5                 |
| U2C1.00   | [X]Int self harm jump/lying befr mov obje occ resid instit'n   | 5                 |
| U2Cy.00   | [X]Int self harm jump/lying bef mov obje occ oth specif plce   | 5                 |
| U2Bz.00   | [X]Int self harm by jump from high place occ unspecif place    | 5                 |
| U2By.00   | [X]Int self harm by jump from high place occ oth specif plce   | 5                 |

| Read code | Description                                                  | Number of studies |
|-----------|--------------------------------------------------------------|-------------------|
| U2B6.00   | [X]Int self harm by jump from high place indust/constr area  | 5                 |
| TK5z.00   | Suicide and selfinflicted injury by firearms/explosives NOS  | 5                 |
| TK5..00   | Suicide and selfinflicted injury by firearms and explosives  | 5                 |
| TKx6.00   | Suicide and selfinflicted injury by crashing of aircraft     | 5                 |
| TK60111   | Slashed wrists self inflicted                                | 5                 |
| TK60100   | Self inflicted lacerations to wrist                          | 5                 |
| U202.13   | [X]Overdose - temazepam                                      | 4                 |
| U202.11   | [X]Overdose - sleeping tabs                                  | 4                 |
| U202.15   | [X]Overdose - nitrazepam                                     | 4                 |
| U202.12   | [X]Overdose - diazepam                                       | 4                 |
| U202.16   | [X]Overdose - benzodiazepine                                 | 4                 |
| U202.17   | [X]Overdose - barbiturate                                    | 4                 |
| U204.11   | [X]Overdose - antidepressant                                 | 4                 |
| U202.18   | [X]Overdose - amobarbital                                    | 4                 |
| U204.12   | [X]Overdose - amitriptyline                                  | 4                 |
| U204.13   | [X]Overdose - SSRI                                           | 4                 |
| U2z..00   | [X]Intentional self harm by unspecified means                | 4                 |
| U27..00   | [X]Intentional self harm by smoke, fire and flames           | 4                 |
| U29..00   | [X]Intentional self harm by sharp object                     | 4                 |
| U2y..00   | [X]Intentional self harm by other specified means            | 4                 |
| U2B..00   | [X]Intentional self harm by jumping from a high place        | 4                 |
| U26..00   | [X]Intentional self harm by explosive material               | 4                 |
| U22..00   | [X]Intentional self harm by drowning and submersion          | 4                 |
| U2D..00   | [X]Intentional self harm by crashing of motor vehicle        | 4                 |
| U2A..00   | [X]Intentional self harm by blunt object                     | 4                 |
| U200400   | [X]Intent self pois nonopioid analgesic in street/highway    | 4                 |
| U28z.00   | [X]Intent self harm by steam hot vapour/obj occ unspec place | 4                 |
| U280.00   | [X]Intent self harm by steam hot vapour/hot obj occ at home  | 4                 |
| U24..00   | [X]Intent self harm by rifle shotgun/larger firearm disch    | 4                 |
| U25..00   | [X]Intent self harm by other/unspecified firearm discharge   | 4                 |
| U2C..00   | [X]Intent self harm by jumping / lying before moving object  | 4                 |
| U21..00   | [X]Intent self harm by hanging strangulation / suffocation   | 4                 |
| U212.00   | [X]Inten slf harm hang strang/suffc sch oth ins/pub adm area | 4                 |
| U209000   | [X]Int self poison/exposure to alcohol at home               | 4                 |
| U41..00   | [X]Hanging strangulation + suffocation undetermined intent   | 4                 |
| U4Bz.00   | [X]Fall jump/push frm high plce undt intnt occ unspecif plce | 4                 |
| U720.00   | [X]Sequelae of intentional self-harm                         | 3                 |
| U2...11   | [X]Self inflicted injury                                     | 3                 |
| U44..00   | [X]Rifle shotgun+larger firearm discharge undetermin intent  | 3                 |
| U40y.00   | [X]Poisoning/exposure, ? intent, to unspecif chemical        | 3                 |
| U402.00   | [X]Poisoning/exposure, ? intent, to sedative hypnotic        | 3                 |
| U404.00   | [X]Poisoning/exposure, ? intent, to psychotropic drug        | 3                 |
| U40C.00   | [X]Poisoning/exposure, ? intent, to pesticide                | 3                 |
| U40B.00   | [X]Poisoning/exposure, ? intent, to other gas/vapour         | 3                 |
| U400.00   | [X]Poisoning/exposure, ? intent, to nonopioid analgesic      | 3                 |
| U405.00   | [X]Poisoning/exposure, ? intent, to narcotic drug            | 3                 |
| U409.00   | [X]Poisoning/exposure, ? intent, to alcohol                  | 3                 |
| U40..00   | [X]Poisoning/expos to noxious substance, undetermined intent | 3                 |
| U408.00   | [X]Poison/exposure, ?intent, to other/unspec drug/medicament | 3                 |
| U408000   | [X]Poison/exposure ?intent, to oth/unsp drug/medicam home    | 3                 |
| U409000   | [X]Poison/exposure ?intent, to alcohol at home               | 3                 |
| U40y600   | [X]Poison/expos ?intent unspec chemic indust/construct area  | 3                 |
| U200.11   | [X]Overdose - paracetamol                                    | 3                 |

| Read code | Description                                                  | Number of studies |
|-----------|--------------------------------------------------------------|-------------------|
| U200.12   | [X]Overdose - ibuprofen                                      | 3                 |
| U200.13   | [X]Overdose - aspirin                                        | 3                 |
| U45..00   | [X]Other+unspecified firearm discharge undetermined intent   | 3                 |
| U2...00   | [X]Intentional self-harm                                     | 3                 |
| U28..00   | [X]Intentional self harm by steam hot vapours / hot objects  | 3                 |
| U216.00   | [X]Intent self harm by hang strangl/suffc indust/constr area | 3                 |
| U220.00   | [X]Intent self harm by drowning/submersion occurrn at home   | 3                 |
| U206000   | [X]Int self poison/exposure to hallucinogen at home          | 3                 |
| U2...12   | [X]Injury - self-inflicted                                   | 3                 |
| U410.00   | [X]Hanging strangulat+suffocat undet intent occurrn at home  | 3                 |
| U4B..00   | [X]Falling jumping/pushed from high place undeterm intent    | 3                 |
| U30..11   | [X]Deliberate drug poisoning                                 | 3                 |
| ZX1R.00   | Throwing self in front of vehicle                            | 3                 |
| ZX1Q.00   | Throwing self in front of train                              | 3                 |
| TK53.00   | Suicide and selfinflicted injury by military firearms        | 3                 |
| TK01z00   | Suicide and self inflicted injury by barbiturates            | 3                 |
| TK2y.00   | Suicide + selfinflicted poisoning by other gases and vapours | 3                 |
| TKx0z00   | Suicide + selfinflicted inj-jump/lie before moving obj NOS   | 3                 |
| ZX1N.00   | Stabbing self                                                | 3                 |
| ZX1M.00   | Shooting self                                                | 3                 |
| ZX1K.12   | Setting self alight                                          | 3                 |
| ZX1K.11   | Setting fire to self                                         | 3                 |
| ZX1H200   | Self-suffocation                                             | 3                 |
| ZX1H100   | Self-strangulation                                           | 3                 |
| ZX1K.00   | Self-incineration                                            | 3                 |
| ZX1J.00   | Self-electrocution                                           | 3                 |
| ZX1H.00   | Self-asphyxiation                                            | 3                 |
| SL...15   | Overdose of drug                                             | 3                 |
| SL...14   | Overdose of biological substance                             | 3                 |
| TKy..00   | Late effects of selfinflicted injury                         | 3                 |
| ZX1Q.11   | Jumping under train                                          | 3                 |
| ZX1B.00   | Jumping from height                                          | 3                 |
| ZX1B300   | Jumping from cliff                                           | 3                 |
| ZX1B100   | Jumping from building                                        | 3                 |
| ZX1B200   | Jumping from bridge                                          | 3                 |
| TK...12   | Injury - self-inflicted                                      | 3                 |
| ZX18.00   | Hanging self                                                 | 3                 |
| SLHz.00   | Drug and medicament poisoning NOS                            | 3                 |
| ZX15.00   | Drowning self                                                | 3                 |
| U72..00   | [X]Sequel intentn self-harm assault+event of undeterm intent | 2                 |
| ZX1LD00   | [X]Self mutilation                                           | 2                 |
| U40y000   | [X]Poison/exposure ?intent, to unspecif chemical at home     | 2                 |
| U40C000   | [X]Poison/exposure ?intent, to pesticide at home             | 2                 |
| U40A.00   | [X]Pois/exposure,?intent,to organ solvent,halogen hydrocarb  | 2                 |
| U40y400   | [X]Pois/expos ?intent unspecif chemical in street/highway    | 2                 |
| U40yz00   | [X]Pois/expos ?intent to unspecif chemical unspecif place    | 2                 |
| U402z00   | [X]Pois/expos ?intent to sedative hypnotic unspecif place    | 2                 |
| U408z00   | [X]Pois/expos ?intent to oth/unsp drug/medic unspecif place  | 2                 |
| U409z00   | [X]Pois/expos ?intent to alcohol unspecif place              | 2                 |
| U40B400   | [X]Pois/expos ?intent other gas/vapour in street/highway     | 2                 |
| U409400   | [X]Pois/expos ?intent alcohol in street/highway              | 2                 |
| U406y00   | [X]Pois/exp ?intent to hallucinogen other spec place         | 2                 |
| U404300   | [X]Pois/exp ?intent psychotropic drug in sport/athletic area | 2                 |

| Read code | Description                                                  | Number of studies |
|-----------|--------------------------------------------------------------|-------------------|
| U40A300   | [X]Pois/exp ?intent org solvent,halogen hydrocarb,sport area | 2                 |
| U409200   | [X]Pois/exp ?intent alcohol school/pub admin area            | 2                 |
| U205.11   | [X]Overdose - heroin                                         | 2                 |
| U2Az.00   | [X]Intentional self harm by blunt object occ unspecif place  | 2                 |
| U206z00   | [X]Intent self poison hallucinogen unspecif place            | 2                 |
| U209400   | [X]Intent self pois alcohol in street/highway                | 2                 |
| U292.00   | [X]Intent self harm sharp obj occ sch oth ins/pub adm area   | 2                 |
| U2yy.00   | [X]Intent self harm oth specif means occ oth specif place    | 2                 |
| U2y6.00   | [X]Intent self harm oth specif means occ indust/constr area  | 2                 |
| U2z1.00   | [X]Intent self harm by unspecif means occurrn resid instit'n | 2                 |
| U27y.00   | [X]Intent self harm by smoke fire/flame occ oth specif plce  | 2                 |
| U295.00   | [X]Intent self harm by sharp object occ trade/service area   | 2                 |
| U296.00   | [X]Intent self harm by sharp object occ indust/constr area   | 2                 |
| U2B1.00   | [X]Intent self harm by jump from high place occ resid instit | 2                 |
| U213.00   | [X]Intent self harm by hang strangl/suffc sport/athlet area  | 2                 |
| U2Dz.00   | [X]Intent self harm by crash motor vehic occ unspecif place  | 2                 |
| U2A2.00   | [X]Intent self harm blunt obj occ sch oth ins/pub adm area   | 2                 |
| U20Ay00   | [X]Int self pois org solv,halogen hydrocarb,oth spec place   | 2                 |
| U200600   | [X]Int self pois nonopioid analgesic indust/construct area   | 2                 |
| U282.00   | [X]Int self harm by steam hot vapor/obj sch/ins/pub adm area | 2                 |
| U4C..00   | [X]Falling lying running befor/into moving obj undet intent  | 2                 |
| U4B6.00   | [X]Fall jump/push frm high plce undt intr indust/constr area | 2                 |
| U47..00   | [X]Exposure to smoke, fire and flames, undetermined intent   | 2                 |
| U470.00   | [X]Exposure to smoke fire+flame undeterm intent occ at home  | 2                 |
| U42..00   | [X]Drowning and submersion, undetermined intent              | 2                 |
| U4D7.00   | [X]Crashng of motor vehicle undetermined intent occ on farm  | 2                 |
| U4D0.00   | [X]Crashng of motor vehicle undetermined intent occ at home  | 2                 |
| U4D..00   | [X]Crashing of motor vehicle, undetermined intent            | 2                 |
| U4D3.00   | [X]Crash of motor vehicle undeterm intent sport/athlet area  | 2                 |
| U4A5.00   | [X]Contct wth blunt obj undet intent occ trade/service area  | 2                 |
| U4A3.00   | [X]Contct wth blunt obj undet intent occ sport/athletic area | 2                 |
| U4A0.00   | [X]Contact wth blunt object undetermined intent occ at home  | 2                 |
| U48..00   | [X]Contact with steam hot vapours+objects undetermn intent   | 2                 |
| U49..00   | [X]Contact with sharp object, undetermined intent            | 2                 |
| U49z.00   | [X]Contact with sharp obj undeterm intent occ unspecif place | 2                 |
| U4A..00   | [X]Contact with blunt object, undetermined intent            | 2                 |
| U4Az.00   | [X]Contact with blunt obj undeterm intent occ unspecif place | 2                 |
| ZX1S.00   | Throwing self onto floor                                     | 2                 |
| 1BDA.00   | Thoughts of deliberate self harm                             | 2                 |
| 1BD3.00   | Suicidal plans                                               | 2                 |
| 1BD1.00   | Suicidal ideation                                            | 2                 |
| 1B19.11   | Suicidal - symptom                                           | 2                 |
| 1B19.00   | Suicidal                                                     | 2                 |
| ZX19200   | Slapping self                                                | 2                 |
| ZX1I.00   | Self-scalding                                                | 2                 |
| ZX1L300   | Self-mutilation of penis                                     | 2                 |
| ZX1L100   | Self-mutilation of hands                                     | 2                 |
| ZX1L200   | Self-mutilation of genitalia                                 | 2                 |
| ZX1L600   | Self-mutilation of ears                                      | 2                 |
| ZX1L.00   | Self-mutilation                                              | 2                 |
| ZX1G.00   | Scratches self                                               | 2                 |
| ZX19100   | Punching self                                                | 2                 |
| TN...11   | Poisoning undetermined - accidentally or purposely inflicted | 2                 |



| Read code | Description                                                  | Number of studies |
|-----------|--------------------------------------------------------------|-------------------|
| ZX1E.00   | Pinching self                                                | 2                 |
| ZX1C.00   | Nipping self                                                 | 2                 |
| 14K1.00   | Intentional overdose of prescription only medication         | 2                 |
| TN0..00   | Injury ?accidental, poisoning by solid/liquid substances     | 2                 |
| TN0z.00   | Injury ?accidental, poisoning by solid or liquid subst NOS   | 2                 |
| TN2y.00   | Injury ?accidental, poisoning by other spec gas or vapour    | 2                 |
| TN04.00   | Injury ?accidental, poisoning by other spec drug/medicament  | 2                 |
| TN02.00   | Injury ?accidental, poisoning by other sedative/hypnotic     | 2                 |
| TN2..00   | Injury ?accidental, poisoning by other gases                 | 2                 |
| TN21.00   | Injury ?accidental, poisoning by other carbon monoxide       | 2                 |
| TN20.00   | Injury ?accidental, poisoning by motor vehicle exhaust gas   | 2                 |
| TN11.00   | Injury ?accidental, poisoning by liquid petrol gas           | 2                 |
| TN1..00   | Injury ?accidental, poisoning by gases in domestic use       | 2                 |
| TN1z.00   | Injury ?accidental, poisoning by gas in domestic use NOS     | 2                 |
| TN10.00   | Injury ?accidental, poisoning by gas distributed by pipeline | 2                 |
| TN05.00   | Injury ?accidental, poisoning by drug or medicament NOS      | 2                 |
| TN06.00   | Injury ?accidental, poisoning by corrosive/caustic substance | 2                 |
| TN08.00   | Injury ?accidental, poisoning by arsenic or its compounds    | 2                 |
| TN00.00   | Injury ?accidental, poisoning by analgesic or anti-pyretic   | 2                 |
| TN07.00   | Injury ?accidental, poisoning by agricultural chemicals      | 2                 |
| TN3..00   | Injury ?accidental, hanging, strangulation and suffocation   | 2                 |
| TN30.00   | Injury ?accidental, hanging                                  | 2                 |
| TN01300   | Injury ?accidental poisoning by Pentobarbitone               | 2                 |
| ZRLfC12   | HoNOS item 2 - non-accidental self injury                    | 2                 |
| ZX19.00   | Hitting self                                                 | 2                 |
| ZX13.00   | Cutting self                                                 | 2                 |
| ZX13.11   | Cuts self                                                    | 2                 |
| ZX12.00   | Burning self                                                 | 2                 |
| ZX11.00   | Biting self                                                  | 2                 |
| ZX11.11   | Bites self                                                   | 2                 |
| SL90.00   | Antidepressant poisoning                                     | 2                 |
| 8G6Z.00   | Anti-suicide psychotherapy NOS                               | 2                 |
| 8G6..00   | Anti-suicide psychotherapy                                   | 2                 |
| SL90z00   | Anti-depressant poisoning NOS                                | 2                 |
| U4z..00   | [X]Unspecified event, undetermined intent                    | 1                 |
| U4zz.00   | [X]Unspecif event undeterm intent occurrn unspecif place     | 1                 |
| U4z3.00   | [X]Unspecif event undeterm intent occurrn sport/athlet area  | 1                 |
| U4zy.00   | [X]Unspecif event undeterm intent occurrn oth specif place   | 1                 |
| U4z6.00   | [X]Unspecif event undeterm intent occurrn indust/constr area | 1                 |
| SyuG.00   | [X]Toxic effects of substances chiefly nonmedicinal source   | 1                 |
| SyuG700   | [X]Toxic effects of other specified gases, fumes & vapours   | 1                 |
| SyuGH00   | [X]Toxic effect of paints and dyes, NEC                      | 1                 |
| SyuGJ00   | [X]Toxic effect of other specified substances                | 1                 |
| SyuG900   | [X]Toxic effect of other pesticides                          | 1                 |
| SyuG800   | [X]Toxic effect of other insecticides                        | 1                 |
| SyuGC00   | [X]Toxic effect of other ingested (parts of) plant(s)        | 1                 |
| SyuG000   | [X]Toxic effect of other alcohols                            | 1                 |
| U2E..00   | [X]Self mutilation                                           | 1                 |
| U406.00   | [X]Poisoning/exposure, ? intent, to hallucinogen             | 1                 |
| SyuFM00   | [X]Poisoning by other psychotropic drugs, NEC                | 1                 |
| SyuFB00   | [X]Poisoning by other opioids                                | 1                 |
| SyuFW00   | [X]Poisoning by other laxatives, incl intestin atonia drugs  | 1                 |
| SyuFT00   | [X]Poisoning by other antihypertensive drugs, NEC            | 1                 |

| Read code | Description                                                  | Number of studies |
|-----------|--------------------------------------------------------------|-------------------|
| SyuFD00   | [X]Poisoning by other and unspecified narcotics              | 1                 |
| SyuFA00   | [X]Poisoning by other analgesics, not elsewhere classified   | 1                 |
| SyuF900   | [X]Poisoning by oth nonsteroidal anti-inflamm drugs [NSAID]  | 1                 |
| SyuFc00   | [X]Poisoning by oth & unspecif drugs & biologic substances   | 1                 |
| SyuF.00   | [X]Poisoning by drugs and biological substances              | 1                 |
| U40Bz00   | [X]Pois/expos ?intent to other gas/vapour unspecif place     | 1                 |
| U409100   | [X]Pois/expos ?intent to alcohol at res institut             | 1                 |
| U408400   | [X]Pois/expos ?intent oth/unsp drug/medic in street/highway  | 1                 |
| U40yy00   | [X]Pois/exp ?intent to unspecif chemical other spec place    | 1                 |
| U40By00   | [X]Pois/exp ?intent to other gas/vapour other spec place     | 1                 |
| U202.14   | [X]Overdose - flurazepam                                     | 1                 |
| U4y..00   | [X]Other specified events, undetermined intent               | 1                 |
| U4y0.00   | [X]Other specified event undetermind intent occurrn at home  | 1                 |
| U4y3.00   | [X]Oth specif event undetermin intent occ sport/athlet area  | 1                 |
| Eu15000   | [X]Mnt/beh dis due oth stim inc caffein: acute intoxication  | 1                 |
| Eu18000   | [X]Mental & behav dis due vol solvents: acute intoxication   | 1                 |
| Eu17000   | [X]Mental & behav dis due to use tobacco: acute intoxication | 1                 |
| Eu11000   | [X]Mental & behav dis due to use opioids: acute intoxication | 1                 |
| Eu14000   | [X]Mental & behav dis due to use cocaine: acute intoxication | 1                 |
| Eu10000   | [X]Mental & behav dis due to use alcohol: acute intoxication | 1                 |
| Eu13000   | [X]Mental & behav dis due sed/hypntcs: acute intoxication    | 1                 |
| Eu16000   | [X]Mental & behav dis due hallucinogens: acute intoxicatn    | 1                 |
| Eu12000   | [X]Mental & behav dis due cannabinoids: acute intoxication   | 1                 |
| Eu1A000   | [X]Ment behav dis due use crack cocaine: acute intoxication  | 1                 |
| U39..11   | [X]Intentionally shot with shotgun                           | 1                 |
| U38..11   | [X]Intentionally shot with handgun                           | 1                 |
| U41z.00   | [X]Hangng strangult+suffoct undet intent occ unspecif place  | 1                 |
| U4B0.00   | [X]Fallng jumpng/push frm high place undet intent occ home   | 1                 |
| U81..00   | [X]Evid of alcohol involv determind by level of intoxication | 1                 |
| U4D1.00   | [X]Crashng of motor vehicle undeterm intent resident instit  | 1                 |
| U466.00   | [X]Contct wth explosiv materl undet intnt indust/constr area | 1                 |
| U4A6.00   | [X]Contct wth blunt obj undet intent occ industr/constr area | 1                 |
| U46..00   | [X]Contact with explosive material, undetermined intent      | 1                 |
| U4Ay.00   | [X]Contact with blunt obj undeter intent occ oth specif plce | 1                 |
| U1AC.11   | [X]Accidental poisoning with weedkiller                      | 1                 |
| U1A2.13   | [X]Accidental poisoning with temazepam                       | 1                 |
| U1A2.11   | [X]Accidental poisoning with sleeping tablets                | 1                 |
| U1AC.12   | [X]Accidental poisoning with paraquat                        | 1                 |
| U1A0.11   | [X]Accidental poisoning with paracetamol                     | 1                 |
| U1A2.15   | [X]Accidental poisoning with nitrazepam                      | 1                 |
| U1A0.12   | [X]Accidental poisoning with ibuprofen                       | 1                 |
| U1A5.11   | [X]Accidental poisoning with heroin                          | 1                 |
| U1A2.12   | [X]Accidental poisoning with diazepam                        | 1                 |
| U1A2.16   | [X]Accidental poisoning with benzodiazepine                  | 1                 |
| U1A2.17   | [X]Accidental poisoning with barbiturate                     | 1                 |
| U1A0.13   | [X]Accidental poisoning with aspirin                         | 1                 |
| U1A4.11   | [X]Accidental poisoning with antidepressant                  | 1                 |
| U1A4.12   | [X]Accidental poisoning with amitriptyline                   | 1                 |
| U1A4.13   | [X]Accidental poisoning with SSRI                            | 1                 |
| U1AA.11   | [X]Accidental poisoning from glue solvent                    | 1                 |
| U1AD.00   | [X]Accidental poisoning by and exposure to amfetamine        | 1                 |
| U1A..00   | [X]Accidental poisoning by + exposure to noxious substances  | 1                 |
| U1A..12   | [X]Accidental drug overdose / other poisoning                | 1                 |

| Read code | Description                                                  | Number of studies |
|-----------|--------------------------------------------------------------|-------------------|
| U1A..11   | [X]Accidental drug / other poisoning                         | 1                 |
| U1AB.11   | [X]Accidental carbon monoxide poisoning                      | 1                 |
| U1Ay.00   | [X]Accident poisoning/exposure to unspecif chemical          | 1                 |
| U1A2.00   | [X]Accident poisoning/exposure to sedative hypnotic          | 1                 |
| U1A4.00   | [X]Accident poisoning/exposure to psychotropic drug          | 1                 |
| U1AC.00   | [X]Accident poisoning/exposure to pesticide                  | 1                 |
| U1AB.00   | [X]Accident poisoning/exposure to other gas/vapour           | 1                 |
| U1A7.00   | [X]Accident poisoning/exposure to oth autonomic drug         | 1                 |
| U1A0.00   | [X]Accident poisoning/exposure to nonopioid analgesic        | 1                 |
| U1A5.00   | [X]Accident poisoning/exposure to narcotic drug              | 1                 |
| U1A6.00   | [X]Accident poisoning/exposure to hallucinogen               | 1                 |
| U1A3.00   | [X]Accident poisoning/exposure to antiparkinson drug         | 1                 |
| U1A1.00   | [X]Accident poisoning/exposure to antiepileptic              | 1                 |
| U1A9.00   | [X]Accident poisoning/exposure to alcohol                    | 1                 |
| U1AD000   | [X]Accident poisoning by and exposure to amphetamine - home  | 1                 |
| U1Ay700   | [X]Accident poison/exposure to unspecif chemical on farm     | 1                 |
| U1Ay000   | [X]Accident poison/exposure to unspecif chemical at home     | 1                 |
| U1A2000   | [X]Accident poison/exposure to sedative hypnotic at home     | 1                 |
| U1A4000   | [X]Accident poison/exposure to psychotropic drug at home     | 1                 |
| U1AC700   | [X]Accident poison/exposure to pesticide on farm             | 1                 |
| U1AC000   | [X]Accident poison/exposure to pesticide at home             | 1                 |
| U1A8.00   | [X]Accident poison/exposure to other/unspec drug/medicament  | 1                 |
| U1AB700   | [X]Accident poison/exposure to other gas/vapour on farm      | 1                 |
| U1AB000   | [X]Accident poison/exposure to other gas/vapour at home      | 1                 |
| U1A8000   | [X]Accident poison/exposure to oth/unsp drug/medicam home    | 1                 |
| U1A7000   | [X]Accident poison/exposure to oth autonomic drug at home    | 1                 |
| U1A0000   | [X]Accident poison/exposure to nonopioid analgesic at home   | 1                 |
| U1A5000   | [X]Accident poison/exposure to narcotic drug at home         | 1                 |
| U1A1000   | [X]Accident poison/exposure to antiepileptic at home         | 1                 |
| U1A9000   | [X]Accident poison/exposure to alcohol at home               | 1                 |
| U1AA.00   | [X]Accid poison/exposure to organ solvent,halogen hydrocarb  | 1                 |
| U1Ay500   | [X]Accid poison/expos unspecif chemical trade/service area   | 1                 |
| U1Ayz00   | [X]Accid poison/expos to unspecif chemical unspecif place    | 1                 |
| U1Ay100   | [X]Accid poison/expos to unspecif chemical at res institut   | 1                 |
| U1A2z00   | [X]Accid poison/expos to sedative hypnotic unspecif place    | 1                 |
| U1A4100   | [X]Accid poison/expos to psychotropic drug at res institut   | 1                 |
| U1ABz00   | [X]Accid poison/expos to other gas/vapour unspecif place     | 1                 |
| U1A8100   | [X]Accid poison/expos to oth/unsp drug/medicam res institut  | 1                 |
| U1A8z00   | [X]Accid poison/expos to oth/unsp drug/medic unspecif place  | 1                 |
| U1A7z00   | [X]Accid poison/expos to oth autonomic drug unspecif place   | 1                 |
| U1A0z00   | [X]Accid poison/expos to nonopioid analgesic unspecif place  | 1                 |
| U1A5z00   | [X]Accid poison/expos to narcotic drug unspecif place        | 1                 |
| U1A9z00   | [X]Accid poison/expos to alcohol unspecif place              | 1                 |
| U1AA000   | [X]Accid poison/expos organ solvent,halogen hydrocarb, home  | 1                 |
| U1A3500   | [X]Accid poison/expos antiparkinson drug trade/service area  | 1                 |
| U1A9500   | [X]Accid poison/expos alcohol trade/service area             | 1                 |
| U1A9400   | [X]Accid poison/expos alcohol in street/highway              | 1                 |
| U1Ay200   | [X]Acc poison/expos unspecif chemical school/pub admin area  | 1                 |
| U1A4200   | [X]Acc poison/expos psychotropic drug school/pub admin area  | 1                 |
| U1AA100   | [X]Acc poison/expos org solvent,halogen hydrocarb,res instit | 1                 |
| U1A9200   | [X]Acc poison/expos alcohol school/pub admin area            | 1                 |
| U1ADz00   | [X]Acc poison by and exposure to amphetamine - unspec places | 1                 |
| Sy...00   | [X] Injury and poisoning classification terms                | 1                 |

| Read code | Description                                               | Number of studies |
|-----------|-----------------------------------------------------------|-------------------|
| U60F412   | [X] Adverse reaction to acetylcysteine                    | 1                 |
| ZV15600   | [V]Personal history of poisoning                          | 1                 |
| ZV4C400   | [V]Occupational exposure to toxic agents in agriculture   | 1                 |
| ZV71A00   | [V]Obs for suspected toxic effect from ingested substance | 1                 |
| SLC7100   | Zinc salt poisoning                                       | 1                 |
| SM01100   | Wood alcohol causing toxic effect                         | 1                 |
| SLEz.00   | Water, mineral or uric acid metabolism poisoning NOS      | 1                 |
| SLE..00   | Water, mineral and urate metabolism poisoning             | 1                 |
| SL42300   | Warfarin sodium poisoning                                 | 1                 |
| SL42400   | Warfarin poisoning                                        | 1                 |
| SL35z00   | Vitamin poisoning NOS                                     | 1                 |
| SL35.00   | Vitamin poisoning NEC                                     | 1                 |
| SL35100   | Vitamin D poisoning                                       | 1                 |
| SL35000   | Vitamin A poisoning                                       | 1                 |
| SL44300   | Urokinase poisoning                                       | 1                 |
| SLE7.00   | Uric acid drug poisoning                                  | 1                 |
| SLE7.11   | Urate metabolism drug poisoning                           | 1                 |
| SM9z.00   | Unspecified substance causing toxic effect NOS            | 1                 |
| SL50000   | Unspecified opium poisoning                               | 1                 |
| SL30400   | Tripelennamine poisoning                                  | 1                 |
| SL60100   | Trimethadione poisoning                                   | 1                 |
| SL92200   | Trifluoperidol poisoning                                  | 1                 |
| SM23100   | Trichloroethylene causing toxic effect                    | 1                 |
| SL90300   | Trazodone poisoning                                       | 1                 |
| SL95z00   | Tranquilliser poisoning NOS                               | 1                 |
| SL9..11   | Tranquilliser poisoning                                   | 1                 |
| TE57.00   | Toxic reactions caused by other plants                    | 1                 |
| F036200   | Toxic encephalitis due to thallium                        | 1                 |
| F036100   | Toxic encephalitis due to mercury                         | 1                 |
| F036000   | Toxic encephalitis due to lead                            | 1                 |
| SMC..00   | Toxic effect of tobacco and nicotine                      | 1                 |
| SM57.00   | Toxic effect of tin and its compounds                     | 1                 |
| SM9A.00   | Toxic effect of rodenticides                              | 1                 |
| SMX..00   | Toxic effect of paints and dyes, NEC                      | 1                 |
| SM9X.00   | Toxic effect of nitroglycerin & oth nitric acids & ester  | 1                 |
| SM79.00   | Toxic effect of hydrogen sulfide                          | 1                 |
| SM15.00   | Toxic effect of homologues of benzene                     | 1                 |
| SM98.00   | Toxic effect of herbicides and fungicides                 | 1                 |
| SMB..00   | Toxic effect of formaldehyde                              | 1                 |
| SM78.00   | Toxic effect of fluorine gas and hydrogen fluoride        | 1                 |
| SM23200   | Toxic effect of chloroform                                | 1                 |
| SM7A.00   | Toxic effect of carbon dioxide                            | 1                 |
| SLG7.00   | Topical dental drug poisoning                             | 1                 |
| SL85.00   | Topical and infiltration anaesthetic agent poisoning      | 1                 |
| SL16200   | Tiabendazole poisoning                                    | 1                 |
| SL27.00   | Thyroid hormone and thyroid derivatives poisoning         | 1                 |
| SL27z00   | Thyroid hormone and thyroid derivative poisoning NOS      | 1                 |
| SL27300   | Thyroglobulin poisoning                                   | 1                 |
| SL91400   | Thioridazine poisoning                                    | 1                 |
| SLE1100   | Theophylline poisoning                                    | 1                 |
| SL04000   | Tetracycline poisoning                                    | 1                 |
| SL04z00   | Tetracycline group poisoning NOS                          | 1                 |
| SL04.00   | Tetracycline group poisoning                              | 1                 |

| Read code | Description                                           | Number of studies |
|-----------|-------------------------------------------------------|-------------------|
| SM23000   | Tetrachloroethylene causing toxic effect              | 1                 |
| SL85300   | Tetracaine poisoning                                  | 1                 |
| SL21300   | Testosterone poisoning                                | 1                 |
| SLF5200   | Terpin hydrate poisoning                              | 1                 |
| SL3z.00   | Systemic agent poisoning NOS                          | 1                 |
| SLB2.00   | Sympathomimetic poisoning                             | 1                 |
| SM31200   | Sulphuric acid causing toxic effect                   | 1                 |
| SM73.00   | Sulphur dioxide causing toxic effect                  | 1                 |
| SL1x400   | Sulphone poisoning                                    | 1                 |
| SL10.00   | Sulphonamide poisoning                                | 1                 |
| SL10200   | Sulfamethoxazole poisoning                            | 1                 |
| SL10000   | Sulfadiazine poisoning                                | 1                 |
| 1BD4.00   | Suicide risk                                          | 1                 |
| ZRn3.00   | Suicide intent score subscale - attempt circumstances | 1                 |
| SN47100   | Suffocation by strangulation                          | 1                 |
| SL06300   | Streptomycin poisoning                                | 1                 |
| SL44200   | Streptokinase poisoning                               | 1                 |
| SL97.11   | Stimulant poisoning                                   | 1                 |
| SM2z.00   | Solvents causing toxic effect NOS                     | 1                 |
| SLC7000   | Sodium morrhuate poisoning                            | 1                 |
| SM32200   | Sodium hydroxide causing toxic effect                 | 1                 |
| SM90100   | Sodium cyanide causing toxic effect                   | 1                 |
| SM96.00   | Soap and detergent causing toxic effect               | 1                 |
| SM96.12   | Soap - toxic effect                                   | 1                 |
| SLF1.00   | Smooth muscle relaxant poisoning                      | 1                 |
| SL7z.11   | Sleeping drug poisoning                               | 1                 |
| SLF2.00   | Skeletal muscle relaxant poisoning                    | 1                 |
| ZX1..00   | Self-injurious behaviour                              | 1                 |
| ZX...00   | Self-harm                                             | 1                 |
| ZX...11   | Self-damage                                           | 1                 |
| SL7..12   | Sedative poisoning                                    | 1                 |
| SL7z.00   | Sedative and hypnotic drug poisoning NOS              | 1                 |
| SL7..00   | Sedative and hypnotic drug poisoning                  | 1                 |
| SL70500   | Secobarbital poisoning                                | 1                 |
| SL51100   | Salicylic acid salt poisoning                         | 1                 |
| SL51z00   | Salicylate poisoning NOS                              | 1                 |
| SL51.00   | Salicylate poisoning                                  | 1                 |
| SLF7100   | Salbutamol poisoning                                  | 1                 |
| ZX1..12   | SIB - Self-injurious behaviour                        | 1                 |
| SM02200   | Rubbing alcohol causing toxic effect                  | 1                 |
| SL06200   | Rifampicin poisoning                                  | 1                 |
| SLF..12   | Respiratory system drug poisoning                     | 1                 |
| SL14500   | Quinine poisoning                                     | 1                 |
| SLC0300   | Quinidine poisoning                                   | 1                 |
| SL14400   | Pyrimethamine poisoning                               | 1                 |
| SL53.00   | Pyrazole derivative poisoning                         | 1                 |
| SL9z.00   | Psychotropic agent poisoning NOS                      | 1                 |
| SL9..00   | Psychotropic agent poisoning                          | 1                 |
| SL97.00   | Psychostimulant poisoning                             | 1                 |
| SL96400   | Psilocybin poisoning                                  | 1                 |
| SL45100   | Protamine sulphate poisoning                          | 1                 |
| SLF0200   | Prostaglandin poisoning                               | 1                 |
| SLC0200   | Propranolol poisoning                                 | 1                 |

| Read code | Description                                                | Number of studies |
|-----------|------------------------------------------------------------|-------------------|
| SM70100   | Propane causing toxic effect                               | 1                 |
| SL91300   | Promazine poisoning                                        | 1                 |
| SL14300   | Proguanil poisoning                                        | 1                 |
| SL22300   | Progestogen poisoning                                      | 1                 |
| SL91200   | Prochlorperazine poisoning                                 | 1                 |
| SLC0100   | Procainamide poisoning                                     | 1                 |
| SL6x000   | Primidone poisoning                                        | 1                 |
| 8G61.00   | Potential suicide care                                     | 1                 |
| SM32100   | Potassium hydroxide causing toxic effect                   | 1                 |
| SM90000   | Potassium cyanide causing toxic effect                     | 1                 |
| SL25.00   | Posterior pituitary hormone poisoning                      | 1                 |
| SL94600   | Poisoning by temazepam                                     | 1                 |
| SLD3100   | Poisoning by saline and osmotic laxatives                  | 1                 |
| SL3..00   | Poisoning by primarily systemic agents                     | 1                 |
| SLX..00   | Poisoning by oth & unspec antipsychotics & neuroleptics    | 1                 |
| SL29.00   | Poisoning by mineralocorticoids and their antagonists      | 1                 |
| SLD0200   | Poisoning by histamine H2-receptor antagonists             | 1                 |
| SL20300   | Poisoning by glucocorticoids and synthetic analogues       | 1                 |
| SL...16   | Poisoning by drug and biological substances                | 1                 |
| SL6x100   | Poisoning by carbamazepine                                 | 1                 |
| SLC9.00   | Poisoning by calcium-channel blockers                      | 1                 |
| SLC6400   | Poisoning by angiotensin-converting-enzyme inhibitors      | 1                 |
| SL...00   | Poisoning                                                  | 1                 |
| SM82.12   | Plants - toxic effect                                      | 1                 |
| 1BDB.00   | Plans for deliberate self harm without intent              | 1                 |
| SL16100   | Piperazine poisoning                                       | 1                 |
| SLB0200   | Pilocarpine poisoning                                      | 1                 |
| SM7y000   | Phosgene causing toxic effect                              | 1                 |
| SM93500   | Phosdrin causing toxic effect                              | 1                 |
| SL61000   | Phenytoin poisoning                                        | 1                 |
| SL53100   | Phenylbutazone poisoning                                   | 1                 |
| SLB3000   | Phenoxybenzamine poisoning                                 | 1                 |
| SL91z00   | Phenothiazine poisoning NOS                                | 1                 |
| SL91.00   | Phenothiazine poisoning                                    | 1                 |
| SLD1200   | Phenolphthalein poisoning                                  | 1                 |
| SM30000   | Phenol causing toxic effect                                | 1                 |
| SL70400   | Phenobarbital poisoning                                    | 1                 |
| SL42200   | Phenindione poisoning                                      | 1                 |
| SL52200   | Phenacetin poisoning                                       | 1                 |
| SLH4.00   | Pharmaceutical excipient poisoning                         | 1                 |
| SM1z.00   | Petroleum product causing toxic effect NOS                 | 1                 |
| SM1..00   | Petroleum product causing toxic effect                     | 1                 |
| SM14.00   | Petroleum ether causing toxic effect                       | 1                 |
| SM10.00   | Petrol unspecified causing toxic effect                    | 1                 |
| SL86.00   | Peripheral nerve and plexus-blocking anaesthetic poisoning | 1                 |
| SL70300   | Pentobarbitone poisoning                                   | 1                 |
| SL34000   | Penicillinase poisoning                                    | 1                 |
| SL00z00   | Penicillin poisoning NOS                                   | 1                 |
| SL00.00   | Penicillin poisoning                                       | 1                 |
| SL00300   | Penicillin G poisoning                                     | 1                 |
| E022.00   | Pathological drug intoxication                             | 1                 |
| E014.00   | Pathological alcohol intoxication                          | 1                 |
| SM93300   | Parathion causing toxic effect                             | 1                 |

| Read code | Description                                                | Number of studies |
|-----------|------------------------------------------------------------|-------------------|
| SLB0.00   | Parasympathomimetic poisoning                              | 1                 |
| SL60000   | Paramethadione poisoning                                   | 1                 |
| SM13.00   | Paraffin wax causing toxic effect                          | 1                 |
| SL52100   | Paracetamol poisoning                                      | 1                 |
| SL1x300   | Para-aminosalicylic acid poisoning                         | 1                 |
| SLC5200   | Papaverine poisoning                                       | 1                 |
| SLD4100   | Papain poisoning                                           | 1                 |
| SLD4000   | Pancreatin poisoning                                       | 1                 |
| SL04300   | Oxytetracycline poisoning                                  | 1                 |
| SL21200   | Oxymetholone poisoning                                     | 1                 |
| SL22z00   | Ovarian hormone poisoning NOS                              | 1                 |
| SL22.00   | Ovarian hormone and synthetic substitute poisoning         | 1                 |
| SLC5.00   | Other vasodilator poisoning                                | 1                 |
| SL95.00   | Other tranquilliser poisoning                              | 1                 |
| F377.00   | Other toxic agent polyneuropathy                           | 1                 |
| SL3y.00   | Other systemic agent poisoning                             | 1                 |
| SM9y.00   | Other substance causing toxic effect                       | 1                 |
| SL0y.00   | Other specific antibiotic poisoning                        | 1                 |
| SM2yz00   | Other solvents causing toxic effect NOS                    | 1                 |
| SM2..00   | Other solvents causing toxic effect                        | 1                 |
| SM2y.00   | Other solvents causing toxic effect                        | 1                 |
| SLGx.00   | Other skin and mucous membrane drug poisoning              | 1                 |
| SL7y.00   | Other sedative and hypnotic poisoning                      | 1                 |
| SLFy.00   | Other respiratory system drug poisoning                    | 1                 |
| SL9y.00   | Other psychotropic agent poisoning                         | 1                 |
| SM94.00   | Other pesticides causing toxic effect NEC                  | 1                 |
| SM8y.00   | Other noxious substance eaten as food causing toxic effect | 1                 |
| SM9..00   | Other nonmedicinal substances causing toxic effect         | 1                 |
| SL5x.00   | Other non-narcotic analgesic poisoning                     | 1                 |
| SLF3.00   | Other muscle drug poisoning                                | 1                 |
| SLE6.00   | Other mineral salt poisoning NEC                           | 1                 |
| SM5y.00   | Other metals causing toxic effect OS                       | 1                 |
| SM5yz00   | Other metals causing toxic effect NOS                      | 1                 |
| SM5..00   | Other metals causing toxic effect                          | 1                 |
| SLC6.00   | Other hypertensive agent poisoning                         | 1                 |
| SM71.00   | Other hydrocarbon gas causing toxic effect                 | 1                 |
| SL2y.00   | Other hormone or synthetic derivative poisoning            | 1                 |
| SLDy.00   | Other gastrointestinal agent poisoning                     | 1                 |
| SM7..00   | Other gases, fumes or vapours causing toxic effect         | 1                 |
| SM7y.00   | Other gas, fume or vapour causing toxic effect             | 1                 |
| SM7yz00   | Other gas, fume and vapour causing toxic effect NOS        | 1                 |
| SLHy.00   | Other drug and medicament poisoning OS                     | 1                 |
| SLHyz00   | Other drug and medicament poisoning NOS                    | 1                 |
| SLE4z00   | Other diuretic poisoning NOS                               | 1                 |
| SLC1100   | Other digitalis glycoside poisoning                        | 1                 |
| SLAy.00   | Other central nervous system stimulant poisoning           | 1                 |
| SLD3.00   | Other cathartic poisoning                                  | 1                 |
| SL93.00   | Other antipsychotics/neuroleptics/tranquilliser poisoning  | 1                 |
| SL15.00   | Other antiprotozoal drug poisoning                         | 1                 |
| SL30x00   | Other antihistamine poisoning                              | 1                 |
| SL6x.00   | Other anticonvulsant poisoning                             | 1                 |
| SL1..00   | Other anti-infective poisoning                             | 1                 |
| SL1y.00   | Other anti-infective poisoning                             | 1                 |

| Read code | Description                                              | Number of studies |
|-----------|----------------------------------------------------------|-------------------|
| SLH..00   | Other and unspecified drug and medicament poisoning      | 1                 |
| SL5yz00   | Other analgesic or antipyretic poisoning NOS             | 1                 |
| SL5y.00   | Other analgesic and antipyretic poisoning                | 1                 |
| SM0y.00   | Other alcohol causing toxic effect                       | 1                 |
| SM93z00   | Organophosphate and carbamate causing toxic effect NOS   | 1                 |
| SM93.00   | Organophosphate and carbamate causing toxic effect       | 1                 |
| SLF1100   | Orciprenaline poisoning                                  | 1                 |
| SL22000   | Oral contraceptive poisoning                             | 1                 |
| SL50.12   | Opiate poisoning                                         | 1                 |
| SL50z00   | Opiate or narcotic poisoning NOS                         | 1                 |
| SLA1z00   | Opiate antagonist poisoning NOS                          | 1                 |
| SLA1.00   | Opiate antagonist poisoning                              | 1                 |
| SL50.00   | Opiate and narcotic poisoning                            | 1                 |
| SL03100   | Oleandomycin poisoning                                   | 1                 |
| SL22100   | Oestrogen poisoning                                      | 1                 |
| SL01200   | Nystatin poisoning                                       | 1                 |
| SM8z.00   | Noxious substance eaten as food causing toxic effect NOS | 1                 |
| SM8..00   | Noxious substance eaten as food causing toxic effect     | 1                 |
| SLB2100   | Noradrenalin poisoning                                   | 1                 |
| SM...00   | Nonmedicinal agent causing toxic effects                 | 1                 |
| SL5xz00   | Non-narcotic analgesic poisoning NOS                     | 1                 |
| SMz..00   | Non-medicinal agent causing toxic effect NOS             | 1                 |
| SL82100   | Nitrous oxide poisoning                                  | 1                 |
| SM72.00   | Nitrogen oxides causing toxic effect                     | 1                 |
| SM72000   | Nitrogen dioxide causing toxic effect                    | 1                 |
| SL1y100   | Nitrofurantoin poisoning                                 | 1                 |
| SM31100   | Nitric acid causing toxic effect                         | 1                 |
| SL94500   | Nitrazepam poisoning                                     | 1                 |
| SLC4100   | Nitrate poisoning                                        | 1                 |
| SM5y300   | Nickel compounds causing toxic effect                    | 1                 |
| SL50.11   | Narcotic poisoning                                       | 1                 |
| SL54300   | Naproxen poisoning                                       | 1                 |
| SL21100   | Nandrolone poisoning                                     | 1                 |
| SM81.00   | Mushrooms causing toxic effect                           | 1                 |
| SLF..11   | Muscle drug poisoning                                    | 1                 |
| SL50500   | Morphine poisoning                                       | 1                 |
| 1BD2.00   | Morbid thoughts                                          | 1                 |
| SL90200   | Monoamine oxidase inhibitor poisoning                    | 1                 |
| 1BD6.00   | Moderate suicide risk                                    | 1                 |
| SL76.00   | Mixed sedative poisoning NEC                             | 1                 |
| SL07400   | Mitomycin poisoning                                      | 1                 |
| SL04200   | Minocycline poisoning                                    | 1                 |
| SM01.00   | Methyl alcohol causing toxic effect                      | 1                 |
| SL80100   | Methocarbamol poisoning                                  | 1                 |
| SL74.00   | Methaqualone compound poisoning                          | 1                 |
| SM01000   | Methanol causing toxic effect                            | 1                 |
| SL50200   | Methadone poisoning                                      | 1                 |
| SM5z.00   | Metals causing toxic effect NOS                          | 1                 |
| SL12300   | Mercury compound poisoning                               | 1                 |
| SM50.00   | Mercury causing toxic effect                             | 1                 |
| SL31600   | Mercaptopurine poisoning                                 | 1                 |
| SL95100   | Meprobamate poisoning                                    | 1                 |
| SL50400   | Meperidine (pethidine) poisoning                         | 1                 |



| Read code | Description                                                  | Number of studies |
|-----------|--------------------------------------------------------------|-------------------|
| SL54400   | Mefenamic acid poisoning                                     | 1                 |
| SL...13   | Medicinal poisoning                                          | 1                 |
| SL94400   | Medazepam poisoning                                          | 1                 |
| SL96200   | Marihuana poisoning                                          | 1                 |
| SM93200   | Malathion causing toxic effect                               | 1                 |
| SLD0100   | Magnesium trisilicate poisoning                              | 1                 |
| SLD3000   | Magnesium sulphate poisoning                                 | 1                 |
| T180.00   | MVTA - accid poisoning - exhaust gas of moving motor vehicle | 1                 |
| SL90211   | MAOI - monoamine oxidase inhibitor poisoning                 | 1                 |
| SL96100   | Lysergide (LSD) poisoning                                    | 1                 |
| 1BD7.00   | Low suicide risk                                             | 1                 |
| SL94300   | Lorazepam poisoning                                          | 1                 |
| SLG2.12   | Local detergent poisoning                                    | 1                 |
| SLG2.11   | Local astringent poisoning                                   | 1                 |
| SLG2.00   | Local astringent and detergent poisoning                     | 1                 |
| SLG0.00   | Local anti-infective and anti-inflammatory poisoning         | 1                 |
| SL8z.00   | Local anaesthetic poisoning NOS                              | 1                 |
| SLA0000   | Lobeline poisoning                                           | 1                 |
| 44W8100   | Lithium level high - toxic                                   | 1                 |
| SM70.00   | Liquefied petrol gas causing toxic effect                    | 1                 |
| SL85100   | Lidocaine poisoning                                          | 1                 |
| SL27100   | Levothyroxine sodium poisoning                               | 1                 |
| SL6y200   | Levodopa (L-dopa) poisoning                                  | 1                 |
| SL12200   | Lead compound poisoning                                      | 1                 |
| SM4z.00   | Lead compound causing toxic effect NOS                       | 1                 |
| SM4..00   | Lead and lead compounds causing toxic effect                 | 1                 |
| SM41000   | Lead acetate causing toxic effect                            | 1                 |
| TH02.00   | Late effects of accidental poisoning                         | 1                 |
| SC...00   | Late effects injury/poisoning/toxic effects/external causes  | 1                 |
| SC41.00   | Late effect of poison due to nonmedical substance            | 1                 |
| SC40.00   | Late effect of poison drug/medicament/biological substance   | 1                 |
| SC41.11   | Late effect of poison                                        | 1                 |
| SCz..00   | Late effect injury/poison/toxin effect/external cause NOS    | 1                 |
| SL83000   | Ketamine poisoning                                           | 1                 |
| SM12.00   | Kerosene causing toxic effect                                | 1                 |
| SLG4.12   | Keratoplastic poisoning                                      | 1                 |
| SL1x200   | Isoniazid poisoning                                          | 1                 |
| SLD1.00   | Irritant cathartic poisoning                                 | 1                 |
| SM5y200   | Iron compounds causing toxic effect                          | 1                 |
| SL40z00   | Iron and iron compound poisoning NOS                         | 1                 |
| SL40.00   | Iron and iron compound poisoning                             | 1                 |
| SL28000   | Iodide poisoning                                             | 1                 |
| SP35000   | Intoxication by serum                                        | 1                 |
| E250.14   | Intoxication - alcohol                                       | 1                 |
| 1BDC.00   | Intent of deliberate self harm with detailed plans           | 1                 |
| SL23.00   | Insulins and antidiabetic poisoning                          | 1                 |
| SL23400   | Insulin poisoning                                            | 1                 |
| TN...00   | Injury undetermined whether accidentally/purposely inflicted | 1                 |
| TNz..00   | Injury undetermined accidental or purposely inflicted NOS    | 1                 |
| TM21.00   | Injury due to legal intervention by poisoning by gas         | 1                 |
| Sz...00   | Injury and poisoning NOS                                     | 1                 |
| S....00   | Injury and poisoning                                         | 1                 |
| TN3y.00   | Injury ?accidental, other means of hang/strangle/suffocate   | 1                 |

| Read code | Description                                                  | Number of studies |
|-----------|--------------------------------------------------------------|-------------------|
| TN9..00   | Injury ?accidental, late effects                             | 1                 |
| TN3z.00   | Injury ?accidental, hanging/strangulation/suffocation NOS    | 1                 |
| TN70.00   | Injury ?accidental, fall from residential premises           | 1                 |
| TN71.00   | Injury ?accidental, fall from other man-made structure       | 1                 |
| TN72.00   | Injury ?accidental, fall from natural site                   | 1                 |
| TN7z.00   | Injury ?accidental, fall from high place NOS                 | 1                 |
| TN7..00   | Injury ?accidental, fall from high place                     | 1                 |
| TN4..00   | Injury ?accidental, drowning                                 | 1                 |
| TN61.00   | Injury ?accidental, by stabbing instrument                   | 1                 |
| TN51.00   | Injury ?accidental, by shotgun                               | 1                 |
| TN82.00   | Injury ?accidental, by scald                                 | 1                 |
| TN8y.00   | Injury ?accidental, by other specified means                 | 1                 |
| TN8..00   | Injury ?accidental, by other means                           | 1                 |
| TN54.00   | Injury ?accidental, by other firearm                         | 1                 |
| TN8z.00   | Injury ?accidental, by means NOS                             | 1                 |
| TN80100   | Injury ?accidental, by lying before moving object            | 1                 |
| TN80.00   | Injury ?accidental, by jumping or lying before moving object | 1                 |
| TN80000   | Injury ?accidental, by jumping before moving object          | 1                 |
| TN52.00   | Injury ?accidental, by hunting rifle                         | 1                 |
| TN50.00   | Injury ?accidental, by handgun                               | 1                 |
| TN5..00   | Injury ?accidental, by firearms and explosives               | 1                 |
| TN5z.00   | Injury ?accidental, by firearm or explosive NOS              | 1                 |
| TN83.00   | Injury ?accidental, by extremes of cold                      | 1                 |
| TN55.00   | Injury ?accidental, by explosive                             | 1                 |
| TN84.00   | Injury ?accidental, by electrocution                         | 1                 |
| TN6z.00   | Injury ?accidental, by cutting or stabbing instrument NOS    | 1                 |
| TN60.00   | Injury ?accidental, by cutting instrument                    | 1                 |
| TN6..00   | Injury ?accidental, by cutting and stabbing instruments      | 1                 |
| TN85.00   | Injury ?accidental, by crashing of motor vehicle             | 1                 |
| TN86.00   | Injury ?accidental, by crashing of aircraft                  | 1                 |
| TN87.00   | Injury ?accidental, by caustic substances, except poisoning  | 1                 |
| TN81.00   | Injury ?accidental, by burns or fire                         | 1                 |
| SL54100   | Indometacin poisoning                                        | 1                 |
| SL31.12   | Immunosuppressive poisoning                                  | 1                 |
| SL90100   | Imipramine poisoning                                         | 1                 |
| SL54200   | Ibuprofen poisoning                                          | 1                 |
| SL7..11   | Hypnotic poisoning                                           | 1                 |
| SLC6z00   | Hypertensive agent poisoning NOS                             | 1                 |
| SLB1200   | Hyoscine poisoning                                           | 1                 |
| SL95000   | Hydroxyzine poisoning                                        | 1                 |
| SL13.11   | Hydroxyquinoline poisoning                                   | 1                 |
| SM31000   | Hydrochloric acid causing toxic effect                       | 1                 |
| SL61.00   | Hydantoin derivative poisoning                               | 1                 |
| SL47100   | Human fibrinogen poisoning                                   | 1                 |
| SL2z.00   | Hormone or synthetic substitute poisoning NOS                | 1                 |
| SL2..00   | Hormone and synthetic substitute poisoning                   | 1                 |
| 1BD5.00   | High suicide risk                                            | 1                 |
| SL50100   | Heroin poisoning                                             | 1                 |
| SL42100   | Heparin poisoning                                            | 1                 |
| SL12z00   | Heavy metal anti-infective poisoning NOS                     | 1                 |
| SL12.00   | Heavy metal anti-infective poisoning                         | 1                 |
| SL3y000   | Heavy metal agonist poisoning                                | 1                 |
| 1BD..00   | Harmful thoughts                                             | 1                 |

| Read code | Description                                                 | Number of studies |
|-----------|-------------------------------------------------------------|-------------------|
| SL81.00   | Halothane poisoning                                         | 1                 |
| SL92000   | Haloperidol poisoning                                       | 1                 |
| SL96z00   | Hallucinogen poisoning NOS                                  | 1                 |
| SL96.00   | Hallucinogen poisoning                                      | 1                 |
| SLG4.00   | Hair treatment poisoning                                    | 1                 |
| 14K0.00   | H/O: repeated overdose                                      | 1                 |
| 14K..00   | H/O: poisoning                                              | 1                 |
| SL24211   | Growth hormone poisoning                                    | 1                 |
| SL01100   | Griseofulvin poisoning                                      | 1                 |
| SL24100   | Gonadotrophin poisoning                                     | 1                 |
| SL54000   | Gold salt poisoning                                         | 1                 |
| SLDz.00   | Gastrointestinal agent poisoning NOS                        | 1                 |
| SLD..00   | Gastrointestinal agent poisoning                            | 1                 |
| SM7z.00   | Gases, fumes or vapours causing toxic effect NOS            | 1                 |
| SLC3z00   | Ganglion-blocker poisoning NOS                              | 1                 |
| SLC3.00   | Ganglion-blocker poisoning                                  | 1                 |
| SM03z00   | Fusel oil causing toxic effect NOS                          | 1                 |
| SLE4100   | Furosemide poisoning                                        | 1                 |
| SM74.00   | Freon causing toxic effect                                  | 1                 |
| SL41000   | Folic acid poisoning                                        | 1                 |
| SL94200   | Flurazepam poisoning                                        | 1                 |
| SL91100   | Fluphenazine poisoning                                      | 1                 |
| SL31500   | Fluorouracil poisoning                                      | 1                 |
| SL1y000   | Flucytosine poisoning                                       | 1                 |
| SL40100   | Ferrous sulphate poisoning                                  | 1                 |
| SL40000   | Ferric salt poisoning                                       | 1                 |
| SLG..00   | Eye, otorhinolaryngological, skin and dental drug poisoning | 1                 |
| SLG5z00   | Eye drug poisoning NOS                                      | 1                 |
| SLG5.00   | Eye drug poisoning NEC                                      | 1                 |
| SLG..12   | Eye drug poisoning                                          | 1                 |
| SLF5.00   | Expectorant poisoning                                       | 1                 |
| SM00z00   | Ethyl alcohol causing toxic effect NOS                      | 1                 |
| SM00.00   | Ethyl alcohol causing toxic effect                          | 1                 |
| SL6y100   | Ethopropazine poisoning                                     | 1                 |
| SL82000   | Ether poisoning                                             | 1                 |
| SM00000   | Ethanol causing toxic effect                                | 1                 |
| SL1x000   | Ethambutol poisoning                                        | 1                 |
| SLE4000   | Ethacrynic acid poisoning                                   | 1                 |
| SL03000   | Erythromycin poisoning                                      | 1                 |
| SL03.00   | Erythromycin and macrolide poisoning                        | 1                 |
| SLF0000   | Ergot alkaloid poisoning                                    | 1                 |
| E230200   | Episodic acute alcoholic intoxication in alcoholism         | 1                 |
| SL34.00   | Enzyme poisoning NEC                                        | 1                 |
| SLG3.00   | Emollients, demulcents and protectant poisoning             | 1                 |
| SLD2.00   | Emollient cathartic poisoning                               | 1                 |
| SLD6.00   | Emetic drug poisoning                                       | 1                 |
| SLE5.00   | Electrolyte agent poisoning                                 | 1                 |
| SL97200   | Ecstasy poisoning                                           | 1                 |
| SLG6.00   | Ear, nose and throat drug poisoning NEC                     | 1                 |
| SLz..00   | Drug, medicament or biological substance poisoning NOS      | 1                 |
| SL...12   | Drug poisoning                                              | 1                 |
| SL04100   | Doxycycline poisoning                                       | 1                 |
| SLE..11   | Diuretic poisoning                                          | 1                 |

| Read code | Description                                            | Number of studies |
|-----------|--------------------------------------------------------|-------------------|
| SLC4000   | Dipyridamole poisoning                                 | 1                 |
| SL30100   | Diphenhydramine poisoning                              | 1                 |
| SLD2000   | Diocetyl sulphosuccinate poisoning                     | 1                 |
| SM02000   | Dimethyl carbinol causing toxic effect                 | 1                 |
| SL50700   | Dihydrocodeine poisoning                               | 1                 |
| SLC1000   | Digoxin poisoning                                      | 1                 |
| SLD4.00   | Digestant poisoning                                    | 1                 |
| SL94100   | Diazepam poisoning                                     | 1                 |
| SLHy100   | Diagnostic agent NEC, poisoning                        | 1                 |
| SL50600   | Dextropropoxyphene poisoning                           | 1                 |
| SLF4000   | Dextromethorphan poisoning                             | 1                 |
| SM96.11   | Detergent toxic effect                                 | 1                 |
| SM00100   | Denatured alcohol causing toxic effect                 | 1                 |
| ZX1..13   | Deliberate self-harm                                   | 1                 |
| SL07300   | Daunorubicin poisoning                                 | 1                 |
| SL07100   | Dactinomycin poisoning                                 | 1                 |
| SM92200   | DDT causing toxic effect                               | 1                 |
| SL31400   | Cytarabine poisoning                                   | 1                 |
| SL31300   | Cyclophosphamide poisoning                             | 1                 |
| SLC5000   | Cyclandelate poisoning                                 | 1                 |
| SM90z00   | Cyanides causing toxic effect NOS                      | 1                 |
| SM90.00   | Cyanides and hydrocyanic acid causing toxic effect     | 1                 |
| ZX13100   | Cutting own wrists                                     | 1                 |
| SL42000   | Coumarin poisoning                                     | 1                 |
| SL20000   | Cortisone derivative poisoning                         | 1                 |
| SL24000   | Corticotropin poisoning                                | 1                 |
| SM3..00   | Corrosives/acids/caustic alkalis causing toxic effect  | 1                 |
| SM3z.00   | Corrosive/acid/caustic alkali causing toxic effect NOS | 1                 |
| SM30z00   | Corrosive aromatics causing toxic effect NOS           | 1                 |
| SLC4.00   | Coronary vasodilator poisoning                         | 1                 |
| SM5y100   | Copper salts causing toxic effect                      | 1                 |
| E230100   | Continuous acute alcoholic intoxication in alcoholism  | 1                 |
| SL22200   | Combined oestrogen and progesterone poisoning          | 1                 |
| SLE7100   | Colchicine poisoning                                   | 1                 |
| SL50300   | Codeine (methyldmorphine) poisoning                    | 1                 |
| SL85000   | Cocaine poisoning                                      | 1                 |
| SLC6000   | Clonidine poisoning                                    | 1                 |
| SM56.00   | Chromium causing toxic effect                          | 1                 |
| SLB0z00   | Cholinergic poisoning NOS                              | 1                 |
| SLB0.11   | Cholinergic poisoning                                  | 1                 |
| SL91000   | Chlorpromazine poisoning                               | 1                 |
| SL30000   | Chlorphenamine poisoning                               | 1                 |
| SL14000   | Chloroquine poisoning                                  | 1                 |
| SM75100   | Chloroacetophenone causing toxic effect                | 1                 |
| SM76.00   | Chlorine gas causing toxic effect                      | 1                 |
| SM92.00   | Chlorinated hydrocarbon causing toxic effect           | 1                 |
| SL94000   | Chlordiazepoxide poisoning                             | 1                 |
| SL02000   | Chloramphenicol poisoning                              | 1                 |
| SL31200   | Chlorambucil poisoning                                 | 1                 |
| SL71.00   | Chloral hydrate poisoning                              | 1                 |
| SL13000   | Chiniofon poisoning                                    | 1                 |
| SLH2.11   | Chelating agent poisoning                              | 1                 |
| SLAz.00   | Central nervous system stimulant poisoning NOS         | 1                 |

| Read code | Description                                                  | Number of studies |
|-----------|--------------------------------------------------------------|-------------------|
| SLA..00   | Central nervous system stimulant poisoning                   | 1                 |
| SL80z00   | Central nervous system muscle-tone depressant poisoning NOS  | 1                 |
| SL80.00   | Central nervous system muscle-tone depressant poisoning      | 1                 |
| SL8..00   | Central nervous system depressants and anaesthetic poisoning | 1                 |
| SLH0000   | Central appetite depressant poisoning                        | 1                 |
| SL05000   | Cefalexin poisoning                                          | 1                 |
| SM32z00   | Caustic alkalis causing toxic effect NOS                     | 1                 |
| SM32.00   | Caustic alkalis causing toxic effect                         | 1                 |
| Tz...00   | Causes of injury and poisoning NOS                           | 1                 |
| T....00   | Causes of injury and poisoning                               | 1                 |
| T8...11   | Cause of overdose - accidental                               | 1                 |
| SLC..00   | Cardiovascular drug poisoning                                | 1                 |
| SLCz.00   | Cardiovascular agent poisoning NOS                           | 1                 |
| SLC0.00   | Cardiac rhythm drug poisoning                                | 1                 |
| SLC1.00   | Cardiac glycoside poisoning                                  | 1                 |
| SM21.00   | Carbon tetrachloride causing toxic effect                    | 1                 |
| SM6..00   | Carbon monoxide causing toxic effect                         | 1                 |
| SM93000   | Carbaryl causing toxic effect                                | 1                 |
| SL80000   | Carbamate poisoning                                          | 1                 |
| SLB1400   | Caramiphen poisoning                                         | 1                 |
| SL96000   | Cannabis poisoning                                           | 1                 |
| SL97100   | Caffeine poisoning                                           | 1                 |
| SM55.00   | Cadmium causing toxic effect                                 | 1                 |
| SM70000   | Butane causing toxic effect                                  | 1                 |
| SL70200   | Butabarbitalone poisoning                                    | 1                 |
| SL31100   | Busulfan poisoning                                           | 1                 |
| SL07200   | Bleomycin poisoning                                          | 1                 |
| SL...11   | Biological substance poisoning                               | 1                 |
| SL23100   | Biguanide poisoning                                          | 1                 |
| SLC0400   | Beta blocker poisoning                                       | 1                 |
| SM53.00   | Beryllium causing toxic effect                               | 1                 |
| SM82.00   | Berries and other plants causing toxic effect                | 1                 |
| SM82.11   | Berries - toxic effect                                       | 1                 |
| SLE3000   | Benzothiazide poisoning                                      | 1                 |
| SL94z00   | Benzodiazepine poisoning NOS                                 | 1                 |
| SL94.00   | Benzodiazepine poisoning                                     | 1                 |
| SM20.00   | Benzene causing toxic effect                                 | 1                 |
| SL70z00   | Barbiturate poisoning NOS                                    | 1                 |
| SL70.00   | Barbiturate poisoning                                        | 1                 |
| SL70100   | Barbitone poisoning                                          | 1                 |
| SL31000   | Azathioprine poisoning                                       | 1                 |
| SLB..00   | Autonomic nervous system drug poisoning                      | 1                 |
| SLB1000   | Atropine poisoning                                           | 1                 |
| 1BD8.00   | At risk of DSH - deliberate self harm                        | 1                 |
| TL22.00   | Assault by poisoning by other gases or vapours               | 1                 |
| TL20.00   | Assault by poisoning by drugs or medicines                   | 1                 |
| TL2z.00   | Assault by poisoning NOS                                     | 1                 |
| TL2..00   | Assault by poisoning                                         | 1                 |
| SL51000   | Aspirin poisoning                                            | 1                 |
| SL11.00   | Arsenical anti-infective poisoning                           | 1                 |
| SM51.00   | Arsenic causing toxic effect                                 | 1                 |
| SL52z00   | Aromatic analgesic poisoning NOS                             | 1                 |
| SL52.00   | Aromatic analgesic poisoning NEC                             | 1                 |

| Read code | Description                                             | Number of studies |
|-----------|---------------------------------------------------------|-------------------|
| SLF4z00   | Antitussive poisoning NOS                               | 1                 |
| SL28.00   | Antithyroid agent poisoning                             | 1                 |
| SL54z00   | Antirheumatic poisoning NOS                             | 1                 |
| SL54.00   | Antirheumatic poisoning                                 | 1                 |
| SL5y200   | Antipyretic poisoning, NEC                              | 1                 |
| SL5..12   | Antipyretic poisoning                                   | 1                 |
| SL6y.00   | Antiparkinsonism drug poisoning                         | 1                 |
| SL6yz00   | Antiparkinsonian drug poisoning NOS                     | 1                 |
| SL31z00   | Antineoplastic or immunosuppressive poisoning NOS       | 1                 |
| SL07.00   | Antineoplastic antibiotic poisoning                     | 1                 |
| SL31.00   | Antineoplastic and immunosuppressive poisoning          | 1                 |
| SL14z00   | Antimalarial drug poisoning NOS                         | 1                 |
| SL14.00   | Antimalarial drug poisoning                             | 1                 |
| SLC2.00   | Antilipaemic and antiarteriosclerotic poisoning         | 1                 |
| SL30.13   | Antihistamine poisoning                                 | 1                 |
| SL01.00   | Antifungal antibiotic poisoning                         | 1                 |
| SL30.12   | Antiemetic poisoning                                    | 1                 |
| SLD5z00   | Antidiarrhoeal poisoning NOS                            | 1                 |
| SLD5.00   | Antidiarrhoeal poisoning                                | 1                 |
| SL6xz00   | Anticonvulsant poisoning NOS                            | 1                 |
| SL6..11   | Anticonvulsant poisoning                                | 1                 |
| SL6z.00   | Anticonvulsant or antiparkinsonian drug poisoning NOS   | 1                 |
| SL6..00   | Anticonvulsant and antiParkinsonian drug poisoning      | 1                 |
| SL42z00   | Anticoagulant poisoning NOS                             | 1                 |
| SL42.00   | Anticoagulant poisoning                                 | 1                 |
| SL45z00   | Anticoagulant agonist poisoning NOS                     | 1                 |
| SL45.00   | Anticoagulant agonist poisoning                         | 1                 |
| SLB0100   | Anticholinesterase poisoning                            | 1                 |
| SL0z.00   | Antibiotic poisoning NOS                                | 1                 |
| SL0..00   | Antibiotic poisoning                                    | 1                 |
| SLF7z00   | Antiasthmatic poisoning NOS                             | 1                 |
| SL30.00   | Antiallergic and antiemetic drug poisoning              | 1                 |
| SL1z.00   | Anti-infective poisoning NOS                            | 1                 |
| SLD0.00   | Anti-gastric acid drug poisoning                        | 1                 |
| SLF6.00   | Anti-common cold drug poisoning                         | 1                 |
| SL16.00   | Anthelmintic drug poisoning                             | 1                 |
| SL24.00   | Anterior pituitary hormone poisoning                    | 1                 |
| SLD0z00   | Antacid drug poisoning NOS                              | 1                 |
| SLD0.11   | Antacid drug poisoning                                  | 1                 |
| SL21.12   | Androgen poisoning                                      | 1                 |
| SL21z00   | Androgen or anabolic poisoning NOS                      | 1                 |
| SL21.00   | Androgen and anabolic poisoning                         | 1                 |
| SL5z.00   | Analgesic, antipyretic or antirheumatic poisoning NOS   | 1                 |
| SL5..00   | Analgesic, antipyretic and antirheumatic drug poisoning | 1                 |
| SL5y100   | Analgesic poisoning, NEC                                | 1                 |
| SL5..11   | Analgesic poisoning                                     | 1                 |
| SLA0.00   | Analeptic poisoning                                     | 1                 |
| SL8..11   | Anaesthetic poisoning                                   | 1                 |
| SL21.11   | Anabolic steroid poisoning                              | 1                 |
| SM03000   | Amyl alcohol causing toxic effect                       | 1                 |
| SL00000   | Ampicillin poisoning                                    | 1                 |
| SL01000   | Amphotericin B poisoning                                | 1                 |
| SL70000   | Amobarbital poisoning                                   | 1                 |

| Read code | Description                                                  | Number of studies |
|-----------|--------------------------------------------------------------|-------------------|
| SL90000   | Amitriptyline poisoning                                      | 1                 |
| SLF7000   | Aminophylline poisoning                                      | 1                 |
| SL97000   | Amphetamine poisoning                                        | 1                 |
| SL6y000   | Amantadine poisoning                                         | 1                 |
| SLD0000   | Aluminium hydroxide poisoning                                | 1                 |
| SLE7000   | Allopurinol poisoning                                        | 1                 |
| SLH3.00   | Alcohol deterrent poisoning                                  | 1                 |
| E230.11   | Alcohol dependence with acute alcoholic intoxication         | 1                 |
| SM0z.00   | Alcohol causing toxic effect NOS                             | 1                 |
| SM0..00   | Alcohol causing toxic effect                                 | 1                 |
| SL4..00   | Agents affecting blood constituents, causing poisoning       | 1                 |
| TJF5100   | Adverse reaction to ipecacuanha                              | 1                 |
| TJF5000   | Adverse reaction to acetylcysteine                           | 1                 |
| SLC8000   | Adrenochrome poisoning                                       | 1                 |
| SLB2.11   | Adrenergic poisoning                                         | 1                 |
| SL20z00   | Adrenal cortico-steroid poisoning NOS                        | 1                 |
| SL20.00   | Adrenal cortico-steroid poisoning                            | 1                 |
| 761H300   | Administration of activated charcoal                         | 1                 |
| E230000   | Acute alcoholic intoxication, unspecified, in alcoholism     | 1                 |
| E230z00   | Acute alcoholic intoxication in alcoholism NOS               | 1                 |
| E230.00   | Acute alcoholic intoxication in alcoholism                   | 1                 |
| SM31z00   | Acids causing toxic effect NOS                               | 1                 |
| SM31.00   | Acids causing toxic effect                                   | 1                 |
| SL32.00   | Acidifying agent poisoning                                   | 1                 |
| SLB0000   | Acetylcholine poisoning                                      | 1                 |
| SM2y000   | Acetone causing toxic effect                                 | 1                 |
| SL23000   | Acetohexamide poisoning                                      | 1                 |
| SLE2000   | Acetazolamide poisoning                                      | 1                 |
| T80yz00   | Accidental poisoning-oth analgesic,antipyretic,antirheum NOS | 1                 |
| T830z00   | Accidental poisoning- phenothiazine-based tranquillisers NOS | 1                 |
| T832z00   | Accidental poisoning- benzodiazepine-based tranquilliser NOS | 1                 |
| T953100   | Accidental poisoning from seeds                              | 1                 |
| T954.00   | Accidental poisoning from other plants                       | 1                 |
| T955y00   | Accidental poisoning from other fungi                        | 1                 |
| T955.00   | Accidental poisoning from mushrooms and other fungi          | 1                 |
| T955z00   | Accidental poisoning from mushrooms and fungi NOS            | 1                 |
| T955000   | Accidental poisoning from mushrooms                          | 1                 |
| T95..00   | Accidental poisoning from foodstuffs and poisonous plants    | 1                 |
| T953z00   | Accidental poisoning from berries or seeds NOS               | 1                 |
| T953.00   | Accidental poisoning from berries and seeds                  | 1                 |
| T953000   | Accidental poisoning from berries                            | 1                 |
| T937400   | Accidental poisoning by zinc phosphide                       | 1                 |
| T916300   | Accidental poisoning by white washes                         | 1                 |
| T885.00   | Accidental poisoning by water,mineral,uric acid metab drugs  | 1                 |
| T937300   | Accidental poisoning by warfarin                             | 1                 |
| T981z00   | Accidental poisoning by utility gas NOS                      | 1                 |
| T88z.00   | Accidental poisoning by unspecified drugs                    | 1                 |
| T83z.00   | Accidental poisoning by tranquillisers NOS                   | 1                 |
| T83..00   | Accidental poisoning by tranquillisers                       | 1                 |
| T930500   | Accidental poisoning by toxaphene                            | 1                 |
| T964700   | Accidental poisoning by thallium compounds                   | 1                 |
| T937200   | Accidental poisoning by thallium                             | 1                 |
| T993.00   | Accidental poisoning by tear gas                             | 1                 |

| Read code | Description                                                | Number of studies |
|-----------|------------------------------------------------------------|-------------------|
| T910.00   | Accidental poisoning by synthetic detergents and shampoos  | 1                 |
| T941200   | Accidental poisoning by sulphuric acid                     | 1                 |
| T991.00   | Accidental poisoning by sulphur dioxide                    | 1                 |
| T937100   | Accidental poisoning by squill and derivatives             | 1                 |
| T92z.00   | Accidental poisoning by solvent NOS                        | 1                 |
| T96z.00   | Accidental poisoning by solid and liquid substances NOS    | 1                 |
| T942000   | Accidental poisoning by sodium hydroxide                   | 1                 |
| T911.00   | Accidental poisoning by soap products                      | 1                 |
| T887z00   | Accidental poisoning by skin, eye, ENT and dental drug NOS | 1                 |
| T887000   | Accidental poisoning by skin drugs                         | 1                 |
| T82z.00   | Accidental poisoning by sedatives and hypnotics NOS        | 1                 |
| T903300   | Accidental poisoning by secondary propyl alcohol           | 1                 |
| T913000   | Accidental poisoning by scouring agents                    | 1                 |
| T803z00   | Accidental poisoning by salicylates NOS                    | 1                 |
| T803.00   | Accidental poisoning by salicylates                        | 1                 |
| T937z00   | Accidental poisoning by rodenticides NOS                   | 1                 |
| T937.00   | Accidental poisoning by rodenticides                       | 1                 |
| T815.00   | Accidental poisoning by quinalbarbitone                    | 1                 |
| T805.00   | Accidental poisoning by pyrazole derivatives               | 1                 |
| T84z.00   | Accidental poisoning by psychotropic agents NOS            | 1                 |
| T841400   | Accidental poisoning by psilocin                           | 1                 |
| T932200   | Accidental poisoning by propoxur                           | 1                 |
| T980200   | Accidental poisoning by propane                            | 1                 |
| T830300   | Accidental poisoning by promazine                          | 1                 |
| T830200   | Accidental poisoning by prochlorperazine                   | 1                 |
| T881.00   | Accidental poisoning by primarily systemic agents          | 1                 |
| T912.00   | Accidental poisoning by polishes                           | 1                 |
| T965z00   | Accidental poisoning by plant foods and fertilisers NOS    | 1                 |
| T965.00   | Accidental poisoning by plant foods and fertilisers        | 1                 |
| T965000   | Accidental poisoning by plant food                         | 1                 |
| T973.00   | Accidental poisoning by piped natural gas                  | 1                 |
| T938200   | Accidental poisoning by phosphine                          | 1                 |
| T805100   | Accidental poisoning by phenylbutazone                     | 1                 |
| T830.00   | Accidental poisoning by phenothiazine-based tranquillisers | 1                 |
| T940011   | Accidental poisoning by phenol                             | 1                 |
| T814.00   | Accidental poisoning by phenobarbitone                     | 1                 |
| T804200   | Accidental poisoning by phenacetin                         | 1                 |
| T920.00   | Accidental poisoning by petroleum solvents                 | 1                 |
| T923.00   | Accidental poisoning by petroleum solids                   | 1                 |
| T920200   | Accidental poisoning by petroleum naphtha                  | 1                 |
| T921.12   | Accidental poisoning by petroleum fuels                    | 1                 |
| T920z00   | Accidental poisoning by petrol solvents NOS                | 1                 |
| T923z00   | Accidental poisoning by petrol solids NOS                  | 1                 |
| T92..00   | Accidental poisoning by petrol products                    | 1                 |
| T921.00   | Accidental poisoning by petrol fuels and cleaners          | 1                 |
| T921z00   | Accidental poisoning by petrol fuel or cleaner NOS         | 1                 |
| T921200   | Accidental poisoning by petrol                             | 1                 |
| T802100   | Accidental poisoning by pethidine                          | 1                 |
| T813.00   | Accidental poisoning by pentobarbitone                     | 1                 |
| T80y000   | Accidental poisoning by pentazocine                        | 1                 |
| T935500   | Accidental poisoning by paraquat                           | 1                 |
| T923000   | Accidental poisoning by paraffin wax                       | 1                 |
| T804100   | Accidental poisoning by paracetamol                        | 1                 |



| Read code | Description                                                  | Number of studies |
|-----------|--------------------------------------------------------------|-------------------|
| T916z00   | Accidental poisoning by paint or varnish NOS                 | 1                 |
| T887300   | Accidental poisoning by otorhinolaryngological drugs         | 1                 |
| T98..00   | Accidental poisoning by other utility gas + carbon monoxide  | 1                 |
| T981.00   | Accidental poisoning by other utility gas                    | 1                 |
| T83yz00   | Accidental poisoning by other tranquillisers NOS             | 1                 |
| T83y.00   | Accidental poisoning by other tranquillisers                 | 1                 |
| T924z00   | Accidental poisoning by other solvents NOS                   | 1                 |
| T924.00   | Accidental poisoning by other solvents                       | 1                 |
| T96y.00   | Accidental poisoning by other solid and liquid substances OS | 1                 |
| T96..00   | Accidental poisoning by other solid and liquid substances    | 1                 |
| T82y.00   | Accidental poisoning by other sedatives and hypnotics OS     | 1                 |
| T82..00   | Accidental poisoning by other sedatives and hypnotics        | 1                 |
| T84..00   | Accidental poisoning by other psychotropic agents            | 1                 |
| T916.00   | Accidental poisoning by other paints and varnishes           | 1                 |
| T802z00   | Accidental poisoning by other opiates NOS                    | 1                 |
| T802.00   | Accidental poisoning by other opiates                        | 1                 |
| T807.00   | Accidental poisoning by other non-narcotic analgesics        | 1                 |
| T9...00   | Accidental poisoning by other non-drug substances            | 1                 |
| T964.00   | Accidental poisoning by other metals + compounds and fumes   | 1                 |
| T934.00   | Accidental poisoning by other insecticides                   | 1                 |
| T99y.00   | Accidental poisoning by other gases and vapours OS           | 1                 |
| T99yz00   | Accidental poisoning by other gases and vapours NOS          | 1                 |
| T99..00   | Accidental poisoning by other gases and vapours              | 1                 |
| T95y.00   | Accidental poisoning by other foods                          | 1                 |
| T901.00   | Accidental poisoning by other ethyl alcohol and its products | 1                 |
| T85..00   | Accidental poisoning by other drugs acting on nervous system | 1                 |
| T88y.00   | Accidental poisoning by other drugs OS                       | 1                 |
| T88yz00   | Accidental poisoning by other drugs NOS                      | 1                 |
| T88..00   | Accidental poisoning by other drugs                          | 1                 |
| T94y.00   | Accidental poisoning by other corrosives and caustics        | 1                 |
| T913z00   | Accidental poisoning by other cleaning agents NOS            | 1                 |
| T913.00   | Accidental poisoning by other cleaning agents                | 1                 |
| T90y.00   | Accidental poisoning by other alcohols                       | 1                 |
| T966y00   | Accidental poisoning by other adhesives                      | 1                 |
| T851.00   | Accidental poisoning by oth central nervous syst depressants | 1                 |
| T80y.00   | Accidental poisoning by oth analgesics,antipyretic,antirheum | 1                 |
| T931z00   | Accidental poisoning by organophosphorus insecticides NOS    | 1                 |
| T931.00   | Accidental poisoning by organophosphorus insecticides        | 1                 |
| T930.00   | Accidental poisoning by organochlorine insecticides          | 1                 |
| T936000   | Accidental poisoning by organic mercurials                   | 1                 |
| T802300   | Accidental poisoning by opium                                | 1                 |
| T843100   | Accidental poisoning by opiate antagonists                   | 1                 |
| T887200   | Accidental poisoning by ophthalmological drugs               | 1                 |
| T855100   | Accidental poisoning by noradrenalin                         | 1                 |
| T807z00   | Accidental poisoning by non-narcotic analgesics NOS          | 1                 |
| T916200   | Accidental poisoning by non-lead paints                      | 1                 |
| T990.00   | Accidental poisoning by nitrogen oxides                      | 1                 |
| T941100   | Accidental poisoning by nitric acid                          | 1                 |
| T832500   | Accidental poisoning by nitrazepam                           | 1                 |
| T964600   | Accidental poisoning by nickel compounds                     | 1                 |
| T806200   | Accidental poisoning by naproxen                             | 1                 |
| T886.00   | Accidental poisoning by muscle + respiratory system drugs    | 1                 |
| T887100   | Accidental poisoning by mucous membrane drugs                | 1                 |

| Read code | Description                                                 | Number of studies |
|-----------|-------------------------------------------------------------|-------------------|
| T982.00   | Accidental poisoning by motor vehicle exhaust gas           | 1                 |
| T802200   | Accidental poisoning by morphine                            | 1                 |
| T840200   | Accidental poisoning by monoamine oxidase inhibitors        | 1                 |
| T933.00   | Accidental poisoning by mixtures of insecticides            | 1                 |
| T935400   | Accidental poisoning by mixtures herbicides+plant food etc  | 1                 |
| T825.00   | Accidental poisoning by mixed sedatives NEC                 | 1                 |
| T901100   | Accidental poisoning by methylated spirit                   | 1                 |
| T938100   | Accidental poisoning by methyl bromide                      | 1                 |
| T902.00   | Accidental poisoning by methyl alcohol                      | 1                 |
| T823.00   | Accidental poisoning by methaqualone compounds              | 1                 |
| T902000   | Accidental poisoning by methanol                            | 1                 |
| T801.00   | Accidental poisoning by methadone                           | 1                 |
| T964z00   | Accidental poisoning by metals + compounds and fumes NOS    | 1                 |
| T961000   | Accidental poisoning by mercury, unspecified                | 1                 |
| T961z00   | Accidental poisoning by mercury, NOS                        | 1                 |
| T961200   | Accidental poisoning by mercury fumes                       | 1                 |
| T961.00   | Accidental poisoning by mercury and its compounds and fumes | 1                 |
| T832400   | Accidental poisoning by medazepam                           | 1                 |
| T964500   | Accidental poisoning by manganese and its compounds         | 1                 |
| T931300   | Accidental poisoning by malathion                           | 1                 |
| T841100   | Accidental poisoning by lysergide, LSD                      | 1                 |
| T922.00   | Accidental poisoning by lubricating oils                    | 1                 |
| T832300   | Accidental poisoning by lorazepam                           | 1                 |
| T852.00   | Accidental poisoning by local anaesthetic                   | 1                 |
| T852100   | Accidental poisoning by lignocaine                          | 1                 |
| T960000   | Accidental poisoning by lead, unspecified                   | 1                 |
| T960z00   | Accidental poisoning by lead, NOS                           | 1                 |
| T915.00   | Accidental poisoning by lead paints                         | 1                 |
| T960.00   | Accidental poisoning by lead and its compounds and fumes    | 1                 |
| T916000   | Accidental poisoning by lacquers                            | 1                 |
| T806400   | Accidental poisoning by ketoprofen                          | 1                 |
| T921300   | Accidental poisoning by kerosene                            | 1                 |
| T903z00   | Accidental poisoning by isopropyl alcohol NOS               | 1                 |
| T903100   | Accidental poisoning by isopropanol                         | 1                 |
| T964400   | Accidental poisoning by iron compounds                      | 1                 |
| T934z00   | Accidental poisoning by insecticides NOS                    | 1                 |
| T806100   | Accidental poisoning by indomethacin                        | 1                 |
| T840100   | Accidental poisoning by imipramine                          | 1                 |
| T806300   | Accidental poisoning by ibuprofen                           | 1                 |
| T854200   | Accidental poisoning by hyoscine                            | 1                 |
| T941000   | Accidental poisoning by hydrochloric acid                   | 1                 |
| T850100   | Accidental poisoning by hydantoin derivatives               | 1                 |
| T91z.00   | Accidental poisoning by household agents NOS                | 1                 |
| T91..00   | Accidental poisoning by household agents                    | 1                 |
| T880.00   | Accidental poisoning by hormones and synthetic substitutes  | 1                 |
| T800.00   | Accidental poisoning by heroin                              | 1                 |
| T935z00   | Accidental poisoning by herbicides NOS                      | 1                 |
| T935.00   | Accidental poisoning by herbicides                          | 1                 |
| T981300   | Accidental poisoning by heating gas NOS                     | 1                 |
| T831000   | Accidental poisoning by haloperidol                         | 1                 |
| T851200   | Accidental poisoning by halogenated hydrocarbon derivatives | 1                 |
| T841.00   | Accidental poisoning by hallucinogens                       | 1                 |
| T841z00   | Accidental poisoning by hallucinogen NOS                    | 1                 |

| Read code | Description                                                 | Number of studies |
|-----------|-------------------------------------------------------------|-------------------|
| T806000   | Accidental poisoning by gold salts                          | 1                 |
| T966z00   | Accidental poisoning by glues and adhesives NOS             | 1                 |
| T966.00   | Accidental poisoning by glues and adhesives                 | 1                 |
| T966000   | Accidental poisoning by glues                               | 1                 |
| T884.00   | Accidental poisoning by gastrointestinal system drugs       | 1                 |
| T470.00   | Accidental poisoning by gases or fumes on ship              | 1                 |
| T99z.00   | Accidental poisoning by gases and vapours NOS               | 1                 |
| T921100   | Accidental poisoning by gas oils                            | 1                 |
| T97..00   | Accidental poisoning by gas distributed by pipeline         | 1                 |
| T936z00   | Accidental poisoning by fungicides NOS                      | 1                 |
| T936.00   | Accidental poisoning by fungicides                          | 1                 |
| T938.00   | Accidental poisoning by fumigants                           | 1                 |
| T95z.00   | Accidental poisoning by foodstuffs and poisonous plants NOS | 1                 |
| T965100   | Accidental poisoning by fertilisers                         | 1                 |
| T982000   | Accidental poisoning by exhaust gas-stationary farm tractor | 1                 |
| T982z00   | Accidental poisoning by exhaust gas from motor vehicle NOS  | 1                 |
| T982100   | Accidental poisoning by exhaust gas from gas engine         | 1                 |
| T901z00   | Accidental poisoning by ethyl alcohol NOS                   | 1                 |
| T901300   | Accidental poisoning by ethanol, NOS                        | 1                 |
| T8...00   | Accidental poisoning by drugs, medicines and biologicals    | 1                 |
| T882.00   | Accidental poisoning by drugs affecting blood constituents  | 1                 |
| T85z.00   | Accidental poisoning by drugs acting on nervous system NOS  | 1                 |
| T8z..00   | Accidental poisoning by drugs NOS                           | 1                 |
| T914.00   | Accidental poisoning by disinfectants                       | 1                 |
| T935300   | Accidental poisoning by diquat                              | 1                 |
| T930300   | Accidental poisoning by dieldrin                            | 1                 |
| T832100   | Accidental poisoning by diazepam                            | 1                 |
| T800.11   | Accidental poisoning by diamorphine                         | 1                 |
| T887400   | Accidental poisoning by dental drugs                        | 1                 |
| T901000   | Accidental poisoning by denatured alcohol                   | 1                 |
| T938000   | Accidental poisoning by cyanides                            | 1                 |
| T967.00   | Accidental poisoning by cosmetics                           | 1                 |
| T94z.00   | Accidental poisoning by corrosives and caustics NOS         | 1                 |
| T94..00   | Accidental poisoning by corrosives and caustics NEC         | 1                 |
| T940.00   | Accidental poisoning by corrosive aromatics                 | 1                 |
| T964300   | Accidental poisoning by copper salts                        | 1                 |
| T981400   | Accidental poisoning by cooking gas NOS                     | 1                 |
| T802000   | Accidental poisoning by codeine                             | 1                 |
| T852000   | Accidental poisoning by cocaine                             | 1                 |
| T971.00   | Accidental poisoning by coal gas NOS                        | 1                 |
| T853.00   | Accidental poisoning by cholinergics                        | 1                 |
| T830000   | Accidental poisoning by chlorpromazine                      | 1                 |
| T99y000   | Accidental poisoning by chlorine                            | 1                 |
| T832000   | Accidental poisoning by chlordiazepoxide                    | 1                 |
| T930100   | Accidental poisoning by chlordane                           | 1                 |
| T935200   | Accidental poisoning by chlorates                           | 1                 |
| T820.00   | Accidental poisoning by chloral hydrate                     | 1                 |
| T88y000   | Accidental poisoning by central appetite depressants        | 1                 |
| T942z00   | Accidental poisoning by caustic alkalis NOS                 | 1                 |
| T942.00   | Accidental poisoning by caustic alkalis                     | 1                 |
| T883.00   | Accidental poisoning by cardiovascular system drugs         | 1                 |
| T983.00   | Accidental poisoning by carbon monoxide-other domestic fuel | 1                 |
| T970.00   | Accidental poisoning by carbon monoxide from piped gas      | 1                 |

| Read code | Description                                                  | Number of studies |
|-----------|--------------------------------------------------------------|-------------------|
| T98y.00   | Accidental poisoning by carbon monoxide from other sources   | 1                 |
| T98yz00   | Accidental poisoning by carbon monoxide from oth source NOS  | 1                 |
| T98z.00   | Accidental poisoning by carbon monoxide NOS                  | 1                 |
| T983z00   | Accidental poisoning by carbon monoxide - domestic fuel NOS  | 1                 |
| T940000   | Accidental poisoning by carbolic acid                        | 1                 |
| T932100   | Accidental poisoning by carbaryl                             | 1                 |
| T932.00   | Accidental poisoning by carbamates                           | 1                 |
| T841000   | Accidental poisoning by cannabis derivatives                 | 1                 |
| T842100   | Accidental poisoning by caffeine                             | 1                 |
| T964200   | Accidental poisoning by cadmium and its compounds            | 1                 |
| T980100   | Accidental poisoning by butane                               | 1                 |
| T993000   | Accidental poisoning by bromobenzyl cyanide                  | 1                 |
| T822.00   | Accidental poisoning by bromine compounds                    | 1                 |
| T822000   | Accidental poisoning by bromides                             | 1                 |
| T964100   | Accidental poisoning by brass fumes                          | 1                 |
| T964000   | Accidental poisoning by beryllium and its compounds          | 1                 |
| T832.00   | Accidental poisoning by benzodiazepine-based tranquillisers  | 1                 |
| T930000   | Accidental poisoning by benzene hexachlorine                 | 1                 |
| T924000   | Accidental poisoning by benzene                              | 1                 |
| T81z.00   | Accidental poisoning by barbiturates NOS                     | 1                 |
| T81..00   | Accidental poisoning by barbiturates                         | 1                 |
| T811.00   | Accidental poisoning by barbitone                            | 1                 |
| T854000   | Accidental poisoning by atropine                             | 1                 |
| T803000   | Accidental poisoning by aspirin                              | 1                 |
| T963000   | Accidental poisoning by arsenic, unspecified                 | 1                 |
| T963100   | Accidental poisoning by arsenic compounds                    | 1                 |
| T963.00   | Accidental poisoning by arsenic and its compounds and fumes  | 1                 |
| T804.00   | Accidental poisoning by aromatic analgesics NEC              | 1                 |
| T806z00   | Accidental poisoning by antirheumatics NOS                   | 1                 |
| T806.00   | Accidental poisoning by antirheumatics                       | 1                 |
| T840z00   | Accidental poisoning by antidepressants NOS                  | 1                 |
| T840.00   | Accidental poisoning by antidepressants                      | 1                 |
| T850z00   | Accidental poisoning by anticonvulsant/anti-parkin drug NOS  | 1                 |
| T850.00   | Accidental poisoning by anticonvulsant + anti-parkinson drug | 1                 |
| T850.11   | Accidental poisoning by anticonvulsant                       | 1                 |
| T854.00   | Accidental poisoning by anticholinergics                     | 1                 |
| T86..00   | Accidental poisoning by antibiotics                          | 1                 |
| T850.12   | Accidental poisoning by anti-parkinsonism drug               | 1                 |
| T87..00   | Accidental poisoning by anti-infectives                      | 1                 |
| T80..00   | Accidental poisoning by analgesics,antipyretic,antirheumatic | 1                 |
| T80z.00   | Accidental poisoning by analgesics,antipyretic,antirheum NOS | 1                 |
| T842000   | Accidental poisoning by amphetamine                          | 1                 |
| T840000   | Accidental poisoning by amitriptyline                        | 1                 |
| T900.00   | Accidental poisoning by alcoholic beverages                  | 1                 |
| T90..00   | Accidental poisoning by alcohol, NEC                         | 1                 |
| T90z.00   | Accidental poisoning by alcohol NOS                          | 1                 |
| T93..00   | Accidental poisoning by agricultural chemical preparations   | 1                 |
| T855.00   | Accidental poisoning by adrenergics                          | 1                 |
| T855000   | Accidental poisoning by adrenalin                            | 1                 |
| T941z00   | Accidental poisoning by acids NOS                            | 1                 |
| T941.00   | Accidental poisoning by acids                                | 1                 |
| T981000   | Accidental poisoning by acetylene                            | 1                 |
| T930200   | Accidental poisoning by DDT                                  | 1                 |

| <b>Read code</b> | <b>Description</b>                                           | <b>Number of studies</b> |
|------------------|--------------------------------------------------------------|--------------------------|
| T983300          | Accidental poisoning by CO- kerosene in domestic stove/fire  | 1                        |
| T983100          | Accidental poisoning by CO- coke in domestic stove/fireplace | 1                        |
| T983000          | Accidental poisoning by CO- coal in domestic stove/fireplace | 1                        |
| T98y100          | Accidental poisoning by CO - kiln vapour                     | 1                        |
| T98y200          | Accidental poisoning by CO - fuels in industrial use         | 1                        |
| T98y000          | Accidental poisoning by CO - blast furnace gas               | 1                        |
| T93z.00          | Accidental poisoning agricultural chemical preparations NOS  | 1                        |
| T9z..00          | Accidental poisoning NOS                                     | 1                        |
| T77z.00          | Accident/poisoning occurred in residential institution NOS   | 1                        |
| T85y.00          | Accid. poisoning by other drugs acting on nervous system OS  | 1                        |
| T470500          | Accid poison gas/fume on ship - swimmer injured              | 1                        |
| SL24011          | ACTH - adrenocorticotropic hormone poisoning                 | 1                        |

**Table 13. ICD codes used in the studies of fatal self-harm.**

| <b>Study</b>     | <b>ICD version</b> | <b>List of codes</b>                               |
|------------------|--------------------|----------------------------------------------------|
| Carr, 2017       | ICD-10             | V01-Y98                                            |
| Coupland, 2015   | ICD-10             | not provided                                       |
| Doyle, 2016      | ICD-10             | X60-X84, Y10-34 (excluding Y33.9), Y87.0 and Y87.2 |
| Lalmohamed, 2012 | ICD-10             | V01-Y99                                            |
| Meier, 2004      | ICD-10             | not provided                                       |
| Schuerch, 2016   | ICD-10             | X60-X84, Y10-Y34                                   |
| Thomas, 2013     | ICD-10             | X60-X84, Y10-34 (excluding Y33.9)                  |
| Webb, 2012       | ICD-10             | X60-X84, Y10-34 (excluding Y33.9)                  |
| Windfuhr, 2016   | ICD-10             | X60-X84, Y10-34 (excluding Y33.9), Y87.0 and Y87.2 |

ICD - International Classification of Diseases
